# Supplementary material for: Ocean warming and acidification affect the transitional element and macromolecular accumulation in harmful raphidophyte Heterosigma akashiwo
Source: Research Square preprint supplement (doi:10.21203/rs.3.rs-2173912/v1), 2022-11-03
Supplement: Supplementary file 1 [file 375a5090a5bd904056d0ee00.xlsx]

## Sheet: Glycolysis or glugoneogenesis
Supplementary Table 3:	Differentially expressed genes involved in glycolysis/gluconeogenesis metabolism
Gene ID	Length	Pathway Name	Level 1	Level 2	log2(He_1000/He_400)	Qvalue(He_400-vs-He_1000)	Pvalue(He_400-vs-He_1000)	Kegg Orthology	Pfam	Nt	Nr	Kog	Swissprot	GO
Unigene1330_All	1539	ko01110//Biosynthesis of secondary metabolites;ko01100//Metabolic pathways;ko00010//Glycolysis / Gluconeogenesis	Metabolism	Carbohydrate metabolism;Global and overview maps	3.22027	0	0	K01792//glucose-6-phosphate 1-epimerase [EC:5.1.3.15]+ko00010//Glycolysis / Gluconeogenesis+ko01100//Metabolic pathways+ko01110//Biosynthesis of secondary metabolites	Aldose 1-epimerase		conserved carbohydrate binding protein [Ectocarpus siliculosus]	[G] KOG1594 Uncharacterized enzymes related to aldose 1-epimerase	Putative glucose-6-phosphate 1-epimerase OS=Cenchrus ciliaris PE=2 SV=1	GO:0030246//carbohydrate binding;GO:0047938//glucose-6-phosphate 1-epimerase activity;GO:0016853//isomerase activity;GO:0005975//carbohydrate metabolic process
Unigene39403_All	603	ko01100//Metabolic pathways;ko00010//Glycolysis / Gluconeogenesis;ko01110//Biosynthesis of secondary metabolites;ko00230//Purine metabolism;ko00500//Starch and sucrose metabolism;ko00030//Pentose phosphate pathway;ko00052//Galactose metabolism;ko00520//Amino sugar and nucleotide sugar metabolism	Metabolism	Nucleotide metabolism;Carbohydrate metabolism;Global and overview maps	3.21352	0.00013771	9.20335e-05	K01835//phosphoglucomutase [EC:5.4.2.2]+ko00010//Glycolysis / Gluconeogenesis+ko00230//Purine metabolism+ko00030//Pentose phosphate pathway+ko00520//Amino sugar and nucleotide sugar metabolism+ko01100//Metabolic pathways+ko00052//Galactose metabolism+ko00500//Starch and sucrose metabolism+ko01110//Biosynthesis of secondary metabolites;K01835//phosphoglucomutase [EC:5.4.2.2]+ko00010//Glycolysis / …	Phosphoglucomutase/phosphomannomutase, alpha/beta/alpha domain III	XR_833575.2 PREDICTED: Elaeis guineensis phosphoglucomutase, chloroplastic (LOC105054280), transcript variant X2, misc_RNA	phosphoglucomutase [Thalassiosira pseudonana CCMP1335] >EED93173.1 phosphoglucomutase [Thalassiosira pseudonana CCMP1335]	[G] KOG0625 Phosphoglucomutase	Phosphoglucomutase, chloroplastic OS=Solanum tuberosum GN=PGMP PE=2 SV=1	GO:0006006//glucose metabolic process;GO:0000287//magnesium ion binding;GO:0006011//UDP-glucose metabolic process;GO:0003983//UTP:glucose-1-phosphate uridylyltransferase activity;GO:0004614//phosphoglucomutase activity;GO:0016868//intramolecular transferase activity, phosphotransferases;GO:0005978//glycogen biosynthetic process;GO:0019388//galactose catabolic process;GO:0005829//cytosol;GO:000597…
Unigene6715_All	2343	ko00640//Propanoate metabolism;ko00260//Glycine, serine and threonine metabolism;ko00620//Pyruvate metabolism;ko01200//Carbon metabolism;ko00020//Citrate cycle (TCA cycle);ko00010//Glycolysis / Gluconeogenesis;ko01110//Biosynthesis of secondary metabolites;ko00630//Glyoxylate and dicarboxylate metabolism;ko01100//Metabolic pathways;ko00280//Valine, leucine and isoleucine degradation	Metabolism	Carbohydrate metabolism;Amino acid metabolism;Global and overview maps	1.86598	0	0	K00382//dihydrolipoamide dehydrogenase [EC:1.8.1.4]+ko00010//Glycolysis / Gluconeogenesis+ko00020//Citrate cycle (TCA cycle)+ko00280//Valine, leucine and isoleucine degradation+ko00640//Propanoate metabolism+ko01100//Metabolic pathways+ko01110//Biosynthesis of secondary metabolites+ko00260//Glycine, serine and threonine metabolism+ko00620//Pyruvate metabolism+ko01200//Carbon metabolism+ko00630//G…	Pyridine nucleotide-disulphide oxidoreductase		dihydrolipoamide dehydrogenase [Ectocarpus siliculosus]	[C] KOG1335 Dihydrolipoamide dehydrogenase	Dihydrolipoyl dehydrogenase 1, chloroplastic OS=Arabidopsis thaliana GN=LPD1 PE=2 SV=1	GO:0009055//electron transfer activity;GO:0004148//dihydrolipoyl dehydrogenase activity;GO:0005623//cell;GO:0050660//flavin adenine dinucleotide binding;GO:0045454//cell redox homeostasis
Unigene12170_All	1044	ko00710//Carbon fixation in photosynthetic organisms;ko00010//Glycolysis / Gluconeogenesis;ko00562//Inositol phosphate metabolism;ko01230//Biosynthesis of amino acids;ko01200//Carbon metabolism;ko00051//Fructose and mannose metabolism;ko01110//Biosynthesis of secondary metabolites;ko01100//Metabolic pathways	Metabolism	Global and overview maps;Carbohydrate metabolism;Energy metabolism	1.74089	3.86008e-229	1.66295e-230	K01803//triosephosphate isomerase (TIM) [EC:5.3.1.1]+ko00010//Glycolysis / Gluconeogenesis+ko01230//Biosynthesis of amino acids+ko01100//Metabolic pathways+ko00051//Fructose and mannose metabolism+ko01110//Biosynthesis of secondary metabolites+ko00710//Carbon fixation in photosynthetic organisms+ko01200//Carbon metabolism+ko00562//Inositol phosphate metabolism;K01803//triosephosphate isomerase (T…	Triosephosphate isomerase	XM_005759920.1 Emiliania huxleyi CCMP1516 triose-phosphate isomerase (TIM), partial mRNA >XM_005776855.1 Emiliania huxleyi CCMP1516 hypothetical protein partial mRNA	triose phosphate isomerase [Thalassiosira pseudonana CCMP1335] >ACI64671.1 triose phosphate isomerase [Thalassiosira pseudonana CCMP1335]	[G] KOG1643 Triosephosphate isomerase	Triosephosphate isomerase, cytosolic OS=Hordeum vulgare PE=1 SV=3	GO:0006098//pentose-phosphate shunt;GO:0019563//glycerol catabolic process;GO:0006094//gluconeogenesis;GO:0005829//cytosol;GO:0006096//glycolytic process;GO:0046166//glyceraldehyde-3-phosphate biosynthetic process;GO:0004807//triose-phosphate isomerase activity
Unigene225_All	2017	ko00020//Citrate cycle (TCA cycle);ko01110//Biosynthesis of secondary metabolites;ko01100//Metabolic pathways;ko00010//Glycolysis / Gluconeogenesis;ko00710//Carbon fixation in photosynthetic organisms;ko00620//Pyruvate metabolism;ko01200//Carbon metabolism	Metabolism	Carbohydrate metabolism;Global and overview maps;Energy metabolism	1.63169	4.10303e-31	7.75705e-32	K01610//phosphoenolpyruvate carboxykinase (ATP) [EC:4.1.1.49]+ko00010//Glycolysis / Gluconeogenesis+ko00020//Citrate cycle (TCA cycle)+ko01100//Metabolic pathways+ko01110//Biosynthesis of secondary metabolites+ko00710//Carbon fixation in photosynthetic organisms+ko00620//Pyruvate metabolism+ko01200//Carbon metabolism;K01610//phosphoenolpyruvate carboxykinase (ATP) [EC:4.1.1.49]+ko00010//Glycolysi…	Phosphoenolpyruvate carboxykinase		phosphoenolpyruvate carboxykinase [Thalassiosira pseudonana]	[C] TWOG0797 Phosphoenolpyruvate carboxykinase (ATP)	Phosphoenolpyruvate carboxykinase (ATP) 2 OS=Urochloa panicoides GN=PCK2 PE=2 SV=1	GO:0005524//ATP binding;GO:0006094//gluconeogenesis;GO:0016301//kinase activity;GO:0005829//cytosol;GO:0004612//phosphoenolpyruvate carboxykinase (ATP) activity
Unigene46375_All	1254	ko00030//Pentose phosphate pathway;ko00710//Carbon fixation in photosynthetic organisms;ko00010//Glycolysis / Gluconeogenesis;ko01100//Metabolic pathways;ko01110//Biosynthesis of secondary metabolites;ko01200//Carbon metabolism;ko00051//Fructose and mannose metabolism;ko01230//Biosynthesis of amino acids	Metabolism	Global and overview maps;Carbohydrate metabolism;Energy metabolism	1.44799	1.80512e-07	8.7728e-08	K01624//fructose-bisphosphate aldolase, class II [EC:4.1.2.13]+ko00010//Glycolysis / Gluconeogenesis+ko00030//Pentose phosphate pathway+ko01230//Biosynthesis of amino acids+ko01100//Metabolic pathways+ko00051//Fructose and mannose metabolism+ko01110//Biosynthesis of secondary metabolites+ko00710//Carbon fixation in photosynthetic organisms+ko01200//Carbon metabolism;K01624//fructose-bisphosphate …	Fructose-bisphosphate aldolase class-II	XM_002289967.1 Thalassiosira pseudonana CCMP1335 predicted protein mRNA	predicted protein [Thalassiosira pseudonana CCMP1335] >EED93540.1 predicted protein [Thalassiosira pseudonana CCMP1335]	[G] KOG4153 Fructose 1,6-bisphosphate aldolase		GO:0005618//cell wall;GO:0006094//gluconeogenesis;GO:0004332//fructose-bisphosphate aldolase activity;GO:0005829//cytosol;GO:0006096//glycolytic process;GO:0008270//zinc ion binding;GO:0005886//plasma membrane
Unigene22028_All	1347	ko03018//RNA degradation;ko01110//Biosynthesis of secondary metabolites;ko01230//Biosynthesis of amino acids;ko01200//Carbon metabolism;ko01100//Metabolic pathways;ko00010//Glycolysis / Gluconeogenesis	Genetic Information Processing;Metabolism	Carbohydrate metabolism;Folding, sorting and degradation;Global and overview maps	1.33704	1.08626e-10	4.19251e-11	K01689//enolase [EC:4.2.1.11]+ko00010//Glycolysis / Gluconeogenesis+ko01230//Biosynthesis of amino acids+ko03018//RNA degradation+ko01100//Metabolic pathways+ko01110//Biosynthesis of secondary metabolites+ko01200//Carbon metabolism;K01689//enolase [EC:4.2.1.11]+ko00010//Glycolysis / Gluconeogenesis+ko01230//Biosynthesis of amino acids+ko03018//RNA degradation+ko01100//Metabolic pathways+ko01110//…	Enolase, C-terminal TIM barrel domain		Enolase (chromatophore) [Paulinella chromatophora] >ACB42803.1 Enolase (chromatophore) [Paulinella chromatophora]	[G] KOG2670 Enolase	Enolase OS=Ricinus communis PE=2 SV=1	GO:0000287//magnesium ion binding;GO:0004634//phosphopyruvate hydratase activity;GO:0006096//glycolytic process;GO:0000015//phosphopyruvate hydratase complex;GO:0009536//plastid
Unigene40910_All	823	ko00260//Glycine, serine and threonine metabolism;ko01200//Carbon metabolism;ko01230//Biosynthesis of amino acids;ko00010//Glycolysis / Gluconeogenesis;ko01100//Metabolic pathways;ko01110//Biosynthesis of secondary metabolites	Metabolism	Carbohydrate metabolism;Global and overview maps;Amino acid metabolism	1.17974	2.79428e-18	7.54649e-19	K01834//2,3-bisphosphoglycerate-dependent phosphoglycerate mutase [EC:5.4.2.11]+ko00010//Glycolysis / Gluconeogenesis+ko01230//Biosynthesis of amino acids+ko01100//Metabolic pathways+ko01110//Biosynthesis of secondary metabolites+ko00260//Glycine, serine and threonine metabolism+ko01200//Carbon metabolism	Histidine phosphatase superfamily (branch 1)	LT669788.1 Arabis alpina genome assembly, chromosome: 1	phosphoglycerate mutase [Phaeodactylum tricornutum CCAP 1055/1] >EEC51229.1 phosphoglycerate mutase [Phaeodactylum tricornutum CCAP 1055/1]	[G] KOG0235 Phosphoglycerate mutase		GO:0004619//phosphoglycerate mutase activity;GO:0006096//glycolytic process
CL4986.Contig2_All	2000	ko01100//Metabolic pathways;ko00230//Purine metabolism;ko01230//Biosynthesis of amino acids;ko00620//Pyruvate metabolism;ko00010//Glycolysis / Gluconeogenesis;ko01200//Carbon metabolism;ko01110//Biosynthesis of secondary metabolites	Metabolism	Nucleotide metabolism;Global and overview maps;Carbohydrate metabolism	1.17718	0	0	K00873//pyruvate kinase [EC:2.7.1.40]+ko00010//Glycolysis / Gluconeogenesis+ko00230//Purine metabolism+ko01230//Biosynthesis of amino acids+ko01100//Metabolic pathways+ko01110//Biosynthesis of secondary metabolites+ko00620//Pyruvate metabolism+ko01200//Carbon metabolism;K00873//pyruvate kinase [EC:2.7.1.40]+ko00010//Glycolysis / Gluconeogenesis+ko00230//Purine metabolism+ko01230//Biosynthesis of …	Pyruvate kinase, barrel domain	KM113644.1 Sargassum hemiphyllum var. chinense isolate VYER-2086342 pyruvate kinase (pk) mRNA, complete cds	pyruvate kinase [Aphanomyces astaci] >ETV87778.1 pyruvate kinase [Aphanomyces astaci]	[G] KOG2323 Pyruvate kinase	Pyruvate kinase, cytosolic isozyme OS=Glycine max PE=2 SV=1	GO:0030955//potassium ion binding;GO:0000287//magnesium ion binding;GO:0004743//pyruvate kinase activity;GO:0016301//kinase activity
CL3052.Contig2_All	1945	ko01110//Biosynthesis of secondary metabolites;ko01100//Metabolic pathways;ko01200//Carbon metabolism;ko00010//Glycolysis / Gluconeogenesis;ko00051//Fructose and mannose metabolism;ko00710//Carbon fixation in photosynthetic organisms;ko00030//Pentose phosphate pathway	Metabolism	Energy metabolism;Global and overview maps;Carbohydrate metabolism	1.11699	0	0	K03841//fructose-1,6-bisphosphatase I [EC:3.1.3.11]+ko00010//Glycolysis / Gluconeogenesis+ko00030//Pentose phosphate pathway+ko01100//Metabolic pathways+ko00051//Fructose and mannose metabolism+ko01110//Biosynthesis of secondary metabolites+ko00710//Carbon fixation in photosynthetic organisms+ko01200//Carbon metabolism;K03841//fructose-1,6-bisphosphatase I [EC:3.1.3.11]+ko00010//Glycolysis / Gluc…	Fructose-1-6-bisphosphatase, N-terminal domain	XM_005848280.1 Chlorella variabilis hypothetical protein (CHLNCDRAFT_57654) mRNA, complete cds	Fructose-bisphosphatase [Ectocarpus siliculosus]	[G] KOG1458 Fructose-1,6-bisphosphatase	Fructose-1,6-bisphosphatase 1, chloroplastic OS=Arabidopsis thaliana GN=CFBP1 PE=1 SV=2	GO:0009773//photosynthetic electron transport in photosystem I;GO:0009409//response to cold;GO:0005985//sucrose metabolic process;GO:0009735//response to cytokinin;GO:0005975//carbohydrate metabolic process;GO:0042132//fructose 1,6-bisphosphate 1-phosphatase activity;GO:0009570//chloroplast stroma;GO:0030388//fructose 1,6-bisphosphate metabolic process
CL3052.Contig1_All	2856	ko00051//Fructose and mannose metabolism;ko00710//Carbon fixation in photosynthetic organisms;ko00030//Pentose phosphate pathway;ko01100//Metabolic pathways;ko00010//Glycolysis / Gluconeogenesis;ko01200//Carbon metabolism;ko01110//Biosynthesis of secondary metabolites	Metabolism	Energy metabolism;Carbohydrate metabolism;Global and overview maps	1.09748	0	0	K03841//fructose-1,6-bisphosphatase I [EC:3.1.3.11]+ko00010//Glycolysis / Gluconeogenesis+ko00030//Pentose phosphate pathway+ko01100//Metabolic pathways+ko00051//Fructose and mannose metabolism+ko01110//Biosynthesis of secondary metabolites+ko00710//Carbon fixation in photosynthetic organisms+ko01200//Carbon metabolism;K03841//fructose-1,6-bisphosphatase I [EC:3.1.3.11]+ko00010//Glycolysis / Gluc…	Fructose-1-6-bisphosphatase, N-terminal domain	XM_005848280.1 Chlorella variabilis hypothetical protein (CHLNCDRAFT_57654) mRNA, complete cds	Fructose-bisphosphatase [Ectocarpus siliculosus]	[G] KOG1458 Fructose-1,6-bisphosphatase	Fructose-1,6-bisphosphatase 1, chloroplastic OS=Arabidopsis thaliana GN=CFBP1 PE=1 SV=2	GO:0009773//photosynthetic electron transport in photosystem I;GO:0009409//response to cold;GO:0005985//sucrose metabolic process;GO:0009735//response to cytokinin;GO:0005975//carbohydrate metabolic process;GO:0042132//fructose 1,6-bisphosphate 1-phosphatase activity;GO:0009570//chloroplast stroma;GO:0030388//fructose 1,6-bisphosphate metabolic process
CL7339.Contig2_All	3548	ko01100//Metabolic pathways;ko00520//Amino sugar and nucleotide sugar metabolism;ko00230//Purine metabolism;ko00030//Pentose phosphate pathway;ko01110//Biosynthesis of secondary metabolites;ko00052//Galactose metabolism;ko00500//Starch and sucrose metabolism;ko00010//Glycolysis / Gluconeogenesis	Metabolism	Global and overview maps;Nucleotide metabolism;Carbohydrate metabolism	1.07454	0	0	K01835//phosphoglucomutase [EC:5.4.2.2]+ko00010//Glycolysis / Gluconeogenesis+ko00230//Purine metabolism+ko00030//Pentose phosphate pathway+ko00520//Amino sugar and nucleotide sugar metabolism+ko01100//Metabolic pathways+ko00052//Galactose metabolism+ko00500//Starch and sucrose metabolism+ko01110//Biosynthesis of secondary metabolites;K01835//phosphoglucomutase [EC:5.4.2.2]+ko00010//Glycolysis / …	Adenylate kinase	XM_011400771.1 Auxenochlorella protothecoides Phosphoglucomutase, chloroplastic partial mRNA	phosphoglucomutase [Nannochloropsis gaditana]	[G] KOG0625 Phosphoglucomutase	Probable phosphoglucomutase, cytoplasmic 1 OS=Arabidopsis thaliana GN=At1g23190 PE=2 SV=2	GO:0000287//magnesium ion binding;GO:0005975//carbohydrate metabolic process;GO:0004614//phosphoglucomutase activity
CL3797.Contig1_All	1832	ko00051//Fructose and mannose metabolism;ko01200//Carbon metabolism;ko01100//Metabolic pathways;ko00030//Pentose phosphate pathway;ko00010//Glycolysis / Gluconeogenesis;ko01110//Biosynthesis of secondary metabolites;ko00710//Carbon fixation in photosynthetic organisms	Metabolism	Carbohydrate metabolism;Energy metabolism;Global and overview maps	1.01929	5.43973e-26	1.15817e-26	K03841//fructose-1,6-bisphosphatase I [EC:3.1.3.11]+ko00010//Glycolysis / Gluconeogenesis+ko00030//Pentose phosphate pathway+ko01100//Metabolic pathways+ko00051//Fructose and mannose metabolism+ko01110//Biosynthesis of secondary metabolites+ko00710//Carbon fixation in photosynthetic organisms+ko01200//Carbon metabolism;K03841//fructose-1,6-bisphosphatase I [EC:3.1.3.11]+ko00010//Glycolysis / Gluc…	Fructose-1-6-bisphosphatase, N-terminal domain		putative fructose-1,6-bishosphatase [Fragilariopsis cylindrus CCMP1102]	[G] KOG1458 Fructose-1,6-bisphosphatase	Fructose-1,6-bisphosphatase, cytosolic OS=Oryza coarctata PE=2 SV=1	GO:0009773//photosynthetic electron transport in photosystem I;GO:0009409//response to cold;GO:0005985//sucrose metabolic process;GO:0009735//response to cytokinin;GO:0005975//carbohydrate metabolic process;GO:0042132//fructose 1,6-bisphosphate 1-phosphatase activity;GO:0009570//chloroplast stroma;GO:0030388//fructose 1,6-bisphosphate metabolic process
CL10574.Contig2_All	2616	ko00010//Glycolysis / Gluconeogenesis;ko01200//Carbon metabolism;ko00640//Propanoate metabolism;ko01110//Biosynthesis of secondary metabolites;ko00620//Pyruvate metabolism;ko00630//Glyoxylate and dicarboxylate metabolism;ko01100//Metabolic pathways	Metabolism	Carbohydrate metabolism;Global and overview maps	1.01843	3.44766e-300	1.18295e-301	K01895//acetyl-CoA synthetase [EC:6.2.1.1]+ko00010//Glycolysis / Gluconeogenesis+ko00640//Propanoate metabolism+ko01100//Metabolic pathways+ko01110//Biosynthesis of secondary metabolites+ko00620//Pyruvate metabolism+ko01200//Carbon metabolism+ko00630//Glyoxylate and dicarboxylate metabolism;K01895//acetyl-CoA synthetase [EC:6.2.1.1]+ko00010//Glycolysis / Gluconeogenesis+ko00640//Propanoate metabo…	AMP-binding enzyme	XM_001700178.1 Chlamydomonas reinhardtii acetyl CoA synthetase (ACS2), partial mRNA	acetyl- synthetase [Nannochloropsis gaditana]	[I] KOG1175 Acyl-CoA synthetase	Acetyl-coenzyme A synthetase, chloroplastic/glyoxysomal OS=Arabidopsis thaliana GN=ACS PE=1 SV=1	GO:0019427//acetyl-CoA biosynthetic process from acetate;GO:0003987//acetate-CoA ligase activity;GO:0005524//ATP binding;GO:0016208//AMP binding
Unigene48554_All	2542	ko01110//Biosynthesis of secondary metabolites;ko01100//Metabolic pathways;ko00620//Pyruvate metabolism;ko00020//Citrate cycle (TCA cycle);ko00010//Glycolysis / Gluconeogenesis;ko01200//Carbon metabolism	Metabolism	Carbohydrate metabolism;Global and overview maps	1.00465	0	0	K00161//pyruvate dehydrogenase E1 component alpha subunit [EC:1.2.4.1]+ko00010//Glycolysis / Gluconeogenesis+ko00020//Citrate cycle (TCA cycle)+ko01100//Metabolic pathways+ko01110//Biosynthesis of secondary metabolites+ko00620//Pyruvate metabolism+ko01200//Carbon metabolism;K00161//pyruvate dehydrogenase E1 component alpha subunit [EC:1.2.4.1]+ko00010//Glycolysis / Gluconeogenesis+ko00020//Citrat…	Dehydrogenase E1 component	XM_009037186.1 Aureococcus anophagefferens hypothetical protein mRNA	pyruvate dehydrogenase e1 component alpha subunit [Nannochloropsis gaditana]	[C] KOG0225 Pyruvate dehydrogenase E1, alpha subunit	Pyruvate dehydrogenase E1 component subunit alpha-2, mitochondrial OS=Arabidopsis thaliana GN=IAR4 PE=1 SV=2	GO:0043231//intracellular membrane-bounded organelle;GO:0004739//pyruvate dehydrogenase (acetyl-transferring) activity;GO:0006086//acetyl-CoA biosynthetic process from pyruvate
Unigene18571_All	1530	ko01200//Carbon metabolism;ko01110//Biosynthesis of secondary metabolites;ko00010//Glycolysis / Gluconeogenesis;ko00620//Pyruvate metabolism;ko01100//Metabolic pathways;ko00020//Citrate cycle (TCA cycle)	Metabolism	Global and overview maps;Carbohydrate metabolism	-1.00224	6.96124e-183	3.59258e-184	K00162//pyruvate dehydrogenase E1 component beta subunit [EC:1.2.4.1]+ko00010//Glycolysis / Gluconeogenesis+ko00020//Citrate cycle (TCA cycle)+ko01100//Metabolic pathways+ko01110//Biosynthesis of secondary metabolites+ko00620//Pyruvate metabolism+ko01200//Carbon metabolism;K00162//pyruvate dehydrogenase E1 component beta subunit [EC:1.2.4.1]+ko00010//Glycolysis / Gluconeogenesis+ko00020//Citrate …		XM_005846322.1 Chlorella variabilis hypothetical protein (CHLNCDRAFT_59713) mRNA, complete cds	Pyruvate dehydrogenase E1 component subunit beta [Phytophthora megakarya]	[C] KOG0524 Pyruvate dehydrogenase E1, beta subunit	Pyruvate dehydrogenase E1 component subunit beta-1, mitochondrial OS=Oryza sativa subsp. japonica GN=Os08g0536000 PE=2 SV=1	GO:0005759//mitochondrial matrix;GO:0006096//glycolytic process;GO:0004739//pyruvate dehydrogenase (acetyl-transferring) activity;GO:0006086//acetyl-CoA biosynthetic process from pyruvate
CL6508.Contig1_All	1292	ko01200//Carbon metabolism;ko01230//Biosynthesis of amino acids;ko00010//Glycolysis / Gluconeogenesis;ko00710//Carbon fixation in photosynthetic organisms;ko01100//Metabolic pathways;ko00051//Fructose and mannose metabolism;ko00562//Inositol phosphate metabolism;ko01110//Biosynthesis of secondary metabolites	Metabolism	Energy metabolism;Global and overview maps;Carbohydrate metabolism	-1.01826	9.71618e-06	5.61332e-06	K01803//triosephosphate isomerase (TIM) [EC:5.3.1.1]+ko00010//Glycolysis / Gluconeogenesis+ko01230//Biosynthesis of amino acids+ko01100//Metabolic pathways+ko00051//Fructose and mannose metabolism+ko01110//Biosynthesis of secondary metabolites+ko00710//Carbon fixation in photosynthetic organisms+ko01200//Carbon metabolism+ko00562//Inositol phosphate metabolism;K01803//triosephosphate isomerase (T…	Triosephosphate isomerase	AP015041.1 Vigna angularis var. angularis DNA, chromosome 8, almost complete sequence, cultivar: Shumari	Triosephosphate isomerase [Ectocarpus siliculosus]	[G] KOG1643 Triosephosphate isomerase	Triosephosphate isomerase, cytosolic OS=Hordeum vulgare PE=1 SV=3	GO:0006098//pentose-phosphate shunt;GO:0006094//gluconeogenesis;GO:0006096//glycolytic process;GO:0004807//triose-phosphate isomerase activity
Unigene5032_All	3354	ko00260//Glycine, serine and threonine metabolism;ko00010//Glycolysis / Gluconeogenesis;ko00630//Glyoxylate and dicarboxylate metabolism;ko00620//Pyruvate metabolism;ko01200//Carbon metabolism;ko00280//Valine, leucine and isoleucine degradation;ko01110//Biosynthesis of secondary metabolites;ko01100//Metabolic pathways;ko00640//Propanoate metabolism;ko00020//Citrate cycle (TCA cycle)	Metabolism	Global and overview maps;Amino acid metabolism;Carbohydrate metabolism	-1.04263	3.83716e-87	3.44738e-88	K00382//dihydrolipoamide dehydrogenase [EC:1.8.1.4]+ko00010//Glycolysis / Gluconeogenesis+ko00020//Citrate cycle (TCA cycle)+ko00280//Valine, leucine and isoleucine degradation+ko00640//Propanoate metabolism+ko01100//Metabolic pathways+ko01110//Biosynthesis of secondary metabolites+ko00260//Glycine, serine and threonine metabolism+ko00620//Pyruvate metabolism+ko01200//Carbon metabolism+ko00630//G…	Pyridine nucleotide-disulphide oxidoreductase		dihydrolipoamide dehydrogenase [Ectocarpus siliculosus]	[C] KOG1335 Dihydrolipoamide dehydrogenase	Dihydrolipoyl dehydrogenase 1, chloroplastic OS=Arabidopsis thaliana GN=LPD1 PE=2 SV=1	GO:0009055//electron transfer activity;GO:0004148//dihydrolipoyl dehydrogenase activity;GO:0005623//cell;GO:0050660//flavin adenine dinucleotide binding;GO:0045454//cell redox homeostasis
Unigene38912_All	646	ko00020//Citrate cycle (TCA cycle);ko03040//Spliceosome;ko01110//Biosynthesis of secondary metabolites;ko00620//Pyruvate metabolism;ko01100//Metabolic pathways;ko00010//Glycolysis / Gluconeogenesis;ko01200//Carbon metabolism	Metabolism;Genetic Information Processing	Transcription;Global and overview maps;Carbohydrate metabolism	-1.0933	0.000166037	0.00011208	K12896//splicing factor, arginine/serine-rich 7+ko03040//Spliceosome;K02184//formin 2;K02184//formin 2;K02184//formin 2;K00627//pyruvate dehydrogenase E2 component (dihydrolipoamide acetyltransferase) [EC:2.3.1.12]+ko00010//Glycolysis / Gluconeogenesis+ko00020//Citrate cycle (TCA cycle)+ko01100//Metabolic pathways+ko01110//Biosynthesis of secondary metabolites+ko00620//Pyruvate metabolism+ko01200…			hypothetical protein BU14_0131s0028, partial [Porphyra umbilicalis]	[T] KOG4270 GTPase-activator protein	Proline-rich receptor-like protein kinase PERK8 OS=Arabidopsis thaliana GN=PERK8 PE=1 SV=1	GO:0004674//protein serine/threonine kinase activity;GO:0005524//ATP binding;GO:0005509//calcium ion binding;GO:0016021//integral component of membrane
Unigene25848_All	2221	ko00620//Pyruvate metabolism;ko00010//Glycolysis / Gluconeogenesis;ko01110//Biosynthesis of secondary metabolites;ko01100//Metabolic pathways;ko00630//Glyoxylate and dicarboxylate metabolism;ko00280//Valine, leucine and isoleucine degradation;ko01200//Carbon metabolism;ko00260//Glycine, serine and threonine metabolism;ko00640//Propanoate metabolism;ko00020//Citrate cycle (TCA cycle)	Metabolism	Amino acid metabolism;Carbohydrate metabolism;Global and overview maps	-1.09481	4.01468e-77	3.93712e-78	K00382//dihydrolipoamide dehydrogenase [EC:1.8.1.4]+ko00010//Glycolysis / Gluconeogenesis+ko00020//Citrate cycle (TCA cycle)+ko00280//Valine, leucine and isoleucine degradation+ko00640//Propanoate metabolism+ko01100//Metabolic pathways+ko01110//Biosynthesis of secondary metabolites+ko00260//Glycine, serine and threonine metabolism+ko00620//Pyruvate metabolism+ko01200//Carbon metabolism+ko00630//G…	Pyridine nucleotide-disulphide oxidoreductase		predicted protein [Phaeodactylum tricornutum CCAP 1055/1] >EEC48570.1 predicted protein [Phaeodactylum tricornutum CCAP 1055/1]	[C] KOG1335 Dihydrolipoamide dehydrogenase	Leghemoglobin reductase OS=Glycine max GN=FLBR PE=1 SV=1	GO:0050661//NADP binding;GO:0006749//glutathione metabolic process;GO:0005623//cell;GO:0050660//flavin adenine dinucleotide binding;GO:0016021//integral component of membrane;GO:0004362//glutathione-disulfide reductase activity;GO:0045454//cell redox homeostasis
Unigene15030_All	991	ko00010//Glycolysis / Gluconeogenesis;ko01110//Biosynthesis of secondary metabolites;ko00620//Pyruvate metabolism;ko00020//Citrate cycle (TCA cycle);ko01200//Carbon metabolism;ko01100//Metabolic pathways	Metabolism	Global and overview maps;Carbohydrate metabolism	-1.11591	6.62171e-09	2.87199e-09	K00627//pyruvate dehydrogenase E2 component (dihydrolipoamide acetyltransferase) [EC:2.3.1.12]+ko00010//Glycolysis / Gluconeogenesis+ko00020//Citrate cycle (TCA cycle)+ko01100//Metabolic pathways+ko01110//Biosynthesis of secondary metabolites+ko00620//Pyruvate metabolism+ko01200//Carbon metabolism	Prefoldin subunit		PREDICTED: formin-like protein 14 [Vigna angularis]
Unigene10339_All	2382	ko01200//Carbon metabolism;ko00640//Propanoate metabolism;ko00020//Citrate cycle (TCA cycle);ko00010//Glycolysis / Gluconeogenesis;ko01110//Biosynthesis of secondary metabolites;ko00630//Glyoxylate and dicarboxylate metabolism;ko00260//Glycine, serine and threonine metabolism;ko01100//Metabolic pathways;ko00280//Valine, leucine and isoleucine degradation;ko00620//Pyruvate metabolism	Metabolism	Carbohydrate metabolism;Amino acid metabolism;Global and overview maps	-1.13854	1.52029e-60	1.79119e-61	K00382//dihydrolipoamide dehydrogenase [EC:1.8.1.4]+ko00010//Glycolysis / Gluconeogenesis+ko00020//Citrate cycle (TCA cycle)+ko00280//Valine, leucine and isoleucine degradation+ko00640//Propanoate metabolism+ko01100//Metabolic pathways+ko01110//Biosynthesis of secondary metabolites+ko00260//Glycine, serine and threonine metabolism+ko00620//Pyruvate metabolism+ko01200//Carbon metabolism+ko00630//G…	Pyridine nucleotide-disulphide oxidoreductase	XM_009038694.1 Aureococcus anophagefferens mercuric reductase (MER1), partial mRNA	mercuric reductase [Ectocarpus siliculosus]	[C] KOG1335 Dihydrolipoamide dehydrogenase	Leghemoglobin reductase OS=Vigna unguiculata GN=FLBR PE=1 SV=1	GO:0009055//electron transfer activity;GO:0005623//cell;GO:0050660//flavin adenine dinucleotide binding;GO:0016021//integral component of membrane;GO:0016668//oxidoreductase activity, acting on a sulfur group of donors, NAD(P) as acceptor;GO:0045454//cell redox homeostasis;GO:0016491//oxidoreductase activity
CL10502.Contig2_All	1732	ko01200//Carbon metabolism;ko00010//Glycolysis / Gluconeogenesis;ko01100//Metabolic pathways;ko01110//Biosynthesis of secondary metabolites;ko00020//Citrate cycle (TCA cycle);ko00620//Pyruvate metabolism	Metabolism	Global and overview maps;Carbohydrate metabolism	-1.22293	7.62321e-236	3.21514e-237	K00161//pyruvate dehydrogenase E1 component alpha subunit [EC:1.2.4.1]+ko00010//Glycolysis / Gluconeogenesis+ko00020//Citrate cycle (TCA cycle)+ko01100//Metabolic pathways+ko01110//Biosynthesis of secondary metabolites+ko00620//Pyruvate metabolism+ko01200//Carbon metabolism;K00161//pyruvate dehydrogenase E1 component alpha subunit [EC:1.2.4.1]+ko00010//Glycolysis / Gluconeogenesis+ko00020//Citrat…	Dehydrogenase E1 component	XM_009037186.1 Aureococcus anophagefferens hypothetical protein mRNA	pyruvate dehydrogenase e1 component alpha subunit [Nannochloropsis gaditana]	[C] KOG0225 Pyruvate dehydrogenase E1, alpha subunit	Pyruvate dehydrogenase E1 component subunit alpha-2, mitochondrial OS=Arabidopsis thaliana GN=IAR4 PE=1 SV=2	GO:0043231//intracellular membrane-bounded organelle;GO:0004739//pyruvate dehydrogenase (acetyl-transferring) activity;GO:0006086//acetyl-CoA biosynthetic process from pyruvate
Unigene30034_All	1573	ko01110//Biosynthesis of secondary metabolites;ko01100//Metabolic pathways;ko00710//Carbon fixation in photosynthetic organisms;ko00010//Glycolysis / Gluconeogenesis;ko01230//Biosynthesis of amino acids;ko01200//Carbon metabolism;ko04141//Protein processing in endoplasmic reticulum	Genetic Information Processing;Metabolism	Carbohydrate metabolism;Global and overview maps;Energy metabolism;Folding, sorting and degradation	-1.23371	0.00016277	0.000109761	K00134//glyceraldehyde 3-phosphate dehydrogenase [EC:1.2.1.12]+ko00010//Glycolysis / Gluconeogenesis+ko01230//Biosynthesis of amino acids+ko01100//Metabolic pathways+ko01110//Biosynthesis of secondary metabolites+ko00710//Carbon fixation in photosynthetic organisms+ko01200//Carbon metabolism;K08653//membrane-bound transcription factor site-1 protease [EC:3.4.21.112]+ko04141//Protein processing in…	Subtilase family		hypothetical protein VOLCADRAFT_88007 [Volvox carteri f. nagariensis] >EFJ51185.1 hypothetical protein VOLCADRAFT_88007 [Volvox carteri f. nagariensis]	[O] KOG1153 Subtilisin-related protease/Vacuolar protease B	Subtilisin-like protease SBT1.9 OS=Arabidopsis thaliana GN=SBT1.9 PE=2 SV=1	GO:0004252//serine-type endopeptidase activity;GO:0016021//integral component of membrane
Unigene37919_All	1500	ko01100//Metabolic pathways;ko01110//Biosynthesis of secondary metabolites;ko00010//Glycolysis / Gluconeogenesis;ko00040//Pentose and glucuronate interconversions;ko00561//Glycerolipid metabolism	Metabolism	Global and overview maps;Carbohydrate metabolism;Lipid metabolism	-1.28103	0	0	K00002//alcohol dehydrogenase (NADP+) [EC:1.1.1.2]+ko00010//Glycolysis / Gluconeogenesis+ko00040//Pentose and glucuronate interconversions+ko01100//Metabolic pathways+ko01110//Biosynthesis of secondary metabolites+ko00561//Glycerolipid metabolism;K00002//alcohol dehydrogenase (NADP+) [EC:1.1.1.2]+ko00010//Glycolysis / Gluconeogenesis+ko00040//Pentose and glucuronate interconversions+ko01100//Meta…	Aldo/keto reductase family		hypothetical protein PAHAL_E00961 [Panicum hallii]	[R] KOG1577 Aldo/keto reductase family proteins	NADPH-dependent aldo-keto reductase, chloroplastic OS=Arabidopsis thaliana GN=AKR4C9 PE=1 SV=1	GO:0016491//oxidoreductase activity
CL10853.Contig3_All	1436	ko01110//Biosynthesis of secondary metabolites;ko01200//Carbon metabolism;ko00010//Glycolysis / Gluconeogenesis;ko01230//Biosynthesis of amino acids;ko00260//Glycine, serine and threonine metabolism;ko01100//Metabolic pathways	Metabolism	Global and overview maps;Carbohydrate metabolism;Amino acid metabolism	-1.28453	3.19059e-111	2.40575e-112	K01834//2,3-bisphosphoglycerate-dependent phosphoglycerate mutase [EC:5.4.2.11]+ko00010//Glycolysis / Gluconeogenesis+ko01230//Biosynthesis of amino acids+ko01100//Metabolic pathways+ko01110//Biosynthesis of secondary metabolites+ko00260//Glycine, serine and threonine metabolism+ko01200//Carbon metabolism;K01834//2,3-bisphosphoglycerate-dependent phosphoglycerate mutase [EC:5.4.2.11]+ko00010//Gly…	Histidine phosphatase superfamily (branch 1)		conserved unknown protein [Ectocarpus siliculosus]	[G] KOG0235 Phosphoglycerate mutase	Phosphoglycerate mutase-like protein 4 OS=Arabidopsis thaliana GN=At3g50520 PE=2 SV=1	GO:0004619//phosphoglycerate mutase activity;GO:0006096//glycolytic process
Unigene25818_All	1513	ko00640//Propanoate metabolism;ko00280//Valine, leucine and isoleucine degradation;ko00260//Glycine, serine and threonine metabolism;ko01110//Biosynthesis of secondary metabolites;ko00010//Glycolysis / Gluconeogenesis;ko00620//Pyruvate metabolism;ko01200//Carbon metabolism;ko00020//Citrate cycle (TCA cycle);ko01100//Metabolic pathways;ko00630//Glyoxylate and dicarboxylate metabolism	Metabolism	Global and overview maps;Carbohydrate metabolism;Amino acid metabolism	-1.31125	1.64996e-08	7.36698e-09	K00382//dihydrolipoamide dehydrogenase [EC:1.8.1.4]+ko00010//Glycolysis / Gluconeogenesis+ko00020//Citrate cycle (TCA cycle)+ko00280//Valine, leucine and isoleucine degradation+ko00640//Propanoate metabolism+ko01100//Metabolic pathways+ko01110//Biosynthesis of secondary metabolites+ko00260//Glycine, serine and threonine metabolism+ko00620//Pyruvate metabolism+ko01200//Carbon metabolism+ko00630//G…	Pyridine nucleotide-disulphide oxidoreductase		PREDICTED: dihydrolipoyl dehydrogenase, mitochondrial [Erythranthe guttata] >EYU33082.1 hypothetical protein MIMGU_mgv1a004880mg [Erythranthe guttata]	[C] KOG1335 Dihydrolipoamide dehydrogenase	Dihydrolipoyl dehydrogenase 2, mitochondrial OS=Arabidopsis thaliana GN=LPD2 PE=1 SV=1	GO:0009055//electron transfer activity;GO:0004148//dihydrolipoyl dehydrogenase activity;GO:0005623//cell;GO:0050660//flavin adenine dinucleotide binding;GO:0045454//cell redox homeostasis
CL2046.Contig1_All	960	ko01100//Metabolic pathways;ko01230//Biosynthesis of amino acids;ko00710//Carbon fixation in photosynthetic organisms;ko00010//Glycolysis / Gluconeogenesis;ko01200//Carbon metabolism;ko01110//Biosynthesis of secondary metabolites	Metabolism	Global and overview maps;Energy metabolism;Carbohydrate metabolism	-1.32069	7.43939e-18	2.03758e-18	K00927//phosphoglycerate kinase [EC:2.7.2.3]+ko00010//Glycolysis / Gluconeogenesis+ko01230//Biosynthesis of amino acids+ko01100//Metabolic pathways+ko01110//Biosynthesis of secondary metabolites+ko00710//Carbon fixation in photosynthetic organisms+ko01200//Carbon metabolism;K00927//phosphoglycerate kinase [EC:2.7.2.3]+ko00010//Glycolysis / Gluconeogenesis+ko01230//Biosynthesis of amino acids+ko01…	Phosphoglycerate kinase	XM_020352380.1 PREDICTED: Cajanus cajan phosphoglycerate kinase, cytosolic (LOC109792930), mRNA	hypothetical protein BRADI_2g21120 [Brachypodium distachyon]	[G] KOG1367 3-phosphoglycerate kinase	Phosphoglycerate kinase, chloroplastic OS=Volvox carteri GN=PGK PE=2 SV=1	GO:0005524//ATP binding;GO:0006096//glycolytic process;GO:0004618//phosphoglycerate kinase activity
Unigene27092_All	945	ko01100//Metabolic pathways;ko01110//Biosynthesis of secondary metabolites;ko00010//Glycolysis / Gluconeogenesis	Metabolism	Carbohydrate metabolism;Global and overview maps	-1.34738	5.82261e-88	5.20305e-89	K01792//glucose-6-phosphate 1-epimerase [EC:5.1.3.15]+ko00010//Glycolysis / Gluconeogenesis+ko01100//Metabolic pathways+ko01110//Biosynthesis of secondary metabolites	Aldose 1-epimerase		conserved carbohydrate binding protein [Ectocarpus siliculosus]	[G] KOG1594 Uncharacterized enzymes related to aldose 1-epimerase	Putative glucose-6-phosphate 1-epimerase OS=Cenchrus ciliaris PE=2 SV=1	GO:0030246//carbohydrate binding;GO:0047938//glucose-6-phosphate 1-epimerase activity;GO:0016853//isomerase activity;GO:0005975//carbohydrate metabolic process
Unigene496_All	998	ko00020//Citrate cycle (TCA cycle);ko00010//Glycolysis / Gluconeogenesis;ko01100//Metabolic pathways;ko00620//Pyruvate metabolism;ko01110//Biosynthesis of secondary metabolites;ko01200//Carbon metabolism	Metabolism	Global and overview maps;Carbohydrate metabolism	-1.38305	3.04736e-35	5.27459e-36	K10799//tankyrase [EC:2.4.2.30];K00627//pyruvate dehydrogenase E2 component (dihydrolipoamide acetyltransferase) [EC:2.3.1.12]+ko00010//Glycolysis / Gluconeogenesis+ko00020//Citrate cycle (TCA cycle)+ko01100//Metabolic pathways+ko01110//Biosynthesis of secondary metabolites+ko00620//Pyruvate metabolism+ko01200//Carbon metabolism;K00627//pyruvate dehydrogenase E2 component (dihydrolipoamide acetyl…	Tetratricopeptide repeat		hypothetical protein BU14_0066s0031 [Porphyra umbilicalis]	[TZ] KOG3671 Actin regulatory protein (Wiskott-Aldrich syndrome protein)	Formin-like protein 3 OS=Oryza sativa subsp. japonica GN=FH3 PE=2 SV=2
CL2046.Contig2_All	1491	ko00010//Glycolysis / Gluconeogenesis;ko01200//Carbon metabolism;ko00710//Carbon fixation in photosynthetic organisms;ko01100//Metabolic pathways;ko01110//Biosynthesis of secondary metabolites;ko01230//Biosynthesis of amino acids	Metabolism	Energy metabolism;Carbohydrate metabolism;Global and overview maps	-1.40295	0	0	K00927//phosphoglycerate kinase [EC:2.7.2.3]+ko00010//Glycolysis / Gluconeogenesis+ko01230//Biosynthesis of amino acids+ko01100//Metabolic pathways+ko01110//Biosynthesis of secondary metabolites+ko00710//Carbon fixation in photosynthetic organisms+ko01200//Carbon metabolism;K00927//phosphoglycerate kinase [EC:2.7.2.3]+ko00010//Glycolysis / Gluconeogenesis+ko01230//Biosynthesis of amino acids+ko01…	Phosphoglycerate kinase	XM_020352380.1 PREDICTED: Cajanus cajan phosphoglycerate kinase, cytosolic (LOC109792930), mRNA	PREDICTED: phosphoglycerate kinase, cytosolic [Fragaria vesca subsp. vesca]	[G] KOG1367 3-phosphoglycerate kinase	Phosphoglycerate kinase 3, cytosolic OS=Arabidopsis thaliana GN=PGK3 PE=1 SV=1	GO:0005524//ATP binding;GO:0006096//glycolytic process;GO:0004618//phosphoglycerate kinase activity
CL7257.Contig3_All	2802	ko01200//Carbon metabolism;ko00710//Carbon fixation in photosynthetic organisms;ko00020//Citrate cycle (TCA cycle);ko01100//Metabolic pathways;ko00620//Pyruvate metabolism;ko00010//Glycolysis / Gluconeogenesis;ko01110//Biosynthesis of secondary metabolites	Metabolism	Energy metabolism;Carbohydrate metabolism;Global and overview maps	-1.40821	0.000424406	0.000306487	K01610//phosphoenolpyruvate carboxykinase (ATP) [EC:4.1.1.49]+ko00010//Glycolysis / Gluconeogenesis+ko00020//Citrate cycle (TCA cycle)+ko01100//Metabolic pathways+ko01110//Biosynthesis of secondary metabolites+ko00710//Carbon fixation in photosynthetic organisms+ko00620//Pyruvate metabolism+ko01200//Carbon metabolism;K01610//phosphoenolpyruvate carboxykinase (ATP) [EC:4.1.1.49]+ko00010//Glycolysi…	Phosphoenolpyruvate carboxykinase		phosphoenolpyruvate carboxykinase [Nannochloropsis gaditana]	[C] TWOG0797 Phosphoenolpyruvate carboxykinase (ATP)	Phosphoenolpyruvate carboxykinase (ATP) OS=Arabidopsis thaliana GN=PCKA PE=1 SV=1	GO:0005524//ATP binding;GO:0006094//gluconeogenesis;GO:0016301//kinase activity;GO:0005829//cytosol;GO:0004612//phosphoenolpyruvate carboxykinase (ATP) activity
CL2568.Contig3_All	1287	ko01200//Carbon metabolism;ko00710//Carbon fixation in photosynthetic organisms;ko01100//Metabolic pathways;ko00010//Glycolysis / Gluconeogenesis;ko01230//Biosynthesis of amino acids;ko01110//Biosynthesis of secondary metabolites	Metabolism	Energy metabolism;Carbohydrate metabolism;Global and overview maps	-1.4339	0	0	K00134//glyceraldehyde 3-phosphate dehydrogenase [EC:1.2.1.12]+ko00010//Glycolysis / Gluconeogenesis+ko01230//Biosynthesis of amino acids+ko01100//Metabolic pathways+ko01110//Biosynthesis of secondary metabolites+ko00710//Carbon fixation in photosynthetic organisms+ko01200//Carbon metabolism;K00134//glyceraldehyde 3-phosphate dehydrogenase [EC:1.2.1.12]+ko00010//Glycolysis / Gluconeogenesis+ko012…	Glyceraldehyde 3-phosphate dehydrogenase, C-terminal domain	AF319448.1 Heterosigma akashiwo glyceraldehyde-3-phosphate dehydrogenase (GapC) gene, partial cds	glyceraldehyde-3-phosphate dehydrogenase, partial [Heterosigma akashiwo]	[G] KOG0657 Glyceraldehyde 3-phosphate dehydrogenase	Glyceraldehyde-3-phosphate dehydrogenase OS=Phytophthora infestans GN=GPDA PE=3 SV=1	GO:0006006//glucose metabolic process;GO:0050661//NADP binding;GO:0006096//glycolytic process;GO:0051287//NAD binding;GO:0004365//glyceraldehyde-3-phosphate dehydrogenase (NAD+) (phosphorylating) activity
Unigene45660_All	1806	ko01110//Biosynthesis of secondary metabolites;ko01200//Carbon metabolism;ko03018//RNA degradation;ko01100//Metabolic pathways;ko00010//Glycolysis / Gluconeogenesis;ko01230//Biosynthesis of amino acids	Genetic Information Processing;Metabolism	Global and overview maps;Folding, sorting and degradation;Carbohydrate metabolism	-1.49109	2.44959e-295	8.57247e-297	K01689//enolase [EC:4.2.1.11]+ko00010//Glycolysis / Gluconeogenesis+ko01230//Biosynthesis of amino acids+ko03018//RNA degradation+ko01100//Metabolic pathways+ko01110//Biosynthesis of secondary metabolites+ko01200//Carbon metabolism;K01689//enolase [EC:4.2.1.11]+ko00010//Glycolysis / Gluconeogenesis+ko01230//Biosynthesis of amino acids+ko03018//RNA degradation+ko01100//Metabolic pathways+ko01110//…	Enolase, C-terminal TIM barrel domain	AK354060.1 Hordeum vulgare subsp. vulgare mRNA for predicted protein, complete cds, clone: NIASHv1004L14	enolase [Nannochloropsis gaditana]	[G] KOG2670 Enolase	Enolase OS=Solanum lycopersicum GN=PGH1 PE=2 SV=1
CL10853.Contig1_All	1691	ko00260//Glycine, serine and threonine metabolism;ko01110//Biosynthesis of secondary metabolites;ko01200//Carbon metabolism;ko01100//Metabolic pathways;ko00010//Glycolysis / Gluconeogenesis;ko01230//Biosynthesis of amino acids	Metabolism	Global and overview maps;Carbohydrate metabolism;Amino acid metabolism	-1.50846	8.7762e-128	6.02077e-129	K01834//2,3-bisphosphoglycerate-dependent phosphoglycerate mutase [EC:5.4.2.11]+ko00010//Glycolysis / Gluconeogenesis+ko01230//Biosynthesis of amino acids+ko01100//Metabolic pathways+ko01110//Biosynthesis of secondary metabolites+ko00260//Glycine, serine and threonine metabolism+ko01200//Carbon metabolism;K01834//2,3-bisphosphoglycerate-dependent phosphoglycerate mutase [EC:5.4.2.11]+ko00010//Gly…	Histidine phosphatase superfamily (branch 1)		hypothetical protein PHYSODRAFT_360745 [Phytophthora sojae] >EGZ14412.1 hypothetical protein PHYSODRAFT_360745 [Phytophthora sojae]	[G] KOG0235 Phosphoglycerate mutase	Phosphoglycerate mutase-like protein 4 OS=Arabidopsis thaliana GN=At3g50520 PE=2 SV=1	GO:0004619//phosphoglycerate mutase activity;GO:0006096//glycolytic process
CL2869.Contig1_All	2173	ko00010//Glycolysis / Gluconeogenesis;ko01230//Biosynthesis of amino acids;ko01110//Biosynthesis of secondary metabolites;ko00051//Fructose and mannose metabolism;ko01100//Metabolic pathways;ko03018//RNA degradation;ko01200//Carbon metabolism;ko00052//Galactose metabolism;ko00030//Pentose phosphate pathway	Metabolism;Genetic Information Processing	Global and overview maps;Carbohydrate metabolism;Folding, sorting and degradation	-1.55464	1.84214e-203	8.69188e-205	K00850//6-phosphofructokinase 1 [EC:2.7.1.11]+ko00010//Glycolysis / Gluconeogenesis+ko00030//Pentose phosphate pathway+ko01230//Biosynthesis of amino acids+ko03018//RNA degradation+ko01100//Metabolic pathways+ko00052//Galactose metabolism+ko00051//Fructose and mannose metabolism+ko01110//Biosynthesis of secondary metabolites+ko01200//Carbon metabolism;K00850//6-phosphofructokinase 1 [EC:2.7.1.11]…	Phosphofructokinase		pyrophosphate-dependent phosphofructose kinase [Nannochloropsis gaditana]	[G] KOG2440 Pyrophosphate-dependent phosphofructo-1-kinase	ATP-dependent 6-phosphofructokinase 5, chloroplastic OS=Arabidopsis thaliana GN=PFK5 PE=1 SV=1	GO:0003872//6-phosphofructokinase activity;GO:0006002//fructose 6-phosphate metabolic process;GO:0005524//ATP binding;GO:0016021//integral component of membrane
CL10853.Contig2_All	2161	ko00260//Glycine, serine and threonine metabolism;ko01100//Metabolic pathways;ko01200//Carbon metabolism;ko01110//Biosynthesis of secondary metabolites;ko01230//Biosynthesis of amino acids;ko00010//Glycolysis / Gluconeogenesis	Metabolism	Carbohydrate metabolism;Amino acid metabolism;Global and overview maps	-1.56297	2.26015e-101	1.83147e-102	K01834//2,3-bisphosphoglycerate-dependent phosphoglycerate mutase [EC:5.4.2.11]+ko00010//Glycolysis / Gluconeogenesis+ko01230//Biosynthesis of amino acids+ko01100//Metabolic pathways+ko01110//Biosynthesis of secondary metabolites+ko00260//Glycine, serine and threonine metabolism+ko01200//Carbon metabolism;K01834//2,3-bisphosphoglycerate-dependent phosphoglycerate mutase [EC:5.4.2.11]+ko00010//Gly…	Histidine phosphatase superfamily (branch 1)		hypothetical protein PHYSODRAFT_360745 [Phytophthora sojae] >EGZ14412.1 hypothetical protein PHYSODRAFT_360745 [Phytophthora sojae]	[G] KOG0235 Phosphoglycerate mutase	Phosphoglycerate mutase-like protein 4 OS=Arabidopsis thaliana GN=At3g50520 PE=2 SV=1	GO:0004619//phosphoglycerate mutase activity;GO:0006096//glycolytic process
Unigene44554_All	3214	ko00500//Starch and sucrose metabolism;ko00052//Galactose metabolism;ko00010//Glycolysis / Gluconeogenesis;ko01100//Metabolic pathways;ko00230//Purine metabolism;ko01110//Biosynthesis of secondary metabolites;ko00520//Amino sugar and nucleotide sugar metabolism;ko00030//Pentose phosphate pathway	Metabolism	Carbohydrate metabolism;Global and overview maps;Nucleotide metabolism	-1.63885	4.84475e-135	3.19114e-136	K01835//phosphoglucomutase [EC:5.4.2.2]+ko00010//Glycolysis / Gluconeogenesis+ko00230//Purine metabolism+ko00030//Pentose phosphate pathway+ko00520//Amino sugar and nucleotide sugar metabolism+ko01100//Metabolic pathways+ko00052//Galactose metabolism+ko00500//Starch and sucrose metabolism+ko01110//Biosynthesis of secondary metabolites;K01835//phosphoglucomutase [EC:5.4.2.2]+ko00010//Glycolysis / …	UTP--glucose-1-phosphate uridylyltransferase	BT031992.1 Phytophthora capsici clone CBOT113-C24 mRNA sequence	phosphoglucomutase [Nannochloropsis gaditana]	[G] KOG0625 Phosphoglucomutase	Phosphoglucomutase, cytoplasmic OS=Populus tremula GN=PGM1 PE=2 SV=1
CL9215.Contig2_All	1888	ko00620//Pyruvate metabolism;ko01200//Carbon metabolism;ko00010//Glycolysis / Gluconeogenesis;ko00640//Propanoate metabolism;ko00630//Glyoxylate and dicarboxylate metabolism;ko01110//Biosynthesis of secondary metabolites;ko01100//Metabolic pathways	Metabolism	Carbohydrate metabolism;Global and overview maps	-1.64366	3.11053e-15	9.50852e-16	K01895//acetyl-CoA synthetase [EC:6.2.1.1]+ko00010//Glycolysis / Gluconeogenesis+ko00640//Propanoate metabolism+ko01100//Metabolic pathways+ko01110//Biosynthesis of secondary metabolites+ko00620//Pyruvate metabolism+ko01200//Carbon metabolism+ko00630//Glyoxylate and dicarboxylate metabolism;K01895//acetyl-CoA synthetase [EC:6.2.1.1]+ko00010//Glycolysis / Gluconeogenesis+ko00640//Propanoate metabo…	AMP-binding enzyme	XM_005771870.1 Emiliania huxleyi CCMP1516 acetyl-CoA synthetase partial mRNA	AMP-dependent synthetase and ligase [Fragilariopsis cylindrus CCMP1102]	[I] KOG1175 Acyl-CoA synthetase	Acetyl-coenzyme A synthetase, chloroplastic/glyoxysomal OS=Arabidopsis thaliana GN=ACS PE=1 SV=1	GO:0008152//metabolic process;GO:0003824//catalytic activity
Unigene22078_All	1572	ko01100//Metabolic pathways;ko00310//Lysine degradation;ko01110//Biosynthesis of secondary metabolites;ko00620//Pyruvate metabolism;ko00010//Glycolysis / Gluconeogenesis;ko00020//Citrate cycle (TCA cycle);ko01200//Carbon metabolism	Metabolism	Global and overview maps;Carbohydrate metabolism;Amino acid metabolism	-1.67708	1.35708e-26	2.85141e-27	K00627//pyruvate dehydrogenase E2 component (dihydrolipoamide acetyltransferase) [EC:2.3.1.12]+ko00010//Glycolysis / Gluconeogenesis+ko00020//Citrate cycle (TCA cycle)+ko01100//Metabolic pathways+ko01110//Biosynthesis of secondary metabolites+ko00620//Pyruvate metabolism+ko01200//Carbon metabolism;K00627//pyruvate dehydrogenase E2 component (dihydrolipoamide acetyltransferase) [EC:2.3.1.12]+ko000…	2-oxoacid dehydrogenases acyltransferase (catalytic domain)		hypothetical protein L917_15989 [Phytophthora parasitica]	[C] KOG0558 Dihydrolipoamide transacylase (alpha-keto acid dehydrogenase E2 subunit)	Dihydrolipoyllysine-residue acetyltransferase component 2 of pyruvate dehydrogenase complex, mitochondrial OS=Arabidopsis thaliana GN=At3g13930 PE=1 SV=2
Unigene22020_All	1596	ko00280//Valine, leucine and isoleucine degradation;ko00071//Fatty acid degradation;ko00330//Arginine and proline metabolism;ko00561//Glycerolipid metabolism;ko00903//Limonene and pinene degradation;ko00410//beta-Alanine metabolism;ko00940//Phenylpropanoid biosynthesis;ko01110//Biosynthesis of secondary metabolites;ko00053//Ascorbate and aldarate metabolism;ko01100//Metabolic pathways;ko00310//Ly…	Metabolism	Biosynthesis of other secondary metabolites;Metabolism of terpenoids and polyketides;Amino acid metabolism;Carbohydrate metabolism;Lipid metabolism;Metabolism of other amino acids;Global and overview maps	-1.68517	2.37735e-14	7.55895e-15	K00294//1-pyrroline-5-carboxylate dehydrogenase [EC:1.2.1.88]+ko00250//Alanine, aspartate and glutamate metabolism+ko00330//Arginine and proline metabolism+ko01100//Metabolic pathways;K00294//1-pyrroline-5-carboxylate dehydrogenase [EC:1.2.1.88]+ko00250//Alanine, aspartate and glutamate metabolism+ko00330//Arginine and proline metabolism+ko01100//Metabolic pathways;K12355//coniferyl-aldehyde dehy…	Aldehyde dehydrogenase family		1-pyrroline-5-carboxylate dehydrogenase [Galdieria sulphuraria] >EME28745.1 1-pyrroline-5-carboxylate dehydrogenase [Galdieria sulphuraria]	[E] KOG2455 Delta-1-pyrroline-5-carboxylate dehydrogenase	Betaine aldehyde dehydrogenase 2 OS=Oryza sativa subsp. japonica GN=BADH2 PE=1 SV=1	GO:0004657//proline dehydrogenase activity;GO:0010133//proline catabolic process to glutamate;GO:0003700//DNA binding transcription factor activity;GO:0003842//1-pyrroline-5-carboxylate dehydrogenase activity;GO:0004029//aldehyde dehydrogenase (NAD) activity
Unigene655_All	1389	ko00562//Inositol phosphate metabolism;ko01110//Biosynthesis of secondary metabolites;ko00051//Fructose and mannose metabolism;ko00010//Glycolysis / Gluconeogenesis;ko01230//Biosynthesis of amino acids;ko00710//Carbon fixation in photosynthetic organisms;ko01200//Carbon metabolism;ko01100//Metabolic pathways	Metabolism	Energy metabolism;Global and overview maps;Carbohydrate metabolism	-1.71558	3.2117e-09	1.36295e-09	K01803//triosephosphate isomerase (TIM) [EC:5.3.1.1]+ko00010//Glycolysis / Gluconeogenesis+ko01230//Biosynthesis of amino acids+ko01100//Metabolic pathways+ko00051//Fructose and mannose metabolism+ko01110//Biosynthesis of secondary metabolites+ko00710//Carbon fixation in photosynthetic organisms+ko01200//Carbon metabolism+ko00562//Inositol phosphate metabolism;K01803//triosephosphate isomerase (T…	Triosephosphate isomerase		triosephosphate isomerase, partial [Phacus inflexus]	[G] KOG1643 Triosephosphate isomerase	Triosephosphate isomerase, cytosolic OS=Coptis japonica PE=2 SV=1
CL2568.Contig2_All	1771	ko01200//Carbon metabolism;ko00710//Carbon fixation in photosynthetic organisms;ko01110//Biosynthesis of secondary metabolites;ko01100//Metabolic pathways;ko01230//Biosynthesis of amino acids;ko00010//Glycolysis / Gluconeogenesis	Metabolism	Carbohydrate metabolism;Energy metabolism;Global and overview maps	-1.71812	0	0	K00134//glyceraldehyde 3-phosphate dehydrogenase [EC:1.2.1.12]+ko00010//Glycolysis / Gluconeogenesis+ko01230//Biosynthesis of amino acids+ko01100//Metabolic pathways+ko01110//Biosynthesis of secondary metabolites+ko00710//Carbon fixation in photosynthetic organisms+ko01200//Carbon metabolism;K00134//glyceraldehyde 3-phosphate dehydrogenase [EC:1.2.1.12]+ko00010//Glycolysis / Gluconeogenesis+ko012…	Glyceraldehyde 3-phosphate dehydrogenase, C-terminal domain	AF319448.1 Heterosigma akashiwo glyceraldehyde-3-phosphate dehydrogenase (GapC) gene, partial cds	glyceraldehyde-3-phosphate dehydrogenase, partial [Heterosigma akashiwo]	[G] KOG0657 Glyceraldehyde 3-phosphate dehydrogenase	Glyceraldehyde-3-phosphate dehydrogenase OS=Phytophthora infestans GN=GPDA PE=3 SV=1	GO:0006006//glucose metabolic process;GO:0050661//NADP binding;GO:0006096//glycolytic process;GO:0051287//NAD binding;GO:0004365//glyceraldehyde-3-phosphate dehydrogenase (NAD+) (phosphorylating) activity
Unigene33331_All	3508	ko00030//Pentose phosphate pathway;ko01100//Metabolic pathways;ko00051//Fructose and mannose metabolism;ko00010//Glycolysis / Gluconeogenesis;ko01110//Biosynthesis of secondary metabolites	Metabolism	Global and overview maps;Carbohydrate metabolism	-1.75394	1.64439e-209	7.58684e-211	K00895//diphosphate-dependent phosphofructokinase [EC:2.7.1.90]+ko00010//Glycolysis / Gluconeogenesis+ko00030//Pentose phosphate pathway+ko01100//Metabolic pathways+ko00051//Fructose and mannose metabolism+ko01110//Biosynthesis of secondary metabolites;K00895//diphosphate-dependent phosphofructokinase [EC:2.7.1.90]+ko00010//Glycolysis / Gluconeogenesis+ko00030//Pentose phosphate pathway+ko01100//…	Phosphofructokinase		pyrophosphate--fructose 6-phosphate 1-phosphotransferase subunit beta [Nannochloropsis gaditana]	[G] KOG2440 Pyrophosphate-dependent phosphofructo-1-kinase	Pyrophosphate--fructose 6-phosphate 1-phosphotransferase subunit beta 1 OS=Arabidopsis thaliana GN=PFP-BETA1 PE=1 SV=1	GO:0046872//metal ion binding;GO:0003872//6-phosphofructokinase activity;GO:0006002//fructose 6-phosphate metabolic process;GO:0005524//ATP binding;GO:0047334//diphosphate-fructose-6-phosphate 1-phosphotransferase activity;GO:0005737//cytoplasm
Unigene44850_All	1595	ko00520//Amino sugar and nucleotide sugar metabolism;ko00500//Starch and sucrose metabolism;ko00010//Glycolysis / Gluconeogenesis;ko00230//Purine metabolism;ko00052//Galactose metabolism;ko01100//Metabolic pathways;ko01110//Biosynthesis of secondary metabolites;ko00030//Pentose phosphate pathway	Metabolism	Carbohydrate metabolism;Global and overview maps;Nucleotide metabolism	-1.77465	1.94592e-14	6.15941e-15	K01835//phosphoglucomutase [EC:5.4.2.2]+ko00010//Glycolysis / Gluconeogenesis+ko00230//Purine metabolism+ko00030//Pentose phosphate pathway+ko00520//Amino sugar and nucleotide sugar metabolism+ko01100//Metabolic pathways+ko00052//Galactose metabolism+ko00500//Starch and sucrose metabolism+ko01110//Biosynthesis of secondary metabolites;K15779//phosphoglucomutase / phosphopentomutase [EC:5.4.2.2 5.…	Phosphoglucomutase/phosphomannomutase, alpha/beta/alpha domain I		hypothetical protein JH06_1030 [Blastocystis sp. subtype 4] >KNB45321.1 hypothetical protein JH06_1030 [Blastocystis sp. subtype 4]	[G] KOG1220 Phosphoglucomutase/phosphomannomutase		GO:0000287//magnesium ion binding;GO:0005975//carbohydrate metabolic process;GO:0016868//intramolecular transferase activity, phosphotransferases
CL2608.Contig2_All	2898	ko01100//Metabolic pathways;ko01110//Biosynthesis of secondary metabolites;ko00280//Valine, leucine and isoleucine degradation;ko00260//Glycine, serine and threonine metabolism;ko00640//Propanoate metabolism;ko00010//Glycolysis / Gluconeogenesis;ko01200//Carbon metabolism;ko00630//Glyoxylate and dicarboxylate metabolism;ko00020//Citrate cycle (TCA cycle);ko00620//Pyruvate metabolism	Metabolism	Amino acid metabolism;Carbohydrate metabolism;Global and overview maps	-1.77532	3.89437e-23	8.94317e-24	K00382//dihydrolipoamide dehydrogenase [EC:1.8.1.4]+ko00010//Glycolysis / Gluconeogenesis+ko00020//Citrate cycle (TCA cycle)+ko00280//Valine, leucine and isoleucine degradation+ko00640//Propanoate metabolism+ko01100//Metabolic pathways+ko01110//Biosynthesis of secondary metabolites+ko00260//Glycine, serine and threonine metabolism+ko00620//Pyruvate metabolism+ko01200//Carbon metabolism+ko00630//G…	Protein of unknown function (DUF1572)		hypothetical protein TSUD_199460 [Trifolium subterraneum]	[C] KOG1335 Dihydrolipoamide dehydrogenase	Dihydrolipoyl dehydrogenase, mitochondrial OS=Pisum sativum GN=LPD PE=1 SV=2	GO:0009055//electron transfer activity;GO:0005759//mitochondrial matrix;GO:0004148//dihydrolipoyl dehydrogenase activity;GO:0048046//apoplast;GO:0005524//ATP binding;GO:0050660//flavin adenine dinucleotide binding;GO:0045454//cell redox homeostasis;GO:0050897//cobalt ion binding;GO:0046686//response to cadmium ion;GO:0005747//mitochondrial respiratory chain complex I;GO:0005623//cell;GO:0005507//…
CL636.Contig2_All	1107	ko00620//Pyruvate metabolism;ko00910//Nitrogen metabolism;ko00010//Glycolysis / Gluconeogenesis;ko00020//Citrate cycle (TCA cycle);ko01100//Metabolic pathways;ko01200//Carbon metabolism;ko01110//Biosynthesis of secondary metabolites	Metabolism	Carbohydrate metabolism;Energy metabolism;Global and overview maps	-1.84486	0.0002321	0.000160769	K00627//pyruvate dehydrogenase E2 component (dihydrolipoamide acetyltransferase) [EC:2.3.1.12]+ko00010//Glycolysis / Gluconeogenesis+ko00020//Citrate cycle (TCA cycle)+ko01100//Metabolic pathways+ko01110//Biosynthesis of secondary metabolites+ko00620//Pyruvate metabolism+ko01200//Carbon metabolism;K00627//pyruvate dehydrogenase E2 component (dihydrolipoamide acetyltransferase) [EC:2.3.1.12]+ko000…	Biotin-requiring enzyme		Cap-specific mRNA (nucleoside-2'-O-)-methyltransferase 1 [Symbiodinium microadriaticum]	[T] KOG4743 Cyclin-dependent kinase inhibitor	Myrosinase-binding protein 2 OS=Arabidopsis thaliana GN=MBP2 PE=2 SV=1	GO:0005524//ATP binding;GO:0004672//protein kinase activity
Unigene31068_All	1669	ko00030//Pentose phosphate pathway;ko01200//Carbon metabolism;ko00500//Starch and sucrose metabolism;ko01100//Metabolic pathways;ko00520//Amino sugar and nucleotide sugar metabolism;ko01110//Biosynthesis of secondary metabolites;ko00010//Glycolysis / Gluconeogenesis	Metabolism	Carbohydrate metabolism;Global and overview maps	-1.86222	4.55485e-08	2.10527e-08	K01810//glucose-6-phosphate isomerase [EC:5.3.1.9]+ko00010//Glycolysis / Gluconeogenesis+ko00030//Pentose phosphate pathway+ko00520//Amino sugar and nucleotide sugar metabolism+ko01100//Metabolic pathways+ko00500//Starch and sucrose metabolism+ko01110//Biosynthesis of secondary metabolites+ko01200//Carbon metabolism;K01810//glucose-6-phosphate isomerase [EC:5.3.1.9]+ko00010//Glycolysis / Gluconeo…	Phosphoglucose isomerase		putative glucose-6-phosphate isomerase [Fragilariopsis cylindrus CCMP1102]	[G] KOG2446 Glucose-6-phosphate isomerase	Glucose-6-phosphate isomerase, cytosolic OS=Arabidopsis thaliana GN=PGIC PE=1 SV=1	GO:0004347//glucose-6-phosphate isomerase activity;GO:0006094//gluconeogenesis;GO:0006096//glycolytic process
CL7257.Contig10_All	2552	ko01200//Carbon metabolism;ko00010//Glycolysis / Gluconeogenesis;ko00710//Carbon fixation in photosynthetic organisms;ko00020//Citrate cycle (TCA cycle);ko01110//Biosynthesis of secondary metabolites;ko01100//Metabolic pathways;ko00620//Pyruvate metabolism	Metabolism	Energy metabolism;Carbohydrate metabolism;Global and overview maps	-1.91368	0	0	K01610//phosphoenolpyruvate carboxykinase (ATP) [EC:4.1.1.49]+ko00010//Glycolysis / Gluconeogenesis+ko00020//Citrate cycle (TCA cycle)+ko01100//Metabolic pathways+ko01110//Biosynthesis of secondary metabolites+ko00710//Carbon fixation in photosynthetic organisms+ko00620//Pyruvate metabolism+ko01200//Carbon metabolism;K01610//phosphoenolpyruvate carboxykinase (ATP) [EC:4.1.1.49]+ko00010//Glycolysi…	Phosphoenolpyruvate carboxykinase		phosphoenolpyruvate carboxykinase [Nannochloropsis gaditana]	[C] TWOG0797 Phosphoenolpyruvate carboxykinase (ATP)	Phosphoenolpyruvate carboxykinase (ATP) OS=Arabidopsis thaliana GN=PCKA PE=1 SV=1	GO:0005524//ATP binding;GO:0006094//gluconeogenesis;GO:0016301//kinase activity;GO:0005829//cytosol;GO:0004612//phosphoenolpyruvate carboxykinase (ATP) activity
Unigene30740_All	1155	ko01100//Metabolic pathways;ko00260//Glycine, serine and threonine metabolism;ko00010//Glycolysis / Gluconeogenesis;ko01200//Carbon metabolism;ko01110//Biosynthesis of secondary metabolites;ko01230//Biosynthesis of amino acids	Metabolism	Global and overview maps;Amino acid metabolism;Carbohydrate metabolism	-1.92499	1.9971e-149	1.21825e-150	K15634//probable phosphoglycerate mutase [EC:5.4.2.12]+ko00010//Glycolysis / Gluconeogenesis+ko01230//Biosynthesis of amino acids+ko01100//Metabolic pathways+ko01110//Biosynthesis of secondary metabolites+ko00260//Glycine, serine and threonine metabolism+ko01200//Carbon metabolism	Histidine phosphatase superfamily (branch 1)		fructose-2,6-bisphosphatase [Ectocarpus siliculosus]	[G] KOG0235 Phosphoglycerate mutase		GO:0008152//metabolic process;GO:0003824//catalytic activity
Unigene3951_All	2576	ko01100//Metabolic pathways;ko01110//Biosynthesis of secondary metabolites;ko00010//Glycolysis / Gluconeogenesis;ko00020//Citrate cycle (TCA cycle);ko00620//Pyruvate metabolism;ko01200//Carbon metabolism	Metabolism	Carbohydrate metabolism;Global and overview maps	-1.98779	3.82292e-59	4.58099e-60	K00161//pyruvate dehydrogenase E1 component alpha subunit [EC:1.2.4.1]+ko00010//Glycolysis / Gluconeogenesis+ko00020//Citrate cycle (TCA cycle)+ko01100//Metabolic pathways+ko01110//Biosynthesis of secondary metabolites+ko00620//Pyruvate metabolism+ko01200//Carbon metabolism;K00161//pyruvate dehydrogenase E1 component alpha subunit [EC:1.2.4.1]+ko00010//Glycolysis / Gluconeogenesis+ko00020//Citrat…	Dehydrogenase E1 component	XM_009037186.1 Aureococcus anophagefferens hypothetical protein mRNA	pyruvate dehydrogenase e1 component alpha subunit [Nannochloropsis gaditana]	[C] KOG0225 Pyruvate dehydrogenase E1, alpha subunit	Pyruvate dehydrogenase E1 component subunit alpha-2, mitochondrial OS=Arabidopsis thaliana GN=IAR4 PE=1 SV=2	GO:0043231//intracellular membrane-bounded organelle;GO:0004739//pyruvate dehydrogenase (acetyl-transferring) activity;GO:0006086//acetyl-CoA biosynthetic process from pyruvate
Unigene4539_All	3242	ko00010//Glycolysis / Gluconeogenesis;ko00020//Citrate cycle (TCA cycle);ko00620//Pyruvate metabolism;ko01200//Carbon metabolism;ko01100//Metabolic pathways;ko01110//Biosynthesis of secondary metabolites	Metabolism	Carbohydrate metabolism;Global and overview maps	-2.0248	0	0	K00161//pyruvate dehydrogenase E1 component alpha subunit [EC:1.2.4.1]+ko00010//Glycolysis / Gluconeogenesis+ko00020//Citrate cycle (TCA cycle)+ko01100//Metabolic pathways+ko01110//Biosynthesis of secondary metabolites+ko00620//Pyruvate metabolism+ko01200//Carbon metabolism;K00161//pyruvate dehydrogenase E1 component alpha subunit [EC:1.2.4.1]+ko00010//Glycolysis / Gluconeogenesis+ko00020//Citrat…	Dehydrogenase E1 component	XM_009037186.1 Aureococcus anophagefferens hypothetical protein mRNA	pyruvate dehydrogenase e1 component alpha subunit [Nannochloropsis gaditana]	[C] KOG0225 Pyruvate dehydrogenase E1, alpha subunit	Pyruvate dehydrogenase E1 component subunit alpha-2, mitochondrial OS=Arabidopsis thaliana GN=IAR4 PE=1 SV=2	GO:0043231//intracellular membrane-bounded organelle;GO:0004739//pyruvate dehydrogenase (acetyl-transferring) activity;GO:0006086//acetyl-CoA biosynthetic process from pyruvate
Unigene40805_All	2455	ko01100//Metabolic pathways;ko01110//Biosynthesis of secondary metabolites;ko00020//Citrate cycle (TCA cycle);ko00620//Pyruvate metabolism;ko00010//Glycolysis / Gluconeogenesis;ko01200//Carbon metabolism	Metabolism	Carbohydrate metabolism;Global and overview maps	-2.12375	7.96505e-45	1.15534e-45	K00162//pyruvate dehydrogenase E1 component beta subunit [EC:1.2.4.1]+ko00010//Glycolysis / Gluconeogenesis+ko00020//Citrate cycle (TCA cycle)+ko01100//Metabolic pathways+ko01110//Biosynthesis of secondary metabolites+ko00620//Pyruvate metabolism+ko01200//Carbon metabolism;K00162//pyruvate dehydrogenase E1 component beta subunit [EC:1.2.4.1]+ko00010//Glycolysis / Gluconeogenesis+ko00020//Citrate …	Dehydrogenase E1 component		PREDICTED: pyruvate dehydrogenase E1 component subunit beta-like [Nelumbo nucifera]	[C] KOG0525 Branched chain alpha-keto acid dehydrogenase E1, beta subunit	Pyruvate dehydrogenase E1 component subunit beta-3, chloroplastic OS=Oryza sativa subsp. japonica GN=Os12g0616900 PE=2 SV=1	GO:0008152//metabolic process;GO:0003824//catalytic activity
Unigene45428_All	1621	ko00330//Arginine and proline metabolism;ko00620//Pyruvate metabolism;ko00053//Ascorbate and aldarate metabolism;ko00260//Glycine, serine and threonine metabolism;ko00410//beta-Alanine metabolism;ko01110//Biosynthesis of secondary metabolites;ko00340//Histidine metabolism;ko00380//Tryptophan metabolism;ko00280//Valine, leucine and isoleucine degradation;ko00310//Lysine degradation;ko00561//Glycer…	Metabolism	Global and overview maps;Lipid metabolism;Carbohydrate metabolism;Metabolism of other amino acids;Amino acid metabolism	-2.1823	3.34203e-24	7.44621e-25	K14085//aldehyde dehydrogenase family 7 member A1 [EC:1.2.1.31 1.2.1.8 1.2.1.3]+ko00410//beta-Alanine metabolism+ko00310//Lysine degradation+ko00010//Glycolysis / Gluconeogenesis+ko00380//Tryptophan metabolism+ko00330//Arginine and proline metabolism+ko00280//Valine, leucine and isoleucine degradation+ko01100//Metabolic pathways+ko00053//Ascorbate and aldarate metabolism+ko00340//Histidine metabo…	Aldehyde dehydrogenase family		aldehyde dehydrogenase (NAD+) [Galdieria sulphuraria] >EME27689.1 aldehyde dehydrogenase (NAD+) [Galdieria sulphuraria]	[C] KOG2453 Aldehyde dehydrogenase	Aldehyde dehydrogenase family 7 member A1 OS=Malus domestica PE=1 SV=3	GO:0005829//cytosol;GO:0009651//response to salt stress;GO:0009269//response to desiccation;GO:0009737//response to abscisic acid;GO:0004029//aldehyde dehydrogenase (NAD) activity
Unigene36954_All	8503	ko00620//Pyruvate metabolism;ko00010//Glycolysis / Gluconeogenesis;ko00020//Citrate cycle (TCA cycle);ko01200//Carbon metabolism;ko01100//Metabolic pathways;ko01110//Biosynthesis of secondary metabolites	Metabolism	Carbohydrate metabolism;Global and overview maps	-2.18687	4.29095e-205	2.01082e-206	K00627//pyruvate dehydrogenase E2 component (dihydrolipoamide acetyltransferase) [EC:2.3.1.12]+ko00010//Glycolysis / Gluconeogenesis+ko00020//Citrate cycle (TCA cycle)+ko01100//Metabolic pathways+ko01110//Biosynthesis of secondary metabolites+ko00620//Pyruvate metabolism+ko01200//Carbon metabolism;K00627//pyruvate dehydrogenase E2 component (dihydrolipoamide acetyltransferase) [EC:2.3.1.12]+ko000…	Dehydrogenase E1 component		uncharacterized protein A4U43_C08F340 [Asparagus officinalis]	[C] KOG0557 Dihydrolipoamide acetyltransferase	Pyruvate dehydrogenase E1 component subunit alpha-3, chloroplastic OS=Oryza sativa subsp. japonica GN=Os04g0119400 PE=2 SV=2	GO:0005759//mitochondrial matrix;GO:0004742//dihydrolipoyllysine-residue acetyltransferase activity;GO:0006090//pyruvate metabolic process;GO:0045254//pyruvate dehydrogenase complex
Unigene27812_All	1537	ko01110//Biosynthesis of secondary metabolites;ko00010//Glycolysis / Gluconeogenesis;ko00260//Glycine, serine and threonine metabolism;ko00630//Glyoxylate and dicarboxylate metabolism;ko00020//Citrate cycle (TCA cycle);ko00620//Pyruvate metabolism;ko01200//Carbon metabolism;ko01100//Metabolic pathways;ko00280//Valine, leucine and isoleucine degradation;ko00640//Propanoate metabolism	Metabolism	Carbohydrate metabolism;Amino acid metabolism;Global and overview maps	-2.20433	1.24831e-21	2.99796e-22	K00382//dihydrolipoamide dehydrogenase [EC:1.8.1.4]+ko00010//Glycolysis / Gluconeogenesis+ko00020//Citrate cycle (TCA cycle)+ko00280//Valine, leucine and isoleucine degradation+ko00640//Propanoate metabolism+ko01100//Metabolic pathways+ko01110//Biosynthesis of secondary metabolites+ko00260//Glycine, serine and threonine metabolism+ko00620//Pyruvate metabolism+ko01200//Carbon metabolism+ko00630//G…	Pyridine nucleotide-disulphide oxidoreductase		hypothetical protein AXG93_2015s1160 [Marchantia polymorpha subsp. ruderalis]	[C] KOG1335 Dihydrolipoamide dehydrogenase	Dihydrolipoyl dehydrogenase, mitochondrial OS=Pisum sativum GN=LPD PE=1 SV=2	GO:0009055//electron transfer activity;GO:0004148//dihydrolipoyl dehydrogenase activity;GO:0005623//cell;GO:0050660//flavin adenine dinucleotide binding;GO:0045454//cell redox homeostasis
Unigene665_All	1470	ko00010//Glycolysis / Gluconeogenesis;ko01100//Metabolic pathways;ko00051//Fructose and mannose metabolism;ko00030//Pentose phosphate pathway;ko01110//Biosynthesis of secondary metabolites;ko01200//Carbon metabolism;ko00710//Carbon fixation in photosynthetic organisms	Metabolism	Energy metabolism;Carbohydrate metabolism;Global and overview maps	-2.32986	5.03326e-15	1.54964e-15	K03841//fructose-1,6-bisphosphatase I [EC:3.1.3.11]+ko00010//Glycolysis / Gluconeogenesis+ko00030//Pentose phosphate pathway+ko01100//Metabolic pathways+ko00051//Fructose and mannose metabolism+ko01110//Biosynthesis of secondary metabolites+ko00710//Carbon fixation in photosynthetic organisms+ko01200//Carbon metabolism;K03841//fructose-1,6-bisphosphatase I [EC:3.1.3.11]+ko00010//Glycolysis / Gluc…	Fructose-1-6-bisphosphatase, N-terminal domain		fructose-1,6-bisphosphatase, cytosolic-like protein [Medicago truncatula] >AES63372.1 fructose-1,6-bisphosphatase, cytosolic-like protein [Medicago truncatula]	[G] KOG1458 Fructose-1,6-bisphosphatase	Fructose-1,6-bisphosphatase, cytosolic OS=Spinacia oleracea PE=1 SV=2	GO:0005975//carbohydrate metabolic process;GO:0042132//fructose 1,6-bisphosphate 1-phosphatase activity
Unigene13659_All	2798	ko00630//Glyoxylate and dicarboxylate metabolism;ko00010//Glycolysis / Gluconeogenesis;ko00260//Glycine, serine and threonine metabolism;ko01200//Carbon metabolism;ko00020//Citrate cycle (TCA cycle);ko01100//Metabolic pathways;ko01110//Biosynthesis of secondary metabolites;ko00280//Valine, leucine and isoleucine degradation;ko00640//Propanoate metabolism;ko00620//Pyruvate metabolism	Metabolism	Amino acid metabolism;Global and overview maps;Carbohydrate metabolism	-2.38437	1.36765e-179	7.16549e-181	K00382//dihydrolipoamide dehydrogenase [EC:1.8.1.4]+ko00010//Glycolysis / Gluconeogenesis+ko00020//Citrate cycle (TCA cycle)+ko00280//Valine, leucine and isoleucine degradation+ko00640//Propanoate metabolism+ko01100//Metabolic pathways+ko01110//Biosynthesis of secondary metabolites+ko00260//Glycine, serine and threonine metabolism+ko00620//Pyruvate metabolism+ko01200//Carbon metabolism+ko00630//G…	Pyridine nucleotide-disulphide oxidoreductase	AB182315.1 Heterosigma akashiwo DNA, fragment RA7577N5500.1	mercuric reductase [Ectocarpus siliculosus]	[C] KOG1335 Dihydrolipoamide dehydrogenase	Leghemoglobin reductase OS=Vigna unguiculata GN=FLBR PE=1 SV=1	GO:0009055//electron transfer activity;GO:0005623//cell;GO:0050660//flavin adenine dinucleotide binding;GO:0016021//integral component of membrane;GO:0016668//oxidoreductase activity, acting on a sulfur group of donors, NAD(P) as acceptor;GO:0045454//cell redox homeostasis;GO:0016491//oxidoreductase activity
CL2869.Contig2_All	2147	ko00010//Glycolysis / Gluconeogenesis;ko00051//Fructose and mannose metabolism;ko00052//Galactose metabolism;ko03018//RNA degradation;ko01100//Metabolic pathways;ko01230//Biosynthesis of amino acids;ko01200//Carbon metabolism;ko01110//Biosynthesis of secondary metabolites;ko00030//Pentose phosphate pathway	Metabolism;Genetic Information Processing	Global and overview maps;Folding, sorting and degradation;Carbohydrate metabolism	-2.39445	1.00427e-33	1.79643e-34	K00850//6-phosphofructokinase 1 [EC:2.7.1.11]+ko00010//Glycolysis / Gluconeogenesis+ko00030//Pentose phosphate pathway+ko01230//Biosynthesis of amino acids+ko03018//RNA degradation+ko01100//Metabolic pathways+ko00052//Galactose metabolism+ko00051//Fructose and mannose metabolism+ko01110//Biosynthesis of secondary metabolites+ko01200//Carbon metabolism;K00850//6-phosphofructokinase 1 [EC:2.7.1.11]…	Phosphofructokinase		pyrophosphate-dependent phosphofructose kinase [Nannochloropsis gaditana]	[G] KOG2440 Pyrophosphate-dependent phosphofructo-1-kinase	ATP-dependent 6-phosphofructokinase 5, chloroplastic OS=Arabidopsis thaliana GN=PFK5 PE=1 SV=1	GO:0003872//6-phosphofructokinase activity;GO:0006002//fructose 6-phosphate metabolic process;GO:0005524//ATP binding;GO:0016021//integral component of membrane
Unigene16457_All	1009	ko01100//Metabolic pathways;ko01110//Biosynthesis of secondary metabolites;ko01230//Biosynthesis of amino acids;ko00260//Glycine, serine and threonine metabolism;ko00010//Glycolysis / Gluconeogenesis;ko01200//Carbon metabolism	Metabolism	Global and overview maps;Carbohydrate metabolism;Amino acid metabolism	-2.5924	6.6422e-09	2.88101e-09	K15633//2,3-bisphosphoglycerate-independent phosphoglycerate mutase [EC:5.4.2.12]+ko00010//Glycolysis / Gluconeogenesis+ko01230//Biosynthesis of amino acids+ko01100//Metabolic pathways+ko01110//Biosynthesis of secondary metabolites+ko00260//Glycine, serine and threonine metabolism+ko01200//Carbon metabolism;K15633//2,3-bisphosphoglycerate-independent phosphoglycerate mutase [EC:5.4.2.12]+ko00010/…	BPG-independent PGAM N-terminus (iPGM_N)		phosphoglyceromutase (plastid) [Paulinella micropora]	[G] KOG4513 Phosphoglycerate mutase	2,3-bisphosphoglycerate-independent phosphoglycerate mutase OS=Porphyra purpurea GN=gpmI PE=3 SV=1	GO:0046537//2,3-bisphosphoglycerate-independent phosphoglycerate mutase activity;GO:0006007//glucose catabolic process;GO:0004619//phosphoglycerate mutase activity;GO:0006096//glycolytic process;GO:0009536//plastid;GO:0005737//cytoplasm;GO:0030145//manganese ion binding
Unigene20219_All	659	ko00620//Pyruvate metabolism;ko00410//beta-Alanine metabolism;ko00280//Valine, leucine and isoleucine degradation;ko00310//Lysine degradation;ko00071//Fatty acid degradation;ko01110//Biosynthesis of secondary metabolites;ko00053//Ascorbate and aldarate metabolism;ko01100//Metabolic pathways;ko00561//Glycerolipid metabolism;ko00010//Glycolysis / Gluconeogenesis;ko00380//Tryptophan metabolism;ko003…	Metabolism	Metabolism of other amino acids;Carbohydrate metabolism;Metabolism of terpenoids and polyketides;Amino acid metabolism;Lipid metabolism;Global and overview maps	-2.61937	1.20291e-05	7.0197e-06	K00128//aldehyde dehydrogenase (NAD+) [EC:1.2.1.3]+ko00410//beta-Alanine metabolism+ko00310//Lysine degradation+ko00010//Glycolysis / Gluconeogenesis+ko00903//Limonene and pinene degradation+ko00380//Tryptophan metabolism+ko00330//Arginine and proline metabolism+ko00280//Valine, leucine and isoleucine degradation+ko01100//Metabolic pathways+ko00053//Ascorbate and aldarate metabolism+ko00340//Hist…	Aldehyde dehydrogenase family		PREDICTED: aldehyde dehydrogenase family 2 member B7, mitochondrial-like [Gossypium hirsutum]	[C] KOG2450 Aldehyde dehydrogenase	Aldehyde dehydrogenase family 2 member B7, mitochondrial OS=Arabidopsis thaliana GN=ALDH2B7 PE=1 SV=2	GO:0016491//oxidoreductase activity
CL936.Contig2_All	4340	ko00010//Glycolysis / Gluconeogenesis;ko01200//Carbon metabolism;ko01110//Biosynthesis of secondary metabolites;ko01100//Metabolic pathways;ko00620//Pyruvate metabolism;ko00020//Citrate cycle (TCA cycle)	Metabolism	Carbohydrate metabolism;Global and overview maps	-2.63927	4.02824e-87	3.62068e-88	K00162//pyruvate dehydrogenase E1 component beta subunit [EC:1.2.4.1]+ko00010//Glycolysis / Gluconeogenesis+ko00020//Citrate cycle (TCA cycle)+ko01100//Metabolic pathways+ko01110//Biosynthesis of secondary metabolites+ko00620//Pyruvate metabolism+ko01200//Carbon metabolism;K00162//pyruvate dehydrogenase E1 component beta subunit [EC:1.2.4.1]+ko00010//Glycolysis / Gluconeogenesis+ko00020//Citrate …	Dehydrogenase E1 component	KJ532065.1 Kappaphycus alvarezii DNA marker SXBA04 genomic sequence	pyruvate dehydrogenase E1 component beta subunit, mitochondrial precursor (ISS) [Ostreococcus tauri]	[C] KOG0524 Pyruvate dehydrogenase E1, beta subunit	Pyruvate dehydrogenase E1 component subunit beta-2, mitochondrial OS=Oryza sativa subsp. japonica GN=Os09g0509200 PE=2 SV=1	GO:0004739//pyruvate dehydrogenase (acetyl-transferring) activity;GO:0006086//acetyl-CoA biosynthetic process from pyruvate
CL10685.Contig1_All	2372	ko00071//Fatty acid degradation;ko00561//Glycerolipid metabolism;ko01100//Metabolic pathways;ko00053//Ascorbate and aldarate metabolism;ko00380//Tryptophan metabolism;ko00010//Glycolysis / Gluconeogenesis;ko00260//Glycine, serine and threonine metabolism;ko00410//beta-Alanine metabolism;ko00330//Arginine and proline metabolism;ko00620//Pyruvate metabolism;ko00250//Alanine, aspartate and glutamate…	Metabolism	Lipid metabolism;Global and overview maps;Metabolism of other amino acids;Carbohydrate metabolism;Amino acid metabolism	-2.82739	2.41929e-44	3.53109e-45	K14085//aldehyde dehydrogenase family 7 member A1 [EC:1.2.1.31 1.2.1.8 1.2.1.3]+ko00410//beta-Alanine metabolism+ko00310//Lysine degradation+ko00010//Glycolysis / Gluconeogenesis+ko00380//Tryptophan metabolism+ko00330//Arginine and proline metabolism+ko00280//Valine, leucine and isoleucine degradation+ko01100//Metabolic pathways+ko00053//Ascorbate and aldarate metabolism+ko00340//Histidine metabo…	Aldehyde dehydrogenase family		predicted protein [Micromonas commoda] >ACO61894.1 predicted protein [Micromonas commoda]	[R] KOG1075 FOG: Reverse transcriptase	Succinate-semialdehyde dehydrogenase, mitochondrial OS=Arabidopsis thaliana GN=ALDH5F1 PE=1 SV=2	GO:0004657//proline dehydrogenase activity;GO:0010133//proline catabolic process to glutamate;GO:0003700//DNA binding transcription factor activity;GO:0003842//1-pyrroline-5-carboxylate dehydrogenase activity;GO:0016491//oxidoreductase activity
Unigene485_All	1648	ko01110//Biosynthesis of secondary metabolites;ko01200//Carbon metabolism;ko00710//Carbon fixation in photosynthetic organisms;ko00620//Pyruvate metabolism;ko00010//Glycolysis / Gluconeogenesis;ko00020//Citrate cycle (TCA cycle);ko01100//Metabolic pathways	Metabolism	Global and overview maps;Carbohydrate metabolism;Energy metabolism	-2.8957	6.80374e-19	1.79301e-19	K01610//phosphoenolpyruvate carboxykinase (ATP) [EC:4.1.1.49]+ko00010//Glycolysis / Gluconeogenesis+ko00020//Citrate cycle (TCA cycle)+ko01100//Metabolic pathways+ko01110//Biosynthesis of secondary metabolites+ko00710//Carbon fixation in photosynthetic organisms+ko00620//Pyruvate metabolism+ko01200//Carbon metabolism;K01610//phosphoenolpyruvate carboxykinase (ATP) [EC:4.1.1.49]+ko00010//Glycolysi…	Phosphoenolpyruvate carboxykinase		phosphoenolpyruvate carboxykinase (ATP) [Phytophthora parasitica]	[C] TWOG0797 Phosphoenolpyruvate carboxykinase (ATP)	Phosphoenolpyruvate carboxykinase (ATP) OS=Arabidopsis thaliana GN=PCKA PE=1 SV=1	GO:0005524//ATP binding;GO:0006094//gluconeogenesis;GO:0016301//kinase activity;GO:0004612//phosphoenolpyruvate carboxykinase (ATP) activity
Unigene25803_All	2345	ko00010//Glycolysis / Gluconeogenesis;ko00710//Carbon fixation in photosynthetic organisms;ko01200//Carbon metabolism;ko01110//Biosynthesis of secondary metabolites;ko01230//Biosynthesis of amino acids;ko01100//Metabolic pathways	Metabolism	Energy metabolism;Carbohydrate metabolism;Global and overview maps	-2.91751	4.96127e-65	5.53297e-66	K05298//glyceraldehyde-3-phosphate dehydrogenase (NADP+) (phosphorylating) [EC:1.2.1.13]+ko01100//Metabolic pathways+ko00710//Carbon fixation in photosynthetic organisms+ko01200//Carbon metabolism;K00134//glyceraldehyde 3-phosphate dehydrogenase [EC:1.2.1.12]+ko00010//Glycolysis / Gluconeogenesis+ko01230//Biosynthesis of amino acids+ko01100//Metabolic pathways+ko01110//Biosynthesis of secondary m…	Glyceraldehyde 3-phosphate dehydrogenase, C-terminal domain		glyceraldehyde-3-phosphate dehydrogenase, putative [Phytophthora infestans T30-4] >EEY66508.1 glyceraldehyde-3-phosphate dehydrogenase, putative [Phytophthora infestans T30-4]	[G] KOG0657 Glyceraldehyde 3-phosphate dehydrogenase	Glyceraldehyde-3-phosphate dehydrogenase A, chloroplastic OS=Zea mays GN=GAPA PE=2 SV=1	GO:0016620//oxidoreductase activity, acting on the aldehyde or oxo group of donors, NAD or NADP as acceptor
CL3230.Contig2_All	1351	ko00010//Glycolysis / Gluconeogenesis;ko00710//Carbon fixation in photosynthetic organisms;ko01230//Biosynthesis of amino acids;ko01200//Carbon metabolism;ko00051//Fructose and mannose metabolism;ko00562//Inositol phosphate metabolism;ko01100//Metabolic pathways;ko01110//Biosynthesis of secondary metabolites	Metabolism	Global and overview maps;Carbohydrate metabolism;Energy metabolism	-2.93658	8.41083e-15	2.61677e-15	K01803//triosephosphate isomerase (TIM) [EC:5.3.1.1]+ko00010//Glycolysis / Gluconeogenesis+ko01230//Biosynthesis of amino acids+ko01100//Metabolic pathways+ko00051//Fructose and mannose metabolism+ko01110//Biosynthesis of secondary metabolites+ko00710//Carbon fixation in photosynthetic organisms+ko01200//Carbon metabolism+ko00562//Inositol phosphate metabolism	C2 domain		C2 domain-containing Hypothetical protein [Phytophthora megakarya]	[TU] KOG1028 Ca2+-dependent phospholipid-binding protein Synaptotagmin, required for synaptic vesicle and secretory granule exocytosis	Synaptotagmin-2 OS=Arabidopsis thaliana GN=SYT2 PE=2 SV=1	GO:0005783//endoplasmic reticulum
CL9215.Contig1_All	1079	ko00630//Glyoxylate and dicarboxylate metabolism;ko00010//Glycolysis / Gluconeogenesis;ko01200//Carbon metabolism;ko00620//Pyruvate metabolism;ko01100//Metabolic pathways;ko00640//Propanoate metabolism;ko01110//Biosynthesis of secondary metabolites	Metabolism	Carbohydrate metabolism;Global and overview maps	-3.01673	2.2484e-05	1.35572e-05	K01895//acetyl-CoA synthetase [EC:6.2.1.1]+ko00010//Glycolysis / Gluconeogenesis+ko00640//Propanoate metabolism+ko01100//Metabolic pathways+ko01110//Biosynthesis of secondary metabolites+ko00620//Pyruvate metabolism+ko01200//Carbon metabolism+ko00630//Glyoxylate and dicarboxylate metabolism;K01895//acetyl-CoA synthetase [EC:6.2.1.1]+ko00010//Glycolysis / Gluconeogenesis+ko00640//Propanoate metabo…	AMP-binding enzyme		PREDICTED: uncharacterized protein PA3568 [Ricinus communis] >EEF26567.1 acetyl-CoA synthetase, putative [Ricinus communis]	[I] KOG1175 Acyl-CoA synthetase	Formin-like protein 3 OS=Oryza sativa subsp. japonica GN=FH3 PE=2 SV=2	GO:0003987//acetate-CoA ligase activity;GO:0008152//metabolic process;GO:0003824//catalytic activity
Unigene2569_All	770	ko01230//Biosynthesis of amino acids;ko01100//Metabolic pathways;ko01200//Carbon metabolism;ko01110//Biosynthesis of secondary metabolites;ko00010//Glycolysis / Gluconeogenesis;ko03018//RNA degradation	Metabolism;Genetic Information Processing	Carbohydrate metabolism;Global and overview maps;Folding, sorting and degradation	-3.25421	1.19182e-08	5.25983e-09	K01689//enolase [EC:4.2.1.11]+ko00010//Glycolysis / Gluconeogenesis+ko01230//Biosynthesis of amino acids+ko03018//RNA degradation+ko01100//Metabolic pathways+ko01110//Biosynthesis of secondary metabolites+ko01200//Carbon metabolism;K01689//enolase [EC:4.2.1.11]+ko00010//Glycolysis / Gluconeogenesis+ko01230//Biosynthesis of amino acids+ko03018//RNA degradation+ko01100//Metabolic pathways+ko01110//…	Dpy-30 motif		conserved unknown protein [Ectocarpus siliculosus]	[G] KOG2670 Enolase	Cytosolic enolase 3 OS=Arabidopsis thaliana GN=ENO3 PE=1 SV=1	GO:0000287//magnesium ion binding;GO:0004634//phosphopyruvate hydratase activity;GO:0006096//glycolytic process;GO:0000015//phosphopyruvate hydratase complex
Unigene86158_All	638	ko00260//Glycine, serine and threonine metabolism;ko00630//Glyoxylate and dicarboxylate metabolism;ko01110//Biosynthesis of secondary metabolites;ko00020//Citrate cycle (TCA cycle);ko00280//Valine, leucine and isoleucine degradation;ko00620//Pyruvate metabolism;ko01100//Metabolic pathways;ko01200//Carbon metabolism;ko00010//Glycolysis / Gluconeogenesis;ko00640//Propanoate metabolism	Metabolism	Amino acid metabolism;Global and overview maps;Carbohydrate metabolism	-3.38455	1.46995e-81	1.38479e-82	K00382//dihydrolipoamide dehydrogenase [EC:1.8.1.4]+ko00010//Glycolysis / Gluconeogenesis+ko00020//Citrate cycle (TCA cycle)+ko00280//Valine, leucine and isoleucine degradation+ko00640//Propanoate metabolism+ko01100//Metabolic pathways+ko01110//Biosynthesis of secondary metabolites+ko00260//Glycine, serine and threonine metabolism+ko00620//Pyruvate metabolism+ko01200//Carbon metabolism+ko00630//G…	Pyridine nucleotide-disulphide oxidoreductase		mercuric reductase [Ectocarpus siliculosus]	[C] KOG1335 Dihydrolipoamide dehydrogenase	Dihydrolipoyl dehydrogenase 1, chloroplastic OS=Arabidopsis thaliana GN=LPD1 PE=2 SV=1	GO:0009055//electron transfer activity;GO:0005623//cell;GO:0050660//flavin adenine dinucleotide binding;GO:0016021//integral component of membrane;GO:0016668//oxidoreductase activity, acting on a sulfur group of donors, NAD(P) as acceptor;GO:0045454//cell redox homeostasis;GO:0016491//oxidoreductase activity
Unigene73092_All	958	ko00520//Amino sugar and nucleotide sugar metabolism;ko00010//Glycolysis / Gluconeogenesis;ko01100//Metabolic pathways;ko01200//Carbon metabolism;ko00500//Starch and sucrose metabolism;ko01110//Biosynthesis of secondary metabolites;ko00030//Pentose phosphate pathway	Metabolism	Global and overview maps;Carbohydrate metabolism	-3.40364	4.39469e-07	2.21031e-07	K01810//glucose-6-phosphate isomerase [EC:5.3.1.9]+ko00010//Glycolysis / Gluconeogenesis+ko00030//Pentose phosphate pathway+ko00520//Amino sugar and nucleotide sugar metabolism+ko01100//Metabolic pathways+ko00500//Starch and sucrose metabolism+ko01110//Biosynthesis of secondary metabolites+ko01200//Carbon metabolism;K01810//glucose-6-phosphate isomerase [EC:5.3.1.9]+ko00010//Glycolysis / Gluconeo…	Phosphoglucose isomerase		PREDICTED: uncharacterized protein LOC104886433 [Beta vulgaris subsp. vulgaris]	[G] KOG2446 Glucose-6-phosphate isomerase	Glucose-6-phosphate isomerase, cytosolic 1 OS=Clarkia williamsonii GN=PGIC1 PE=3 SV=1
CL10685.Contig2_All	2004	ko00380//Tryptophan metabolism;ko00250//Alanine, aspartate and glutamate metabolism;ko00260//Glycine, serine and threonine metabolism;ko00561//Glycerolipid metabolism;ko01110//Biosynthesis of secondary metabolites;ko00053//Ascorbate and aldarate metabolism;ko00650//Butanoate metabolism;ko00330//Arginine and proline metabolism;ko00280//Valine, leucine and isoleucine degradation;ko00010//Glycolysis…	Metabolism	Metabolism of other amino acids;Global and overview maps;Carbohydrate metabolism;Lipid metabolism;Amino acid metabolism	-3.50777	3.08077e-18	8.33384e-19	K17761//succinate-semialdehyde dehydrogenase, mitochondrial [EC:1.2.1.24]+ko00250//Alanine, aspartate and glutamate metabolism+ko01100//Metabolic pathways+ko00650//Butanoate metabolism;K14085//aldehyde dehydrogenase family 7 member A1 [EC:1.2.1.31 1.2.1.8 1.2.1.3]+ko00410//beta-Alanine metabolism+ko00310//Lysine degradation+ko00010//Glycolysis / Gluconeogenesis+ko00380//Tryptophan metabolism+ko00…	Aldehyde dehydrogenase family		predicted protein [Micromonas commoda] >ACO61894.1 predicted protein [Micromonas commoda]	[C] KOG2450 Aldehyde dehydrogenase	Aldehyde dehydrogenase family 7 member A1 OS=Brassica napus GN=BTG-26 PE=1 SV=3	GO:0004657//proline dehydrogenase activity;GO:0010133//proline catabolic process to glutamate;GO:0003700//DNA binding transcription factor activity;GO:0003842//1-pyrroline-5-carboxylate dehydrogenase activity;GO:0016491//oxidoreductase activity
CL8413.Contig2_All	2416	ko01100//Metabolic pathways;ko01200//Carbon metabolism;ko01110//Biosynthesis of secondary metabolites;ko00620//Pyruvate metabolism;ko00630//Glyoxylate and dicarboxylate metabolism;ko00640//Propanoate metabolism;ko00010//Glycolysis / Gluconeogenesis	Metabolism	Global and overview maps;Carbohydrate metabolism	-3.57461	0	0	K01895//acetyl-CoA synthetase [EC:6.2.1.1]+ko00010//Glycolysis / Gluconeogenesis+ko00640//Propanoate metabolism+ko01100//Metabolic pathways+ko01110//Biosynthesis of secondary metabolites+ko00620//Pyruvate metabolism+ko01200//Carbon metabolism+ko00630//Glyoxylate and dicarboxylate metabolism;K01895//acetyl-CoA synthetase [EC:6.2.1.1]+ko00010//Glycolysis / Gluconeogenesis+ko00640//Propanoate metabo…	AMP-binding enzyme	XM_009530966.1 Phytophthora sojae hypothetical protein partial mRNA	acyl-CoA synthetase [Nannochloropsis gaditana CCMP526] >EKU22239.1 acyl-CoA synthetase [Nannochloropsis gaditana CCMP526]	[I] KOG1175 Acyl-CoA synthetase	Acetyl-coenzyme A synthetase, chloroplastic/glyoxysomal OS=Arabidopsis thaliana GN=ACS PE=1 SV=1	GO:0019427//acetyl-CoA biosynthetic process from acetate;GO:0003987//acetate-CoA ligase activity;GO:0005524//ATP binding;GO:0016208//AMP binding
CL4408.Contig1_All	1591	ko00010//Glycolysis / Gluconeogenesis;ko00620//Pyruvate metabolism;ko00230//Purine metabolism;ko01110//Biosynthesis of secondary metabolites;ko01230//Biosynthesis of amino acids;ko01200//Carbon metabolism;ko01100//Metabolic pathways	Metabolism	Carbohydrate metabolism;Global and overview maps;Nucleotide metabolism	-3.5862	1.85236e-26	3.90623e-27	K00873//pyruvate kinase [EC:2.7.1.40]+ko00010//Glycolysis / Gluconeogenesis+ko00230//Purine metabolism+ko01230//Biosynthesis of amino acids+ko01100//Metabolic pathways+ko01110//Biosynthesis of secondary metabolites+ko00620//Pyruvate metabolism+ko01200//Carbon metabolism;K00873//pyruvate kinase [EC:2.7.1.40]+ko00010//Glycolysis / Gluconeogenesis+ko00230//Purine metabolism+ko01230//Biosynthesis of …	Pyruvate kinase, barrel domain		pyruvate kinase [Sargassum vachellianum]	[G] KOG2323 Pyruvate kinase	Pyruvate kinase, cytosolic isozyme OS=Glycine max PE=2 SV=1
CL8095.Contig1_All	917	ko00270//Cysteine and methionine metabolism;ko01100//Metabolic pathways;ko00640//Propanoate metabolism;ko00620//Pyruvate metabolism;ko01110//Biosynthesis of secondary metabolites;ko00010//Glycolysis / Gluconeogenesis	Metabolism	Global and overview maps;Amino acid metabolism;Carbohydrate metabolism	-3.61937	7.3335e-25	1.60621e-25	K00016//L-lactate dehydrogenase [EC:1.1.1.27]+ko00010//Glycolysis / Gluconeogenesis+ko00640//Propanoate metabolism+ko01100//Metabolic pathways+ko01110//Biosynthesis of secondary metabolites+ko00620//Pyruvate metabolism+ko00270//Cysteine and methionine metabolism;K00016//L-lactate dehydrogenase [EC:1.1.1.27]+ko00010//Glycolysis / Gluconeogenesis+ko00640//Propanoate metabolism+ko01100//Metabolic pa…	lactate/malate dehydrogenase, NAD binding domain	U80676.1 Botryococcus braunii malate dehydrogenase gene, complete cds	RecName: Full=L-lactate dehydrogenase; Short=LDH >AAB38970.1 malate dehydrogenase [Botryococcus braunii]	[C] KOG1495 Lactate dehydrogenase	L-lactate dehydrogenase OS=Botryococcus braunii PE=1 SV=1	GO:0019752//carboxylic acid metabolic process;GO:0005975//carbohydrate metabolic process;GO:0004459//L-lactate dehydrogenase activity;GO:0005737//cytoplasm
Unigene64694_All	1004	ko03015//mRNA surveillance pathway;ko00010//Glycolysis / Gluconeogenesis;ko01100//Metabolic pathways;ko00052//Galactose metabolism;ko03013//RNA transport;ko01200//Carbon metabolism;ko01110//Biosynthesis of secondary metabolites;ko00520//Amino sugar and nucleotide sugar metabolism;ko00500//Starch and sucrose metabolism	Genetic Information Processing;Metabolism	Translation;Global and overview maps;Carbohydrate metabolism	-3.61937	2.36931e-08	1.07199e-08	K00845//glucokinase [EC:2.7.1.2]+ko00010//Glycolysis / Gluconeogenesis+ko00520//Amino sugar and nucleotide sugar metabolism+ko01100//Metabolic pathways+ko00052//Galactose metabolism+ko00500//Starch and sucrose metabolism+ko01110//Biosynthesis of secondary metabolites+ko01200//Carbon metabolism;K00845//glucokinase [EC:2.7.1.2]+ko00010//Glycolysis / Gluconeogenesis+ko00520//Amino sugar and nucleoti…	Glucokinase		ATP-dependent DNA helicase PcrA [Auxenochlorella protothecoides] >KFM28143.1 ATP-dependent DNA helicase PcrA [Auxenochlorella protothecoides]	[A] KOG1869 Splicing coactivator SRm160/300, subunit SRm300		GO:0003677//DNA binding;GO:0005524//ATP binding;GO:0004340//glucokinase activity;GO:0006096//glycolytic process;GO:0004003//ATP-dependent DNA helicase activity
Unigene30702_All	1835	ko00620//Pyruvate metabolism;ko00010//Glycolysis / Gluconeogenesis;ko01110//Biosynthesis of secondary metabolites;ko00270//Cysteine and methionine metabolism;ko01100//Metabolic pathways;ko00640//Propanoate metabolism	Metabolism	Amino acid metabolism;Global and overview maps;Carbohydrate metabolism	-3.62603	5.21334e-44	7.65321e-45	K00016//L-lactate dehydrogenase [EC:1.1.1.27]+ko00010//Glycolysis / Gluconeogenesis+ko00640//Propanoate metabolism+ko01100//Metabolic pathways+ko01110//Biosynthesis of secondary metabolites+ko00620//Pyruvate metabolism+ko00270//Cysteine and methionine metabolism;K00016//L-lactate dehydrogenase [EC:1.1.1.27]+ko00010//Glycolysis / Gluconeogenesis+ko00640//Propanoate metabolism+ko01100//Metabolic pa…	lactate/malate dehydrogenase, NAD binding domain		RecName: Full=L-lactate dehydrogenase; Short=LDH >AAB38970.1 malate dehydrogenase [Botryococcus braunii]	[C] KOG1495 Lactate dehydrogenase	L-lactate dehydrogenase OS=Botryococcus braunii PE=1 SV=1	GO:0019752//carboxylic acid metabolic process;GO:0005975//carbohydrate metabolic process;GO:0004459//L-lactate dehydrogenase activity;GO:0005737//cytoplasm
Unigene42696_All	1040	ko01110//Biosynthesis of secondary metabolites;ko00710//Carbon fixation in photosynthetic organisms;ko01200//Carbon metabolism;ko01230//Biosynthesis of amino acids;ko01100//Metabolic pathways;ko00010//Glycolysis / Gluconeogenesis	Metabolism	Carbohydrate metabolism;Global and overview maps;Energy metabolism	-3.69737	1.24364e-31	2.32917e-32	K05298//glyceraldehyde-3-phosphate dehydrogenase (NADP+) (phosphorylating) [EC:1.2.1.13]+ko01100//Metabolic pathways+ko00710//Carbon fixation in photosynthetic organisms+ko01200//Carbon metabolism;K05298//glyceraldehyde-3-phosphate dehydrogenase (NADP+) (phosphorylating) [EC:1.2.1.13]+ko01100//Metabolic pathways+ko00710//Carbon fixation in photosynthetic organisms+ko01200//Carbon metabolism;K0013…	Glyceraldehyde 3-phosphate dehydrogenase, C-terminal domain		Glyceraldehyde-3-phosphate dehydrogenase A, chloroplastic [Auxenochlorella protothecoides] >KFM26247.1 Glyceraldehyde-3-phosphate dehydrogenase A, chloroplastic [Auxenochlorella protothecoides]	[G] KOG0657 Glyceraldehyde 3-phosphate dehydrogenase	Glyceraldehyde-3-phosphate dehydrogenase GAPA2, chloroplastic OS=Arabidopsis thaliana GN=GAPA2 PE=2 SV=1	GO:0006006//glucose metabolic process;GO:0016620//oxidoreductase activity, acting on the aldehyde or oxo group of donors, NAD or NADP as acceptor;GO:0050661//NADP binding;GO:0051287//NAD binding
CL7257.Contig9_All	2402	ko01110//Biosynthesis of secondary metabolites;ko00620//Pyruvate metabolism;ko00010//Glycolysis / Gluconeogenesis;ko00710//Carbon fixation in photosynthetic organisms;ko01100//Metabolic pathways;ko00020//Citrate cycle (TCA cycle);ko01200//Carbon metabolism	Metabolism	Carbohydrate metabolism;Energy metabolism;Global and overview maps	-3.70591	6.74762e-301	2.31251e-302	K01610//phosphoenolpyruvate carboxykinase (ATP) [EC:4.1.1.49]+ko00010//Glycolysis / Gluconeogenesis+ko00020//Citrate cycle (TCA cycle)+ko01100//Metabolic pathways+ko01110//Biosynthesis of secondary metabolites+ko00710//Carbon fixation in photosynthetic organisms+ko00620//Pyruvate metabolism+ko01200//Carbon metabolism;K01610//phosphoenolpyruvate carboxykinase (ATP) [EC:4.1.1.49]+ko00010//Glycolysi…	Phosphoenolpyruvate carboxykinase		phosphoenolpyruvate carboxykinase [Nannochloropsis gaditana]	[C] TWOG0797 Phosphoenolpyruvate carboxykinase (ATP)	Phosphoenolpyruvate carboxykinase (ATP) OS=Arabidopsis thaliana GN=PCKA PE=1 SV=1	GO:0005524//ATP binding;GO:0006094//gluconeogenesis;GO:0016301//kinase activity;GO:0005829//cytosol;GO:0004612//phosphoenolpyruvate carboxykinase (ATP) activity
Unigene27427_All	1614	ko00053//Ascorbate and aldarate metabolism;ko00380//Tryptophan metabolism;ko01110//Biosynthesis of secondary metabolites;ko00310//Lysine degradation;ko00340//Histidine metabolism;ko00010//Glycolysis / Gluconeogenesis;ko00561//Glycerolipid metabolism;ko00410//beta-Alanine metabolism;ko00620//Pyruvate metabolism;ko01100//Metabolic pathways;ko00280//Valine, leucine and isoleucine degradation;ko00071…	Metabolism	Amino acid metabolism;Lipid metabolism;Biosynthesis of other secondary metabolites;Carbohydrate metabolism;Metabolism of other amino acids;Metabolism of terpenoids and polyketides;Global and overview maps	-3.71623	3.82707e-32	7.08507e-33	K12355//coniferyl-aldehyde dehydrogenase [EC:1.2.1.68]+ko00940//Phenylpropanoid biosynthesis;K00128//aldehyde dehydrogenase (NAD+) [EC:1.2.1.3]+ko00410//beta-Alanine metabolism+ko00310//Lysine degradation+ko00010//Glycolysis / Gluconeogenesis+ko00903//Limonene and pinene degradation+ko00380//Tryptophan metabolism+ko00330//Arginine and proline metabolism+ko00280//Valine, leucine and isoleucine deg…	Aldehyde dehydrogenase family		putative mitochondrial aldehyde dehydrogenase [Emiliania huxleyi CCMP1516] >EOD26605.1 putative mitochondrial aldehyde dehydrogenase [Emiliania huxleyi CCMP1516]	[C] KOG2450 Aldehyde dehydrogenase	Aldehyde dehydrogenase family 2 member C4 OS=Arabidopsis thaliana GN=ALDH2C4 PE=1 SV=2	GO:0004029//aldehyde dehydrogenase (NAD) activity;GO:0016491//oxidoreductase activity
CL8413.Contig1_All	2466	ko00620//Pyruvate metabolism;ko00010//Glycolysis / Gluconeogenesis;ko01100//Metabolic pathways;ko00630//Glyoxylate and dicarboxylate metabolism;ko01110//Biosynthesis of secondary metabolites;ko00640//Propanoate metabolism;ko01200//Carbon metabolism	Metabolism	Global and overview maps;Carbohydrate metabolism	-3.78386	2.09452e-45	3.01663e-46	K01895//acetyl-CoA synthetase [EC:6.2.1.1]+ko00010//Glycolysis / Gluconeogenesis+ko00640//Propanoate metabolism+ko01100//Metabolic pathways+ko01110//Biosynthesis of secondary metabolites+ko00620//Pyruvate metabolism+ko01200//Carbon metabolism+ko00630//Glyoxylate and dicarboxylate metabolism;K01895//acetyl-CoA synthetase [EC:6.2.1.1]+ko00010//Glycolysis / Gluconeogenesis+ko00640//Propanoate metabo…	AMP-binding enzyme	XM_009530966.1 Phytophthora sojae hypothetical protein partial mRNA	acyl-CoA synthetase [Nannochloropsis gaditana CCMP526] >EKU22239.1 acyl-CoA synthetase [Nannochloropsis gaditana CCMP526]	[I] KOG1175 Acyl-CoA synthetase	Acetyl-coenzyme A synthetase, chloroplastic/glyoxysomal OS=Arabidopsis thaliana GN=ACS PE=1 SV=1	GO:0019427//acetyl-CoA biosynthetic process from acetate;GO:0003987//acetate-CoA ligase activity;GO:0005524//ATP binding;GO:0016208//AMP binding
CL917.Contig1_All	1979	ko00010//Glycolysis / Gluconeogenesis;ko00350//Tyrosine metabolism;ko01100//Metabolic pathways;ko00260//Glycine, serine and threonine metabolism;ko00071//Fatty acid degradation;ko01110//Biosynthesis of secondary metabolites;ko01200//Carbon metabolism	Metabolism	Lipid metabolism;Global and overview maps;Amino acid metabolism;Carbohydrate metabolism	-3.82825	6.47201e-71	6.77002e-72	K00060//threonine 3-dehydrogenase [EC:1.1.1.103]+ko00260//Glycine, serine and threonine metabolism;K00121//S-(hydroxymethyl)glutathione dehydrogenase / alcohol dehydrogenase [EC:1.1.1.284 1.1.1.1]+ko00010//Glycolysis / Gluconeogenesis+ko00350//Tyrosine metabolism+ko01100//Metabolic pathways+ko01110//Biosynthesis of secondary metabolites+ko00071//Fatty acid degradation+ko01200//Carbon metabolism;K…	SAICAR synthetase		alcohol dehydrogenase [Chrysochromulina sp. CCMP291]	[Q] KOG0024 Sorbitol dehydrogenase	Probable cinnamyl alcohol dehydrogenase 8A OS=Oryza sativa subsp. japonica GN=CAD8A PE=2 SV=1	GO:0004022//alcohol dehydrogenase (NAD) activity;GO:0008270//zinc ion binding
Unigene12537_All	2611	ko01110//Biosynthesis of secondary metabolites;ko00010//Glycolysis / Gluconeogenesis;ko01100//Metabolic pathways	Metabolism	Carbohydrate metabolism;Global and overview maps	-3.89519	0	0	K01792//glucose-6-phosphate 1-epimerase [EC:5.1.3.15]+ko00010//Glycolysis / Gluconeogenesis+ko01100//Metabolic pathways+ko01110//Biosynthesis of secondary metabolites;K01792//glucose-6-phosphate 1-epimerase [EC:5.1.3.15]+ko00010//Glycolysis / Gluconeogenesis+ko01100//Metabolic pathways+ko01110//Biosynthesis of secondary metabolites;K01792//glucose-6-phosphate 1-epimerase [EC:5.1.3.15]+ko00010//Gl…	Aldose 1-epimerase		galactose mutarotase-like protein [Coccomyxa subellipsoidea C-169] >EIE25671.1 galactose mutarotase-like protein [Coccomyxa subellipsoidea C-169]	[G] KOG1594 Uncharacterized enzymes related to aldose 1-epimerase	Putative glucose-6-phosphate 1-epimerase OS=Cenchrus ciliaris PE=2 SV=1	GO:0030246//carbohydrate binding;GO:0047938//glucose-6-phosphate 1-epimerase activity;GO:0005975//carbohydrate metabolic process
Unigene74727_All	630	ko00620//Pyruvate metabolism;ko01200//Carbon metabolism;ko00020//Citrate cycle (TCA cycle);ko01110//Biosynthesis of secondary metabolites;ko00010//Glycolysis / Gluconeogenesis;ko01100//Metabolic pathways	Metabolism	Global and overview maps;Carbohydrate metabolism	-3.9413	0.000208698	0.000143657	K00627//pyruvate dehydrogenase E2 component (dihydrolipoamide acetyltransferase) [EC:2.3.1.12]+ko00010//Glycolysis / Gluconeogenesis+ko00020//Citrate cycle (TCA cycle)+ko01100//Metabolic pathways+ko01110//Biosynthesis of secondary metabolites+ko00620//Pyruvate metabolism+ko01200//Carbon metabolism;K00627//pyruvate dehydrogenase E2 component (dihydrolipoamide acetyltransferase) [EC:2.3.1.12]+ko000…	e3 binding domain		dihydrolipoamide acetyltransferase [Chlamydomonas reinhardtii] >EDP01882.1 dihydrolipoamide acetyltransferase [Chlamydomonas reinhardtii]	[C] KOG0557 Dihydrolipoamide acetyltransferase	Dihydrolipoyllysine-residue acetyltransferase component 5 of pyruvate dehydrogenase complex, chloroplastic OS=Arabidopsis thaliana GN=EMB3003 PE=2 SV=1	GO:0005759//mitochondrial matrix;GO:0004742//dihydrolipoyllysine-residue acetyltransferase activity;GO:0006090//pyruvate metabolic process;GO:0016746//transferase activity, transferring acyl groups;GO:0008061//chitin binding;GO:0045254//pyruvate dehydrogenase complex;GO:0006030//chitin metabolic process;GO:0005576//extracellular region
Unigene62165_All	1584	ko00010//Glycolysis / Gluconeogenesis;ko00640//Propanoate metabolism;ko00020//Citrate cycle (TCA cycle);ko00630//Glyoxylate and dicarboxylate metabolism;ko00620//Pyruvate metabolism;ko01110//Biosynthesis of secondary metabolites;ko00260//Glycine, serine and threonine metabolism;ko01200//Carbon metabolism;ko00280//Valine, leucine and isoleucine degradation;ko01100//Metabolic pathways	Metabolism	Global and overview maps;Amino acid metabolism;Carbohydrate metabolism	-3.9604	3.64538e-17	1.02945e-17	K00382//dihydrolipoamide dehydrogenase [EC:1.8.1.4]+ko00010//Glycolysis / Gluconeogenesis+ko00020//Citrate cycle (TCA cycle)+ko00280//Valine, leucine and isoleucine degradation+ko00640//Propanoate metabolism+ko01100//Metabolic pathways+ko01110//Biosynthesis of secondary metabolites+ko00260//Glycine, serine and threonine metabolism+ko00620//Pyruvate metabolism+ko01200//Carbon metabolism+ko00630//G…	Pyridine nucleotide-disulphide oxidoreductase		hypothetical protein CEUSTIGMA_g8156.t1 [Chlamydomonas eustigma]	[C] KOG1335 Dihydrolipoamide dehydrogenase	Leghemoglobin reductase OS=Vigna unguiculata GN=FLBR PE=1 SV=1
CL7257.Contig8_All	2441	ko01200//Carbon metabolism;ko00710//Carbon fixation in photosynthetic organisms;ko00620//Pyruvate metabolism;ko00010//Glycolysis / Gluconeogenesis;ko00020//Citrate cycle (TCA cycle);ko01100//Metabolic pathways;ko01110//Biosynthesis of secondary metabolites	Metabolism	Carbohydrate metabolism;Energy metabolism;Global and overview maps	-3.97703	0	0	K01610//phosphoenolpyruvate carboxykinase (ATP) [EC:4.1.1.49]+ko00010//Glycolysis / Gluconeogenesis+ko00020//Citrate cycle (TCA cycle)+ko01100//Metabolic pathways+ko01110//Biosynthesis of secondary metabolites+ko00710//Carbon fixation in photosynthetic organisms+ko00620//Pyruvate metabolism+ko01200//Carbon metabolism;K01610//phosphoenolpyruvate carboxykinase (ATP) [EC:4.1.1.49]+ko00010//Glycolysi…	Phosphoenolpyruvate carboxykinase		phosphoenolpyruvate carboxykinase [Nannochloropsis gaditana]	[C] TWOG0797 Phosphoenolpyruvate carboxykinase (ATP)	Phosphoenolpyruvate carboxykinase (ATP) OS=Arabidopsis thaliana GN=PCKA PE=1 SV=1	GO:0005524//ATP binding;GO:0006094//gluconeogenesis;GO:0016301//kinase activity;GO:0005829//cytosol;GO:0004612//phosphoenolpyruvate carboxykinase (ATP) activity
CL5570.Contig3_All	2082	ko00630//Glyoxylate and dicarboxylate metabolism;ko00010//Glycolysis / Gluconeogenesis;ko01110//Biosynthesis of secondary metabolites;ko00640//Propanoate metabolism;ko01100//Metabolic pathways;ko00620//Pyruvate metabolism;ko01200//Carbon metabolism	Metabolism	Carbohydrate metabolism;Global and overview maps	-4.47613	2.07083e-30	3.9696e-31	K01895//acetyl-CoA synthetase [EC:6.2.1.1]+ko00010//Glycolysis / Gluconeogenesis+ko00640//Propanoate metabolism+ko01100//Metabolic pathways+ko01110//Biosynthesis of secondary metabolites+ko00620//Pyruvate metabolism+ko01200//Carbon metabolism+ko00630//Glyoxylate and dicarboxylate metabolism;K01895//acetyl-CoA synthetase [EC:6.2.1.1]+ko00010//Glycolysis / Gluconeogenesis+ko00640//Propanoate metabo…	AMP-binding enzyme		acetyl-coenzyme A synthetase, chloroplastic/glyoxysomal-like [Dorcoceras hygrometricum]	[I] KOG1175 Acyl-CoA synthetase	Acetyl-coenzyme A synthetase, chloroplastic/glyoxysomal OS=Arabidopsis thaliana GN=ACS PE=1 SV=1	GO:0019427//acetyl-CoA biosynthetic process from acetate;GO:0003987//acetate-CoA ligase activity;GO:0016208//AMP binding
Unigene72297_All	521	ko01100//Metabolic pathways;ko00640//Propanoate metabolism;ko00010//Glycolysis / Gluconeogenesis;ko01200//Carbon metabolism;ko00630//Glyoxylate and dicarboxylate metabolism;ko01110//Biosynthesis of secondary metabolites;ko00620//Pyruvate metabolism	Metabolism	Global and overview maps;Carbohydrate metabolism	-4.49384	0.000965735	0.000743173	K01895//acetyl-CoA synthetase [EC:6.2.1.1]+ko00010//Glycolysis / Gluconeogenesis+ko00640//Propanoate metabolism+ko01100//Metabolic pathways+ko01110//Biosynthesis of secondary metabolites+ko00620//Pyruvate metabolism+ko01200//Carbon metabolism+ko00630//Glyoxylate and dicarboxylate metabolism;K01895//acetyl-CoA synthetase [EC:6.2.1.1]+ko00010//Glycolysis / Gluconeogenesis+ko00640//Propanoate metabo…	AMP-binding enzyme		Acyl-CoA synthetase short-chain family member 3, mitochondrial [Symbiodinium microadriaticum]	[I] KOG1175 Acyl-CoA synthetase	Probable 4-coumarate--CoA ligase 4 OS=Oryza sativa subsp. japonica GN=4CL4 PE=2 SV=1	GO:0008152//metabolic process;GO:0003824//catalytic activity
Unigene16538_All	942	ko01100//Metabolic pathways;ko01200//Carbon metabolism;ko00030//Pentose phosphate pathway;ko01230//Biosynthesis of amino acids;ko01110//Biosynthesis of secondary metabolites;ko00010//Glycolysis / Gluconeogenesis;ko00710//Carbon fixation in photosynthetic organisms;ko00051//Fructose and mannose metabolism	Metabolism	Global and overview maps;Energy metabolism;Carbohydrate metabolism	-4.54537	6.46998e-27	1.3459e-27	K01623//fructose-bisphosphate aldolase, class I [EC:4.1.2.13]+ko00010//Glycolysis / Gluconeogenesis+ko00030//Pentose phosphate pathway+ko01230//Biosynthesis of amino acids+ko01100//Metabolic pathways+ko00051//Fructose and mannose metabolism+ko01110//Biosynthesis of secondary metabolites+ko00710//Carbon fixation in photosynthetic organisms+ko01200//Carbon metabolism;K01623//fructose-bisphosphate a…	Fructose-bisphosphate aldolase class-I		class I fructose-bisphosphate aldolase [Thalassiosira oceanica]	[G] KOG1557 Fructose-biphosphate aldolase	Fructose-bisphosphate aldolase 7, cytosolic OS=Arabidopsis thaliana GN=FBA7 PE=2 SV=2	GO:0004332//fructose-bisphosphate aldolase activity;GO:0006096//glycolytic process
Unigene46872_All	758	ko01110//Biosynthesis of secondary metabolites;ko01230//Biosynthesis of amino acids;ko01200//Carbon metabolism;ko01100//Metabolic pathways;ko00030//Pentose phosphate pathway;ko00710//Carbon fixation in photosynthetic organisms;ko00010//Glycolysis / Gluconeogenesis;ko00051//Fructose and mannose metabolism	Metabolism	Carbohydrate metabolism;Energy metabolism;Global and overview maps	-4.55797	8.265e-17	2.37059e-17	K01623//fructose-bisphosphate aldolase, class I [EC:4.1.2.13]+ko00010//Glycolysis / Gluconeogenesis+ko00030//Pentose phosphate pathway+ko01230//Biosynthesis of amino acids+ko01100//Metabolic pathways+ko00051//Fructose and mannose metabolism+ko01110//Biosynthesis of secondary metabolites+ko00710//Carbon fixation in photosynthetic organisms+ko01200//Carbon metabolism;K01623//fructose-bisphosphate a…	Fructose-bisphosphate aldolase class-I		hypothetical protein FisN_16Hh094 [Fistulifera solaris]	[G] KOG1557 Fructose-biphosphate aldolase	Fructose-bisphosphate aldolase 1, chloroplastic OS=Chlamydomonas reinhardtii GN=ALDCHL PE=2 SV=2
Unigene65653_All	509	ko00710//Carbon fixation in photosynthetic organisms;ko01200//Carbon metabolism;ko01230//Biosynthesis of amino acids;ko00010//Glycolysis / Gluconeogenesis;ko00562//Inositol phosphate metabolism;ko00051//Fructose and mannose metabolism;ko01100//Metabolic pathways;ko01110//Biosynthesis of secondary metabolites	Metabolism	Global and overview maps;Carbohydrate metabolism;Energy metabolism	-4.61937	0.000536232	0.000394685	K01803//triosephosphate isomerase (TIM) [EC:5.3.1.1]+ko00010//Glycolysis / Gluconeogenesis+ko01230//Biosynthesis of amino acids+ko01100//Metabolic pathways+ko00051//Fructose and mannose metabolism+ko01110//Biosynthesis of secondary metabolites+ko00710//Carbon fixation in photosynthetic organisms+ko01200//Carbon metabolism+ko00562//Inositol phosphate metabolism;K01803//triosephosphate isomerase (T…	Triosephosphate isomerase		Triosephosphate isomerase [Ostreococcus tauri]	[G] KOG1643 Triosephosphate isomerase	Triosephosphate isomerase, cytosolic OS=Stellaria longipes GN=TPI PE=2 SV=1
CL37.Contig1_All	663	ko01110//Biosynthesis of secondary metabolites;ko00010//Glycolysis / Gluconeogenesis;ko01100//Metabolic pathways;ko01200//Carbon metabolism;ko00620//Pyruvate metabolism;ko00020//Citrate cycle (TCA cycle)	Metabolism	Global and overview maps;Carbohydrate metabolism	-4.66434	0.000430058	0.00031082	K00162//pyruvate dehydrogenase E1 component beta subunit [EC:1.2.4.1]+ko00010//Glycolysis / Gluconeogenesis+ko00020//Citrate cycle (TCA cycle)+ko01100//Metabolic pathways+ko01110//Biosynthesis of secondary metabolites+ko00620//Pyruvate metabolism+ko01200//Carbon metabolism;K00627//pyruvate dehydrogenase E2 component (dihydrolipoamide acetyltransferase) [EC:2.3.1.12]+ko00010//Glycolysis / Gluconeo…	Biotin-requiring enzyme		dihydrolipoamide acetyltransferase component of pyruvate dehydrogenase, putative, partial [Ricinus communis]	[C] KOG0557 Dihydrolipoamide acetyltransferase	Dihydrolipoyllysine-residue acetyltransferase component 2 of pyruvate dehydrogenase complex, mitochondrial OS=Arabidopsis thaliana GN=At3g13930 PE=1 SV=2	GO:0004739//pyruvate dehydrogenase (acetyl-transferring) activity;GO:0006086//acetyl-CoA biosynthetic process from pyruvate
CL8892.Contig1_All	1142	ko01200//Carbon metabolism;ko01100//Metabolic pathways;ko00710//Carbon fixation in photosynthetic organisms;ko01230//Biosynthesis of amino acids;ko01110//Biosynthesis of secondary metabolites;ko00051//Fructose and mannose metabolism;ko00010//Glycolysis / Gluconeogenesis;ko00562//Inositol phosphate metabolism	Metabolism	Energy metabolism;Carbohydrate metabolism;Global and overview maps	-4.68172	0.000393544	0.000282918	K01803//triosephosphate isomerase (TIM) [EC:5.3.1.1]+ko00010//Glycolysis / Gluconeogenesis+ko01230//Biosynthesis of amino acids+ko01100//Metabolic pathways+ko00051//Fructose and mannose metabolism+ko01110//Biosynthesis of secondary metabolites+ko00710//Carbon fixation in photosynthetic organisms+ko01200//Carbon metabolism+ko00562//Inositol phosphate metabolism;K22063//iron-sulfur cluster assembly…	Triosephosphate isomerase		Triosephosphate isomerase [Ostreococcus tauri]	[P] KOG1120 Fe-S cluster biosynthesis protein ISA1 (contains a HesB-like domain)	Iron-sulfur assembly protein IscA-like 1, mitochondrial OS=Arabidopsis thaliana GN=At2g16710 PE=2 SV=2	GO:0006098//pentose-phosphate shunt;GO:0006094//gluconeogenesis;GO:0006096//glycolytic process;GO:0004807//triose-phosphate isomerase activity
Unigene20884_All	432	ko00710//Carbon fixation in photosynthetic organisms;ko01230//Biosynthesis of amino acids;ko01100//Metabolic pathways;ko00010//Glycolysis / Gluconeogenesis;ko01110//Biosynthesis of secondary metabolites;ko01200//Carbon metabolism;ko00970//Aminoacyl-tRNA biosynthesis	Metabolism;Genetic Information Processing	Global and overview maps;Carbohydrate metabolism;Energy metabolism;Translation	-4.73484	0.000298398	0.000210881	K01869//leucyl-tRNA synthetase [EC:6.1.1.4]+ko00970//Aminoacyl-tRNA biosynthesis;K00134//glyceraldehyde 3-phosphate dehydrogenase [EC:1.2.1.12]+ko00010//Glycolysis / Gluconeogenesis+ko01230//Biosynthesis of amino acids+ko01100//Metabolic pathways+ko01110//Biosynthesis of secondary metabolites+ko00710//Carbon fixation in photosynthetic organisms+ko01200//Carbon metabolism;K00134//glyceraldehyde 3-…	Glyceraldehyde 3-phosphate dehydrogenase, C-terminal domain	KT588859.1 Monomorphina parapyrum culture-collection UTEX:2354 glyceraldehyde 3-phosphate dehydrogenase mRNA, partial cds	glyceraldehyde 3-phosphate dehydrogenase [Thalassiosira pseudonana CCMP1335] >EED91881.1 glyceraldehyde 3-phosphate dehydrogenase [Thalassiosira pseudonana CCMP1335]	[G] KOG0657 Glyceraldehyde 3-phosphate dehydrogenase	Glyceraldehyde-3-phosphate dehydrogenase, cytosolic OS=Ranunculus acris GN=GAPC PE=2 SV=1	GO:0006006//glucose metabolic process;GO:0016620//oxidoreductase activity, acting on the aldehyde or oxo group of donors, NAD or NADP as acceptor;GO:0004823//leucine-tRNA ligase activity;GO:0005524//ATP binding;GO:0002161//aminoacyl-tRNA editing activity;GO:0006096//glycolytic process;GO:0004807//triose-phosphate isomerase activity;GO:0006429//leucyl-tRNA aminoacylation;GO:0051287//NAD binding;GO…
Unigene61764_All	1790	ko00640//Propanoate metabolism;ko00620//Pyruvate metabolism;ko00010//Glycolysis / Gluconeogenesis;ko01100//Metabolic pathways;ko00630//Glyoxylate and dicarboxylate metabolism;ko01110//Biosynthesis of secondary metabolites;ko01200//Carbon metabolism	Metabolism	Global and overview maps;Carbohydrate metabolism	-4.78164	2.07244e-44	3.01984e-45	K01895//acetyl-CoA synthetase [EC:6.2.1.1]+ko00010//Glycolysis / Gluconeogenesis+ko00640//Propanoate metabolism+ko01100//Metabolic pathways+ko01110//Biosynthesis of secondary metabolites+ko00620//Pyruvate metabolism+ko01200//Carbon metabolism+ko00630//Glyoxylate and dicarboxylate metabolism;K01895//acetyl-CoA synthetase [EC:6.2.1.1]+ko00010//Glycolysis / Gluconeogenesis+ko00640//Propanoate metabo…	AMP-binding enzyme	XM_009040531.1 Aureococcus anophagefferens hypothetical protein partial mRNA	hypothetical protein SPRG_08067 [Saprolegnia parasitica CBS 223.65] >KDO26765.1 hypothetical protein SPRG_08067 [Saprolegnia parasitica CBS 223.65]	[I] KOG1175 Acyl-CoA synthetase	Acetyl-coenzyme A synthetase, chloroplastic/glyoxysomal OS=Arabidopsis thaliana GN=ACS PE=1 SV=1	GO:0008152//metabolic process;GO:0003824//catalytic activity
CL7257.Contig1_All	2468	ko00710//Carbon fixation in photosynthetic organisms;ko01100//Metabolic pathways;ko01200//Carbon metabolism;ko00620//Pyruvate metabolism;ko00020//Citrate cycle (TCA cycle);ko00010//Glycolysis / Gluconeogenesis;ko01110//Biosynthesis of secondary metabolites	Metabolism	Global and overview maps;Carbohydrate metabolism;Energy metabolism	-4.83422	1.21075e-260	4.70462e-262	K01610//phosphoenolpyruvate carboxykinase (ATP) [EC:4.1.1.49]+ko00010//Glycolysis / Gluconeogenesis+ko00020//Citrate cycle (TCA cycle)+ko01100//Metabolic pathways+ko01110//Biosynthesis of secondary metabolites+ko00710//Carbon fixation in photosynthetic organisms+ko00620//Pyruvate metabolism+ko01200//Carbon metabolism;K01610//phosphoenolpyruvate carboxykinase (ATP) [EC:4.1.1.49]+ko00010//Glycolysi…	Phosphoenolpyruvate carboxykinase		phosphoenolpyruvate carboxykinase [Nannochloropsis gaditana]	[C] TWOG0797 Phosphoenolpyruvate carboxykinase (ATP)	Phosphoenolpyruvate carboxykinase (ATP) OS=Zea mays PE=2 SV=1	GO:0005524//ATP binding;GO:0006094//gluconeogenesis;GO:0016301//kinase activity;GO:0005829//cytosol;GO:0004612//phosphoenolpyruvate carboxykinase (ATP) activity
Unigene68040_All	502	ko00280//Valine, leucine and isoleucine degradation;ko00630//Glyoxylate and dicarboxylate metabolism;ko01110//Biosynthesis of secondary metabolites;ko00020//Citrate cycle (TCA cycle);ko00640//Propanoate metabolism;ko00010//Glycolysis / Gluconeogenesis;ko00260//Glycine, serine and threonine metabolism;ko01200//Carbon metabolism;ko01100//Metabolic pathways;ko00620//Pyruvate metabolism	Metabolism	Amino acid metabolism;Global and overview maps;Carbohydrate metabolism	-4.84176	0.000167012	0.00011332	K00382//dihydrolipoamide dehydrogenase [EC:1.8.1.4]+ko00010//Glycolysis / Gluconeogenesis+ko00020//Citrate cycle (TCA cycle)+ko00280//Valine, leucine and isoleucine degradation+ko00640//Propanoate metabolism+ko01100//Metabolic pathways+ko01110//Biosynthesis of secondary metabolites+ko00260//Glycine, serine and threonine metabolism+ko00620//Pyruvate metabolism+ko01200//Carbon metabolism+ko00630//G…	Pyridine nucleotide-disulphide oxidoreductase, dimerisation domain		dihydrolipoyl dehydrogenase [Chlamydomonas reinhardtii] >EDP01871.1 dihydrolipoyl dehydrogenase [Chlamydomonas reinhardtii]	[C] KOG1335 Dihydrolipoamide dehydrogenase	Dihydrolipoyl dehydrogenase 2, mitochondrial OS=Arabidopsis thaliana GN=LPD2 PE=1 SV=1	GO:0009055//electron transfer activity;GO:0004148//dihydrolipoyl dehydrogenase activity;GO:0005623//cell;GO:0050660//flavin adenine dinucleotide binding;GO:0045454//cell redox homeostasis
Unigene70176_All	482	ko00260//Glycine, serine and threonine metabolism;ko01200//Carbon metabolism;ko01110//Biosynthesis of secondary metabolites;ko00630//Glyoxylate and dicarboxylate metabolism;ko00280//Valine, leucine and isoleucine degradation;ko00010//Glycolysis / Gluconeogenesis;ko00640//Propanoate metabolism;ko01100//Metabolic pathways;ko00620//Pyruvate metabolism;ko00020//Citrate cycle (TCA cycle)	Metabolism	Global and overview maps;Amino acid metabolism;Carbohydrate metabolism	-4.84176	0.000167012	0.00011332	K00382//dihydrolipoamide dehydrogenase [EC:1.8.1.4]+ko00010//Glycolysis / Gluconeogenesis+ko00020//Citrate cycle (TCA cycle)+ko00280//Valine, leucine and isoleucine degradation+ko00640//Propanoate metabolism+ko01100//Metabolic pathways+ko01110//Biosynthesis of secondary metabolites+ko00260//Glycine, serine and threonine metabolism+ko00620//Pyruvate metabolism+ko01200//Carbon metabolism+ko00630//G…	Pyridine nucleotide-disulphide oxidoreductase		predicted protein [Hordeum vulgare subsp. vulgare]	[C] KOG1335 Dihydrolipoamide dehydrogenase	Leghemoglobin reductase OS=Vigna unguiculata GN=FLBR PE=1 SV=1	GO:0009055//electron transfer activity;GO:0004148//dihydrolipoyl dehydrogenase activity;GO:0005623//cell;GO:0050660//flavin adenine dinucleotide binding;GO:0045454//cell redox homeostasis
Unigene73253_All	364	ko00020//Citrate cycle (TCA cycle);ko00270//Cysteine and methionine metabolism;ko01100//Metabolic pathways;ko01200//Carbon metabolism;ko00710//Carbon fixation in photosynthetic organisms;ko00640//Propanoate metabolism;ko00620//Pyruvate metabolism;ko01110//Biosynthesis of secondary metabolites;ko00630//Glyoxylate and dicarboxylate metabolism;ko00010//Glycolysis / Gluconeogenesis	Metabolism	Carbohydrate metabolism;Global and overview maps;Amino acid metabolism;Energy metabolism	-4.84176	0.000167012	0.00011332	K00016//L-lactate dehydrogenase [EC:1.1.1.27]+ko00010//Glycolysis / Gluconeogenesis+ko00640//Propanoate metabolism+ko01100//Metabolic pathways+ko01110//Biosynthesis of secondary metabolites+ko00620//Pyruvate metabolism+ko00270//Cysteine and methionine metabolism;K00016//L-lactate dehydrogenase [EC:1.1.1.27]+ko00010//Glycolysis / Gluconeogenesis+ko00640//Propanoate metabolism+ko01100//Metabolic pa…	lactate/malate dehydrogenase, NAD binding domain		RecName: Full=L-lactate dehydrogenase; Short=LDH >AAB38970.1 malate dehydrogenase [Botryococcus braunii]	[C] KOG1494 NAD-dependent malate dehydrogenase	L-lactate dehydrogenase OS=Botryococcus braunii PE=1 SV=1	GO:0019752//carboxylic acid metabolic process;GO:0005975//carbohydrate metabolic process;GO:0004459//L-lactate dehydrogenase activity;GO:0005737//cytoplasm
Unigene64005_All	423	ko00010//Glycolysis / Gluconeogenesis;ko00710//Carbon fixation in photosynthetic organisms;ko01110//Biosynthesis of secondary metabolites;ko01200//Carbon metabolism;ko00620//Pyruvate metabolism;ko00020//Citrate cycle (TCA cycle);ko01100//Metabolic pathways	Metabolism	Carbohydrate metabolism;Energy metabolism;Global and overview maps	-4.9413	9.37088e-05	6.12248e-05	K01610//phosphoenolpyruvate carboxykinase (ATP) [EC:4.1.1.49]+ko00010//Glycolysis / Gluconeogenesis+ko00020//Citrate cycle (TCA cycle)+ko01100//Metabolic pathways+ko01110//Biosynthesis of secondary metabolites+ko00710//Carbon fixation in photosynthetic organisms+ko00620//Pyruvate metabolism+ko01200//Carbon metabolism;K01610//phosphoenolpyruvate carboxykinase (ATP) [EC:4.1.1.49]+ko00010//Glycolysi…	Phosphoenolpyruvate carboxykinase		phosphoenolpyruvate carboxykinase [ATP] [Saprolegnia diclina VS20] >EQC38163.1 phosphoenolpyruvate carboxykinase [ATP] [Saprolegnia diclina VS20]		Phosphoenolpyruvate carboxykinase (ATP) 1 OS=Urochloa panicoides GN=PCK1 PE=1 SV=1	GO:0005524//ATP binding;GO:0006094//gluconeogenesis;GO:0016301//kinase activity;GO:0004612//phosphoenolpyruvate carboxykinase (ATP) activity
Unigene71126_All	566	ko01110//Biosynthesis of secondary metabolites;ko00052//Galactose metabolism;ko01100//Metabolic pathways;ko00010//Glycolysis / Gluconeogenesis	Metabolism	Carbohydrate metabolism;Global and overview maps	-4.9413	9.37088e-05	6.12248e-05	K11804//WD repeat-containing protein 42A;K01785//aldose 1-epimerase [EC:5.1.3.3]+ko00010//Glycolysis / Gluconeogenesis+ko01100//Metabolic pathways+ko00052//Galactose metabolism+ko01110//Biosynthesis of secondary metabolites	Peptidase propeptide and YPEB domain	HG975447.1 Solanum pennellii chromosome ch08, complete genome	hypothetical protein GUITHDRAFT_105229 [Guillardia theta CCMP2712] >EKX49153.1 hypothetical protein GUITHDRAFT_105229 [Guillardia theta CCMP2712]	[S] LSE0402 A Uncharacterized protein	Acidic leucine-rich nuclear phosphoprotein 32-related protein 1 OS=Oryza sativa subsp. japonica GN=Os07g0607800 PE=2 SV=1	GO:0005509//calcium ion binding
CL3230.Contig4_All	623	ko00562//Inositol phosphate metabolism;ko01100//Metabolic pathways;ko00010//Glycolysis / Gluconeogenesis;ko01110//Biosynthesis of secondary metabolites;ko00710//Carbon fixation in photosynthetic organisms;ko00051//Fructose and mannose metabolism;ko01230//Biosynthesis of amino acids;ko01200//Carbon metabolism	Metabolism	Carbohydrate metabolism;Global and overview maps;Energy metabolism	-4.94322	9.2936e-05	6.04787e-05	K01803//triosephosphate isomerase (TIM) [EC:5.3.1.1]+ko00010//Glycolysis / Gluconeogenesis+ko01230//Biosynthesis of amino acids+ko01100//Metabolic pathways+ko00051//Fructose and mannose metabolism+ko01110//Biosynthesis of secondary metabolites+ko00710//Carbon fixation in photosynthetic organisms+ko01200//Carbon metabolism+ko00562//Inositol phosphate metabolism	C2 domain		C2 domain-containing Hypothetical protein [Phytophthora megakarya]	[TU] KOG1028 Ca2+-dependent phospholipid-binding protein Synaptotagmin, required for synaptic vesicle and secretory granule exocytosis	Synaptotagmin-5 OS=Arabidopsis thaliana GN=SYT5 PE=2 SV=1	GO:0005783//endoplasmic reticulum
Unigene63163_All	648	ko01100//Metabolic pathways;ko00710//Carbon fixation in photosynthetic organisms;ko01110//Biosynthesis of secondary metabolites;ko00010//Glycolysis / Gluconeogenesis;ko00620//Pyruvate metabolism;ko00020//Citrate cycle (TCA cycle);ko01200//Carbon metabolism	Metabolism	Global and overview maps;Energy metabolism;Carbohydrate metabolism	-5.0344	9.99387e-09	4.38523e-09	K01610//phosphoenolpyruvate carboxykinase (ATP) [EC:4.1.1.49]+ko00010//Glycolysis / Gluconeogenesis+ko00020//Citrate cycle (TCA cycle)+ko01100//Metabolic pathways+ko01110//Biosynthesis of secondary metabolites+ko00710//Carbon fixation in photosynthetic organisms+ko00620//Pyruvate metabolism+ko01200//Carbon metabolism;K01610//phosphoenolpyruvate carboxykinase (ATP) [EC:4.1.1.49]+ko00010//Glycolysi…	Phosphoenolpyruvate carboxykinase		phosphoenolpyruvate carboxykinase (ATP) [Aphanomyces astaci] >ETV79595.1 phosphoenolpyruvate carboxykinase (ATP) [Aphanomyces astaci]	[C] TWOG0797 Phosphoenolpyruvate carboxykinase (ATP)	Phosphoenolpyruvate carboxykinase (ATP) 2 OS=Urochloa panicoides GN=PCK2 PE=2 SV=1	GO:0005524//ATP binding;GO:0006094//gluconeogenesis;GO:0016301//kinase activity;GO:0004612//phosphoenolpyruvate carboxykinase (ATP) activity
Unigene65028_All	606	ko00270//Cysteine and methionine metabolism;ko01100//Metabolic pathways;ko00640//Propanoate metabolism;ko01110//Biosynthesis of secondary metabolites;ko00010//Glycolysis / Gluconeogenesis;ko00620//Pyruvate metabolism	Metabolism	Amino acid metabolism;Carbohydrate metabolism;Global and overview maps	-5.0344	5.26998e-05	3.32497e-05	K00016//L-lactate dehydrogenase [EC:1.1.1.27]+ko00010//Glycolysis / Gluconeogenesis+ko00640//Propanoate metabolism+ko01100//Metabolic pathways+ko01110//Biosynthesis of secondary metabolites+ko00620//Pyruvate metabolism+ko00270//Cysteine and methionine metabolism;K00016//L-lactate dehydrogenase [EC:1.1.1.27]+ko00010//Glycolysis / Gluconeogenesis+ko00640//Propanoate metabolism+ko01100//Metabolic pa…	lactate/malate dehydrogenase, NAD binding domain		PREDICTED: L-lactate dehydrogenase B [Malus domestica]	[C] KOG1495 Lactate dehydrogenase	L-lactate dehydrogenase B (Fragment) OS=Hordeum vulgare PE=1 SV=1	GO:0019752//carboxylic acid metabolic process;GO:0005975//carbohydrate metabolic process;GO:0004459//L-lactate dehydrogenase activity;GO:0005737//cytoplasm
Unigene75925_All	395	ko00710//Carbon fixation in photosynthetic organisms;ko01100//Metabolic pathways;ko01200//Carbon metabolism;ko01110//Biosynthesis of secondary metabolites;ko00051//Fructose and mannose metabolism;ko00030//Pentose phosphate pathway;ko00010//Glycolysis / Gluconeogenesis;ko01230//Biosynthesis of amino acids	Metabolism	Energy metabolism;Carbohydrate metabolism;Global and overview maps	-5.0344	5.26998e-05	3.32497e-05	K01624//fructose-bisphosphate aldolase, class II [EC:4.1.2.13]+ko00010//Glycolysis / Gluconeogenesis+ko00030//Pentose phosphate pathway+ko01230//Biosynthesis of amino acids+ko01100//Metabolic pathways+ko00051//Fructose and mannose metabolism+ko01110//Biosynthesis of secondary metabolites+ko00710//Carbon fixation in photosynthetic organisms+ko01200//Carbon metabolism;K01624//fructose-bisphosphate …	Fructose-bisphosphate aldolase class-II		PREDICTED: uncharacterized protein LOC101255484 [Solanum lycopersicum]	[G] KOG4153 Fructose 1,6-bisphosphate aldolase		GO:0004332//fructose-bisphosphate aldolase activity;GO:0006096//glycolytic process;GO:0008270//zinc ion binding
Unigene88314_All	657	ko00260//Glycine, serine and threonine metabolism;ko01100//Metabolic pathways;ko00010//Glycolysis / Gluconeogenesis;ko01110//Biosynthesis of secondary metabolites;ko00280//Valine, leucine and isoleucine degradation;ko01200//Carbon metabolism;ko00020//Citrate cycle (TCA cycle);ko00630//Glyoxylate and dicarboxylate metabolism;ko00620//Pyruvate metabolism;ko00640//Propanoate metabolism	Metabolism	Carbohydrate metabolism;Amino acid metabolism;Global and overview maps	-5.0344	5.26998e-05	3.32497e-05	K00382//dihydrolipoamide dehydrogenase [EC:1.8.1.4]+ko00010//Glycolysis / Gluconeogenesis+ko00020//Citrate cycle (TCA cycle)+ko00280//Valine, leucine and isoleucine degradation+ko00640//Propanoate metabolism+ko01100//Metabolic pathways+ko01110//Biosynthesis of secondary metabolites+ko00260//Glycine, serine and threonine metabolism+ko00620//Pyruvate metabolism+ko01200//Carbon metabolism+ko00630//G…	Pyridine nucleotide-disulphide oxidoreductase	XM_009038789.1 Aureococcus anophagefferens hypothetical protein partial mRNA	dihydrolipoyl dehydrogenase [Nannochloropsis gaditana]	[C] KOG1335 Dihydrolipoamide dehydrogenase	Dihydrolipoyl dehydrogenase 1, mitochondrial OS=Arabidopsis thaliana GN=LPD1 PE=1 SV=2	GO:0009055//electron transfer activity;GO:0004148//dihydrolipoyl dehydrogenase activity;GO:0005623//cell;GO:0050660//flavin adenine dinucleotide binding;GO:0045454//cell redox homeostasis
Unigene60346_All	704	ko00010//Glycolysis / Gluconeogenesis;ko01200//Carbon metabolism;ko00620//Pyruvate metabolism;ko01100//Metabolic pathways;ko00640//Propanoate metabolism;ko00630//Glyoxylate and dicarboxylate metabolism;ko01110//Biosynthesis of secondary metabolites	Metabolism	Global and overview maps;Carbohydrate metabolism	-5.0788	5.61589e-09	2.42483e-09	K01895//acetyl-CoA synthetase [EC:6.2.1.1]+ko00010//Glycolysis / Gluconeogenesis+ko00640//Propanoate metabolism+ko01100//Metabolic pathways+ko01110//Biosynthesis of secondary metabolites+ko00620//Pyruvate metabolism+ko01200//Carbon metabolism+ko00630//Glyoxylate and dicarboxylate metabolism;K01895//acetyl-CoA synthetase [EC:6.2.1.1]+ko00010//Glycolysis / Gluconeogenesis+ko00640//Propanoate metabo…	Response regulator receiver domain		acetyl-CoA synthetase [Fistulifera solaris]	[I] KOG1175 Acyl-CoA synthetase		GO:0019427//acetyl-CoA biosynthetic process from acetate;GO:0003987//acetate-CoA ligase activity;GO:0005524//ATP binding;GO:0016208//AMP binding
Unigene39961_All	2580	ko01200//Carbon metabolism;ko00010//Glycolysis / Gluconeogenesis;ko00710//Carbon fixation in photosynthetic organisms;ko01110//Biosynthesis of secondary metabolites;ko01100//Metabolic pathways;ko01230//Biosynthesis of amino acids	Metabolism	Global and overview maps;Carbohydrate metabolism;Energy metabolism	-5.10215	2.63519e-103	2.10357e-104	K00927//phosphoglycerate kinase [EC:2.7.2.3]+ko00010//Glycolysis / Gluconeogenesis+ko01230//Biosynthesis of amino acids+ko01100//Metabolic pathways+ko01110//Biosynthesis of secondary metabolites+ko00710//Carbon fixation in photosynthetic organisms+ko01200//Carbon metabolism;K00927//phosphoglycerate kinase [EC:2.7.2.3]+ko00010//Glycolysis / Gluconeogenesis+ko01230//Biosynthesis of amino acids+ko01…	Phosphoglycerate kinase		phosphoglycerate kinase, cytosolic-like [Sesamum indicum] >XP_011095717.1 phosphoglycerate kinase, cytosolic-like [Sesamum indicum] >XP_011095718.1 phosphoglycerate kinase, cytosolic-like [Sesamum indicum]	[G] KOG0657 Glyceraldehyde 3-phosphate dehydrogenase	Phosphoglycerate kinase, cytosolic OS=Triticum aestivum PE=2 SV=1
CL6945.Contig2_All	843	ko01200//Carbon metabolism;ko00010//Glycolysis / Gluconeogenesis;ko00350//Tyrosine metabolism;ko01100//Metabolic pathways;ko00071//Fatty acid degradation;ko01110//Biosynthesis of secondary metabolites	Metabolism	Lipid metabolism;Global and overview maps;Amino acid metabolism;Carbohydrate metabolism	-5.12187	2.96514e-05	1.81461e-05	K00121//S-(hydroxymethyl)glutathione dehydrogenase / alcohol dehydrogenase [EC:1.1.1.284 1.1.1.1]+ko00010//Glycolysis / Gluconeogenesis+ko00350//Tyrosine metabolism+ko01100//Metabolic pathways+ko01110//Biosynthesis of secondary metabolites+ko00071//Fatty acid degradation+ko01200//Carbon metabolism;K00121//S-(hydroxymethyl)glutathione dehydrogenase / alcohol dehydrogenase [EC:1.1.1.284 1.1.1.1]+ko…	Zinc-binding dehydrogenase		hypothetical protein F511_29957 [Dorcoceras hygrometricum]	[Q] KOG0022 Alcohol dehydrogenase, class III	Alcohol dehydrogenase class-3 OS=Oryza sativa subsp. indica GN=ADHIII PE=3 SV=1	GO:0006069//ethanol oxidation;GO:0008270//zinc ion binding;GO:0051903//S-(hydroxymethyl)glutathione dehydrogenase activity
Unigene16442_All	1050	ko01100//Metabolic pathways;ko01230//Biosynthesis of amino acids;ko00030//Pentose phosphate pathway;ko00710//Carbon fixation in photosynthetic organisms;ko00010//Glycolysis / Gluconeogenesis;ko01110//Biosynthesis of secondary metabolites;ko00051//Fructose and mannose metabolism;ko01200//Carbon metabolism	Metabolism	Carbohydrate metabolism;Energy metabolism;Global and overview maps	-5.12187	4.33835e-33	7.85989e-34	K01623//fructose-bisphosphate aldolase, class I [EC:4.1.2.13]+ko00010//Glycolysis / Gluconeogenesis+ko00030//Pentose phosphate pathway+ko01230//Biosynthesis of amino acids+ko01100//Metabolic pathways+ko00051//Fructose and mannose metabolism+ko01110//Biosynthesis of secondary metabolites+ko00710//Carbon fixation in photosynthetic organisms+ko01200//Carbon metabolism;K01623//fructose-bisphosphate a…	Fructose-bisphosphate aldolase class-I	CP019094.1 Spirodela polyrhiza strain 9509 chromosome 2 sequence	hypothetical protein Ctob_009975 [Chrysochromulina sp. CCMP291]	[G] KOG1557 Fructose-biphosphate aldolase	Fructose-bisphosphate aldolase 2, chloroplastic OS=Arabidopsis thaliana GN=FBA2 PE=1 SV=2	GO:0004332//fructose-bisphosphate aldolase activity;GO:0006096//glycolytic process
Unigene47748_All	520	ko01100//Metabolic pathways;ko01200//Carbon metabolism;ko00010//Glycolysis / Gluconeogenesis;ko01110//Biosynthesis of secondary metabolites;ko00640//Propanoate metabolism;ko00620//Pyruvate metabolism;ko00630//Glyoxylate and dicarboxylate metabolism	Metabolism	Carbohydrate metabolism;Global and overview maps	-5.20433	1.67523e-05	9.94983e-06	K01895//acetyl-CoA synthetase [EC:6.2.1.1]+ko00010//Glycolysis / Gluconeogenesis+ko00640//Propanoate metabolism+ko01100//Metabolic pathways+ko01110//Biosynthesis of secondary metabolites+ko00620//Pyruvate metabolism+ko01200//Carbon metabolism+ko00630//Glyoxylate and dicarboxylate metabolism;K01895//acetyl-CoA synthetase [EC:6.2.1.1]+ko00010//Glycolysis / Gluconeogenesis+ko00640//Propanoate metabo…	AMP-binding enzyme	XM_014050139.1 Monoraphidium neglectum acetyl-CoA synthetase mRNA	acetyl-coenzyme A synthetase, chloroplastic/glyoxysomal-like [Dorcoceras hygrometricum]	[I] KOG1175 Acyl-CoA synthetase	Acetyl-coenzyme A synthetase, chloroplastic/glyoxysomal OS=Arabidopsis thaliana GN=ACS PE=1 SV=1	GO:0019427//acetyl-CoA biosynthetic process from acetate;GO:0003987//acetate-CoA ligase activity;GO:0005524//ATP binding;GO:0016208//AMP binding
CL37.Contig2_All	1161	ko01110//Biosynthesis of secondary metabolites;ko00020//Citrate cycle (TCA cycle);ko01100//Metabolic pathways;ko00010//Glycolysis / Gluconeogenesis;ko00620//Pyruvate metabolism;ko01200//Carbon metabolism	Metabolism	Carbohydrate metabolism;Global and overview maps	-5.4687	2.17921e-06	1.17186e-06	K00162//pyruvate dehydrogenase E1 component beta subunit [EC:1.2.4.1]+ko00010//Glycolysis / Gluconeogenesis+ko00020//Citrate cycle (TCA cycle)+ko01100//Metabolic pathways+ko01110//Biosynthesis of secondary metabolites+ko00620//Pyruvate metabolism+ko01200//Carbon metabolism;K00162//pyruvate dehydrogenase E1 component beta subunit [EC:1.2.4.1]+ko00010//Glycolysis / Gluconeogenesis+ko00020//Citrate …	Transketolase, C-terminal domain		pyruvate dehydrogenase E1 component beta subunit mitochondrial precursor [Ostreococcus tauri]	[C] KOG0524 Pyruvate dehydrogenase E1, beta subunit	Pyruvate dehydrogenase E1 component subunit beta-1, mitochondrial OS=Arabidopsis thaliana GN=PDH2 PE=1 SV=2	GO:0005759//mitochondrial matrix;GO:0006096//glycolytic process;GO:0004739//pyruvate dehydrogenase (acetyl-transferring) activity;GO:0006086//acetyl-CoA biosynthetic process from pyruvate
Unigene62237_All	761	ko00260//Glycine, serine and threonine metabolism;ko00280//Valine, leucine and isoleucine degradation;ko00020//Citrate cycle (TCA cycle);ko00630//Glyoxylate and dicarboxylate metabolism;ko01110//Biosynthesis of secondary metabolites;ko00010//Glycolysis / Gluconeogenesis;ko00640//Propanoate metabolism;ko00620//Pyruvate metabolism;ko01200//Carbon metabolism;ko01100//Metabolic pathways	Metabolism	Global and overview maps;Carbohydrate metabolism;Amino acid metabolism	-5.49384	1.76295e-06	9.3908e-07	K00382//dihydrolipoamide dehydrogenase [EC:1.8.1.4]+ko00010//Glycolysis / Gluconeogenesis+ko00020//Citrate cycle (TCA cycle)+ko00280//Valine, leucine and isoleucine degradation+ko00640//Propanoate metabolism+ko01100//Metabolic pathways+ko01110//Biosynthesis of secondary metabolites+ko00260//Glycine, serine and threonine metabolism+ko00620//Pyruvate metabolism+ko01200//Carbon metabolism+ko00630//G…	Pyridine nucleotide-disulphide oxidoreductase		dihydrolipoamide dehydrogenase [Galdieria sulphuraria] >EME31272.1 dihydrolipoamide dehydrogenase [Galdieria sulphuraria]	[C] KOG1335 Dihydrolipoamide dehydrogenase	Leghemoglobin reductase OS=Vigna unguiculata GN=FLBR PE=1 SV=1	GO:0009055//electron transfer activity;GO:0004148//dihydrolipoyl dehydrogenase activity;GO:0005623//cell;GO:0050660//flavin adenine dinucleotide binding;GO:0045454//cell redox homeostasis
Unigene57324_All	968	ko01110//Biosynthesis of secondary metabolites;ko01200//Carbon metabolism;ko00350//Tyrosine metabolism;ko00071//Fatty acid degradation;ko00010//Glycolysis / Gluconeogenesis;ko01100//Metabolic pathways	Metabolism	Lipid metabolism;Carbohydrate metabolism;Amino acid metabolism;Global and overview maps	-5.67826	3.34695e-07	1.66585e-07	K00121//S-(hydroxymethyl)glutathione dehydrogenase / alcohol dehydrogenase [EC:1.1.1.284 1.1.1.1]+ko00010//Glycolysis / Gluconeogenesis+ko00350//Tyrosine metabolism+ko01100//Metabolic pathways+ko01110//Biosynthesis of secondary metabolites+ko00071//Fatty acid degradation+ko01200//Carbon metabolism;K00121//S-(hydroxymethyl)glutathione dehydrogenase / alcohol dehydrogenase [EC:1.1.1.284 1.1.1.1]+ko…	Alcohol dehydrogenase GroES-like domain	XM_005648672.1 Coccomyxa subellipsoidea C-169 alcohol dehydrogenase partial mRNA	hypothetical protein F511_29957 [Dorcoceras hygrometricum]	[Q] KOG0022 Alcohol dehydrogenase, class III	Alcohol dehydrogenase class-3 OS=Zea mays GN=FDH PE=2 SV=1	GO:0006069//ethanol oxidation;GO:0008270//zinc ion binding;GO:0051903//S-(hydroxymethyl)glutathione dehydrogenase activity
Unigene43395_All	1481	ko00561//Glycerolipid metabolism;ko00053//Ascorbate and aldarate metabolism;ko00903//Limonene and pinene degradation;ko00940//Phenylpropanoid biosynthesis;ko00410//beta-Alanine metabolism;ko00620//Pyruvate metabolism;ko00071//Fatty acid degradation;ko00310//Lysine degradation;ko00330//Arginine and proline metabolism;ko01100//Metabolic pathways;ko00380//Tryptophan metabolism;ko00010//Glycolysis / …	Metabolism	Biosynthesis of other secondary metabolites;Carbohydrate metabolism;Global and overview maps;Amino acid metabolism;Lipid metabolism;Metabolism of other amino acids;Metabolism of terpenoids and polyketides	-5.69262	3.25311e-25	7.05967e-26	K00128//aldehyde dehydrogenase (NAD+) [EC:1.2.1.3]+ko00410//beta-Alanine metabolism+ko00310//Lysine degradation+ko00010//Glycolysis / Gluconeogenesis+ko00903//Limonene and pinene degradation+ko00380//Tryptophan metabolism+ko00330//Arginine and proline metabolism+ko00280//Valine, leucine and isoleucine degradation+ko01100//Metabolic pathways+ko00053//Ascorbate and aldarate metabolism+ko00340//Hist…	Aldehyde dehydrogenase family		aldehyde dehydrogenase (NAD+) [Galdieria sulphuraria] >EME26154.1 aldehyde dehydrogenase (NAD+) [Galdieria sulphuraria]	[C] KOG2450 Aldehyde dehydrogenase	Aldehyde dehydrogenase family 2 member B4, mitochondrial OS=Arabidopsis thaliana GN=ALDH2B4 PE=1 SV=1	GO:0004029//aldehyde dehydrogenase (NAD) activity;GO:0016491//oxidoreductase activity
Unigene60801_All	1340	ko01230//Biosynthesis of amino acids;ko01110//Biosynthesis of secondary metabolites;ko01200//Carbon metabolism;ko00010//Glycolysis / Gluconeogenesis;ko00230//Purine metabolism;ko00620//Pyruvate metabolism;ko01100//Metabolic pathways	Metabolism	Global and overview maps;Nucleotide metabolism;Carbohydrate metabolism	-5.86729	8.81392e-15	2.74643e-15	K00873//pyruvate kinase [EC:2.7.1.40]+ko00010//Glycolysis / Gluconeogenesis+ko00230//Purine metabolism+ko01230//Biosynthesis of amino acids+ko01100//Metabolic pathways+ko01110//Biosynthesis of secondary metabolites+ko00620//Pyruvate metabolism+ko01200//Carbon metabolism;K00873//pyruvate kinase [EC:2.7.1.40]+ko00010//Glycolysis / Gluconeogenesis+ko00230//Purine metabolism+ko01230//Biosynthesis of …	Pyruvate kinase, barrel domain		pyruvate kinase [Dictyopteris undulata]	[G] KOG2323 Pyruvate kinase	Pyruvate kinase, cytosolic isozyme OS=Nicotiana tabacum PE=2 SV=1	GO:0030955//potassium ion binding;GO:0000287//magnesium ion binding;GO:0004743//pyruvate kinase activity;GO:0016301//kinase activity
Unigene32161_All	584	ko01200//Carbon metabolism;ko00640//Propanoate metabolism;ko00620//Pyruvate metabolism;ko00130//Ubiquinone and other terpenoid-quinone biosynthesis;ko00940//Phenylpropanoid biosynthesis;ko00010//Glycolysis / Gluconeogenesis;ko01100//Metabolic pathways;ko04146//Peroxisome;ko00071//Fatty acid degradation;ko01212//Fatty acid metabolism;ko00061//Fatty acid biosynthesis;ko00360//Phenylalanine metaboli…	Cellular Processes;Metabolism	Global and overview maps;Transport and catabolism;Metabolism of cofactors and vitamins;Carbohydrate metabolism;Lipid metabolism;Biosynthesis of other secondary metabolites;Amino acid metabolism	-5.9413	2.21266e-08	9.98444e-09	K01897//long-chain acyl-CoA synthetase [EC:6.2.1.3]+ko04146//Peroxisome+ko01100//Metabolic pathways+ko00061//Fatty acid biosynthesis+ko01212//Fatty acid metabolism+ko00071//Fatty acid degradation;K01904//4-coumarate--CoA ligase [EC:6.2.1.12]+ko00130//Ubiquinone and other terpenoid-quinone biosynthesis+ko01100//Metabolic pathways+ko01110//Biosynthesis of secondary metabolites+ko00940//Phenylpropan…	AMP-binding enzyme		hypothetical protein H257_06740 [Aphanomyces astaci] >ETV80469.1 hypothetical protein H257_06740 [Aphanomyces astaci]	[AR] KOG2146 Splicing coactivator SRm160/300, subunit SRm160 (contains PWI domain)
CL6945.Contig1_All	976	ko00010//Glycolysis / Gluconeogenesis;ko01100//Metabolic pathways;ko01200//Carbon metabolism;ko00071//Fatty acid degradation;ko01110//Biosynthesis of secondary metabolites;ko00350//Tyrosine metabolism	Metabolism	Carbohydrate metabolism;Lipid metabolism;Global and overview maps;Amino acid metabolism	-5.97692	2.09703e-30	4.02025e-31	K00121//S-(hydroxymethyl)glutathione dehydrogenase / alcohol dehydrogenase [EC:1.1.1.284 1.1.1.1]+ko00010//Glycolysis / Gluconeogenesis+ko00350//Tyrosine metabolism+ko01100//Metabolic pathways+ko01110//Biosynthesis of secondary metabolites+ko00071//Fatty acid degradation+ko01200//Carbon metabolism;K00121//S-(hydroxymethyl)glutathione dehydrogenase / alcohol dehydrogenase [EC:1.1.1.284 1.1.1.1]+ko…	Alcohol dehydrogenase GroES-like domain		hypothetical protein F511_29957 [Dorcoceras hygrometricum]	[Q] KOG0022 Alcohol dehydrogenase, class III	Alcohol dehydrogenase class-3 OS=Oryza sativa subsp. indica GN=ADHIII PE=3 SV=1	GO:0006069//ethanol oxidation;GO:0008270//zinc ion binding;GO:0051903//S-(hydroxymethyl)glutathione dehydrogenase activity
Unigene66073_All	2338	ko01100//Metabolic pathways;ko01200//Carbon metabolism;ko01230//Biosynthesis of amino acids;ko01110//Biosynthesis of secondary metabolites;ko03018//RNA degradation;ko00010//Glycolysis / Gluconeogenesis	Genetic Information Processing;Metabolism	Carbohydrate metabolism;Global and overview maps;Folding, sorting and degradation	-6.04003	3.92401e-62	4.51667e-63	K01689//enolase [EC:4.2.1.11]+ko00010//Glycolysis / Gluconeogenesis+ko01230//Biosynthesis of amino acids+ko03018//RNA degradation+ko01100//Metabolic pathways+ko01110//Biosynthesis of secondary metabolites+ko01200//Carbon metabolism;K01689//enolase [EC:4.2.1.11]+ko00010//Glycolysis / Gluconeogenesis+ko01230//Biosynthesis of amino acids+ko03018//RNA degradation+ko01100//Metabolic pathways+ko01110//…	Enolase, C-terminal TIM barrel domain		enolase (plastid) [Paulinella micropora]	[G] KOG2670 Enolase	Enolase OS=Oryza sativa subsp. japonica GN=ENO1 PE=1 SV=2	GO:0000287//magnesium ion binding;GO:0004634//phosphopyruvate hydratase activity;GO:0006096//glycolytic process;GO:0000015//phosphopyruvate hydratase complex;GO:0009536//plastid
Unigene71239_All	4196	ko01100//Metabolic pathways;ko00500//Starch and sucrose metabolism;ko00010//Glycolysis / Gluconeogenesis;ko00030//Pentose phosphate pathway;ko01200//Carbon metabolism;ko00520//Amino sugar and nucleotide sugar metabolism;ko01110//Biosynthesis of secondary metabolites	Metabolism	Carbohydrate metabolism;Global and overview maps	-6.09385	1.18343e-206	5.53151e-208	K01810//glucose-6-phosphate isomerase [EC:5.3.1.9]+ko00010//Glycolysis / Gluconeogenesis+ko00030//Pentose phosphate pathway+ko00520//Amino sugar and nucleotide sugar metabolism+ko01100//Metabolic pathways+ko00500//Starch and sucrose metabolism+ko01110//Biosynthesis of secondary metabolites+ko01200//Carbon metabolism;K01810//glucose-6-phosphate isomerase [EC:5.3.1.9]+ko00010//Glycolysis / Gluconeo…	Phosphoglucose isomerase	KY085906.1 Piper auritum plastid, complete genome	cytosolic glucose-6-phosphate isomerase [Pavlova lutheri]	[G] KOG2446 Glucose-6-phosphate isomerase	Glucose-6-phosphate isomerase, cytosolic OS=Spinacia oleracea GN=PGIC PE=2 SV=2	GO:0004347//glucose-6-phosphate isomerase activity;GO:0006094//gluconeogenesis;GO:0006096//glycolytic process
Unigene47069_All	537	ko00230//Purine metabolism;ko01100//Metabolic pathways;ko00030//Pentose phosphate pathway;ko00520//Amino sugar and nucleotide sugar metabolism;ko00052//Galactose metabolism;ko00500//Starch and sucrose metabolism;ko00010//Glycolysis / Gluconeogenesis;ko01110//Biosynthesis of secondary metabolites	Metabolism	Global and overview maps;Carbohydrate metabolism;Nucleotide metabolism	-6.16369	1.55416e-09	6.44632e-10	K15779//phosphoglucomutase / phosphopentomutase [EC:5.4.2.2 5.4.2.7]+ko00010//Glycolysis / Gluconeogenesis+ko00230//Purine metabolism+ko00030//Pentose phosphate pathway+ko00520//Amino sugar and nucleotide sugar metabolism+ko01100//Metabolic pathways+ko00052//Galactose metabolism+ko00500//Starch and sucrose metabolism+ko01110//Biosynthesis of secondary metabolites;K01835//phosphoglucomutase [EC:5.…	Phosphoglucomutase/phosphomannomutase, alpha/beta/alpha domain I		hypothetical protein GPECTOR_68g394 [Gonium pectorale]	[G] KOG1220 Phosphoglucomutase/phosphomannomutase		GO:0000287//magnesium ion binding;GO:0005975//carbohydrate metabolic process;GO:0004614//phosphoglucomutase activity;GO:0016868//intramolecular transferase activity, phosphotransferases
Unigene87742_All	700	ko00051//Fructose and mannose metabolism;ko01230//Biosynthesis of amino acids;ko01100//Metabolic pathways;ko00010//Glycolysis / Gluconeogenesis;ko01110//Biosynthesis of secondary metabolites;ko00710//Carbon fixation in photosynthetic organisms;ko00030//Pentose phosphate pathway;ko01200//Carbon metabolism	Metabolism	Carbohydrate metabolism;Global and overview maps;Energy metabolism	-6.20433	9.19448e-10	3.75671e-10	K01623//fructose-bisphosphate aldolase, class I [EC:4.1.2.13]+ko00010//Glycolysis / Gluconeogenesis+ko00030//Pentose phosphate pathway+ko01230//Biosynthesis of amino acids+ko01100//Metabolic pathways+ko00051//Fructose and mannose metabolism+ko01110//Biosynthesis of secondary metabolites+ko00710//Carbon fixation in photosynthetic organisms+ko01200//Carbon metabolism;K01623//fructose-bisphosphate a…	Fructose-bisphosphate aldolase class-I	XM_010046951.2 PREDICTED: Eucalyptus grandis fructose-bisphosphate aldolase 6, cytosolic (LOC104434011), mRNA	PREDICTED: fructose-bisphosphate aldolase 6, cytosolic [Ipomoea nil]	[G] KOG1557 Fructose-biphosphate aldolase	Fructose-bisphosphate aldolase 6, cytosolic OS=Arabidopsis thaliana GN=FBA6 PE=1 SV=1	GO:0004332//fructose-bisphosphate aldolase activity;GO:0006096//glycolytic process
Unigene20590_All	870	ko01100//Metabolic pathways;ko01200//Carbon metabolism;ko01230//Biosynthesis of amino acids;ko01110//Biosynthesis of secondary metabolites;ko00260//Glycine, serine and threonine metabolism;ko00010//Glycolysis / Gluconeogenesis	Metabolism	Amino acid metabolism;Carbohydrate metabolism;Global and overview maps	-6.31981	1.92592e-10	7.5471e-11	K15634//probable phosphoglycerate mutase [EC:5.4.2.12]+ko00010//Glycolysis / Gluconeogenesis+ko01230//Biosynthesis of amino acids+ko01100//Metabolic pathways+ko01110//Biosynthesis of secondary metabolites+ko00260//Glycine, serine and threonine metabolism+ko01200//Carbon metabolism;K15634//probable phosphoglycerate mutase [EC:5.4.2.12]+ko00010//Glycolysis / Gluconeogenesis+ko01230//Biosynthesis of…	Histidine phosphatase superfamily (branch 1)		PREDICTED: phosphoglycerate mutase-like protein 4 [Tarenaya hassleriana]	[G] KOG0235 Phosphoglycerate mutase	Phosphoglycerate mutase-like protein 4 OS=Arabidopsis thaliana GN=At3g50520 PE=2 SV=1
Unigene86934_All	1426	ko00071//Fatty acid degradation;ko00280//Valine, leucine and isoleucine degradation;ko01100//Metabolic pathways;ko00310//Lysine degradation;ko00620//Pyruvate metabolism;ko00410//beta-Alanine metabolism;ko00330//Arginine and proline metabolism;ko00260//Glycine, serine and threonine metabolism;ko00340//Histidine metabolism;ko00053//Ascorbate and aldarate metabolism;ko01110//Biosynthesis of secondar…	Metabolism	Carbohydrate metabolism;Metabolism of other amino acids;Global and overview maps;Lipid metabolism;Amino acid metabolism	-6.35633	1.14864e-10	4.44134e-11	K14085//aldehyde dehydrogenase family 7 member A1 [EC:1.2.1.31 1.2.1.8 1.2.1.3]+ko00410//beta-Alanine metabolism+ko00310//Lysine degradation+ko00010//Glycolysis / Gluconeogenesis+ko00380//Tryptophan metabolism+ko00330//Arginine and proline metabolism+ko00280//Valine, leucine and isoleucine degradation+ko01100//Metabolic pathways+ko00053//Ascorbate and aldarate metabolism+ko00340//Histidine metabo…	Aldehyde dehydrogenase family	AK107659.1 Oryza sativa Japonica Group cDNA clone:002-131-G08, full insert sequence	aldehyde dehydrogenase family 7 member A1 isoform X1 [Arachis ipaensis]	[C] KOG2453 Aldehyde dehydrogenase	Aldehyde dehydrogenase family 7 member A1 OS=Malus domestica PE=1 SV=3	GO:0016491//oxidoreductase activity
CL4408.Contig2_All	1842	ko01230//Biosynthesis of amino acids;ko01110//Biosynthesis of secondary metabolites;ko00010//Glycolysis / Gluconeogenesis;ko00620//Pyruvate metabolism;ko00230//Purine metabolism;ko01100//Metabolic pathways;ko01200//Carbon metabolism	Metabolism	Global and overview maps;Carbohydrate metabolism;Nucleotide metabolism	-6.46903	2.66526e-82	2.48994e-83	K00873//pyruvate kinase [EC:2.7.1.40]+ko00010//Glycolysis / Gluconeogenesis+ko00230//Purine metabolism+ko01230//Biosynthesis of amino acids+ko01100//Metabolic pathways+ko01110//Biosynthesis of secondary metabolites+ko00620//Pyruvate metabolism+ko01200//Carbon metabolism;K00873//pyruvate kinase [EC:2.7.1.40]+ko00010//Glycolysis / Gluconeogenesis+ko00230//Purine metabolism+ko01230//Biosynthesis of …	Pyruvate kinase, barrel domain		pyruvate kinase [Nannochloropsis gaditana]	[G] KOG2323 Pyruvate kinase	Pyruvate kinase, cytosolic isozyme OS=Glycine max PE=2 SV=1	GO:0030955//potassium ion binding;GO:0000287//magnesium ion binding;GO:0004743//pyruvate kinase activity;GO:0016301//kinase activity
Unigene46948_All	1263	ko01110//Biosynthesis of secondary metabolites;ko00010//Glycolysis / Gluconeogenesis;ko00620//Pyruvate metabolism;ko01200//Carbon metabolism;ko01100//Metabolic pathways;ko00020//Citrate cycle (TCA cycle)	Metabolism	Global and overview maps;Carbohydrate metabolism	-8.20933	6.9695e-61	8.17071e-62	K00161//pyruvate dehydrogenase E1 component alpha subunit [EC:1.2.4.1]+ko00010//Glycolysis / Gluconeogenesis+ko00020//Citrate cycle (TCA cycle)+ko01100//Metabolic pathways+ko01110//Biosynthesis of secondary metabolites+ko00620//Pyruvate metabolism+ko01200//Carbon metabolism;K00161//pyruvate dehydrogenase E1 component alpha subunit [EC:1.2.4.1]+ko00010//Glycolysis / Gluconeogenesis+ko00020//Citrat…	Dehydrogenase E1 component		pyruvate dehydrogenase E1 component alpha subunit [Zea mays]	[C] KOG0225 Pyruvate dehydrogenase E1, alpha subunit	Pyruvate dehydrogenase E1 component subunit alpha-2, mitochondrial OS=Oryza sativa subsp. japonica GN=Os06g0246500 PE=2 SV=1	GO:0043231//intracellular membrane-bounded organelle;GO:0004739//pyruvate dehydrogenase (acetyl-transferring) activity;GO:0006086//acetyl-CoA biosynthetic process from pyruvate
CL3869.Contig1_All	1748	ko00280//Valine, leucine and isoleucine degradation;ko00053//Ascorbate and aldarate metabolism;ko00340//Histidine metabolism;ko00410//beta-Alanine metabolism;ko00620//Pyruvate metabolism;ko00561//Glycerolipid metabolism;ko00903//Limonene and pinene degradation;ko00071//Fatty acid degradation;ko00380//Tryptophan metabolism;ko01100//Metabolic pathways;ko00330//Arginine and proline metabolism;ko0111…	Metabolism	Amino acid metabolism;Lipid metabolism;Carbohydrate metabolism;Global and overview maps;Metabolism of other amino acids;Metabolism of terpenoids and polyketides	-8.40073	1.32048e-34	2.31932e-35	K00128//aldehyde dehydrogenase (NAD+) [EC:1.2.1.3]+ko00410//beta-Alanine metabolism+ko00310//Lysine degradation+ko00010//Glycolysis / Gluconeogenesis+ko00903//Limonene and pinene degradation+ko00380//Tryptophan metabolism+ko00330//Arginine and proline metabolism+ko00280//Valine, leucine and isoleucine degradation+ko01100//Metabolic pathways+ko00053//Ascorbate and aldarate metabolism+ko00340//Hist…	Aldehyde dehydrogenase family		aldehyde dehydrogenase (NAD+) [Galdieria sulphuraria] >EME26154.1 aldehyde dehydrogenase (NAD+) [Galdieria sulphuraria]	[C] KOG2450 Aldehyde dehydrogenase	Aldehyde dehydrogenase family 2 member B7, mitochondrial OS=Arabidopsis thaliana GN=ALDH2B7 PE=1 SV=2	GO:0004029//aldehyde dehydrogenase (NAD) activity;GO:0016491//oxidoreductase activity
CL3869.Contig2_All	1662	ko00380//Tryptophan metabolism;ko00310//Lysine degradation;ko00410//beta-Alanine metabolism;ko00010//Glycolysis / Gluconeogenesis;ko00053//Ascorbate and aldarate metabolism;ko01110//Biosynthesis of secondary metabolites;ko00340//Histidine metabolism;ko00561//Glycerolipid metabolism;ko00903//Limonene and pinene degradation;ko00280//Valine, leucine and isoleucine degradation;ko01100//Metabolic path…	Metabolism	Global and overview maps;Lipid metabolism;Carbohydrate metabolism;Amino acid metabolism;Metabolism of terpenoids and polyketides;Metabolism of other amino acids	-8.52818	3.54254e-37	5.89728e-38	K00128//aldehyde dehydrogenase (NAD+) [EC:1.2.1.3]+ko00410//beta-Alanine metabolism+ko00310//Lysine degradation+ko00010//Glycolysis / Gluconeogenesis+ko00903//Limonene and pinene degradation+ko00380//Tryptophan metabolism+ko00330//Arginine and proline metabolism+ko00280//Valine, leucine and isoleucine degradation+ko01100//Metabolic pathways+ko00053//Ascorbate and aldarate metabolism+ko00340//Hist…	Aldehyde dehydrogenase family	XM_005778977.1 Emiliania huxleyi CCMP1516 putative mitochondrial aldehyde dehydrogenase (ALDH10), mRNA	aldehyde dehydrogenase (NAD+) [Galdieria sulphuraria] >EME26154.1 aldehyde dehydrogenase (NAD+) [Galdieria sulphuraria]	[C] KOG2450 Aldehyde dehydrogenase	Aldehyde dehydrogenase family 2 member B4, mitochondrial OS=Arabidopsis thaliana GN=ALDH2B4 PE=1 SV=1	GO:0004029//aldehyde dehydrogenase (NAD) activity;GO:0016491//oxidoreductase activity

## Sheet:  Citrate or TCA cycle
Supplementary Table 3:	Differentially expressed genes involved in citrate/TCA metabolism
Gene ID	Length	Pathway Name	Level 1	Level 2	log2(He_1000/He_400)	Qvalue(He_400-vs-He_1000)	Pvalue(He_400-vs-He_1000)	Kegg Orthology	Pfam	Nt	Nr	Kog	Swissprot	GO
Unigene6715_All	2343	ko00640//Propanoate metabolism;ko00260//Glycine, serine and threonine metabolism;ko00620//Pyruvate metabolism;ko01200//Carbon metabolism;ko00020//Citrate cycle (TCA cycle);ko00010//Glycolysis / Gluconeogenesis;ko01110//Biosynthesis of secondary metabolites;ko00630//Glyoxylate and dicarboxylate metabolism;ko01100//Metabolic pathways;ko00280//Valine, leucine and isoleucine degradation	Metabolism	Carbohydrate metabolism;Amino acid metabolism;Global and overview maps	1.86598	0	0	K00382//dihydrolipoamide dehydrogenase [EC:1.8.1.4]+ko00010//Glycolysis / Gluconeogenesis+ko00020//Citrate cycle (TCA cycle)+ko00280//Valine, leucine and isoleucine degradation+ko00640//Propanoate metabolism+ko01100//Metabolic pathways+ko01110//Biosynthesis of secondary metabolites+ko00260//Glycine, serine and threonine metabolism+ko00620//Pyruvate metabolism+ko01200//Carbon metabolism+ko00630//G…	Pyridine nucleotide-disulphide oxidoreductase		dihydrolipoamide dehydrogenase [Ectocarpus siliculosus]	[C] KOG1335 Dihydrolipoamide dehydrogenase	Dihydrolipoyl dehydrogenase 1, chloroplastic OS=Arabidopsis thaliana GN=LPD1 PE=2 SV=1	GO:0009055//electron transfer activity;GO:0004148//dihydrolipoyl dehydrogenase activity;GO:0005623//cell;GO:0050660//flavin adenine dinucleotide binding;GO:0045454//cell redox homeostasis
Unigene225_All	2017	ko00020//Citrate cycle (TCA cycle);ko01110//Biosynthesis of secondary metabolites;ko01100//Metabolic pathways;ko00010//Glycolysis / Gluconeogenesis;ko00710//Carbon fixation in photosynthetic organisms;ko00620//Pyruvate metabolism;ko01200//Carbon metabolism	Metabolism	Carbohydrate metabolism;Global and overview maps;Energy metabolism	1.63169	4.10303e-31	7.75705e-32	K01610//phosphoenolpyruvate carboxykinase (ATP) [EC:4.1.1.49]+ko00010//Glycolysis / Gluconeogenesis+ko00020//Citrate cycle (TCA cycle)+ko01100//Metabolic pathways+ko01110//Biosynthesis of secondary metabolites+ko00710//Carbon fixation in photosynthetic organisms+ko00620//Pyruvate metabolism+ko01200//Carbon metabolism;K01610//phosphoenolpyruvate carboxykinase (ATP) [EC:4.1.1.49]+ko00010//Glycolysi…	Phosphoenolpyruvate carboxykinase		phosphoenolpyruvate carboxykinase [Thalassiosira pseudonana]	[C] TWOG0797 Phosphoenolpyruvate carboxykinase (ATP)	Phosphoenolpyruvate carboxykinase (ATP) 2 OS=Urochloa panicoides GN=PCK2 PE=2 SV=1	GO:0005524//ATP binding;GO:0006094//gluconeogenesis;GO:0016301//kinase activity;GO:0005829//cytosol;GO:0004612//phosphoenolpyruvate carboxykinase (ATP) activity
Unigene11485_All	2223	ko00020//Citrate cycle (TCA cycle);ko00280//Valine, leucine and isoleucine degradation;ko01100//Metabolic pathways;ko00260//Glycine, serine and threonine metabolism;ko01110//Biosynthesis of secondary metabolites;ko01200//Carbon metabolism;ko00620//Pyruvate metabolism;ko00630//Glyoxylate and dicarboxylate metabolism;ko00010//Glycolysis / Gluconeogenesis;ko00640//Propanoate metabolism	Metabolism	Global and overview maps;Amino acid metabolism;Carbohydrate metabolism	1.484	1.61245e-06	8.53954e-07	K00382//dihydrolipoamide dehydrogenase [EC:1.8.1.4]+ko00010//Glycolysis / Gluconeogenesis+ko00020//Citrate cycle (TCA cycle)+ko00280//Valine, leucine and isoleucine degradation+ko00640//Propanoate metabolism+ko01100//Metabolic pathways+ko01110//Biosynthesis of secondary metabolites+ko00260//Glycine, serine and threonine metabolism+ko00620//Pyruvate metabolism+ko01200//Carbon metabolism+ko00630//G…	Herpesvirus UL6 like		dihydrolipoamide dehydrogenase [Ectocarpus siliculosus]	[C] KOG1335 Dihydrolipoamide dehydrogenase	Dihydrolipoyl dehydrogenase 1, chloroplastic OS=Arabidopsis thaliana GN=LPD1 PE=2 SV=1	GO:0009055//electron transfer activity;GO:0005623//cell;GO:0050660//flavin adenine dinucleotide binding;GO:0016668//oxidoreductase activity, acting on a sulfur group of donors, NAD(P) as acceptor;GO:0045454//cell redox homeostasis
Unigene27334_All	483	ko00020//Citrate cycle (TCA cycle);ko01100//Metabolic pathways;ko00630//Glyoxylate and dicarboxylate metabolism;ko00270//Cysteine and methionine metabolism;ko00620//Pyruvate metabolism;ko01110//Biosynthesis of secondary metabolites;ko01200//Carbon metabolism;ko00710//Carbon fixation in photosynthetic organisms	Metabolism	Carbohydrate metabolism;Global and overview maps;Energy metabolism;Amino acid metabolism	1.37499	2.10862e-06	1.13271e-06	K00025//malate dehydrogenase [EC:1.1.1.37]+ko00020//Citrate cycle (TCA cycle)+ko01100//Metabolic pathways+ko01110//Biosynthesis of secondary metabolites+ko00710//Carbon fixation in photosynthetic organisms+ko00620//Pyruvate metabolism+ko00270//Cysteine and methionine metabolism+ko01200//Carbon metabolism+ko00630//Glyoxylate and dicarboxylate metabolism;K00025//malate dehydrogenase [EC:1.1.1.37]+k…	lactate/malate dehydrogenase, NAD binding domain		malate dehydrogenase [Scytosiphon lomentaria]	[C] KOG1496 Malate dehydrogenase	Malate dehydrogenase, cytoplasmic OS=Mesembryanthemum crystallinum GN=MDH PE=2 SV=1	GO:0016616//oxidoreductase activity, acting on the CH-OH group of donors, NAD or NADP as acceptor;GO:0005737//cytoplasm;GO:0006734//NADH metabolic process;GO:0006108//malate metabolic process;GO:0006099//tricarboxylic acid cycle;GO:0006107//oxaloacetate metabolic process;GO:0016615//malate dehydrogenase activity;GO:0016021//integral component of membrane;GO:0005975//carbohydrate metabolic process…
Unigene41559_All	2918	ko00620//Pyruvate metabolism;ko01110//Biosynthesis of secondary metabolites;ko00020//Citrate cycle (TCA cycle);ko01100//Metabolic pathways;ko00010//Glycolysis / Gluconeogenesis;ko01200//Carbon metabolism	Metabolism	Carbohydrate metabolism;Global and overview maps	1.16898	0	0	K00161//pyruvate dehydrogenase E1 component alpha subunit [EC:1.2.4.1]+ko00010//Glycolysis / Gluconeogenesis+ko00020//Citrate cycle (TCA cycle)+ko01100//Metabolic pathways+ko01110//Biosynthesis of secondary metabolites+ko00620//Pyruvate metabolism+ko01200//Carbon metabolism;K00161//pyruvate dehydrogenase E1 component alpha subunit [EC:1.2.4.1]+ko00010//Glycolysis / Gluconeogenesis+ko00020//Citrat…	Dehydrogenase E1 component		hypothetical protein GUITHDRAFT_164161 [Guillardia theta CCMP2712] >EKX42366.1 hypothetical protein GUITHDRAFT_164161 [Guillardia theta CCMP2712]	[C] KOG0225 Pyruvate dehydrogenase E1, alpha subunit	Pyruvate dehydrogenase E1 component subunit beta OS=Pyropia yezoensis GN=pdhB PE=3 SV=1	GO:0016624//oxidoreductase activity, acting on the aldehyde or oxo group of donors, disulfide as acceptor
Unigene48554_All	2542	ko01110//Biosynthesis of secondary metabolites;ko01100//Metabolic pathways;ko00620//Pyruvate metabolism;ko00020//Citrate cycle (TCA cycle);ko00010//Glycolysis / Gluconeogenesis;ko01200//Carbon metabolism	Metabolism	Carbohydrate metabolism;Global and overview maps	1.00465	0	0	K00161//pyruvate dehydrogenase E1 component alpha subunit [EC:1.2.4.1]+ko00010//Glycolysis / Gluconeogenesis+ko00020//Citrate cycle (TCA cycle)+ko01100//Metabolic pathways+ko01110//Biosynthesis of secondary metabolites+ko00620//Pyruvate metabolism+ko01200//Carbon metabolism;K00161//pyruvate dehydrogenase E1 component alpha subunit [EC:1.2.4.1]+ko00010//Glycolysis / Gluconeogenesis+ko00020//Citrat…	Dehydrogenase E1 component	XM_009037186.1 Aureococcus anophagefferens hypothetical protein mRNA	pyruvate dehydrogenase e1 component alpha subunit [Nannochloropsis gaditana]	[C] KOG0225 Pyruvate dehydrogenase E1, alpha subunit	Pyruvate dehydrogenase E1 component subunit alpha-2, mitochondrial OS=Arabidopsis thaliana GN=IAR4 PE=1 SV=2	GO:0043231//intracellular membrane-bounded organelle;GO:0004739//pyruvate dehydrogenase (acetyl-transferring) activity;GO:0006086//acetyl-CoA biosynthetic process from pyruvate
Unigene18571_All	1530	ko01200//Carbon metabolism;ko01110//Biosynthesis of secondary metabolites;ko00010//Glycolysis / Gluconeogenesis;ko00620//Pyruvate metabolism;ko01100//Metabolic pathways;ko00020//Citrate cycle (TCA cycle)	Metabolism	Global and overview maps;Carbohydrate metabolism	-1.00224	6.96124e-183	3.59258e-184	K00162//pyruvate dehydrogenase E1 component beta subunit [EC:1.2.4.1]+ko00010//Glycolysis / Gluconeogenesis+ko00020//Citrate cycle (TCA cycle)+ko01100//Metabolic pathways+ko01110//Biosynthesis of secondary metabolites+ko00620//Pyruvate metabolism+ko01200//Carbon metabolism;K00162//pyruvate dehydrogenase E1 component beta subunit [EC:1.2.4.1]+ko00010//Glycolysis / Gluconeogenesis+ko00020//Citrate …		XM_005846322.1 Chlorella variabilis hypothetical protein (CHLNCDRAFT_59713) mRNA, complete cds	Pyruvate dehydrogenase E1 component subunit beta [Phytophthora megakarya]	[C] KOG0524 Pyruvate dehydrogenase E1, beta subunit	Pyruvate dehydrogenase E1 component subunit beta-1, mitochondrial OS=Oryza sativa subsp. japonica GN=Os08g0536000 PE=2 SV=1	GO:0005759//mitochondrial matrix;GO:0006096//glycolytic process;GO:0004739//pyruvate dehydrogenase (acetyl-transferring) activity;GO:0006086//acetyl-CoA biosynthetic process from pyruvate
Unigene5032_All	3354	ko00260//Glycine, serine and threonine metabolism;ko00010//Glycolysis / Gluconeogenesis;ko00630//Glyoxylate and dicarboxylate metabolism;ko00620//Pyruvate metabolism;ko01200//Carbon metabolism;ko00280//Valine, leucine and isoleucine degradation;ko01110//Biosynthesis of secondary metabolites;ko01100//Metabolic pathways;ko00640//Propanoate metabolism;ko00020//Citrate cycle (TCA cycle)	Metabolism	Global and overview maps;Amino acid metabolism;Carbohydrate metabolism	-1.04263	3.83716e-87	3.44738e-88	K00382//dihydrolipoamide dehydrogenase [EC:1.8.1.4]+ko00010//Glycolysis / Gluconeogenesis+ko00020//Citrate cycle (TCA cycle)+ko00280//Valine, leucine and isoleucine degradation+ko00640//Propanoate metabolism+ko01100//Metabolic pathways+ko01110//Biosynthesis of secondary metabolites+ko00260//Glycine, serine and threonine metabolism+ko00620//Pyruvate metabolism+ko01200//Carbon metabolism+ko00630//G…	Pyridine nucleotide-disulphide oxidoreductase		dihydrolipoamide dehydrogenase [Ectocarpus siliculosus]	[C] KOG1335 Dihydrolipoamide dehydrogenase	Dihydrolipoyl dehydrogenase 1, chloroplastic OS=Arabidopsis thaliana GN=LPD1 PE=2 SV=1	GO:0009055//electron transfer activity;GO:0004148//dihydrolipoyl dehydrogenase activity;GO:0005623//cell;GO:0050660//flavin adenine dinucleotide binding;GO:0045454//cell redox homeostasis
Unigene38912_All	646	ko00020//Citrate cycle (TCA cycle);ko03040//Spliceosome;ko01110//Biosynthesis of secondary metabolites;ko00620//Pyruvate metabolism;ko01100//Metabolic pathways;ko00010//Glycolysis / Gluconeogenesis;ko01200//Carbon metabolism	Metabolism;Genetic Information Processing	Transcription;Global and overview maps;Carbohydrate metabolism	-1.0933	0.000166037	0.00011208	K12896//splicing factor, arginine/serine-rich 7+ko03040//Spliceosome;K02184//formin 2;K02184//formin 2;K02184//formin 2;K00627//pyruvate dehydrogenase E2 component (dihydrolipoamide acetyltransferase) [EC:2.3.1.12]+ko00010//Glycolysis / Gluconeogenesis+ko00020//Citrate cycle (TCA cycle)+ko01100//Metabolic pathways+ko01110//Biosynthesis of secondary metabolites+ko00620//Pyruvate metabolism+ko01200…			hypothetical protein BU14_0131s0028, partial [Porphyra umbilicalis]	[T] KOG4270 GTPase-activator protein	Proline-rich receptor-like protein kinase PERK8 OS=Arabidopsis thaliana GN=PERK8 PE=1 SV=1	GO:0004674//protein serine/threonine kinase activity;GO:0005524//ATP binding;GO:0005509//calcium ion binding;GO:0016021//integral component of membrane
Unigene25848_All	2221	ko00620//Pyruvate metabolism;ko00010//Glycolysis / Gluconeogenesis;ko01110//Biosynthesis of secondary metabolites;ko01100//Metabolic pathways;ko00630//Glyoxylate and dicarboxylate metabolism;ko00280//Valine, leucine and isoleucine degradation;ko01200//Carbon metabolism;ko00260//Glycine, serine and threonine metabolism;ko00640//Propanoate metabolism;ko00020//Citrate cycle (TCA cycle)	Metabolism	Amino acid metabolism;Carbohydrate metabolism;Global and overview maps	-1.09481	4.01468e-77	3.93712e-78	K00382//dihydrolipoamide dehydrogenase [EC:1.8.1.4]+ko00010//Glycolysis / Gluconeogenesis+ko00020//Citrate cycle (TCA cycle)+ko00280//Valine, leucine and isoleucine degradation+ko00640//Propanoate metabolism+ko01100//Metabolic pathways+ko01110//Biosynthesis of secondary metabolites+ko00260//Glycine, serine and threonine metabolism+ko00620//Pyruvate metabolism+ko01200//Carbon metabolism+ko00630//G…	Pyridine nucleotide-disulphide oxidoreductase		predicted protein [Phaeodactylum tricornutum CCAP 1055/1] >EEC48570.1 predicted protein [Phaeodactylum tricornutum CCAP 1055/1]	[C] KOG1335 Dihydrolipoamide dehydrogenase	Leghemoglobin reductase OS=Glycine max GN=FLBR PE=1 SV=1	GO:0050661//NADP binding;GO:0006749//glutathione metabolic process;GO:0005623//cell;GO:0050660//flavin adenine dinucleotide binding;GO:0016021//integral component of membrane;GO:0004362//glutathione-disulfide reductase activity;GO:0045454//cell redox homeostasis
Unigene8649_All	3002	ko00190//Oxidative phosphorylation;ko01200//Carbon metabolism;ko01100//Metabolic pathways;ko00020//Citrate cycle (TCA cycle);ko01110//Biosynthesis of secondary metabolites	Metabolism	Energy metabolism;Carbohydrate metabolism;Global and overview maps	-1.11001	1.0832e-64	1.21086e-65	K00234//succinate dehydrogenase (ubiquinone) flavoprotein subunit [EC:1.3.5.1]+ko00020//Citrate cycle (TCA cycle)+ko01100//Metabolic pathways+ko00190//Oxidative phosphorylation+ko01110//Biosynthesis of secondary metabolites+ko01200//Carbon metabolism;K00234//succinate dehydrogenase (ubiquinone) flavoprotein subunit [EC:1.3.5.1]+ko00020//Citrate cycle (TCA cycle)+ko01100//Metabolic pathways+ko0019…	FAD binding domain	XM_009040194.1 Aureococcus anophagefferens hypothetical protein mRNA	succinate dehydrogenase (ubiquinone) flavoprotein subunit [Fistulifera solaris]	[C] KOG2403 Succinate dehydrogenase, flavoprotein subunit	Succinate dehydrogenase [ubiquinone] flavoprotein subunit 1, mitochondrial OS=Arabidopsis thaliana GN=SDH1-1 PE=1 SV=1	GO:0009055//electron transfer activity;GO:0006121//mitochondrial electron transport, succinate to ubiquinone;GO:0050660//flavin adenine dinucleotide binding;GO:0006099//tricarboxylic acid cycle;GO:0005749//mitochondrial respiratory chain complex II, succinate dehydrogenase complex (ubiquinone);GO:0000104//succinate dehydrogenase activity;GO:0022900//electron transport chain;GO:0005743//mitochondr…
Unigene15030_All	991	ko00010//Glycolysis / Gluconeogenesis;ko01110//Biosynthesis of secondary metabolites;ko00620//Pyruvate metabolism;ko00020//Citrate cycle (TCA cycle);ko01200//Carbon metabolism;ko01100//Metabolic pathways	Metabolism	Global and overview maps;Carbohydrate metabolism	-1.11591	6.62171e-09	2.87199e-09	K00627//pyruvate dehydrogenase E2 component (dihydrolipoamide acetyltransferase) [EC:2.3.1.12]+ko00010//Glycolysis / Gluconeogenesis+ko00020//Citrate cycle (TCA cycle)+ko01100//Metabolic pathways+ko01110//Biosynthesis of secondary metabolites+ko00620//Pyruvate metabolism+ko01200//Carbon metabolism	Prefoldin subunit		PREDICTED: formin-like protein 14 [Vigna angularis]
Unigene10339_All	2382	ko01200//Carbon metabolism;ko00640//Propanoate metabolism;ko00020//Citrate cycle (TCA cycle);ko00010//Glycolysis / Gluconeogenesis;ko01110//Biosynthesis of secondary metabolites;ko00630//Glyoxylate and dicarboxylate metabolism;ko00260//Glycine, serine and threonine metabolism;ko01100//Metabolic pathways;ko00280//Valine, leucine and isoleucine degradation;ko00620//Pyruvate metabolism	Metabolism	Carbohydrate metabolism;Amino acid metabolism;Global and overview maps	-1.13854	1.52029e-60	1.79119e-61	K00382//dihydrolipoamide dehydrogenase [EC:1.8.1.4]+ko00010//Glycolysis / Gluconeogenesis+ko00020//Citrate cycle (TCA cycle)+ko00280//Valine, leucine and isoleucine degradation+ko00640//Propanoate metabolism+ko01100//Metabolic pathways+ko01110//Biosynthesis of secondary metabolites+ko00260//Glycine, serine and threonine metabolism+ko00620//Pyruvate metabolism+ko01200//Carbon metabolism+ko00630//G…	Pyridine nucleotide-disulphide oxidoreductase	XM_009038694.1 Aureococcus anophagefferens mercuric reductase (MER1), partial mRNA	mercuric reductase [Ectocarpus siliculosus]	[C] KOG1335 Dihydrolipoamide dehydrogenase	Leghemoglobin reductase OS=Vigna unguiculata GN=FLBR PE=1 SV=1	GO:0009055//electron transfer activity;GO:0005623//cell;GO:0050660//flavin adenine dinucleotide binding;GO:0016021//integral component of membrane;GO:0016668//oxidoreductase activity, acting on a sulfur group of donors, NAD(P) as acceptor;GO:0045454//cell redox homeostasis;GO:0016491//oxidoreductase activity
Unigene44619_All	2907	ko01200//Carbon metabolism;ko00020//Citrate cycle (TCA cycle);ko01210//2-Oxocarboxylic acid metabolism;ko01230//Biosynthesis of amino acids;ko01110//Biosynthesis of secondary metabolites;ko01100//Metabolic pathways;ko00630//Glyoxylate and dicarboxylate metabolism	Metabolism	Carbohydrate metabolism;Global and overview maps	-1.15073	1.50976e-14	4.75088e-15	K01681//aconitate hydratase [EC:4.2.1.3]+ko00020//Citrate cycle (TCA cycle)+ko01230//Biosynthesis of amino acids+ko01100//Metabolic pathways+ko01110//Biosynthesis of secondary metabolites+ko01210//2-Oxocarboxylic acid metabolism+ko01200//Carbon metabolism+ko00630//Glyoxylate and dicarboxylate metabolism;K01681//aconitate hydratase [EC:4.2.1.3]+ko00020//Citrate cycle (TCA cycle)+ko01230//Biosynthe…	Monomeric isocitrate dehydrogenase		isocitrate dehydrogenase/citrate hydrolyase [Dorcoceras hygrometricum]			GO:0006099//tricarboxylic acid cycle;GO:0004450//isocitrate dehydrogenase (NADP+) activity
CL7309.Contig1_All	632	ko00630//Glyoxylate and dicarboxylate metabolism;ko01110//Biosynthesis of secondary metabolites;ko01210//2-Oxocarboxylic acid metabolism;ko01100//Metabolic pathways;ko01200//Carbon metabolism;ko01230//Biosynthesis of amino acids;ko00020//Citrate cycle (TCA cycle)	Metabolism	Global and overview maps;Carbohydrate metabolism	-1.1527	6.08874e-13	2.06503e-13	K01681//aconitate hydratase [EC:4.2.1.3]+ko00020//Citrate cycle (TCA cycle)+ko01230//Biosynthesis of amino acids+ko01100//Metabolic pathways+ko01110//Biosynthesis of secondary metabolites+ko01210//2-Oxocarboxylic acid metabolism+ko01200//Carbon metabolism+ko00630//Glyoxylate and dicarboxylate metabolism;K01681//aconitate hydratase [EC:4.2.1.3]+ko00020//Citrate cycle (TCA cycle)+ko01230//Biosynthe…	Monomeric isocitrate dehydrogenase		isocitrate dehydrogenase/citrate hydrolyase [Dorcoceras hygrometricum]			GO:0006099//tricarboxylic acid cycle;GO:0004450//isocitrate dehydrogenase (NADP+) activity
CL10502.Contig2_All	1732	ko01200//Carbon metabolism;ko00010//Glycolysis / Gluconeogenesis;ko01100//Metabolic pathways;ko01110//Biosynthesis of secondary metabolites;ko00020//Citrate cycle (TCA cycle);ko00620//Pyruvate metabolism	Metabolism	Global and overview maps;Carbohydrate metabolism	-1.22293	7.62321e-236	3.21514e-237	K00161//pyruvate dehydrogenase E1 component alpha subunit [EC:1.2.4.1]+ko00010//Glycolysis / Gluconeogenesis+ko00020//Citrate cycle (TCA cycle)+ko01100//Metabolic pathways+ko01110//Biosynthesis of secondary metabolites+ko00620//Pyruvate metabolism+ko01200//Carbon metabolism;K00161//pyruvate dehydrogenase E1 component alpha subunit [EC:1.2.4.1]+ko00010//Glycolysis / Gluconeogenesis+ko00020//Citrat…	Dehydrogenase E1 component	XM_009037186.1 Aureococcus anophagefferens hypothetical protein mRNA	pyruvate dehydrogenase e1 component alpha subunit [Nannochloropsis gaditana]	[C] KOG0225 Pyruvate dehydrogenase E1, alpha subunit	Pyruvate dehydrogenase E1 component subunit alpha-2, mitochondrial OS=Arabidopsis thaliana GN=IAR4 PE=1 SV=2	GO:0043231//intracellular membrane-bounded organelle;GO:0004739//pyruvate dehydrogenase (acetyl-transferring) activity;GO:0006086//acetyl-CoA biosynthetic process from pyruvate
Unigene196_All	2326	ko01210//2-Oxocarboxylic acid metabolism;ko01100//Metabolic pathways;ko01200//Carbon metabolism;ko00630//Glyoxylate and dicarboxylate metabolism;ko00020//Citrate cycle (TCA cycle);ko01110//Biosynthesis of secondary metabolites;ko01230//Biosynthesis of amino acids	Metabolism	Global and overview maps;Carbohydrate metabolism	-1.28966	1.07823e-13	3.52981e-14	K01681//aconitate hydratase [EC:4.2.1.3]+ko00020//Citrate cycle (TCA cycle)+ko01230//Biosynthesis of amino acids+ko01100//Metabolic pathways+ko01110//Biosynthesis of secondary metabolites+ko01210//2-Oxocarboxylic acid metabolism+ko01200//Carbon metabolism+ko00630//Glyoxylate and dicarboxylate metabolism;K01681//aconitate hydratase [EC:4.2.1.3]+ko00020//Citrate cycle (TCA cycle)+ko01230//Biosynthe…	Aconitase family (aconitate hydratase)		aconitate hydratase, mitochondrial precursor [Achlya hypogyna]	[CE] KOG0453 Aconitase/homoaconitase (aconitase superfamily)	Aconitate hydratase, mitochondrial OS=Gracilaria gracilis PE=3 SV=1	GO:0006099//tricarboxylic acid cycle;GO:0003994//aconitate hydratase activity;GO:0046872//metal ion binding;GO:0051539//4 iron, 4 sulfur cluster binding;GO:0005739//mitochondrion
CL7125.Contig2_All	1857	ko00020//Citrate cycle (TCA cycle);ko00640//Propanoate metabolism;ko01110//Biosynthesis of secondary metabolites;ko01100//Metabolic pathways;ko01200//Carbon metabolism	Metabolism	Global and overview maps;Carbohydrate metabolism	-1.30136	2.68311e-137	1.74951e-138	K01900//succinyl-CoA synthetase beta subunit [EC:6.2.1.4 6.2.1.5]+ko00020//Citrate cycle (TCA cycle)+ko00640//Propanoate metabolism+ko01100//Metabolic pathways+ko01110//Biosynthesis of secondary metabolites+ko01200//Carbon metabolism;K01900//succinyl-CoA synthetase beta subunit [EC:6.2.1.4 6.2.1.5]+ko00020//Citrate cycle (TCA cycle)+ko00640//Propanoate metabolism+ko01100//Metabolic pathways+ko011…	ATP-grasp domain		succinyl-CoA synthetase beta subunit [Fistulifera solaris]	[C] KOG2799 Succinyl-CoA synthetase, beta subunit	Succinate--CoA ligase [ADP-forming] subunit beta, mitochondrial OS=Solanum lycopersicum PE=1 SV=1	GO:0006099//tricarboxylic acid cycle;GO:0004775//succinate-CoA ligase (ADP-forming) activity;GO:0000287//magnesium ion binding;GO:0005524//ATP binding;GO:0005739//mitochondrion
Unigene25818_All	1513	ko00640//Propanoate metabolism;ko00280//Valine, leucine and isoleucine degradation;ko00260//Glycine, serine and threonine metabolism;ko01110//Biosynthesis of secondary metabolites;ko00010//Glycolysis / Gluconeogenesis;ko00620//Pyruvate metabolism;ko01200//Carbon metabolism;ko00020//Citrate cycle (TCA cycle);ko01100//Metabolic pathways;ko00630//Glyoxylate and dicarboxylate metabolism	Metabolism	Global and overview maps;Carbohydrate metabolism;Amino acid metabolism	-1.31125	1.64996e-08	7.36698e-09	K00382//dihydrolipoamide dehydrogenase [EC:1.8.1.4]+ko00010//Glycolysis / Gluconeogenesis+ko00020//Citrate cycle (TCA cycle)+ko00280//Valine, leucine and isoleucine degradation+ko00640//Propanoate metabolism+ko01100//Metabolic pathways+ko01110//Biosynthesis of secondary metabolites+ko00260//Glycine, serine and threonine metabolism+ko00620//Pyruvate metabolism+ko01200//Carbon metabolism+ko00630//G…	Pyridine nucleotide-disulphide oxidoreductase		PREDICTED: dihydrolipoyl dehydrogenase, mitochondrial [Erythranthe guttata] >EYU33082.1 hypothetical protein MIMGU_mgv1a004880mg [Erythranthe guttata]	[C] KOG1335 Dihydrolipoamide dehydrogenase	Dihydrolipoyl dehydrogenase 2, mitochondrial OS=Arabidopsis thaliana GN=LPD2 PE=1 SV=1	GO:0009055//electron transfer activity;GO:0004148//dihydrolipoyl dehydrogenase activity;GO:0005623//cell;GO:0050660//flavin adenine dinucleotide binding;GO:0045454//cell redox homeostasis
Unigene29702_All	1150	ko01200//Carbon metabolism;ko00020//Citrate cycle (TCA cycle);ko01100//Metabolic pathways;ko01110//Biosynthesis of secondary metabolites;ko00640//Propanoate metabolism	Metabolism	Global and overview maps;Carbohydrate metabolism	-1.34373	4.51444e-08	2.0858e-08	K01900//succinyl-CoA synthetase beta subunit [EC:6.2.1.4 6.2.1.5]+ko00020//Citrate cycle (TCA cycle)+ko00640//Propanoate metabolism+ko01100//Metabolic pathways+ko01110//Biosynthesis of secondary metabolites+ko01200//Carbon metabolism;K01900//succinyl-CoA synthetase beta subunit [EC:6.2.1.4 6.2.1.5]+ko00020//Citrate cycle (TCA cycle)+ko00640//Propanoate metabolism+ko01100//Metabolic pathways+ko011…	ATP-grasp domain		hypothetical protein SPRG_09585 [Saprolegnia parasitica CBS 223.65] >KDO24941.1 hypothetical protein SPRG_09585 [Saprolegnia parasitica CBS 223.65]	[C] KOG1447 GTP-specific succinyl-CoA synthetase, beta subunit	Succinate--CoA ligase [ADP-forming] subunit beta OS=Blastocystis sp. subtype 1 (strain ATCC 50177 / NandII) GN=SCSb PE=1 SV=1	GO:0006099//tricarboxylic acid cycle;GO:0004775//succinate-CoA ligase (ADP-forming) activity;GO:0000287//magnesium ion binding;GO:0005524//ATP binding;GO:0005739//mitochondrion
Unigene33393_All	1247	ko00620//Pyruvate metabolism;ko01110//Biosynthesis of secondary metabolites;ko01200//Carbon metabolism;ko01100//Metabolic pathways;ko00020//Citrate cycle (TCA cycle)	Metabolism	Global and overview maps;Carbohydrate metabolism	-1.37001	8.73655e-08	4.13136e-08	K01679//fumarate hydratase, class II [EC:4.2.1.2]+ko00020//Citrate cycle (TCA cycle)+ko01100//Metabolic pathways+ko01110//Biosynthesis of secondary metabolites+ko00620//Pyruvate metabolism+ko01200//Carbon metabolism;K01679//fumarate hydratase, class II [EC:4.2.1.2]+ko00020//Citrate cycle (TCA cycle)+ko01100//Metabolic pathways+ko01110//Biosynthesis of secondary metabolites+ko00620//Pyruvate metab…	Lyase		fumarate hydratase class II [Aphanomyces invadans] >ETV92442.1 fumarate hydratase class II [Aphanomyces invadans]	[C] KOG1317 Fumarase	Fumarate hydratase 1, mitochondrial OS=Arabidopsis thaliana GN=FUM1 PE=1 SV=2	GO:0006099//tricarboxylic acid cycle;GO:0045239//tricarboxylic acid cycle enzyme complex;GO:0006106//fumarate metabolic process;GO:0004333//fumarate hydratase activity
Unigene496_All	998	ko00020//Citrate cycle (TCA cycle);ko00010//Glycolysis / Gluconeogenesis;ko01100//Metabolic pathways;ko00620//Pyruvate metabolism;ko01110//Biosynthesis of secondary metabolites;ko01200//Carbon metabolism	Metabolism	Global and overview maps;Carbohydrate metabolism	-1.38305	3.04736e-35	5.27459e-36	K10799//tankyrase [EC:2.4.2.30];K00627//pyruvate dehydrogenase E2 component (dihydrolipoamide acetyltransferase) [EC:2.3.1.12]+ko00010//Glycolysis / Gluconeogenesis+ko00020//Citrate cycle (TCA cycle)+ko01100//Metabolic pathways+ko01110//Biosynthesis of secondary metabolites+ko00620//Pyruvate metabolism+ko01200//Carbon metabolism;K00627//pyruvate dehydrogenase E2 component (dihydrolipoamide acetyl…	Tetratricopeptide repeat		hypothetical protein BU14_0066s0031 [Porphyra umbilicalis]	[TZ] KOG3671 Actin regulatory protein (Wiskott-Aldrich syndrome protein)	Formin-like protein 3 OS=Oryza sativa subsp. japonica GN=FH3 PE=2 SV=2
CL7257.Contig3_All	2802	ko01200//Carbon metabolism;ko00710//Carbon fixation in photosynthetic organisms;ko00020//Citrate cycle (TCA cycle);ko01100//Metabolic pathways;ko00620//Pyruvate metabolism;ko00010//Glycolysis / Gluconeogenesis;ko01110//Biosynthesis of secondary metabolites	Metabolism	Energy metabolism;Carbohydrate metabolism;Global and overview maps	-1.40821	0.000424406	0.000306487	K01610//phosphoenolpyruvate carboxykinase (ATP) [EC:4.1.1.49]+ko00010//Glycolysis / Gluconeogenesis+ko00020//Citrate cycle (TCA cycle)+ko01100//Metabolic pathways+ko01110//Biosynthesis of secondary metabolites+ko00710//Carbon fixation in photosynthetic organisms+ko00620//Pyruvate metabolism+ko01200//Carbon metabolism;K01610//phosphoenolpyruvate carboxykinase (ATP) [EC:4.1.1.49]+ko00010//Glycolysi…	Phosphoenolpyruvate carboxykinase		phosphoenolpyruvate carboxykinase [Nannochloropsis gaditana]	[C] TWOG0797 Phosphoenolpyruvate carboxykinase (ATP)	Phosphoenolpyruvate carboxykinase (ATP) OS=Arabidopsis thaliana GN=PCKA PE=1 SV=1	GO:0005524//ATP binding;GO:0006094//gluconeogenesis;GO:0016301//kinase activity;GO:0005829//cytosol;GO:0004612//phosphoenolpyruvate carboxykinase (ATP) activity
CL4289.Contig1_All	904	ko00190//Oxidative phosphorylation;ko01100//Metabolic pathways;ko01110//Biosynthesis of secondary metabolites;ko01200//Carbon metabolism;ko00020//Citrate cycle (TCA cycle)	Metabolism	Carbohydrate metabolism;Global and overview maps;Energy metabolism	-1.41462	8.50402e-120	6.07521e-121	K00236//succinate dehydrogenase (ubiquinone) cytochrome b560 subunit+ko00020//Citrate cycle (TCA cycle)+ko01100//Metabolic pathways+ko00190//Oxidative phosphorylation+ko01110//Biosynthesis of secondary metabolites+ko01200//Carbon metabolism;K00236//succinate dehydrogenase (ubiquinone) cytochrome b560 subunit+ko00020//Citrate cycle (TCA cycle)+ko01100//Metabolic pathways+ko00190//Oxidative phospho…	Succinate dehydrogenase/Fumarate reductase transmembrane subunit		succinate dehydrogenase, cytochrome b556 subunit [Aphanomyces invadans] >ETV96110.1 succinate dehydrogenase, cytochrome b556 subunit [Aphanomyces invadans]	[G] KOG0449 Succinate dehydrogenase, cytochrome b subunit	Succinate dehydrogenase cytochrome b560 subunit OS=Porphyra purpurea GN=SDH3 PE=3 SV=1	GO:0006099//tricarboxylic acid cycle;GO:0000104//succinate dehydrogenase activity;GO:0046872//metal ion binding;GO:0045281//succinate dehydrogenase complex;GO:0016021//integral component of membrane
CL4289.Contig2_All	888	ko01100//Metabolic pathways;ko01110//Biosynthesis of secondary metabolites;ko00190//Oxidative phosphorylation;ko01200//Carbon metabolism;ko00020//Citrate cycle (TCA cycle)	Metabolism	Energy metabolism;Carbohydrate metabolism;Global and overview maps	-1.44215	9.52485e-113	7.10524e-114	K00236//succinate dehydrogenase (ubiquinone) cytochrome b560 subunit+ko00020//Citrate cycle (TCA cycle)+ko01100//Metabolic pathways+ko00190//Oxidative phosphorylation+ko01110//Biosynthesis of secondary metabolites+ko01200//Carbon metabolism;K00236//succinate dehydrogenase (ubiquinone) cytochrome b560 subunit+ko00020//Citrate cycle (TCA cycle)+ko01100//Metabolic pathways+ko00190//Oxidative phospho…	Succinate dehydrogenase/Fumarate reductase transmembrane subunit		succinate dehydrogenase, cytochrome b556 subunit [Aphanomyces invadans] >ETV96110.1 succinate dehydrogenase, cytochrome b556 subunit [Aphanomyces invadans]	[G] KOG0449 Succinate dehydrogenase, cytochrome b subunit	Succinate dehydrogenase cytochrome b560 subunit OS=Porphyra purpurea GN=SDH3 PE=3 SV=1	GO:0006099//tricarboxylic acid cycle;GO:0000104//succinate dehydrogenase activity;GO:0046872//metal ion binding;GO:0045281//succinate dehydrogenase complex;GO:0016021//integral component of membrane
Unigene253_All	3391	ko01200//Carbon metabolism;ko01110//Biosynthesis of secondary metabolites;ko01100//Metabolic pathways;ko00310//Lysine degradation;ko00380//Tryptophan metabolism;ko00020//Citrate cycle (TCA cycle)	Metabolism	Amino acid metabolism;Carbohydrate metabolism;Global and overview maps	-1.47604	1.65694e-188	8.32124e-190	K00164//2-oxoglutarate dehydrogenase E1 component [EC:1.2.4.2]+ko00310//Lysine degradation+ko00020//Citrate cycle (TCA cycle)+ko00380//Tryptophan metabolism+ko01100//Metabolic pathways+ko01110//Biosynthesis of secondary metabolites+ko01200//Carbon metabolism;K00164//2-oxoglutarate dehydrogenase E1 component [EC:1.2.4.2]+ko00310//Lysine degradation+ko00020//Citrate cycle (TCA cycle)+ko00380//Trypt…	Transketolase, pyrimidine binding domain		2-oxoglutarate dehydrogenase e1 component [Nannochloropsis gaditana]	[G] KOG0450 2-oxoglutarate dehydrogenase, E1 subunit	Formin-like protein 5 OS=Oryza sativa subsp. japonica GN=FH5 PE=2 SV=2	GO:0006099//tricarboxylic acid cycle;GO:0004591//oxoglutarate dehydrogenase (succinyl-transferring) activity;GO:0030976//thiamine pyrophosphate binding
Unigene17910_All	6077	ko01110//Biosynthesis of secondary metabolites;ko00640//Propanoate metabolism;ko01200//Carbon metabolism;ko01100//Metabolic pathways;ko00020//Citrate cycle (TCA cycle)	Metabolism	Carbohydrate metabolism;Global and overview maps	-1.52242	1.66278e-65	1.84535e-66	K01899//succinyl-CoA synthetase alpha subunit [EC:6.2.1.4 6.2.1.5]+ko00020//Citrate cycle (TCA cycle)+ko00640//Propanoate metabolism+ko01100//Metabolic pathways+ko01110//Biosynthesis of secondary metabolites+ko01200//Carbon metabolism;K01899//succinyl-CoA synthetase alpha subunit [EC:6.2.1.4 6.2.1.5]+ko00020//Citrate cycle (TCA cycle)+ko00640//Propanoate metabolism+ko01100//Metabolic pathways+ko0…	UDP-3-O-acyl N-acetylglycosamine deacetylase		Succinyl-CoA ligase [Phytophthora megakarya]	[C] KOG1255 Succinyl-CoA synthetase, alpha subunit	Succinate--CoA ligase [ADP-forming] subunit alpha, mitochondrial OS=Oryza sativa subsp. japonica GN=Os07g0577700 PE=1 SV=1	GO:0006099//tricarboxylic acid cycle;GO:0004775//succinate-CoA ligase (ADP-forming) activity;GO:0005759//mitochondrial matrix;GO:0000166//nucleotide binding;GO:0048037//cofactor binding;GO:0005739//mitochondrion;GO:0004776//succinate-CoA ligase (GDP-forming) activity
CL3071.Contig1_All	1233	ko01100//Metabolic pathways;ko00310//Lysine degradation;ko01110//Biosynthesis of secondary metabolites;ko01200//Carbon metabolism;ko00020//Citrate cycle (TCA cycle)	Metabolism	Amino acid metabolism;Carbohydrate metabolism;Global and overview maps	-1.52304	1.20951e-33	2.16794e-34	K00658//2-oxoglutarate dehydrogenase E2 component (dihydrolipoamide succinyltransferase) [EC:2.3.1.61]+ko00310//Lysine degradation+ko00020//Citrate cycle (TCA cycle)+ko01100//Metabolic pathways+ko01110//Biosynthesis of secondary metabolites+ko01200//Carbon metabolism;K00658//2-oxoglutarate dehydrogenase E2 component (dihydrolipoamide succinyltransferase) [EC:2.3.1.61]+ko00310//Lysine degradation+…	2-oxoacid dehydrogenases acyltransferase (catalytic domain)	XM_002897937.1 Phytophthora infestans T30-4 dihydrolipoamide succinyltransferase, putative (PITG_15705) mRNA, complete cds	dihydrolipoamide succinyltransferase [Nannochloropsis gaditana]	[C] KOG0559 Dihydrolipoamide succinyltransferase (2-oxoglutarate dehydrogenase, E2 subunit)	Dihydrolipoyllysine-residue succinyltransferase component of 2-oxoglutarate dehydrogenase complex 1, mitochondrial OS=Arabidopsis thaliana GN=At5g55070 PE=1 SV=1	GO:0006099//tricarboxylic acid cycle;GO:0004742//dihydrolipoyllysine-residue acetyltransferase activity;GO:0045252//oxoglutarate dehydrogenase complex;GO:0005524//ATP binding;GO:0004340//glucokinase activity;GO:0006096//glycolytic process;GO:0004149//dihydrolipoyllysine-residue succinyltransferase activity
CL7309.Contig2_All	2433	ko01100//Metabolic pathways;ko01230//Biosynthesis of amino acids;ko01210//2-Oxocarboxylic acid metabolism;ko00630//Glyoxylate and dicarboxylate metabolism;ko01110//Biosynthesis of secondary metabolites;ko03020//RNA polymerase;ko00020//Citrate cycle (TCA cycle);ko01200//Carbon metabolism	Genetic Information Processing;Metabolism	Carbohydrate metabolism;Transcription;Global and overview maps	-1.62686	0	0	K01681//aconitate hydratase [EC:4.2.1.3]+ko00020//Citrate cycle (TCA cycle)+ko01230//Biosynthesis of amino acids+ko01100//Metabolic pathways+ko01110//Biosynthesis of secondary metabolites+ko01210//2-Oxocarboxylic acid metabolism+ko01200//Carbon metabolism+ko00630//Glyoxylate and dicarboxylate metabolism;K01681//aconitate hydratase [EC:4.2.1.3]+ko00020//Citrate cycle (TCA cycle)+ko01230//Biosynthe…	Monomeric isocitrate dehydrogenase	XM_009040915.1 Aureococcus anophagefferens hypothetical protein partial mRNA	isocitrate dehydrogenase, NADP-dependent [Fragilariopsis cylindrus CCMP1102]	[WV] KOG1216 von Willebrand factor and related coagulation proteins	Formin-like protein 16 OS=Oryza sativa subsp. japonica GN=FH16 PE=2 SV=1	GO:0006099//tricarboxylic acid cycle;GO:0004450//isocitrate dehydrogenase (NADP+) activity
Unigene9644_All	4454	ko00190//Oxidative phosphorylation;ko01110//Biosynthesis of secondary metabolites;ko01200//Carbon metabolism;ko01100//Metabolic pathways;ko00020//Citrate cycle (TCA cycle)	Metabolism	Energy metabolism;Carbohydrate metabolism;Global and overview maps	-1.63049	9.97915e-153	5.99103e-154	K00234//succinate dehydrogenase (ubiquinone) flavoprotein subunit [EC:1.3.5.1]+ko00020//Citrate cycle (TCA cycle)+ko01100//Metabolic pathways+ko00190//Oxidative phosphorylation+ko01110//Biosynthesis of secondary metabolites+ko01200//Carbon metabolism;K00234//succinate dehydrogenase (ubiquinone) flavoprotein subunit [EC:1.3.5.1]+ko00020//Citrate cycle (TCA cycle)+ko01100//Metabolic pathways+ko0019…	FAD binding domain	XM_009040194.1 Aureococcus anophagefferens hypothetical protein mRNA	succinate dehydrogenase (ubiquinone) flavoprotein subunit [Fistulifera solaris]	[C] KOG2403 Succinate dehydrogenase, flavoprotein subunit	Succinate dehydrogenase [ubiquinone] flavoprotein subunit 1, mitochondrial OS=Arabidopsis thaliana GN=SDH1-1 PE=1 SV=1	GO:0009055//electron transfer activity;GO:0006121//mitochondrial electron transport, succinate to ubiquinone;GO:0050660//flavin adenine dinucleotide binding;GO:0006099//tricarboxylic acid cycle;GO:0005749//mitochondrial respiratory chain complex II, succinate dehydrogenase complex (ubiquinone);GO:0000104//succinate dehydrogenase activity;GO:0022900//electron transport chain;GO:0005743//mitochondr…
Unigene25538_All	4243	ko01110//Biosynthesis of secondary metabolites;ko00310//Lysine degradation;ko00020//Citrate cycle (TCA cycle);ko01200//Carbon metabolism;ko00380//Tryptophan metabolism;ko01100//Metabolic pathways	Metabolism	Amino acid metabolism;Carbohydrate metabolism;Global and overview maps	-1.64911	7.7383e-45	1.12229e-45	K00164//2-oxoglutarate dehydrogenase E1 component [EC:1.2.4.2]+ko00310//Lysine degradation+ko00020//Citrate cycle (TCA cycle)+ko00380//Tryptophan metabolism+ko01100//Metabolic pathways+ko01110//Biosynthesis of secondary metabolites+ko01200//Carbon metabolism;K00164//2-oxoglutarate dehydrogenase E1 component [EC:1.2.4.2]+ko00310//Lysine degradation+ko00020//Citrate cycle (TCA cycle)+ko00380//Trypt…	2-oxoacid dehydrogenases acyltransferase (catalytic domain)		2-oxoglutarate dehydrogenase, mitochondrial [Auxenochlorella protothecoides] >KFM27866.1 2-oxoglutarate dehydrogenase, mitochondrial [Auxenochlorella protothecoides]	[G] KOG0450 2-oxoglutarate dehydrogenase, E1 subunit	Dihydrolipoyllysine-residue succinyltransferase component of 2-oxoglutarate dehydrogenase complex 1, mitochondrial OS=Arabidopsis thaliana GN=At5g55070 PE=1 SV=1	GO:0006099//tricarboxylic acid cycle;GO:0045252//oxoglutarate dehydrogenase complex;GO:0004591//oxoglutarate dehydrogenase (succinyl-transferring) activity;GO:0005739//mitochondrion;GO:0030976//thiamine pyrophosphate binding
Unigene22078_All	1572	ko01100//Metabolic pathways;ko00310//Lysine degradation;ko01110//Biosynthesis of secondary metabolites;ko00620//Pyruvate metabolism;ko00010//Glycolysis / Gluconeogenesis;ko00020//Citrate cycle (TCA cycle);ko01200//Carbon metabolism	Metabolism	Global and overview maps;Carbohydrate metabolism;Amino acid metabolism	-1.67708	1.35708e-26	2.85141e-27	K00627//pyruvate dehydrogenase E2 component (dihydrolipoamide acetyltransferase) [EC:2.3.1.12]+ko00010//Glycolysis / Gluconeogenesis+ko00020//Citrate cycle (TCA cycle)+ko01100//Metabolic pathways+ko01110//Biosynthesis of secondary metabolites+ko00620//Pyruvate metabolism+ko01200//Carbon metabolism;K00627//pyruvate dehydrogenase E2 component (dihydrolipoamide acetyltransferase) [EC:2.3.1.12]+ko000…	2-oxoacid dehydrogenases acyltransferase (catalytic domain)		hypothetical protein L917_15989 [Phytophthora parasitica]	[C] KOG0558 Dihydrolipoamide transacylase (alpha-keto acid dehydrogenase E2 subunit)	Dihydrolipoyllysine-residue acetyltransferase component 2 of pyruvate dehydrogenase complex, mitochondrial OS=Arabidopsis thaliana GN=At3g13930 PE=1 SV=2
CL11085.Contig1_All	5286	ko01100//Metabolic pathways;ko00020//Citrate cycle (TCA cycle);ko01110//Biosynthesis of secondary metabolites	Metabolism	Global and overview maps;Carbohydrate metabolism	-1.7244	1.00203e-67	1.08384e-68	K01648//ATP citrate (pro-S)-lyase [EC:2.3.3.8]+ko00020//Citrate cycle (TCA cycle)+ko01100//Metabolic pathways+ko01110//Biosynthesis of secondary metabolites;K01648//ATP citrate (pro-S)-lyase [EC:2.3.3.8]+ko00020//Citrate cycle (TCA cycle)+ko01100//Metabolic pathways+ko01110//Biosynthesis of secondary metabolites;K01648//ATP citrate (pro-S)-lyase [EC:2.3.3.8]+ko00020//Citrate cycle (TCA cycle)+ko0…	Citrate synthase, C-terminal domain	XM_008608685.1 Saprolegnia diclina VS20 ATP-citrate synthase mRNA	atp-citrate synthase [Phaeodactylum tricornutum CCAP 1055/1] >EEC48223.1 atp-citrate synthase [Phaeodactylum tricornutum CCAP 1055/1]	[C] KOG1254 ATP-citrate lyase	ATP-citrate synthase beta chain protein 2 OS=Arabidopsis thaliana GN=ACLB-2 PE=1 SV=1	GO:0006101//citrate metabolic process;GO:0006085//acetyl-CoA biosynthetic process;GO:0003878//ATP citrate synthase activity;GO:0046872//metal ion binding;GO:0005524//ATP binding;GO:0048037//cofactor binding;GO:0005737//cytoplasm;GO:0006629//lipid metabolic process
CL5667.Contig1_All	5014	ko00020//Citrate cycle (TCA cycle);ko01110//Biosynthesis of secondary metabolites;ko01100//Metabolic pathways;ko01200//Carbon metabolism;ko00190//Oxidative phosphorylation	Metabolism	Global and overview maps;Carbohydrate metabolism;Energy metabolism	-1.74315	3.49452e-83	3.24639e-84	K00234//succinate dehydrogenase (ubiquinone) flavoprotein subunit [EC:1.3.5.1]+ko00020//Citrate cycle (TCA cycle)+ko01100//Metabolic pathways+ko00190//Oxidative phosphorylation+ko01110//Biosynthesis of secondary metabolites+ko01200//Carbon metabolism;K00234//succinate dehydrogenase (ubiquinone) flavoprotein subunit [EC:1.3.5.1]+ko00020//Citrate cycle (TCA cycle)+ko01100//Metabolic pathways+ko0019…	FAD binding domain		hypothetical protein OsI_32585 [Oryza sativa Indica Group]	[C] KOG2403 Succinate dehydrogenase, flavoprotein subunit	Succinate dehydrogenase [ubiquinone] iron-sulfur subunit 2, mitochondrial OS=Oryza sativa subsp. japonica GN=SDH2-2 PE=1 SV=1	GO:0009055//electron transfer activity;GO:0006121//mitochondrial electron transport, succinate to ubiquinone;GO:0050660//flavin adenine dinucleotide binding;GO:0006099//tricarboxylic acid cycle;GO:0022900//electron transport chain;GO:0005749//mitochondrial respiratory chain complex II, succinate dehydrogenase complex (ubiquinone);GO:0000104//succinate dehydrogenase activity;GO:0005743//mitochondr…
CL2608.Contig2_All	2898	ko01100//Metabolic pathways;ko01110//Biosynthesis of secondary metabolites;ko00280//Valine, leucine and isoleucine degradation;ko00260//Glycine, serine and threonine metabolism;ko00640//Propanoate metabolism;ko00010//Glycolysis / Gluconeogenesis;ko01200//Carbon metabolism;ko00630//Glyoxylate and dicarboxylate metabolism;ko00020//Citrate cycle (TCA cycle);ko00620//Pyruvate metabolism	Metabolism	Amino acid metabolism;Carbohydrate metabolism;Global and overview maps	-1.77532	3.89437e-23	8.94317e-24	K00382//dihydrolipoamide dehydrogenase [EC:1.8.1.4]+ko00010//Glycolysis / Gluconeogenesis+ko00020//Citrate cycle (TCA cycle)+ko00280//Valine, leucine and isoleucine degradation+ko00640//Propanoate metabolism+ko01100//Metabolic pathways+ko01110//Biosynthesis of secondary metabolites+ko00260//Glycine, serine and threonine metabolism+ko00620//Pyruvate metabolism+ko01200//Carbon metabolism+ko00630//G…	Protein of unknown function (DUF1572)		hypothetical protein TSUD_199460 [Trifolium subterraneum]	[C] KOG1335 Dihydrolipoamide dehydrogenase	Dihydrolipoyl dehydrogenase, mitochondrial OS=Pisum sativum GN=LPD PE=1 SV=2	GO:0009055//electron transfer activity;GO:0005759//mitochondrial matrix;GO:0004148//dihydrolipoyl dehydrogenase activity;GO:0048046//apoplast;GO:0005524//ATP binding;GO:0050660//flavin adenine dinucleotide binding;GO:0045454//cell redox homeostasis;GO:0050897//cobalt ion binding;GO:0046686//response to cadmium ion;GO:0005747//mitochondrial respiratory chain complex I;GO:0005623//cell;GO:0005507//…
CL636.Contig2_All	1107	ko00620//Pyruvate metabolism;ko00910//Nitrogen metabolism;ko00010//Glycolysis / Gluconeogenesis;ko00020//Citrate cycle (TCA cycle);ko01100//Metabolic pathways;ko01200//Carbon metabolism;ko01110//Biosynthesis of secondary metabolites	Metabolism	Carbohydrate metabolism;Energy metabolism;Global and overview maps	-1.84486	0.0002321	0.000160769	K00627//pyruvate dehydrogenase E2 component (dihydrolipoamide acetyltransferase) [EC:2.3.1.12]+ko00010//Glycolysis / Gluconeogenesis+ko00020//Citrate cycle (TCA cycle)+ko01100//Metabolic pathways+ko01110//Biosynthesis of secondary metabolites+ko00620//Pyruvate metabolism+ko01200//Carbon metabolism;K00627//pyruvate dehydrogenase E2 component (dihydrolipoamide acetyltransferase) [EC:2.3.1.12]+ko000…	Biotin-requiring enzyme		Cap-specific mRNA (nucleoside-2'-O-)-methyltransferase 1 [Symbiodinium microadriaticum]	[T] KOG4743 Cyclin-dependent kinase inhibitor	Myrosinase-binding protein 2 OS=Arabidopsis thaliana GN=MBP2 PE=2 SV=1	GO:0005524//ATP binding;GO:0004672//protein kinase activity
Unigene18189_All	2407	ko01100//Metabolic pathways;ko00020//Citrate cycle (TCA cycle);ko01110//Biosynthesis of secondary metabolites;ko00620//Pyruvate metabolism;ko01200//Carbon metabolism	Metabolism	Carbohydrate metabolism;Global and overview maps	-1.86808	2.00851e-78	1.94749e-79	K01676//fumarate hydratase, class I [EC:4.2.1.2]+ko00020//Citrate cycle (TCA cycle)+ko01100//Metabolic pathways+ko01110//Biosynthesis of secondary metabolites+ko00620//Pyruvate metabolism+ko01200//Carbon metabolism;K01676//fumarate hydratase, class I [EC:4.2.1.2]+ko00020//Citrate cycle (TCA cycle)+ko01100//Metabolic pathways+ko01110//Biosynthesis of secondary metabolites+ko00620//Pyruvate metabol…	Fumarase C-terminus	XM_001696582.1 Chlamydomonas reinhardtii fumarate hydratase (FUM1), mRNA	fumarate hydratase [Nannochloropsis gaditana]	[AR] KOG2146 Splicing coactivator SRm160/300, subunit SRm160 (contains PWI domain)	Lysine-rich arabinogalactan protein 19 OS=Arabidopsis thaliana GN=AGP19 PE=2 SV=2	GO:0006091//generation of precursor metabolites and energy;GO:0004333//fumarate hydratase activity
CL7257.Contig10_All	2552	ko01200//Carbon metabolism;ko00010//Glycolysis / Gluconeogenesis;ko00710//Carbon fixation in photosynthetic organisms;ko00020//Citrate cycle (TCA cycle);ko01110//Biosynthesis of secondary metabolites;ko01100//Metabolic pathways;ko00620//Pyruvate metabolism	Metabolism	Energy metabolism;Carbohydrate metabolism;Global and overview maps	-1.91368	0	0	K01610//phosphoenolpyruvate carboxykinase (ATP) [EC:4.1.1.49]+ko00010//Glycolysis / Gluconeogenesis+ko00020//Citrate cycle (TCA cycle)+ko01100//Metabolic pathways+ko01110//Biosynthesis of secondary metabolites+ko00710//Carbon fixation in photosynthetic organisms+ko00620//Pyruvate metabolism+ko01200//Carbon metabolism;K01610//phosphoenolpyruvate carboxykinase (ATP) [EC:4.1.1.49]+ko00010//Glycolysi…	Phosphoenolpyruvate carboxykinase		phosphoenolpyruvate carboxykinase [Nannochloropsis gaditana]	[C] TWOG0797 Phosphoenolpyruvate carboxykinase (ATP)	Phosphoenolpyruvate carboxykinase (ATP) OS=Arabidopsis thaliana GN=PCKA PE=1 SV=1	GO:0005524//ATP binding;GO:0006094//gluconeogenesis;GO:0016301//kinase activity;GO:0005829//cytosol;GO:0004612//phosphoenolpyruvate carboxykinase (ATP) activity
CL4597.Contig2_All	1507	ko01200//Carbon metabolism;ko00620//Pyruvate metabolism;ko00630//Glyoxylate and dicarboxylate metabolism;ko00710//Carbon fixation in photosynthetic organisms;ko01110//Biosynthesis of secondary metabolites;ko01100//Metabolic pathways;ko00020//Citrate cycle (TCA cycle);ko00270//Cysteine and methionine metabolism	Metabolism	Amino acid metabolism;Carbohydrate metabolism;Energy metabolism;Global and overview maps	-1.93003	1.48138e-18	3.95814e-19	K00026//malate dehydrogenase [EC:1.1.1.37]+ko00020//Citrate cycle (TCA cycle)+ko01100//Metabolic pathways+ko01110//Biosynthesis of secondary metabolites+ko00710//Carbon fixation in photosynthetic organisms+ko00620//Pyruvate metabolism+ko00270//Cysteine and methionine metabolism+ko01200//Carbon metabolism+ko00630//Glyoxylate and dicarboxylate metabolism;K00026//malate dehydrogenase [EC:1.1.1.37]+k…	lactate/malate dehydrogenase, alpha/beta C-terminal domain		malate dehydrogenase [Sargassum thunbergii]	[C] KOG1494 NAD-dependent malate dehydrogenase	Malate dehydrogenase, glyoxysomal OS=Oryza sativa subsp. japonica GN=Os12g0632700 PE=1 SV=3
Unigene16369_All	1385	ko01200//Carbon metabolism;ko01100//Metabolic pathways;ko01110//Biosynthesis of secondary metabolites;ko00020//Citrate cycle (TCA cycle);ko00310//Lysine degradation	Metabolism	Amino acid metabolism;Global and overview maps;Carbohydrate metabolism	-1.9413	7.88099e-06	4.4995e-06	K00658//2-oxoglutarate dehydrogenase E2 component (dihydrolipoamide succinyltransferase) [EC:2.3.1.61]+ko00310//Lysine degradation+ko00020//Citrate cycle (TCA cycle)+ko01100//Metabolic pathways+ko01110//Biosynthesis of secondary metabolites+ko01200//Carbon metabolism;K00658//2-oxoglutarate dehydrogenase E2 component (dihydrolipoamide succinyltransferase) [EC:2.3.1.61]+ko00310//Lysine degradation+…	2-oxoacid dehydrogenases acyltransferase (catalytic domain)		2-oxoglutarate dehydrogenase E2 component (dihydrolipoamide succinyltransferase), partial [Chondrus crispus] >CDF36795.1 2-oxoglutarate dehydrogenase E2 component (dihydrolipoamide succinyltransferase), partial [Chondrus crispus]	[C] KOG0559 Dihydrolipoamide succinyltransferase (2-oxoglutarate dehydrogenase, E2 subunit)	Dihydrolipoyllysine-residue succinyltransferase component of 2-oxoglutarate dehydrogenase complex 2, mitochondrial OS=Arabidopsis thaliana GN=At4g26910 PE=1 SV=2	GO:0006099//tricarboxylic acid cycle;GO:0045252//oxoglutarate dehydrogenase complex;GO:0004149//dihydrolipoyllysine-residue succinyltransferase activity
CL7996.Contig1_All	620	ko01100//Metabolic pathways;ko01110//Biosynthesis of secondary metabolites;ko00020//Citrate cycle (TCA cycle);ko00190//Oxidative phosphorylation;ko01200//Carbon metabolism	Metabolism	Global and overview maps;Carbohydrate metabolism;Energy metabolism	-1.98778	1.46195e-93	1.24817e-94	K00237//succinate dehydrogenase (ubiquinone) membrane anchor subunit+ko00020//Citrate cycle (TCA cycle)+ko01100//Metabolic pathways+ko00190//Oxidative phosphorylation+ko01110//Biosynthesis of secondary metabolites+ko01200//Carbon metabolism;K00237//succinate dehydrogenase (ubiquinone) membrane anchor subunit+ko00020//Citrate cycle (TCA cycle)+ko01100//Metabolic pathways+ko00190//Oxidative phospho…	CybS, succinate dehydrogenase cytochrome B small subunit		succinate dehydrogenase subunit 4 [Nannochloropsis gaditana]			GO:0005743//mitochondrial inner membrane;GO:0016021//integral component of membrane
Unigene3951_All	2576	ko01100//Metabolic pathways;ko01110//Biosynthesis of secondary metabolites;ko00010//Glycolysis / Gluconeogenesis;ko00020//Citrate cycle (TCA cycle);ko00620//Pyruvate metabolism;ko01200//Carbon metabolism	Metabolism	Carbohydrate metabolism;Global and overview maps	-1.98779	3.82292e-59	4.58099e-60	K00161//pyruvate dehydrogenase E1 component alpha subunit [EC:1.2.4.1]+ko00010//Glycolysis / Gluconeogenesis+ko00020//Citrate cycle (TCA cycle)+ko01100//Metabolic pathways+ko01110//Biosynthesis of secondary metabolites+ko00620//Pyruvate metabolism+ko01200//Carbon metabolism;K00161//pyruvate dehydrogenase E1 component alpha subunit [EC:1.2.4.1]+ko00010//Glycolysis / Gluconeogenesis+ko00020//Citrat…	Dehydrogenase E1 component	XM_009037186.1 Aureococcus anophagefferens hypothetical protein mRNA	pyruvate dehydrogenase e1 component alpha subunit [Nannochloropsis gaditana]	[C] KOG0225 Pyruvate dehydrogenase E1, alpha subunit	Pyruvate dehydrogenase E1 component subunit alpha-2, mitochondrial OS=Arabidopsis thaliana GN=IAR4 PE=1 SV=2	GO:0043231//intracellular membrane-bounded organelle;GO:0004739//pyruvate dehydrogenase (acetyl-transferring) activity;GO:0006086//acetyl-CoA biosynthetic process from pyruvate
Unigene4539_All	3242	ko00010//Glycolysis / Gluconeogenesis;ko00020//Citrate cycle (TCA cycle);ko00620//Pyruvate metabolism;ko01200//Carbon metabolism;ko01100//Metabolic pathways;ko01110//Biosynthesis of secondary metabolites	Metabolism	Carbohydrate metabolism;Global and overview maps	-2.0248	0	0	K00161//pyruvate dehydrogenase E1 component alpha subunit [EC:1.2.4.1]+ko00010//Glycolysis / Gluconeogenesis+ko00020//Citrate cycle (TCA cycle)+ko01100//Metabolic pathways+ko01110//Biosynthesis of secondary metabolites+ko00620//Pyruvate metabolism+ko01200//Carbon metabolism;K00161//pyruvate dehydrogenase E1 component alpha subunit [EC:1.2.4.1]+ko00010//Glycolysis / Gluconeogenesis+ko00020//Citrat…	Dehydrogenase E1 component	XM_009037186.1 Aureococcus anophagefferens hypothetical protein mRNA	pyruvate dehydrogenase e1 component alpha subunit [Nannochloropsis gaditana]	[C] KOG0225 Pyruvate dehydrogenase E1, alpha subunit	Pyruvate dehydrogenase E1 component subunit alpha-2, mitochondrial OS=Arabidopsis thaliana GN=IAR4 PE=1 SV=2	GO:0043231//intracellular membrane-bounded organelle;GO:0004739//pyruvate dehydrogenase (acetyl-transferring) activity;GO:0006086//acetyl-CoA biosynthetic process from pyruvate
Unigene40805_All	2455	ko01100//Metabolic pathways;ko01110//Biosynthesis of secondary metabolites;ko00020//Citrate cycle (TCA cycle);ko00620//Pyruvate metabolism;ko00010//Glycolysis / Gluconeogenesis;ko01200//Carbon metabolism	Metabolism	Carbohydrate metabolism;Global and overview maps	-2.12375	7.96505e-45	1.15534e-45	K00162//pyruvate dehydrogenase E1 component beta subunit [EC:1.2.4.1]+ko00010//Glycolysis / Gluconeogenesis+ko00020//Citrate cycle (TCA cycle)+ko01100//Metabolic pathways+ko01110//Biosynthesis of secondary metabolites+ko00620//Pyruvate metabolism+ko01200//Carbon metabolism;K00162//pyruvate dehydrogenase E1 component beta subunit [EC:1.2.4.1]+ko00010//Glycolysis / Gluconeogenesis+ko00020//Citrate …	Dehydrogenase E1 component		PREDICTED: pyruvate dehydrogenase E1 component subunit beta-like [Nelumbo nucifera]	[C] KOG0525 Branched chain alpha-keto acid dehydrogenase E1, beta subunit	Pyruvate dehydrogenase E1 component subunit beta-3, chloroplastic OS=Oryza sativa subsp. japonica GN=Os12g0616900 PE=2 SV=1	GO:0008152//metabolic process;GO:0003824//catalytic activity
Unigene36954_All	8503	ko00620//Pyruvate metabolism;ko00010//Glycolysis / Gluconeogenesis;ko00020//Citrate cycle (TCA cycle);ko01200//Carbon metabolism;ko01100//Metabolic pathways;ko01110//Biosynthesis of secondary metabolites	Metabolism	Carbohydrate metabolism;Global and overview maps	-2.18687	4.29095e-205	2.01082e-206	K00627//pyruvate dehydrogenase E2 component (dihydrolipoamide acetyltransferase) [EC:2.3.1.12]+ko00010//Glycolysis / Gluconeogenesis+ko00020//Citrate cycle (TCA cycle)+ko01100//Metabolic pathways+ko01110//Biosynthesis of secondary metabolites+ko00620//Pyruvate metabolism+ko01200//Carbon metabolism;K00627//pyruvate dehydrogenase E2 component (dihydrolipoamide acetyltransferase) [EC:2.3.1.12]+ko000…	Dehydrogenase E1 component		uncharacterized protein A4U43_C08F340 [Asparagus officinalis]	[C] KOG0557 Dihydrolipoamide acetyltransferase	Pyruvate dehydrogenase E1 component subunit alpha-3, chloroplastic OS=Oryza sativa subsp. japonica GN=Os04g0119400 PE=2 SV=2	GO:0005759//mitochondrial matrix;GO:0004742//dihydrolipoyllysine-residue acetyltransferase activity;GO:0006090//pyruvate metabolic process;GO:0045254//pyruvate dehydrogenase complex
Unigene27812_All	1537	ko01110//Biosynthesis of secondary metabolites;ko00010//Glycolysis / Gluconeogenesis;ko00260//Glycine, serine and threonine metabolism;ko00630//Glyoxylate and dicarboxylate metabolism;ko00020//Citrate cycle (TCA cycle);ko00620//Pyruvate metabolism;ko01200//Carbon metabolism;ko01100//Metabolic pathways;ko00280//Valine, leucine and isoleucine degradation;ko00640//Propanoate metabolism	Metabolism	Carbohydrate metabolism;Amino acid metabolism;Global and overview maps	-2.20433	1.24831e-21	2.99796e-22	K00382//dihydrolipoamide dehydrogenase [EC:1.8.1.4]+ko00010//Glycolysis / Gluconeogenesis+ko00020//Citrate cycle (TCA cycle)+ko00280//Valine, leucine and isoleucine degradation+ko00640//Propanoate metabolism+ko01100//Metabolic pathways+ko01110//Biosynthesis of secondary metabolites+ko00260//Glycine, serine and threonine metabolism+ko00620//Pyruvate metabolism+ko01200//Carbon metabolism+ko00630//G…	Pyridine nucleotide-disulphide oxidoreductase		hypothetical protein AXG93_2015s1160 [Marchantia polymorpha subsp. ruderalis]	[C] KOG1335 Dihydrolipoamide dehydrogenase	Dihydrolipoyl dehydrogenase, mitochondrial OS=Pisum sativum GN=LPD PE=1 SV=2	GO:0009055//electron transfer activity;GO:0004148//dihydrolipoyl dehydrogenase activity;GO:0005623//cell;GO:0050660//flavin adenine dinucleotide binding;GO:0045454//cell redox homeostasis
CL8963.Contig1_All	1228	ko01100//Metabolic pathways;ko01200//Carbon metabolism;ko01110//Biosynthesis of secondary metabolites;ko01230//Biosynthesis of amino acids;ko01210//2-Oxocarboxylic acid metabolism;ko00020//Citrate cycle (TCA cycle);ko00630//Glyoxylate and dicarboxylate metabolism	Metabolism	Global and overview maps;Carbohydrate metabolism	-2.31966	1.42119e-10	5.52347e-11	K01647//citrate synthase [EC:2.3.3.1]+ko00020//Citrate cycle (TCA cycle)+ko01230//Biosynthesis of amino acids+ko01100//Metabolic pathways+ko01110//Biosynthesis of secondary metabolites+ko01210//2-Oxocarboxylic acid metabolism+ko01200//Carbon metabolism+ko00630//Glyoxylate and dicarboxylate metabolism;K01647//citrate synthase [EC:2.3.3.1]+ko00020//Citrate cycle (TCA cycle)+ko01230//Biosynthesis of…	Citrate synthase, C-terminal domain		citrate synthase [Chrysochromulina sp. CCMP291]	[C] KOG2617 Citrate synthase	Citrate synthase 5, mitochondrial OS=Arabidopsis thaliana GN=CSY5 PE=1 SV=2	GO:0006099//tricarboxylic acid cycle;GO:0046912//transferase activity, transferring acyl groups, acyl groups converted into alkyl on transfer;GO:0004108//citrate (Si)-synthase activity
Unigene13659_All	2798	ko00630//Glyoxylate and dicarboxylate metabolism;ko00010//Glycolysis / Gluconeogenesis;ko00260//Glycine, serine and threonine metabolism;ko01200//Carbon metabolism;ko00020//Citrate cycle (TCA cycle);ko01100//Metabolic pathways;ko01110//Biosynthesis of secondary metabolites;ko00280//Valine, leucine and isoleucine degradation;ko00640//Propanoate metabolism;ko00620//Pyruvate metabolism	Metabolism	Amino acid metabolism;Global and overview maps;Carbohydrate metabolism	-2.38437	1.36765e-179	7.16549e-181	K00382//dihydrolipoamide dehydrogenase [EC:1.8.1.4]+ko00010//Glycolysis / Gluconeogenesis+ko00020//Citrate cycle (TCA cycle)+ko00280//Valine, leucine and isoleucine degradation+ko00640//Propanoate metabolism+ko01100//Metabolic pathways+ko01110//Biosynthesis of secondary metabolites+ko00260//Glycine, serine and threonine metabolism+ko00620//Pyruvate metabolism+ko01200//Carbon metabolism+ko00630//G…	Pyridine nucleotide-disulphide oxidoreductase	AB182315.1 Heterosigma akashiwo DNA, fragment RA7577N5500.1	mercuric reductase [Ectocarpus siliculosus]	[C] KOG1335 Dihydrolipoamide dehydrogenase	Leghemoglobin reductase OS=Vigna unguiculata GN=FLBR PE=1 SV=1	GO:0009055//electron transfer activity;GO:0005623//cell;GO:0050660//flavin adenine dinucleotide binding;GO:0016021//integral component of membrane;GO:0016668//oxidoreductase activity, acting on a sulfur group of donors, NAD(P) as acceptor;GO:0045454//cell redox homeostasis;GO:0016491//oxidoreductase activity
Unigene62429_All	885	ko01230//Biosynthesis of amino acids;ko01110//Biosynthesis of secondary metabolites;ko00020//Citrate cycle (TCA cycle);ko01100//Metabolic pathways;ko01210//2-Oxocarboxylic acid metabolism;ko01200//Carbon metabolism;ko00630//Glyoxylate and dicarboxylate metabolism	Metabolism	Global and overview maps;Carbohydrate metabolism	-2.53691	4.68472e-06	2.60992e-06	K01681//aconitate hydratase [EC:4.2.1.3]+ko00020//Citrate cycle (TCA cycle)+ko01230//Biosynthesis of amino acids+ko01100//Metabolic pathways+ko01110//Biosynthesis of secondary metabolites+ko01210//2-Oxocarboxylic acid metabolism+ko01200//Carbon metabolism+ko00630//Glyoxylate and dicarboxylate metabolism;K01681//aconitate hydratase [EC:4.2.1.3]+ko00020//Citrate cycle (TCA cycle)+ko01230//Biosynthe…	Monomeric isocitrate dehydrogenase		isocitrate dehydrogenase/citrate hydrolyase [Dorcoceras hygrometricum]			GO:0006099//tricarboxylic acid cycle;GO:0004450//isocitrate dehydrogenase (NADP+) activity
CL3256.Contig1_All	2523	ko01110//Biosynthesis of secondary metabolites;ko00640//Propanoate metabolism;ko01100//Metabolic pathways;ko00020//Citrate cycle (TCA cycle);ko01200//Carbon metabolism	Metabolism	Carbohydrate metabolism;Global and overview maps	-2.54076	7.24034e-19	1.91112e-19	K01900//succinyl-CoA synthetase beta subunit [EC:6.2.1.4 6.2.1.5]+ko00020//Citrate cycle (TCA cycle)+ko00640//Propanoate metabolism+ko01100//Metabolic pathways+ko01110//Biosynthesis of secondary metabolites+ko01200//Carbon metabolism;K01900//succinyl-CoA synthetase beta subunit [EC:6.2.1.4 6.2.1.5]+ko00020//Citrate cycle (TCA cycle)+ko00640//Propanoate metabolism+ko01100//Metabolic pathways+ko011…	ATP-grasp domain		hypothetical protein F511_24282 [Dorcoceras hygrometricum]	[C] KOG2799 Succinyl-CoA synthetase, beta subunit	Succinate--CoA ligase [ADP-forming] subunit beta, mitochondrial OS=Arabidopsis thaliana GN=At2g20420 PE=1 SV=1	GO:0006099//tricarboxylic acid cycle;GO:0004775//succinate-CoA ligase (ADP-forming) activity;GO:0000287//magnesium ion binding;GO:0005524//ATP binding;GO:0005739//mitochondrion
Unigene16699_All	1368	ko01110//Biosynthesis of secondary metabolites;ko01200//Carbon metabolism;ko01100//Metabolic pathways;ko00020//Citrate cycle (TCA cycle);ko00190//Oxidative phosphorylation	Metabolism	Global and overview maps;Energy metabolism;Carbohydrate metabolism	-2.60325	3.83494e-14	1.23092e-14	K00234//succinate dehydrogenase (ubiquinone) flavoprotein subunit [EC:1.3.5.1]+ko00020//Citrate cycle (TCA cycle)+ko01100//Metabolic pathways+ko00190//Oxidative phosphorylation+ko01110//Biosynthesis of secondary metabolites+ko01200//Carbon metabolism;K00234//succinate dehydrogenase (ubiquinone) flavoprotein subunit [EC:1.3.5.1]+ko00020//Citrate cycle (TCA cycle)+ko01100//Metabolic pathways+ko0019…	FAD binding domain		NADH-dependent fumarate reductase [Ectocarpus siliculosus]	[C] KOG2403 Succinate dehydrogenase, flavoprotein subunit	Succinate dehydrogenase [ubiquinone] flavoprotein subunit 1, mitochondrial OS=Arabidopsis thaliana GN=SDH1-1 PE=1 SV=1	GO:0000104//succinate dehydrogenase activity
CL936.Contig2_All	4340	ko00010//Glycolysis / Gluconeogenesis;ko01200//Carbon metabolism;ko01110//Biosynthesis of secondary metabolites;ko01100//Metabolic pathways;ko00620//Pyruvate metabolism;ko00020//Citrate cycle (TCA cycle)	Metabolism	Carbohydrate metabolism;Global and overview maps	-2.63927	4.02824e-87	3.62068e-88	K00162//pyruvate dehydrogenase E1 component beta subunit [EC:1.2.4.1]+ko00010//Glycolysis / Gluconeogenesis+ko00020//Citrate cycle (TCA cycle)+ko01100//Metabolic pathways+ko01110//Biosynthesis of secondary metabolites+ko00620//Pyruvate metabolism+ko01200//Carbon metabolism;K00162//pyruvate dehydrogenase E1 component beta subunit [EC:1.2.4.1]+ko00010//Glycolysis / Gluconeogenesis+ko00020//Citrate …	Dehydrogenase E1 component	KJ532065.1 Kappaphycus alvarezii DNA marker SXBA04 genomic sequence	pyruvate dehydrogenase E1 component beta subunit, mitochondrial precursor (ISS) [Ostreococcus tauri]	[C] KOG0524 Pyruvate dehydrogenase E1, beta subunit	Pyruvate dehydrogenase E1 component subunit beta-2, mitochondrial OS=Oryza sativa subsp. japonica GN=Os09g0509200 PE=2 SV=1	GO:0004739//pyruvate dehydrogenase (acetyl-transferring) activity;GO:0006086//acetyl-CoA biosynthetic process from pyruvate
Unigene37336_All	1600	ko01210//2-Oxocarboxylic acid metabolism;ko01100//Metabolic pathways;ko01110//Biosynthesis of secondary metabolites;ko00630//Glyoxylate and dicarboxylate metabolism;ko01200//Carbon metabolism;ko00020//Citrate cycle (TCA cycle);ko01230//Biosynthesis of amino acids	Metabolism	Global and overview maps;Carbohydrate metabolism	-2.77137	6.43359e-23	1.48636e-23	K01647//citrate synthase [EC:2.3.3.1]+ko00020//Citrate cycle (TCA cycle)+ko01230//Biosynthesis of amino acids+ko01100//Metabolic pathways+ko01110//Biosynthesis of secondary metabolites+ko01210//2-Oxocarboxylic acid metabolism+ko01200//Carbon metabolism+ko00630//Glyoxylate and dicarboxylate metabolism;K01647//citrate synthase [EC:2.3.3.1]+ko00020//Citrate cycle (TCA cycle)+ko01230//Biosynthesis of…	Citrate synthase, C-terminal domain		hypothetical protein VOLCADRAFT_101520 [Volvox carteri f. nagariensis] >EFJ38926.1 hypothetical protein VOLCADRAFT_101520 [Volvox carteri f. nagariensis]	[C] KOG2617 Citrate synthase	Citrate synthase 2, peroxisomal OS=Arabidopsis thaliana GN=CSY2 PE=2 SV=1	GO:0006099//tricarboxylic acid cycle;GO:0004108//citrate (Si)-synthase activity;GO:0005737//cytoplasm
Unigene57182_All	2836	ko01200//Carbon metabolism;ko01110//Biosynthesis of secondary metabolites;ko00190//Oxidative phosphorylation;ko00020//Citrate cycle (TCA cycle);ko01100//Metabolic pathways	Metabolism	Carbohydrate metabolism;Energy metabolism;Global and overview maps	-2.77763	3.8514e-25	8.36965e-26	K00234//succinate dehydrogenase (ubiquinone) flavoprotein subunit [EC:1.3.5.1]+ko00020//Citrate cycle (TCA cycle)+ko01100//Metabolic pathways+ko00190//Oxidative phosphorylation+ko01110//Biosynthesis of secondary metabolites+ko01200//Carbon metabolism;K00234//succinate dehydrogenase (ubiquinone) flavoprotein subunit [EC:1.3.5.1]+ko00020//Citrate cycle (TCA cycle)+ko01100//Metabolic pathways+ko0019…	FAD binding domain	XM_009534609.1 Phytophthora sojae hypothetical protein partial mRNA	succinate dehydrogenase subunit A, mitochondrial [Volvox carteri f. nagariensis] >EFJ49184.1 succinate dehydrogenase subunit A, mitochondrial [Volvox carteri f. nagariensis]	[C] KOG2403 Succinate dehydrogenase, flavoprotein subunit	Succinate dehydrogenase [ubiquinone] flavoprotein subunit 1, mitochondrial OS=Arabidopsis thaliana GN=SDH1-1 PE=1 SV=1	GO:0009055//electron transfer activity;GO:0005524//ATP binding;GO:0006121//mitochondrial electron transport, succinate to ubiquinone;GO:0050660//flavin adenine dinucleotide binding;GO:0050897//cobalt ion binding;GO:0045273//respiratory chain complex II;GO:0006099//tricarboxylic acid cycle;GO:0022900//electron transport chain;GO:0000104//succinate dehydrogenase activity;GO:0005749//mitochondrial r…
Unigene485_All	1648	ko01110//Biosynthesis of secondary metabolites;ko01200//Carbon metabolism;ko00710//Carbon fixation in photosynthetic organisms;ko00620//Pyruvate metabolism;ko00010//Glycolysis / Gluconeogenesis;ko00020//Citrate cycle (TCA cycle);ko01100//Metabolic pathways	Metabolism	Global and overview maps;Carbohydrate metabolism;Energy metabolism	-2.8957	6.80374e-19	1.79301e-19	K01610//phosphoenolpyruvate carboxykinase (ATP) [EC:4.1.1.49]+ko00010//Glycolysis / Gluconeogenesis+ko00020//Citrate cycle (TCA cycle)+ko01100//Metabolic pathways+ko01110//Biosynthesis of secondary metabolites+ko00710//Carbon fixation in photosynthetic organisms+ko00620//Pyruvate metabolism+ko01200//Carbon metabolism;K01610//phosphoenolpyruvate carboxykinase (ATP) [EC:4.1.1.49]+ko00010//Glycolysi…	Phosphoenolpyruvate carboxykinase		phosphoenolpyruvate carboxykinase (ATP) [Phytophthora parasitica]	[C] TWOG0797 Phosphoenolpyruvate carboxykinase (ATP)	Phosphoenolpyruvate carboxykinase (ATP) OS=Arabidopsis thaliana GN=PCKA PE=1 SV=1	GO:0005524//ATP binding;GO:0006094//gluconeogenesis;GO:0016301//kinase activity;GO:0004612//phosphoenolpyruvate carboxykinase (ATP) activity
CL2755.Contig3_All	893	ko01200//Carbon metabolism;ko00020//Citrate cycle (TCA cycle);ko01110//Biosynthesis of secondary metabolites;ko01100//Metabolic pathways;ko00640//Propanoate metabolism	Metabolism	Carbohydrate metabolism;Global and overview maps	-2.93799	2.76687e-06	1.50278e-06	K01899//succinyl-CoA synthetase alpha subunit [EC:6.2.1.4 6.2.1.5]+ko00020//Citrate cycle (TCA cycle)+ko00640//Propanoate metabolism+ko01100//Metabolic pathways+ko01110//Biosynthesis of secondary metabolites+ko01200//Carbon metabolism;K01899//succinyl-CoA synthetase alpha subunit [EC:6.2.1.4 6.2.1.5]+ko00020//Citrate cycle (TCA cycle)+ko00640//Propanoate metabolism+ko01100//Metabolic pathways+ko0…	CoA binding domain	XM_009040017.1 Aureococcus anophagefferens hypothetical protein partial mRNA	Succinyl-CoA ligase [Phytophthora megakarya]	[C] KOG1255 Succinyl-CoA synthetase, alpha subunit	Succinate--CoA ligase [ADP-forming] subunit alpha-1, mitochondrial OS=Solanum lycopersicum GN=SCOA PE=1 SV=1	GO:0006099//tricarboxylic acid cycle;GO:0004775//succinate-CoA ligase (ADP-forming) activity;GO:0005759//mitochondrial matrix;GO:0000166//nucleotide binding;GO:0048037//cofactor binding;GO:0005739//mitochondrion;GO:0004776//succinate-CoA ligase (GDP-forming) activity
Unigene86158_All	638	ko00260//Glycine, serine and threonine metabolism;ko00630//Glyoxylate and dicarboxylate metabolism;ko01110//Biosynthesis of secondary metabolites;ko00020//Citrate cycle (TCA cycle);ko00280//Valine, leucine and isoleucine degradation;ko00620//Pyruvate metabolism;ko01100//Metabolic pathways;ko01200//Carbon metabolism;ko00010//Glycolysis / Gluconeogenesis;ko00640//Propanoate metabolism	Metabolism	Amino acid metabolism;Global and overview maps;Carbohydrate metabolism	-3.38455	1.46995e-81	1.38479e-82	K00382//dihydrolipoamide dehydrogenase [EC:1.8.1.4]+ko00010//Glycolysis / Gluconeogenesis+ko00020//Citrate cycle (TCA cycle)+ko00280//Valine, leucine and isoleucine degradation+ko00640//Propanoate metabolism+ko01100//Metabolic pathways+ko01110//Biosynthesis of secondary metabolites+ko00260//Glycine, serine and threonine metabolism+ko00620//Pyruvate metabolism+ko01200//Carbon metabolism+ko00630//G…	Pyridine nucleotide-disulphide oxidoreductase		mercuric reductase [Ectocarpus siliculosus]	[C] KOG1335 Dihydrolipoamide dehydrogenase	Dihydrolipoyl dehydrogenase 1, chloroplastic OS=Arabidopsis thaliana GN=LPD1 PE=2 SV=1	GO:0009055//electron transfer activity;GO:0005623//cell;GO:0050660//flavin adenine dinucleotide binding;GO:0016021//integral component of membrane;GO:0016668//oxidoreductase activity, acting on a sulfur group of donors, NAD(P) as acceptor;GO:0045454//cell redox homeostasis;GO:0016491//oxidoreductase activity
Unigene69769_All	956	ko01200//Carbon metabolism;ko01110//Biosynthesis of secondary metabolites;ko01100//Metabolic pathways;ko00020//Citrate cycle (TCA cycle);ko00310//Lysine degradation	Metabolism	Carbohydrate metabolism;Global and overview maps;Amino acid metabolism	-3.40364	4.39469e-07	2.21031e-07	K00658//2-oxoglutarate dehydrogenase E2 component (dihydrolipoamide succinyltransferase) [EC:2.3.1.61]+ko00310//Lysine degradation+ko00020//Citrate cycle (TCA cycle)+ko01100//Metabolic pathways+ko01110//Biosynthesis of secondary metabolites+ko01200//Carbon metabolism;K00658//2-oxoglutarate dehydrogenase E2 component (dihydrolipoamide succinyltransferase) [EC:2.3.1.61]+ko00310//Lysine degradation+…	2-oxoacid dehydrogenases acyltransferase (catalytic domain)		unknown [Picea sitchensis]	[C] KOG0559 Dihydrolipoamide succinyltransferase (2-oxoglutarate dehydrogenase, E2 subunit)	Dihydrolipoyllysine-residue succinyltransferase component of 2-oxoglutarate dehydrogenase complex 2, mitochondrial OS=Arabidopsis thaliana GN=At4g26910 PE=1 SV=2	GO:0006099//tricarboxylic acid cycle;GO:0045252//oxoglutarate dehydrogenase complex;GO:0004149//dihydrolipoyllysine-residue succinyltransferase activity
CL8852.Contig2_All	742	ko01100//Metabolic pathways;ko01110//Biosynthesis of secondary metabolites;ko01230//Biosynthesis of amino acids;ko00020//Citrate cycle (TCA cycle);ko00630//Glyoxylate and dicarboxylate metabolism;ko01210//2-Oxocarboxylic acid metabolism;ko01200//Carbon metabolism	Metabolism	Carbohydrate metabolism;Global and overview maps	-3.44944	2.45749e-07	1.20802e-07	K01647//citrate synthase [EC:2.3.3.1]+ko00020//Citrate cycle (TCA cycle)+ko01230//Biosynthesis of amino acids+ko01100//Metabolic pathways+ko01110//Biosynthesis of secondary metabolites+ko01210//2-Oxocarboxylic acid metabolism+ko01200//Carbon metabolism+ko00630//Glyoxylate and dicarboxylate metabolism;K01647//citrate synthase [EC:2.3.3.1]+ko00020//Citrate cycle (TCA cycle)+ko01230//Biosynthesis of…	Citrate synthase, C-terminal domain		citrate synthase I [Ostreococcus tauri]	[C] KOG2617 Citrate synthase	Citrate synthase 3, peroxisomal OS=Arabidopsis thaliana GN=CSY3 PE=2 SV=1	GO:0006099//tricarboxylic acid cycle;GO:0004108//citrate (Si)-synthase activity;GO:0005737//cytoplasm
CL4949.Contig1_All	879	ko01100//Metabolic pathways;ko00190//Oxidative phosphorylation;ko00020//Citrate cycle (TCA cycle);ko01200//Carbon metabolism;ko01110//Biosynthesis of secondary metabolites	Metabolism	Energy metabolism;Global and overview maps;Carbohydrate metabolism	-3.44948	6.96272e-46	9.96783e-47	K00234//succinate dehydrogenase (ubiquinone) flavoprotein subunit [EC:1.3.5.1]+ko00020//Citrate cycle (TCA cycle)+ko01100//Metabolic pathways+ko00190//Oxidative phosphorylation+ko01110//Biosynthesis of secondary metabolites+ko01200//Carbon metabolism;K00234//succinate dehydrogenase (ubiquinone) flavoprotein subunit [EC:1.3.5.1]+ko00020//Citrate cycle (TCA cycle)+ko01100//Metabolic pathways+ko0019…	FAD binding domain		NADH-dependent fumarate reductase [Ectocarpus siliculosus]	[C] KOG2404 Fumarate reductase, flavoprotein subunit	Succinate dehydrogenase [ubiquinone] flavoprotein subunit 1, mitochondrial OS=Arabidopsis thaliana GN=SDH1-1 PE=1 SV=1	GO:0000104//succinate dehydrogenase activity
Unigene41449_All	1509	ko01110//Biosynthesis of secondary metabolites;ko00620//Pyruvate metabolism;ko00270//Cysteine and methionine metabolism;ko01200//Carbon metabolism;ko01100//Metabolic pathways;ko00020//Citrate cycle (TCA cycle);ko00630//Glyoxylate and dicarboxylate metabolism;ko00710//Carbon fixation in photosynthetic organisms	Metabolism	Carbohydrate metabolism;Energy metabolism;Global and overview maps;Amino acid metabolism	-3.53108	0	0	K00026//malate dehydrogenase [EC:1.1.1.37]+ko00020//Citrate cycle (TCA cycle)+ko01100//Metabolic pathways+ko01110//Biosynthesis of secondary metabolites+ko00710//Carbon fixation in photosynthetic organisms+ko00620//Pyruvate metabolism+ko00270//Cysteine and methionine metabolism+ko01200//Carbon metabolism+ko00630//Glyoxylate and dicarboxylate metabolism;K00026//malate dehydrogenase [EC:1.1.1.37]+k…	lactate/malate dehydrogenase, alpha/beta C-terminal domain		malate dehydrogenase [Sargassum thunbergii]	[C] KOG1494 NAD-dependent malate dehydrogenase	Malate dehydrogenase, glyoxysomal OS=Oryza sativa subsp. japonica GN=Os12g0632700 PE=1 SV=3
CL4597.Contig1_All	1540	ko00710//Carbon fixation in photosynthetic organisms;ko00270//Cysteine and methionine metabolism;ko01200//Carbon metabolism;ko00630//Glyoxylate and dicarboxylate metabolism;ko01100//Metabolic pathways;ko00020//Citrate cycle (TCA cycle);ko01110//Biosynthesis of secondary metabolites;ko00620//Pyruvate metabolism	Metabolism	Carbohydrate metabolism;Global and overview maps;Energy metabolism;Amino acid metabolism	-3.59495	0	0	K00026//malate dehydrogenase [EC:1.1.1.37]+ko00020//Citrate cycle (TCA cycle)+ko01100//Metabolic pathways+ko01110//Biosynthesis of secondary metabolites+ko00710//Carbon fixation in photosynthetic organisms+ko00620//Pyruvate metabolism+ko00270//Cysteine and methionine metabolism+ko01200//Carbon metabolism+ko00630//Glyoxylate and dicarboxylate metabolism;K00026//malate dehydrogenase [EC:1.1.1.37]+k…	lactate/malate dehydrogenase, alpha/beta C-terminal domain		malate dehydrogenase [Sargassum thunbergii]	[C] KOG1494 NAD-dependent malate dehydrogenase	Malate dehydrogenase, glyoxysomal OS=Oryza sativa subsp. japonica GN=Os12g0632700 PE=1 SV=3
CL7257.Contig9_All	2402	ko01110//Biosynthesis of secondary metabolites;ko00620//Pyruvate metabolism;ko00010//Glycolysis / Gluconeogenesis;ko00710//Carbon fixation in photosynthetic organisms;ko01100//Metabolic pathways;ko00020//Citrate cycle (TCA cycle);ko01200//Carbon metabolism	Metabolism	Carbohydrate metabolism;Energy metabolism;Global and overview maps	-3.70591	6.74762e-301	2.31251e-302	K01610//phosphoenolpyruvate carboxykinase (ATP) [EC:4.1.1.49]+ko00010//Glycolysis / Gluconeogenesis+ko00020//Citrate cycle (TCA cycle)+ko01100//Metabolic pathways+ko01110//Biosynthesis of secondary metabolites+ko00710//Carbon fixation in photosynthetic organisms+ko00620//Pyruvate metabolism+ko01200//Carbon metabolism;K01610//phosphoenolpyruvate carboxykinase (ATP) [EC:4.1.1.49]+ko00010//Glycolysi…	Phosphoenolpyruvate carboxykinase		phosphoenolpyruvate carboxykinase [Nannochloropsis gaditana]	[C] TWOG0797 Phosphoenolpyruvate carboxykinase (ATP)	Phosphoenolpyruvate carboxykinase (ATP) OS=Arabidopsis thaliana GN=PCKA PE=1 SV=1	GO:0005524//ATP binding;GO:0006094//gluconeogenesis;GO:0016301//kinase activity;GO:0005829//cytosol;GO:0004612//phosphoenolpyruvate carboxykinase (ATP) activity
CL895.Contig1_All	695	ko01200//Carbon metabolism;ko00190//Oxidative phosphorylation;ko01100//Metabolic pathways;ko01110//Biosynthesis of secondary metabolites;ko00020//Citrate cycle (TCA cycle)	Metabolism	Energy metabolism;Global and overview maps;Carbohydrate metabolism	-3.79953	0.000371169	0.000265399	K00235//succinate dehydrogenase (ubiquinone) iron-sulfur subunit [EC:1.3.5.1]+ko00020//Citrate cycle (TCA cycle)+ko01100//Metabolic pathways+ko00190//Oxidative phosphorylation+ko01110//Biosynthesis of secondary metabolites+ko01200//Carbon metabolism;K00235//succinate dehydrogenase (ubiquinone) iron-sulfur subunit [EC:1.3.5.1]+ko00020//Citrate cycle (TCA cycle)+ko01100//Metabolic pathways+ko00190/…	2Fe-2S iron-sulfur cluster binding domain	XM_009520990.1 Phytophthora sojae hypothetical protein mRNA	SDH2, succinate dehydrogenase subunit 2 [Ectocarpus siliculosus]	[C] KOG3049 Succinate dehydrogenase, Fe-S protein subunit	Succinate dehydrogenase [ubiquinone] iron-sulfur subunit 1, mitochondrial OS=Arabidopsis thaliana GN=SDH2-1 PE=1 SV=2	GO:0009055//electron transfer activity;GO:0051537//2 iron, 2 sulfur cluster binding;GO:0006099//tricarboxylic acid cycle;GO:0046872//metal ion binding;GO:0005743//mitochondrial inner membrane;GO:0051539//4 iron, 4 sulfur cluster binding;GO:0008177//succinate dehydrogenase (ubiquinone) activity;GO:0051538//3 iron, 4 sulfur cluster binding
Unigene65662_All	840	ko01200//Carbon metabolism;ko00620//Pyruvate metabolism;ko01100//Metabolic pathways;ko01110//Biosynthesis of secondary metabolites;ko00020//Citrate cycle (TCA cycle)	Metabolism	Global and overview maps;Carbohydrate metabolism	-3.84176	0.000376731	0.000270104	K01679//fumarate hydratase, class II [EC:4.2.1.2]+ko00020//Citrate cycle (TCA cycle)+ko01100//Metabolic pathways+ko01110//Biosynthesis of secondary metabolites+ko00620//Pyruvate metabolism+ko01200//Carbon metabolism;K01679//fumarate hydratase, class II [EC:4.2.1.2]+ko00020//Citrate cycle (TCA cycle)+ko01100//Metabolic pathways+ko01110//Biosynthesis of secondary metabolites+ko00620//Pyruvate metab…	Fumarase C C-terminus	XM_009035253.1 Aureococcus anophagefferens hypothetical protein partial mRNA	Fumarate hydratase (Fumarase) [Ectocarpus siliculosus]	[C] KOG1317 Fumarase	Fumarate hydratase 1, mitochondrial OS=Arabidopsis thaliana GN=FUM1 PE=1 SV=2
Unigene69770_All	503	ko00310//Lysine degradation;ko00020//Citrate cycle (TCA cycle);ko01200//Carbon metabolism;ko01100//Metabolic pathways;ko01110//Biosynthesis of secondary metabolites	Metabolism	Amino acid metabolism;Global and overview maps;Carbohydrate metabolism	-3.9413	0.000208698	0.000143657	K00658//2-oxoglutarate dehydrogenase E2 component (dihydrolipoamide succinyltransferase) [EC:2.3.1.61]+ko00310//Lysine degradation+ko00020//Citrate cycle (TCA cycle)+ko01100//Metabolic pathways+ko01110//Biosynthesis of secondary metabolites+ko01200//Carbon metabolism;K00658//2-oxoglutarate dehydrogenase E2 component (dihydrolipoamide succinyltransferase) [EC:2.3.1.61]+ko00310//Lysine degradation+…	2-oxoacid dehydrogenases acyltransferase (catalytic domain)		dihydrolipoamide succinyltransferase component of 2-oxoglutarate dehydrogenase, putative, partial [Ricinus communis]	[C] KOG0559 Dihydrolipoamide succinyltransferase (2-oxoglutarate dehydrogenase, E2 subunit)	Dihydrolipoyllysine-residue succinyltransferase component of 2-oxoglutarate dehydrogenase complex 2, mitochondrial OS=Arabidopsis thaliana GN=At4g26910 PE=1 SV=2	GO:0006099//tricarboxylic acid cycle;GO:0045252//oxoglutarate dehydrogenase complex;GO:0004149//dihydrolipoyllysine-residue succinyltransferase activity
Unigene74727_All	630	ko00620//Pyruvate metabolism;ko01200//Carbon metabolism;ko00020//Citrate cycle (TCA cycle);ko01110//Biosynthesis of secondary metabolites;ko00010//Glycolysis / Gluconeogenesis;ko01100//Metabolic pathways	Metabolism	Global and overview maps;Carbohydrate metabolism	-3.9413	0.000208698	0.000143657	K00627//pyruvate dehydrogenase E2 component (dihydrolipoamide acetyltransferase) [EC:2.3.1.12]+ko00010//Glycolysis / Gluconeogenesis+ko00020//Citrate cycle (TCA cycle)+ko01100//Metabolic pathways+ko01110//Biosynthesis of secondary metabolites+ko00620//Pyruvate metabolism+ko01200//Carbon metabolism;K00627//pyruvate dehydrogenase E2 component (dihydrolipoamide acetyltransferase) [EC:2.3.1.12]+ko000…	e3 binding domain		dihydrolipoamide acetyltransferase [Chlamydomonas reinhardtii] >EDP01882.1 dihydrolipoamide acetyltransferase [Chlamydomonas reinhardtii]	[C] KOG0557 Dihydrolipoamide acetyltransferase	Dihydrolipoyllysine-residue acetyltransferase component 5 of pyruvate dehydrogenase complex, chloroplastic OS=Arabidopsis thaliana GN=EMB3003 PE=2 SV=1	GO:0005759//mitochondrial matrix;GO:0004742//dihydrolipoyllysine-residue acetyltransferase activity;GO:0006090//pyruvate metabolic process;GO:0016746//transferase activity, transferring acyl groups;GO:0008061//chitin binding;GO:0045254//pyruvate dehydrogenase complex;GO:0006030//chitin metabolic process;GO:0005576//extracellular region
Unigene62165_All	1584	ko00010//Glycolysis / Gluconeogenesis;ko00640//Propanoate metabolism;ko00020//Citrate cycle (TCA cycle);ko00630//Glyoxylate and dicarboxylate metabolism;ko00620//Pyruvate metabolism;ko01110//Biosynthesis of secondary metabolites;ko00260//Glycine, serine and threonine metabolism;ko01200//Carbon metabolism;ko00280//Valine, leucine and isoleucine degradation;ko01100//Metabolic pathways	Metabolism	Global and overview maps;Amino acid metabolism;Carbohydrate metabolism	-3.9604	3.64538e-17	1.02945e-17	K00382//dihydrolipoamide dehydrogenase [EC:1.8.1.4]+ko00010//Glycolysis / Gluconeogenesis+ko00020//Citrate cycle (TCA cycle)+ko00280//Valine, leucine and isoleucine degradation+ko00640//Propanoate metabolism+ko01100//Metabolic pathways+ko01110//Biosynthesis of secondary metabolites+ko00260//Glycine, serine and threonine metabolism+ko00620//Pyruvate metabolism+ko01200//Carbon metabolism+ko00630//G…	Pyridine nucleotide-disulphide oxidoreductase		hypothetical protein CEUSTIGMA_g8156.t1 [Chlamydomonas eustigma]	[C] KOG1335 Dihydrolipoamide dehydrogenase	Leghemoglobin reductase OS=Vigna unguiculata GN=FLBR PE=1 SV=1
CL389.Contig5_All	2673	ko01100//Metabolic pathways;ko00020//Citrate cycle (TCA cycle);ko01110//Biosynthesis of secondary metabolites;ko00630//Glyoxylate and dicarboxylate metabolism;ko01230//Biosynthesis of amino acids;ko01210//2-Oxocarboxylic acid metabolism;ko01200//Carbon metabolism	Metabolism	Global and overview maps;Carbohydrate metabolism	-3.96678	2.71135e-97	2.25489e-98	K01681//aconitate hydratase [EC:4.2.1.3]+ko00020//Citrate cycle (TCA cycle)+ko01230//Biosynthesis of amino acids+ko01100//Metabolic pathways+ko01110//Biosynthesis of secondary metabolites+ko01210//2-Oxocarboxylic acid metabolism+ko01200//Carbon metabolism+ko00630//Glyoxylate and dicarboxylate metabolism;K01681//aconitate hydratase [EC:4.2.1.3]+ko00020//Citrate cycle (TCA cycle)+ko01230//Biosynthe…	Aconitase family (aconitate hydratase)		aconitate hydratase, cytoplasmic-like [Dorcoceras hygrometricum]	[AJ] KOG0452 RNA-binding translational regulator IRP (aconitase superfamily)	Aconitate hydratase, cytoplasmic OS=Cucurbita maxima PE=2 SV=1	GO:0003994//aconitate hydratase activity;GO:0008152//metabolic process;GO:0051539//4 iron, 4 sulfur cluster binding
CL7257.Contig8_All	2441	ko01200//Carbon metabolism;ko00710//Carbon fixation in photosynthetic organisms;ko00620//Pyruvate metabolism;ko00010//Glycolysis / Gluconeogenesis;ko00020//Citrate cycle (TCA cycle);ko01100//Metabolic pathways;ko01110//Biosynthesis of secondary metabolites	Metabolism	Carbohydrate metabolism;Energy metabolism;Global and overview maps	-3.97703	0	0	K01610//phosphoenolpyruvate carboxykinase (ATP) [EC:4.1.1.49]+ko00010//Glycolysis / Gluconeogenesis+ko00020//Citrate cycle (TCA cycle)+ko01100//Metabolic pathways+ko01110//Biosynthesis of secondary metabolites+ko00710//Carbon fixation in photosynthetic organisms+ko00620//Pyruvate metabolism+ko01200//Carbon metabolism;K01610//phosphoenolpyruvate carboxykinase (ATP) [EC:4.1.1.49]+ko00010//Glycolysi…	Phosphoenolpyruvate carboxykinase		phosphoenolpyruvate carboxykinase [Nannochloropsis gaditana]	[C] TWOG0797 Phosphoenolpyruvate carboxykinase (ATP)	Phosphoenolpyruvate carboxykinase (ATP) OS=Arabidopsis thaliana GN=PCKA PE=1 SV=1	GO:0005524//ATP binding;GO:0006094//gluconeogenesis;GO:0016301//kinase activity;GO:0005829//cytosol;GO:0004612//phosphoenolpyruvate carboxykinase (ATP) activity
CL8852.Contig3_All	1600	ko01200//Carbon metabolism;ko01110//Biosynthesis of secondary metabolites;ko00630//Glyoxylate and dicarboxylate metabolism;ko01210//2-Oxocarboxylic acid metabolism;ko00020//Citrate cycle (TCA cycle);ko01230//Biosynthesis of amino acids;ko01100//Metabolic pathways	Metabolism	Carbohydrate metabolism;Global and overview maps	-4.06415	4.33606e-22	1.02627e-22	K01647//citrate synthase [EC:2.3.3.1]+ko00020//Citrate cycle (TCA cycle)+ko01230//Biosynthesis of amino acids+ko01100//Metabolic pathways+ko01110//Biosynthesis of secondary metabolites+ko01210//2-Oxocarboxylic acid metabolism+ko01200//Carbon metabolism+ko00630//Glyoxylate and dicarboxylate metabolism;K01647//citrate synthase [EC:2.3.3.1]+ko00020//Citrate cycle (TCA cycle)+ko01230//Biosynthesis of…	Citrate synthase, C-terminal domain		citrate synthase I [Ostreococcus tauri]	[C] KOG2617 Citrate synthase	Citrate synthase 3, peroxisomal OS=Arabidopsis thaliana GN=CSY3 PE=2 SV=1	GO:0006099//tricarboxylic acid cycle;GO:0004108//citrate (Si)-synthase activity;GO:0005737//cytoplasm
CL806.Contig1_All	1452	ko00020//Citrate cycle (TCA cycle);ko01110//Biosynthesis of secondary metabolites;ko01100//Metabolic pathways	Metabolism	Global and overview maps;Carbohydrate metabolism	-4.12078	9.65663e-27	2.01928e-27	K01648//ATP citrate (pro-S)-lyase [EC:2.3.3.8]+ko00020//Citrate cycle (TCA cycle)+ko01100//Metabolic pathways+ko01110//Biosynthesis of secondary metabolites;K01648//ATP citrate (pro-S)-lyase [EC:2.3.3.8]+ko00020//Citrate cycle (TCA cycle)+ko01100//Metabolic pathways+ko01110//Biosynthesis of secondary metabolites;K01648//ATP citrate (pro-S)-lyase [EC:2.3.3.8]+ko00020//Citrate cycle (TCA cycle)+ko0…	ATP citrate lyase citrate-binding		ATP-citrate synthase [Saprolegnia diclina VS20] >EQC39635.1 ATP-citrate synthase [Saprolegnia diclina VS20]	[C] KOG1254 ATP-citrate lyase	ATP-citrate synthase alpha chain protein 2 OS=Arabidopsis thaliana GN=ACLA-2 PE=2 SV=1	GO:0006101//citrate metabolic process;GO:0006085//acetyl-CoA biosynthetic process;GO:0003878//ATP citrate synthase activity;GO:0046872//metal ion binding;GO:0005524//ATP binding;GO:0048037//cofactor binding;GO:0005737//cytoplasm;GO:0006629//lipid metabolic process
Unigene65673_All	892	ko00310//Lysine degradation;ko01200//Carbon metabolism;ko00380//Tryptophan metabolism;ko01110//Biosynthesis of secondary metabolites;ko00020//Citrate cycle (TCA cycle);ko01100//Metabolic pathways	Metabolism	Carbohydrate metabolism;Global and overview maps;Amino acid metabolism	-4.28233	1.96001e-05	1.17473e-05	K00164//2-oxoglutarate dehydrogenase E1 component [EC:1.2.4.2]+ko00310//Lysine degradation+ko00020//Citrate cycle (TCA cycle)+ko00380//Tryptophan metabolism+ko01100//Metabolic pathways+ko01110//Biosynthesis of secondary metabolites+ko01200//Carbon metabolism;K00164//2-oxoglutarate dehydrogenase E1 component [EC:1.2.4.2]+ko00310//Lysine degradation+ko00020//Citrate cycle (TCA cycle)+ko00380//Trypt…	Dehydrogenase E1 component		2-oxoglutarate dehydrogenase E1 component [Klebsormidium nitens]	[G] KOG0450 2-oxoglutarate dehydrogenase, E1 subunit		GO:0006099//tricarboxylic acid cycle;GO:0004591//oxoglutarate dehydrogenase (succinyl-transferring) activity;GO:0030976//thiamine pyrophosphate binding
Unigene72072_All	795	ko00020//Citrate cycle (TCA cycle);ko00640//Propanoate metabolism;ko01200//Carbon metabolism;ko01110//Biosynthesis of secondary metabolites;ko01100//Metabolic pathways	Metabolism	Global and overview maps;Carbohydrate metabolism	-4.28233	1.96001e-05	1.17473e-05	K01900//succinyl-CoA synthetase beta subunit [EC:6.2.1.4 6.2.1.5]+ko00020//Citrate cycle (TCA cycle)+ko00640//Propanoate metabolism+ko01100//Metabolic pathways+ko01110//Biosynthesis of secondary metabolites+ko01200//Carbon metabolism;K01900//succinyl-CoA synthetase beta subunit [EC:6.2.1.4 6.2.1.5]+ko00020//Citrate cycle (TCA cycle)+ko00640//Propanoate metabolism+ko01100//Metabolic pathways+ko011…	TIR domain	XM_005843766.1 Chlorella variabilis hypothetical protein (CHLNCDRAFT_139908) mRNA, complete cds	hypothetical protein AURANDRAFT_28673 [Aureococcus anophagefferens] >EGB06827.1 hypothetical protein AURANDRAFT_28673 [Aureococcus anophagefferens]	[C] KOG2799 Succinyl-CoA synthetase, beta subunit	Succinate--CoA ligase [ADP-forming] subunit beta, mitochondrial OS=Oryza sativa subsp. japonica GN=Os02g0621700 PE=1 SV=1	GO:0006099//tricarboxylic acid cycle;GO:0004775//succinate-CoA ligase (ADP-forming) activity;GO:0000287//magnesium ion binding;GO:0005524//ATP binding;GO:0005739//mitochondrion
Unigene8858_All	1669	ko01110//Biosynthesis of secondary metabolites;ko01100//Metabolic pathways;ko00630//Glyoxylate and dicarboxylate metabolism;ko01230//Biosynthesis of amino acids;ko00020//Citrate cycle (TCA cycle);ko01200//Carbon metabolism;ko01210//2-Oxocarboxylic acid metabolism	Metabolism	Carbohydrate metabolism;Global and overview maps	-4.39023	1.60067e-10	6.23969e-11	K01647//citrate synthase [EC:2.3.3.1]+ko00020//Citrate cycle (TCA cycle)+ko01230//Biosynthesis of amino acids+ko01100//Metabolic pathways+ko01110//Biosynthesis of secondary metabolites+ko01210//2-Oxocarboxylic acid metabolism+ko01200//Carbon metabolism+ko00630//Glyoxylate and dicarboxylate metabolism;K01647//citrate synthase [EC:2.3.3.1]+ko00020//Citrate cycle (TCA cycle)+ko01230//Biosynthesis of…	Concanavalin A-like lectin/glucanases superfamily		hypothetical protein VOLCADRAFT_79930 [Volvox carteri f. nagariensis] >EFJ51043.1 hypothetical protein VOLCADRAFT_79930 [Volvox carteri f. nagariensis]	[C] KOG2617 Citrate synthase	Citrate synthase, mitochondrial OS=Daucus carota GN=CS PE=2 SV=1	GO:0006099//tricarboxylic acid cycle;GO:0004108//citrate (Si)-synthase activity
Unigene28888_All	1117	ko01100//Metabolic pathways;ko01230//Biosynthesis of amino acids;ko01110//Biosynthesis of secondary metabolites;ko00630//Glyoxylate and dicarboxylate metabolism;ko00020//Citrate cycle (TCA cycle);ko00640//Propanoate metabolism;ko01200//Carbon metabolism;ko01210//2-Oxocarboxylic acid metabolism	Metabolism	Carbohydrate metabolism;Global and overview maps	-4.42672	1.30845e-10	5.07637e-11	K01682//aconitate hydratase 2 / 2-methylisocitrate dehydratase [EC:4.2.1.3 4.2.1.99]+ko00020//Citrate cycle (TCA cycle)+ko01230//Biosynthesis of amino acids+ko00640//Propanoate metabolism+ko01100//Metabolic pathways+ko01110//Biosynthesis of secondary metabolites+ko01210//2-Oxocarboxylic acid metabolism+ko01200//Carbon metabolism+ko00630//Glyoxylate and dicarboxylate metabolism;K01682//aconitate h…	Aconitase family (aconitate hydratase)		aconitate hydratase 2 / 2-methylisocitrate dehydratase [Fistulifera solaris]			GO:0006099//tricarboxylic acid cycle;GO:0003994//aconitate hydratase activity;GO:0005829//cytosol;GO:0051539//4 iron, 4 sulfur cluster binding
CL389.Contig4_All	2754	ko01100//Metabolic pathways;ko00630//Glyoxylate and dicarboxylate metabolism;ko01230//Biosynthesis of amino acids;ko01210//2-Oxocarboxylic acid metabolism;ko01200//Carbon metabolism;ko00020//Citrate cycle (TCA cycle);ko01110//Biosynthesis of secondary metabolites	Metabolism	Global and overview maps;Carbohydrate metabolism	-4.4441	6.83535e-44	1.00508e-44	K01681//aconitate hydratase [EC:4.2.1.3]+ko00020//Citrate cycle (TCA cycle)+ko01230//Biosynthesis of amino acids+ko01100//Metabolic pathways+ko01110//Biosynthesis of secondary metabolites+ko01210//2-Oxocarboxylic acid metabolism+ko01200//Carbon metabolism+ko00630//Glyoxylate and dicarboxylate metabolism;K01681//aconitate hydratase [EC:4.2.1.3]+ko00020//Citrate cycle (TCA cycle)+ko01230//Biosynthe…	Aconitase family (aconitate hydratase)		aconitate hydratase, cytoplasmic-like [Dorcoceras hygrometricum]	[AJ] KOG0452 RNA-binding translational regulator IRP (aconitase superfamily)	Aconitate hydratase, cytoplasmic OS=Cucurbita maxima PE=2 SV=1
Unigene36664_All	421	ko01210//2-Oxocarboxylic acid metabolism;ko00020//Citrate cycle (TCA cycle);ko01230//Biosynthesis of amino acids;ko01100//Metabolic pathways;ko01110//Biosynthesis of secondary metabolites;ko01200//Carbon metabolism	Metabolism	Carbohydrate metabolism;Global and overview maps	-4.49384	0.000965735	0.000743173	K00030//isocitrate dehydrogenase (NAD+) [EC:1.1.1.41]+ko00020//Citrate cycle (TCA cycle)+ko01230//Biosynthesis of amino acids+ko01100//Metabolic pathways+ko01110//Biosynthesis of secondary metabolites+ko01210//2-Oxocarboxylic acid metabolism+ko01200//Carbon metabolism;K00030//isocitrate dehydrogenase (NAD+) [EC:1.1.1.41]+ko00020//Citrate cycle (TCA cycle)+ko01230//Biosynthesis of amino acids+ko01…	Isocitrate/isopropylmalate dehydrogenase		isocitrate dehydrogenase [Klebsormidium nitens]	[E] KOG0785 Isocitrate dehydrogenase, alpha subunit	3-isopropylmalate dehydrogenase, chloroplastic OS=Solanum tuberosum PE=2 SV=1	GO:0006099//tricarboxylic acid cycle;GO:0000287//magnesium ion binding;GO:0004449//isocitrate dehydrogenase (NAD+) activity;GO:0051287//NAD binding;GO:0005739//mitochondrion
Unigene68820_All	400	ko00020//Citrate cycle (TCA cycle);ko01200//Carbon metabolism;ko01110//Biosynthesis of secondary metabolites;ko00190//Oxidative phosphorylation;ko01100//Metabolic pathways	Metabolism	Energy metabolism;Carbohydrate metabolism;Global and overview maps	-4.49384	0.000965735	0.000743173	K00236//succinate dehydrogenase (ubiquinone) cytochrome b560 subunit+ko00020//Citrate cycle (TCA cycle)+ko01100//Metabolic pathways+ko00190//Oxidative phosphorylation+ko01110//Biosynthesis of secondary metabolites+ko01200//Carbon metabolism	Succinate dehydrogenase/Fumarate reductase transmembrane subunit		succinate dehydrogenase cytochrome b560 mitochondrial [Chrysochromulina sp. CCMP291]	[G] KOG0449 Succinate dehydrogenase, cytochrome b subunit	Succinate dehydrogenase cytochrome b560 subunit OS=Marchantia polymorpha GN=SDH3 PE=3 SV=1	GO:0006099//tricarboxylic acid cycle;GO:0009055//electron transfer activity;GO:0000104//succinate dehydrogenase activity;GO:0046872//metal ion binding;GO:0045281//succinate dehydrogenase complex;GO:0016021//integral component of membrane;GO:0005739//mitochondrion
Unigene75977_All	576	ko01100//Metabolic pathways;ko00640//Propanoate metabolism;ko00020//Citrate cycle (TCA cycle);ko01200//Carbon metabolism;ko01110//Biosynthesis of secondary metabolites	Metabolism	Carbohydrate metabolism;Global and overview maps	-4.49384	0.000965735	0.000743173	K01899//succinyl-CoA synthetase alpha subunit [EC:6.2.1.4 6.2.1.5]+ko00020//Citrate cycle (TCA cycle)+ko00640//Propanoate metabolism+ko01100//Metabolic pathways+ko01110//Biosynthesis of secondary metabolites+ko01200//Carbon metabolism;K01899//succinyl-CoA synthetase alpha subunit [EC:6.2.1.4 6.2.1.5]+ko00020//Citrate cycle (TCA cycle)+ko00640//Propanoate metabolism+ko01100//Metabolic pathways+ko0…	CoA binding domain		Succinyl-CoA Synthetase subunit ? (SCS?) [Blastocystis hominis] >CBK23557.2 Succinyl-CoA Synthetase subunit ? (SCS?) [Blastocystis hominis]	[C] KOG1255 Succinyl-CoA synthetase, alpha subunit	Succinate--CoA ligase [ADP-forming] subunit alpha, mitochondrial OS=Oryza sativa subsp. japonica GN=Os07g0577700 PE=1 SV=1	GO:0006099//tricarboxylic acid cycle;GO:0004775//succinate-CoA ligase (ADP-forming) activity;GO:0000166//nucleotide binding;GO:0048037//cofactor binding;GO:0005739//mitochondrion
Unigene62430_All	1286	ko00020//Citrate cycle (TCA cycle);ko00630//Glyoxylate and dicarboxylate metabolism;ko01210//2-Oxocarboxylic acid metabolism;ko01200//Carbon metabolism;ko01100//Metabolic pathways;ko01110//Biosynthesis of secondary metabolites;ko01230//Biosynthesis of amino acids	Metabolism	Carbohydrate metabolism;Global and overview maps	-4.51553	2.67948e-16	7.84056e-17	K01681//aconitate hydratase [EC:4.2.1.3]+ko00020//Citrate cycle (TCA cycle)+ko01230//Biosynthesis of amino acids+ko01100//Metabolic pathways+ko01110//Biosynthesis of secondary metabolites+ko01210//2-Oxocarboxylic acid metabolism+ko01200//Carbon metabolism+ko00630//Glyoxylate and dicarboxylate metabolism;K01681//aconitate hydratase [EC:4.2.1.3]+ko00020//Citrate cycle (TCA cycle)+ko01230//Biosynthe…	Monomeric isocitrate dehydrogenase		hypothetical protein AURANDRAFT_59240 [Aureococcus anophagefferens] >EGB06215.1 hypothetical protein AURANDRAFT_59240 [Aureococcus anophagefferens]			GO:0006099//tricarboxylic acid cycle;GO:0004450//isocitrate dehydrogenase (NADP+) activity
Unigene60356_All	2099	ko01210//2-Oxocarboxylic acid metabolism;ko00630//Glyoxylate and dicarboxylate metabolism;ko01110//Biosynthesis of secondary metabolites;ko01230//Biosynthesis of amino acids;ko01200//Carbon metabolism;ko01100//Metabolic pathways;ko00020//Citrate cycle (TCA cycle)	Metabolism	Global and overview maps;Carbohydrate metabolism	-4.59337	1.46263e-38	2.36424e-39	K01681//aconitate hydratase [EC:4.2.1.3]+ko00020//Citrate cycle (TCA cycle)+ko01230//Biosynthesis of amino acids+ko01100//Metabolic pathways+ko01110//Biosynthesis of secondary metabolites+ko01210//2-Oxocarboxylic acid metabolism+ko01200//Carbon metabolism+ko00630//Glyoxylate and dicarboxylate metabolism;K01681//aconitate hydratase [EC:4.2.1.3]+ko00020//Citrate cycle (TCA cycle)+ko01230//Biosynthe…	Monomeric isocitrate dehydrogenase	XM_005777084.1 Emiliania huxleyi CCMP1516 isocitrate dehydrogenase, NADP-dependent (IDH1), mRNA	isocitrate dehydrogenase/citrate hydrolyase [Dorcoceras hygrometricum]	[WV] KOG1216 von Willebrand factor and related coagulation proteins	Anther-specific proline-rich protein APG (Fragment) OS=Brassica napus GN=APG PE=2 SV=1	GO:0006099//tricarboxylic acid cycle;GO:0003994//aconitate hydratase activity;GO:0004450//isocitrate dehydrogenase (NADP+) activity;GO:0051539//4 iron, 4 sulfur cluster binding
CL6885.Contig2_All	874	ko01110//Biosynthesis of secondary metabolites;ko00020//Citrate cycle (TCA cycle);ko01200//Carbon metabolism;ko00190//Oxidative phosphorylation;ko01100//Metabolic pathways	Metabolism	Carbohydrate metabolism;Global and overview maps;Energy metabolism	-4.61937	1.03639e-06	5.40285e-07	K00234//succinate dehydrogenase (ubiquinone) flavoprotein subunit [EC:1.3.5.1]+ko00020//Citrate cycle (TCA cycle)+ko01100//Metabolic pathways+ko00190//Oxidative phosphorylation+ko01110//Biosynthesis of secondary metabolites+ko01200//Carbon metabolism;K00234//succinate dehydrogenase (ubiquinone) flavoprotein subunit [EC:1.3.5.1]+ko00020//Citrate cycle (TCA cycle)+ko01100//Metabolic pathways+ko0019…	Fumarate reductase flavoprotein C-term		LOW QUALITY PROTEIN: succinate dehydrogenase subunit A [Chlamydomonas reinhardtii] >EDP09580.1 succinate dehydrogenase subunit A [Chlamydomonas reinhardtii]	[C] KOG2403 Succinate dehydrogenase, flavoprotein subunit	Succinate dehydrogenase [ubiquinone] flavoprotein subunit, mitochondrial OS=Oryza sativa subsp. japonica GN=SDH1 PE=1 SV=1	GO:0009055//electron transfer activity;GO:0006121//mitochondrial electron transport, succinate to ubiquinone;GO:0050660//flavin adenine dinucleotide binding;GO:0006099//tricarboxylic acid cycle;GO:0022900//electron transport chain;GO:0005749//mitochondrial respiratory chain complex II, succinate dehydrogenase complex (ubiquinone);GO:0000104//succinate dehydrogenase activity;GO:0005743//mitochondr…
Unigene86782_All	397	ko01100//Metabolic pathways;ko00020//Citrate cycle (TCA cycle);ko01200//Carbon metabolism;ko01110//Biosynthesis of secondary metabolites;ko00190//Oxidative phosphorylation;ko00040//Pentose and glucuronate interconversions	Metabolism	Energy metabolism;Global and overview maps;Carbohydrate metabolism	-4.61937	0.000536232	0.000394685	K00236//succinate dehydrogenase (ubiquinone) cytochrome b560 subunit+ko00020//Citrate cycle (TCA cycle)+ko01100//Metabolic pathways+ko00190//Oxidative phosphorylation+ko01110//Biosynthesis of secondary metabolites+ko01200//Carbon metabolism;K00236//succinate dehydrogenase (ubiquinone) cytochrome b560 subunit+ko00020//Citrate cycle (TCA cycle)+ko01100//Metabolic pathways+ko00190//Oxidative phospho…	Succinate dehydrogenase/Fumarate reductase transmembrane subunit		hypothetical protein POPTR_0014s07830g [Populus trichocarpa] >ERP53132.1 hypothetical protein POPTR_0014s07830g [Populus trichocarpa]	[G] KOG0449 Succinate dehydrogenase, cytochrome b subunit	Proline-rich receptor-like protein kinase PERK2 OS=Arabidopsis thaliana GN=PERK2 PE=2 SV=3	GO:0006099//tricarboxylic acid cycle;GO:0000104//succinate dehydrogenase activity;GO:0046872//metal ion binding;GO:0005749//mitochondrial respiratory chain complex II, succinate dehydrogenase complex (ubiquinone);GO:0006121//mitochondrial electron transport, succinate to ubiquinone;GO:0016021//integral component of membrane
CL37.Contig1_All	663	ko01110//Biosynthesis of secondary metabolites;ko00010//Glycolysis / Gluconeogenesis;ko01100//Metabolic pathways;ko01200//Carbon metabolism;ko00620//Pyruvate metabolism;ko00020//Citrate cycle (TCA cycle)	Metabolism	Global and overview maps;Carbohydrate metabolism	-4.66434	0.000430058	0.00031082	K00162//pyruvate dehydrogenase E1 component beta subunit [EC:1.2.4.1]+ko00010//Glycolysis / Gluconeogenesis+ko00020//Citrate cycle (TCA cycle)+ko01100//Metabolic pathways+ko01110//Biosynthesis of secondary metabolites+ko00620//Pyruvate metabolism+ko01200//Carbon metabolism;K00627//pyruvate dehydrogenase E2 component (dihydrolipoamide acetyltransferase) [EC:2.3.1.12]+ko00010//Glycolysis / Gluconeo…	Biotin-requiring enzyme		dihydrolipoamide acetyltransferase component of pyruvate dehydrogenase, putative, partial [Ricinus communis]	[C] KOG0557 Dihydrolipoamide acetyltransferase	Dihydrolipoyllysine-residue acetyltransferase component 2 of pyruvate dehydrogenase complex, mitochondrial OS=Arabidopsis thaliana GN=At3g13930 PE=1 SV=2	GO:0004739//pyruvate dehydrogenase (acetyl-transferring) activity;GO:0006086//acetyl-CoA biosynthetic process from pyruvate
Unigene71446_All	507	ko01110//Biosynthesis of secondary metabolites;ko01200//Carbon metabolism;ko00640//Propanoate metabolism;ko00020//Citrate cycle (TCA cycle);ko01100//Metabolic pathways	Metabolism	Carbohydrate metabolism;Global and overview maps	-4.73484	0.000298398	0.000210881	K01900//succinyl-CoA synthetase beta subunit [EC:6.2.1.4 6.2.1.5]+ko00020//Citrate cycle (TCA cycle)+ko00640//Propanoate metabolism+ko01100//Metabolic pathways+ko01110//Biosynthesis of secondary metabolites+ko01200//Carbon metabolism;K01900//succinyl-CoA synthetase beta subunit [EC:6.2.1.4 6.2.1.5]+ko00020//Citrate cycle (TCA cycle)+ko00640//Propanoate metabolism+ko01100//Metabolic pathways+ko011…	ATP-grasp domain		Succinyl-CoA ligase subunit beta [Blastocystis sp. ATCC 50177/Nand II]	[C] KOG1447 GTP-specific succinyl-CoA synthetase, beta subunit	Succinate--CoA ligase [ADP-forming] subunit beta OS=Blastocystis sp. subtype 1 (strain ATCC 50177 / NandII) GN=SCSb PE=1 SV=1	GO:0006099//tricarboxylic acid cycle;GO:0004775//succinate-CoA ligase (ADP-forming) activity;GO:0000287//magnesium ion binding;GO:0005524//ATP binding;GO:0005739//mitochondrion
Unigene79625_All	449	ko01110//Biosynthesis of secondary metabolites;ko01200//Carbon metabolism;ko00020//Citrate cycle (TCA cycle);ko00380//Tryptophan metabolism;ko00310//Lysine degradation;ko01100//Metabolic pathways	Metabolism	Amino acid metabolism;Global and overview maps;Carbohydrate metabolism	-4.73484	0.000298398	0.000210881	K00164//2-oxoglutarate dehydrogenase E1 component [EC:1.2.4.2]+ko00310//Lysine degradation+ko00020//Citrate cycle (TCA cycle)+ko00380//Tryptophan metabolism+ko01100//Metabolic pathways+ko01110//Biosynthesis of secondary metabolites+ko01200//Carbon metabolism;K00164//2-oxoglutarate dehydrogenase E1 component [EC:1.2.4.2]+ko00310//Lysine degradation+ko00020//Citrate cycle (TCA cycle)+ko00380//Trypt…	Dehydrogenase E1 component		PREDICTED: 2-oxoglutarate dehydrogenase, mitochondrial-like, partial [Populus euphratica]	[G] KOG0450 2-oxoglutarate dehydrogenase, E1 subunit		GO:0006099//tricarboxylic acid cycle;GO:0004591//oxoglutarate dehydrogenase (succinyl-transferring) activity;GO:0030976//thiamine pyrophosphate binding
CL8852.Contig1_All	1734	ko01210//2-Oxocarboxylic acid metabolism;ko01110//Biosynthesis of secondary metabolites;ko00630//Glyoxylate and dicarboxylate metabolism;ko00020//Citrate cycle (TCA cycle);ko01100//Metabolic pathways;ko01230//Biosynthesis of amino acids;ko01200//Carbon metabolism	Metabolism	Global and overview maps;Carbohydrate metabolism	-4.73762	1.42328e-120	1.01249e-121	K01647//citrate synthase [EC:2.3.3.1]+ko00020//Citrate cycle (TCA cycle)+ko01230//Biosynthesis of amino acids+ko01100//Metabolic pathways+ko01110//Biosynthesis of secondary metabolites+ko01210//2-Oxocarboxylic acid metabolism+ko01200//Carbon metabolism+ko00630//Glyoxylate and dicarboxylate metabolism;K01647//citrate synthase [EC:2.3.3.1]+ko00020//Citrate cycle (TCA cycle)+ko01230//Biosynthesis of…	Citrate synthase, C-terminal domain		citrate synthase I [Ostreococcus tauri]	[C] KOG2617 Citrate synthase	Citrate synthase 3, peroxisomal OS=Arabidopsis thaliana GN=CSY3 PE=2 SV=1	GO:0006099//tricarboxylic acid cycle;GO:0004108//citrate (Si)-synthase activity;GO:0005737//cytoplasm
CL7257.Contig1_All	2468	ko00710//Carbon fixation in photosynthetic organisms;ko01100//Metabolic pathways;ko01200//Carbon metabolism;ko00620//Pyruvate metabolism;ko00020//Citrate cycle (TCA cycle);ko00010//Glycolysis / Gluconeogenesis;ko01110//Biosynthesis of secondary metabolites	Metabolism	Global and overview maps;Carbohydrate metabolism;Energy metabolism	-4.83422	1.21075e-260	4.70462e-262	K01610//phosphoenolpyruvate carboxykinase (ATP) [EC:4.1.1.49]+ko00010//Glycolysis / Gluconeogenesis+ko00020//Citrate cycle (TCA cycle)+ko01100//Metabolic pathways+ko01110//Biosynthesis of secondary metabolites+ko00710//Carbon fixation in photosynthetic organisms+ko00620//Pyruvate metabolism+ko01200//Carbon metabolism;K01610//phosphoenolpyruvate carboxykinase (ATP) [EC:4.1.1.49]+ko00010//Glycolysi…	Phosphoenolpyruvate carboxykinase		phosphoenolpyruvate carboxykinase [Nannochloropsis gaditana]	[C] TWOG0797 Phosphoenolpyruvate carboxykinase (ATP)	Phosphoenolpyruvate carboxykinase (ATP) OS=Zea mays PE=2 SV=1	GO:0005524//ATP binding;GO:0006094//gluconeogenesis;GO:0016301//kinase activity;GO:0005829//cytosol;GO:0004612//phosphoenolpyruvate carboxykinase (ATP) activity
Unigene28129_All	558	ko01210//2-Oxocarboxylic acid metabolism;ko01230//Biosynthesis of amino acids;ko01100//Metabolic pathways;ko00020//Citrate cycle (TCA cycle);ko00630//Glyoxylate and dicarboxylate metabolism;ko01110//Biosynthesis of secondary metabolites;ko01200//Carbon metabolism	Metabolism	Global and overview maps;Carbohydrate metabolism	-4.84176	0.000167012	0.00011332	K01681//aconitate hydratase [EC:4.2.1.3]+ko00020//Citrate cycle (TCA cycle)+ko01230//Biosynthesis of amino acids+ko01100//Metabolic pathways+ko01110//Biosynthesis of secondary metabolites+ko01210//2-Oxocarboxylic acid metabolism+ko01200//Carbon metabolism+ko00630//Glyoxylate and dicarboxylate metabolism	Aconitase family (aconitate hydratase)		putative aconitate hydratase, cytoplasmic [Chenopodium quinoa]	[AJ] KOG0452 RNA-binding translational regulator IRP (aconitase superfamily)	Aconitate hydratase, cytoplasmic (Fragment) OS=Solanum tuberosum PE=2 SV=1
Unigene68040_All	502	ko00280//Valine, leucine and isoleucine degradation;ko00630//Glyoxylate and dicarboxylate metabolism;ko01110//Biosynthesis of secondary metabolites;ko00020//Citrate cycle (TCA cycle);ko00640//Propanoate metabolism;ko00010//Glycolysis / Gluconeogenesis;ko00260//Glycine, serine and threonine metabolism;ko01200//Carbon metabolism;ko01100//Metabolic pathways;ko00620//Pyruvate metabolism	Metabolism	Amino acid metabolism;Global and overview maps;Carbohydrate metabolism	-4.84176	0.000167012	0.00011332	K00382//dihydrolipoamide dehydrogenase [EC:1.8.1.4]+ko00010//Glycolysis / Gluconeogenesis+ko00020//Citrate cycle (TCA cycle)+ko00280//Valine, leucine and isoleucine degradation+ko00640//Propanoate metabolism+ko01100//Metabolic pathways+ko01110//Biosynthesis of secondary metabolites+ko00260//Glycine, serine and threonine metabolism+ko00620//Pyruvate metabolism+ko01200//Carbon metabolism+ko00630//G…	Pyridine nucleotide-disulphide oxidoreductase, dimerisation domain		dihydrolipoyl dehydrogenase [Chlamydomonas reinhardtii] >EDP01871.1 dihydrolipoyl dehydrogenase [Chlamydomonas reinhardtii]	[C] KOG1335 Dihydrolipoamide dehydrogenase	Dihydrolipoyl dehydrogenase 2, mitochondrial OS=Arabidopsis thaliana GN=LPD2 PE=1 SV=1	GO:0009055//electron transfer activity;GO:0004148//dihydrolipoyl dehydrogenase activity;GO:0005623//cell;GO:0050660//flavin adenine dinucleotide binding;GO:0045454//cell redox homeostasis
Unigene69768_All	753	ko01200//Carbon metabolism;ko00310//Lysine degradation;ko01110//Biosynthesis of secondary metabolites;ko01100//Metabolic pathways;ko00020//Citrate cycle (TCA cycle)	Metabolism	Global and overview maps;Amino acid metabolism;Carbohydrate metabolism	-4.84176	0.000167012	0.00011332	K00658//2-oxoglutarate dehydrogenase E2 component (dihydrolipoamide succinyltransferase) [EC:2.3.1.61]+ko00310//Lysine degradation+ko00020//Citrate cycle (TCA cycle)+ko01100//Metabolic pathways+ko01110//Biosynthesis of secondary metabolites+ko01200//Carbon metabolism;K00658//2-oxoglutarate dehydrogenase E2 component (dihydrolipoamide succinyltransferase) [EC:2.3.1.61]+ko00310//Lysine degradation+…	2-oxoacid dehydrogenases acyltransferase (catalytic domain)	XM_001692487.1 Chlamydomonas reinhardtii dihydrolipoamide succinyltransferase, oxoglutarate dehydrogenase E2 component (OGD2), mRNA	unknown [Picea sitchensis]	[C] KOG0559 Dihydrolipoamide succinyltransferase (2-oxoglutarate dehydrogenase, E2 subunit)	Dihydrolipoyllysine-residue succinyltransferase component of 2-oxoglutarate dehydrogenase complex 2, mitochondrial OS=Arabidopsis thaliana GN=At4g26910 PE=1 SV=2
Unigene70176_All	482	ko00260//Glycine, serine and threonine metabolism;ko01200//Carbon metabolism;ko01110//Biosynthesis of secondary metabolites;ko00630//Glyoxylate and dicarboxylate metabolism;ko00280//Valine, leucine and isoleucine degradation;ko00010//Glycolysis / Gluconeogenesis;ko00640//Propanoate metabolism;ko01100//Metabolic pathways;ko00620//Pyruvate metabolism;ko00020//Citrate cycle (TCA cycle)	Metabolism	Global and overview maps;Amino acid metabolism;Carbohydrate metabolism	-4.84176	0.000167012	0.00011332	K00382//dihydrolipoamide dehydrogenase [EC:1.8.1.4]+ko00010//Glycolysis / Gluconeogenesis+ko00020//Citrate cycle (TCA cycle)+ko00280//Valine, leucine and isoleucine degradation+ko00640//Propanoate metabolism+ko01100//Metabolic pathways+ko01110//Biosynthesis of secondary metabolites+ko00260//Glycine, serine and threonine metabolism+ko00620//Pyruvate metabolism+ko01200//Carbon metabolism+ko00630//G…	Pyridine nucleotide-disulphide oxidoreductase		predicted protein [Hordeum vulgare subsp. vulgare]	[C] KOG1335 Dihydrolipoamide dehydrogenase	Leghemoglobin reductase OS=Vigna unguiculata GN=FLBR PE=1 SV=1	GO:0009055//electron transfer activity;GO:0004148//dihydrolipoyl dehydrogenase activity;GO:0005623//cell;GO:0050660//flavin adenine dinucleotide binding;GO:0045454//cell redox homeostasis
Unigene73253_All	364	ko00020//Citrate cycle (TCA cycle);ko00270//Cysteine and methionine metabolism;ko01100//Metabolic pathways;ko01200//Carbon metabolism;ko00710//Carbon fixation in photosynthetic organisms;ko00640//Propanoate metabolism;ko00620//Pyruvate metabolism;ko01110//Biosynthesis of secondary metabolites;ko00630//Glyoxylate and dicarboxylate metabolism;ko00010//Glycolysis / Gluconeogenesis	Metabolism	Carbohydrate metabolism;Global and overview maps;Amino acid metabolism;Energy metabolism	-4.84176	0.000167012	0.00011332	K00016//L-lactate dehydrogenase [EC:1.1.1.27]+ko00010//Glycolysis / Gluconeogenesis+ko00640//Propanoate metabolism+ko01100//Metabolic pathways+ko01110//Biosynthesis of secondary metabolites+ko00620//Pyruvate metabolism+ko00270//Cysteine and methionine metabolism;K00016//L-lactate dehydrogenase [EC:1.1.1.27]+ko00010//Glycolysis / Gluconeogenesis+ko00640//Propanoate metabolism+ko01100//Metabolic pa…	lactate/malate dehydrogenase, NAD binding domain		RecName: Full=L-lactate dehydrogenase; Short=LDH >AAB38970.1 malate dehydrogenase [Botryococcus braunii]	[C] KOG1494 NAD-dependent malate dehydrogenase	L-lactate dehydrogenase OS=Botryococcus braunii PE=1 SV=1	GO:0019752//carboxylic acid metabolic process;GO:0005975//carbohydrate metabolic process;GO:0004459//L-lactate dehydrogenase activity;GO:0005737//cytoplasm
CL4597.Contig3_All	1195	ko00270//Cysteine and methionine metabolism;ko00020//Citrate cycle (TCA cycle);ko01100//Metabolic pathways;ko01110//Biosynthesis of secondary metabolites;ko00620//Pyruvate metabolism;ko00710//Carbon fixation in photosynthetic organisms;ko00630//Glyoxylate and dicarboxylate metabolism;ko01200//Carbon metabolism	Metabolism	Amino acid metabolism;Global and overview maps;Energy metabolism;Carbohydrate metabolism	-4.90114	2.06567e-131	1.39012e-132	K00026//malate dehydrogenase [EC:1.1.1.37]+ko00020//Citrate cycle (TCA cycle)+ko01100//Metabolic pathways+ko01110//Biosynthesis of secondary metabolites+ko00710//Carbon fixation in photosynthetic organisms+ko00620//Pyruvate metabolism+ko00270//Cysteine and methionine metabolism+ko01200//Carbon metabolism+ko00630//Glyoxylate and dicarboxylate metabolism;K00026//malate dehydrogenase [EC:1.1.1.37]+k…	lactate/malate dehydrogenase, alpha/beta C-terminal domain		malate dehydrogenase [Sargassum thunbergii]	[C] KOG1494 NAD-dependent malate dehydrogenase	Malate dehydrogenase, chloroplastic OS=Arabidopsis thaliana GN=At3g47520 PE=1 SV=1
CL5667.Contig3_All	528	ko01200//Carbon metabolism;ko01100//Metabolic pathways;ko00190//Oxidative phosphorylation;ko00020//Citrate cycle (TCA cycle);ko01110//Biosynthesis of secondary metabolites	Metabolism	Energy metabolism;Carbohydrate metabolism;Global and overview maps	-4.9413	9.37088e-05	6.12248e-05	K00234//succinate dehydrogenase (ubiquinone) flavoprotein subunit [EC:1.3.5.1]+ko00020//Citrate cycle (TCA cycle)+ko01100//Metabolic pathways+ko00190//Oxidative phosphorylation+ko01110//Biosynthesis of secondary metabolites+ko01200//Carbon metabolism;K00234//succinate dehydrogenase (ubiquinone) flavoprotein subunit [EC:1.3.5.1]+ko00020//Citrate cycle (TCA cycle)+ko01100//Metabolic pathways+ko0019…	FAD binding domain		hypothetical protein GUITHDRAFT_159138 [Guillardia theta CCMP2712] >EKX54553.1 hypothetical protein GUITHDRAFT_159138 [Guillardia theta CCMP2712]	[C] KOG2403 Succinate dehydrogenase, flavoprotein subunit	Succinate dehydrogenase [ubiquinone] flavoprotein subunit, mitochondrial OS=Oryza sativa subsp. japonica GN=SDH1 PE=1 SV=1	GO:0009055//electron transfer activity;GO:0006121//mitochondrial electron transport, succinate to ubiquinone;GO:0050660//flavin adenine dinucleotide binding;GO:0006099//tricarboxylic acid cycle;GO:0005749//mitochondrial respiratory chain complex II, succinate dehydrogenase complex (ubiquinone);GO:0000104//succinate dehydrogenase activity;GO:0022900//electron transport chain;GO:0005743//mitochondr…
Unigene43754_All	485	ko01200//Carbon metabolism;ko01100//Metabolic pathways;ko01110//Biosynthesis of secondary metabolites;ko00020//Citrate cycle (TCA cycle);ko00310//Lysine degradation	Metabolism	Global and overview maps;Carbohydrate metabolism;Amino acid metabolism	-4.9413	9.37088e-05	6.12248e-05	K00658//2-oxoglutarate dehydrogenase E2 component (dihydrolipoamide succinyltransferase) [EC:2.3.1.61]+ko00310//Lysine degradation+ko00020//Citrate cycle (TCA cycle)+ko01100//Metabolic pathways+ko01110//Biosynthesis of secondary metabolites+ko01200//Carbon metabolism;K00658//2-oxoglutarate dehydrogenase E2 component (dihydrolipoamide succinyltransferase) [EC:2.3.1.61]+ko00310//Lysine degradation+…	Biotin-requiring enzyme		dihydrolipoamide succinyltransferase component of 2-oxoglutarate dehydrogenase, putative, partial [Ricinus communis]	[C] KOG0559 Dihydrolipoamide succinyltransferase (2-oxoglutarate dehydrogenase, E2 subunit)	Dihydrolipoyllysine-residue succinyltransferase component of 2-oxoglutarate dehydrogenase complex 1, mitochondrial OS=Arabidopsis thaliana GN=At5g55070 PE=1 SV=1
Unigene64005_All	423	ko00010//Glycolysis / Gluconeogenesis;ko00710//Carbon fixation in photosynthetic organisms;ko01110//Biosynthesis of secondary metabolites;ko01200//Carbon metabolism;ko00620//Pyruvate metabolism;ko00020//Citrate cycle (TCA cycle);ko01100//Metabolic pathways	Metabolism	Carbohydrate metabolism;Energy metabolism;Global and overview maps	-4.9413	9.37088e-05	6.12248e-05	K01610//phosphoenolpyruvate carboxykinase (ATP) [EC:4.1.1.49]+ko00010//Glycolysis / Gluconeogenesis+ko00020//Citrate cycle (TCA cycle)+ko01100//Metabolic pathways+ko01110//Biosynthesis of secondary metabolites+ko00710//Carbon fixation in photosynthetic organisms+ko00620//Pyruvate metabolism+ko01200//Carbon metabolism;K01610//phosphoenolpyruvate carboxykinase (ATP) [EC:4.1.1.49]+ko00010//Glycolysi…	Phosphoenolpyruvate carboxykinase		phosphoenolpyruvate carboxykinase [ATP] [Saprolegnia diclina VS20] >EQC38163.1 phosphoenolpyruvate carboxykinase [ATP] [Saprolegnia diclina VS20]		Phosphoenolpyruvate carboxykinase (ATP) 1 OS=Urochloa panicoides GN=PCK1 PE=1 SV=1	GO:0005524//ATP binding;GO:0006094//gluconeogenesis;GO:0016301//kinase activity;GO:0004612//phosphoenolpyruvate carboxykinase (ATP) activity
Unigene68646_All	523	ko01200//Carbon metabolism;ko04146//Peroxisome;ko01100//Metabolic pathways;ko00480//Glutathione metabolism;ko01230//Biosynthesis of amino acids;ko00020//Citrate cycle (TCA cycle);ko01110//Biosynthesis of secondary metabolites;ko01210//2-Oxocarboxylic acid metabolism	Cellular Processes;Metabolism	Carbohydrate metabolism;Transport and catabolism;Metabolism of other amino acids;Global and overview maps	-4.9413	9.37088e-05	6.12248e-05	K00031//isocitrate dehydrogenase [EC:1.1.1.42]+ko04146//Peroxisome+ko00020//Citrate cycle (TCA cycle)+ko01230//Biosynthesis of amino acids+ko01100//Metabolic pathways+ko01110//Biosynthesis of secondary metabolites+ko01210//2-Oxocarboxylic acid metabolism+ko01200//Carbon metabolism+ko00480//Glutathione metabolism;K00031//isocitrate dehydrogenase [EC:1.1.1.42]+ko04146//Peroxisome+ko00020//Citrate c…	Isocitrate/isopropylmalate dehydrogenase	XM_008898243.1 Phytophthora parasitica INRA-310 isocitrate dehydrogenase, NADP-dependent mRNA	cytosolic isocitrate dehydrogenase [NADP] [Phalaenopsis equestris]	[C] KOG1526 NADP-dependent isocitrate dehydrogenase	Isocitrate dehydrogenase [NADP] OS=Glycine max GN=IDH1 PE=2 SV=2	GO:0006099//tricarboxylic acid cycle;GO:0000287//magnesium ion binding;GO:0004450//isocitrate dehydrogenase (NADP+) activity;GO:0006102//isocitrate metabolic process;GO:0051287//NAD binding
Unigene63163_All	648	ko01100//Metabolic pathways;ko00710//Carbon fixation in photosynthetic organisms;ko01110//Biosynthesis of secondary metabolites;ko00010//Glycolysis / Gluconeogenesis;ko00620//Pyruvate metabolism;ko00020//Citrate cycle (TCA cycle);ko01200//Carbon metabolism	Metabolism	Global and overview maps;Energy metabolism;Carbohydrate metabolism	-5.0344	9.99387e-09	4.38523e-09	K01610//phosphoenolpyruvate carboxykinase (ATP) [EC:4.1.1.49]+ko00010//Glycolysis / Gluconeogenesis+ko00020//Citrate cycle (TCA cycle)+ko01100//Metabolic pathways+ko01110//Biosynthesis of secondary metabolites+ko00710//Carbon fixation in photosynthetic organisms+ko00620//Pyruvate metabolism+ko01200//Carbon metabolism;K01610//phosphoenolpyruvate carboxykinase (ATP) [EC:4.1.1.49]+ko00010//Glycolysi…	Phosphoenolpyruvate carboxykinase		phosphoenolpyruvate carboxykinase (ATP) [Aphanomyces astaci] >ETV79595.1 phosphoenolpyruvate carboxykinase (ATP) [Aphanomyces astaci]	[C] TWOG0797 Phosphoenolpyruvate carboxykinase (ATP)	Phosphoenolpyruvate carboxykinase (ATP) 2 OS=Urochloa panicoides GN=PCK2 PE=2 SV=1	GO:0005524//ATP binding;GO:0006094//gluconeogenesis;GO:0016301//kinase activity;GO:0004612//phosphoenolpyruvate carboxykinase (ATP) activity
Unigene88314_All	657	ko00260//Glycine, serine and threonine metabolism;ko01100//Metabolic pathways;ko00010//Glycolysis / Gluconeogenesis;ko01110//Biosynthesis of secondary metabolites;ko00280//Valine, leucine and isoleucine degradation;ko01200//Carbon metabolism;ko00020//Citrate cycle (TCA cycle);ko00630//Glyoxylate and dicarboxylate metabolism;ko00620//Pyruvate metabolism;ko00640//Propanoate metabolism	Metabolism	Carbohydrate metabolism;Amino acid metabolism;Global and overview maps	-5.0344	5.26998e-05	3.32497e-05	K00382//dihydrolipoamide dehydrogenase [EC:1.8.1.4]+ko00010//Glycolysis / Gluconeogenesis+ko00020//Citrate cycle (TCA cycle)+ko00280//Valine, leucine and isoleucine degradation+ko00640//Propanoate metabolism+ko01100//Metabolic pathways+ko01110//Biosynthesis of secondary metabolites+ko00260//Glycine, serine and threonine metabolism+ko00620//Pyruvate metabolism+ko01200//Carbon metabolism+ko00630//G…	Pyridine nucleotide-disulphide oxidoreductase	XM_009038789.1 Aureococcus anophagefferens hypothetical protein partial mRNA	dihydrolipoyl dehydrogenase [Nannochloropsis gaditana]	[C] KOG1335 Dihydrolipoamide dehydrogenase	Dihydrolipoyl dehydrogenase 1, mitochondrial OS=Arabidopsis thaliana GN=LPD1 PE=1 SV=2	GO:0009055//electron transfer activity;GO:0004148//dihydrolipoyl dehydrogenase activity;GO:0005623//cell;GO:0050660//flavin adenine dinucleotide binding;GO:0045454//cell redox homeostasis
Unigene17866_All	778	ko01210//2-Oxocarboxylic acid metabolism;ko01110//Biosynthesis of secondary metabolites;ko01100//Metabolic pathways;ko01200//Carbon metabolism;ko00020//Citrate cycle (TCA cycle);ko01230//Biosynthesis of amino acids;ko00640//Propanoate metabolism;ko00630//Glyoxylate and dicarboxylate metabolism	Metabolism	Global and overview maps;Carbohydrate metabolism	-5.0788	5.61589e-09	2.42483e-09	K01682//aconitate hydratase 2 / 2-methylisocitrate dehydratase [EC:4.2.1.3 4.2.1.99]+ko00020//Citrate cycle (TCA cycle)+ko01230//Biosynthesis of amino acids+ko00640//Propanoate metabolism+ko01100//Metabolic pathways+ko01110//Biosynthesis of secondary metabolites+ko01210//2-Oxocarboxylic acid metabolism+ko01200//Carbon metabolism+ko00630//Glyoxylate and dicarboxylate metabolism	Aconitate B N-terminal domain		aconitate hydratase 2 / 2-methylisocitrate dehydratase [Fistulifera solaris]			GO:0006099//tricarboxylic acid cycle;GO:0003994//aconitate hydratase activity;GO:0005829//cytosol;GO:0051539//4 iron, 4 sulfur cluster binding
Unigene86006_All	649	ko01100//Metabolic pathways;ko01110//Biosynthesis of secondary metabolites;ko00020//Citrate cycle (TCA cycle);ko01200//Carbon metabolism;ko00190//Oxidative phosphorylation	Metabolism	Energy metabolism;Global and overview maps;Carbohydrate metabolism	-5.28233	9.50308e-06	5.48026e-06	K00234//succinate dehydrogenase (ubiquinone) flavoprotein subunit [EC:1.3.5.1]+ko00020//Citrate cycle (TCA cycle)+ko01100//Metabolic pathways+ko00190//Oxidative phosphorylation+ko01110//Biosynthesis of secondary metabolites+ko01200//Carbon metabolism;K00234//succinate dehydrogenase (ubiquinone) flavoprotein subunit [EC:1.3.5.1]+ko00020//Citrate cycle (TCA cycle)+ko01100//Metabolic pathways+ko0019…	FAD binding domain	XM_009040194.1 Aureococcus anophagefferens hypothetical protein mRNA	succinate dehydrogenase flavoprotein [Phaeodactylum tricornutum CCAP 1055/1] >ACI65968.1 succinate dehydrogenase flavoprotein [Phaeodactylum tricornutum CCAP 1055/1]	[C] KOG2403 Succinate dehydrogenase, flavoprotein subunit	Succinate dehydrogenase [ubiquinone] flavoprotein subunit 2, mitochondrial OS=Arabidopsis thaliana GN=SDH1-2 PE=1 SV=1	GO:0009055//electron transfer activity;GO:0006121//mitochondrial electron transport, succinate to ubiquinone;GO:0050660//flavin adenine dinucleotide binding;GO:0006099//tricarboxylic acid cycle;GO:0022900//electron transport chain;GO:0005749//mitochondrial respiratory chain complex II, succinate dehydrogenase complex (ubiquinone);GO:0000104//succinate dehydrogenase activity;GO:0005743//mitochondr…
Unigene86249_All	736	ko00630//Glyoxylate and dicarboxylate metabolism;ko01200//Carbon metabolism;ko00710//Carbon fixation in photosynthetic organisms;ko01100//Metabolic pathways;ko00270//Cysteine and methionine metabolism;ko01110//Biosynthesis of secondary metabolites;ko00020//Citrate cycle (TCA cycle);ko00620//Pyruvate metabolism	Metabolism	Global and overview maps;Energy metabolism;Carbohydrate metabolism;Amino acid metabolism	-5.28233	9.50308e-06	5.48026e-06	K00026//malate dehydrogenase [EC:1.1.1.37]+ko00020//Citrate cycle (TCA cycle)+ko01100//Metabolic pathways+ko01110//Biosynthesis of secondary metabolites+ko00710//Carbon fixation in photosynthetic organisms+ko00620//Pyruvate metabolism+ko00270//Cysteine and methionine metabolism+ko01200//Carbon metabolism+ko00630//Glyoxylate and dicarboxylate metabolism;K00026//malate dehydrogenase [EC:1.1.1.37]+k…	lactate/malate dehydrogenase, alpha/beta C-terminal domain	XM_002899764.1 Phytophthora infestans T30-4 malate dehydrogenase, mitochondrial precursor (PITG_13614) mRNA, complete cds	malate dehydrogenase, NAD-dependent [Phytophthora parasitica INRA-310] >ETI48434.1 malate dehydrogenase, NAD-dependent [Phytophthora parasitica P1569] >ETK88374.1 malate dehydrogenase, NAD-dependent [Phytophthora parasitica] >ETL41790.1 malate dehydrogenase, NAD-dependent [Phytophthora parasitica] >ETL94929.1 malate dehydrogenase, NAD-dependent [Phytophthora parasitica] >ETM48184.1 malate dehydro…	[C] KOG1494 NAD-dependent malate dehydrogenase	Malate dehydrogenase, glyoxysomal OS=Glycine max PE=2 SV=2	GO:0006099//tricarboxylic acid cycle;GO:0005975//carbohydrate metabolic process;GO:0030060//L-malate dehydrogenase activity;GO:0006108//malate metabolic process
Unigene59316_All	513	ko01230//Biosynthesis of amino acids;ko00020//Citrate cycle (TCA cycle);ko01100//Metabolic pathways;ko01200//Carbon metabolism;ko00620//Pyruvate metabolism	Metabolism	Carbohydrate metabolism;Global and overview maps	-5.42672	3.07878e-06	1.6839e-06	K01958//pyruvate carboxylase [EC:6.4.1.1]+ko00020//Citrate cycle (TCA cycle)+ko01230//Biosynthesis of amino acids+ko01100//Metabolic pathways+ko00620//Pyruvate metabolism+ko01200//Carbon metabolism;K01958//pyruvate carboxylase [EC:6.4.1.1]+ko00020//Citrate cycle (TCA cycle)+ko01230//Biosynthesis of amino acids+ko01100//Metabolic pathways+ko00620//Pyruvate metabolism+ko01200//Carbon metabolism;K01…	Biotin-requiring enzyme		pyruvate carboxylase [Saccharina japonica]	[C] KOG0369 Pyruvate carboxylase
CL37.Contig2_All	1161	ko01110//Biosynthesis of secondary metabolites;ko00020//Citrate cycle (TCA cycle);ko01100//Metabolic pathways;ko00010//Glycolysis / Gluconeogenesis;ko00620//Pyruvate metabolism;ko01200//Carbon metabolism	Metabolism	Carbohydrate metabolism;Global and overview maps	-5.4687	2.17921e-06	1.17186e-06	K00162//pyruvate dehydrogenase E1 component beta subunit [EC:1.2.4.1]+ko00010//Glycolysis / Gluconeogenesis+ko00020//Citrate cycle (TCA cycle)+ko01100//Metabolic pathways+ko01110//Biosynthesis of secondary metabolites+ko00620//Pyruvate metabolism+ko01200//Carbon metabolism;K00162//pyruvate dehydrogenase E1 component beta subunit [EC:1.2.4.1]+ko00010//Glycolysis / Gluconeogenesis+ko00020//Citrate …	Transketolase, C-terminal domain		pyruvate dehydrogenase E1 component beta subunit mitochondrial precursor [Ostreococcus tauri]	[C] KOG0524 Pyruvate dehydrogenase E1, beta subunit	Pyruvate dehydrogenase E1 component subunit beta-1, mitochondrial OS=Arabidopsis thaliana GN=PDH2 PE=1 SV=2	GO:0005759//mitochondrial matrix;GO:0006096//glycolytic process;GO:0004739//pyruvate dehydrogenase (acetyl-transferring) activity;GO:0006086//acetyl-CoA biosynthetic process from pyruvate
Unigene27899_All	819	ko01230//Biosynthesis of amino acids;ko01210//2-Oxocarboxylic acid metabolism;ko01110//Biosynthesis of secondary metabolites;ko00020//Citrate cycle (TCA cycle);ko01100//Metabolic pathways;ko01200//Carbon metabolism;ko00630//Glyoxylate and dicarboxylate metabolism	Metabolism	Carbohydrate metabolism;Global and overview maps	-5.49384	1.76295e-06	9.3908e-07	K01681//aconitate hydratase [EC:4.2.1.3]+ko00020//Citrate cycle (TCA cycle)+ko01230//Biosynthesis of amino acids+ko01100//Metabolic pathways+ko01110//Biosynthesis of secondary metabolites+ko01210//2-Oxocarboxylic acid metabolism+ko01200//Carbon metabolism+ko00630//Glyoxylate and dicarboxylate metabolism;K01681//aconitate hydratase [EC:4.2.1.3]+ko00020//Citrate cycle (TCA cycle)+ko01230//Biosynthe…	Aconitase family (aconitate hydratase)		aconitate hydratase, mitochondrial precursor [Thraustotheca clavata]	[CE] KOG0453 Aconitase/homoaconitase (aconitase superfamily)	Aconitate hydratase, mitochondrial OS=Gracilaria gracilis PE=3 SV=1	GO:0006099//tricarboxylic acid cycle;GO:0003994//aconitate hydratase activity;GO:0046872//metal ion binding;GO:0051539//4 iron, 4 sulfur cluster binding;GO:0005739//mitochondrion
Unigene62237_All	761	ko00260//Glycine, serine and threonine metabolism;ko00280//Valine, leucine and isoleucine degradation;ko00020//Citrate cycle (TCA cycle);ko00630//Glyoxylate and dicarboxylate metabolism;ko01110//Biosynthesis of secondary metabolites;ko00010//Glycolysis / Gluconeogenesis;ko00640//Propanoate metabolism;ko00620//Pyruvate metabolism;ko01200//Carbon metabolism;ko01100//Metabolic pathways	Metabolism	Global and overview maps;Carbohydrate metabolism;Amino acid metabolism	-5.49384	1.76295e-06	9.3908e-07	K00382//dihydrolipoamide dehydrogenase [EC:1.8.1.4]+ko00010//Glycolysis / Gluconeogenesis+ko00020//Citrate cycle (TCA cycle)+ko00280//Valine, leucine and isoleucine degradation+ko00640//Propanoate metabolism+ko01100//Metabolic pathways+ko01110//Biosynthesis of secondary metabolites+ko00260//Glycine, serine and threonine metabolism+ko00620//Pyruvate metabolism+ko01200//Carbon metabolism+ko00630//G…	Pyridine nucleotide-disulphide oxidoreductase		dihydrolipoamide dehydrogenase [Galdieria sulphuraria] >EME31272.1 dihydrolipoamide dehydrogenase [Galdieria sulphuraria]	[C] KOG1335 Dihydrolipoamide dehydrogenase	Leghemoglobin reductase OS=Vigna unguiculata GN=FLBR PE=1 SV=1	GO:0009055//electron transfer activity;GO:0004148//dihydrolipoyl dehydrogenase activity;GO:0005623//cell;GO:0050660//flavin adenine dinucleotide binding;GO:0045454//cell redox homeostasis
CL389.Contig3_All	2785	ko01200//Carbon metabolism;ko00020//Citrate cycle (TCA cycle);ko01210//2-Oxocarboxylic acid metabolism;ko01110//Biosynthesis of secondary metabolites;ko00630//Glyoxylate and dicarboxylate metabolism;ko01230//Biosynthesis of amino acids;ko01100//Metabolic pathways	Metabolism	Global and overview maps;Carbohydrate metabolism	-5.56859	3.23871e-23	7.4173e-24	K01681//aconitate hydratase [EC:4.2.1.3]+ko00020//Citrate cycle (TCA cycle)+ko01230//Biosynthesis of amino acids+ko01100//Metabolic pathways+ko01110//Biosynthesis of secondary metabolites+ko01210//2-Oxocarboxylic acid metabolism+ko01200//Carbon metabolism+ko00630//Glyoxylate and dicarboxylate metabolism;K01681//aconitate hydratase [EC:4.2.1.3]+ko00020//Citrate cycle (TCA cycle)+ko01230//Biosynthe…	Aconitase family (aconitate hydratase)		aconitate hydratase, cytoplasmic-like [Dorcoceras hygrometricum]	[AJ] KOG0452 RNA-binding translational regulator IRP (aconitase superfamily)	Aconitate hydratase 1 OS=Arabidopsis thaliana GN=ACO1 PE=1 SV=2
Unigene2991_All	671	ko01110//Biosynthesis of secondary metabolites;ko01200//Carbon metabolism;ko01100//Metabolic pathways;ko00310//Lysine degradation;ko00020//Citrate cycle (TCA cycle)	Metabolism	Global and overview maps;Amino acid metabolism;Carbohydrate metabolism	-5.78929	1.12117e-07	5.35211e-08	K00658//2-oxoglutarate dehydrogenase E2 component (dihydrolipoamide succinyltransferase) [EC:2.3.1.61]+ko00310//Lysine degradation+ko00020//Citrate cycle (TCA cycle)+ko01100//Metabolic pathways+ko01110//Biosynthesis of secondary metabolites+ko01200//Carbon metabolism;K00658//2-oxoglutarate dehydrogenase E2 component (dihydrolipoamide succinyltransferase) [EC:2.3.1.61]+ko00310//Lysine degradation+…	2-oxoacid dehydrogenases acyltransferase (catalytic domain)		hypothetical protein BU14_0523s0014 [Porphyra umbilicalis]	[C] KOG0559 Dihydrolipoamide succinyltransferase (2-oxoglutarate dehydrogenase, E2 subunit)	Dihydrolipoyllysine-residue succinyltransferase component of 2-oxoglutarate dehydrogenase complex 1, mitochondrial OS=Arabidopsis thaliana GN=At5g55070 PE=1 SV=1	GO:0006099//tricarboxylic acid cycle;GO:0045252//oxoglutarate dehydrogenase complex;GO:0004149//dihydrolipoyllysine-residue succinyltransferase activity
Unigene47271_All	906	ko01100//Metabolic pathways;ko01110//Biosynthesis of secondary metabolites;ko00310//Lysine degradation;ko01200//Carbon metabolism;ko00020//Citrate cycle (TCA cycle)	Metabolism	Amino acid metabolism;Global and overview maps;Carbohydrate metabolism	-5.84176	6.50864e-08	3.04863e-08	K00658//2-oxoglutarate dehydrogenase E2 component (dihydrolipoamide succinyltransferase) [EC:2.3.1.61]+ko00310//Lysine degradation+ko00020//Citrate cycle (TCA cycle)+ko01100//Metabolic pathways+ko01110//Biosynthesis of secondary metabolites+ko01200//Carbon metabolism;K00658//2-oxoglutarate dehydrogenase E2 component (dihydrolipoamide succinyltransferase) [EC:2.3.1.61]+ko00310//Lysine degradation+…	2-oxoacid dehydrogenases acyltransferase (catalytic domain)		PREDICTED: dihydrolipoyllysine-residue succinyltransferase component of 2-oxoglutarate dehydrogenase complex 2, mitochondrial-like isoform X3 [Musa acuminata subsp. malaccensis]	[C] KOG0559 Dihydrolipoamide succinyltransferase (2-oxoglutarate dehydrogenase, E2 subunit)	Dihydrolipoyllysine-residue acetyltransferase component 3 of pyruvate dehydrogenase complex, mitochondrial OS=Arabidopsis thaliana GN=At1g54220 PE=1 SV=1	GO:0006099//tricarboxylic acid cycle;GO:0045252//oxoglutarate dehydrogenase complex;GO:0004149//dihydrolipoyllysine-residue succinyltransferase activity
Unigene24100_All	888	ko01100//Metabolic pathways;ko00020//Citrate cycle (TCA cycle);ko01110//Biosynthesis of secondary metabolites;ko00380//Tryptophan metabolism;ko00310//Lysine degradation;ko01200//Carbon metabolism	Metabolism	Amino acid metabolism;Global and overview maps;Carbohydrate metabolism	-5.89239	3.7937e-08	1.74201e-08	K00164//2-oxoglutarate dehydrogenase E1 component [EC:1.2.4.2]+ko00310//Lysine degradation+ko00020//Citrate cycle (TCA cycle)+ko00380//Tryptophan metabolism+ko01100//Metabolic pathways+ko01110//Biosynthesis of secondary metabolites+ko01200//Carbon metabolism;K00164//2-oxoglutarate dehydrogenase E1 component [EC:1.2.4.2]+ko00310//Lysine degradation+ko00020//Citrate cycle (TCA cycle)+ko00380//Trypt…	Transketolase, pyrimidine binding domain		2-oxoglutarate dehydrogenase E1 component [Galdieria sulphuraria] >EME30416.1 2-oxoglutarate dehydrogenase E1 component [Galdieria sulphuraria]	[G] KOG0450 2-oxoglutarate dehydrogenase, E1 subunit		GO:0006099//tricarboxylic acid cycle;GO:0004591//oxoglutarate dehydrogenase (succinyl-transferring) activity;GO:0030976//thiamine pyrophosphate binding
Unigene72483_All	964	ko01110//Biosynthesis of secondary metabolites;ko00020//Citrate cycle (TCA cycle);ko01230//Biosynthesis of amino acids;ko01210//2-Oxocarboxylic acid metabolism;ko01100//Metabolic pathways;ko01200//Carbon metabolism	Metabolism	Global and overview maps;Carbohydrate metabolism	-5.89239	3.7937e-08	1.74201e-08	K00030//isocitrate dehydrogenase (NAD+) [EC:1.1.1.41]+ko00020//Citrate cycle (TCA cycle)+ko01230//Biosynthesis of amino acids+ko01100//Metabolic pathways+ko01110//Biosynthesis of secondary metabolites+ko01210//2-Oxocarboxylic acid metabolism+ko01200//Carbon metabolism;K00030//isocitrate dehydrogenase (NAD+) [EC:1.1.1.41]+ko00020//Citrate cycle (TCA cycle)+ko01230//Biosynthesis of amino acids+ko01…	Isocitrate/isopropylmalate dehydrogenase		hypothetical protein PAHAL_E03340 [Panicum hallii]	[E] KOG0785 Isocitrate dehydrogenase, alpha subunit	Isocitrate dehydrogenase [NAD] catalytic subunit 5, mitochondrial OS=Arabidopsis thaliana GN=IDH5 PE=1 SV=1	GO:0006099//tricarboxylic acid cycle;GO:0000287//magnesium ion binding;GO:0004449//isocitrate dehydrogenase (NAD+) activity;GO:0051287//NAD binding;GO:0005739//mitochondrion
Unigene86722_All	595	ko04146//Peroxisome;ko01200//Carbon metabolism;ko01230//Biosynthesis of amino acids;ko01110//Biosynthesis of secondary metabolites;ko01210//2-Oxocarboxylic acid metabolism;ko00020//Citrate cycle (TCA cycle);ko01100//Metabolic pathways;ko00480//Glutathione metabolism	Cellular Processes;Metabolism	Global and overview maps;Transport and catabolism;Carbohydrate metabolism;Metabolism of other amino acids	-6.0344	7.59615e-09	3.30899e-09	K00031//isocitrate dehydrogenase [EC:1.1.1.42]+ko04146//Peroxisome+ko00020//Citrate cycle (TCA cycle)+ko01230//Biosynthesis of amino acids+ko01100//Metabolic pathways+ko01110//Biosynthesis of secondary metabolites+ko01210//2-Oxocarboxylic acid metabolism+ko01200//Carbon metabolism+ko00480//Glutathione metabolism;K00031//isocitrate dehydrogenase [EC:1.1.1.42]+ko04146//Peroxisome+ko00020//Citrate c…	Isocitrate/isopropylmalate dehydrogenase	XM_012342980.1 Saprolegnia parasitica CBS 223.65 isocitrate dehydrogenase partial mRNA	Isocitrate dehydrogenase (NADP(+)) [Zostera marina]	[C] KOG1526 NADP-dependent isocitrate dehydrogenase	Isocitrate dehydrogenase [NADP] OS=Solanum tuberosum GN=ICDH-1 PE=2 SV=1	GO:0006099//tricarboxylic acid cycle;GO:0000287//magnesium ion binding;GO:0004450//isocitrate dehydrogenase (NADP+) activity;GO:0006102//isocitrate metabolic process;GO:0051287//NAD binding
Unigene58422_All	888	ko00020//Citrate cycle (TCA cycle);ko01230//Biosynthesis of amino acids;ko00620//Pyruvate metabolism;ko01100//Metabolic pathways;ko01200//Carbon metabolism	Metabolism	Global and overview maps;Carbohydrate metabolism	-6.46067	2.47424e-11	9.17529e-12	K01958//pyruvate carboxylase [EC:6.4.1.1]+ko00020//Citrate cycle (TCA cycle)+ko01230//Biosynthesis of amino acids+ko01100//Metabolic pathways+ko00620//Pyruvate metabolism+ko01200//Carbon metabolism;K01958//pyruvate carboxylase [EC:6.4.1.1]+ko00020//Citrate cycle (TCA cycle)+ko01230//Biosynthesis of amino acids+ko01100//Metabolic pathways+ko00620//Pyruvate metabolism+ko01200//Carbon metabolism;K01…	Conserved carboxylase domain		pyruvate carboxylase [Emiliania huxleyi CCMP1516] >EOD09666.1 pyruvate carboxylase [Emiliania huxleyi CCMP1516]	[C] KOG0369 Pyruvate carboxylase		GO:0004736//pyruvate carboxylase activity;GO:0046872//metal ion binding;GO:0004075//biotin carboxylase activity;GO:0006090//pyruvate metabolic process;GO:0005524//ATP binding;GO:0006094//gluconeogenesis;GO:0009374//biotin binding
Unigene87686_All	987	ko00190//Oxidative phosphorylation;ko01100//Metabolic pathways;ko01200//Carbon metabolism;ko01110//Biosynthesis of secondary metabolites;ko00020//Citrate cycle (TCA cycle)	Metabolism	Carbohydrate metabolism;Energy metabolism;Global and overview maps	-6.64911	1.20467e-12	4.14556e-13	K00235//succinate dehydrogenase (ubiquinone) iron-sulfur subunit [EC:1.3.5.1]+ko00020//Citrate cycle (TCA cycle)+ko01100//Metabolic pathways+ko00190//Oxidative phosphorylation+ko01110//Biosynthesis of secondary metabolites+ko01200//Carbon metabolism;K00235//succinate dehydrogenase (ubiquinone) iron-sulfur subunit [EC:1.3.5.1]+ko00020//Citrate cycle (TCA cycle)+ko01100//Metabolic pathways+ko00190/…	2Fe-2S iron-sulfur cluster binding domain	XM_020232587.1 PREDICTED: Ananas comosus succinate dehydrogenase [ubiquinone] iron-sulfur subunit 1, mitochondrial-like (LOC109710134), mRNA	succinate dehydrogenase iron-sulfur subunit [Saprolegnia parasitica CBS 223.65] >KDO20453.1 succinate dehydrogenase iron-sulfur subunit [Saprolegnia parasitica CBS 223.65]	[C] KOG3049 Succinate dehydrogenase, Fe-S protein subunit	Succinate dehydrogenase [ubiquinone] iron-sulfur subunit 1, mitochondrial OS=Arabidopsis thaliana GN=SDH2-1 PE=1 SV=2	GO:0009055//electron transfer activity;GO:0051537//2 iron, 2 sulfur cluster binding;GO:0006099//tricarboxylic acid cycle;GO:0046872//metal ion binding;GO:0005743//mitochondrial inner membrane;GO:0051539//4 iron, 4 sulfur cluster binding;GO:0008177//succinate dehydrogenase (ubiquinone) activity;GO:0051538//3 iron, 4 sulfur cluster binding
CL1872.Contig3_All	802	ko01210//2-Oxocarboxylic acid metabolism;ko01110//Biosynthesis of secondary metabolites;ko01200//Carbon metabolism;ko01100//Metabolic pathways;ko00020//Citrate cycle (TCA cycle);ko04146//Peroxisome;ko00480//Glutathione metabolism;ko01230//Biosynthesis of amino acids	Metabolism;Cellular Processes	Carbohydrate metabolism;Global and overview maps;Metabolism of other amino acids;Transport and catabolism	-6.67826	7.31448e-13	2.49119e-13	K00031//isocitrate dehydrogenase [EC:1.1.1.42]+ko04146//Peroxisome+ko00020//Citrate cycle (TCA cycle)+ko01230//Biosynthesis of amino acids+ko01100//Metabolic pathways+ko01110//Biosynthesis of secondary metabolites+ko01210//2-Oxocarboxylic acid metabolism+ko01200//Carbon metabolism+ko00480//Glutathione metabolism;K00031//isocitrate dehydrogenase [EC:1.1.1.42]+ko04146//Peroxisome+ko00020//Citrate c…	Isocitrate/isopropylmalate dehydrogenase	XM_009530655.1 Phytophthora sojae hypothetical protein partial mRNA	isocitrate/isopropylmalate dehydrogenase [Helicosporidium sp. ATCC 50920]	[C] KOG1526 NADP-dependent isocitrate dehydrogenase	Cytosolic isocitrate dehydrogenase [NADP] OS=Arabidopsis thaliana GN=CICDH PE=2 SV=1	GO:0006099//tricarboxylic acid cycle;GO:0000287//magnesium ion binding;GO:0004450//isocitrate dehydrogenase (NADP+) activity;GO:0006102//isocitrate metabolic process;GO:0051287//NAD binding
Unigene39268_All	1190	ko00020//Citrate cycle (TCA cycle);ko01200//Carbon metabolism;ko00190//Oxidative phosphorylation;ko01110//Biosynthesis of secondary metabolites;ko01100//Metabolic pathways	Metabolism	Global and overview maps;Energy metabolism;Carbohydrate metabolism	-6.70683	4.45103e-13	1.49983e-13	K00234//succinate dehydrogenase (ubiquinone) flavoprotein subunit [EC:1.3.5.1]+ko00020//Citrate cycle (TCA cycle)+ko01100//Metabolic pathways+ko00190//Oxidative phosphorylation+ko01110//Biosynthesis of secondary metabolites+ko01200//Carbon metabolism;K00234//succinate dehydrogenase (ubiquinone) flavoprotein subunit [EC:1.3.5.1]+ko00020//Citrate cycle (TCA cycle)+ko01100//Metabolic pathways+ko0019…	FAD binding domain		hypothetical protein OsI_32585 [Oryza sativa Indica Group]	[C] KOG2403 Succinate dehydrogenase, flavoprotein subunit	Succinate dehydrogenase [ubiquinone] flavoprotein subunit 1, mitochondrial OS=Arabidopsis thaliana GN=SDH1-1 PE=1 SV=1	GO:0006099//tricarboxylic acid cycle;GO:0022900//electron transport chain;GO:0050660//flavin adenine dinucleotide binding;GO:0005743//mitochondrial inner membrane;GO:0008177//succinate dehydrogenase (ubiquinone) activity
Unigene64335_All	2035	ko00020//Citrate cycle (TCA cycle);ko01200//Carbon metabolism;ko01230//Biosynthesis of amino acids;ko00620//Pyruvate metabolism;ko01100//Metabolic pathways	Metabolism	Global and overview maps;Carbohydrate metabolism	-6.85458	3.07224e-27	6.35078e-28	K01958//pyruvate carboxylase [EC:6.4.1.1]+ko00020//Citrate cycle (TCA cycle)+ko01230//Biosynthesis of amino acids+ko01100//Metabolic pathways+ko00620//Pyruvate metabolism+ko01200//Carbon metabolism;K01958//pyruvate carboxylase [EC:6.4.1.1]+ko00020//Citrate cycle (TCA cycle)+ko01230//Biosynthesis of amino acids+ko01100//Metabolic pathways+ko00620//Pyruvate metabolism+ko01200//Carbon metabolism;K01…	Carbamoyl-phosphate synthase L chain, ATP binding domain	JX612965.1 Gossypium hirsutum clone NBRI_GE55724 microsatellite sequence	pyruvate carboxylase [Volvox carteri f. nagariensis] >EFJ53086.1 pyruvate carboxylase [Volvox carteri f. nagariensis]	[C] KOG0369 Pyruvate carboxylase	Biotin carboxylase, chloroplastic OS=Arabidopsis thaliana GN=CAC2 PE=1 SV=1	GO:0004736//pyruvate carboxylase activity;GO:0046872//metal ion binding;GO:0004075//biotin carboxylase activity;GO:0006090//pyruvate metabolic process;GO:0005524//ATP binding;GO:0006094//gluconeogenesis;GO:0009374//biotin binding
Unigene8261_All	2751	ko01100//Metabolic pathways;ko00020//Citrate cycle (TCA cycle);ko01110//Biosynthesis of secondary metabolites	Metabolism	Global and overview maps;Carbohydrate metabolism	-6.88872	8.87005e-107	6.904e-108	K01648//ATP citrate (pro-S)-lyase [EC:2.3.3.8]+ko00020//Citrate cycle (TCA cycle)+ko01100//Metabolic pathways+ko01110//Biosynthesis of secondary metabolites;K01648//ATP citrate (pro-S)-lyase [EC:2.3.3.8]+ko00020//Citrate cycle (TCA cycle)+ko01100//Metabolic pathways+ko01110//Biosynthesis of secondary metabolites;K01648//ATP citrate (pro-S)-lyase [EC:2.3.3.8]+ko00020//Citrate cycle (TCA cycle)+ko0…	Citrate synthase, C-terminal domain	XM_008608685.1 Saprolegnia diclina VS20 ATP-citrate synthase mRNA	atp-citrate synthase [Phaeodactylum tricornutum CCAP 1055/1] >EEC48223.1 atp-citrate synthase [Phaeodactylum tricornutum CCAP 1055/1]	[C] KOG1254 ATP-citrate lyase	ATP-citrate synthase beta chain protein 2 OS=Arabidopsis thaliana GN=ACLB-2 PE=1 SV=1	GO:0006101//citrate metabolic process;GO:0006085//acetyl-CoA biosynthetic process;GO:0003878//ATP citrate synthase activity;GO:0046872//metal ion binding;GO:0005524//ATP binding;GO:0048037//cofactor binding;GO:0005737//cytoplasm;GO:0006629//lipid metabolic process
Unigene43321_All	2258	ko01100//Metabolic pathways;ko00020//Citrate cycle (TCA cycle);ko01110//Biosynthesis of secondary metabolites;ko01230//Biosynthesis of amino acids;ko01200//Carbon metabolism;ko01210//2-Oxocarboxylic acid metabolism	Metabolism	Global and overview maps;Carbohydrate metabolism	-7.1678	8.25034e-160	4.7424e-161	K00030//isocitrate dehydrogenase (NAD+) [EC:1.1.1.41]+ko00020//Citrate cycle (TCA cycle)+ko01230//Biosynthesis of amino acids+ko01100//Metabolic pathways+ko01110//Biosynthesis of secondary metabolites+ko01210//2-Oxocarboxylic acid metabolism+ko01200//Carbon metabolism;K00030//isocitrate dehydrogenase (NAD+) [EC:1.1.1.41]+ko00020//Citrate cycle (TCA cycle)+ko01230//Biosynthesis of amino acids+ko01…	Isocitrate/isopropylmalate dehydrogenase		Isocitrate dehydrogenase [NAD] catalytic subunit 5, mitochondrial [Triticum urartu]	[E] KOG0785 Isocitrate dehydrogenase, alpha subunit	Isocitrate dehydrogenase [NAD] catalytic subunit 6, mitochondrial OS=Arabidopsis thaliana GN=IDH6 PE=1 SV=2	GO:0006099//tricarboxylic acid cycle;GO:0000287//magnesium ion binding;GO:0004449//isocitrate dehydrogenase (NAD+) activity;GO:0051287//NAD binding;GO:0005739//mitochondrion
Unigene74714_All	1513	ko01200//Carbon metabolism;ko01230//Biosynthesis of amino acids;ko04146//Peroxisome;ko00020//Citrate cycle (TCA cycle);ko01210//2-Oxocarboxylic acid metabolism;ko00480//Glutathione metabolism;ko01110//Biosynthesis of secondary metabolites;ko01100//Metabolic pathways	Cellular Processes;Metabolism	Transport and catabolism;Global and overview maps;Carbohydrate metabolism;Metabolism of other amino acids	-7.4438	4.77527e-20	1.211e-20	K00031//isocitrate dehydrogenase [EC:1.1.1.42]+ko04146//Peroxisome+ko00020//Citrate cycle (TCA cycle)+ko01230//Biosynthesis of amino acids+ko01100//Metabolic pathways+ko01110//Biosynthesis of secondary metabolites+ko01210//2-Oxocarboxylic acid metabolism+ko01200//Carbon metabolism+ko00480//Glutathione metabolism;K00031//isocitrate dehydrogenase [EC:1.1.1.42]+ko04146//Peroxisome+ko00020//Citrate c…	Isocitrate/isopropylmalate dehydrogenase	XM_011401993.1 Auxenochlorella protothecoides Isocitrate dehydrogenase [NADP], chloroplastic partial mRNA	predicted protein [Hordeum vulgare subsp. vulgare]	[C] KOG1526 NADP-dependent isocitrate dehydrogenase	Isocitrate dehydrogenase [NADP] OS=Glycine max GN=IDH1 PE=2 SV=2	GO:0006099//tricarboxylic acid cycle;GO:0000287//magnesium ion binding;GO:0004450//isocitrate dehydrogenase (NADP+) activity;GO:0006102//isocitrate metabolic process;GO:0051287//NAD binding
Unigene86005_All	1328	ko00190//Oxidative phosphorylation;ko00020//Citrate cycle (TCA cycle);ko01200//Carbon metabolism;ko01110//Biosynthesis of secondary metabolites;ko01100//Metabolic pathways	Metabolism	Global and overview maps;Energy metabolism;Carbohydrate metabolism	-7.51014	7.92195e-21	1.95402e-21	K00234//succinate dehydrogenase (ubiquinone) flavoprotein subunit [EC:1.3.5.1]+ko00020//Citrate cycle (TCA cycle)+ko01100//Metabolic pathways+ko00190//Oxidative phosphorylation+ko01110//Biosynthesis of secondary metabolites+ko01200//Carbon metabolism;K00234//succinate dehydrogenase (ubiquinone) flavoprotein subunit [EC:1.3.5.1]+ko00020//Citrate cycle (TCA cycle)+ko01100//Metabolic pathways+ko0019…	FAD binding domain	XM_001689790.1 Chlamydomonas reinhardtii succinate dehydrogenase subunit A (SDH1), mRNA	predicted protein [Physcomitrella patens] >EDQ54899.1 predicted protein [Physcomitrella patens]	[C] KOG2403 Succinate dehydrogenase, flavoprotein subunit	Succinate dehydrogenase [ubiquinone] flavoprotein subunit 1, mitochondrial OS=Arabidopsis thaliana GN=SDH1-1 PE=1 SV=1	GO:0009055//electron transfer activity;GO:0006121//mitochondrial electron transport, succinate to ubiquinone;GO:0050660//flavin adenine dinucleotide binding;GO:0006099//tricarboxylic acid cycle;GO:0022900//electron transport chain;GO:0005749//mitochondrial respiratory chain complex II, succinate dehydrogenase complex (ubiquinone);GO:0000104//succinate dehydrogenase activity;GO:0005743//mitochondr…
Unigene7213_All	2973	ko00020//Citrate cycle (TCA cycle);ko01100//Metabolic pathways;ko01110//Biosynthesis of secondary metabolites	Metabolism	Global and overview maps;Carbohydrate metabolism	-7.71684	1.87317e-23	4.26357e-24	K01648//ATP citrate (pro-S)-lyase [EC:2.3.3.8]+ko00020//Citrate cycle (TCA cycle)+ko01100//Metabolic pathways+ko01110//Biosynthesis of secondary metabolites;K01648//ATP citrate (pro-S)-lyase [EC:2.3.3.8]+ko00020//Citrate cycle (TCA cycle)+ko01100//Metabolic pathways+ko01110//Biosynthesis of secondary metabolites;K01648//ATP citrate (pro-S)-lyase [EC:2.3.3.8]+ko00020//Citrate cycle (TCA cycle)+ko0…	Citrate synthase, C-terminal domain	XM_008608685.1 Saprolegnia diclina VS20 ATP-citrate synthase mRNA	atp-citrate synthase [Phaeodactylum tricornutum CCAP 1055/1] >EEC48223.1 atp-citrate synthase [Phaeodactylum tricornutum CCAP 1055/1]	[C] KOG1254 ATP-citrate lyase	ATP-citrate synthase beta chain protein 2 OS=Arabidopsis thaliana GN=ACLB-2 PE=1 SV=1	GO:0006101//citrate metabolic process;GO:0006085//acetyl-CoA biosynthetic process;GO:0003878//ATP citrate synthase activity;GO:0046872//metal ion binding;GO:0005524//ATP binding;GO:0048037//cofactor binding;GO:0005737//cytoplasm;GO:0006629//lipid metabolic process
Unigene46948_All	1263	ko01110//Biosynthesis of secondary metabolites;ko00010//Glycolysis / Gluconeogenesis;ko00620//Pyruvate metabolism;ko01200//Carbon metabolism;ko01100//Metabolic pathways;ko00020//Citrate cycle (TCA cycle)	Metabolism	Global and overview maps;Carbohydrate metabolism	-8.20933	6.9695e-61	8.17071e-62	K00161//pyruvate dehydrogenase E1 component alpha subunit [EC:1.2.4.1]+ko00010//Glycolysis / Gluconeogenesis+ko00020//Citrate cycle (TCA cycle)+ko01100//Metabolic pathways+ko01110//Biosynthesis of secondary metabolites+ko00620//Pyruvate metabolism+ko01200//Carbon metabolism;K00161//pyruvate dehydrogenase E1 component alpha subunit [EC:1.2.4.1]+ko00010//Glycolysis / Gluconeogenesis+ko00020//Citrat…	Dehydrogenase E1 component		pyruvate dehydrogenase E1 component alpha subunit [Zea mays]	[C] KOG0225 Pyruvate dehydrogenase E1, alpha subunit	Pyruvate dehydrogenase E1 component subunit alpha-2, mitochondrial OS=Oryza sativa subsp. japonica GN=Os06g0246500 PE=2 SV=1	GO:0043231//intracellular membrane-bounded organelle;GO:0004739//pyruvate dehydrogenase (acetyl-transferring) activity;GO:0006086//acetyl-CoA biosynthetic process from pyruvate
Unigene24228_All	4349	ko01210//2-Oxocarboxylic acid metabolism;ko01110//Biosynthesis of secondary metabolites;ko00020//Citrate cycle (TCA cycle);ko01230//Biosynthesis of amino acids;ko01200//Carbon metabolism;ko01100//Metabolic pathways	Metabolism	Carbohydrate metabolism;Global and overview maps	-8.89859	2.9936e-90	2.62689e-91	K00030//isocitrate dehydrogenase (NAD+) [EC:1.1.1.41]+ko00020//Citrate cycle (TCA cycle)+ko01230//Biosynthesis of amino acids+ko01100//Metabolic pathways+ko01110//Biosynthesis of secondary metabolites+ko01210//2-Oxocarboxylic acid metabolism+ko01200//Carbon metabolism;K00030//isocitrate dehydrogenase (NAD+) [EC:1.1.1.41]+ko00020//Citrate cycle (TCA cycle)+ko01230//Biosynthesis of amino acids+ko01…	Tripartite tricarboxylate transporter TctA family		isocitrate dehydrogenase subunit 2, mitochondrial precursor [Cyanidioschyzon merolae strain 10D] >BAM82866.1 isocitrate dehydrogenase subunit 2, mitochondrial precursor [Cyanidioschyzon merolae strain 10D]	[E] KOG0785 Isocitrate dehydrogenase, alpha subunit	3-isopropylmalate dehydrogenase, chloroplastic OS=Solanum tuberosum PE=2 SV=1	GO:0006099//tricarboxylic acid cycle;GO:0004449//isocitrate dehydrogenase (NAD+) activity

## Sheet: Pyruvate metabolism
Supplementary Table 3:	Differentially expressed genes involved in pyruvate metabolism
Gene ID	Length	Pathway Name	Level 1	Level 2	log2(He_1000/He_400)	Qvalue(He_400-vs-He_1000)	Pvalue(He_400-vs-He_1000)	Kegg Orthology	Pfam	Nt	Nr	Kog	Swissprot	GO
CL553.Contig1_All	2604	ko00260//Glycine, serine and threonine metabolism;ko01230//Biosynthesis of amino acids;ko01200//Carbon metabolism;ko00620//Pyruvate metabolism;ko01100//Metabolic pathways	Metabolism	Amino acid metabolism;Global and overview maps;Carbohydrate metabolism	6.10064	2.20476e-09	9.2402e-10	K03778//D-lactate dehydrogenase [EC:1.1.1.28]+ko00620//Pyruvate metabolism;K03778//D-lactate dehydrogenase [EC:1.1.1.28]+ko00620//Pyruvate metabolism;K00058//D-3-phosphoglycerate dehydrogenase / 2-oxoglutarate reductase [EC:1.1.1.95 1.1.1.399]+ko01230//Biosynthesis of amino acids+ko01100//Metabolic pathways+ko00260//Glycine, serine and threonine metabolism+ko01200//Carbon metabolism;K00058//D-3-p…	D-isomer specific 2-hydroxyacid dehydrogenase, NAD binding domain		D-isomer specific 2-hydroxyacid dehydrogenase [Thraustotheca clavata]	[E] KOG0068 D-3-phosphoglycerate dehydrogenase, D-isomer-specific 2-hydroxy acid dehydrogenase superfamily	D-3-phosphoglycerate dehydrogenase 2, chloroplastic OS=Arabidopsis thaliana GN=PGDH2 PE=1 SV=2	GO:0016616//oxidoreductase activity, acting on the CH-OH group of donors, NAD or NADP as acceptor;GO:0051287//NAD binding
Unigene54467_All	618	ko01200//Carbon metabolism;ko00230//Purine metabolism;ko00620//Pyruvate metabolism;ko01100//Metabolic pathways;ko01230//Biosynthesis of amino acids;ko01110//Biosynthesis of secondary metabolites;ko00010//Glycolysis / Gluconeogenesis	Metabolism	Carbohydrate metabolism;Global and overview maps;Nucleotide metabolism	4.55056	0.000646709	0.000481528	K00873//pyruvate kinase [EC:2.7.1.40]+ko00010//Glycolysis / Gluconeogenesis+ko00230//Purine metabolism+ko01230//Biosynthesis of amino acids+ko01100//Metabolic pathways+ko01110//Biosynthesis of secondary metabolites+ko00620//Pyruvate metabolism+ko01200//Carbon metabolism;K00873//pyruvate kinase [EC:2.7.1.40]+ko00010//Glycolysis / Gluconeogenesis+ko00230//Purine metabolism+ko01230//Biosynthesis of …	Pyruvate kinase, barrel domain	XM_002183733.1 Phaeodactylum tricornutum CCAP 1055/1 kinase pyruvate kinase 3 (PK3), mRNA	pyruvate kinase [Galdieria sulphuraria] >EME27600.1 pyruvate kinase [Galdieria sulphuraria]	[G] KOG2323 Pyruvate kinase	Pyruvate kinase, cytosolic isozyme OS=Solanum tuberosum PE=2 SV=1	GO:0030955//potassium ion binding;GO:0000287//magnesium ion binding;GO:0004743//pyruvate kinase activity;GO:0016301//kinase activity
CL519.Contig5_All	2108	ko00620//Pyruvate metabolism;ko01200//Carbon metabolism;ko01100//Metabolic pathways;ko00710//Carbon fixation in photosynthetic organisms	Metabolism	Carbohydrate metabolism;Energy metabolism;Global and overview maps	3.0808	2.9909e-25	6.48403e-26	K00029//malate dehydrogenase (oxaloacetate-decarboxylating)(NADP+) [EC:1.1.1.40]+ko01100//Metabolic pathways+ko00710//Carbon fixation in photosynthetic organisms+ko00620//Pyruvate metabolism+ko01200//Carbon metabolism;K00029//malate dehydrogenase (oxaloacetate-decarboxylating)(NADP+) [EC:1.1.1.40]+ko01100//Metabolic pathways+ko00710//Carbon fixation in photosynthetic organisms+ko00620//Pyruvate m…	Malic enzyme, NAD binding domain	JX295577.2 Aegilops tauschii chromosome 1Ds prolamin gene locus, complete sequence	malic enzyme [Petalonia fascia]	[C] KOG1257 NADP+-dependent malic enzyme	NADP-dependent malic enzyme, chloroplastic OS=Zea mays GN=MOD1 PE=1 SV=1
Unigene4920_All	1446	ko00620//Pyruvate metabolism	Metabolism	Carbohydrate metabolism	1.9673	0	0	K01069//hydroxyacylglutathione hydrolase [EC:3.1.2.6]+ko00620//Pyruvate metabolism;K01069//hydroxyacylglutathione hydrolase [EC:3.1.2.6]+ko00620//Pyruvate metabolism;K01069//hydroxyacylglutathione hydrolase [EC:3.1.2.6]+ko00620//Pyruvate metabolism	Hydroxyacylglutathione hydrolase C-terminus		conserved unknown protein [Ectocarpus siliculosus]	[R] KOG0813 Glyoxylase	Hydroxyacylglutathione hydrolase cytoplasmic OS=Arabidopsis thaliana GN=GLX2-2 PE=1 SV=2	GO:0004416//hydroxyacylglutathione hydrolase activity;GO:0019243//methylglyoxal catabolic process to D-lactate via S-lactoyl-glutathione
Unigene6042_All	4434	ko03430//Mismatch repair;ko00620//Pyruvate metabolism;ko03030//DNA replication;ko03420//Nucleotide excision repair	Genetic Information Processing;Metabolism	Carbohydrate metabolism;Replication and repair	1.88395	2.37281e-94	2.01677e-95	K19525//vacuolar protein sorting-associated protein 13A/C;K01303//acylaminoacyl-peptidase [EC:3.4.19.1];K15255//ATP-dependent DNA helicase PIF1 [EC:3.6.4.12];K00102//D-lactate dehydrogenase (cytochrome) [EC:1.1.2.4]+ko00620//Pyruvate metabolism;K10756//replication factor C subunit 3/5+ko03420//Nucleotide excision repair+ko03030//DNA replication+ko03430//Mismatch repair	Reverse transcriptase (RNA-dependent DNA polymerase)		PREDICTED: uncharacterized protein LOC103499392 [Cucumis melo]	[R] KOG0017 FOG: Transposon-encoded proteins with TYA, reverse transcriptase, integrase domains in various combinations		GO:0015074//DNA integration;GO:0003676//nucleic acid binding
Unigene6715_All	2343	ko00640//Propanoate metabolism;ko00260//Glycine, serine and threonine metabolism;ko00620//Pyruvate metabolism;ko01200//Carbon metabolism;ko00020//Citrate cycle (TCA cycle);ko00010//Glycolysis / Gluconeogenesis;ko01110//Biosynthesis of secondary metabolites;ko00630//Glyoxylate and dicarboxylate metabolism;ko01100//Metabolic pathways;ko00280//Valine, leucine and isoleucine degradation	Metabolism	Carbohydrate metabolism;Amino acid metabolism;Global and overview maps	1.86598	0	0	K00382//dihydrolipoamide dehydrogenase [EC:1.8.1.4]+ko00010//Glycolysis / Gluconeogenesis+ko00020//Citrate cycle (TCA cycle)+ko00280//Valine, leucine and isoleucine degradation+ko00640//Propanoate metabolism+ko01100//Metabolic pathways+ko01110//Biosynthesis of secondary metabolites+ko00260//Glycine, serine and threonine metabolism+ko00620//Pyruvate metabolism+ko01200//Carbon metabolism+ko00630//G…	Pyridine nucleotide-disulphide oxidoreductase		dihydrolipoamide dehydrogenase [Ectocarpus siliculosus]	[C] KOG1335 Dihydrolipoamide dehydrogenase	Dihydrolipoyl dehydrogenase 1, chloroplastic OS=Arabidopsis thaliana GN=LPD1 PE=2 SV=1	GO:0009055//electron transfer activity;GO:0004148//dihydrolipoyl dehydrogenase activity;GO:0005623//cell;GO:0050660//flavin adenine dinucleotide binding;GO:0045454//cell redox homeostasis
Unigene225_All	2017	ko00020//Citrate cycle (TCA cycle);ko01110//Biosynthesis of secondary metabolites;ko01100//Metabolic pathways;ko00010//Glycolysis / Gluconeogenesis;ko00710//Carbon fixation in photosynthetic organisms;ko00620//Pyruvate metabolism;ko01200//Carbon metabolism	Metabolism	Carbohydrate metabolism;Global and overview maps;Energy metabolism	1.63169	4.10303e-31	7.75705e-32	K01610//phosphoenolpyruvate carboxykinase (ATP) [EC:4.1.1.49]+ko00010//Glycolysis / Gluconeogenesis+ko00020//Citrate cycle (TCA cycle)+ko01100//Metabolic pathways+ko01110//Biosynthesis of secondary metabolites+ko00710//Carbon fixation in photosynthetic organisms+ko00620//Pyruvate metabolism+ko01200//Carbon metabolism;K01610//phosphoenolpyruvate carboxykinase (ATP) [EC:4.1.1.49]+ko00010//Glycolysi…	Phosphoenolpyruvate carboxykinase		phosphoenolpyruvate carboxykinase [Thalassiosira pseudonana]	[C] TWOG0797 Phosphoenolpyruvate carboxykinase (ATP)	Phosphoenolpyruvate carboxykinase (ATP) 2 OS=Urochloa panicoides GN=PCK2 PE=2 SV=1	GO:0005524//ATP binding;GO:0006094//gluconeogenesis;GO:0016301//kinase activity;GO:0005829//cytosol;GO:0004612//phosphoenolpyruvate carboxykinase (ATP) activity
Unigene11485_All	2223	ko00020//Citrate cycle (TCA cycle);ko00280//Valine, leucine and isoleucine degradation;ko01100//Metabolic pathways;ko00260//Glycine, serine and threonine metabolism;ko01110//Biosynthesis of secondary metabolites;ko01200//Carbon metabolism;ko00620//Pyruvate metabolism;ko00630//Glyoxylate and dicarboxylate metabolism;ko00010//Glycolysis / Gluconeogenesis;ko00640//Propanoate metabolism	Metabolism	Global and overview maps;Amino acid metabolism;Carbohydrate metabolism	1.484	1.61245e-06	8.53954e-07	K00382//dihydrolipoamide dehydrogenase [EC:1.8.1.4]+ko00010//Glycolysis / Gluconeogenesis+ko00020//Citrate cycle (TCA cycle)+ko00280//Valine, leucine and isoleucine degradation+ko00640//Propanoate metabolism+ko01100//Metabolic pathways+ko01110//Biosynthesis of secondary metabolites+ko00260//Glycine, serine and threonine metabolism+ko00620//Pyruvate metabolism+ko01200//Carbon metabolism+ko00630//G…	Herpesvirus UL6 like		dihydrolipoamide dehydrogenase [Ectocarpus siliculosus]	[C] KOG1335 Dihydrolipoamide dehydrogenase	Dihydrolipoyl dehydrogenase 1, chloroplastic OS=Arabidopsis thaliana GN=LPD1 PE=2 SV=1	GO:0009055//electron transfer activity;GO:0005623//cell;GO:0050660//flavin adenine dinucleotide binding;GO:0016668//oxidoreductase activity, acting on a sulfur group of donors, NAD(P) as acceptor;GO:0045454//cell redox homeostasis
CL9022.Contig2_All	1329	ko01110//Biosynthesis of secondary metabolites;ko01100//Metabolic pathways;ko00640//Propanoate metabolism;ko00620//Pyruvate metabolism;ko01212//Fatty acid metabolism;ko00061//Fatty acid biosynthesis	Metabolism	Carbohydrate metabolism;Global and overview maps;Lipid metabolism	1.41895	5.49891e-12	1.96729e-12	K11262//acetyl-CoA carboxylase / biotin carboxylase 1 [EC:6.4.1.2 6.3.4.14 2.1.3.15]+ko00640//Propanoate metabolism+ko01100//Metabolic pathways+ko01110//Biosynthesis of secondary metabolites+ko00061//Fatty acid biosynthesis+ko01212//Fatty acid metabolism+ko00620//Pyruvate metabolism;K11262//acetyl-CoA carboxylase / biotin carboxylase 1 [EC:6.4.1.2 6.3.4.14 2.1.3.15]+ko00640//Propanoate metabolism…			hypothetical protein H257_02420 [Aphanomyces astaci] >ETV85873.1 hypothetical protein H257_02420 [Aphanomyces astaci]	[I] KOG0368 Acetyl-CoA carboxylase	Acetyl-CoA carboxylase 1 OS=Oryza sativa subsp. japonica GN=ACC1 PE=3 SV=1	GO:0003989//acetyl-CoA carboxylase activity;GO:0046872//metal ion binding;GO:0004075//biotin carboxylase activity;GO:0005524//ATP binding;GO:0006633//fatty acid biosynthetic process
Unigene27334_All	483	ko00020//Citrate cycle (TCA cycle);ko01100//Metabolic pathways;ko00630//Glyoxylate and dicarboxylate metabolism;ko00270//Cysteine and methionine metabolism;ko00620//Pyruvate metabolism;ko01110//Biosynthesis of secondary metabolites;ko01200//Carbon metabolism;ko00710//Carbon fixation in photosynthetic organisms	Metabolism	Carbohydrate metabolism;Global and overview maps;Energy metabolism;Amino acid metabolism	1.37499	2.10862e-06	1.13271e-06	K00025//malate dehydrogenase [EC:1.1.1.37]+ko00020//Citrate cycle (TCA cycle)+ko01100//Metabolic pathways+ko01110//Biosynthesis of secondary metabolites+ko00710//Carbon fixation in photosynthetic organisms+ko00620//Pyruvate metabolism+ko00270//Cysteine and methionine metabolism+ko01200//Carbon metabolism+ko00630//Glyoxylate and dicarboxylate metabolism;K00025//malate dehydrogenase [EC:1.1.1.37]+k…	lactate/malate dehydrogenase, NAD binding domain		malate dehydrogenase [Scytosiphon lomentaria]	[C] KOG1496 Malate dehydrogenase	Malate dehydrogenase, cytoplasmic OS=Mesembryanthemum crystallinum GN=MDH PE=2 SV=1	GO:0016616//oxidoreductase activity, acting on the CH-OH group of donors, NAD or NADP as acceptor;GO:0005737//cytoplasm;GO:0006734//NADH metabolic process;GO:0006108//malate metabolic process;GO:0006099//tricarboxylic acid cycle;GO:0006107//oxaloacetate metabolic process;GO:0016615//malate dehydrogenase activity;GO:0016021//integral component of membrane;GO:0005975//carbohydrate metabolic process…
Unigene42164_All	1178	ko00620//Pyruvate metabolism	Metabolism	Carbohydrate metabolism	1.35022	0	0	K01759//lactoylglutathione lyase [EC:4.4.1.5]+ko00620//Pyruvate metabolism;K01759//lactoylglutathione lyase [EC:4.4.1.5]+ko00620//Pyruvate metabolism;K01759//lactoylglutathione lyase [EC:4.4.1.5]+ko00620//Pyruvate metabolism;K01759//lactoylglutathione lyase [EC:4.4.1.5]+ko00620//Pyruvate metabolism	Glyoxalase/Bleomycin resistance protein/Dioxygenase superfamily		PREDICTED: probable lactoylglutathione lyase, chloroplastic [Vigna angularis]	[G] KOG2944 Glyoxalase	Lactoylglutathione lyase GLX1 OS=Arabidopsis thaliana GN=GLX1 PE=1 SV=1	GO:0004462//lactoylglutathione lyase activity;GO:0046872//metal ion binding
Unigene8016_All	1857	ko00620//Pyruvate metabolism	Metabolism	Carbohydrate metabolism	1.24504	9.71282e-08	4.60612e-08	K18881//D-lactate dehydratase [EC:4.2.1.130]+ko00620//Pyruvate metabolism;K18881//D-lactate dehydratase [EC:4.2.1.130]+ko00620//Pyruvate metabolism;K18881//D-lactate dehydratase [EC:4.2.1.130]+ko00620//Pyruvate metabolism		KP332213.1 Chrysanthemum x morifolium microsatellite JH-372 sequence	predicted protein [Physcomitrella patens] >EDQ63138.1 predicted protein [Physcomitrella patens]	[RV] KOG2764 Putative transcriptional regulator DJ-1	Protein DJ-1 homolog D OS=Arabidopsis thaliana GN=DJ1D PE=1 SV=1	GO:0019172//glyoxalase III activity
CL4986.Contig2_All	2000	ko01100//Metabolic pathways;ko00230//Purine metabolism;ko01230//Biosynthesis of amino acids;ko00620//Pyruvate metabolism;ko00010//Glycolysis / Gluconeogenesis;ko01200//Carbon metabolism;ko01110//Biosynthesis of secondary metabolites	Metabolism	Nucleotide metabolism;Global and overview maps;Carbohydrate metabolism	1.17718	0	0	K00873//pyruvate kinase [EC:2.7.1.40]+ko00010//Glycolysis / Gluconeogenesis+ko00230//Purine metabolism+ko01230//Biosynthesis of amino acids+ko01100//Metabolic pathways+ko01110//Biosynthesis of secondary metabolites+ko00620//Pyruvate metabolism+ko01200//Carbon metabolism;K00873//pyruvate kinase [EC:2.7.1.40]+ko00010//Glycolysis / Gluconeogenesis+ko00230//Purine metabolism+ko01230//Biosynthesis of …	Pyruvate kinase, barrel domain	KM113644.1 Sargassum hemiphyllum var. chinense isolate VYER-2086342 pyruvate kinase (pk) mRNA, complete cds	pyruvate kinase [Aphanomyces astaci] >ETV87778.1 pyruvate kinase [Aphanomyces astaci]	[G] KOG2323 Pyruvate kinase	Pyruvate kinase, cytosolic isozyme OS=Glycine max PE=2 SV=1	GO:0030955//potassium ion binding;GO:0000287//magnesium ion binding;GO:0004743//pyruvate kinase activity;GO:0016301//kinase activity
Unigene41559_All	2918	ko00620//Pyruvate metabolism;ko01110//Biosynthesis of secondary metabolites;ko00020//Citrate cycle (TCA cycle);ko01100//Metabolic pathways;ko00010//Glycolysis / Gluconeogenesis;ko01200//Carbon metabolism	Metabolism	Carbohydrate metabolism;Global and overview maps	1.16898	0	0	K00161//pyruvate dehydrogenase E1 component alpha subunit [EC:1.2.4.1]+ko00010//Glycolysis / Gluconeogenesis+ko00020//Citrate cycle (TCA cycle)+ko01100//Metabolic pathways+ko01110//Biosynthesis of secondary metabolites+ko00620//Pyruvate metabolism+ko01200//Carbon metabolism;K00161//pyruvate dehydrogenase E1 component alpha subunit [EC:1.2.4.1]+ko00010//Glycolysis / Gluconeogenesis+ko00020//Citrat…	Dehydrogenase E1 component		hypothetical protein GUITHDRAFT_164161 [Guillardia theta CCMP2712] >EKX42366.1 hypothetical protein GUITHDRAFT_164161 [Guillardia theta CCMP2712]	[C] KOG0225 Pyruvate dehydrogenase E1, alpha subunit	Pyruvate dehydrogenase E1 component subunit beta OS=Pyropia yezoensis GN=pdhB PE=3 SV=1	GO:0016624//oxidoreductase activity, acting on the aldehyde or oxo group of donors, disulfide as acceptor
CL385.Contig5_All	990	ko01200//Carbon metabolism;ko01100//Metabolic pathways;ko00010//Glycolysis / Gluconeogenesis;ko00650//Butanoate metabolism;ko00630//Glyoxylate and dicarboxylate metabolism;ko00280//Valine, leucine and isoleucine degradation;ko01110//Biosynthesis of secondary metabolites;ko00640//Propanoate metabolism;ko00620//Pyruvate metabolism	Metabolism	Carbohydrate metabolism;Global and overview maps;Amino acid metabolism	1.11735	1.15359e-12	3.96282e-13	K01907//acetoacetyl-CoA synthetase [EC:6.2.1.16]+ko00280//Valine, leucine and isoleucine degradation+ko00650//Butanoate metabolism;K01895//acetyl-CoA synthetase [EC:6.2.1.1]+ko00010//Glycolysis / Gluconeogenesis+ko00640//Propanoate metabolism+ko01100//Metabolic pathways+ko01110//Biosynthesis of secondary metabolites+ko00620//Pyruvate metabolism+ko01200//Carbon metabolism+ko00630//Glyoxylate and d…	AMP-binding enzyme C-terminal domain		acetoacetyl-coenzyme A synthetase [Achlya hypogyna]	[I] KOG1175 Acyl-CoA synthetase	Probable acyl-activating enzyme 17, peroxisomal OS=Arabidopsis thaliana GN=AAE17 PE=2 SV=1	GO:0030729//acetoacetate-CoA ligase activity;GO:0006629//lipid metabolic process
CL10574.Contig2_All	2616	ko00010//Glycolysis / Gluconeogenesis;ko01200//Carbon metabolism;ko00640//Propanoate metabolism;ko01110//Biosynthesis of secondary metabolites;ko00620//Pyruvate metabolism;ko00630//Glyoxylate and dicarboxylate metabolism;ko01100//Metabolic pathways	Metabolism	Carbohydrate metabolism;Global and overview maps	1.01843	3.44766e-300	1.18295e-301	K01895//acetyl-CoA synthetase [EC:6.2.1.1]+ko00010//Glycolysis / Gluconeogenesis+ko00640//Propanoate metabolism+ko01100//Metabolic pathways+ko01110//Biosynthesis of secondary metabolites+ko00620//Pyruvate metabolism+ko01200//Carbon metabolism+ko00630//Glyoxylate and dicarboxylate metabolism;K01895//acetyl-CoA synthetase [EC:6.2.1.1]+ko00010//Glycolysis / Gluconeogenesis+ko00640//Propanoate metabo…	AMP-binding enzyme	XM_001700178.1 Chlamydomonas reinhardtii acetyl CoA synthetase (ACS2), partial mRNA	acetyl- synthetase [Nannochloropsis gaditana]	[I] KOG1175 Acyl-CoA synthetase	Acetyl-coenzyme A synthetase, chloroplastic/glyoxysomal OS=Arabidopsis thaliana GN=ACS PE=1 SV=1	GO:0019427//acetyl-CoA biosynthetic process from acetate;GO:0003987//acetate-CoA ligase activity;GO:0005524//ATP binding;GO:0016208//AMP binding
Unigene48554_All	2542	ko01110//Biosynthesis of secondary metabolites;ko01100//Metabolic pathways;ko00620//Pyruvate metabolism;ko00020//Citrate cycle (TCA cycle);ko00010//Glycolysis / Gluconeogenesis;ko01200//Carbon metabolism	Metabolism	Carbohydrate metabolism;Global and overview maps	1.00465	0	0	K00161//pyruvate dehydrogenase E1 component alpha subunit [EC:1.2.4.1]+ko00010//Glycolysis / Gluconeogenesis+ko00020//Citrate cycle (TCA cycle)+ko01100//Metabolic pathways+ko01110//Biosynthesis of secondary metabolites+ko00620//Pyruvate metabolism+ko01200//Carbon metabolism;K00161//pyruvate dehydrogenase E1 component alpha subunit [EC:1.2.4.1]+ko00010//Glycolysis / Gluconeogenesis+ko00020//Citrat…	Dehydrogenase E1 component	XM_009037186.1 Aureococcus anophagefferens hypothetical protein mRNA	pyruvate dehydrogenase e1 component alpha subunit [Nannochloropsis gaditana]	[C] KOG0225 Pyruvate dehydrogenase E1, alpha subunit	Pyruvate dehydrogenase E1 component subunit alpha-2, mitochondrial OS=Arabidopsis thaliana GN=IAR4 PE=1 SV=2	GO:0043231//intracellular membrane-bounded organelle;GO:0004739//pyruvate dehydrogenase (acetyl-transferring) activity;GO:0006086//acetyl-CoA biosynthetic process from pyruvate
Unigene18571_All	1530	ko01200//Carbon metabolism;ko01110//Biosynthesis of secondary metabolites;ko00010//Glycolysis / Gluconeogenesis;ko00620//Pyruvate metabolism;ko01100//Metabolic pathways;ko00020//Citrate cycle (TCA cycle)	Metabolism	Global and overview maps;Carbohydrate metabolism	-1.00224	6.96124e-183	3.59258e-184	K00162//pyruvate dehydrogenase E1 component beta subunit [EC:1.2.4.1]+ko00010//Glycolysis / Gluconeogenesis+ko00020//Citrate cycle (TCA cycle)+ko01100//Metabolic pathways+ko01110//Biosynthesis of secondary metabolites+ko00620//Pyruvate metabolism+ko01200//Carbon metabolism;K00162//pyruvate dehydrogenase E1 component beta subunit [EC:1.2.4.1]+ko00010//Glycolysis / Gluconeogenesis+ko00020//Citrate …		XM_005846322.1 Chlorella variabilis hypothetical protein (CHLNCDRAFT_59713) mRNA, complete cds	Pyruvate dehydrogenase E1 component subunit beta [Phytophthora megakarya]	[C] KOG0524 Pyruvate dehydrogenase E1, beta subunit	Pyruvate dehydrogenase E1 component subunit beta-1, mitochondrial OS=Oryza sativa subsp. japonica GN=Os08g0536000 PE=2 SV=1	GO:0005759//mitochondrial matrix;GO:0006096//glycolytic process;GO:0004739//pyruvate dehydrogenase (acetyl-transferring) activity;GO:0006086//acetyl-CoA biosynthetic process from pyruvate
CL7592.Contig2_All	1318	ko00620//Pyruvate metabolism	Metabolism	Carbohydrate metabolism	-1.01108	0.000868316	0.000659407	K01069//hydroxyacylglutathione hydrolase [EC:3.1.2.6]+ko00620//Pyruvate metabolism;K01069//hydroxyacylglutathione hydrolase [EC:3.1.2.6]+ko00620//Pyruvate metabolism;K01069//hydroxyacylglutathione hydrolase [EC:3.1.2.6]+ko00620//Pyruvate metabolism;K01069//hydroxyacylglutathione hydrolase [EC:3.1.2.6]+ko00620//Pyruvate metabolism;K01069//hydroxyacylglutathione hydrolase [EC:3.1.2.6]+ko00620//Pyru…	Hydroxyacylglutathione hydrolase C-terminus		Lactamase_B domain-containing protein [Cephalotus follicularis]	[R] KOG0813 Glyoxylase	Hydroxyacylglutathione hydrolase cytoplasmic OS=Arabidopsis thaliana GN=GLX2-2 PE=1 SV=2	GO:0004416//hydroxyacylglutathione hydrolase activity;GO:0019243//methylglyoxal catabolic process to D-lactate via S-lactoyl-glutathione
Unigene12118_All	5729	ko02010//ABC transporters;ko00620//Pyruvate metabolism	Metabolism;Environmental Information Processing	Membrane transport;Carbohydrate metabolism	-1.0176	9.59437e-37	1.60702e-37	K19525//vacuolar protein sorting-associated protein 13A/C;K01303//acylaminoacyl-peptidase [EC:3.4.19.1];K15255//ATP-dependent DNA helicase PIF1 [EC:3.6.4.12];K05666//ATP-binding cassette, subfamily C (CFTR/MRP), member 2+ko02010//ABC transporters;K00102//D-lactate dehydrogenase (cytochrome) [EC:1.1.2.4]+ko00620//Pyruvate metabolism	Integrase core domain		Gag-pol fusion protein [Phytophthora megakarya]	[R] KOG0017 FOG: Transposon-encoded proteins with TYA, reverse transcriptase, integrase domains in various combinations	Uncharacterized mitochondrial protein AtMg00860 OS=Arabidopsis thaliana GN=AtMg00860 PE=4 SV=1
Unigene5032_All	3354	ko00260//Glycine, serine and threonine metabolism;ko00010//Glycolysis / Gluconeogenesis;ko00630//Glyoxylate and dicarboxylate metabolism;ko00620//Pyruvate metabolism;ko01200//Carbon metabolism;ko00280//Valine, leucine and isoleucine degradation;ko01110//Biosynthesis of secondary metabolites;ko01100//Metabolic pathways;ko00640//Propanoate metabolism;ko00020//Citrate cycle (TCA cycle)	Metabolism	Global and overview maps;Amino acid metabolism;Carbohydrate metabolism	-1.04263	3.83716e-87	3.44738e-88	K00382//dihydrolipoamide dehydrogenase [EC:1.8.1.4]+ko00010//Glycolysis / Gluconeogenesis+ko00020//Citrate cycle (TCA cycle)+ko00280//Valine, leucine and isoleucine degradation+ko00640//Propanoate metabolism+ko01100//Metabolic pathways+ko01110//Biosynthesis of secondary metabolites+ko00260//Glycine, serine and threonine metabolism+ko00620//Pyruvate metabolism+ko01200//Carbon metabolism+ko00630//G…	Pyridine nucleotide-disulphide oxidoreductase		dihydrolipoamide dehydrogenase [Ectocarpus siliculosus]	[C] KOG1335 Dihydrolipoamide dehydrogenase	Dihydrolipoyl dehydrogenase 1, chloroplastic OS=Arabidopsis thaliana GN=LPD1 PE=2 SV=1	GO:0009055//electron transfer activity;GO:0004148//dihydrolipoyl dehydrogenase activity;GO:0005623//cell;GO:0050660//flavin adenine dinucleotide binding;GO:0045454//cell redox homeostasis
CL4529.Contig1_All	6898	ko01100//Metabolic pathways;ko00640//Propanoate metabolism;ko01110//Biosynthesis of secondary metabolites;ko00061//Fatty acid biosynthesis;ko01212//Fatty acid metabolism;ko00620//Pyruvate metabolism	Metabolism	Global and overview maps;Carbohydrate metabolism;Lipid metabolism	-1.05919	0	0	K11262//acetyl-CoA carboxylase / biotin carboxylase 1 [EC:6.4.1.2 6.3.4.14 2.1.3.15]+ko00640//Propanoate metabolism+ko01100//Metabolic pathways+ko01110//Biosynthesis of secondary metabolites+ko00061//Fatty acid biosynthesis+ko01212//Fatty acid metabolism+ko00620//Pyruvate metabolism;K11262//acetyl-CoA carboxylase / biotin carboxylase 1 [EC:6.4.1.2 6.3.4.14 2.1.3.15]+ko00640//Propanoate metabolism…	Carboxyl transferase domain	XM_005788150.1 Emiliania huxleyi CCMP1516 acetyl-CoA carboxylase (ACC-2), mRNA	acetyl-CoA carboxylase [Nannochloropsis oculata]	[I] KOG0368 Acetyl-CoA carboxylase	Acetyl-CoA carboxylase 1 OS=Arabidopsis thaliana GN=ACC1 PE=1 SV=1	GO:0003989//acetyl-CoA carboxylase activity;GO:0046872//metal ion binding;GO:0004075//biotin carboxylase activity;GO:0005524//ATP binding;GO:0006633//fatty acid biosynthetic process
Unigene38912_All	646	ko00020//Citrate cycle (TCA cycle);ko03040//Spliceosome;ko01110//Biosynthesis of secondary metabolites;ko00620//Pyruvate metabolism;ko01100//Metabolic pathways;ko00010//Glycolysis / Gluconeogenesis;ko01200//Carbon metabolism	Metabolism;Genetic Information Processing	Transcription;Global and overview maps;Carbohydrate metabolism	-1.0933	0.000166037	0.00011208	K12896//splicing factor, arginine/serine-rich 7+ko03040//Spliceosome;K02184//formin 2;K02184//formin 2;K02184//formin 2;K00627//pyruvate dehydrogenase E2 component (dihydrolipoamide acetyltransferase) [EC:2.3.1.12]+ko00010//Glycolysis / Gluconeogenesis+ko00020//Citrate cycle (TCA cycle)+ko01100//Metabolic pathways+ko01110//Biosynthesis of secondary metabolites+ko00620//Pyruvate metabolism+ko01200…			hypothetical protein BU14_0131s0028, partial [Porphyra umbilicalis]	[T] KOG4270 GTPase-activator protein	Proline-rich receptor-like protein kinase PERK8 OS=Arabidopsis thaliana GN=PERK8 PE=1 SV=1	GO:0004674//protein serine/threonine kinase activity;GO:0005524//ATP binding;GO:0005509//calcium ion binding;GO:0016021//integral component of membrane
Unigene25848_All	2221	ko00620//Pyruvate metabolism;ko00010//Glycolysis / Gluconeogenesis;ko01110//Biosynthesis of secondary metabolites;ko01100//Metabolic pathways;ko00630//Glyoxylate and dicarboxylate metabolism;ko00280//Valine, leucine and isoleucine degradation;ko01200//Carbon metabolism;ko00260//Glycine, serine and threonine metabolism;ko00640//Propanoate metabolism;ko00020//Citrate cycle (TCA cycle)	Metabolism	Amino acid metabolism;Carbohydrate metabolism;Global and overview maps	-1.09481	4.01468e-77	3.93712e-78	K00382//dihydrolipoamide dehydrogenase [EC:1.8.1.4]+ko00010//Glycolysis / Gluconeogenesis+ko00020//Citrate cycle (TCA cycle)+ko00280//Valine, leucine and isoleucine degradation+ko00640//Propanoate metabolism+ko01100//Metabolic pathways+ko01110//Biosynthesis of secondary metabolites+ko00260//Glycine, serine and threonine metabolism+ko00620//Pyruvate metabolism+ko01200//Carbon metabolism+ko00630//G…	Pyridine nucleotide-disulphide oxidoreductase		predicted protein [Phaeodactylum tricornutum CCAP 1055/1] >EEC48570.1 predicted protein [Phaeodactylum tricornutum CCAP 1055/1]	[C] KOG1335 Dihydrolipoamide dehydrogenase	Leghemoglobin reductase OS=Glycine max GN=FLBR PE=1 SV=1	GO:0050661//NADP binding;GO:0006749//glutathione metabolic process;GO:0005623//cell;GO:0050660//flavin adenine dinucleotide binding;GO:0016021//integral component of membrane;GO:0004362//glutathione-disulfide reductase activity;GO:0045454//cell redox homeostasis
Unigene15030_All	991	ko00010//Glycolysis / Gluconeogenesis;ko01110//Biosynthesis of secondary metabolites;ko00620//Pyruvate metabolism;ko00020//Citrate cycle (TCA cycle);ko01200//Carbon metabolism;ko01100//Metabolic pathways	Metabolism	Global and overview maps;Carbohydrate metabolism	-1.11591	6.62171e-09	2.87199e-09	K00627//pyruvate dehydrogenase E2 component (dihydrolipoamide acetyltransferase) [EC:2.3.1.12]+ko00010//Glycolysis / Gluconeogenesis+ko00020//Citrate cycle (TCA cycle)+ko01100//Metabolic pathways+ko01110//Biosynthesis of secondary metabolites+ko00620//Pyruvate metabolism+ko01200//Carbon metabolism	Prefoldin subunit		PREDICTED: formin-like protein 14 [Vigna angularis]
Unigene10339_All	2382	ko01200//Carbon metabolism;ko00640//Propanoate metabolism;ko00020//Citrate cycle (TCA cycle);ko00010//Glycolysis / Gluconeogenesis;ko01110//Biosynthesis of secondary metabolites;ko00630//Glyoxylate and dicarboxylate metabolism;ko00260//Glycine, serine and threonine metabolism;ko01100//Metabolic pathways;ko00280//Valine, leucine and isoleucine degradation;ko00620//Pyruvate metabolism	Metabolism	Carbohydrate metabolism;Amino acid metabolism;Global and overview maps	-1.13854	1.52029e-60	1.79119e-61	K00382//dihydrolipoamide dehydrogenase [EC:1.8.1.4]+ko00010//Glycolysis / Gluconeogenesis+ko00020//Citrate cycle (TCA cycle)+ko00280//Valine, leucine and isoleucine degradation+ko00640//Propanoate metabolism+ko01100//Metabolic pathways+ko01110//Biosynthesis of secondary metabolites+ko00260//Glycine, serine and threonine metabolism+ko00620//Pyruvate metabolism+ko01200//Carbon metabolism+ko00630//G…	Pyridine nucleotide-disulphide oxidoreductase	XM_009038694.1 Aureococcus anophagefferens mercuric reductase (MER1), partial mRNA	mercuric reductase [Ectocarpus siliculosus]	[C] KOG1335 Dihydrolipoamide dehydrogenase	Leghemoglobin reductase OS=Vigna unguiculata GN=FLBR PE=1 SV=1	GO:0009055//electron transfer activity;GO:0005623//cell;GO:0050660//flavin adenine dinucleotide binding;GO:0016021//integral component of membrane;GO:0016668//oxidoreductase activity, acting on a sulfur group of donors, NAD(P) as acceptor;GO:0045454//cell redox homeostasis;GO:0016491//oxidoreductase activity
CL5509.Contig1_All	1508	ko01100//Metabolic pathways;ko01212//Fatty acid metabolism;ko00072//Synthesis and degradation of ketone bodies;ko00280//Valine, leucine and isoleucine degradation;ko00310//Lysine degradation;ko00620//Pyruvate metabolism;ko00071//Fatty acid degradation;ko00630//Glyoxylate and dicarboxylate metabolism;ko01200//Carbon metabolism;ko01110//Biosynthesis of secondary metabolites;ko00640//Propanoate meta…	Metabolism	Global and overview maps;Metabolism of terpenoids and polyketides;Lipid metabolism;Amino acid metabolism;Carbohydrate metabolism	-1.16635	1.50892e-34	2.65302e-35	K00626//acetyl-CoA C-acetyltransferase [EC:2.3.1.9]+ko00310//Lysine degradation+ko00380//Tryptophan metabolism+ko00900//Terpenoid backbone biosynthesis+ko00280//Valine, leucine and isoleucine degradation+ko00640//Propanoate metabolism+ko01100//Metabolic pathways+ko00650//Butanoate metabolism+ko01110//Biosynthesis of secondary metabolites+ko01212//Fatty acid metabolism+ko00071//Fatty acid degradat…	Thiolase, N-terminal domain		beta-ketoacyl-CoA thiolase [Nannochloropsis gaditana CCMP526] >EKU22248.1 beta-ketoacyl-CoA thiolase [Nannochloropsis gaditana CCMP526] >EWM29392.1 3-ketoacyl- mitochondrial [Nannochloropsis gaditana]	[I] KOG1391 Acetyl-CoA acetyltransferase	Acetyl-CoA acetyltransferase, cytosolic 1 OS=Arabidopsis thaliana GN=AAT1 PE=2 SV=1	GO:0006635//fatty acid beta-oxidation;GO:0008152//metabolic process;GO:0003988//acetyl-CoA C-acyltransferase activity;GO:0016747//transferase activity, transferring acyl groups other than amino-acyl groups;GO:0005739//mitochondrion
CL3547.Contig3_All	1386	ko00072//Synthesis and degradation of ketone bodies;ko01200//Carbon metabolism;ko00071//Fatty acid degradation;ko00280//Valine, leucine and isoleucine degradation;ko00630//Glyoxylate and dicarboxylate metabolism;ko00380//Tryptophan metabolism;ko00310//Lysine degradation;ko00640//Propanoate metabolism;ko01100//Metabolic pathways;ko00650//Butanoate metabolism;ko00900//Terpenoid backbone biosynthesi…	Metabolism	Carbohydrate metabolism;Amino acid metabolism;Global and overview maps;Lipid metabolism;Metabolism of terpenoids and polyketides	-1.21025	0.000227572	0.000157463	K00626//acetyl-CoA C-acetyltransferase [EC:2.3.1.9]+ko00310//Lysine degradation+ko00380//Tryptophan metabolism+ko00900//Terpenoid backbone biosynthesis+ko00280//Valine, leucine and isoleucine degradation+ko00640//Propanoate metabolism+ko01100//Metabolic pathways+ko00650//Butanoate metabolism+ko01110//Biosynthesis of secondary metabolites+ko01212//Fatty acid metabolism+ko00071//Fatty acid degradat…	Thiolase, N-terminal domain		Acetyl-CoA acetyltransferase [Symbiodinium microadriaticum]	[I] KOG1390 Acetyl-CoA acetyltransferase	Acetyl-CoA acetyltransferase, cytosolic 1 OS=Arabidopsis thaliana GN=AAT1 PE=2 SV=1	GO:0008152//metabolic process;GO:0016747//transferase activity, transferring acyl groups other than amino-acyl groups
CL10502.Contig2_All	1732	ko01200//Carbon metabolism;ko00010//Glycolysis / Gluconeogenesis;ko01100//Metabolic pathways;ko01110//Biosynthesis of secondary metabolites;ko00020//Citrate cycle (TCA cycle);ko00620//Pyruvate metabolism	Metabolism	Global and overview maps;Carbohydrate metabolism	-1.22293	7.62321e-236	3.21514e-237	K00161//pyruvate dehydrogenase E1 component alpha subunit [EC:1.2.4.1]+ko00010//Glycolysis / Gluconeogenesis+ko00020//Citrate cycle (TCA cycle)+ko01100//Metabolic pathways+ko01110//Biosynthesis of secondary metabolites+ko00620//Pyruvate metabolism+ko01200//Carbon metabolism;K00161//pyruvate dehydrogenase E1 component alpha subunit [EC:1.2.4.1]+ko00010//Glycolysis / Gluconeogenesis+ko00020//Citrat…	Dehydrogenase E1 component	XM_009037186.1 Aureococcus anophagefferens hypothetical protein mRNA	pyruvate dehydrogenase e1 component alpha subunit [Nannochloropsis gaditana]	[C] KOG0225 Pyruvate dehydrogenase E1, alpha subunit	Pyruvate dehydrogenase E1 component subunit alpha-2, mitochondrial OS=Arabidopsis thaliana GN=IAR4 PE=1 SV=2	GO:0043231//intracellular membrane-bounded organelle;GO:0004739//pyruvate dehydrogenase (acetyl-transferring) activity;GO:0006086//acetyl-CoA biosynthetic process from pyruvate
Unigene37028_All	3548	ko01100//Metabolic pathways;ko00620//Pyruvate metabolism;ko00710//Carbon fixation in photosynthetic organisms;ko01200//Carbon metabolism	Metabolism	Carbohydrate metabolism;Energy metabolism;Global and overview maps	-1.26635	2.93907e-12	1.03363e-12	K00028//malate dehydrogenase (decarboxylating) [EC:1.1.1.39]+ko01100//Metabolic pathways+ko00710//Carbon fixation in photosynthetic organisms+ko00620//Pyruvate metabolism+ko01200//Carbon metabolism;K00028//malate dehydrogenase (decarboxylating) [EC:1.1.1.39]+ko01100//Metabolic pathways+ko00710//Carbon fixation in photosynthetic organisms+ko00620//Pyruvate metabolism+ko01200//Carbon metabolism;K00…	Phosphate acetyl/butaryl transferase		malate dehydrogenase (oxaloacetate-decarboxylating)(NADP+) [Monoraphidium neglectum] >KIY92252.1 malate dehydrogenase (oxaloacetate-decarboxylating)(NADP+) [Monoraphidium neglectum]	[C] KOG1257 NADP+-dependent malic enzyme	NADP-dependent malic enzyme, chloroplastic OS=Zea mays GN=MOD1 PE=1 SV=1	GO:0008948//oxaloacetate decarboxylase activity;GO:0004473//malate dehydrogenase (decarboxylating) (NADP+) activity;GO:0004471//malate dehydrogenase (decarboxylating) (NAD+) activity;GO:0051287//NAD binding
Unigene25818_All	1513	ko00640//Propanoate metabolism;ko00280//Valine, leucine and isoleucine degradation;ko00260//Glycine, serine and threonine metabolism;ko01110//Biosynthesis of secondary metabolites;ko00010//Glycolysis / Gluconeogenesis;ko00620//Pyruvate metabolism;ko01200//Carbon metabolism;ko00020//Citrate cycle (TCA cycle);ko01100//Metabolic pathways;ko00630//Glyoxylate and dicarboxylate metabolism	Metabolism	Global and overview maps;Carbohydrate metabolism;Amino acid metabolism	-1.31125	1.64996e-08	7.36698e-09	K00382//dihydrolipoamide dehydrogenase [EC:1.8.1.4]+ko00010//Glycolysis / Gluconeogenesis+ko00020//Citrate cycle (TCA cycle)+ko00280//Valine, leucine and isoleucine degradation+ko00640//Propanoate metabolism+ko01100//Metabolic pathways+ko01110//Biosynthesis of secondary metabolites+ko00260//Glycine, serine and threonine metabolism+ko00620//Pyruvate metabolism+ko01200//Carbon metabolism+ko00630//G…	Pyridine nucleotide-disulphide oxidoreductase		PREDICTED: dihydrolipoyl dehydrogenase, mitochondrial [Erythranthe guttata] >EYU33082.1 hypothetical protein MIMGU_mgv1a004880mg [Erythranthe guttata]	[C] KOG1335 Dihydrolipoamide dehydrogenase	Dihydrolipoyl dehydrogenase 2, mitochondrial OS=Arabidopsis thaliana GN=LPD2 PE=1 SV=1	GO:0009055//electron transfer activity;GO:0004148//dihydrolipoyl dehydrogenase activity;GO:0005623//cell;GO:0050660//flavin adenine dinucleotide binding;GO:0045454//cell redox homeostasis
CL5509.Contig2_All	1575	ko01200//Carbon metabolism;ko01110//Biosynthesis of secondary metabolites;ko00620//Pyruvate metabolism;ko00640//Propanoate metabolism;ko00280//Valine, leucine and isoleucine degradation;ko00071//Fatty acid degradation;ko00650//Butanoate metabolism;ko01100//Metabolic pathways;ko00310//Lysine degradation;ko00072//Synthesis and degradation of ketone bodies;ko00380//Tryptophan metabolism;ko00630//Gly…	Metabolism	Carbohydrate metabolism;Amino acid metabolism;Lipid metabolism;Metabolism of terpenoids and polyketides;Global and overview maps	-1.3292	5.35717e-38	8.76618e-39	K00626//acetyl-CoA C-acetyltransferase [EC:2.3.1.9]+ko00310//Lysine degradation+ko00380//Tryptophan metabolism+ko00900//Terpenoid backbone biosynthesis+ko00280//Valine, leucine and isoleucine degradation+ko00640//Propanoate metabolism+ko01100//Metabolic pathways+ko00650//Butanoate metabolism+ko01110//Biosynthesis of secondary metabolites+ko01212//Fatty acid metabolism+ko00071//Fatty acid degradat…	Thiolase, N-terminal domain		beta-ketoacyl-CoA thiolase [Nannochloropsis gaditana CCMP526] >EKU22248.1 beta-ketoacyl-CoA thiolase [Nannochloropsis gaditana CCMP526] >EWM29392.1 3-ketoacyl- mitochondrial [Nannochloropsis gaditana]	[I] KOG1391 Acetyl-CoA acetyltransferase	Acetyl-CoA acetyltransferase, cytosolic 1 OS=Arabidopsis thaliana GN=AAT1 PE=2 SV=1	GO:0006635//fatty acid beta-oxidation;GO:0008152//metabolic process;GO:0003988//acetyl-CoA C-acyltransferase activity;GO:0016747//transferase activity, transferring acyl groups other than amino-acyl groups;GO:0005739//mitochondrion
CL4608.Contig2_All	1341	ko01100//Metabolic pathways;ko00290//Valine, leucine and isoleucine biosynthesis;ko01110//Biosynthesis of secondary metabolites;ko01230//Biosynthesis of amino acids;ko00620//Pyruvate metabolism;ko01210//2-Oxocarboxylic acid metabolism	Metabolism	Amino acid metabolism;Global and overview maps;Carbohydrate metabolism	-1.36909	9.87464e-19	2.61937e-19	K01649//2-isopropylmalate synthase [EC:2.3.3.13]+ko00290//Valine, leucine and isoleucine biosynthesis+ko01230//Biosynthesis of amino acids+ko01100//Metabolic pathways+ko01110//Biosynthesis of secondary metabolites+ko01210//2-Oxocarboxylic acid metabolism+ko00620//Pyruvate metabolism;K01649//2-isopropylmalate synthase [EC:2.3.3.13]+ko00290//Valine, leucine and isoleucine biosynthesis+ko01230//Bios…	HMGL-like	XM_002508674.1 Micromonas commoda 2-isopropylmalate synthase partial mRNA	2-isopropylmalate synthase [Nannochloropsis gaditana]	[E] KOG2367 Alpha-isopropylmalate synthase/homocitrate synthase	2-isopropylmalate synthase 2, chloroplastic OS=Arabidopsis thaliana GN=IPMS2 PE=1 SV=1	GO:0009098//leucine biosynthetic process;GO:0003852//2-isopropylmalate synthase activity
Unigene33393_All	1247	ko00620//Pyruvate metabolism;ko01110//Biosynthesis of secondary metabolites;ko01200//Carbon metabolism;ko01100//Metabolic pathways;ko00020//Citrate cycle (TCA cycle)	Metabolism	Global and overview maps;Carbohydrate metabolism	-1.37001	8.73655e-08	4.13136e-08	K01679//fumarate hydratase, class II [EC:4.2.1.2]+ko00020//Citrate cycle (TCA cycle)+ko01100//Metabolic pathways+ko01110//Biosynthesis of secondary metabolites+ko00620//Pyruvate metabolism+ko01200//Carbon metabolism;K01679//fumarate hydratase, class II [EC:4.2.1.2]+ko00020//Citrate cycle (TCA cycle)+ko01100//Metabolic pathways+ko01110//Biosynthesis of secondary metabolites+ko00620//Pyruvate metab…	Lyase		fumarate hydratase class II [Aphanomyces invadans] >ETV92442.1 fumarate hydratase class II [Aphanomyces invadans]	[C] KOG1317 Fumarase	Fumarate hydratase 1, mitochondrial OS=Arabidopsis thaliana GN=FUM1 PE=1 SV=2	GO:0006099//tricarboxylic acid cycle;GO:0045239//tricarboxylic acid cycle enzyme complex;GO:0006106//fumarate metabolic process;GO:0004333//fumarate hydratase activity
Unigene496_All	998	ko00020//Citrate cycle (TCA cycle);ko00010//Glycolysis / Gluconeogenesis;ko01100//Metabolic pathways;ko00620//Pyruvate metabolism;ko01110//Biosynthesis of secondary metabolites;ko01200//Carbon metabolism	Metabolism	Global and overview maps;Carbohydrate metabolism	-1.38305	3.04736e-35	5.27459e-36	K10799//tankyrase [EC:2.4.2.30];K00627//pyruvate dehydrogenase E2 component (dihydrolipoamide acetyltransferase) [EC:2.3.1.12]+ko00010//Glycolysis / Gluconeogenesis+ko00020//Citrate cycle (TCA cycle)+ko01100//Metabolic pathways+ko01110//Biosynthesis of secondary metabolites+ko00620//Pyruvate metabolism+ko01200//Carbon metabolism;K00627//pyruvate dehydrogenase E2 component (dihydrolipoamide acetyl…	Tetratricopeptide repeat		hypothetical protein BU14_0066s0031 [Porphyra umbilicalis]	[TZ] KOG3671 Actin regulatory protein (Wiskott-Aldrich syndrome protein)	Formin-like protein 3 OS=Oryza sativa subsp. japonica GN=FH3 PE=2 SV=2
CL7257.Contig3_All	2802	ko01200//Carbon metabolism;ko00710//Carbon fixation in photosynthetic organisms;ko00020//Citrate cycle (TCA cycle);ko01100//Metabolic pathways;ko00620//Pyruvate metabolism;ko00010//Glycolysis / Gluconeogenesis;ko01110//Biosynthesis of secondary metabolites	Metabolism	Energy metabolism;Carbohydrate metabolism;Global and overview maps	-1.40821	0.000424406	0.000306487	K01610//phosphoenolpyruvate carboxykinase (ATP) [EC:4.1.1.49]+ko00010//Glycolysis / Gluconeogenesis+ko00020//Citrate cycle (TCA cycle)+ko01100//Metabolic pathways+ko01110//Biosynthesis of secondary metabolites+ko00710//Carbon fixation in photosynthetic organisms+ko00620//Pyruvate metabolism+ko01200//Carbon metabolism;K01610//phosphoenolpyruvate carboxykinase (ATP) [EC:4.1.1.49]+ko00010//Glycolysi…	Phosphoenolpyruvate carboxykinase		phosphoenolpyruvate carboxykinase [Nannochloropsis gaditana]	[C] TWOG0797 Phosphoenolpyruvate carboxykinase (ATP)	Phosphoenolpyruvate carboxykinase (ATP) OS=Arabidopsis thaliana GN=PCKA PE=1 SV=1	GO:0005524//ATP binding;GO:0006094//gluconeogenesis;GO:0016301//kinase activity;GO:0005829//cytosol;GO:0004612//phosphoenolpyruvate carboxykinase (ATP) activity
Unigene76175_All	7496	ko01100//Metabolic pathways;ko01110//Biosynthesis of secondary metabolites;ko01212//Fatty acid metabolism;ko00061//Fatty acid biosynthesis;ko00640//Propanoate metabolism;ko00620//Pyruvate metabolism	Metabolism	Global and overview maps;Lipid metabolism;Carbohydrate metabolism	-1.43826	0	0	K11262//acetyl-CoA carboxylase / biotin carboxylase 1 [EC:6.4.1.2 6.3.4.14 2.1.3.15]+ko00640//Propanoate metabolism+ko01100//Metabolic pathways+ko01110//Biosynthesis of secondary metabolites+ko00061//Fatty acid biosynthesis+ko01212//Fatty acid metabolism+ko00620//Pyruvate metabolism;K11262//acetyl-CoA carboxylase / biotin carboxylase 1 [EC:6.4.1.2 6.3.4.14 2.1.3.15]+ko00640//Propanoate metabolism…	Carboxyl transferase domain		acetyl-CoA carboxylase, partial [Nannochloropsis oculata]	[I] KOG0368 Acetyl-CoA carboxylase	Acetyl-CoA carboxylase 1 OS=Oryza sativa subsp. japonica GN=ACC1 PE=3 SV=1	GO:0005319//lipid transporter activity;GO:0003989//acetyl-CoA carboxylase activity;GO:0046872//metal ion binding;GO:0004075//biotin carboxylase activity;GO:0005524//ATP binding;GO:0006633//fatty acid biosynthetic process
CL11339.Contig1_All	6296	ko00620//Pyruvate metabolism;ko01210//2-Oxocarboxylic acid metabolism;ko00290//Valine, leucine and isoleucine biosynthesis;ko01230//Biosynthesis of amino acids;ko01100//Metabolic pathways;ko01110//Biosynthesis of secondary metabolites	Metabolism	Global and overview maps;Amino acid metabolism;Carbohydrate metabolism	-1.44261	3.86525e-150	2.35317e-151	K01649//2-isopropylmalate synthase [EC:2.3.3.13]+ko00290//Valine, leucine and isoleucine biosynthesis+ko01230//Biosynthesis of amino acids+ko01100//Metabolic pathways+ko01110//Biosynthesis of secondary metabolites+ko01210//2-Oxocarboxylic acid metabolism+ko00620//Pyruvate metabolism;K01649//2-isopropylmalate synthase [EC:2.3.3.13]+ko00290//Valine, leucine and isoleucine biosynthesis+ko01230//Bios…	HMGL-like		2-Isopropylmalate synthase [Ectocarpus siliculosus]	[E] KOG2367 Alpha-isopropylmalate synthase/homocitrate synthase	Vegetative cell wall protein gp1 OS=Chlamydomonas reinhardtii GN=GP1 PE=1 SV=1	GO:0009098//leucine biosynthetic process;GO:0003852//2-isopropylmalate synthase activity
Unigene33083_All	5035	ko01100//Metabolic pathways;ko01212//Fatty acid metabolism;ko00640//Propanoate metabolism;ko01200//Carbon metabolism;ko01110//Biosynthesis of secondary metabolites;ko00061//Fatty acid biosynthesis;ko00620//Pyruvate metabolism	Metabolism	Lipid metabolism;Carbohydrate metabolism;Global and overview maps	-1.44339	4.75658e-91	4.14904e-92	K01961//acetyl-CoA carboxylase, biotin carboxylase subunit [EC:6.4.1.2 6.3.4.14]+ko00640//Propanoate metabolism+ko01100//Metabolic pathways+ko01110//Biosynthesis of secondary metabolites+ko00061//Fatty acid biosynthesis+ko01212//Fatty acid metabolism+ko00620//Pyruvate metabolism+ko01200//Carbon metabolism;K01961//acetyl-CoA carboxylase, biotin carboxylase subunit [EC:6.4.1.2 6.3.4.14]+ko00640//Pr…	Pyridoxal phosphate biosynthetic protein PdxA		acetyl-CoA carboxylase (plastid) [Paulinella micropora] >AQX45196.1 acetyl-CoA carboxylase (plastid) [Paulinella micropora]	[IE] KOG0238 3-Methylcrotonyl-CoA carboxylase, biotin-containing subunit/Propionyl-CoA carboxylase, alpha chain/Acetyl-CoA carboxylase, biotin carboxylase subunit	Biotin carboxylase 1, chloroplastic OS=Populus trichocarpa GN=POPTRDRAFT_831870 PE=2 SV=1	GO:0003989//acetyl-CoA carboxylase activity;GO:0004075//biotin carboxylase activity;GO:0005524//ATP binding;GO:0046872//metal ion binding;GO:0009536//plastid;GO:0009941//chloroplast envelope;GO:0006633//fatty acid biosynthetic process;GO:0009570//chloroplast stroma
CL10724.Contig1_All	1154	ko00620//Pyruvate metabolism	Metabolism	Carbohydrate metabolism	-1.50985	4.22418e-22	9.9945e-23	K18881//D-lactate dehydratase [EC:4.2.1.130]+ko00620//Pyruvate metabolism;K18881//D-lactate dehydratase [EC:4.2.1.130]+ko00620//Pyruvate metabolism;K18881//D-lactate dehydratase [EC:4.2.1.130]+ko00620//Pyruvate metabolism		XM_015715456.1 PREDICTED: Ricinus communis zinc finger protein CONSTANS-LIKE 14 (LOC8285284), mRNA	predicted protein [Physcomitrella patens] >EDQ63138.1 predicted protein [Physcomitrella patens]	[RV] KOG2764 Putative transcriptional regulator DJ-1	Protein DJ-1 homolog D OS=Arabidopsis thaliana GN=DJ1D PE=1 SV=1	GO:0019172//glyoxalase III activity
CL553.Contig5_All	1104	ko03013//RNA transport;ko03015//mRNA surveillance pathway;ko00620//Pyruvate metabolism	Genetic Information Processing;Metabolism	Translation;Carbohydrate metabolism	-1.53456	6.61243e-06	3.74691e-06	K03778//D-lactate dehydrogenase [EC:1.1.1.28]+ko00620//Pyruvate metabolism;K03778//D-lactate dehydrogenase [EC:1.1.1.28]+ko00620//Pyruvate metabolism;K14325//RNA-binding protein with serine-rich domain 1+ko03015//mRNA surveillance pathway+ko03013//RNA transport;K14325//RNA-binding protein with serine-rich domain 1+ko03015//mRNA surveillance pathway+ko03013//RNA transport	D-isomer specific 2-hydroxyacid dehydrogenase, catalytic domain		D-Lactate dehydrogenase [Micromonas commoda] >ACO60678.1 D-Lactate dehydrogenase [Micromonas commoda]	[E] KOG0068 D-3-phosphoglycerate dehydrogenase, D-isomer-specific 2-hydroxy acid dehydrogenase superfamily	D-3-phosphoglycerate dehydrogenase 2, chloroplastic OS=Arabidopsis thaliana GN=PGDH2 PE=1 SV=2	GO:0016616//oxidoreductase activity, acting on the CH-OH group of donors, NAD or NADP as acceptor;GO:0051287//NAD binding
Unigene22917_All	2551	ko00290//Valine, leucine and isoleucine biosynthesis;ko01110//Biosynthesis of secondary metabolites;ko01100//Metabolic pathways;ko01230//Biosynthesis of amino acids;ko01210//2-Oxocarboxylic acid metabolism;ko00620//Pyruvate metabolism	Metabolism	Global and overview maps;Amino acid metabolism;Carbohydrate metabolism	-1.53952	2.41877e-203	1.14175e-204	K01649//2-isopropylmalate synthase [EC:2.3.3.13]+ko00290//Valine, leucine and isoleucine biosynthesis+ko01230//Biosynthesis of amino acids+ko01100//Metabolic pathways+ko01110//Biosynthesis of secondary metabolites+ko01210//2-Oxocarboxylic acid metabolism+ko00620//Pyruvate metabolism;K01649//2-isopropylmalate synthase [EC:2.3.3.13]+ko00290//Valine, leucine and isoleucine biosynthesis+ko01230//Bios…	HMGL-like		2-Isopropylmalate synthase [Ectocarpus siliculosus]	[E] KOG2367 Alpha-isopropylmalate synthase/homocitrate synthase	Vegetative cell wall protein gp1 OS=Chlamydomonas reinhardtii GN=GP1 PE=1 SV=1	GO:0009098//leucine biosynthetic process;GO:0003852//2-isopropylmalate synthase activity
CL9215.Contig2_All	1888	ko00620//Pyruvate metabolism;ko01200//Carbon metabolism;ko00010//Glycolysis / Gluconeogenesis;ko00640//Propanoate metabolism;ko00630//Glyoxylate and dicarboxylate metabolism;ko01110//Biosynthesis of secondary metabolites;ko01100//Metabolic pathways	Metabolism	Carbohydrate metabolism;Global and overview maps	-1.64366	3.11053e-15	9.50852e-16	K01895//acetyl-CoA synthetase [EC:6.2.1.1]+ko00010//Glycolysis / Gluconeogenesis+ko00640//Propanoate metabolism+ko01100//Metabolic pathways+ko01110//Biosynthesis of secondary metabolites+ko00620//Pyruvate metabolism+ko01200//Carbon metabolism+ko00630//Glyoxylate and dicarboxylate metabolism;K01895//acetyl-CoA synthetase [EC:6.2.1.1]+ko00010//Glycolysis / Gluconeogenesis+ko00640//Propanoate metabo…	AMP-binding enzyme	XM_005771870.1 Emiliania huxleyi CCMP1516 acetyl-CoA synthetase partial mRNA	AMP-dependent synthetase and ligase [Fragilariopsis cylindrus CCMP1102]	[I] KOG1175 Acyl-CoA synthetase	Acetyl-coenzyme A synthetase, chloroplastic/glyoxysomal OS=Arabidopsis thaliana GN=ACS PE=1 SV=1	GO:0008152//metabolic process;GO:0003824//catalytic activity
Unigene22078_All	1572	ko01100//Metabolic pathways;ko00310//Lysine degradation;ko01110//Biosynthesis of secondary metabolites;ko00620//Pyruvate metabolism;ko00010//Glycolysis / Gluconeogenesis;ko00020//Citrate cycle (TCA cycle);ko01200//Carbon metabolism	Metabolism	Global and overview maps;Carbohydrate metabolism;Amino acid metabolism	-1.67708	1.35708e-26	2.85141e-27	K00627//pyruvate dehydrogenase E2 component (dihydrolipoamide acetyltransferase) [EC:2.3.1.12]+ko00010//Glycolysis / Gluconeogenesis+ko00020//Citrate cycle (TCA cycle)+ko01100//Metabolic pathways+ko01110//Biosynthesis of secondary metabolites+ko00620//Pyruvate metabolism+ko01200//Carbon metabolism;K00627//pyruvate dehydrogenase E2 component (dihydrolipoamide acetyltransferase) [EC:2.3.1.12]+ko000…	2-oxoacid dehydrogenases acyltransferase (catalytic domain)		hypothetical protein L917_15989 [Phytophthora parasitica]	[C] KOG0558 Dihydrolipoamide transacylase (alpha-keto acid dehydrogenase E2 subunit)	Dihydrolipoyllysine-residue acetyltransferase component 2 of pyruvate dehydrogenase complex, mitochondrial OS=Arabidopsis thaliana GN=At3g13930 PE=1 SV=2
Unigene22020_All	1596	ko00280//Valine, leucine and isoleucine degradation;ko00071//Fatty acid degradation;ko00330//Arginine and proline metabolism;ko00561//Glycerolipid metabolism;ko00903//Limonene and pinene degradation;ko00410//beta-Alanine metabolism;ko00940//Phenylpropanoid biosynthesis;ko01110//Biosynthesis of secondary metabolites;ko00053//Ascorbate and aldarate metabolism;ko01100//Metabolic pathways;ko00310//Ly…	Metabolism	Biosynthesis of other secondary metabolites;Metabolism of terpenoids and polyketides;Amino acid metabolism;Carbohydrate metabolism;Lipid metabolism;Metabolism of other amino acids;Global and overview maps	-1.68517	2.37735e-14	7.55895e-15	K00294//1-pyrroline-5-carboxylate dehydrogenase [EC:1.2.1.88]+ko00250//Alanine, aspartate and glutamate metabolism+ko00330//Arginine and proline metabolism+ko01100//Metabolic pathways;K00294//1-pyrroline-5-carboxylate dehydrogenase [EC:1.2.1.88]+ko00250//Alanine, aspartate and glutamate metabolism+ko00330//Arginine and proline metabolism+ko01100//Metabolic pathways;K12355//coniferyl-aldehyde dehy…	Aldehyde dehydrogenase family		1-pyrroline-5-carboxylate dehydrogenase [Galdieria sulphuraria] >EME28745.1 1-pyrroline-5-carboxylate dehydrogenase [Galdieria sulphuraria]	[E] KOG2455 Delta-1-pyrroline-5-carboxylate dehydrogenase	Betaine aldehyde dehydrogenase 2 OS=Oryza sativa subsp. japonica GN=BADH2 PE=1 SV=1	GO:0004657//proline dehydrogenase activity;GO:0010133//proline catabolic process to glutamate;GO:0003700//DNA binding transcription factor activity;GO:0003842//1-pyrroline-5-carboxylate dehydrogenase activity;GO:0004029//aldehyde dehydrogenase (NAD) activity
CL5915.Contig2_All	1530	ko00620//Pyruvate metabolism	Metabolism	Carbohydrate metabolism	-1.72035	0	0	K18881//D-lactate dehydratase [EC:4.2.1.130]+ko00620//Pyruvate metabolism;K18881//D-lactate dehydratase [EC:4.2.1.130]+ko00620//Pyruvate metabolism;K18881//D-lactate dehydratase [EC:4.2.1.130]+ko00620//Pyruvate metabolism	DJ-1/PfpI family		predicted protein [Physcomitrella patens] >EDQ63138.1 predicted protein [Physcomitrella patens]	[RV] KOG2764 Putative transcriptional regulator DJ-1	Protein DJ-1 homolog D OS=Arabidopsis thaliana GN=DJ1D PE=1 SV=1	GO:0019172//glyoxalase III activity
CL2608.Contig2_All	2898	ko01100//Metabolic pathways;ko01110//Biosynthesis of secondary metabolites;ko00280//Valine, leucine and isoleucine degradation;ko00260//Glycine, serine and threonine metabolism;ko00640//Propanoate metabolism;ko00010//Glycolysis / Gluconeogenesis;ko01200//Carbon metabolism;ko00630//Glyoxylate and dicarboxylate metabolism;ko00020//Citrate cycle (TCA cycle);ko00620//Pyruvate metabolism	Metabolism	Amino acid metabolism;Carbohydrate metabolism;Global and overview maps	-1.77532	3.89437e-23	8.94317e-24	K00382//dihydrolipoamide dehydrogenase [EC:1.8.1.4]+ko00010//Glycolysis / Gluconeogenesis+ko00020//Citrate cycle (TCA cycle)+ko00280//Valine, leucine and isoleucine degradation+ko00640//Propanoate metabolism+ko01100//Metabolic pathways+ko01110//Biosynthesis of secondary metabolites+ko00260//Glycine, serine and threonine metabolism+ko00620//Pyruvate metabolism+ko01200//Carbon metabolism+ko00630//G…	Protein of unknown function (DUF1572)		hypothetical protein TSUD_199460 [Trifolium subterraneum]	[C] KOG1335 Dihydrolipoamide dehydrogenase	Dihydrolipoyl dehydrogenase, mitochondrial OS=Pisum sativum GN=LPD PE=1 SV=2	GO:0009055//electron transfer activity;GO:0005759//mitochondrial matrix;GO:0004148//dihydrolipoyl dehydrogenase activity;GO:0048046//apoplast;GO:0005524//ATP binding;GO:0050660//flavin adenine dinucleotide binding;GO:0045454//cell redox homeostasis;GO:0050897//cobalt ion binding;GO:0046686//response to cadmium ion;GO:0005747//mitochondrial respiratory chain complex I;GO:0005623//cell;GO:0005507//…
Unigene41150_All	1068	ko00620//Pyruvate metabolism;ko00640//Propanoate metabolism;ko00061//Fatty acid biosynthesis;ko01200//Carbon metabolism;ko01212//Fatty acid metabolism;ko01100//Metabolic pathways;ko01110//Biosynthesis of secondary metabolites	Metabolism	Global and overview maps;Carbohydrate metabolism;Lipid metabolism	-1.82582	7.61717e-14	2.47601e-14	K01962//acetyl-CoA carboxylase carboxyl transferase subunit alpha [EC:6.4.1.2 2.1.3.15]+ko00640//Propanoate metabolism+ko01100//Metabolic pathways+ko01110//Biosynthesis of secondary metabolites+ko00061//Fatty acid biosynthesis+ko01212//Fatty acid metabolism+ko00620//Pyruvate metabolism+ko01200//Carbon metabolism;K01962//acetyl-CoA carboxylase carboxyl transferase subunit alpha [EC:6.4.1.2 2.1.3.1…	Acetyl co-enzyme A carboxylase carboxyltransferase alpha subunit		hypothetical protein SELMODRAFT_162780, partial [Selaginella moellendorffii] >EFJ05885.1 hypothetical protein SELMODRAFT_162780, partial [Selaginella moellendorffii]		Acetyl-coenzyme A carboxylase carboxyl transferase subunit alpha, chloroplastic OS=Arabidopsis thaliana GN=CAC3 PE=1 SV=1	GO:0003989//acetyl-CoA carboxylase activity;GO:0003887//DNA-directed DNA polymerase activity;GO:0006281//DNA repair;GO:0003684//damaged DNA binding;GO:0009317//acetyl-CoA carboxylase complex;GO:0006633//fatty acid biosynthetic process;GO:0010224//response to UV-B
CL636.Contig2_All	1107	ko00620//Pyruvate metabolism;ko00910//Nitrogen metabolism;ko00010//Glycolysis / Gluconeogenesis;ko00020//Citrate cycle (TCA cycle);ko01100//Metabolic pathways;ko01200//Carbon metabolism;ko01110//Biosynthesis of secondary metabolites	Metabolism	Carbohydrate metabolism;Energy metabolism;Global and overview maps	-1.84486	0.0002321	0.000160769	K00627//pyruvate dehydrogenase E2 component (dihydrolipoamide acetyltransferase) [EC:2.3.1.12]+ko00010//Glycolysis / Gluconeogenesis+ko00020//Citrate cycle (TCA cycle)+ko01100//Metabolic pathways+ko01110//Biosynthesis of secondary metabolites+ko00620//Pyruvate metabolism+ko01200//Carbon metabolism;K00627//pyruvate dehydrogenase E2 component (dihydrolipoamide acetyltransferase) [EC:2.3.1.12]+ko000…	Biotin-requiring enzyme		Cap-specific mRNA (nucleoside-2'-O-)-methyltransferase 1 [Symbiodinium microadriaticum]	[T] KOG4743 Cyclin-dependent kinase inhibitor	Myrosinase-binding protein 2 OS=Arabidopsis thaliana GN=MBP2 PE=2 SV=1	GO:0005524//ATP binding;GO:0004672//protein kinase activity
Unigene18189_All	2407	ko01100//Metabolic pathways;ko00020//Citrate cycle (TCA cycle);ko01110//Biosynthesis of secondary metabolites;ko00620//Pyruvate metabolism;ko01200//Carbon metabolism	Metabolism	Carbohydrate metabolism;Global and overview maps	-1.86808	2.00851e-78	1.94749e-79	K01676//fumarate hydratase, class I [EC:4.2.1.2]+ko00020//Citrate cycle (TCA cycle)+ko01100//Metabolic pathways+ko01110//Biosynthesis of secondary metabolites+ko00620//Pyruvate metabolism+ko01200//Carbon metabolism;K01676//fumarate hydratase, class I [EC:4.2.1.2]+ko00020//Citrate cycle (TCA cycle)+ko01100//Metabolic pathways+ko01110//Biosynthesis of secondary metabolites+ko00620//Pyruvate metabol…	Fumarase C-terminus	XM_001696582.1 Chlamydomonas reinhardtii fumarate hydratase (FUM1), mRNA	fumarate hydratase [Nannochloropsis gaditana]	[AR] KOG2146 Splicing coactivator SRm160/300, subunit SRm160 (contains PWI domain)	Lysine-rich arabinogalactan protein 19 OS=Arabidopsis thaliana GN=AGP19 PE=2 SV=2	GO:0006091//generation of precursor metabolites and energy;GO:0004333//fumarate hydratase activity
CL7257.Contig10_All	2552	ko01200//Carbon metabolism;ko00010//Glycolysis / Gluconeogenesis;ko00710//Carbon fixation in photosynthetic organisms;ko00020//Citrate cycle (TCA cycle);ko01110//Biosynthesis of secondary metabolites;ko01100//Metabolic pathways;ko00620//Pyruvate metabolism	Metabolism	Energy metabolism;Carbohydrate metabolism;Global and overview maps	-1.91368	0	0	K01610//phosphoenolpyruvate carboxykinase (ATP) [EC:4.1.1.49]+ko00010//Glycolysis / Gluconeogenesis+ko00020//Citrate cycle (TCA cycle)+ko01100//Metabolic pathways+ko01110//Biosynthesis of secondary metabolites+ko00710//Carbon fixation in photosynthetic organisms+ko00620//Pyruvate metabolism+ko01200//Carbon metabolism;K01610//phosphoenolpyruvate carboxykinase (ATP) [EC:4.1.1.49]+ko00010//Glycolysi…	Phosphoenolpyruvate carboxykinase		phosphoenolpyruvate carboxykinase [Nannochloropsis gaditana]	[C] TWOG0797 Phosphoenolpyruvate carboxykinase (ATP)	Phosphoenolpyruvate carboxykinase (ATP) OS=Arabidopsis thaliana GN=PCKA PE=1 SV=1	GO:0005524//ATP binding;GO:0006094//gluconeogenesis;GO:0016301//kinase activity;GO:0005829//cytosol;GO:0004612//phosphoenolpyruvate carboxykinase (ATP) activity
CL4597.Contig2_All	1507	ko01200//Carbon metabolism;ko00620//Pyruvate metabolism;ko00630//Glyoxylate and dicarboxylate metabolism;ko00710//Carbon fixation in photosynthetic organisms;ko01110//Biosynthesis of secondary metabolites;ko01100//Metabolic pathways;ko00020//Citrate cycle (TCA cycle);ko00270//Cysteine and methionine metabolism	Metabolism	Amino acid metabolism;Carbohydrate metabolism;Energy metabolism;Global and overview maps	-1.93003	1.48138e-18	3.95814e-19	K00026//malate dehydrogenase [EC:1.1.1.37]+ko00020//Citrate cycle (TCA cycle)+ko01100//Metabolic pathways+ko01110//Biosynthesis of secondary metabolites+ko00710//Carbon fixation in photosynthetic organisms+ko00620//Pyruvate metabolism+ko00270//Cysteine and methionine metabolism+ko01200//Carbon metabolism+ko00630//Glyoxylate and dicarboxylate metabolism;K00026//malate dehydrogenase [EC:1.1.1.37]+k…	lactate/malate dehydrogenase, alpha/beta C-terminal domain		malate dehydrogenase [Sargassum thunbergii]	[C] KOG1494 NAD-dependent malate dehydrogenase	Malate dehydrogenase, glyoxysomal OS=Oryza sativa subsp. japonica GN=Os12g0632700 PE=1 SV=3
Unigene3951_All	2576	ko01100//Metabolic pathways;ko01110//Biosynthesis of secondary metabolites;ko00010//Glycolysis / Gluconeogenesis;ko00020//Citrate cycle (TCA cycle);ko00620//Pyruvate metabolism;ko01200//Carbon metabolism	Metabolism	Carbohydrate metabolism;Global and overview maps	-1.98779	3.82292e-59	4.58099e-60	K00161//pyruvate dehydrogenase E1 component alpha subunit [EC:1.2.4.1]+ko00010//Glycolysis / Gluconeogenesis+ko00020//Citrate cycle (TCA cycle)+ko01100//Metabolic pathways+ko01110//Biosynthesis of secondary metabolites+ko00620//Pyruvate metabolism+ko01200//Carbon metabolism;K00161//pyruvate dehydrogenase E1 component alpha subunit [EC:1.2.4.1]+ko00010//Glycolysis / Gluconeogenesis+ko00020//Citrat…	Dehydrogenase E1 component	XM_009037186.1 Aureococcus anophagefferens hypothetical protein mRNA	pyruvate dehydrogenase e1 component alpha subunit [Nannochloropsis gaditana]	[C] KOG0225 Pyruvate dehydrogenase E1, alpha subunit	Pyruvate dehydrogenase E1 component subunit alpha-2, mitochondrial OS=Arabidopsis thaliana GN=IAR4 PE=1 SV=2	GO:0043231//intracellular membrane-bounded organelle;GO:0004739//pyruvate dehydrogenase (acetyl-transferring) activity;GO:0006086//acetyl-CoA biosynthetic process from pyruvate
Unigene4539_All	3242	ko00010//Glycolysis / Gluconeogenesis;ko00020//Citrate cycle (TCA cycle);ko00620//Pyruvate metabolism;ko01200//Carbon metabolism;ko01100//Metabolic pathways;ko01110//Biosynthesis of secondary metabolites	Metabolism	Carbohydrate metabolism;Global and overview maps	-2.0248	0	0	K00161//pyruvate dehydrogenase E1 component alpha subunit [EC:1.2.4.1]+ko00010//Glycolysis / Gluconeogenesis+ko00020//Citrate cycle (TCA cycle)+ko01100//Metabolic pathways+ko01110//Biosynthesis of secondary metabolites+ko00620//Pyruvate metabolism+ko01200//Carbon metabolism;K00161//pyruvate dehydrogenase E1 component alpha subunit [EC:1.2.4.1]+ko00010//Glycolysis / Gluconeogenesis+ko00020//Citrat…	Dehydrogenase E1 component	XM_009037186.1 Aureococcus anophagefferens hypothetical protein mRNA	pyruvate dehydrogenase e1 component alpha subunit [Nannochloropsis gaditana]	[C] KOG0225 Pyruvate dehydrogenase E1, alpha subunit	Pyruvate dehydrogenase E1 component subunit alpha-2, mitochondrial OS=Arabidopsis thaliana GN=IAR4 PE=1 SV=2	GO:0043231//intracellular membrane-bounded organelle;GO:0004739//pyruvate dehydrogenase (acetyl-transferring) activity;GO:0006086//acetyl-CoA biosynthetic process from pyruvate
Unigene40805_All	2455	ko01100//Metabolic pathways;ko01110//Biosynthesis of secondary metabolites;ko00020//Citrate cycle (TCA cycle);ko00620//Pyruvate metabolism;ko00010//Glycolysis / Gluconeogenesis;ko01200//Carbon metabolism	Metabolism	Carbohydrate metabolism;Global and overview maps	-2.12375	7.96505e-45	1.15534e-45	K00162//pyruvate dehydrogenase E1 component beta subunit [EC:1.2.4.1]+ko00010//Glycolysis / Gluconeogenesis+ko00020//Citrate cycle (TCA cycle)+ko01100//Metabolic pathways+ko01110//Biosynthesis of secondary metabolites+ko00620//Pyruvate metabolism+ko01200//Carbon metabolism;K00162//pyruvate dehydrogenase E1 component beta subunit [EC:1.2.4.1]+ko00010//Glycolysis / Gluconeogenesis+ko00020//Citrate …	Dehydrogenase E1 component		PREDICTED: pyruvate dehydrogenase E1 component subunit beta-like [Nelumbo nucifera]	[C] KOG0525 Branched chain alpha-keto acid dehydrogenase E1, beta subunit	Pyruvate dehydrogenase E1 component subunit beta-3, chloroplastic OS=Oryza sativa subsp. japonica GN=Os12g0616900 PE=2 SV=1	GO:0008152//metabolic process;GO:0003824//catalytic activity
Unigene45428_All	1621	ko00330//Arginine and proline metabolism;ko00620//Pyruvate metabolism;ko00053//Ascorbate and aldarate metabolism;ko00260//Glycine, serine and threonine metabolism;ko00410//beta-Alanine metabolism;ko01110//Biosynthesis of secondary metabolites;ko00340//Histidine metabolism;ko00380//Tryptophan metabolism;ko00280//Valine, leucine and isoleucine degradation;ko00310//Lysine degradation;ko00561//Glycer…	Metabolism	Global and overview maps;Lipid metabolism;Carbohydrate metabolism;Metabolism of other amino acids;Amino acid metabolism	-2.1823	3.34203e-24	7.44621e-25	K14085//aldehyde dehydrogenase family 7 member A1 [EC:1.2.1.31 1.2.1.8 1.2.1.3]+ko00410//beta-Alanine metabolism+ko00310//Lysine degradation+ko00010//Glycolysis / Gluconeogenesis+ko00380//Tryptophan metabolism+ko00330//Arginine and proline metabolism+ko00280//Valine, leucine and isoleucine degradation+ko01100//Metabolic pathways+ko00053//Ascorbate and aldarate metabolism+ko00340//Histidine metabo…	Aldehyde dehydrogenase family		aldehyde dehydrogenase (NAD+) [Galdieria sulphuraria] >EME27689.1 aldehyde dehydrogenase (NAD+) [Galdieria sulphuraria]	[C] KOG2453 Aldehyde dehydrogenase	Aldehyde dehydrogenase family 7 member A1 OS=Malus domestica PE=1 SV=3	GO:0005829//cytosol;GO:0009651//response to salt stress;GO:0009269//response to desiccation;GO:0009737//response to abscisic acid;GO:0004029//aldehyde dehydrogenase (NAD) activity
Unigene36954_All	8503	ko00620//Pyruvate metabolism;ko00010//Glycolysis / Gluconeogenesis;ko00020//Citrate cycle (TCA cycle);ko01200//Carbon metabolism;ko01100//Metabolic pathways;ko01110//Biosynthesis of secondary metabolites	Metabolism	Carbohydrate metabolism;Global and overview maps	-2.18687	4.29095e-205	2.01082e-206	K00627//pyruvate dehydrogenase E2 component (dihydrolipoamide acetyltransferase) [EC:2.3.1.12]+ko00010//Glycolysis / Gluconeogenesis+ko00020//Citrate cycle (TCA cycle)+ko01100//Metabolic pathways+ko01110//Biosynthesis of secondary metabolites+ko00620//Pyruvate metabolism+ko01200//Carbon metabolism;K00627//pyruvate dehydrogenase E2 component (dihydrolipoamide acetyltransferase) [EC:2.3.1.12]+ko000…	Dehydrogenase E1 component		uncharacterized protein A4U43_C08F340 [Asparagus officinalis]	[C] KOG0557 Dihydrolipoamide acetyltransferase	Pyruvate dehydrogenase E1 component subunit alpha-3, chloroplastic OS=Oryza sativa subsp. japonica GN=Os04g0119400 PE=2 SV=2	GO:0005759//mitochondrial matrix;GO:0004742//dihydrolipoyllysine-residue acetyltransferase activity;GO:0006090//pyruvate metabolic process;GO:0045254//pyruvate dehydrogenase complex
Unigene20649_All	986	ko01100//Metabolic pathways;ko00710//Carbon fixation in photosynthetic organisms;ko01200//Carbon metabolism;ko00620//Pyruvate metabolism	Metabolism	Carbohydrate metabolism;Global and overview maps;Energy metabolism	-2.20433	1.45133e-05	8.54997e-06	K01595//phosphoenolpyruvate carboxylase [EC:4.1.1.31]+ko01100//Metabolic pathways+ko00710//Carbon fixation in photosynthetic organisms+ko00620//Pyruvate metabolism+ko01200//Carbon metabolism;K01595//phosphoenolpyruvate carboxylase [EC:4.1.1.31]+ko01100//Metabolic pathways+ko00710//Carbon fixation in photosynthetic organisms+ko00620//Pyruvate metabolism+ko01200//Carbon metabolism;K01595//phosphoen…	Phosphoenolpyruvate carboxylase		hypothetical protein GUITHDRAFT_121941 [Guillardia theta CCMP2712] >EKX31868.1 hypothetical protein GUITHDRAFT_121941 [Guillardia theta CCMP2712]	[C] LSE1452 A Phosphoenolpyruvate carboxylase	Phosphoenolpyruvate carboxylase 1 OS=Flaveria trinervia GN=PPCB PE=1 SV=1	GO:0006099//tricarboxylic acid cycle;GO:0015977//carbon fixation;GO:0008964//phosphoenolpyruvate carboxylase activity
Unigene27812_All	1537	ko01110//Biosynthesis of secondary metabolites;ko00010//Glycolysis / Gluconeogenesis;ko00260//Glycine, serine and threonine metabolism;ko00630//Glyoxylate and dicarboxylate metabolism;ko00020//Citrate cycle (TCA cycle);ko00620//Pyruvate metabolism;ko01200//Carbon metabolism;ko01100//Metabolic pathways;ko00280//Valine, leucine and isoleucine degradation;ko00640//Propanoate metabolism	Metabolism	Carbohydrate metabolism;Amino acid metabolism;Global and overview maps	-2.20433	1.24831e-21	2.99796e-22	K00382//dihydrolipoamide dehydrogenase [EC:1.8.1.4]+ko00010//Glycolysis / Gluconeogenesis+ko00020//Citrate cycle (TCA cycle)+ko00280//Valine, leucine and isoleucine degradation+ko00640//Propanoate metabolism+ko01100//Metabolic pathways+ko01110//Biosynthesis of secondary metabolites+ko00260//Glycine, serine and threonine metabolism+ko00620//Pyruvate metabolism+ko01200//Carbon metabolism+ko00630//G…	Pyridine nucleotide-disulphide oxidoreductase		hypothetical protein AXG93_2015s1160 [Marchantia polymorpha subsp. ruderalis]	[C] KOG1335 Dihydrolipoamide dehydrogenase	Dihydrolipoyl dehydrogenase, mitochondrial OS=Pisum sativum GN=LPD PE=1 SV=2	GO:0009055//electron transfer activity;GO:0004148//dihydrolipoyl dehydrogenase activity;GO:0005623//cell;GO:0050660//flavin adenine dinucleotide binding;GO:0045454//cell redox homeostasis
Unigene29375_All	4066	ko00620//Pyruvate metabolism	Metabolism	Carbohydrate metabolism	-2.34561	1.19379e-104	9.44313e-106	K01069//hydroxyacylglutathione hydrolase [EC:3.1.2.6]+ko00620//Pyruvate metabolism;K01069//hydroxyacylglutathione hydrolase [EC:3.1.2.6]+ko00620//Pyruvate metabolism	Dual-action HEIGH metallo-peptidase		predicted protein [Hordeum vulgare subsp. vulgare]	[R] KOG0813 Glyoxylase	Hydroxyacylglutathione hydrolase cytoplasmic OS=Arabidopsis thaliana GN=GLX2-2 PE=1 SV=2
Unigene57068_All	755	ko01100//Metabolic pathways;ko00630//Glyoxylate and dicarboxylate metabolism;ko01200//Carbon metabolism;ko00072//Synthesis and degradation of ketone bodies;ko00640//Propanoate metabolism;ko00650//Butanoate metabolism;ko00280//Valine, leucine and isoleucine degradation;ko01110//Biosynthesis of secondary metabolites;ko00071//Fatty acid degradation;ko00380//Tryptophan metabolism;ko00310//Lysine degr…	Metabolism	Metabolism of terpenoids and polyketides;Amino acid metabolism;Carbohydrate metabolism;Global and overview maps;Lipid metabolism	-2.35633	1.93329e-06	1.03514e-06	K00626//acetyl-CoA C-acetyltransferase [EC:2.3.1.9]+ko00310//Lysine degradation+ko00380//Tryptophan metabolism+ko00900//Terpenoid backbone biosynthesis+ko00280//Valine, leucine and isoleucine degradation+ko00640//Propanoate metabolism+ko01100//Metabolic pathways+ko00650//Butanoate metabolism+ko01110//Biosynthesis of secondary metabolites+ko01212//Fatty acid metabolism+ko00071//Fatty acid degradat…	Thiolase, N-terminal domain		Acetyl-CoA acetyltransferase [Symbiodinium microadriaticum]	[I] KOG1390 Acetyl-CoA acetyltransferase	Acetyl-CoA acetyltransferase, cytosolic 1 OS=Arabidopsis thaliana GN=AAT1 PE=2 SV=1	GO:0008152//metabolic process;GO:0016747//transferase activity, transferring acyl groups other than amino-acyl groups
Unigene13659_All	2798	ko00630//Glyoxylate and dicarboxylate metabolism;ko00010//Glycolysis / Gluconeogenesis;ko00260//Glycine, serine and threonine metabolism;ko01200//Carbon metabolism;ko00020//Citrate cycle (TCA cycle);ko01100//Metabolic pathways;ko01110//Biosynthesis of secondary metabolites;ko00280//Valine, leucine and isoleucine degradation;ko00640//Propanoate metabolism;ko00620//Pyruvate metabolism	Metabolism	Amino acid metabolism;Global and overview maps;Carbohydrate metabolism	-2.38437	1.36765e-179	7.16549e-181	K00382//dihydrolipoamide dehydrogenase [EC:1.8.1.4]+ko00010//Glycolysis / Gluconeogenesis+ko00020//Citrate cycle (TCA cycle)+ko00280//Valine, leucine and isoleucine degradation+ko00640//Propanoate metabolism+ko01100//Metabolic pathways+ko01110//Biosynthesis of secondary metabolites+ko00260//Glycine, serine and threonine metabolism+ko00620//Pyruvate metabolism+ko01200//Carbon metabolism+ko00630//G…	Pyridine nucleotide-disulphide oxidoreductase	AB182315.1 Heterosigma akashiwo DNA, fragment RA7577N5500.1	mercuric reductase [Ectocarpus siliculosus]	[C] KOG1335 Dihydrolipoamide dehydrogenase	Leghemoglobin reductase OS=Vigna unguiculata GN=FLBR PE=1 SV=1	GO:0009055//electron transfer activity;GO:0005623//cell;GO:0050660//flavin adenine dinucleotide binding;GO:0016021//integral component of membrane;GO:0016668//oxidoreductase activity, acting on a sulfur group of donors, NAD(P) as acceptor;GO:0045454//cell redox homeostasis;GO:0016491//oxidoreductase activity
CL7592.Contig1_All	984	ko00620//Pyruvate metabolism	Metabolism	Carbohydrate metabolism	-2.39155	4.57977e-17	1.29783e-17	K01069//hydroxyacylglutathione hydrolase [EC:3.1.2.6]+ko00620//Pyruvate metabolism;K01069//hydroxyacylglutathione hydrolase [EC:3.1.2.6]+ko00620//Pyruvate metabolism;K01069//hydroxyacylglutathione hydrolase [EC:3.1.2.6]+ko00620//Pyruvate metabolism;K01069//hydroxyacylglutathione hydrolase [EC:3.1.2.6]+ko00620//Pyruvate metabolism	Hydroxyacylglutathione hydrolase C-terminus		PREDICTED: hydroxyacylglutathione hydrolase cytoplasmic [Eucalyptus grandis]	[R] KOG0813 Glyoxylase	Hydroxyacylglutathione hydrolase cytoplasmic OS=Arabidopsis thaliana GN=GLX2-2 PE=1 SV=2	GO:0004416//hydroxyacylglutathione hydrolase activity;GO:0019243//methylglyoxal catabolic process to D-lactate via S-lactoyl-glutathione
Unigene42626_All	2615	ko01110//Biosynthesis of secondary metabolites;ko01100//Metabolic pathways;ko01200//Carbon metabolism;ko00620//Pyruvate metabolism;ko00630//Glyoxylate and dicarboxylate metabolism	Metabolism	Global and overview maps;Carbohydrate metabolism	-2.5422	6.50961e-27	1.35428e-27	K01638//malate synthase [EC:2.3.3.9]+ko01100//Metabolic pathways+ko01110//Biosynthesis of secondary metabolites+ko00620//Pyruvate metabolism+ko01200//Carbon metabolism+ko00630//Glyoxylate and dicarboxylate metabolism;K01638//malate synthase [EC:2.3.3.9]+ko01100//Metabolic pathways+ko01110//Biosynthesis of secondary metabolites+ko00620//Pyruvate metabolism+ko01200//Carbon metabolism+ko00630//Glyox…	Malate synthase		unnamed protein product [Albugo candida]	[C] KOG1261 Malate synthase	Malate synthase, glyoxysomal OS=Cucumis sativus PE=2 SV=2	GO:0006099//tricarboxylic acid cycle;GO:0006097//glyoxylate cycle;GO:0004474//malate synthase activity
Unigene38512_All	918	ko01110//Biosynthesis of secondary metabolites;ko01212//Fatty acid metabolism;ko01100//Metabolic pathways;ko00640//Propanoate metabolism;ko01200//Carbon metabolism;ko00061//Fatty acid biosynthesis;ko00620//Pyruvate metabolism	Metabolism	Lipid metabolism;Global and overview maps;Carbohydrate metabolism	-2.57497	1.03302e-28	2.05896e-29	K01963//acetyl-CoA carboxylase carboxyl transferase subunit beta [EC:6.4.1.2 2.1.3.15]+ko00640//Propanoate metabolism+ko01100//Metabolic pathways+ko01110//Biosynthesis of secondary metabolites+ko00061//Fatty acid biosynthesis+ko01212//Fatty acid metabolism+ko00620//Pyruvate metabolism+ko01200//Carbon metabolism;K01963//acetyl-CoA carboxylase carboxyl transferase subunit beta [EC:6.4.1.2 2.1.3.15]…	Carboxyl transferase domain		beta subunit of acetyl-CoA carboxylase carboxytransferase (chloroplast) [Chlorosarcina brevispinosa]	[EI] KOG0540 3-Methylcrotonyl-CoA carboxylase, non-biotin containing subunit/Acetyl-CoA carboxylase carboxyl transferase, subunit beta	Acetyl-coenzyme A carboxylase carboxyl transferase subunit beta, chloroplastic OS=Chlorella vulgaris GN=accD PE=3 SV=1
Unigene20219_All	659	ko00620//Pyruvate metabolism;ko00410//beta-Alanine metabolism;ko00280//Valine, leucine and isoleucine degradation;ko00310//Lysine degradation;ko00071//Fatty acid degradation;ko01110//Biosynthesis of secondary metabolites;ko00053//Ascorbate and aldarate metabolism;ko01100//Metabolic pathways;ko00561//Glycerolipid metabolism;ko00010//Glycolysis / Gluconeogenesis;ko00380//Tryptophan metabolism;ko003…	Metabolism	Metabolism of other amino acids;Carbohydrate metabolism;Metabolism of terpenoids and polyketides;Amino acid metabolism;Lipid metabolism;Global and overview maps	-2.61937	1.20291e-05	7.0197e-06	K00128//aldehyde dehydrogenase (NAD+) [EC:1.2.1.3]+ko00410//beta-Alanine metabolism+ko00310//Lysine degradation+ko00010//Glycolysis / Gluconeogenesis+ko00903//Limonene and pinene degradation+ko00380//Tryptophan metabolism+ko00330//Arginine and proline metabolism+ko00280//Valine, leucine and isoleucine degradation+ko01100//Metabolic pathways+ko00053//Ascorbate and aldarate metabolism+ko00340//Hist…	Aldehyde dehydrogenase family		PREDICTED: aldehyde dehydrogenase family 2 member B7, mitochondrial-like [Gossypium hirsutum]	[C] KOG2450 Aldehyde dehydrogenase	Aldehyde dehydrogenase family 2 member B7, mitochondrial OS=Arabidopsis thaliana GN=ALDH2B7 PE=1 SV=2	GO:0016491//oxidoreductase activity
CL936.Contig2_All	4340	ko00010//Glycolysis / Gluconeogenesis;ko01200//Carbon metabolism;ko01110//Biosynthesis of secondary metabolites;ko01100//Metabolic pathways;ko00620//Pyruvate metabolism;ko00020//Citrate cycle (TCA cycle)	Metabolism	Carbohydrate metabolism;Global and overview maps	-2.63927	4.02824e-87	3.62068e-88	K00162//pyruvate dehydrogenase E1 component beta subunit [EC:1.2.4.1]+ko00010//Glycolysis / Gluconeogenesis+ko00020//Citrate cycle (TCA cycle)+ko01100//Metabolic pathways+ko01110//Biosynthesis of secondary metabolites+ko00620//Pyruvate metabolism+ko01200//Carbon metabolism;K00162//pyruvate dehydrogenase E1 component beta subunit [EC:1.2.4.1]+ko00010//Glycolysis / Gluconeogenesis+ko00020//Citrate …	Dehydrogenase E1 component	KJ532065.1 Kappaphycus alvarezii DNA marker SXBA04 genomic sequence	pyruvate dehydrogenase E1 component beta subunit, mitochondrial precursor (ISS) [Ostreococcus tauri]	[C] KOG0524 Pyruvate dehydrogenase E1, beta subunit	Pyruvate dehydrogenase E1 component subunit beta-2, mitochondrial OS=Oryza sativa subsp. japonica GN=Os09g0509200 PE=2 SV=1	GO:0004739//pyruvate dehydrogenase (acetyl-transferring) activity;GO:0006086//acetyl-CoA biosynthetic process from pyruvate
Unigene34523_All	703	ko00620//Pyruvate metabolism	Metabolism	Carbohydrate metabolism	-2.74712	2.59068e-10	1.02209e-10	K00102//D-lactate dehydrogenase (cytochrome) [EC:1.1.2.4]+ko00620//Pyruvate metabolism;K18930//D-lactate dehydrogenase;K00102//D-lactate dehydrogenase (cytochrome) [EC:1.1.2.4]+ko00620//Pyruvate metabolism;K00102//D-lactate dehydrogenase (cytochrome) [EC:1.1.2.4]+ko00620//Pyruvate metabolism	FAD binding domain		oxidoreductase, putative, partial [Ricinus communis]	[C] KOG1231 Proteins containing the FAD binding domain	D-lactate dehydrogenase [cytochrome], mitochondrial OS=Arabidopsis thaliana GN=DLD PE=1 SV=1	GO:0016614//oxidoreductase activity, acting on CH-OH group of donors;GO:0004458//D-lactate dehydrogenase (cytochrome) activity;GO:0050660//flavin adenine dinucleotide binding;GO:0016021//integral component of membrane;GO:0051536//iron-sulfur cluster binding
CL10685.Contig1_All	2372	ko00071//Fatty acid degradation;ko00561//Glycerolipid metabolism;ko01100//Metabolic pathways;ko00053//Ascorbate and aldarate metabolism;ko00380//Tryptophan metabolism;ko00010//Glycolysis / Gluconeogenesis;ko00260//Glycine, serine and threonine metabolism;ko00410//beta-Alanine metabolism;ko00330//Arginine and proline metabolism;ko00620//Pyruvate metabolism;ko00250//Alanine, aspartate and glutamate…	Metabolism	Lipid metabolism;Global and overview maps;Metabolism of other amino acids;Carbohydrate metabolism;Amino acid metabolism	-2.82739	2.41929e-44	3.53109e-45	K14085//aldehyde dehydrogenase family 7 member A1 [EC:1.2.1.31 1.2.1.8 1.2.1.3]+ko00410//beta-Alanine metabolism+ko00310//Lysine degradation+ko00010//Glycolysis / Gluconeogenesis+ko00380//Tryptophan metabolism+ko00330//Arginine and proline metabolism+ko00280//Valine, leucine and isoleucine degradation+ko01100//Metabolic pathways+ko00053//Ascorbate and aldarate metabolism+ko00340//Histidine metabo…	Aldehyde dehydrogenase family		predicted protein [Micromonas commoda] >ACO61894.1 predicted protein [Micromonas commoda]	[R] KOG1075 FOG: Reverse transcriptase	Succinate-semialdehyde dehydrogenase, mitochondrial OS=Arabidopsis thaliana GN=ALDH5F1 PE=1 SV=2	GO:0004657//proline dehydrogenase activity;GO:0010133//proline catabolic process to glutamate;GO:0003700//DNA binding transcription factor activity;GO:0003842//1-pyrroline-5-carboxylate dehydrogenase activity;GO:0016491//oxidoreductase activity
Unigene485_All	1648	ko01110//Biosynthesis of secondary metabolites;ko01200//Carbon metabolism;ko00710//Carbon fixation in photosynthetic organisms;ko00620//Pyruvate metabolism;ko00010//Glycolysis / Gluconeogenesis;ko00020//Citrate cycle (TCA cycle);ko01100//Metabolic pathways	Metabolism	Global and overview maps;Carbohydrate metabolism;Energy metabolism	-2.8957	6.80374e-19	1.79301e-19	K01610//phosphoenolpyruvate carboxykinase (ATP) [EC:4.1.1.49]+ko00010//Glycolysis / Gluconeogenesis+ko00020//Citrate cycle (TCA cycle)+ko01100//Metabolic pathways+ko01110//Biosynthesis of secondary metabolites+ko00710//Carbon fixation in photosynthetic organisms+ko00620//Pyruvate metabolism+ko01200//Carbon metabolism;K01610//phosphoenolpyruvate carboxykinase (ATP) [EC:4.1.1.49]+ko00010//Glycolysi…	Phosphoenolpyruvate carboxykinase		phosphoenolpyruvate carboxykinase (ATP) [Phytophthora parasitica]	[C] TWOG0797 Phosphoenolpyruvate carboxykinase (ATP)	Phosphoenolpyruvate carboxykinase (ATP) OS=Arabidopsis thaliana GN=PCKA PE=1 SV=1	GO:0005524//ATP binding;GO:0006094//gluconeogenesis;GO:0016301//kinase activity;GO:0004612//phosphoenolpyruvate carboxykinase (ATP) activity
CL1407.Contig2_All	1634	ko00620//Pyruvate metabolism	Metabolism	Carbohydrate metabolism	-2.93677	0	0	K18881//D-lactate dehydratase [EC:4.2.1.130]+ko00620//Pyruvate metabolism;K18881//D-lactate dehydratase [EC:4.2.1.130]+ko00620//Pyruvate metabolism;K18881//D-lactate dehydratase [EC:4.2.1.130]+ko00620//Pyruvate metabolism;K18881//D-lactate dehydratase [EC:4.2.1.130]+ko00620//Pyruvate metabolism;K18881//D-lactate dehydratase [EC:4.2.1.130]+ko00620//Pyruvate metabolism	DJ-1/PfpI family	XM_003553072.3 PREDICTED: Glycine max protein DJ-1 homolog D-like (LOC100795300), mRNA	hypothetical protein GUITHDRAFT_85381 [Guillardia theta CCMP2712] >EKX50110.1 hypothetical protein GUITHDRAFT_85381 [Guillardia theta CCMP2712]	[A] KOG1869 Splicing coactivator SRm160/300, subunit SRm300	Protein DJ-1 homolog D OS=Arabidopsis thaliana GN=DJ1D PE=1 SV=1	GO:0019172//glyoxalase III activity
CL9215.Contig1_All	1079	ko00630//Glyoxylate and dicarboxylate metabolism;ko00010//Glycolysis / Gluconeogenesis;ko01200//Carbon metabolism;ko00620//Pyruvate metabolism;ko01100//Metabolic pathways;ko00640//Propanoate metabolism;ko01110//Biosynthesis of secondary metabolites	Metabolism	Carbohydrate metabolism;Global and overview maps	-3.01673	2.2484e-05	1.35572e-05	K01895//acetyl-CoA synthetase [EC:6.2.1.1]+ko00010//Glycolysis / Gluconeogenesis+ko00640//Propanoate metabolism+ko01100//Metabolic pathways+ko01110//Biosynthesis of secondary metabolites+ko00620//Pyruvate metabolism+ko01200//Carbon metabolism+ko00630//Glyoxylate and dicarboxylate metabolism;K01895//acetyl-CoA synthetase [EC:6.2.1.1]+ko00010//Glycolysis / Gluconeogenesis+ko00640//Propanoate metabo…	AMP-binding enzyme		PREDICTED: uncharacterized protein PA3568 [Ricinus communis] >EEF26567.1 acetyl-CoA synthetase, putative [Ricinus communis]	[I] KOG1175 Acyl-CoA synthetase	Formin-like protein 3 OS=Oryza sativa subsp. japonica GN=FH3 PE=2 SV=2	GO:0003987//acetate-CoA ligase activity;GO:0008152//metabolic process;GO:0003824//catalytic activity
Unigene86158_All	638	ko00260//Glycine, serine and threonine metabolism;ko00630//Glyoxylate and dicarboxylate metabolism;ko01110//Biosynthesis of secondary metabolites;ko00020//Citrate cycle (TCA cycle);ko00280//Valine, leucine and isoleucine degradation;ko00620//Pyruvate metabolism;ko01100//Metabolic pathways;ko01200//Carbon metabolism;ko00010//Glycolysis / Gluconeogenesis;ko00640//Propanoate metabolism	Metabolism	Amino acid metabolism;Global and overview maps;Carbohydrate metabolism	-3.38455	1.46995e-81	1.38479e-82	K00382//dihydrolipoamide dehydrogenase [EC:1.8.1.4]+ko00010//Glycolysis / Gluconeogenesis+ko00020//Citrate cycle (TCA cycle)+ko00280//Valine, leucine and isoleucine degradation+ko00640//Propanoate metabolism+ko01100//Metabolic pathways+ko01110//Biosynthesis of secondary metabolites+ko00260//Glycine, serine and threonine metabolism+ko00620//Pyruvate metabolism+ko01200//Carbon metabolism+ko00630//G…	Pyridine nucleotide-disulphide oxidoreductase		mercuric reductase [Ectocarpus siliculosus]	[C] KOG1335 Dihydrolipoamide dehydrogenase	Dihydrolipoyl dehydrogenase 1, chloroplastic OS=Arabidopsis thaliana GN=LPD1 PE=2 SV=1	GO:0009055//electron transfer activity;GO:0005623//cell;GO:0050660//flavin adenine dinucleotide binding;GO:0016021//integral component of membrane;GO:0016668//oxidoreductase activity, acting on a sulfur group of donors, NAD(P) as acceptor;GO:0045454//cell redox homeostasis;GO:0016491//oxidoreductase activity
CL10685.Contig2_All	2004	ko00380//Tryptophan metabolism;ko00250//Alanine, aspartate and glutamate metabolism;ko00260//Glycine, serine and threonine metabolism;ko00561//Glycerolipid metabolism;ko01110//Biosynthesis of secondary metabolites;ko00053//Ascorbate and aldarate metabolism;ko00650//Butanoate metabolism;ko00330//Arginine and proline metabolism;ko00280//Valine, leucine and isoleucine degradation;ko00010//Glycolysis…	Metabolism	Metabolism of other amino acids;Global and overview maps;Carbohydrate metabolism;Lipid metabolism;Amino acid metabolism	-3.50777	3.08077e-18	8.33384e-19	K17761//succinate-semialdehyde dehydrogenase, mitochondrial [EC:1.2.1.24]+ko00250//Alanine, aspartate and glutamate metabolism+ko01100//Metabolic pathways+ko00650//Butanoate metabolism;K14085//aldehyde dehydrogenase family 7 member A1 [EC:1.2.1.31 1.2.1.8 1.2.1.3]+ko00410//beta-Alanine metabolism+ko00310//Lysine degradation+ko00010//Glycolysis / Gluconeogenesis+ko00380//Tryptophan metabolism+ko00…	Aldehyde dehydrogenase family		predicted protein [Micromonas commoda] >ACO61894.1 predicted protein [Micromonas commoda]	[C] KOG2450 Aldehyde dehydrogenase	Aldehyde dehydrogenase family 7 member A1 OS=Brassica napus GN=BTG-26 PE=1 SV=3	GO:0004657//proline dehydrogenase activity;GO:0010133//proline catabolic process to glutamate;GO:0003700//DNA binding transcription factor activity;GO:0003842//1-pyrroline-5-carboxylate dehydrogenase activity;GO:0016491//oxidoreductase activity
Unigene41449_All	1509	ko01110//Biosynthesis of secondary metabolites;ko00620//Pyruvate metabolism;ko00270//Cysteine and methionine metabolism;ko01200//Carbon metabolism;ko01100//Metabolic pathways;ko00020//Citrate cycle (TCA cycle);ko00630//Glyoxylate and dicarboxylate metabolism;ko00710//Carbon fixation in photosynthetic organisms	Metabolism	Carbohydrate metabolism;Energy metabolism;Global and overview maps;Amino acid metabolism	-3.53108	0	0	K00026//malate dehydrogenase [EC:1.1.1.37]+ko00020//Citrate cycle (TCA cycle)+ko01100//Metabolic pathways+ko01110//Biosynthesis of secondary metabolites+ko00710//Carbon fixation in photosynthetic organisms+ko00620//Pyruvate metabolism+ko00270//Cysteine and methionine metabolism+ko01200//Carbon metabolism+ko00630//Glyoxylate and dicarboxylate metabolism;K00026//malate dehydrogenase [EC:1.1.1.37]+k…	lactate/malate dehydrogenase, alpha/beta C-terminal domain		malate dehydrogenase [Sargassum thunbergii]	[C] KOG1494 NAD-dependent malate dehydrogenase	Malate dehydrogenase, glyoxysomal OS=Oryza sativa subsp. japonica GN=Os12g0632700 PE=1 SV=3
[truncated: 68 more rows]

## Sheet: Carbon fixation 
Supplementary Table 3:	Differentially expressed genes involved in carbon fixation metabolism
[truncated: 76 more rows]
