# Supplementary material for: Ocean warming and acidification affect the transitional element and macromolecular accumulation in harmful raphidophyte Heterosigma akashiwo
Source: Research Square preprint supplement (doi:10.21203/rs.3.rs-2173912/v1), 2022-11-03
Supplement: Supplementary file 2 [file 42853d11ebd4d41d103ab737.xlsx]

## Sheet: Aminoacetyl-tRNA biosynthesis
Supplementary Table 7:	Differentially expressed genes involved in Aminoacetyl-tRNA biosynthesis metabolism
Gene ID	Length	Pathway Name	Level 1	Level 2	log2(He_1000/He_400)	Qvalue(He_400-vs-He_1000)	Pvalue(He_400-vs-He_1000)	Kegg Orthology	Pfam	Nt	Nr	Kog	Swissprot	GO
Unigene50979_All	722	ko00970//Aminoacyl-tRNA biosynthesis	Genetic Information Processing	Translation	5.28752	7.1273e-06	4.05199e-06	K04567//lysyl-tRNA synthetase, class II [EC:6.1.1.6]+ko00970//Aminoacyl-tRNA biosynthesis;K04567//lysyl-tRNA synthetase, class II [EC:6.1.1.6]+ko00970//Aminoacyl-tRNA biosynthesis;K04567//lysyl-tRNA synthetase, class II [EC:6.1.1.6]+ko00970//Aminoacyl-tRNA biosynthesis;K04567//lysyl-tRNA synthetase, class II [EC:6.1.1.6]+ko00970//Aminoacyl-tRNA biosynthesis	tRNA synthetases class II (D, K and N)	XM_001697441.1 Chlamydomonas reinhardtii lysyl-trna synthetase, LysRS (CHLREDRAFT_138493), mRNA	lysyl-trna synthetase, LysRS [Chlamydomonas reinhardtii] >EDP00155.1 lysyl-trna synthetase, LysRS [Chlamydomonas reinhardtii]	[J] KOG1885 Lysyl-tRNA synthetase (class II)	Lysine--tRNA ligase OS=Oryza sativa subsp. japonica GN=Os03g0586800 PE=2 SV=1	GO:0006430//lysyl-tRNA aminoacylation;GO:0005524//ATP binding;GO:0004824//lysine-tRNA ligase activity;GO:0005737//cytoplasm;GO:0003676//nucleic acid binding
CL10072.Contig1_All	3398	ko00970//Aminoacyl-tRNA biosynthesis	Genetic Information Processing	Translation	1.62688	6.58441e-21	1.61973e-21	K01869//leucyl-tRNA synthetase [EC:6.1.1.4]+ko00970//Aminoacyl-tRNA biosynthesis;K01869//leucyl-tRNA synthetase [EC:6.1.1.4]+ko00970//Aminoacyl-tRNA biosynthesis;K01869//leucyl-tRNA synthetase [EC:6.1.1.4]+ko00970//Aminoacyl-tRNA biosynthesis	Leucyl-tRNA synthetase, Domain 2	XM_011400115.1 Auxenochlorella protothecoides Leucine-tRNA ligase partial mRNA	leucyl-trna synthetase [Nannochloropsis gaditana]	[J] KOG0435 Leucyl-tRNA synthetase	Leucine--tRNA ligase, chloroplastic/mitochondrial OS=Arabidopsis thaliana GN=EMB2369 PE=2 SV=1	GO:0004823//leucine-tRNA ligase activity;GO:0005524//ATP binding;GO:0002161//aminoacyl-tRNA editing activity;GO:0016021//integral component of membrane;GO:0006429//leucyl-tRNA aminoacylation
CL10348.Contig2_All	1600	ko00450//Selenocompound metabolism;ko00970//Aminoacyl-tRNA biosynthesis	Genetic Information Processing;Metabolism	Translation;Metabolism of other amino acids	1.50334	2.50819e-07	1.23345e-07	K15437//aminoacyl tRNA synthase complex-interacting multifunctional protein 1;K01874//methionyl-tRNA synthetase [EC:6.1.1.10]+ko00970//Aminoacyl-tRNA biosynthesis+ko00450//Selenocompound metabolism	Putative tRNA binding domain	XM_004136376.2 PREDICTED: Cucumis sativus uncharacterized LOC101205953 (LOC101205953), mRNA	endothelial monocyte-activating polypeptide ii precursor pro-emap ii family protein [Nannochloropsis gaditana]	[J] KOG2241 tRNA-binding protein	Probable methionine--tRNA ligase OS=Oryza sativa subsp. japonica GN=Os06g0508700 PE=2 SV=2
CL10479.Contig1_All	5075	ko00860//Porphyrin and chlorophyll metabolism;ko01110//Biosynthesis of secondary metabolites;ko01100//Metabolic pathways;ko00970//Aminoacyl-tRNA biosynthesis	Metabolism;Genetic Information Processing	Global and overview maps;Metabolism of cofactors and vitamins;Translation	1.05989	6.43805e-31	1.22208e-31	K01885//glutamyl-tRNA synthetase [EC:6.1.1.17]+ko00860//Porphyrin and chlorophyll metabolism+ko00970//Aminoacyl-tRNA biosynthesis+ko01100//Metabolic pathways+ko01110//Biosynthesis of secondary metabolites;K01885//glutamyl-tRNA synthetase [EC:6.1.1.17]+ko00860//Porphyrin and chlorophyll metabolism+ko00970//Aminoacyl-tRNA biosynthesis+ko01100//Metabolic pathways+ko01110//Biosynthesis of secondary m…	tRNA synthetases class I (E and Q), catalytic domain		plus agglutinin [Chlamydomonas reinhardtii]	[J] KOG1149 Glutamyl-tRNA synthetase (mitochondrial)	Glutamate--tRNA ligase, chloroplastic/mitochondrial OS=Nicotiana tabacum PE=2 SV=1
Unigene41214_All	1338	ko00970//Aminoacyl-tRNA biosynthesis	Genetic Information Processing	Translation	-1.0344	9.699e-05	6.34895e-05	K01869//leucyl-tRNA synthetase [EC:6.1.1.4]+ko00970//Aminoacyl-tRNA biosynthesis;K01869//leucyl-tRNA synthetase [EC:6.1.1.4]+ko00970//Aminoacyl-tRNA biosynthesis;K01869//leucyl-tRNA synthetase [EC:6.1.1.4]+ko00970//Aminoacyl-tRNA biosynthesis	Leucyl-tRNA synthetase, Domain 2		PREDICTED: putative leucine--tRNA ligase, mitochondrial [Gossypium raimondii] >XP_012449704.1 PREDICTED: putative leucine--tRNA ligase, mitochondrial [Gossypium raimondii] >KJB67266.1 hypothetical protein B456_010G183100 [Gossypium raimondii] >KJB67267.1 hypothetical protein B456_010G183100 [Gossypium raimondii] >KJB67268.1 hypothetical protein B456_010G183100 [Gossypium raimondii]	[J] KOG0435 Leucyl-tRNA synthetase	Leucine--tRNA ligase, chloroplastic/mitochondrial OS=Arabidopsis thaliana GN=EMB2369 PE=2 SV=1	GO:0004823//leucine-tRNA ligase activity;GO:0005524//ATP binding;GO:0002161//aminoacyl-tRNA editing activity;GO:0006429//leucyl-tRNA aminoacylation
Unigene41335_All	2244	ko00970//Aminoacyl-tRNA biosynthesis	Genetic Information Processing	Translation	-1.05035	6.00824e-05	3.81613e-05	K01869//leucyl-tRNA synthetase [EC:6.1.1.4]+ko00970//Aminoacyl-tRNA biosynthesis;K01869//leucyl-tRNA synthetase [EC:6.1.1.4]+ko00970//Aminoacyl-tRNA biosynthesis;K01869//leucyl-tRNA synthetase [EC:6.1.1.4]+ko00970//Aminoacyl-tRNA biosynthesis;K01869//leucyl-tRNA synthetase [EC:6.1.1.4]+ko00970//Aminoacyl-tRNA biosynthesis;K01869//leucyl-tRNA synthetase [EC:6.1.1.4]+ko00970//Aminoacyl-tRNA biosynt…	Anticodon-binding domain of tRNA		leucine--tRNA ligase, chloroplastic/mitochondrial isoform X2 [Spinacia oleracea]	[J] KOG0435 Leucyl-tRNA synthetase	Leucine--tRNA ligase, chloroplastic/mitochondrial OS=Arabidopsis thaliana GN=EMB2369 PE=2 SV=1	GO:0004823//leucine-tRNA ligase activity;GO:0005524//ATP binding;GO:0002161//aminoacyl-tRNA editing activity;GO:0006429//leucyl-tRNA aminoacylation;GO:0005739//mitochondrion;GO:0009570//chloroplast stroma
CL3613.Contig2_All	824	ko00970//Aminoacyl-tRNA biosynthesis;ko01100//Metabolic pathways	Metabolism;Genetic Information Processing	Global and overview maps;Translation	-1.05197	1.48074e-08	6.58912e-09	K02433//aspartyl-tRNA(Asn)/glutamyl-tRNA(Gln) amidotransferase subunit A [EC:6.3.5.6 6.3.5.7]+ko00970//Aminoacyl-tRNA biosynthesis+ko01100//Metabolic pathways	CRAL/TRIO domain		conserved unknown protein [Ectocarpus siliculosus]	[I] KOG1471 Phosphatidylinositol transfer protein SEC14 and related proteins	Phosphatidylinositol/phosphatidylcholine transfer protein SFH5 OS=Arabidopsis thaliana GN=SFH5 PE=2 SV=1	GO:0005524//ATP binding;GO:0050567//glutaminyl-tRNA synthase (glutamine-hydrolyzing) activity;GO:0030956//glutamyl-tRNA(Gln) amidotransferase complex;GO:0004040//amidase activity;GO:0032543//mitochondrial translation;GO:0005739//mitochondrion;GO:0016740//transferase activity;GO:0070681//glutaminyl-tRNAGln biosynthesis via transamidation;GO:0009570//chloroplast stroma
Unigene21943_All	2266	ko00970//Aminoacyl-tRNA biosynthesis;ko01100//Metabolic pathways	Metabolism;Genetic Information Processing	Global and overview maps;Translation	-1.08563	1.35463e-08	6.01022e-09	K01886//glutaminyl-tRNA synthetase [EC:6.1.1.18]+ko00970//Aminoacyl-tRNA biosynthesis+ko01100//Metabolic pathways;K01886//glutaminyl-tRNA synthetase [EC:6.1.1.18]+ko00970//Aminoacyl-tRNA biosynthesis+ko01100//Metabolic pathways;K01886//glutaminyl-tRNA synthetase [EC:6.1.1.18]+ko00970//Aminoacyl-tRNA biosynthesis+ko01100//Metabolic pathways;K01886//glutaminyl-tRNA synthetase [EC:6.1.1.18]+ko00970/…	tRNA synthetases class I (E and Q), catalytic domain		glutaminyl-tRNA synthetase [Chrysochromulina sp. CCMP291]	[J] KOG1148 Glutaminyl-tRNA synthetase	Glutamine--tRNA ligase OS=Lupinus luteus PE=2 SV=2	GO:0005524//ATP binding;GO:0004819//glutamine-tRNA ligase activity;GO:0000049//tRNA binding;GO:0005737//cytoplasm;GO:0006425//glutaminyl-tRNA aminoacylation
Unigene45034_All	2973	ko00970//Aminoacyl-tRNA biosynthesis	Genetic Information Processing	Translation	-1.09286	4.15944e-189	2.07969e-190	K01868//threonyl-tRNA synthetase [EC:6.1.1.3]+ko00970//Aminoacyl-tRNA biosynthesis;K01868//threonyl-tRNA synthetase [EC:6.1.1.3]+ko00970//Aminoacyl-tRNA biosynthesis;K01868//threonyl-tRNA synthetase [EC:6.1.1.3]+ko00970//Aminoacyl-tRNA biosynthesis;K01868//threonyl-tRNA synthetase [EC:6.1.1.3]+ko00970//Aminoacyl-tRNA biosynthesis;K01868//threonyl-tRNA synthetase [EC:6.1.1.3]+ko00970//Aminoacyl-tR…	tRNA synthetase class II core domain (G, H, P, S and T)	XM_013039690.1 Blastocystis hominis mRNA	threonyl-tRNA synthetase [Vaucheria litorea]	[J] KOG1637 Threonyl-tRNA synthetase	Threonine--tRNA ligase, mitochondrial 1 OS=Arabidopsis thaliana GN=THRRS PE=1 SV=3	GO:0004829//threonine-tRNA ligase activity;GO:0005524//ATP binding;GO:0006435//threonyl-tRNA aminoacylation;GO:0005737//cytoplasm
Unigene33253_All	2676	ko00970//Aminoacyl-tRNA biosynthesis	Genetic Information Processing	Translation	-1.10596	1.02666e-06	5.34738e-07	K01873//valyl-tRNA synthetase [EC:6.1.1.9]+ko00970//Aminoacyl-tRNA biosynthesis;K01873//valyl-tRNA synthetase [EC:6.1.1.9]+ko00970//Aminoacyl-tRNA biosynthesis;K01873//valyl-tRNA synthetase [EC:6.1.1.9]+ko00970//Aminoacyl-tRNA biosynthesis;K01873//valyl-tRNA synthetase [EC:6.1.1.9]+ko00970//Aminoacyl-tRNA biosynthesis;K01873//valyl-tRNA synthetase [EC:6.1.1.9]+ko00970//Aminoacyl-tRNA biosynthesis	tRNA synthetases class I (I, L, M and V)		Aminoacyl-tRNA synthetase, class Ia [Corchorus capsularis]	[J] KOG0432 Valyl-tRNA synthetase	Leucine--tRNA ligase, chloroplastic/mitochondrial OS=Arabidopsis thaliana GN=EMB2369 PE=2 SV=1	GO:0004832//valine-tRNA ligase activity;GO:0005524//ATP binding;GO:0002161//aminoacyl-tRNA editing activity;GO:0006438//valyl-tRNA aminoacylation;GO:0005737//cytoplasm
Unigene21905_All	1649	ko00970//Aminoacyl-tRNA biosynthesis	Genetic Information Processing	Translation	-1.10996	6.40721e-10	2.5912e-10	K04567//lysyl-tRNA synthetase, class II [EC:6.1.1.6]+ko00970//Aminoacyl-tRNA biosynthesis;K04567//lysyl-tRNA synthetase, class II [EC:6.1.1.6]+ko00970//Aminoacyl-tRNA biosynthesis;K04567//lysyl-tRNA synthetase, class II [EC:6.1.1.6]+ko00970//Aminoacyl-tRNA biosynthesis;K04567//lysyl-tRNA synthetase, class II [EC:6.1.1.6]+ko00970//Aminoacyl-tRNA biosynthesis;K04567//lysyl-tRNA synthetase, class II…	tRNA synthetases class II (D, K and N)		lysyl-tRNA synthetase [Guillardia theta CCMP2712] >EKX34564.1 lysyl-tRNA synthetase [Guillardia theta CCMP2712]	[J] KOG1885 Lysyl-tRNA synthetase (class II)	Lysine--tRNA ligase, chloroplastic/mitochondrial OS=Arabidopsis thaliana GN=OVA5 PE=2 SV=1	GO:0006430//lysyl-tRNA aminoacylation;GO:0005524//ATP binding;GO:0004824//lysine-tRNA ligase activity;GO:0005737//cytoplasm;GO:0003676//nucleic acid binding
CL1504.Contig8_All	4617	ko00970//Aminoacyl-tRNA biosynthesis	Genetic Information Processing	Translation	-1.16655	0	0	K01872//alanyl-tRNA synthetase [EC:6.1.1.7]+ko00970//Aminoacyl-tRNA biosynthesis;K01872//alanyl-tRNA synthetase [EC:6.1.1.7]+ko00970//Aminoacyl-tRNA biosynthesis;K01872//alanyl-tRNA synthetase [EC:6.1.1.7]+ko00970//Aminoacyl-tRNA biosynthesis	tRNA synthetases class II (A)	XM_009517811.1 Phytophthora sojae hypothetical protein partial mRNA	Alanyl-tRNA Synthetase [Ectocarpus siliculosus]	[J] KOG0188 Alanyl-tRNA synthetase	Alanine--tRNA ligase OS=Arabidopsis thaliana GN=ALATS PE=1 SV=3	GO:0016597//amino acid binding;GO:0005524//ATP binding;GO:0000049//tRNA binding;GO:0006400//tRNA modification;GO:0008270//zinc ion binding;GO:0005739//mitochondrion;GO:0070143//mitochondrial alanyl-tRNA aminoacylation;GO:0006419//alanyl-tRNA aminoacylation;GO:0004813//alanine-tRNA ligase activity
Unigene44845_All	1781	ko00970//Aminoacyl-tRNA biosynthesis	Genetic Information Processing	Translation	-1.20724	1.56588e-07	7.56004e-08	K01872//alanyl-tRNA synthetase [EC:6.1.1.7]+ko00970//Aminoacyl-tRNA biosynthesis;K01872//alanyl-tRNA synthetase [EC:6.1.1.7]+ko00970//Aminoacyl-tRNA biosynthesis;K01872//alanyl-tRNA synthetase [EC:6.1.1.7]+ko00970//Aminoacyl-tRNA biosynthesis	tRNA synthetases class II (A)		alas protein [Ostreococcus tauri]	[J] KOG0188 Alanyl-tRNA synthetase	Alanine--tRNA ligase, chloroplastic/mitochondrial OS=Ostreococcus lucimarinus (strain CCE9901) GN=OSTLU_32618 PE=3 SV=1	GO:0005524//ATP binding;GO:0008270//zinc ion binding;GO:0006419//alanyl-tRNA aminoacylation;GO:0000049//tRNA binding;GO:0009536//plastid;GO:0070111//organellar chromatophore;GO:0004813//alanine-tRNA ligase activity
Unigene9658_All	2102	ko00970//Aminoacyl-tRNA biosynthesis	Genetic Information Processing	Translation	-1.20916	0	0	K01866//tyrosyl-tRNA synthetase [EC:6.1.1.1]+ko00970//Aminoacyl-tRNA biosynthesis;K01866//tyrosyl-tRNA synthetase [EC:6.1.1.1]+ko00970//Aminoacyl-tRNA biosynthesis	tRNA synthetases class I (W and Y)	XM_012349524.1 Saprolegnia parasitica CBS 223.65 tyrosyl-tRNA synthetase mRNA	Aminoacyl-tRNA synthetase, class Ic [Nannochloropsis gaditana]	[J] KOG2144 Tyrosyl-tRNA synthetase, cytoplasmic	Tyrosine--tRNA ligase 1, cytoplasmic OS=Arabidopsis thaliana GN=At2g33840 PE=2 SV=1	GO:0005524//ATP binding;GO:0006418//tRNA aminoacylation for protein translation;GO:0004831//tyrosine-tRNA ligase activity
Unigene30200_All	2192	ko00970//Aminoacyl-tRNA biosynthesis	Genetic Information Processing	Translation	-1.22355	1.29935e-271	4.87903e-273	K01880//glycyl-tRNA synthetase [EC:6.1.1.14]+ko00970//Aminoacyl-tRNA biosynthesis;K01880//glycyl-tRNA synthetase [EC:6.1.1.14]+ko00970//Aminoacyl-tRNA biosynthesis;K01880//glycyl-tRNA synthetase [EC:6.1.1.14]+ko00970//Aminoacyl-tRNA biosynthesis	Anticodon binding domain	XM_001702138.1 Chlamydomonas reinhardtii glycyl-tRNA synthetase (CHLREDRAFT_82920), mRNA	glycyl-trna synthetase [Nannochloropsis gaditana]	[J] KOG2298 Glycyl-tRNA synthetase and related class II tRNA synthetase	Glycine--tRNA ligase, mitochondrial 1 OS=Arabidopsis thaliana GN=At1g29880 PE=1 SV=1	GO:0070150//mitochondrial glycyl-tRNA aminoacylation;GO:0004820//glycine-tRNA ligase activity;GO:0005524//ATP binding;GO:0006426//glycyl-tRNA aminoacylation;GO:0005739//mitochondrion;GO:0005737//cytoplasm
CL2071.Contig2_All	3104	ko00450//Selenocompound metabolism;ko00970//Aminoacyl-tRNA biosynthesis	Genetic Information Processing;Metabolism	Translation;Metabolism of other amino acids	-1.22791	2.2602e-81	2.13289e-82	K01874//methionyl-tRNA synthetase [EC:6.1.1.10]+ko00970//Aminoacyl-tRNA biosynthesis+ko00450//Selenocompound metabolism;K01874//methionyl-tRNA synthetase [EC:6.1.1.10]+ko00970//Aminoacyl-tRNA biosynthesis+ko00450//Selenocompound metabolism;K01874//methionyl-tRNA synthetase [EC:6.1.1.10]+ko00970//Aminoacyl-tRNA biosynthesis+ko00450//Selenocompound metabolism;K01874//methionyl-tRNA synthetase [EC:6…	tRNA synthetases class I (M)	XM_012348578.1 Saprolegnia parasitica CBS 223.65 hypothetical protein mRNA	methionyl-tRNA synthetase [Nannochloropsis gaditana CCMP526] >EKU20880.1 methionyl-tRNA synthetase [Nannochloropsis gaditana CCMP526]	[J] KOG0436 Methionyl-tRNA synthetase	Glycine-rich protein DOT1 OS=Arabidopsis thaliana GN=DOT1 PE=2 SV=1	GO:0005524//ATP binding;GO:0006431//methionyl-tRNA aminoacylation;GO:0004825//methionine-tRNA ligase activity;GO:0000049//tRNA binding;GO:0005737//cytoplasm
Unigene25648_All	2094	ko00970//Aminoacyl-tRNA biosynthesis	Genetic Information Processing	Translation	-1.22942	2.61799e-10	1.03323e-10	K01889//phenylalanyl-tRNA synthetase alpha chain [EC:6.1.1.20]+ko00970//Aminoacyl-tRNA biosynthesis;K01889//phenylalanyl-tRNA synthetase alpha chain [EC:6.1.1.20]+ko00970//Aminoacyl-tRNA biosynthesis;K01889//phenylalanyl-tRNA synthetase alpha chain [EC:6.1.1.20]+ko00970//Aminoacyl-tRNA biosynthesis	tRNA synthetases class II core domain (F)		Phenylalanyl-tRNA synthetase, alpha subunit (plastid) [Paulinella micropora]	[J] KOG2783 Phenylalanyl-tRNA synthetase	Phenylalanine--tRNA ligase alpha subunit, cytoplasmic OS=Arabidopsis thaliana GN=At4g39280 PE=2 SV=3	GO:0006432//phenylalanyl-tRNA aminoacylation;GO:0004826//phenylalanine-tRNA ligase activity;GO:0005524//ATP binding;GO:0000049//tRNA binding;GO:0009536//plastid;GO:0005737//cytoplasm
CL6060.Contig3_All	1507	ko00330//Arginine and proline metabolism;ko00970//Aminoacyl-tRNA biosynthesis;ko00380//Tryptophan metabolism;ko01100//Metabolic pathways;ko00360//Phenylalanine metabolism	Genetic Information Processing;Metabolism	Amino acid metabolism;Global and overview maps;Translation	-1.23372	6.7074e-52	8.77132e-53	K01426//amidase [EC:3.5.1.4]+ko00380//Tryptophan metabolism+ko00330//Arginine and proline metabolism+ko00360//Phenylalanine metabolism;K01426//amidase [EC:3.5.1.4]+ko00380//Tryptophan metabolism+ko00330//Arginine and proline metabolism+ko00360//Phenylalanine metabolism;K01426//amidase [EC:3.5.1.4]+ko00380//Tryptophan metabolism+ko00330//Arginine and proline metabolism+ko00360//Phenylalanine metab…	Amidase		Glutamyl-tRNA(Gln) amidotransferase subunit A [Auxenochlorella protothecoides] >KFM23466.1 Glutamyl-tRNA(Gln) amidotransferase subunit A [Auxenochlorella protothecoides]	[J] KOG1211 Amidases	Glutamyl-tRNA(Gln) amidotransferase subunit A, chloroplastic/mitochondrial OS=Zea mays GN=GATA PE=2 SV=1	GO:0005524//ATP binding;GO:0050567//glutaminyl-tRNA synthase (glutamine-hydrolyzing) activity;GO:0030956//glutamyl-tRNA(Gln) amidotransferase complex;GO:0004040//amidase activity;GO:0032543//mitochondrial translation;GO:0005739//mitochondrion;GO:0016740//transferase activity;GO:0070681//glutaminyl-tRNAGln biosynthesis via transamidation;GO:0009570//chloroplast stroma
CL2183.Contig1_All	2760	ko00970//Aminoacyl-tRNA biosynthesis	Genetic Information Processing	Translation	-1.24499	1.12325e-168	6.18776e-170	K01881//prolyl-tRNA synthetase [EC:6.1.1.15]+ko00970//Aminoacyl-tRNA biosynthesis;K01881//prolyl-tRNA synthetase [EC:6.1.1.15]+ko00970//Aminoacyl-tRNA biosynthesis	Prolyl-tRNA synthetase, C-terminal	XM_009042587.1 Aureococcus anophagefferens hypothetical protein partial mRNA	prolyl-trna synthetase [Nannochloropsis gaditana]	[J] KOG4163 Prolyl-tRNA synthetase	Proline--tRNA ligase, cytoplasmic OS=Arabidopsis thaliana GN=At3g62120 PE=1 SV=1	GO:0006433//prolyl-tRNA aminoacylation;GO:0005524//ATP binding;GO:0002161//aminoacyl-tRNA editing activity;GO:0005737//cytoplasm;GO:0004827//proline-tRNA ligase activity
CL4678.Contig1_All	3835	ko00970//Aminoacyl-tRNA biosynthesis	Genetic Information Processing	Translation	-1.2523	0	0	K01873//valyl-tRNA synthetase [EC:6.1.1.9]+ko00970//Aminoacyl-tRNA biosynthesis	tRNA synthetases class I (I, L, M and V)	XM_009518604.1 Phytophthora sojae hypothetical protein partial mRNA	Valine--tRNA ligase [Ectocarpus siliculosus]	[J] KOG0432 Valyl-tRNA synthetase	Valine--tRNA ligase, chloroplastic/mitochondrial 2 OS=Arabidopsis thaliana GN=EMB2247 PE=3 SV=1
CL8974.Contig1_All	1959	ko00970//Aminoacyl-tRNA biosynthesis	Genetic Information Processing	Translation	-1.26307	2.06226e-222	9.07101e-224	K01893//asparaginyl-tRNA synthetase [EC:6.1.1.22]+ko00970//Aminoacyl-tRNA biosynthesis;K01893//asparaginyl-tRNA synthetase [EC:6.1.1.22]+ko00970//Aminoacyl-tRNA biosynthesis;K01893//asparaginyl-tRNA synthetase [EC:6.1.1.22]+ko00970//Aminoacyl-tRNA biosynthesis;K01893//asparaginyl-tRNA synthetase [EC:6.1.1.22]+ko00970//Aminoacyl-tRNA biosynthesis	tRNA synthetases class II (D, K and N)	XM_009532121.1 Phytophthora sojae hypothetical protein mRNA	Asparaginyl-tRNA Synthetase [Ectocarpus siliculosus]	[J] KOG0554 Asparaginyl-tRNA synthetase (mitochondrial)	Asparagine--tRNA ligase, cytoplasmic 3 OS=Arabidopsis thaliana GN=SYNC3 PE=1 SV=1	GO:0006421//asparaginyl-tRNA aminoacylation;GO:0005524//ATP binding;GO:0004816//asparagine-tRNA ligase activity;GO:0005737//cytoplasm;GO:0003676//nucleic acid binding
CL6060.Contig2_All	1956	ko00330//Arginine and proline metabolism;ko00970//Aminoacyl-tRNA biosynthesis;ko00360//Phenylalanine metabolism;ko00380//Tryptophan metabolism;ko01100//Metabolic pathways	Metabolism;Genetic Information Processing	Global and overview maps;Translation;Amino acid metabolism	-1.26369	9.4333e-11	3.62776e-11	K01426//amidase [EC:3.5.1.4]+ko00380//Tryptophan metabolism+ko00330//Arginine and proline metabolism+ko00360//Phenylalanine metabolism;K01426//amidase [EC:3.5.1.4]+ko00380//Tryptophan metabolism+ko00330//Arginine and proline metabolism+ko00360//Phenylalanine metabolism;K01426//amidase [EC:3.5.1.4]+ko00380//Tryptophan metabolism+ko00330//Arginine and proline metabolism+ko00360//Phenylalanine metab…	Amidase		Glutamyl-tRNA(Gln) amidotransferase subunit A [Auxenochlorella protothecoides] >KFM23466.1 Glutamyl-tRNA(Gln) amidotransferase subunit A [Auxenochlorella protothecoides]	[J] KOG1211 Amidases	Glutamyl-tRNA(Gln) amidotransferase subunit A, chloroplastic/mitochondrial OS=Zea mays GN=GATA PE=2 SV=1	GO:0005524//ATP binding;GO:0050567//glutaminyl-tRNA synthase (glutamine-hydrolyzing) activity;GO:0030956//glutamyl-tRNA(Gln) amidotransferase complex;GO:0004040//amidase activity;GO:0032543//mitochondrial translation;GO:0005739//mitochondrion;GO:0016740//transferase activity;GO:0070681//glutaminyl-tRNAGln biosynthesis via transamidation;GO:0009570//chloroplast stroma
Unigene33515_All	1015	ko01100//Metabolic pathways;ko00970//Aminoacyl-tRNA biosynthesis	Genetic Information Processing;Metabolism	Translation;Global and overview maps	-1.28686	1.14292e-20	2.83312e-21	K02433//aspartyl-tRNA(Asn)/glutamyl-tRNA(Gln) amidotransferase subunit A [EC:6.3.5.6 6.3.5.7]+ko00970//Aminoacyl-tRNA biosynthesis+ko01100//Metabolic pathways;K19996//phosphatidylinositol transfer protein SFH5;K19996//phosphatidylinositol transfer protein SFH5;K19996//phosphatidylinositol transfer protein SFH5;K19996//phosphatidylinositol transfer protein SFH5	CRAL/TRIO domain		kinesin-like protein kif6-like protein [Chrysochromulina sp. CCMP291]	[I] KOG1471 Phosphatidylinositol transfer protein SEC14 and related proteins	Phosphatidylinositol/phosphatidylcholine transfer protein SFH4 OS=Arabidopsis thaliana GN=SFH4 PE=2 SV=1	GO:0005622//intracellular;GO:0005215//transporter activity
Unigene25772_All	2240	ko00970//Aminoacyl-tRNA biosynthesis	Genetic Information Processing	Translation	-1.32297	3.16541e-11	1.17969e-11	K01876//aspartyl-tRNA synthetase [EC:6.1.1.12]+ko00970//Aminoacyl-tRNA biosynthesis;K01876//aspartyl-tRNA synthetase [EC:6.1.1.12]+ko00970//Aminoacyl-tRNA biosynthesis;K01876//aspartyl-tRNA synthetase [EC:6.1.1.12]+ko00970//Aminoacyl-tRNA biosynthesis;K01876//aspartyl-tRNA synthetase [EC:6.1.1.12]+ko00970//Aminoacyl-tRNA biosynthesis;K01876//aspartyl-tRNA synthetase [EC:6.1.1.12]+ko00970//Aminoac…	tRNA synthetases class II (D, K and N)		Aspartate--tRNA ligase [Symbiodinium microadriaticum]	[J] KOG2411 Aspartyl-tRNA synthetase, mitochondrial	Lysine--tRNA ligase OS=Oryza sativa subsp. japonica GN=Os03g0586800 PE=2 SV=1	GO:0016020//membrane;GO:0005524//ATP binding;GO:0006418//tRNA aminoacylation for protein translation;GO:0004812//aminoacyl-tRNA ligase activity;GO:0005739//mitochondrion;GO:0009536//plastid;GO:0003676//nucleic acid binding;GO:0009507//chloroplast
Unigene37210_All	2860	ko00970//Aminoacyl-tRNA biosynthesis;ko00450//Selenocompound metabolism	Genetic Information Processing;Metabolism	Metabolism of other amino acids;Translation	-1.35258	7.80972e-13	2.66473e-13	K01874//methionyl-tRNA synthetase [EC:6.1.1.10]+ko00970//Aminoacyl-tRNA biosynthesis+ko00450//Selenocompound metabolism;K01874//methionyl-tRNA synthetase [EC:6.1.1.10]+ko00970//Aminoacyl-tRNA biosynthesis+ko00450//Selenocompound metabolism;K01874//methionyl-tRNA synthetase [EC:6.1.1.10]+ko00970//Aminoacyl-tRNA biosynthesis+ko00450//Selenocompound metabolism;K01874//methionyl-tRNA synthetase [EC:6…	tRNA synthetases class I (M)		methionyl-tRNA synthetase isoform 1 [Galdieria sulphuraria] >EME30721.1 methionyl-tRNA synthetase isoform 1 [Galdieria sulphuraria]	[J] KOG1247 Methionyl-tRNA synthetase	Probable methionine--tRNA ligase OS=Oryza sativa subsp. japonica GN=Os06g0508700 PE=2 SV=2	GO:0005524//ATP binding;GO:0006431//methionyl-tRNA aminoacylation;GO:0004825//methionine-tRNA ligase activity;GO:0000049//tRNA binding;GO:0005737//cytoplasm
CL2071.Contig1_All	4281	ko00450//Selenocompound metabolism;ko00970//Aminoacyl-tRNA biosynthesis	Genetic Information Processing;Metabolism	Translation;Metabolism of other amino acids	-1.36565	2.16713e-44	3.16e-45	K01874//methionyl-tRNA synthetase [EC:6.1.1.10]+ko00970//Aminoacyl-tRNA biosynthesis+ko00450//Selenocompound metabolism;K01874//methionyl-tRNA synthetase [EC:6.1.1.10]+ko00970//Aminoacyl-tRNA biosynthesis+ko00450//Selenocompound metabolism;K01874//methionyl-tRNA synthetase [EC:6.1.1.10]+ko00970//Aminoacyl-tRNA biosynthesis+ko00450//Selenocompound metabolism;K01874//methionyl-tRNA synthetase [EC:6…	tRNA synthetases class I (M)	XM_009039856.1 Aureococcus anophagefferens hypothetical protein mRNA	Methionine--tRNA ligase [Ectocarpus siliculosus]	[J] KOG0436 Methionyl-tRNA synthetase	Extensin OS=Nicotiana tabacum GN=HRGPNT3 PE=2 SV=1	GO:0005524//ATP binding;GO:0006431//methionyl-tRNA aminoacylation;GO:0004825//methionine-tRNA ligase activity;GO:0000049//tRNA binding;GO:0005737//cytoplasm
CL885.Contig3_All	1606	ko00970//Aminoacyl-tRNA biosynthesis	Genetic Information Processing	Translation	-1.39039	7.30033e-07	3.74585e-07	K01889//phenylalanyl-tRNA synthetase alpha chain [EC:6.1.1.20]+ko00970//Aminoacyl-tRNA biosynthesis;K01889//phenylalanyl-tRNA synthetase alpha chain [EC:6.1.1.20]+ko00970//Aminoacyl-tRNA biosynthesis;K01889//phenylalanyl-tRNA synthetase alpha chain [EC:6.1.1.20]+ko00970//Aminoacyl-tRNA biosynthesis;K01889//phenylalanyl-tRNA synthetase alpha chain [EC:6.1.1.20]+ko00970//Aminoacyl-tRNA biosynthesis…	tRNA synthetases class II core domain (F)		Phenylalanine--tRNA ligase [Ectocarpus siliculosus]	[J] KOG2783 Phenylalanyl-tRNA synthetase	Phenylalanine--tRNA ligase, chloroplastic/mitochondrial OS=Arabidopsis thaliana GN=At3g58140 PE=1 SV=1	GO:0006432//phenylalanyl-tRNA aminoacylation;GO:0004826//phenylalanine-tRNA ligase activity;GO:0005524//ATP binding;GO:0000049//tRNA binding;GO:0005737//cytoplasm
Unigene135_All	2592	ko00970//Aminoacyl-tRNA biosynthesis	Genetic Information Processing	Translation	-1.39781	6.52936e-17	1.86502e-17	K01870//isoleucyl-tRNA synthetase [EC:6.1.1.5]+ko00970//Aminoacyl-tRNA biosynthesis;K01870//isoleucyl-tRNA synthetase [EC:6.1.1.5]+ko00970//Aminoacyl-tRNA biosynthesis	tRNA synthetases class I (I, L, M and V)		hypothetical protein SELMODRAFT_153639 [Selaginella moellendorffii] >EFJ18943.1 hypothetical protein SELMODRAFT_153639 [Selaginella moellendorffii]	[J] KOG0434 Isoleucyl-tRNA synthetase	Valine--tRNA ligase, chloroplastic/mitochondrial 2 OS=Arabidopsis thaliana GN=EMB2247 PE=3 SV=1	GO:0005524//ATP binding;GO:0002161//aminoacyl-tRNA editing activity;GO:0006428//isoleucyl-tRNA aminoacylation;GO:0000049//tRNA binding;GO:0005737//cytoplasm;GO:0004822//isoleucine-tRNA ligase activity
CL8772.Contig2_All	984	ko00450//Selenocompound metabolism;ko00970//Aminoacyl-tRNA biosynthesis	Genetic Information Processing;Metabolism	Metabolism of other amino acids;Translation	-1.40004	0.000935903	0.000714042	K03341//O-phospho-L-seryl-tRNASec:L-selenocysteinyl-tRNA synthase [EC:2.9.1.2]+ko00970//Aminoacyl-tRNA biosynthesis+ko00450//Selenocompound metabolism;K03341//O-phospho-L-seryl-tRNASec:L-selenocysteinyl-tRNA synthase [EC:2.9.1.2]+ko00970//Aminoacyl-tRNA biosynthesis+ko00450//Selenocompound metabolism;K03341//O-phospho-L-seryl-tRNASec:L-selenocysteinyl-tRNA synthase [EC:2.9.1.2]+ko00970//Aminoacyl…	O-phosphoseryl-tRNA(Sec) selenium transferase, SepSecS		O-phosphoseryl-tRNA(Sec) selenium transferase [Aphanomyces astaci] >ETV89171.1 O-phosphoseryl-tRNA(Sec) selenium transferase [Aphanomyces astaci]	[J] KOG3843 Predicted serine hydroxymethyltransferase SLA/LP (autoimmune hepatitis marker in humans)		GO:0016785//transferase activity, transferring selenium-containing groups;GO:0006412//translation;GO:0097056//selenocysteinyl-tRNA(Sec) biosynthetic process;GO:0016021//integral component of membrane;GO:0000049//tRNA binding;GO:0005737//cytoplasm
Unigene32596_All	1305	ko01110//Biosynthesis of secondary metabolites;ko01100//Metabolic pathways;ko00860//Porphyrin and chlorophyll metabolism;ko00970//Aminoacyl-tRNA biosynthesis	Genetic Information Processing;Metabolism	Global and overview maps;Metabolism of cofactors and vitamins;Translation	-1.41773	3.68564e-05	2.28186e-05	K01885//glutamyl-tRNA synthetase [EC:6.1.1.17]+ko00860//Porphyrin and chlorophyll metabolism+ko00970//Aminoacyl-tRNA biosynthesis+ko01100//Metabolic pathways+ko01110//Biosynthesis of secondary metabolites;K01885//glutamyl-tRNA synthetase [EC:6.1.1.17]+ko00860//Porphyrin and chlorophyll metabolism+ko00970//Aminoacyl-tRNA biosynthesis+ko01100//Metabolic pathways+ko01110//Biosynthesis of secondary m…	tRNA synthetases class I (E and Q), catalytic domain		glutamate-tRNA ligase [Aphanomyces invadans] >ETW00374.1 glutamate-tRNA ligase [Aphanomyces invadans]	[J] KOG1149 Glutamyl-tRNA synthetase (mitochondrial)	Glutamate--tRNA ligase, chloroplastic/mitochondrial OS=Nicotiana tabacum PE=2 SV=1	GO:0005524//ATP binding;GO:0006424//glutamyl-tRNA aminoacylation;GO:0008270//zinc ion binding;GO:0000049//tRNA binding;GO:0005737//cytoplasm;GO:0004818//glutamate-tRNA ligase activity
Unigene37044_All	4069	ko00970//Aminoacyl-tRNA biosynthesis	Genetic Information Processing	Translation	-1.48578	7.24413e-20	1.84569e-20	K01893//asparaginyl-tRNA synthetase [EC:6.1.1.22]+ko00970//Aminoacyl-tRNA biosynthesis;K01893//asparaginyl-tRNA synthetase [EC:6.1.1.22]+ko00970//Aminoacyl-tRNA biosynthesis;K01893//asparaginyl-tRNA synthetase [EC:6.1.1.22]+ko00970//Aminoacyl-tRNA biosynthesis;K01893//asparaginyl-tRNA synthetase [EC:6.1.1.22]+ko00970//Aminoacyl-tRNA biosynthesis;K01893//asparaginyl-tRNA synthetase [EC:6.1.1.22]+k…	tRNA synthetases class II (D, K and N)	XM_011083096.2 PREDICTED: Sesamum indicum asparagine--tRNA ligase, chloroplastic/mitochondrial (LOC105164446), transcript variant X2, mRNA	Aspartyl/Asparaginyl-tRNA synthetase class IIb [Klebsormidium nitens]	[J] KOG0554 Asparaginyl-tRNA synthetase (mitochondrial)	Asparagine--tRNA ligase, chloroplastic/mitochondrial OS=Arabidopsis thaliana GN=SYNO PE=2 SV=3	GO:0006421//asparaginyl-tRNA aminoacylation;GO:0005524//ATP binding;GO:0004816//asparagine-tRNA ligase activity;GO:0005737//cytoplasm;GO:0003676//nucleic acid binding
CL1504.Contig13_All	2419	ko00970//Aminoacyl-tRNA biosynthesis	Genetic Information Processing	Translation	-1.51638	5.67492e-170	3.10679e-171	K01872//alanyl-tRNA synthetase [EC:6.1.1.7]+ko00970//Aminoacyl-tRNA biosynthesis;K01872//alanyl-tRNA synthetase [EC:6.1.1.7]+ko00970//Aminoacyl-tRNA biosynthesis;K01872//alanyl-tRNA synthetase [EC:6.1.1.7]+ko00970//Aminoacyl-tRNA biosynthesis;K01872//alanyl-tRNA synthetase [EC:6.1.1.7]+ko00970//Aminoacyl-tRNA biosynthesis;K01872//alanyl-tRNA synthetase [EC:6.1.1.7]+ko00970//Aminoacyl-tRNA biosynt…	tRNA synthetases class II (A)	XM_009517811.1 Phytophthora sojae hypothetical protein partial mRNA	Alanyl-tRNA Synthetase [Ectocarpus siliculosus]	[J] KOG0188 Alanyl-tRNA synthetase	Alanine--tRNA ligase OS=Arabidopsis thaliana GN=ALATS PE=1 SV=3	GO:0016597//amino acid binding;GO:0005524//ATP binding;GO:0000049//tRNA binding;GO:0006400//tRNA modification;GO:0008270//zinc ion binding;GO:0005739//mitochondrion;GO:0070143//mitochondrial alanyl-tRNA aminoacylation;GO:0006419//alanyl-tRNA aminoacylation;GO:0004813//alanine-tRNA ligase activity
Unigene5960_All	4055	ko00970//Aminoacyl-tRNA biosynthesis	Genetic Information Processing	Translation	-1.55493	0	0	K01892//histidyl-tRNA synthetase [EC:6.1.1.21]+ko00970//Aminoacyl-tRNA biosynthesis;K01892//histidyl-tRNA synthetase [EC:6.1.1.21]+ko00970//Aminoacyl-tRNA biosynthesis;K01892//histidyl-tRNA synthetase [EC:6.1.1.21]+ko00970//Aminoacyl-tRNA biosynthesis	Amino acid kinase family	XM_014051081.1 Monoraphidium neglectum histidyl-tRNA synthetase mRNA	hypothetical protein THAOC_23204, partial [Thalassiosira oceanica]	[J] KOG1936 Histidyl-tRNA synthetase	Aspartokinase 3, chloroplastic OS=Arabidopsis thaliana GN=AK3 PE=1 SV=1	GO:0004821//histidine-tRNA ligase activity;GO:0005524//ATP binding;GO:0006427//histidyl-tRNA aminoacylation;GO:0005737//cytoplasm
Unigene21816_All	2572	ko00970//Aminoacyl-tRNA biosynthesis	Genetic Information Processing	Translation	-1.56762	5.23418e-28	1.06125e-28	K01883//cysteinyl-tRNA synthetase [EC:6.1.1.16]+ko00970//Aminoacyl-tRNA biosynthesis;K01883//cysteinyl-tRNA synthetase [EC:6.1.1.16]+ko00970//Aminoacyl-tRNA biosynthesis;K01883//cysteinyl-tRNA synthetase [EC:6.1.1.16]+ko00970//Aminoacyl-tRNA biosynthesis;K01883//cysteinyl-tRNA synthetase [EC:6.1.1.16]+ko00970//Aminoacyl-tRNA biosynthesis;K01883//cysteinyl-tRNA synthetase [EC:6.1.1.16]+ko00970//Am…	tRNA synthetases class I (C) catalytic domain		PREDICTED: cysteine--tRNA ligase, chloroplastic/mitochondrial isoform X1 [Vitis vinifera]	[J] KOG2007 Cysteinyl-tRNA synthetase	Cysteine--tRNA ligase, chloroplastic/mitochondrial OS=Arabidopsis thaliana GN=SYCO PE=2 SV=1	GO:0004817//cysteine-tRNA ligase activity;GO:0006423//cysteinyl-tRNA aminoacylation;GO:0005524//ATP binding;GO:0005737//cytoplasm
Unigene46517_All	1064	ko00970//Aminoacyl-tRNA biosynthesis	Genetic Information Processing	Translation	-1.58695	0.000121369	8.06295e-05	K01872//alanyl-tRNA synthetase [EC:6.1.1.7]+ko00970//Aminoacyl-tRNA biosynthesis;K01872//alanyl-tRNA synthetase [EC:6.1.1.7]+ko00970//Aminoacyl-tRNA biosynthesis;K01872//alanyl-tRNA synthetase [EC:6.1.1.7]+ko00970//Aminoacyl-tRNA biosynthesis;K01872//alanyl-tRNA synthetase [EC:6.1.1.7]+ko00970//Aminoacyl-tRNA biosynthesis;K01872//alanyl-tRNA synthetase [EC:6.1.1.7]+ko00970//Aminoacyl-tRNA biosynt…	tRNA synthetases class II (A)		predicted protein [Physcomitrella patens] >EDQ61577.1 predicted protein [Physcomitrella patens]	[J] KOG0188 Alanyl-tRNA synthetase	Alanine--tRNA ligase OS=Arabidopsis thaliana GN=ALATS PE=1 SV=3	GO:0005524//ATP binding;GO:0016597//amino acid binding;GO:0000049//tRNA binding;GO:0005829//cytosol;GO:0006400//tRNA modification;GO:0008270//zinc ion binding;GO:0070143//mitochondrial alanyl-tRNA aminoacylation;GO:0005739//mitochondrion;GO:0006419//alanyl-tRNA aminoacylation;GO:0009507//chloroplast;GO:0004813//alanine-tRNA ligase activity
Unigene48624_All	1322	ko00970//Aminoacyl-tRNA biosynthesis	Genetic Information Processing	Translation	-1.69142	1.45135e-33	2.60493e-34	K01883//cysteinyl-tRNA synthetase [EC:6.1.1.16]+ko00970//Aminoacyl-tRNA biosynthesis;K01883//cysteinyl-tRNA synthetase [EC:6.1.1.16]+ko00970//Aminoacyl-tRNA biosynthesis	Domain of unknown function (DUF4191)		Cysteinyl-tRNA synthetase/mycothiol ligase, partial [Ostreococcus tauri]	[J] KOG2007 Cysteinyl-tRNA synthetase	Formin-like protein 18 OS=Oryza sativa subsp. japonica GN=FH18 PE=2 SV=1	GO:0004817//cysteine-tRNA ligase activity;GO:0006423//cysteinyl-tRNA aminoacylation;GO:0005524//ATP binding;GO:0005737//cytoplasm
Unigene5125_All	2721	ko00970//Aminoacyl-tRNA biosynthesis;ko01100//Metabolic pathways	Metabolism;Genetic Information Processing	Global and overview maps;Translation	-1.72166	1.51487e-63	1.71228e-64	K02433//aspartyl-tRNA(Asn)/glutamyl-tRNA(Gln) amidotransferase subunit A [EC:6.3.5.6 6.3.5.7]+ko00970//Aminoacyl-tRNA biosynthesis+ko01100//Metabolic pathways;K19996//phosphatidylinositol transfer protein SFH5;K19996//phosphatidylinositol transfer protein SFH5;K19996//phosphatidylinositol transfer protein SFH5	CRAL/TRIO domain		unnamed protein product [Albugo candida]	[I] KOG1471 Phosphatidylinositol transfer protein SEC14 and related proteins	Patellin-4 OS=Arabidopsis thaliana GN=PATL4 PE=1 SV=2	GO:0016021//integral component of membrane
Unigene41351_All	1317	ko00970//Aminoacyl-tRNA biosynthesis	Genetic Information Processing	Translation	-1.79522	2.25509e-12	7.88004e-13	K01892//histidyl-tRNA synthetase [EC:6.1.1.21]+ko00970//Aminoacyl-tRNA biosynthesis;K01892//histidyl-tRNA synthetase [EC:6.1.1.21]+ko00970//Aminoacyl-tRNA biosynthesis;K01892//histidyl-tRNA synthetase [EC:6.1.1.21]+ko00970//Aminoacyl-tRNA biosynthesis;K01892//histidyl-tRNA synthetase [EC:6.1.1.21]+ko00970//Aminoacyl-tRNA biosynthesis;K01892//histidyl-tRNA synthetase [EC:6.1.1.21]+ko00970//Aminoac…	Histidyl-tRNA synthetase		PREDICTED: histidine--tRNA ligase, cytoplasmic [Ipomoea nil]	[J] KOG1936 Histidyl-tRNA synthetase	Histidine--tRNA ligase, cytoplasmic OS=Arabidopsis thaliana GN=At3g02760 PE=2 SV=1	GO:0004821//histidine-tRNA ligase activity;GO:0005524//ATP binding;GO:0032543//mitochondrial translation;GO:0005829//cytosol;GO:0006427//histidyl-tRNA aminoacylation;GO:0005739//mitochondrion
CL10333.Contig3_All	3540	ko00970//Aminoacyl-tRNA biosynthesis	Genetic Information Processing	Translation	-1.80842	1.41891e-122	9.97391e-124	K01868//threonyl-tRNA synthetase [EC:6.1.1.3]+ko00970//Aminoacyl-tRNA biosynthesis;K01868//threonyl-tRNA synthetase [EC:6.1.1.3]+ko00970//Aminoacyl-tRNA biosynthesis;K01868//threonyl-tRNA synthetase [EC:6.1.1.3]+ko00970//Aminoacyl-tRNA biosynthesis;K01868//threonyl-tRNA synthetase [EC:6.1.1.3]+ko00970//Aminoacyl-tRNA biosynthesis;K01868//threonyl-tRNA synthetase [EC:6.1.1.3]+ko00970//Aminoacyl-tR…	Ribosomal protein L20		threonyl-tRNA synthetase [Guillardia theta CCMP2712] >EKX32295.1 threonyl-tRNA synthetase [Guillardia theta CCMP2712]	[J] KOG1637 Threonyl-tRNA synthetase	Translation initiation factor IF-3, chloroplastic OS=Gracilaria tenuistipitata var. liui GN=infC PE=3 SV=1	GO:0004829//threonine-tRNA ligase activity;GO:0005524//ATP binding;GO:0006435//threonyl-tRNA aminoacylation;GO:0005737//cytoplasm
Unigene60626_All	1059	ko00970//Aminoacyl-tRNA biosynthesis;ko00670//One carbon pool by folate	Genetic Information Processing;Metabolism	Metabolism of cofactors and vitamins;Translation	-1.89239	0.000408873	0.000294612	K00604//methionyl-tRNA formyltransferase [EC:2.1.2.9]+ko00970//Aminoacyl-tRNA biosynthesis+ko00670//One carbon pool by folate;K00604//methionyl-tRNA formyltransferase [EC:2.1.2.9]+ko00970//Aminoacyl-tRNA biosynthesis+ko00670//One carbon pool by folate;K00604//methionyl-tRNA formyltransferase [EC:2.1.2.9]+ko00970//Aminoacyl-tRNA biosynthesis+ko00670//One carbon pool by folate;K00604//methionyl-tRN…	Formyl transferase		Methionyl-tRNA formyltransferase [Dorcoceras hygrometricum]	[J] KOG3082 Methionyl-tRNA formyltransferase		GO:0009536//plastid;GO:0004479//methionyl-tRNA formyltransferase activity
Unigene23541_All	1052	ko00970//Aminoacyl-tRNA biosynthesis	Genetic Information Processing	Translation	-1.89948	2.7433e-06	1.48943e-06	K01867//tryptophanyl-tRNA synthetase [EC:6.1.1.2]+ko00970//Aminoacyl-tRNA biosynthesis;K01867//tryptophanyl-tRNA synthetase [EC:6.1.1.2]+ko00970//Aminoacyl-tRNA biosynthesis;K01867//tryptophanyl-tRNA synthetase [EC:6.1.1.2]+ko00970//Aminoacyl-tRNA biosynthesis	tRNA synthetases class I (W and Y)		hypothetical protein OsI_17112 [Oryza sativa Indica Group]	[J] KOG2713 Mitochondrial tryptophanyl-tRNA synthetase	Tryptophan--tRNA ligase, chloroplastic/mitochondrial OS=Arabidopsis thaliana GN=OVA4 PE=1 SV=1	GO:0004830//tryptophan-tRNA ligase activity;GO:0005524//ATP binding;GO:0006436//tryptophanyl-tRNA aminoacylation;GO:0009536//plastid;GO:0005737//cytoplasm
Unigene44584_All	2415	ko00970//Aminoacyl-tRNA biosynthesis;ko03013//RNA transport	Genetic Information Processing	Translation	-1.94326	6.57762e-20	1.67389e-20	K03243//translation initiation factor 5B+ko03013//RNA transport;K01890//phenylalanyl-tRNA synthetase beta chain [EC:6.1.1.20]+ko00970//Aminoacyl-tRNA biosynthesis;K01890//phenylalanyl-tRNA synthetase beta chain [EC:6.1.1.20]+ko00970//Aminoacyl-tRNA biosynthesis;K01890//phenylalanyl-tRNA synthetase beta chain [EC:6.1.1.20]+ko00970//Aminoacyl-tRNA biosynthesis;K01890//phenylalanyl-tRNA synthetase b…	B3/4 domain		phenylalanyl-tRNA synthetase beta chain, putative, partial [Ricinus communis]		Phenylalanine--tRNA ligase beta subunit, chloroplastic OS=Gracilaria tenuistipitata var. liui GN=pheT PE=3 SV=1	GO:0000287//magnesium ion binding;GO:0006432//phenylalanyl-tRNA aminoacylation;GO:0004826//phenylalanine-tRNA ligase activity;GO:0005524//ATP binding;GO:0000049//tRNA binding;GO:0009536//plastid
Unigene26056_All	3639	ko00970//Aminoacyl-tRNA biosynthesis	Genetic Information Processing	Translation	-2.10873	0	0	K01869//leucyl-tRNA synthetase [EC:6.1.1.4]+ko00970//Aminoacyl-tRNA biosynthesis;K01869//leucyl-tRNA synthetase [EC:6.1.1.4]+ko00970//Aminoacyl-tRNA biosynthesis;K01869//leucyl-tRNA synthetase [EC:6.1.1.4]+ko00970//Aminoacyl-tRNA biosynthesis;K01869//leucyl-tRNA synthetase [EC:6.1.1.4]+ko00970//Aminoacyl-tRNA biosynthesis;K01869//leucyl-tRNA synthetase [EC:6.1.1.4]+ko00970//Aminoacyl-tRNA biosynt…	tRNA synthetases class I (I, L, M and V)	XM_009521231.1 Phytophthora sojae hypothetical protein partial mRNA	Leucyl-tRNA Synthetase (C-terminal region) Leucyl-tRNA Synthetase (Central region) Leucyl-tRNA Synth [Ectocarpus siliculosus]	[J] KOG0437 Leucyl-tRNA synthetase	Proline-rich receptor-like protein kinase PERK9 OS=Arabidopsis thaliana GN=PERK9 PE=1 SV=1	GO:0004823//leucine-tRNA ligase activity;GO:0004832//valine-tRNA ligase activity;GO:0005524//ATP binding;GO:0002161//aminoacyl-tRNA editing activity;GO:0006438//valyl-tRNA aminoacylation;GO:0006429//leucyl-tRNA aminoacylation;GO:0005737//cytoplasm
Unigene10165_All	4361	ko00970//Aminoacyl-tRNA biosynthesis;ko01100//Metabolic pathways	Genetic Information Processing;Metabolism	Translation;Global and overview maps	-2.17856	1.09085e-55	1.36311e-56	K01886//glutaminyl-tRNA synthetase [EC:6.1.1.18]+ko00970//Aminoacyl-tRNA biosynthesis+ko01100//Metabolic pathways;K01886//glutaminyl-tRNA synthetase [EC:6.1.1.18]+ko00970//Aminoacyl-tRNA biosynthesis+ko01100//Metabolic pathways;K01886//glutaminyl-tRNA synthetase [EC:6.1.1.18]+ko00970//Aminoacyl-tRNA biosynthesis+ko01100//Metabolic pathways;K01886//glutaminyl-tRNA synthetase [EC:6.1.1.18]+ko00970/…	tRNA synthetases class I (E and Q), catalytic domain		glutamine-trna ligase [Nannochloropsis gaditana]	[J] KOG1148 Glutaminyl-tRNA synthetase	Glutamine--tRNA ligase OS=Lupinus luteus PE=2 SV=2	GO:0005524//ATP binding;GO:0004819//glutamine-tRNA ligase activity;GO:0005737//cytoplasm;GO:0006425//glutaminyl-tRNA aminoacylation
Unigene44591_All	2025	ko00970//Aminoacyl-tRNA biosynthesis	Genetic Information Processing	Translation	-2.24829	8.12106e-91	7.09686e-92	K01881//prolyl-tRNA synthetase [EC:6.1.1.15]+ko00970//Aminoacyl-tRNA biosynthesis;K01881//prolyl-tRNA synthetase [EC:6.1.1.15]+ko00970//Aminoacyl-tRNA biosynthesis;K01881//prolyl-tRNA synthetase [EC:6.1.1.15]+ko00970//Aminoacyl-tRNA biosynthesis;K01881//prolyl-tRNA synthetase [EC:6.1.1.15]+ko00970//Aminoacyl-tRNA biosynthesis	Prolyl-tRNA synthetase, C-terminal		prolyl-trna synthetase [Nannochloropsis gaditana]	[J] KOG4163 Prolyl-tRNA synthetase	Proline--tRNA ligase, chloroplastic/mitochondrial OS=Arabidopsis thaliana GN=OVA6 PE=2 SV=1	GO:0006433//prolyl-tRNA aminoacylation;GO:0005524//ATP binding;GO:0005737//cytoplasm;GO:0005739//mitochondrion;GO:0010109//regulation of photosynthesis;GO:0009570//chloroplast stroma;GO:0017101//aminoacyl-tRNA synthetase multienzyme complex;GO:0004827//proline-tRNA ligase activity
Unigene2884_All	968	ko00970//Aminoacyl-tRNA biosynthesis;ko00670//One carbon pool by folate	Genetic Information Processing;Metabolism	Translation;Metabolism of cofactors and vitamins	-2.30742	6.27873e-05	3.99753e-05	K00604//methionyl-tRNA formyltransferase [EC:2.1.2.9]+ko00970//Aminoacyl-tRNA biosynthesis+ko00670//One carbon pool by folate;K00604//methionyl-tRNA formyltransferase [EC:2.1.2.9]+ko00970//Aminoacyl-tRNA biosynthesis+ko00670//One carbon pool by folate;K00604//methionyl-tRNA formyltransferase [EC:2.1.2.9]+ko00970//Aminoacyl-tRNA biosynthesis+ko00670//One carbon pool by folate	Formyl transferase, C-terminal domain		dTDP-4-amino-4,6-dideoxygalactose transaminase [Symbiodinium microadriaticum]	[F] KOG2452 Formyltetrahydrofolate dehydrogenase
CL49.Contig2_All	1009	ko00450//Selenocompound metabolism;ko00970//Aminoacyl-tRNA biosynthesis	Genetic Information Processing;Metabolism	Metabolism of other amino acids;Translation	-2.35633	8.5416e-06	4.89247e-06	K01874//methionyl-tRNA synthetase [EC:6.1.1.10]+ko00970//Aminoacyl-tRNA biosynthesis+ko00450//Selenocompound metabolism	tRNA synthetases class I (M)		methionine--tRNA ligase [Ostreococcus tauri]	[J] KOG1247 Methionyl-tRNA synthetase	Probable methionine--tRNA ligase OS=Oryza sativa subsp. japonica GN=Os06g0508700 PE=2 SV=2	GO:0005524//ATP binding;GO:0006418//tRNA aminoacylation for protein translation;GO:0005829//cytosol;GO:0006431//methionyl-tRNA aminoacylation;GO:0004825//methionine-tRNA ligase activity;GO:0000049//tRNA binding;GO:0005737//cytoplasm
Unigene25593_All	3710	ko00970//Aminoacyl-tRNA biosynthesis	Genetic Information Processing	Translation	-2.36831	1.11597e-95	9.38198e-97	K01887//arginyl-tRNA synthetase [EC:6.1.1.19]+ko00970//Aminoacyl-tRNA biosynthesis;K01887//arginyl-tRNA synthetase [EC:6.1.1.19]+ko00970//Aminoacyl-tRNA biosynthesis;K01887//arginyl-tRNA synthetase [EC:6.1.1.19]+ko00970//Aminoacyl-tRNA biosynthesis;K01887//arginyl-tRNA synthetase [EC:6.1.1.19]+ko00970//Aminoacyl-tRNA biosynthesis;K01887//arginyl-tRNA synthetase [EC:6.1.1.19]+ko00970//Aminoacyl-tR…	tRNA synthetases class I (R)		predicted protein [Physcomitrella patens] >EDQ75273.1 predicted protein [Physcomitrella patens]	[J] KOG1195 Arginyl-tRNA synthetase	Arginine--tRNA ligase, cytoplasmic OS=Arabidopsis thaliana GN=At1g66530 PE=1 SV=1	GO:0004814//arginine-tRNA ligase activity;GO:0005524//ATP binding;GO:0016021//integral component of membrane;GO:0006420//arginyl-tRNA aminoacylation;GO:0005737//cytoplasm
Unigene70168_All	692	ko00970//Aminoacyl-tRNA biosynthesis	Genetic Information Processing	Translation	-2.61937	0.00067086	0.000500791	K01873//valyl-tRNA synthetase [EC:6.1.1.9]+ko00970//Aminoacyl-tRNA biosynthesis	Anticodon-binding domain of tRNA		hypothetical protein EMIHUDRAFT_65763 [Emiliania huxleyi CCMP1516] >EOD17893.1 hypothetical protein EMIHUDRAFT_65763 [Emiliania huxleyi CCMP1516]	[J] KOG0432 Valyl-tRNA synthetase	Valine--tRNA ligase, mitochondrial 1 OS=Arabidopsis thaliana GN=TWN2 PE=1 SV=2	GO:0004832//valine-tRNA ligase activity;GO:0005524//ATP binding;GO:0002161//aminoacyl-tRNA editing activity;GO:0006438//valyl-tRNA aminoacylation;GO:0005737//cytoplasm
Unigene72453_All	1736	ko00970//Aminoacyl-tRNA biosynthesis	Genetic Information Processing	Translation	-2.9413	3.99522e-11	1.499e-11	K01876//aspartyl-tRNA synthetase [EC:6.1.1.12]+ko00970//Aminoacyl-tRNA biosynthesis;K01876//aspartyl-tRNA synthetase [EC:6.1.1.12]+ko00970//Aminoacyl-tRNA biosynthesis;K01876//aspartyl-tRNA synthetase [EC:6.1.1.12]+ko00970//Aminoacyl-tRNA biosynthesis;K01876//aspartyl-tRNA synthetase [EC:6.1.1.12]+ko00970//Aminoacyl-tRNA biosynthesis;K01876//aspartyl-tRNA synthetase [EC:6.1.1.12]+ko00970//Aminoac…	tRNA synthetases class II (D, K and N)		Aspartyl-tRNA synthetase [Klebsormidium nitens]	[J] KOG2411 Aspartyl-tRNA synthetase, mitochondrial	Lysine--tRNA ligase OS=Solanum lycopersicum GN=LYSRS PE=2 SV=1	GO:0005524//ATP binding;GO:0006418//tRNA aminoacylation for protein translation;GO:0004812//aminoacyl-tRNA ligase activity;GO:0005737//cytoplasm;GO:0003676//nucleic acid binding
Unigene58468_All	1138	ko01100//Metabolic pathways;ko00970//Aminoacyl-tRNA biosynthesis	Metabolism;Genetic Information Processing	Global and overview maps;Translation	-3.12187	4.83723e-16	1.43023e-16	K02434//aspartyl-tRNA(Asn)/glutamyl-tRNA(Gln) amidotransferase subunit B [EC:6.3.5.6 6.3.5.7]+ko00970//Aminoacyl-tRNA biosynthesis+ko01100//Metabolic pathways;K02434//aspartyl-tRNA(Asn)/glutamyl-tRNA(Gln) amidotransferase subunit B [EC:6.3.5.6 6.3.5.7]+ko00970//Aminoacyl-tRNA biosynthesis+ko01100//Metabolic pathways;K02434//aspartyl-tRNA(Asn)/glutamyl-tRNA(Gln) amidotransferase subunit B [EC:6.3.…	GatB/GatE catalytic domain		hypothetical protein PHYSODRAFT_482876 [Phytophthora sojae] >EGZ25876.1 hypothetical protein PHYSODRAFT_482876 [Phytophthora sojae]	[J] KOG2438 Glutamyl-tRNA amidotransferase subunit B	Glutamyl-tRNA(Gln) amidotransferase subunit B, chloroplastic/mitochondrial OS=Oryza sativa subsp. japonica GN=GATB PE=2 SV=1	GO:0005524//ATP binding;GO:0050567//glutaminyl-tRNA synthase (glutamine-hydrolyzing) activity;GO:0030956//glutamyl-tRNA(Gln) amidotransferase complex;GO:0032543//mitochondrial translation;GO:0016884//carbon-nitrogen ligase activity, with glutamine as amido-N-donor;GO:0006412//translation;GO:0070681//glutaminyl-tRNAGln biosynthesis via transamidation;GO:0009536//plastid;GO:0005739//mitochondrion;G…
Unigene63926_All	1269	ko01100//Metabolic pathways;ko00970//Aminoacyl-tRNA biosynthesis	Genetic Information Processing;Metabolism	Translation;Global and overview maps	-3.35633	7.84911e-07	4.04117e-07	K02835//peptide chain release factor 1;K02835//peptide chain release factor 1;K02835//peptide chain release factor 1;K02433//aspartyl-tRNA(Asn)/glutamyl-tRNA(Gln) amidotransferase subunit A [EC:6.3.5.6 6.3.5.7]+ko00970//Aminoacyl-tRNA biosynthesis+ko01100//Metabolic pathways	PCRF domain		hypothetical protein F511_09407 [Dorcoceras hygrometricum]	[J] KOG2726 Mitochondrial polypeptide chain release factor	Peptide chain release factor APG3, chloroplastic OS=Arabidopsis thaliana GN=APG3 PE=2 SV=1	GO:0016149//translation release factor activity, codon specific;GO:0005737//cytoplasm
Unigene59138_All	705	ko00970//Aminoacyl-tRNA biosynthesis	Genetic Information Processing	Translation	-3.49384	1.73182e-05	1.03114e-05	K01867//tryptophanyl-tRNA synthetase [EC:6.1.1.2]+ko00970//Aminoacyl-tRNA biosynthesis;K01867//tryptophanyl-tRNA synthetase [EC:6.1.1.2]+ko00970//Aminoacyl-tRNA biosynthesis	tRNA synthetases class I (W and Y)		hypothetical protein CEUSTIGMA_g88.t1 [Chlamydomonas eustigma]	[J] KOG2713 Mitochondrial tryptophanyl-tRNA synthetase	Tryptophan--tRNA ligase, chloroplastic/mitochondrial OS=Arabidopsis thaliana GN=OVA4 PE=1 SV=1	GO:0004830//tryptophan-tRNA ligase activity;GO:0005524//ATP binding;GO:0006436//tryptophanyl-tRNA aminoacylation;GO:0005737//cytoplasm
Unigene20614_All	1238	ko01100//Metabolic pathways;ko00970//Aminoacyl-tRNA biosynthesis	Genetic Information Processing;Metabolism	Global and overview maps;Translation	-3.53691	2.09041e-14	6.62811e-15	K02433//aspartyl-tRNA(Asn)/glutamyl-tRNA(Gln) amidotransferase subunit A [EC:6.3.5.6 6.3.5.7]+ko00970//Aminoacyl-tRNA biosynthesis+ko01100//Metabolic pathways;K02433//aspartyl-tRNA(Asn)/glutamyl-tRNA(Gln) amidotransferase subunit A [EC:6.3.5.6 6.3.5.7]+ko00970//Aminoacyl-tRNA biosynthesis+ko01100//Metabolic pathways;K02433//aspartyl-tRNA(Asn)/glutamyl-tRNA(Gln) amidotransferase subunit A [EC:6.3.…	Amidase		glutamyl-tRNA (Gln) amidotransferase subunit A (chromatophore) [Paulinella chromatophora] >ACB42682.1 glutamyl-tRNA (Gln) amidotransferase subunit A (chromatophore) [Paulinella chromatophora]	[J] KOG1211 Amidases	Glutamyl-tRNA(Gln) amidotransferase subunit A, chloroplastic/mitochondrial OS=Arabidopsis thaliana GN=GATA PE=2 SV=1	GO:0005524//ATP binding;GO:0050567//glutaminyl-tRNA synthase (glutamine-hydrolyzing) activity;GO:0030956//glutamyl-tRNA(Gln) amidotransferase complex;GO:0004040//amidase activity;GO:0032543//mitochondrial translation;GO:0005739//mitochondrion;GO:0009536//plastid;GO:0016740//transferase activity;GO:0070681//glutaminyl-tRNAGln biosynthesis via transamidation
Unigene58582_All	928	ko01100//Metabolic pathways;ko01110//Biosynthesis of secondary metabolites;ko00970//Aminoacyl-tRNA biosynthesis;ko00860//Porphyrin and chlorophyll metabolism	Genetic Information Processing;Metabolism	Metabolism of cofactors and vitamins;Translation;Global and overview maps	-3.67826	3.22417e-11	1.20224e-11	K01885//glutamyl-tRNA synthetase [EC:6.1.1.17]+ko00860//Porphyrin and chlorophyll metabolism+ko00970//Aminoacyl-tRNA biosynthesis+ko01100//Metabolic pathways+ko01110//Biosynthesis of secondary metabolites;K01885//glutamyl-tRNA synthetase [EC:6.1.1.17]+ko00860//Porphyrin and chlorophyll metabolism+ko00970//Aminoacyl-tRNA biosynthesis+ko01100//Metabolic pathways+ko01110//Biosynthesis of secondary m…	tRNA synthetases class I (E and Q), catalytic domain		glutamate--tRNA ligase 2 [Ostreococcus tauri]	[J] KOG1149 Glutamyl-tRNA synthetase (mitochondrial)	Glutamine--tRNA ligase, cytoplasmic OS=Arabidopsis thaliana GN=OVA9 PE=2 SV=1	GO:0005524//ATP binding;GO:0006424//glutamyl-tRNA aminoacylation;GO:0008270//zinc ion binding;GO:0000049//tRNA binding;GO:0009536//plastid;GO:0005737//cytoplasm;GO:0004818//glutamate-tRNA ligase activity
Unigene76034_All	489	ko00970//Aminoacyl-tRNA biosynthesis	Genetic Information Processing	Translation	-3.67826	2.99596e-06	1.63372e-06	K01868//threonyl-tRNA synthetase [EC:6.1.1.3]+ko00970//Aminoacyl-tRNA biosynthesis;K01868//threonyl-tRNA synthetase [EC:6.1.1.3]+ko00970//Aminoacyl-tRNA biosynthesis;K01868//threonyl-tRNA synthetase [EC:6.1.1.3]+ko00970//Aminoacyl-tRNA biosynthesis	tRNA synthetase class II core domain (G, H, P, S and T)		proline--tRNA ligase-like [Dorcoceras hygrometricum]	[J] KOG2324 Prolyl-tRNA synthetase		GO:0006433//prolyl-tRNA aminoacylation;GO:0005524//ATP binding;GO:0002161//aminoacyl-tRNA editing activity;GO:0009536//plastid;GO:0005737//cytoplasm;GO:0004827//proline-tRNA ligase activity
Unigene24793_All	1225	ko00970//Aminoacyl-tRNA biosynthesis	Genetic Information Processing	Translation	-3.79994	4.12365e-15	1.26627e-15	K14164//glycyl-tRNA synthetase [EC:6.1.1.14]+ko00970//Aminoacyl-tRNA biosynthesis;K14164//glycyl-tRNA synthetase [EC:6.1.1.14]+ko00970//Aminoacyl-tRNA biosynthesis;K14164//glycyl-tRNA synthetase [EC:6.1.1.14]+ko00970//Aminoacyl-tRNA biosynthesis;K14164//glycyl-tRNA synthetase [EC:6.1.1.14]+ko00970//Aminoacyl-tRNA biosynthesis;K14164//glycyl-tRNA synthetase [EC:6.1.1.14]+ko00970//Aminoacyl-tRNA bi…	Glycyl-tRNA synthetase alpha subunit		Glycyl-tRNA synthetase, alpha subunit (chromatophore) [Paulinella chromatophora] >ACB42530.1 Glycyl-tRNA synthetase, alpha subunit (chromatophore) [Paulinella chromatophora]		Glycine--tRNA ligase, chloroplastic/mitochondrial 2 OS=Arabidopsis thaliana GN=EDD1 PE=1 SV=1	GO:0004820//glycine-tRNA ligase activity;GO:0005524//ATP binding;GO:0006426//glycyl-tRNA aminoacylation;GO:0009536//plastid;GO:0005737//cytoplasm
CL1007.Contig4_All	2460	ko01100//Metabolic pathways;ko00970//Aminoacyl-tRNA biosynthesis	Metabolism;Genetic Information Processing	Global and overview maps;Translation	-3.82516	3.59214e-20	9.06479e-21	K02433//aspartyl-tRNA(Asn)/glutamyl-tRNA(Gln) amidotransferase subunit A [EC:6.3.5.6 6.3.5.7]+ko00970//Aminoacyl-tRNA biosynthesis+ko01100//Metabolic pathways;K02433//aspartyl-tRNA(Asn)/glutamyl-tRNA(Gln) amidotransferase subunit A [EC:6.3.5.6 6.3.5.7]+ko00970//Aminoacyl-tRNA biosynthesis+ko01100//Metabolic pathways;K02433//aspartyl-tRNA(Asn)/glutamyl-tRNA(Gln) amidotransferase subunit A [EC:6.3.…	Amidase	XM_005856112.1 Nannochloropsis gaditana CCMP526 aspartyl-tRNA(Asn)/glutamyl-tRNA (Gln) amidotransferase subunit A (GATA), partial mRNA	aspartyl-tRNA(Asn)/glutamyl-tRNA (Gln) amidotransferase subunit A [Nannochloropsis gaditana CCMP526] >EKU20195.1 aspartyl-tRNA(Asn)/glutamyl-tRNA (Gln) amidotransferase subunit A [Nannochloropsis gaditana CCMP526]	[J] KOG1211 Amidases	Glutamyl-tRNA(Gln) amidotransferase subunit A, chloroplastic/mitochondrial OS=Arabidopsis thaliana GN=GATA PE=2 SV=1	GO:0005524//ATP binding;GO:0032543//mitochondrial translation;GO:0050567//glutaminyl-tRNA synthase (glutamine-hydrolyzing) activity;GO:0070681//glutaminyl-tRNAGln biosynthesis via transamidation;GO:0016740//transferase activity;GO:0005739//mitochondrion;GO:0030956//glutamyl-tRNA(Gln) amidotransferase complex;GO:0004040//amidase activity
CL4319.Contig2_All	1382	ko00970//Aminoacyl-tRNA biosynthesis	Genetic Information Processing	Translation	-3.83142	0.000400017	0.00028774	K01875//seryl-tRNA synthetase [EC:6.1.1.11]+ko00970//Aminoacyl-tRNA biosynthesis;K01875//seryl-tRNA synthetase [EC:6.1.1.11]+ko00970//Aminoacyl-tRNA biosynthesis;K01875//seryl-tRNA synthetase [EC:6.1.1.11]+ko00970//Aminoacyl-tRNA biosynthesis;K01875//seryl-tRNA synthetase [EC:6.1.1.11]+ko00970//Aminoacyl-tRNA biosynthesis	tRNA synthetase class II core domain (G, H, P, S and T)		predicted protein, partial [Physcomitrella patens]	[J] KOG2509 Seryl-tRNA synthetase	Serine--tRNA ligase, chloroplastic/mitochondrial OS=Arabidopsis thaliana GN=OVA7 PE=2 SV=1	GO:0004828//serine-tRNA ligase activity;GO:0005524//ATP binding;GO:0006434//seryl-tRNA aminoacylation;GO:0005737//cytoplasm
Unigene59978_All	867	ko00970//Aminoacyl-tRNA biosynthesis	Genetic Information Processing	Translation	-3.84176	6.93651e-10	2.81154e-10	K01869//leucyl-tRNA synthetase [EC:6.1.1.4]+ko00970//Aminoacyl-tRNA biosynthesis;K01869//leucyl-tRNA synthetase [EC:6.1.1.4]+ko00970//Aminoacyl-tRNA biosynthesis;K01869//leucyl-tRNA synthetase [EC:6.1.1.4]+ko00970//Aminoacyl-tRNA biosynthesis;K01869//leucyl-tRNA synthetase [EC:6.1.1.4]+ko00970//Aminoacyl-tRNA biosynthesis	tRNA synthetases class I (I, L, M and V)		leucine--tRNA ligase [Ostreococcus tauri]	[J] KOG0435 Leucyl-tRNA synthetase	Leucine--tRNA ligase, chloroplastic/mitochondrial OS=Arabidopsis thaliana GN=EMB2369 PE=2 SV=1	GO:0004823//leucine-tRNA ligase activity;GO:0005524//ATP binding;GO:0002161//aminoacyl-tRNA editing activity;GO:0006429//leucyl-tRNA aminoacylation
Unigene73368_All	3125	ko00970//Aminoacyl-tRNA biosynthesis	Genetic Information Processing	Translation	-3.84176	4.12477e-27	8.54311e-28	K01872//alanyl-tRNA synthetase [EC:6.1.1.7]+ko00970//Aminoacyl-tRNA biosynthesis;K01872//alanyl-tRNA synthetase [EC:6.1.1.7]+ko00970//Aminoacyl-tRNA biosynthesis;K01872//alanyl-tRNA synthetase [EC:6.1.1.7]+ko00970//Aminoacyl-tRNA biosynthesis;K01872//alanyl-tRNA synthetase [EC:6.1.1.7]+ko00970//Aminoacyl-tRNA biosynthesis	tRNA synthetases class II (A)		alas protein [Ostreococcus tauri]	[J] KOG0188 Alanyl-tRNA synthetase	Alanine--tRNA ligase, chloroplastic/mitochondrial OS=Oryza sativa subsp. indica GN=OsI_22356 PE=3 SV=1	GO:0016597//amino acid binding;GO:0005524//ATP binding;GO:0000049//tRNA binding;GO:0046872//metal ion binding;GO:0006400//tRNA modification;GO:0005739//mitochondrion;GO:0006419//alanyl-tRNA aminoacylation;GO:0009507//chloroplast;GO:0004813//alanine-tRNA ligase activity
Unigene72927_All	1675	ko00970//Aminoacyl-tRNA biosynthesis	Genetic Information Processing	Translation	-4.10049	1.40217e-15	4.22366e-16	K01892//histidyl-tRNA synthetase [EC:6.1.1.21]+ko00970//Aminoacyl-tRNA biosynthesis;K01892//histidyl-tRNA synthetase [EC:6.1.1.21]+ko00970//Aminoacyl-tRNA biosynthesis;K01892//histidyl-tRNA synthetase [EC:6.1.1.21]+ko00970//Aminoacyl-tRNA biosynthesis;K01892//histidyl-tRNA synthetase [EC:6.1.1.21]+ko00970//Aminoacyl-tRNA biosynthesis;K01892//histidyl-tRNA synthetase [EC:6.1.1.21]+ko00970//Aminoac…	Histidyl-tRNA synthetase		histidyl-tRNA synthetase [Coccomyxa subellipsoidea C-169] >EIE21385.1 histidyl-tRNA synthetase [Coccomyxa subellipsoidea C-169]	[J] KOG1936 Histidyl-tRNA synthetase	Histidine--tRNA ligase, chloroplastic OS=Porphyra purpurea GN=hisS PE=3 SV=1	GO:0004821//histidine-tRNA ligase activity;GO:0005524//ATP binding;GO:0006427//histidyl-tRNA aminoacylation;GO:0005737//cytoplasm
Unigene64809_All	648	ko00970//Aminoacyl-tRNA biosynthesis	Genetic Information Processing	Translation	-4.20433	3.54307e-05	2.18945e-05	K01873//valyl-tRNA synthetase [EC:6.1.1.9]+ko00970//Aminoacyl-tRNA biosynthesis;K01873//valyl-tRNA synthetase [EC:6.1.1.9]+ko00970//Aminoacyl-tRNA biosynthesis;K01873//valyl-tRNA synthetase [EC:6.1.1.9]+ko00970//Aminoacyl-tRNA biosynthesis;K01873//valyl-tRNA synthetase [EC:6.1.1.9]+ko00970//Aminoacyl-tRNA biosynthesis	tRNA synthetases class I (I, L, M and V)	XM_002508255.1 Micromonas commoda predicted protein partial mRNA	hypothetical protein CEUSTIGMA_g4857.t1 [Chlamydomonas eustigma]	[J] KOG0432 Valyl-tRNA synthetase	Valine--tRNA ligase, chloroplastic/mitochondrial 2 OS=Arabidopsis thaliana GN=EMB2247 PE=3 SV=1	GO:0004832//valine-tRNA ligase activity;GO:0005524//ATP binding;GO:0002161//aminoacyl-tRNA editing activity;GO:0006438//valyl-tRNA aminoacylation;GO:0005737//cytoplasm
CL4319.Contig1_All	1505	ko00970//Aminoacyl-tRNA biosynthesis	Genetic Information Processing	Translation	-4.24775	2.36379e-09	9.9238e-10	K01875//seryl-tRNA synthetase [EC:6.1.1.11]+ko00970//Aminoacyl-tRNA biosynthesis;K01875//seryl-tRNA synthetase [EC:6.1.1.11]+ko00970//Aminoacyl-tRNA biosynthesis;K01875//seryl-tRNA synthetase [EC:6.1.1.11]+ko00970//Aminoacyl-tRNA biosynthesis;K01875//seryl-tRNA synthetase [EC:6.1.1.11]+ko00970//Aminoacyl-tRNA biosynthesis	tRNA synthetase class II core domain (G, H, P, S and T)		hypothetical protein GUITHDRAFT_176846 [Guillardia theta CCMP2712] >EKX48948.1 hypothetical protein GUITHDRAFT_176846 [Guillardia theta CCMP2712]	[J] KOG2509 Seryl-tRNA synthetase	Serine--tRNA ligase, chloroplastic/mitochondrial OS=Arabidopsis thaliana GN=OVA7 PE=2 SV=1	GO:0004828//serine-tRNA ligase activity;GO:0005524//ATP binding;GO:0006434//seryl-tRNA aminoacylation;GO:0005737//cytoplasm
Unigene64718_All	241	ko00970//Aminoacyl-tRNA biosynthesis	Genetic Information Processing	Translation	-4.49384	0.000965735	0.000743173	K14164//glycyl-tRNA synthetase [EC:6.1.1.14]+ko00970//Aminoacyl-tRNA biosynthesis;K14164//glycyl-tRNA synthetase [EC:6.1.1.14]+ko00970//Aminoacyl-tRNA biosynthesis;K14164//glycyl-tRNA synthetase [EC:6.1.1.14]+ko00970//Aminoacyl-tRNA biosynthesis;K14164//glycyl-tRNA synthetase [EC:6.1.1.14]+ko00970//Aminoacyl-tRNA biosynthesis;K14164//glycyl-tRNA synthetase [EC:6.1.1.14]+ko00970//Aminoacyl-tRNA bi…			glycine--tRNA ligase, putative [Ricinus communis]		Glycine--tRNA ligase, chloroplastic/mitochondrial 2 OS=Arabidopsis thaliana GN=EDD1 PE=1 SV=1	GO:0004820//glycine-tRNA ligase activity;GO:0005524//ATP binding;GO:0006426//glycyl-tRNA aminoacylation;GO:0009536//plastid
Unigene69512_All	656	ko00970//Aminoacyl-tRNA biosynthesis	Genetic Information Processing	Translation	-4.49384	0.000965735	0.000743173	K14164//glycyl-tRNA synthetase [EC:6.1.1.14]+ko00970//Aminoacyl-tRNA biosynthesis;K14164//glycyl-tRNA synthetase [EC:6.1.1.14]+ko00970//Aminoacyl-tRNA biosynthesis	Glycyl-tRNA synthetase beta subunit		Glycine-tRNA ligase, alpha subunit [Ostreococcus tauri]		Anther-specific proline-rich protein APG OS=Arabidopsis thaliana GN=APG PE=2 SV=2	GO:0004820//glycine-tRNA ligase activity;GO:0005524//ATP binding;GO:0006426//glycyl-tRNA aminoacylation;GO:0005737//cytoplasm
Unigene62586_All	523	ko00970//Aminoacyl-tRNA biosynthesis	Genetic Information Processing	Translation	-4.61937	0.000536232	0.000394685	K01883//cysteinyl-tRNA synthetase [EC:6.1.1.16]+ko00970//Aminoacyl-tRNA biosynthesis;K01883//cysteinyl-tRNA synthetase [EC:6.1.1.16]+ko00970//Aminoacyl-tRNA biosynthesis	tRNA synthetases class I (C) catalytic domain		cysteinyl-tRNA synthetase (chromatophore) [Paulinella chromatophora] >ACB42485.1 cysteinyl-tRNA synthetase (chromatophore) [Paulinella chromatophora]	[J] KOG2007 Cysteinyl-tRNA synthetase	Cysteine--tRNA ligase CPS1, chloroplastic/mitochondrial OS=Zea mays GN=CPS1 PE=2 SV=1	GO:0004817//cysteine-tRNA ligase activity;GO:0006423//cysteinyl-tRNA aminoacylation;GO:0005524//ATP binding;GO:0009536//plastid;GO:0005737//cytoplasm
Unigene78460_All	229	ko00970//Aminoacyl-tRNA biosynthesis	Genetic Information Processing	Translation	-4.61937	0.000536232	0.000394685	K01868//threonyl-tRNA synthetase [EC:6.1.1.3]+ko00970//Aminoacyl-tRNA biosynthesis
Unigene20884_All	432	ko00710//Carbon fixation in photosynthetic organisms;ko01230//Biosynthesis of amino acids;ko01100//Metabolic pathways;ko00010//Glycolysis / Gluconeogenesis;ko01110//Biosynthesis of secondary metabolites;ko01200//Carbon metabolism;ko00970//Aminoacyl-tRNA biosynthesis	Metabolism;Genetic Information Processing	Global and overview maps;Carbohydrate metabolism;Energy metabolism;Translation	-4.73484	0.000298398	0.000210881	K01869//leucyl-tRNA synthetase [EC:6.1.1.4]+ko00970//Aminoacyl-tRNA biosynthesis;K00134//glyceraldehyde 3-phosphate dehydrogenase [EC:1.2.1.12]+ko00010//Glycolysis / Gluconeogenesis+ko01230//Biosynthesis of amino acids+ko01100//Metabolic pathways+ko01110//Biosynthesis of secondary metabolites+ko00710//Carbon fixation in photosynthetic organisms+ko01200//Carbon metabolism;K00134//glyceraldehyde 3-…	Glyceraldehyde 3-phosphate dehydrogenase, C-terminal domain	KT588859.1 Monomorphina parapyrum culture-collection UTEX:2354 glyceraldehyde 3-phosphate dehydrogenase mRNA, partial cds	glyceraldehyde 3-phosphate dehydrogenase [Thalassiosira pseudonana CCMP1335] >EED91881.1 glyceraldehyde 3-phosphate dehydrogenase [Thalassiosira pseudonana CCMP1335]	[G] KOG0657 Glyceraldehyde 3-phosphate dehydrogenase	Glyceraldehyde-3-phosphate dehydrogenase, cytosolic OS=Ranunculus acris GN=GAPC PE=2 SV=1	GO:0006006//glucose metabolic process;GO:0016620//oxidoreductase activity, acting on the aldehyde or oxo group of donors, NAD or NADP as acceptor;GO:0004823//leucine-tRNA ligase activity;GO:0005524//ATP binding;GO:0002161//aminoacyl-tRNA editing activity;GO:0006096//glycolytic process;GO:0004807//triose-phosphate isomerase activity;GO:0006429//leucyl-tRNA aminoacylation;GO:0051287//NAD binding;GO…
Unigene40592_All	361	ko00970//Aminoacyl-tRNA biosynthesis	Genetic Information Processing	Translation	-4.73484	0.000298398	0.000210881	K01881//prolyl-tRNA synthetase [EC:6.1.1.15]+ko00970//Aminoacyl-tRNA biosynthesis;K01881//prolyl-tRNA synthetase [EC:6.1.1.15]+ko00970//Aminoacyl-tRNA biosynthesis;K01881//prolyl-tRNA synthetase [EC:6.1.1.15]+ko00970//Aminoacyl-tRNA biosynthesis;K01881//prolyl-tRNA synthetase [EC:6.1.1.15]+ko00970//Aminoacyl-tRNA biosynthesis			prolyl-tRNA synthetase [Fistulifera solaris]	[J] KOG4163 Prolyl-tRNA synthetase	Proline--tRNA ligase, chloroplastic/mitochondrial OS=Arabidopsis thaliana GN=OVA6 PE=2 SV=1	GO:0006433//prolyl-tRNA aminoacylation;GO:0005524//ATP binding;GO:0005737//cytoplasm;GO:0004827//proline-tRNA ligase activity;GO:0017101//aminoacyl-tRNA synthetase multienzyme complex
Unigene61887_All	458	ko00970//Aminoacyl-tRNA biosynthesis	Genetic Information Processing	Translation	-4.73484	0.000298398	0.000210881	K01881//prolyl-tRNA synthetase [EC:6.1.1.15]+ko00970//Aminoacyl-tRNA biosynthesis;K01881//prolyl-tRNA synthetase [EC:6.1.1.15]+ko00970//Aminoacyl-tRNA biosynthesis;K01881//prolyl-tRNA synthetase [EC:6.1.1.15]+ko00970//Aminoacyl-tRNA biosynthesis;K01881//prolyl-tRNA synthetase [EC:6.1.1.15]+ko00970//Aminoacyl-tRNA biosynthesis;K01881//prolyl-tRNA synthetase [EC:6.1.1.15]+ko00970//Aminoacyl-tRNA bi…	Anticodon binding domain		prolyl-tRNA synthetase (chromatophore) [Paulinella chromatophora] >ACB43292.1 prolyl-tRNA synthetase (chromatophore) [Paulinella chromatophora]	[J] KOG4163 Prolyl-tRNA synthetase	Proline--tRNA ligase, cytoplasmic OS=Arabidopsis thaliana GN=At3g62120 PE=1 SV=1	GO:0006433//prolyl-tRNA aminoacylation;GO:0005524//ATP binding;GO:0002161//aminoacyl-tRNA editing activity;GO:0009536//plastid;GO:0005737//cytoplasm;GO:0004827//proline-tRNA ligase activity
CL1007.Contig2_All	1820	ko01100//Metabolic pathways;ko00970//Aminoacyl-tRNA biosynthesis	Metabolism;Genetic Information Processing	Translation;Global and overview maps	-4.93947	1.94527e-10	7.6241e-11	K02433//aspartyl-tRNA(Asn)/glutamyl-tRNA(Gln) amidotransferase subunit A [EC:6.3.5.6 6.3.5.7]+ko00970//Aminoacyl-tRNA biosynthesis+ko01100//Metabolic pathways;K02433//aspartyl-tRNA(Asn)/glutamyl-tRNA(Gln) amidotransferase subunit A [EC:6.3.5.6 6.3.5.7]+ko00970//Aminoacyl-tRNA biosynthesis+ko01100//Metabolic pathways;K02433//aspartyl-tRNA(Asn)/glutamyl-tRNA(Gln) amidotransferase subunit A [EC:6.3.…	Amidase	XM_005856112.1 Nannochloropsis gaditana CCMP526 aspartyl-tRNA(Asn)/glutamyl-tRNA (Gln) amidotransferase subunit A (GATA), partial mRNA	aspartyl-tRNA(Asn)/glutamyl-tRNA (Gln) amidotransferase subunit A [Nannochloropsis gaditana CCMP526] >EKU20195.1 aspartyl-tRNA(Asn)/glutamyl-tRNA (Gln) amidotransferase subunit A [Nannochloropsis gaditana CCMP526]	[J] KOG1211 Amidases	Glutamyl-tRNA(Gln) amidotransferase subunit A, chloroplastic/mitochondrial OS=Arabidopsis thaliana GN=GATA PE=2 SV=1	GO:0005524//ATP binding;GO:0032543//mitochondrial translation;GO:0050567//glutaminyl-tRNA synthase (glutamine-hydrolyzing) activity;GO:0070681//glutaminyl-tRNAGln biosynthesis via transamidation;GO:0016740//transferase activity;GO:0005739//mitochondrion;GO:0030956//glutamyl-tRNA(Gln) amidotransferase complex;GO:0004040//amidase activity
Unigene74229_All	584	ko00970//Aminoacyl-tRNA biosynthesis	Genetic Information Processing	Translation	-4.9413	3.16227e-08	1.44285e-08	K01887//arginyl-tRNA synthetase [EC:6.1.1.19]+ko00970//Aminoacyl-tRNA biosynthesis;K01887//arginyl-tRNA synthetase [EC:6.1.1.19]+ko00970//Aminoacyl-tRNA biosynthesis;K01887//arginyl-tRNA synthetase [EC:6.1.1.19]+ko00970//Aminoacyl-tRNA biosynthesis	Arginyl tRNA synthetase N terminal domain		putative arginine--tRNA ligase, cytoplasmic, partial [Dorcoceras hygrometricum]	[J] KOG4426 Arginyl-tRNA synthetase	Arginine--tRNA ligase, chloroplastic/mitochondrial OS=Arabidopsis thaliana GN=EMB1027 PE=1 SV=1	GO:0004814//arginine-tRNA ligase activity;GO:0005524//ATP binding;GO:0006420//arginyl-tRNA aminoacylation;GO:0005737//cytoplasm
Unigene68993_All	878	ko00970//Aminoacyl-tRNA biosynthesis	Genetic Information Processing	Translation	-5.16369	1.79121e-09	7.45766e-10	K01866//tyrosyl-tRNA synthetase [EC:6.1.1.1]+ko00970//Aminoacyl-tRNA biosynthesis;K01866//tyrosyl-tRNA synthetase [EC:6.1.1.1]+ko00970//Aminoacyl-tRNA biosynthesis	tRNA synthetases class I (W and Y)		tyrosyl-tRNA synthetase [Guillardia theta CCMP2712] >EKX52776.1 tyrosyl-tRNA synthetase [Guillardia theta CCMP2712]	[J] KOG2623 Tyrosyl-tRNA synthetase	Tyrosine--tRNA ligase, chloroplastic/mitochondrial OS=Arabidopsis thaliana GN=EMB2768 PE=2 SV=1	GO:0003723//RNA binding;GO:0005524//ATP binding;GO:0004831//tyrosine-tRNA ligase activity;GO:0006437//tyrosyl-tRNA aminoacylation;GO:0005737//cytoplasm
Unigene64810_All	492	ko00970//Aminoacyl-tRNA biosynthesis	Genetic Information Processing	Translation	-5.20433	1.67523e-05	9.94983e-06	K01873//valyl-tRNA synthetase [EC:6.1.1.9]+ko00970//Aminoacyl-tRNA biosynthesis;K01873//valyl-tRNA synthetase [EC:6.1.1.9]+ko00970//Aminoacyl-tRNA biosynthesis	tRNA synthetases class I (I, L, M and V)		hypothetical protein F511_09453 [Dorcoceras hygrometricum]	[J] KOG0432 Valyl-tRNA synthetase	Valine--tRNA ligase, mitochondrial 1 OS=Arabidopsis thaliana GN=TWN2 PE=1 SV=2	GO:0004832//valine-tRNA ligase activity;GO:0005524//ATP binding;GO:0002161//aminoacyl-tRNA editing activity;GO:0006438//valyl-tRNA aminoacylation;GO:0005737//cytoplasm;GO:0009570//chloroplast stroma
Unigene70010_All	647	ko00970//Aminoacyl-tRNA biosynthesis	Genetic Information Processing	Translation	-5.28233	9.50308e-06	5.48026e-06	K01869//leucyl-tRNA synthetase [EC:6.1.1.4]+ko00970//Aminoacyl-tRNA biosynthesis;K01869//leucyl-tRNA synthetase [EC:6.1.1.4]+ko00970//Aminoacyl-tRNA biosynthesis;K01869//leucyl-tRNA synthetase [EC:6.1.1.4]+ko00970//Aminoacyl-tRNA biosynthesis;K01869//leucyl-tRNA synthetase [EC:6.1.1.4]+ko00970//Aminoacyl-tRNA biosynthesis;K01869//leucyl-tRNA synthetase [EC:6.1.1.4]+ko00970//Aminoacyl-tRNA biosynt…	tRNA synthetases class I (I, L, M and V)		leucine--tRNA ligase [Ostreococcus tauri]	[J] KOG0435 Leucyl-tRNA synthetase	Leucine--tRNA ligase, chloroplastic/mitochondrial OS=Arabidopsis thaliana GN=EMB2369 PE=2 SV=1	GO:0004823//leucine-tRNA ligase activity;GO:0005524//ATP binding;GO:0002161//aminoacyl-tRNA editing activity;GO:0032543//mitochondrial translation;GO:0006429//leucyl-tRNA aminoacylation;GO:0005739//mitochondrion
CL49.Contig1_All	989	ko00970//Aminoacyl-tRNA biosynthesis;ko00450//Selenocompound metabolism	Genetic Information Processing;Metabolism	Metabolism of other amino acids;Translation	-5.31981	1.84439e-10	7.21574e-11	K01874//methionyl-tRNA synthetase [EC:6.1.1.10]+ko00970//Aminoacyl-tRNA biosynthesis+ko00450//Selenocompound metabolism	tRNA synthetases class I (M)		methionine--tRNA ligase [Ostreococcus tauri]	[J] KOG1247 Methionyl-tRNA synthetase	Probable methionine--tRNA ligase OS=Oryza sativa subsp. japonica GN=Os06g0508700 PE=2 SV=2	GO:0005524//ATP binding;GO:0006418//tRNA aminoacylation for protein translation;GO:0005829//cytosol;GO:0006431//methionyl-tRNA aminoacylation;GO:0004825//methionine-tRNA ligase activity;GO:0000049//tRNA binding;GO:0005737//cytoplasm
Unigene38698_All	1059	ko00970//Aminoacyl-tRNA biosynthesis	Genetic Information Processing	Translation	-5.42672	3.41587e-11	1.27578e-11	K01875//seryl-tRNA synthetase [EC:6.1.1.11]+ko00970//Aminoacyl-tRNA biosynthesis;K01875//seryl-tRNA synthetase [EC:6.1.1.11]+ko00970//Aminoacyl-tRNA biosynthesis;K01875//seryl-tRNA synthetase [EC:6.1.1.11]+ko00970//Aminoacyl-tRNA biosynthesis;K01875//seryl-tRNA synthetase [EC:6.1.1.11]+ko00970//Aminoacyl-tRNA biosynthesis;K01875//seryl-tRNA synthetase [EC:6.1.1.11]+ko00970//Aminoacyl-tRNA biosynt…	Seryl-tRNA synthetase N-terminal domain		seryl-tRNA synthetase [Guillardia theta CCMP2712] >EKX48949.1 seryl-tRNA synthetase [Guillardia theta CCMP2712]	[J] KOG2509 Seryl-tRNA synthetase	Serine--tRNA ligase, cytoplasmic OS=Arabidopsis thaliana GN=At5g27470 PE=2 SV=1	GO:0004828//serine-tRNA ligase activity;GO:0005524//ATP binding;GO:0009536//plastid;GO:0006434//seryl-tRNA aminoacylation;GO:0005737//cytoplasm
Unigene57769_All	935	ko00970//Aminoacyl-tRNA biosynthesis	Genetic Information Processing	Translation	-5.78929	1.12117e-07	5.35211e-08	K01868//threonyl-tRNA synthetase [EC:6.1.1.3]+ko00970//Aminoacyl-tRNA biosynthesis;K01868//threonyl-tRNA synthetase [EC:6.1.1.3]+ko00970//Aminoacyl-tRNA biosynthesis;K01868//threonyl-tRNA synthetase [EC:6.1.1.3]+ko00970//Aminoacyl-tRNA biosynthesis;K01868//threonyl-tRNA synthetase [EC:6.1.1.3]+ko00970//Aminoacyl-tRNA biosynthesis;K01868//threonyl-tRNA synthetase [EC:6.1.1.3]+ko00970//Aminoacyl-tR…	TGS domain	XM_005856109.1 Nannochloropsis gaditana CCMP526 threonyl-tRNA synthetase (TARS), partial mRNA	threonyl-tRNA synthetase [Nannochloropsis gaditana CCMP526] >EKU20192.1 threonyl-tRNA synthetase [Nannochloropsis gaditana CCMP526]	[J] KOG1637 Threonyl-tRNA synthetase	Threonine--tRNA ligase, chloroplastic/mitochondrial 2 OS=Arabidopsis thaliana GN=EMB2761 PE=2 SV=1	GO:0004829//threonine-tRNA ligase activity;GO:0005524//ATP binding;GO:0005739//mitochondrion;GO:0006435//threonyl-tRNA aminoacylation;GO:0005737//cytoplasm;GO:0009570//chloroplast stroma
Unigene75013_All	909	ko00970//Aminoacyl-tRNA biosynthesis	Genetic Information Processing	Translation	-5.84176	6.50864e-08	3.04863e-08	K01889//phenylalanyl-tRNA synthetase alpha chain [EC:6.1.1.20]+ko00970//Aminoacyl-tRNA biosynthesis;K01889//phenylalanyl-tRNA synthetase alpha chain [EC:6.1.1.20]+ko00970//Aminoacyl-tRNA biosynthesis;K01889//phenylalanyl-tRNA synthetase alpha chain [EC:6.1.1.20]+ko00970//Aminoacyl-tRNA biosynthesis	tRNA synthetases class II core domain (F)		phenylalanyl-tRNA synthetase alpha subunit (plastid) [Paulinella micropora]	[J] KOG2783 Phenylalanyl-tRNA synthetase	Phenylalanine--tRNA ligase, chloroplastic/mitochondrial OS=Arabidopsis thaliana GN=At3g58140 PE=1 SV=1	GO:0006432//phenylalanyl-tRNA aminoacylation;GO:0004826//phenylalanine-tRNA ligase activity;GO:0005524//ATP binding;GO:0000049//tRNA binding;GO:0009536//plastid;GO:0005737//cytoplasm
Unigene60609_All	784	ko00970//Aminoacyl-tRNA biosynthesis	Genetic Information Processing	Translation	-6.0344	7.59615e-09	3.30899e-09	K01887//arginyl-tRNA synthetase [EC:6.1.1.19]+ko00970//Aminoacyl-tRNA biosynthesis;K01887//arginyl-tRNA synthetase [EC:6.1.1.19]+ko00970//Aminoacyl-tRNA biosynthesis;K01887//arginyl-tRNA synthetase [EC:6.1.1.19]+ko00970//Aminoacyl-tRNA biosynthesis;K01887//arginyl-tRNA synthetase [EC:6.1.1.19]+ko00970//Aminoacyl-tRNA biosynthesis;K01887//arginyl-tRNA synthetase [EC:6.1.1.19]+ko00970//Aminoacyl-tR…	DALR anticodon binding domain		putative arginine--tRNA ligase, cytoplasmic, partial [Dorcoceras hygrometricum]	[J] KOG1195 Arginyl-tRNA synthetase		GO:0004814//arginine-tRNA ligase activity;GO:0005524//ATP binding;GO:0006420//arginyl-tRNA aminoacylation;GO:0005737//cytoplasm

## Sheet: Proteasome
Supplementary Table 7:	Differentially expressed genes involved in proteosome metabolism
Gene ID	Length	Pathway Name	Level 1	Level 2	log2(He_1000/He_400)	Qvalue(He_400-vs-He_1000)	Pvalue(He_400-vs-He_1000)	Kegg Orthology	Pfam	Nt	Nr	Kog	Swissprot	GO
CL878.Contig6_All	927	ko03050//Proteasome	Genetic Information Processing	Folding, sorting and degradation	1.92686	0.000373291	0.000266932	K02735//20S proteasome subunit beta 3 [EC:3.4.25.1]+ko03050//Proteasome;K02735//20S proteasome subunit beta 3 [EC:3.4.25.1]+ko03050//Proteasome;K02735//20S proteasome subunit beta 3 [EC:3.4.25.1]+ko03050//Proteasome	Proteasome subunit		proteasome beta subunit [Ectocarpus siliculosus]	[O] KOG0180 20S proteasome, regulatory subunit beta type PSMB3/PUP3	Proteasome subunit beta type-3 OS=Oryza sativa subsp. japonica GN=PBC1 PE=2 SV=1	GO:0005634//nucleus;GO:0043161//proteasome-mediated ubiquitin-dependent protein catabolic process;GO:0004298//threonine-type endopeptidase activity;GO:0019774//proteasome core complex, beta-subunit complex;GO:0005737//cytoplasm
CL11232.Contig8_All	1632	ko03050//Proteasome	Genetic Information Processing	Folding, sorting and degradation	1.18656	1.06896e-18	2.83941e-19	K02735//20S proteasome subunit beta 3 [EC:3.4.25.1]+ko03050//Proteasome;K02735//20S proteasome subunit beta 3 [EC:3.4.25.1]+ko03050//Proteasome;K02735//20S proteasome subunit beta 3 [EC:3.4.25.1]+ko03050//Proteasome;K02735//20S proteasome subunit beta 3 [EC:3.4.25.1]+ko03050//Proteasome;K02735//20S proteasome subunit beta 3 [EC:3.4.25.1]+ko03050//Proteasome	Proteasome subunit		conserved unknown protein [Ectocarpus siliculosus]	[O] KOG0180 20S proteasome, regulatory subunit beta type PSMB3/PUP3	Proteasome subunit beta type-3 OS=Picea mariana GN=PBC1 PE=2 SV=1	GO:0043161//proteasome-mediated ubiquitin-dependent protein catabolic process;GO:0004298//threonine-type endopeptidase activity;GO:0019774//proteasome core complex, beta-subunit complex
CL9126.Contig1_All	3322	ko03050//Proteasome	Genetic Information Processing	Folding, sorting and degradation	1.12396	2.95706e-59	3.53927e-60	K03028//26S proteasome regulatory subunit N1+ko03050//Proteasome	RWP-RK domain		Putative NIN-like transcription factor [Ectocarpus siliculosus]	[R] LSE0422 A Homolog of regulator controlling development of symbiotic root nodules, contains Phox and Bem1p domain, and RWP-RK domain	Protein NLP6 OS=Arabidopsis thaliana GN=NLP6 PE=2 SV=2	GO:0003677//DNA binding;GO:0005634//nucleus;GO:0006355//regulation of transcription, DNA-templated;GO:0006351//transcription, DNA-templated
Unigene19218_All	609	ko03050//Proteasome	Genetic Information Processing	Folding, sorting and degradation	1.02535	3.9405e-17	1.11382e-17	K02738//20S proteasome subunit beta 1 [EC:3.4.25.1]+ko03050//Proteasome;K02738//20S proteasome subunit beta 1 [EC:3.4.25.1]+ko03050//Proteasome;K02738//20S proteasome subunit beta 1 [EC:3.4.25.1]+ko03050//Proteasome;K02738//20S proteasome subunit beta 1 [EC:3.4.25.1]+ko03050//Proteasome	Proteasome subunit		proteasome subunit beta type 6 [Ectocarpus siliculosus]	[O] KOG0174 20S proteasome, regulatory subunit beta type PSMB6/PSMB9/PRE3	Proteasome subunit beta type-6 OS=Nicotiana tabacum PE=2 SV=1	GO:0005634//nucleus;GO:0051603//proteolysis involved in cellular protein catabolic process;GO:0004298//threonine-type endopeptidase activity;GO:0005737//cytoplasm;GO:0005839//proteasome core complex
CL11232.Contig7_All	2461	ko03050//Proteasome	Genetic Information Processing	Folding, sorting and degradation	-1.417	2.70635e-51	3.5696e-52	K02735//20S proteasome subunit beta 3 [EC:3.4.25.1]+ko03050//Proteasome;K02735//20S proteasome subunit beta 3 [EC:3.4.25.1]+ko03050//Proteasome;K02735//20S proteasome subunit beta 3 [EC:3.4.25.1]+ko03050//Proteasome;K02735//20S proteasome subunit beta 3 [EC:3.4.25.1]+ko03050//Proteasome;K02735//20S proteasome subunit beta 3 [EC:3.4.25.1]+ko03050//Proteasome	Proteasome subunit		conserved unknown protein [Ectocarpus siliculosus]	[O] KOG0180 20S proteasome, regulatory subunit beta type PSMB3/PUP3	Proteasome subunit beta type-3 OS=Picea mariana GN=PBC1 PE=2 SV=1	GO:0043161//proteasome-mediated ubiquitin-dependent protein catabolic process;GO:0004298//threonine-type endopeptidase activity;GO:0019774//proteasome core complex, beta-subunit complex
Unigene4424_All	2344	ko03440//Homologous recombination;ko03050//Proteasome	Genetic Information Processing	Replication and repair;Folding, sorting and degradation	-1.56403	4.16572e-28	8.42267e-29	K10881//26 proteasome complex subunit DSS1+ko03050//Proteasome+ko03440//Homologous recombination;K10881//26 proteasome complex subunit DSS1+ko03050//Proteasome+ko03440//Homologous recombination;K10881//26 proteasome complex subunit DSS1+ko03050//Proteasome+ko03440//Homologous recombination;K10881//26 proteasome complex subunit DSS1+ko03050//Proteasome+ko03440//Homologous recombination	Ankyrin repeats (3 copies)		hypothetical protein PPTG_15090 [Phytophthora parasitica INRA-310] >ETN04425.1 hypothetical protein PPTG_15090 [Phytophthora parasitica INRA-310]
CL11374.Contig2_All	1139	ko03050//Proteasome	Genetic Information Processing	Folding, sorting and degradation	-2.85883	7.71989e-15	2.39621e-15	K03061//26S proteasome regulatory subunit T1+ko03050//Proteasome;K03061//26S proteasome regulatory subunit T1+ko03050//Proteasome;K03061//26S proteasome regulatory subunit T1+ko03050//Proteasome;K03061//26S proteasome regulatory subunit T1+ko03050//Proteasome;K03061//26S proteasome regulatory subunit T1+ko03050//Proteasome		XM_009042235.1 Aureococcus anophagefferens 26S proteasome ATPase subunit partial mRNA	26S protease regulatory subunit 7 [Achlya hypogyna]	[O] KOG0729 26S proteasome regulatory complex, ATPase RPT1	26S proteasome regulatory subunit 7 OS=Spinacia oleracea GN=RPT1 PE=2 SV=1	GO:0008233//peptidase activity;GO:0005524//ATP binding;GO:0030163//protein catabolic process;GO:0005737//cytoplasm
CL11250.Contig3_All	3957	ko03050//Proteasome	Genetic Information Processing	Folding, sorting and degradation	-2.94096	0	0	K02737//20S proteasome subunit beta 5 [EC:3.4.25.1]+ko03050//Proteasome;K02737//20S proteasome subunit beta 5 [EC:3.4.25.1]+ko03050//Proteasome;K02737//20S proteasome subunit beta 5 [EC:3.4.25.1]+ko03050//Proteasome	Proteasome subunit		hypothetical protein THAOC_32963 [Thalassiosira oceanica]	[O] KOG0175 20S proteasome, regulatory subunit beta type PSMB5/PSMB8/PRE2	Proteasome subunit beta type-5-A OS=Arabidopsis thaliana GN=PBE1 PE=1 SV=1	GO:0051603//proteolysis involved in cellular protein catabolic process;GO:0004298//threonine-type endopeptidase activity;GO:0005839//proteasome core complex
CL11091.Contig1_All	2211	ko03050//Proteasome	Genetic Information Processing	Folding, sorting and degradation	-4.6909	0.000376193	0.00026909	K02732//20S proteasome subunit beta 6 [EC:3.4.25.1]+ko03050//Proteasome;K02732//20S proteasome subunit beta 6 [EC:3.4.25.1]+ko03050//Proteasome;K02732//20S proteasome subunit beta 6 [EC:3.4.25.1]+ko03050//Proteasome;K02732//20S proteasome subunit beta 6 [EC:3.4.25.1]+ko03050//Proteasome;K02732//20S proteasome subunit beta 6 [EC:3.4.25.1]+ko03050//Proteasome	Proteasome subunit		proteasome subunit beta [Thraustotheca clavata]	[O] KOG0179 20S proteasome, regulatory subunit beta type PSMB1/PRE7	Proteasome subunit beta type-1 OS=Arabidopsis thaliana GN=PBF1 PE=1 SV=2	GO:0051603//proteolysis involved in cellular protein catabolic process;GO:0004298//threonine-type endopeptidase activity;GO:0005839//proteasome core complex
CL5691.Contig2_All	298	ko03050//Proteasome	Genetic Information Processing	Folding, sorting and degradation	-4.84176	0.000167012	0.00011332	K03061//26S proteasome regulatory subunit T1+ko03050//Proteasome;K03061//26S proteasome regulatory subunit T1+ko03050//Proteasome;K03061//26S proteasome regulatory subunit T1+ko03050//Proteasome;K03061//26S proteasome regulatory subunit T1+ko03050//Proteasome;K03061//26S proteasome regulatory subunit T1+ko03050//Proteasome	Protein of unknown function (DUF2526)	XM_009042235.1 Aureococcus anophagefferens 26S proteasome ATPase subunit partial mRNA	26S proteasome regulatory ATPase subunit [Ectocarpus siliculosus]	[O] KOG0729 26S proteasome regulatory complex, ATPase RPT1	26S proteasome regulatory subunit 7A OS=Oryza sativa subsp. japonica GN=RPT1A PE=2 SV=1	GO:0016787//hydrolase activity;GO:0005524//ATP binding;GO:0000502//proteasome complex;GO:0030163//protein catabolic process;GO:0005737//cytoplasm

## Sheet: Protein proc. in endopl. reticu
Supplementary Table 7:	Differentially expressed genes involved in protein processing in endoplasmic reticulam metabolism
Gene ID	Length	Pathway Name	Level 1	Level 2	log2(He_1000/He_400)	Qvalue(He_400-vs-He_1000)	Pvalue(He_400-vs-He_1000)	Kegg Orthology	Pfam	Nt	Nr	Kog	Swissprot	GO
Unigene14983_All	3187	ko04141//Protein processing in endoplasmic reticulum	Genetic Information Processing	Folding, sorting and degradation	11.1541	2.07446e-289	7.34731e-291	K14018//phospholipase A-2-activating protein+ko04141//Protein processing in endoplasmic reticulum;K14018//phospholipase A-2-activating protein+ko04141//Protein processing in endoplasmic reticulum;K14018//phospholipase A-2-activating protein+ko04141//Protein processing in endoplasmic reticulum;K19329//WW domain-containing oxidoreductase	short chain dehydrogenase		short-chain alcohol dehydrogenase-like protein [Ectocarpus siliculosus]	[I] KOG0301 Phospholipase A2-activating protein (contains WD40 repeats)	Salutaridine reductase OS=Papaver bracteatum GN=SALR PE=1 SV=1
Unigene55197_All	782	ko03060//Protein export;ko04141//Protein processing in endoplasmic reticulum	Genetic Information Processing	Folding, sorting and degradation	2.9656	1.89322e-06	1.01232e-06	K09490//heat shock 70kDa protein 5+ko04141//Protein processing in endoplasmic reticulum+ko03060//Protein export;K09490//heat shock 70kDa protein 5+ko04141//Protein processing in endoplasmic reticulum+ko03060//Protein export;K09490//heat shock 70kDa protein 5+ko04141//Protein processing in endoplasmic reticulum+ko03060//Protein export;K09490//heat shock 70kDa protein 5+ko04141//Protein processing …	Hsp70 protein	XM_002288531.1 Thalassiosira pseudonana CCMP1335 heat shock protein/chaperone (hsp70_4), mRNA	heat shock protein/chaperone [Thalassiosira pseudonana CCMP1335] >EED94003.1 heat shock protein/chaperone [Thalassiosira pseudonana CCMP1335]	[O] KOG0100 Molecular chaperones GRP78/BiP/KAR2, HSP70 superfamily	Luminal-binding protein OS=Spinacia oleracea GN=HSC70 PE=2 SV=1	GO:0005524//ATP binding
CL2101.Contig2_All	2480	ko04145//Phagosome;ko04141//Protein processing in endoplasmic reticulum;ko01110//Biosynthesis of secondary metabolites;ko03060//Protein export;ko03015//mRNA surveillance pathway;ko01100//Metabolic pathways;ko00940//Phenylpropanoid biosynthesis;ko03013//RNA transport	Genetic Information Processing;Cellular Processes;Metabolism	Global and overview maps;Folding, sorting and degradation;Translation;Transport and catabolism;Biosynthesis of other secondary metabolites	2.67989	0	0	K10956//protein transport protein SEC61 subunit alpha+ko04145//Phagosome+ko04141//Protein processing in endoplasmic reticulum+ko03060//Protein export;K00430//peroxidase [EC:1.11.1.7]+ko01100//Metabolic pathways+ko01110//Biosynthesis of secondary metabolites+ko00940//Phenylpropanoid biosynthesis;K13171//serine/arginine repetitive matrix protein 1+ko03015//mRNA surveillance pathway+ko03013//RNA tra…			hypothetical protein BU14_0256s0024 [Porphyra umbilicalis]	[M] LSE0601 A Pollen extensin-like protein (Pex)	Proline-rich receptor-like protein kinase PERK2 OS=Arabidopsis thaliana GN=PERK2 PE=2 SV=3	GO:0004252//serine-type endopeptidase activity;GO:0016539//intein-mediated protein splicing;GO:0008233//peptidase activity;GO:0016021//integral component of membrane
CL3658.Contig2_All	1653	ko04141//Protein processing in endoplasmic reticulum	Genetic Information Processing	Folding, sorting and degradation	2.62169	5.79457e-20	1.4724e-20	K14005//protein transport protein SEC31+ko04141//Protein processing in endoplasmic reticulum;K02184//formin 2	HIRA B motif	CP023132.1 Lupinus angustiflorus cultivar Tanjil chromosome LG-20	hypothetical protein BU14_0191s0013 [Porphyra umbilicalis]	[R] KOG1721 FOG: Zn-finger	CASP-like protein 4A1 OS=Zea mays PE=2 SV=2
Unigene10946_All	2841	ko04141//Protein processing in endoplasmic reticulum	Genetic Information Processing	Folding, sorting and degradation	2.50235	1.10564e-113	8.1877e-115	K09584//protein disulfide-isomerase A6 [EC:5.3.4.1]+ko04141//Protein processing in endoplasmic reticulum;K09584//protein disulfide-isomerase A6 [EC:5.3.4.1]+ko04141//Protein processing in endoplasmic reticulum;K09584//protein disulfide-isomerase A6 [EC:5.3.4.1]+ko04141//Protein processing in endoplasmic reticulum;K09584//protein disulfide-isomerase A6 [EC:5.3.4.1]+ko04141//Protein processing in e…	Thioredoxin	XM_009353051.1 PREDICTED: Pyrus x bretschneideri protein disulfide-isomerase erp38-like (LOC103942850), mRNA	hypothetical protein SDRG_05719 [Saprolegnia diclina VS20] >EQC36890.1 hypothetical protein SDRG_05719 [Saprolegnia diclina VS20]	[O] KOG0190 Protein disulfide isomerase (prolyl 4-hydroxylase beta subunit)	Probable protein disulfide-isomerase A6 OS=Medicago sativa PE=2 SV=1	GO:0005783//endoplasmic reticulum;GO:0016853//isomerase activity;GO:0045454//cell redox homeostasis
Unigene40676_All	1798	ko01100//Metabolic pathways;ko00040//Pentose and glucuronate interconversions;ko03013//RNA transport;ko03015//mRNA surveillance pathway;ko03040//Spliceosome;ko04141//Protein processing in endoplasmic reticulum	Genetic Information Processing;Metabolism	Carbohydrate metabolism;Transcription;Global and overview maps;Folding, sorting and degradation;Translation	2.48141	4.6448e-38	7.59115e-39	K12875//apoptotic chromatin condensation inducer in the nucleus+ko03040//Spliceosome+ko03015//mRNA surveillance pathway+ko03013//RNA transport;K01051//pectinesterase [EC:3.1.1.11]+ko00040//Pentose and glucuronate interconversions+ko01100//Metabolic pathways;K03327//multidrug resistance protein, MATE family;K11863//Ataxin-3 [EC:3.4.22.-]+ko04141//Protein processing in endoplasmic reticulum	PT repeat		hypothetical protein SDRG_04536 [Saprolegnia diclina VS20] >EQC38106.1 hypothetical protein SDRG_04536 [Saprolegnia diclina VS20]	[R] KOG4307 RNA binding protein RBM12/SWAN	Non-classical arabinogalactan protein 31 OS=Arabidopsis thaliana GN=AGP31 PE=1 SV=1	GO:0046872//metal ion binding;GO:0016491//oxidoreductase activity
CL4879.Contig1_All	999	ko04145//Phagosome;ko03060//Protein export;ko04141//Protein processing in endoplasmic reticulum	Genetic Information Processing;Cellular Processes	Folding, sorting and degradation;Transport and catabolism	2.32693	8.5041e-39	1.3683e-39	K10956//protein transport protein SEC61 subunit alpha+ko04145//Phagosome+ko04141//Protein processing in endoplasmic reticulum+ko03060//Protein export;K11275//histone H1/5;K17987//next to BRCA1 gene 1 protein			hypothetical protein GUITHDRAFT_119564 [Guillardia theta CCMP2712] >EKX34274.1 hypothetical protein GUITHDRAFT_119564 [Guillardia theta CCMP2712]	[W] KOG3544 Collagens (type IV and type XIII), and related proteins	Formin-like protein 5 OS=Oryza sativa subsp. japonica GN=FH5 PE=2 SV=2	GO:0016021//integral component of membrane
CL8630.Contig14_All	1839	ko04141//Protein processing in endoplasmic reticulum	Genetic Information Processing	Folding, sorting and degradation	1.99412	1.30126e-48	1.78333e-49	K14016//ubiquitin fusion degradation protein 1+ko04141//Protein processing in endoplasmic reticulum;K14016//ubiquitin fusion degradation protein 1+ko04141//Protein processing in endoplasmic reticulum	Ubiquitin fusion degradation protein UFD1		conserved unknown protein [Ectocarpus siliculosus]	[O] KOG1816 Ubiquitin fusion-degradation protein		GO:0006511//ubiquitin-dependent protein catabolic process
Unigene31763_All	1194	ko04141//Protein processing in endoplasmic reticulum;ko03060//Protein export	Genetic Information Processing	Folding, sorting and degradation	1.95049	1.02347e-10	3.94255e-11	K09490//heat shock 70kDa protein 5+ko04141//Protein processing in endoplasmic reticulum+ko03060//Protein export;K09490//heat shock 70kDa protein 5+ko04141//Protein processing in endoplasmic reticulum+ko03060//Protein export;K09490//heat shock 70kDa protein 5+ko04141//Protein processing in endoplasmic reticulum+ko03060//Protein export;K09490//heat shock 70kDa protein 5+ko04141//Protein processing …	Hsp70 protein	XM_002288531.1 Thalassiosira pseudonana CCMP1335 heat shock protein/chaperone (hsp70_4), mRNA	heat shock protein/chaperone [Thalassiosira pseudonana CCMP1335] >EED94003.1 heat shock protein/chaperone [Thalassiosira pseudonana CCMP1335]	[O] KOG0100 Molecular chaperones GRP78/BiP/KAR2, HSP70 superfamily	Luminal-binding protein 3 OS=Zea mays GN=BIPE3 PE=2 SV=1	GO:0005524//ATP binding
CL3817.Contig2_All	1067	ko04141//Protein processing in endoplasmic reticulum	Genetic Information Processing	Folding, sorting and degradation	1.94497	4.17692e-22	9.88185e-23	K13989//Derlin-2/3+ko04141//Protein processing in endoplasmic reticulum;K13989//Derlin-2/3+ko04141//Protein processing in endoplasmic reticulum;K13989//Derlin-2/3+ko04141//Protein processing in endoplasmic reticulum;K13989//Derlin-2/3+ko04141//Protein processing in endoplasmic reticulum;K13989//Derlin-2/3+ko04141//Protein processing in endoplasmic reticulum	Der1-like family		hypothetical protein PHMEG_00032823 [Phytophthora megakarya]	[S] KOG0858 Predicted membrane protein	Derlin-1 OS=Arabidopsis thaliana GN=DER1 PE=2 SV=1	GO:0016021//integral component of membrane;GO:0005789//endoplasmic reticulum membrane
Unigene165_All	3349	ko03013//RNA transport;ko03015//mRNA surveillance pathway;ko04145//Phagosome;ko03060//Protein export;ko04141//Protein processing in endoplasmic reticulum	Cellular Processes;Genetic Information Processing	Transport and catabolism;Translation;Folding, sorting and degradation	1.64104	1.63894e-104	1.29908e-105	K10956//protein transport protein SEC61 subunit alpha+ko04145//Phagosome+ko04141//Protein processing in endoplasmic reticulum+ko03060//Protein export;K13171//serine/arginine repetitive matrix protein 1+ko03015//mRNA surveillance pathway+ko03013//RNA transport;K22020//mucin-19;K17987//next to BRCA1 gene 1 protein;K13171//serine/arginine repetitive matrix protein 1+ko03015//mRNA surveillance pathwa…			hypothetical protein AURANDRAFT_70714, partial [Aureococcus anophagefferens] >EGB12011.1 hypothetical protein AURANDRAFT_70714, partial [Aureococcus anophagefferens]	[A] KOG1869 Splicing coactivator SRm160/300, subunit SRm300
Unigene15170_All	3225	ko04141//Protein processing in endoplasmic reticulum;ko03420//Nucleotide excision repair	Genetic Information Processing	Replication and repair;Folding, sorting and degradation	1.63655	3.02555e-08	1.37797e-08	K10839//UV excision repair protein RAD23+ko04141//Protein processing in endoplasmic reticulum+ko03420//Nucleotide excision repair	DEC-1 protein, N-terminal region	XM_022002589.1 PREDICTED: Spinacia oleracea phosphatidylinositol 3,4,5-trisphosphate 3-phosphatase and protein-tyrosine-phosphatase PTEN2A (LOC110797480), transcript variant X3, mRNA		[R] LSE0016 C Predicted secreted small molecules methylase
Unigene16846_All	1081	ko04141//Protein processing in endoplasmic reticulum	Genetic Information Processing	Folding, sorting and degradation	1.55056	7.99981e-06	4.57104e-06	K09584//protein disulfide-isomerase A6 [EC:5.3.4.1]+ko04141//Protein processing in endoplasmic reticulum;K09584//protein disulfide-isomerase A6 [EC:5.3.4.1]+ko04141//Protein processing in endoplasmic reticulum;K09584//protein disulfide-isomerase A6 [EC:5.3.4.1]+ko04141//Protein processing in endoplasmic reticulum	Thioredoxin		predicted protein [Thalassiosira pseudonana CCMP1335] >EED89008.1 predicted protein [Thalassiosira pseudonana CCMP1335]	[O] KOG0191 Thioredoxin/protein disulfide isomerase	Protein disulfide-isomerase-like protein EhSep2 OS=Emiliania huxleyi GN=SEP2 PE=1 SV=2	GO:0006457//protein folding;GO:0005783//endoplasmic reticulum;GO:0005623//cell;GO:0034976//response to endoplasmic reticulum stress;GO:0003756//protein disulfide isomerase activity;GO:0045454//cell redox homeostasis
Unigene49853_All	1686	ko04141//Protein processing in endoplasmic reticulum	Genetic Information Processing	Folding, sorting and degradation	1.42917	7.27207e-33	1.32481e-33	K14016//ubiquitin fusion degradation protein 1+ko04141//Protein processing in endoplasmic reticulum;K14016//ubiquitin fusion degradation protein 1+ko04141//Protein processing in endoplasmic reticulum	Ubiquitin fusion degradation protein UFD1		conserved unknown protein [Ectocarpus siliculosus]	[O] KOG1816 Ubiquitin fusion-degradation protein		GO:0006511//ubiquitin-dependent protein catabolic process
Unigene15248_All	1725	ko04141//Protein processing in endoplasmic reticulum	Genetic Information Processing	Folding, sorting and degradation	1.41913	6.75073e-17	1.92934e-17	K09517//DnaJ homolog subfamily B member 11+ko04141//Protein processing in endoplasmic reticulum;K09517//DnaJ homolog subfamily B member 11+ko04141//Protein processing in endoplasmic reticulum;K09517//DnaJ homolog subfamily B member 11+ko04141//Protein processing in endoplasmic reticulum;K09517//DnaJ homolog subfamily B member 11+ko04141//Protein processing in endoplasmic reticulum;K09517//DnaJ ho…	DnaJ domain		chaperone protein [Nannochloropsis gaditana]	[O] KOG0712 Molecular chaperone (DnaJ superfamily)	Chaperone protein dnaJ 15 OS=Arabidopsis thaliana GN=ATJ15 PE=1 SV=1
Unigene9662_All	1883	ko04145//Phagosome;ko04141//Protein processing in endoplasmic reticulum;ko03060//Protein export	Cellular Processes;Genetic Information Processing	Transport and catabolism;Folding, sorting and degradation	1.39669	0	0	K22020//mucin-19;K16628//collagen, type VII, alpha;K10956//protein transport protein SEC61 subunit alpha+ko04145//Phagosome+ko04141//Protein processing in endoplasmic reticulum+ko03060//Protein export	Nucleotide-sugar transporter		conserved unknown protein [Ectocarpus siliculosus]	[WV] KOG1216 von Willebrand factor and related coagulation proteins	Protein IQ-DOMAIN 14 OS=Arabidopsis thaliana GN=IQD14 PE=1 SV=1	GO:0055085//transmembrane transport;GO:0016021//integral component of membrane
Unigene717_All	789	ko04120//Ubiquitin mediated proteolysis;ko04141//Protein processing in endoplasmic reticulum	Genetic Information Processing	Folding, sorting and degradation	1.28399	1.04696e-05	6.07072e-06	K03094//S-phase kinase-associated protein 1+ko04141//Protein processing in endoplasmic reticulum+ko04120//Ubiquitin mediated proteolysis;K03094//S-phase kinase-associated protein 1+ko04141//Protein processing in endoplasmic reticulum+ko04120//Ubiquitin mediated proteolysis;K03094//S-phase kinase-associated protein 1+ko04141//Protein processing in endoplasmic reticulum+ko04120//Ubiquitin mediated …		CP023114.1 Lupinus angustiflorus cultivar Tanjil chromosome LG-02	conserved unknown protein [Ectocarpus siliculosus]	[O] KOG1724 SCF ubiquitin ligase, Skp1 component	SKP1-like protein 11 OS=Arabidopsis thaliana GN=ASK11 PE=1 SV=1	GO:0006511//ubiquitin-dependent protein catabolic process
Unigene26324_All	1439	ko03060//Protein export;ko04141//Protein processing in endoplasmic reticulum	Genetic Information Processing	Folding, sorting and degradation	1.24986	0	0	K12275//translocation protein SEC62+ko04141//Protein processing in endoplasmic reticulum+ko03060//Protein export;K12275//translocation protein SEC62+ko04141//Protein processing in endoplasmic reticulum+ko03060//Protein export;K12275//translocation protein SEC62+ko04141//Protein processing in endoplasmic reticulum+ko03060//Protein export	Translocation protein Sec62		conserved unknown protein [Ectocarpus siliculosus]	[U] KOG2927 Membrane component of ER protein translocation complex		GO:0008565//protein transporter activity;GO:0016021//integral component of membrane
Unigene6758_All	2278	ko03060//Protein export;ko03015//mRNA surveillance pathway;ko04141//Protein processing in endoplasmic reticulum;ko04145//Phagosome;ko03013//RNA transport	Genetic Information Processing;Cellular Processes	Transport and catabolism;Translation;Folding, sorting and degradation	1.19531	3.39039e-164	1.9127e-165	K02184//formin 2;K14325//RNA-binding protein with serine-rich domain 1+ko03015//mRNA surveillance pathway+ko03013//RNA transport;K10956//protein transport protein SEC61 subunit alpha+ko04145//Phagosome+ko04141//Protein processing in endoplasmic reticulum+ko03060//Protein export;K14325//RNA-binding protein with serine-rich domain 1+ko03015//mRNA surveillance pathway+ko03013//RNA transport	Common central domain of tyrosinase		ortho-aminophenol oxidase [Ectocarpus siliculosus]	[R] KOG1721 FOG: Zn-finger	Anther-specific proline-rich protein APG (Fragment) OS=Brassica napus GN=APG PE=2 SV=1	GO:0046872//metal ion binding;GO:0016491//oxidoreductase activity
CL1569.Contig2_All	2649	ko04141//Protein processing in endoplasmic reticulum;ko03060//Protein export;ko04145//Phagosome	Genetic Information Processing;Cellular Processes	Transport and catabolism;Folding, sorting and degradation	1.17541	8.32509e-27	1.7385e-27	K10956//protein transport protein SEC61 subunit alpha+ko04145//Phagosome+ko04141//Protein processing in endoplasmic reticulum+ko03060//Protein export;K10956//protein transport protein SEC61 subunit alpha+ko04145//Phagosome+ko04141//Protein processing in endoplasmic reticulum+ko03060//Protein export;K10956//protein transport protein SEC61 subunit alpha+ko04145//Phagosome+ko04141//Protein processin…	SecY translocase	XM_009516665.1 Phytophthora sojae hypothetical protein mRNA	putative Sec61/secY [Ectocarpus siliculosus]	[UO] KOG1373 Transport protein Sec61, alpha subunit	Protein transport protein Sec61 subunit alpha OS=Pyrenomonas salina PE=2 SV=1
Unigene26703_All	719	ko04141//Protein processing in endoplasmic reticulum	Genetic Information Processing	Folding, sorting and degradation	1.05306	0.000571932	0.000423043	K14026//SEL1 protein+ko04141//Protein processing in endoplasmic reticulum	Concanavalin A-like lectin/glucanases superfamily		hypothetical protein AURANDRAFT_60775 [Aureococcus anophagefferens] >EGB12742.1 hypothetical protein AURANDRAFT_60775 [Aureococcus anophagefferens]			GO:0016021//integral component of membrane
CL10904.Contig1_All	1093	ko04141//Protein processing in endoplasmic reticulum;ko04145//Phagosome;ko03060//Protein export	Genetic Information Processing;Cellular Processes	Transport and catabolism;Folding, sorting and degradation	1.03881	0	0	K07342//protein transport protein SEC61 subunit gamma and related proteins+ko04145//Phagosome+ko04141//Protein processing in endoplasmic reticulum+ko03060//Protein export;K07342//protein transport protein SEC61 subunit gamma and related proteins+ko04145//Phagosome+ko04141//Protein processing in endoplasmic reticulum+ko03060//Protein export;K07342//protein transport protein SEC61 subunit gamma and…			predicted protein [Thalassiosira pseudonana CCMP1335] >ACI64116.1 predicted protein [Thalassiosira pseudonana CCMP1335]	[U] KOG3498 Preprotein translocase, gamma subunit	Protein transport protein Sec61 subunit gamma-3 OS=Arabidopsis thaliana GN=SEC61G3 PE=1 SV=1	GO:0006605//protein targeting;GO:0015450//P-P-bond-hydrolysis-driven protein transmembrane transporter activity;GO:0005622//intracellular;GO:0016021//integral component of membrane
Unigene13901_All	12184	ko04141//Protein processing in endoplasmic reticulum;ko00052//Galactose metabolism;ko00040//Pentose and glucuronate interconversions;ko01100//Metabolic pathways;ko03420//Nucleotide excision repair;ko00520//Amino sugar and nucleotide sugar metabolism;ko00053//Ascorbate and aldarate metabolism	Metabolism;Genetic Information Processing	Carbohydrate metabolism;Replication and repair;Folding, sorting and degradation;Global and overview maps	-1.00362	6.15232e-97	5.1277e-98	K12447//UDP-sugar pyrophosphorylase [EC:2.7.7.64]+ko00520//Amino sugar and nucleotide sugar metabolism+ko00040//Pentose and glucuronate interconversions+ko01100//Metabolic pathways+ko00052//Galactose metabolism+ko00053//Ascorbate and aldarate metabolism;K10839//UV excision repair protein RAD23+ko04141//Protein processing in endoplasmic reticulum+ko03420//Nucleotide excision repair;K04650//nuclear…	Sporulation inhibitor A		carbohydrate-binding protein [Thraustotheca clavata]	[T] KOG4743 Cyclin-dependent kinase inhibitor	Myrosinase-binding protein 2 OS=Arabidopsis thaliana GN=MBP2 PE=2 SV=1
CL1296.Contig2_All	1588	ko04141//Protein processing in endoplasmic reticulum;ko04120//Ubiquitin mediated proteolysis	Genetic Information Processing	Folding, sorting and degradation	-1.01115	1.32642e-13	4.36257e-14	K03094//S-phase kinase-associated protein 1+ko04141//Protein processing in endoplasmic reticulum+ko04120//Ubiquitin mediated proteolysis;K03094//S-phase kinase-associated protein 1+ko04141//Protein processing in endoplasmic reticulum+ko04120//Ubiquitin mediated proteolysis;K03094//S-phase kinase-associated protein 1+ko04141//Protein processing in endoplasmic reticulum+ko04120//Ubiquitin mediated …	Skp1 family, tetramerisation domain		conserved unknown protein [Ectocarpus siliculosus]	[O] KOG1724 SCF ubiquitin ligase, Skp1 component	SKP1-like protein 12 OS=Arabidopsis thaliana GN=ASK12 PE=1 SV=1	GO:0006511//ubiquitin-dependent protein catabolic process
CL1596.Contig3_All	1262	ko04141//Protein processing in endoplasmic reticulum	Genetic Information Processing	Folding, sorting and degradation	-1.01541	2.73512e-15	8.33564e-16	K10088//protein OS-9+ko04141//Protein processing in endoplasmic reticulum;K10088//protein OS-9+ko04141//Protein processing in endoplasmic reticulum;K10088//protein OS-9+ko04141//Protein processing in endoplasmic reticulum	Glucosidase II beta subunit-like protein	CP018159.1 Oryza sativa Indica Group cultivar Shuhui498 chromosome 3 sequence	Mannose-6-phosphate receptor binding domain protein [Nannochloropsis gaditana]	[R] KOG3394 Protein OS-9	Protein OS-9 homolog OS=Arabidopsis thaliana GN=OS9 PE=1 SV=1
Unigene44742_All	1516	ko03013//RNA transport;ko04141//Protein processing in endoplasmic reticulum	Genetic Information Processing	Folding, sorting and degradation;Translation	-1.02543	1.92789e-05	1.15331e-05	K14004//protein transport protein SEC13+ko04141//Protein processing in endoplasmic reticulum+ko03013//RNA transport	WD domain, G-beta repeat		Protein transport protein SEC13 [Phytophthora megakarya]	[U] KOG1332 Vesicle coat complex COPII, subunit SEC13	Protein transport protein SEC13 homolog B OS=Arabidopsis thaliana GN=SEC13B PE=1 SV=1
CL6351.Contig2_All	1290	ko04120//Ubiquitin mediated proteolysis;ko04141//Protein processing in endoplasmic reticulum	Genetic Information Processing	Folding, sorting and degradation	-1.02905	1.20187e-13	3.94373e-14	K10601//E3 ubiquitin-protein ligase synoviolin [EC:2.3.2.27]+ko04141//Protein processing in endoplasmic reticulum+ko04120//Ubiquitin mediated proteolysis	Nuclear RNA-splicing-associated protein	XM_005761835.1 Emiliania huxleyi CCMP1516 hypothetical protein partial mRNA	transcription factor jumonji domain-containing protein [Volvox carteri f. nagariensis] >EFJ47028.1 transcription factor jumonji domain-containing protein [Volvox carteri f. nagariensis]	[K] KOG4210 Nuclear localization sequence binding protein	Flagellar radial spoke protein 2 OS=Chlamydomonas reinhardtii GN=RSP2 PE=1 SV=1
Unigene5710_All	655	ko04141//Protein processing in endoplasmic reticulum	Genetic Information Processing	Folding, sorting and degradation	-1.03472	6.72167e-05	4.29888e-05	K14007//protein transport protein SEC24+ko04141//Protein processing in endoplasmic reticulum;K14007//protein transport protein SEC24+ko04141//Protein processing in endoplasmic reticulum	Sec23/Sec24 trunk domain		hypothetical protein PHYSODRAFT_250643 [Phytophthora sojae] >EGZ11592.1 hypothetical protein PHYSODRAFT_250643 [Phytophthora sojae]	[U] KOG1985 Vesicle coat complex COPII, subunit SEC24/subunit SFB2	Protein transport protein Sec24-like CEF OS=Arabidopsis thaliana GN=CEF PE=2 SV=3	GO:0006886//intracellular protein transport;GO:0030127//COPII vesicle coat;GO:0008270//zinc ion binding;GO:0006888//ER to Golgi vesicle-mediated transport
Unigene19624_All	3550	ko01100//Metabolic pathways;ko04141//Protein processing in endoplasmic reticulum;ko00510//N-Glycan biosynthesis	Genetic Information Processing;Metabolism	Global and overview maps;Glycan biosynthesis and metabolism;Folding, sorting and degradation	-1.04468	6.30816e-182	3.27077e-183	K01230//mannosyl-oligosaccharide alpha-1,2-mannosidase [EC:3.2.1.113]+ko04141//Protein processing in endoplasmic reticulum+ko00510//N-Glycan biosynthesis+ko01100//Metabolic pathways;K01230//mannosyl-oligosaccharide alpha-1,2-mannosidase [EC:3.2.1.113]+ko04141//Protein processing in endoplasmic reticulum+ko00510//N-Glycan biosynthesis+ko01100//Metabolic pathways;K01230//mannosyl-oligosaccharide al…	Glycosyl hydrolase family 47	XM_009037339.1 Aureococcus anophagefferens hypothetical protein partial mRNA	Mannosyl-oligosaccharide 1,2-alpha-mannosidase, family GH47 [Ectocarpus siliculosus]	[G] KOG2204 Mannosyl-oligosaccharide alpha-1,2-mannosidase and related glycosyl hydrolases	Mannosyl-oligosaccharide 1,2-alpha-mannosidase MNS1 OS=Arabidopsis thaliana GN=MNS1 PE=1 SV=1	GO:0016020//membrane;GO:0003723//RNA binding;GO:0005783//endoplasmic reticulum;GO:0005622//intracellular;GO:0006491//N-glycan processing;GO:0000139//Golgi membrane;GO:0005509//calcium ion binding;GO:0004571//mannosyl-oligosaccharide 1,2-alpha-mannosidase activity;GO:0005525//GTP binding
Unigene38529_All	1430	ko04141//Protein processing in endoplasmic reticulum	Genetic Information Processing	Folding, sorting and degradation	-1.04737	1.18765e-59	1.41456e-60	K14007//protein transport protein SEC24+ko04141//Protein processing in endoplasmic reticulum	Fe-S metabolism associated domain		hypothetical protein L915_18772 [Plasmopara halstedii]		Formin-like protein 18 OS=Oryza sativa subsp. japonica GN=FH18 PE=2 SV=1
CL1744.Contig8_All	6736	ko01110//Biosynthesis of secondary metabolites;ko01100//Metabolic pathways;ko03420//Nucleotide excision repair;ko00940//Phenylpropanoid biosynthesis;ko04141//Protein processing in endoplasmic reticulum	Metabolism;Genetic Information Processing	Biosynthesis of other secondary metabolites;Folding, sorting and degradation;Global and overview maps;Replication and repair	-1.04796	1.7387e-12	6.03677e-13	K00430//peroxidase [EC:1.11.1.7]+ko01100//Metabolic pathways+ko01110//Biosynthesis of secondary metabolites+ko00940//Phenylpropanoid biosynthesis;K10839//UV excision repair protein RAD23+ko04141//Protein processing in endoplasmic reticulum+ko03420//Nucleotide excision repair	Homeobox KN domain		hypothetical protein GUITHDRAFT_119564 [Guillardia theta CCMP2712] >EKX34274.1 hypothetical protein GUITHDRAFT_119564 [Guillardia theta CCMP2712]	[J] KOG2975 Translation initiation factor 3, subunit f (eIF-3f)	Classical arabinogalactan protein 9 OS=Arabidopsis thaliana GN=AGP9 PE=1 SV=2
CL11111.Contig3_All	1494	ko04145//Phagosome;ko03020//RNA polymerase;ko03060//Protein export;ko04141//Protein processing in endoplasmic reticulum	Cellular Processes;Genetic Information Processing	Transcription;Folding, sorting and degradation;Transport and catabolism	-1.05417	1.48676e-06	7.84936e-07	K10956//protein transport protein SEC61 subunit alpha+ko04145//Phagosome+ko04141//Protein processing in endoplasmic reticulum+ko03060//Protein export;K03006//DNA-directed RNA polymerase II subunit RPB1 [EC:2.7.7.6]+ko03020//RNA polymerase			hypothetical protein H257_17087 [Aphanomyces astaci] >ETV66525.1 hypothetical protein H257_17087 [Aphanomyces astaci]		Vegetative cell wall protein gp1 OS=Chlamydomonas reinhardtii GN=GP1 PE=1 SV=1	GO:0016021//integral component of membrane
CL1253.Contig2_All	1589	ko04141//Protein processing in endoplasmic reticulum;ko03015//mRNA surveillance pathway;ko03013//RNA transport	Genetic Information Processing	Translation;Folding, sorting and degradation	-1.06405	7.31105e-12	2.63045e-12	K14007//protein transport protein SEC24+ko04141//Protein processing in endoplasmic reticulum;K13171//serine/arginine repetitive matrix protein 1+ko03015//mRNA surveillance pathway+ko03013//RNA transport	His Kinase A (phospho-acceptor) domain		hypothetical protein BU14_0077s0056 [Porphyra umbilicalis]
Unigene33065_All	1641	ko03420//Nucleotide excision repair;ko04141//Protein processing in endoplasmic reticulum	Genetic Information Processing	Replication and repair;Folding, sorting and degradation	-1.06416	1.15983e-101	9.37981e-103	K10839//UV excision repair protein RAD23+ko04141//Protein processing in endoplasmic reticulum+ko03420//Nucleotide excision repair;K10839//UV excision repair protein RAD23+ko04141//Protein processing in endoplasmic reticulum+ko03420//Nucleotide excision repair	UBA/TS-N domain		UV excision repair protein Rad23 [Phytophthora parasitica] >ETO60656.1 UV excision repair protein Rad23 [Phytophthora parasitica P1976]	[L] KOG0011 Nucleotide excision repair factor NEF2, RAD23 component	Ubiquitin receptor RAD23c OS=Arabidopsis thaliana GN=RAD23C PE=1 SV=2
CL700.Contig1_All	2303	ko04141//Protein processing in endoplasmic reticulum	Genetic Information Processing	Folding, sorting and degradation	-1.06625	1.12443e-08	4.95109e-09	K22020//mucin-19;K14007//protein transport protein SEC24+ko04141//Protein processing in endoplasmic reticulum;K02184//formin 2	Flavodoxin		hornerin-like, partial [Zea mays]	[W] KOG3544 Collagens (type IV and type XIII), and related proteins	Serine/arginine-rich splicing factor SR45 OS=Arabidopsis thaliana GN=SR45 PE=1 SV=1
CL7975.Contig1_All	1367	ko04141//Protein processing in endoplasmic reticulum;ko01100//Metabolic pathways;ko00940//Phenylpropanoid biosynthesis;ko01110//Biosynthesis of secondary metabolites	Metabolism;Genetic Information Processing	Biosynthesis of other secondary metabolites;Global and overview maps;Folding, sorting and degradation	-1.07586	4.77132e-23	1.09858e-23	K14007//protein transport protein SEC24+ko04141//Protein processing in endoplasmic reticulum;K00430//peroxidase [EC:1.11.1.7]+ko01100//Metabolic pathways+ko01110//Biosynthesis of secondary metabolites+ko00940//Phenylpropanoid biosynthesis;K00430//peroxidase [EC:1.11.1.7]+ko01100//Metabolic pathways+ko01110//Biosynthesis of secondary metabolites+ko00940//Phenylpropanoid biosynthesis;K00430//peroxi…	Zinc finger, C3HC4 type (RING finger)		predicted protein [Ostreococcus lucimarinus CCE9901] >ABO96650.1 predicted protein [Ostreococcus lucimarinus CCE9901]	[T] KOG1187 Serine/threonine protein kinase	Proline-rich receptor-like protein kinase PERK8 OS=Arabidopsis thaliana GN=PERK8 PE=1 SV=1	GO:0004842//ubiquitin-protein transferase activity
CL7932.Contig1_All	2896	ko04141//Protein processing in endoplasmic reticulum	Genetic Information Processing	Folding, sorting and degradation	-1.07601	1.68817e-20	4.21392e-21	K08288//protein kinase C substrate 80K-H+ko04141//Protein processing in endoplasmic reticulum;K08288//protein kinase C substrate 80K-H+ko04141//Protein processing in endoplasmic reticulum;K08288//protein kinase C substrate 80K-H+ko04141//Protein processing in endoplasmic reticulum;K08288//protein kinase C substrate 80K-H+ko04141//Protein processing in endoplasmic reticulum;K08288//protein kinase …	Glucosidase II beta subunit-like	XM_021989953.1 PREDICTED: Spinacia oleracea glucosidase 2 subunit beta (LOC110785502), mRNA	glucosidase 2 subunit beta, putative [Phytophthora infestans T30-4] >EEY53347.1 glucosidase 2 subunit beta, putative [Phytophthora infestans T30-4]	[T] KOG2397 Protein kinase C substrate, 80 KD protein, heavy chain	Glucosidase 2 subunit beta OS=Arabidopsis thaliana GN=PSL4 PE=2 SV=1	GO:0006491//N-glycan processing
CL8344.Contig1_All	520	ko04141//Protein processing in endoplasmic reticulum;ko03420//Nucleotide excision repair;ko00040//Pentose and glucuronate interconversions;ko00520//Amino sugar and nucleotide sugar metabolism;ko00053//Ascorbate and aldarate metabolism;ko00052//Galactose metabolism;ko04626//Plant-pathogen interaction;ko01100//Metabolic pathways	Genetic Information Processing;Metabolism;Organismal Systems	Folding, sorting and degradation;Environmental adaptation;Carbohydrate metabolism;Replication and repair;Global and overview maps	-1.09124	6.73133e-07	3.44415e-07	K10839//UV excision repair protein RAD23+ko04141//Protein processing in endoplasmic reticulum+ko03420//Nucleotide excision repair;K10839//UV excision repair protein RAD23+ko04141//Protein processing in endoplasmic reticulum+ko03420//Nucleotide excision repair;K13412//calcium-dependent protein kinase [EC:2.7.11.1]+ko04626//Plant-pathogen interaction;K12447//UDP-sugar pyrophosphorylase [EC:2.7.7.64…	Bacterial DNA-binding protein		hypothetical protein L916_00891 [Phytophthora parasitica]	[R] TWOG0094 Lectins containing Jacalin domain	Myrosinase-binding protein 2 OS=Arabidopsis thaliana GN=MBP2 PE=2 SV=1
CL4445.Contig2_All	3302	ko04141//Protein processing in endoplasmic reticulum	Genetic Information Processing	Folding, sorting and degradation	-1.09592	6.10924e-37	1.01996e-37	K02184//formin 2;K14007//protein transport protein SEC24+ko04141//Protein processing in endoplasmic reticulum;K02184//formin 2;K02184//formin 2;K02184//formin 2	Thyroglobulin_1 repeat associated disordered domain		hypothetical protein EMIHUDRAFT_465583 [Emiliania huxleyi CCMP1516] >EOD08380.1 hypothetical protein EMIHUDRAFT_465583 [Emiliania huxleyi CCMP1516]	[W] KOG3544 Collagens (type IV and type XIII), and related proteins	Formin-like protein 5 OS=Oryza sativa subsp. japonica GN=FH5 PE=2 SV=2	GO:0005509//calcium ion binding;GO:0016021//integral component of membrane
CL11364.Contig2_All	3795	ko04141//Protein processing in endoplasmic reticulum	Genetic Information Processing	Folding, sorting and degradation	-1.09948	8.50308e-82	7.99336e-83	K08653//membrane-bound transcription factor site-1 protease [EC:3.4.21.112]+ko04141//Protein processing in endoplasmic reticulum;K08653//membrane-bound transcription factor site-1 protease [EC:3.4.21.112]+ko04141//Protein processing in endoplasmic reticulum;K08653//membrane-bound transcription factor site-1 protease [EC:3.4.21.112]+ko04141//Protein processing in endoplasmic reticulum;K08653//memb…	Subtilase family	AP015044.1 Vigna angularis var. angularis DNA, chromosome 11, almost complete sequence, cultivar: Shumari	hypothetical protein TanjilG_00102 [Lupinus angustifolius]	[O] KOG4266 Subtilisin kexin isozyme-1/site 1 protease, subtilase superfamily	Formin-like protein 20 OS=Arabidopsis thaliana GN=FH20 PE=2 SV=3	GO:0004252//serine-type endopeptidase activity;GO:0016021//integral component of membrane
CL7209.Contig2_All	675	ko04141//Protein processing in endoplasmic reticulum	Genetic Information Processing	Folding, sorting and degradation	-1.10922	3.69586e-05	2.28863e-05	K14018//phospholipase A-2-activating protein+ko04141//Protein processing in endoplasmic reticulum;K14018//phospholipase A-2-activating protein+ko04141//Protein processing in endoplasmic reticulum	PFU (PLAA family ubiquitin binding)	XM_014039851.1 Monoraphidium neglectum NIMA (never in mitosis a)-related kinase mRNA	conserved unknown protein [Ectocarpus siliculosus]	[A] KOG2375 Protein interacting with poly(A)-binding protein	Oleosin-B6 OS=Brassica napus GN=OlnB6 PE=1 SV=3	GO:0043130//ubiquitin binding;GO:0005634//nucleus;GO:0043161//proteasome-mediated ubiquitin-dependent protein catabolic process;GO:0010992//ubiquitin recycling;GO:0005737//cytoplasm
Unigene9229_All	4559	ko04141//Protein processing in endoplasmic reticulum	Genetic Information Processing	Folding, sorting and degradation	-1.14114	7.98479e-182	4.1417e-183	K14018//phospholipase A-2-activating protein+ko04141//Protein processing in endoplasmic reticulum;K14018//phospholipase A-2-activating protein+ko04141//Protein processing in endoplasmic reticulum;K14018//phospholipase A-2-activating protein+ko04141//Protein processing in endoplasmic reticulum;K19329//WW domain-containing oxidoreductase	short chain dehydrogenase		short-chain alcohol dehydrogenase-like protein [Ectocarpus siliculosus]	[I] KOG0301 Phospholipase A2-activating protein (contains WD40 repeats)	Salutaridine reductase OS=Papaver bracteatum GN=SALR PE=1 SV=1
Unigene76306_All	787	ko04141//Protein processing in endoplasmic reticulum	Genetic Information Processing	Folding, sorting and degradation	-1.17041	6.7642e-06	3.83672e-06	K02184//formin 2;K14007//protein transport protein SEC24+ko04141//Protein processing in endoplasmic reticulum;K02184//formin 2	Grap2 and cyclin-D-interacting		hypothetical protein BU14_1177s0001, partial [Porphyra umbilicalis]	[W] KOG3544 Collagens (type IV and type XIII), and related proteins	Formin-like protein 7 OS=Oryza sativa subsp. japonica GN=FH7 PE=3 SV=2
CL8917.Contig1_All	1925	ko04120//Ubiquitin mediated proteolysis;ko04141//Protein processing in endoplasmic reticulum	Genetic Information Processing	Folding, sorting and degradation	-1.17596	8.03427e-29	1.59698e-29	K10601//E3 ubiquitin-protein ligase synoviolin [EC:2.3.2.27]+ko04141//Protein processing in endoplasmic reticulum+ko04120//Ubiquitin mediated proteolysis;K10601//E3 ubiquitin-protein ligase synoviolin [EC:2.3.2.27]+ko04141//Protein processing in endoplasmic reticulum+ko04120//Ubiquitin mediated proteolysis;K10601//E3 ubiquitin-protein ligase synoviolin [EC:2.3.2.27]+ko04141//Protein processing in…	Ring finger domain		Zinc finger, RING-type [Nannochloropsis gaditana]	[O] KOG0802 E3 ubiquitin ligase	ERAD-associated E3 ubiquitin-protein ligase HRD1 OS=Oryza sativa subsp. japonica GN=HRD1 PE=2 SV=1	GO:0016021//integral component of membrane
Unigene45994_All	403	ko04141//Protein processing in endoplasmic reticulum	Genetic Information Processing	Folding, sorting and degradation	-1.17736	0.000753976	0.000568236	K10636//autocrine motility factor receptor [EC:2.3.2.27]+ko04141//Protein processing in endoplasmic reticulum;K10636//autocrine motility factor receptor [EC:2.3.2.27]+ko04141//Protein processing in endoplasmic reticulum	Fructose-bisphosphate aldolase class-II		hypothetical protein BU14_0023s0026 [Porphyra umbilicalis]
Unigene1606_All	885	ko03015//mRNA surveillance pathway;ko04144//Endocytosis;ko03013//RNA transport;ko04141//Protein processing in endoplasmic reticulum	Genetic Information Processing;Cellular Processes	Folding, sorting and degradation;Translation;Transport and catabolism	-1.18873	1.83243e-11	6.73556e-12	K13171//serine/arginine repetitive matrix protein 1+ko03015//mRNA surveillance pathway+ko03013//RNA transport;K14007//protein transport protein SEC24+ko04141//Protein processing in endoplasmic reticulum;K02184//formin 2;K05747//Wiskott-Aldrich syndrome protein+ko04144//Endocytosis;K14007//protein transport protein SEC24+ko04141//Protein processing in endoplasmic reticulum	SPRY domain		hypothetical protein H257_10574 [Aphanomyces astaci] >ETV74968.1 hypothetical protein H257_10574 [Aphanomyces astaci]	[W] KOG3544 Collagens (type IV and type XIII), and related proteins	Chitin-binding lectin 1 OS=Solanum tuberosum PE=1 SV=2	GO:0004842//ubiquitin-protein transferase activity
Unigene33568_All	904	ko04141//Protein processing in endoplasmic reticulum	Genetic Information Processing	Folding, sorting and degradation	-1.19807	1.81113e-18	4.8578e-19	K10666//E3 ubiquitin-protein ligase RNF5 [EC:2.3.2.27]+ko04141//Protein processing in endoplasmic reticulum;K10666//E3 ubiquitin-protein ligase RNF5 [EC:2.3.2.27]+ko04141//Protein processing in endoplasmic reticulum;K10666//E3 ubiquitin-protein ligase RNF5 [EC:2.3.2.27]+ko04141//Protein processing in endoplasmic reticulum;K10666//E3 ubiquitin-protein ligase RNF5 [EC:2.3.2.27]+ko04141//Protein pro…	Zinc finger, C3HC4 type (RING finger)		PREDICTED: E3 ubiquitin-protein ligase RNF185-like [Nicotiana attenuata] >OIT05805.1 e3 ubiquitin-protein ligase rma1h1 [Nicotiana attenuata]	[O] KOG0823 Predicted E3 ubiquitin ligase	E3 ubiquitin-protein ligase RMA1H1 OS=Capsicum annuum GN=RMA1H1 PE=1 SV=1	GO:0016021//integral component of membrane;GO:0016874//ligase activity
Unigene30034_All	1573	ko01110//Biosynthesis of secondary metabolites;ko01100//Metabolic pathways;ko00710//Carbon fixation in photosynthetic organisms;ko00010//Glycolysis / Gluconeogenesis;ko01230//Biosynthesis of amino acids;ko01200//Carbon metabolism;ko04141//Protein processing in endoplasmic reticulum	Genetic Information Processing;Metabolism	Carbohydrate metabolism;Global and overview maps;Energy metabolism;Folding, sorting and degradation	-1.23371	0.00016277	0.000109761	K00134//glyceraldehyde 3-phosphate dehydrogenase [EC:1.2.1.12]+ko00010//Glycolysis / Gluconeogenesis+ko01230//Biosynthesis of amino acids+ko01100//Metabolic pathways+ko01110//Biosynthesis of secondary metabolites+ko00710//Carbon fixation in photosynthetic organisms+ko01200//Carbon metabolism;K08653//membrane-bound transcription factor site-1 protease [EC:3.4.21.112]+ko04141//Protein processing in…	Subtilase family		hypothetical protein VOLCADRAFT_88007 [Volvox carteri f. nagariensis] >EFJ51185.1 hypothetical protein VOLCADRAFT_88007 [Volvox carteri f. nagariensis]	[O] KOG1153 Subtilisin-related protease/Vacuolar protease B	Subtilisin-like protease SBT1.9 OS=Arabidopsis thaliana GN=SBT1.9 PE=2 SV=1	GO:0004252//serine-type endopeptidase activity;GO:0016021//integral component of membrane
Unigene4835_All	860	ko04141//Protein processing in endoplasmic reticulum	Genetic Information Processing	Folding, sorting and degradation	-1.24086	9.31218e-11	3.58043e-11	K14018//phospholipase A-2-activating protein+ko04141//Protein processing in endoplasmic reticulum	WD domain, G-beta repeat	XM_009524891.1 Phytophthora sojae hypothetical protein partial mRNA	conserved unknown protein [Ectocarpus siliculosus]	[R] KOG0286 G-protein beta subunit	Guanine nucleotide-binding protein subunit beta-like protein OS=Chlamydomonas reinhardtii GN=GBLP PE=2 SV=1	GO:0043130//ubiquitin binding;GO:0005634//nucleus;GO:0043161//proteasome-mediated ubiquitin-dependent protein catabolic process;GO:0010992//ubiquitin recycling;GO:0005737//cytoplasm
CL1589.Contig1_All	632	ko04141//Protein processing in endoplasmic reticulum	Genetic Information Processing	Folding, sorting and degradation	-1.26508	6.03538e-05	3.83422e-05	K14026//SEL1 protein+ko04141//Protein processing in endoplasmic reticulum	Sel1 repeat		F-box protein At1g70590-like [Chenopodium quinoa]	[MOT] KOG1550 Extracellular protein SEL-1 and related proteins	F-box protein At1g70590 OS=Arabidopsis thaliana GN=At1g70590 PE=2 SV=1
Unigene42617_All	570	ko04141//Protein processing in endoplasmic reticulum	Genetic Information Processing	Folding, sorting and degradation	-1.27144	6.85302e-05	4.38867e-05	K02519//translation initiation factor IF-2;K11294//nucleolin;K22020//mucin-19;K14007//protein transport protein SEC24+ko04141//Protein processing in endoplasmic reticulum	Proline-rich nuclear receptor coactivator		hypothetical protein BU14_0234s0018 [Porphyra umbilicalis]	[W] KOG3544 Collagens (type IV and type XIII), and related proteins	Oleosin-B6 OS=Brassica napus GN=OlnB6 PE=1 SV=3	GO:0004674//protein serine/threonine kinase activity;GO:0005524//ATP binding;GO:0016021//integral component of membrane
Unigene21785_All	1467	ko04145//Phagosome;ko04141//Protein processing in endoplasmic reticulum;ko03015//mRNA surveillance pathway;ko03060//Protein export;ko03013//RNA transport	Cellular Processes;Genetic Information Processing	Transport and catabolism;Translation;Folding, sorting and degradation	-1.2861	1.92673e-11	7.09222e-12	K17987//next to BRCA1 gene 1 protein;K10956//protein transport protein SEC61 subunit alpha+ko04145//Phagosome+ko04141//Protein processing in endoplasmic reticulum+ko03060//Protein export;K14306//nuclear pore complex protein Nup62+ko03013//RNA transport;K13171//serine/arginine repetitive matrix protein 1+ko03015//mRNA surveillance pathway+ko03013//RNA transport			EsV-1-7 [Ectocarpus siliculosus]	[R] KOG0825 PHD Zn-finger protein	Holliday junction resolvase MOC1, chloroplastic OS=Chlamydomonas reinhardtii GN=MOC1 PE=3 SV=2
Unigene33397_All	1079	ko04141//Protein processing in endoplasmic reticulum;ko03013//RNA transport	Genetic Information Processing	Translation;Folding, sorting and degradation	-1.30648	1.39298e-08	6.18485e-09	K14007//protein transport protein SEC24+ko04141//Protein processing in endoplasmic reticulum;K17987//next to BRCA1 gene 1 protein;K14306//nuclear pore complex protein Nup62+ko03013//RNA transport;K14306//nuclear pore complex protein Nup62+ko03013//RNA transport;K14306//nuclear pore complex protein Nup62+ko03013//RNA transport	HEAT repeat		uncharacterized protein DDB_G0271670, partial [Zea mays]	[GO] KOG4157 beta-1,6-N-acetylglucosaminyltransferase, contains WSC domain	Lysine-rich arabinogalactan protein 19 OS=Arabidopsis thaliana GN=AGP19 PE=2 SV=2
CL7612.Contig1_All	1955	ko01100//Metabolic pathways;ko00040//Pentose and glucuronate interconversions;ko04141//Protein processing in endoplasmic reticulum	Genetic Information Processing;Metabolism	Carbohydrate metabolism;Folding, sorting and degradation;Global and overview maps	-1.30941	4.56621e-22	1.0824e-22	K02184//formin 2;K22020//mucin-19;K14007//protein transport protein SEC24+ko04141//Protein processing in endoplasmic reticulum;K01051//pectinesterase [EC:3.1.1.11]+ko00040//Pentose and glucuronate interconversions+ko01100//Metabolic pathways			plus agglutinin, partial [Chlamydomonas incerta]	[M] LSE0601 A Pollen extensin-like protein (Pex)	Leucine-rich repeat extensin-like protein 5 OS=Arabidopsis thaliana GN=LRX5 PE=2 SV=2
Unigene26744_All	491	ko04141//Protein processing in endoplasmic reticulum	Genetic Information Processing	Folding, sorting and degradation	-1.33697	1.35532e-16	3.919e-17	K04733//interleukin-1 receptor-associated kinase 4 [EC:2.7.11.1];K04733//interleukin-1 receptor-associated kinase 4 [EC:2.7.11.1];K14007//protein transport protein SEC24+ko04141//Protein processing in endoplasmic reticulum;K04733//interleukin-1 receptor-associated kinase 4 [EC:2.7.11.1]			PREDICTED: classical arabinogalactan protein 9-like [Nicotiana attenuata] >OIT21956.1 hypothetical protein A4A49_32520 [Nicotiana attenuata]	[WV] KOG1216 von Willebrand factor and related coagulation proteins	Proline-rich receptor-like protein kinase PERK1 OS=Arabidopsis thaliana GN=PERK1 PE=2 SV=1	GO:0005199//structural constituent of cell wall;GO:0008233//peptidase activity
CL5651.Contig2_All	3461	ko01100//Metabolic pathways;ko00510//N-Glycan biosynthesis;ko04141//Protein processing in endoplasmic reticulum	Metabolism;Genetic Information Processing	Folding, sorting and degradation;Glycan biosynthesis and metabolism;Global and overview maps	-1.33844	6.81479e-132	4.56827e-133	K05546//mannosyl-oligosaccharide alpha-1,3-glucosidase [EC:3.2.1.207]+ko04141//Protein processing in endoplasmic reticulum+ko00510//N-Glycan biosynthesis+ko01100//Metabolic pathways;K05546//mannosyl-oligosaccharide alpha-1,3-glucosidase [EC:3.2.1.207]+ko04141//Protein processing in endoplasmic reticulum+ko00510//N-Glycan biosynthesis+ko01100//Metabolic pathways;K05546//mannosyl-oligosaccharide al…	Glycosyl hydrolases family 31	XM_005771367.1 Emiliania huxleyi CCMP1516 hypothetical protein mRNA	hypothetical protein AURANDRAFT_70514 [Aureococcus anophagefferens] >EGB13139.1 hypothetical protein AURANDRAFT_70514 [Aureococcus anophagefferens]	[GMO] KOG1066 Glucosidase II catalytic (alpha) subunit and related enzymes, glycosyl hydrolase family 31	Probable glucan 1,3-alpha-glucosidase OS=Arabidopsis thaliana GN=PSL5 PE=1 SV=1	GO:0004553//hydrolase activity, hydrolyzing O-glycosyl compounds;GO:0030246//carbohydrate binding;GO:0005975//carbohydrate metabolic process
CL8027.Contig3_All	3372	ko04141//Protein processing in endoplasmic reticulum;ko03060//Protein export	Genetic Information Processing	Folding, sorting and degradation	-1.34594	1.4172e-297	4.92536e-299	K09490//heat shock 70kDa protein 5+ko04141//Protein processing in endoplasmic reticulum+ko03060//Protein export;K09490//heat shock 70kDa protein 5+ko04141//Protein processing in endoplasmic reticulum+ko03060//Protein export;K09490//heat shock 70kDa protein 5+ko04141//Protein processing in endoplasmic reticulum+ko03060//Protein export;K09490//heat shock 70kDa protein 5+ko04141//Protein processing …	Hsp70 protein	XM_009034796.1 Aureococcus anophagefferens hypothetical protein mRNA	heat shock 70kDa protein 5 [Fistulifera solaris]	[O] KOG0100 Molecular chaperones GRP78/BiP/KAR2, HSP70 superfamily	Luminal-binding protein 4 OS=Nicotiana tabacum GN=BIP4 PE=2 SV=1	GO:0005524//ATP binding
CL8804.Contig1_All	952	ko04141//Protein processing in endoplasmic reticulum	Genetic Information Processing	Folding, sorting and degradation	-1.36605	2.44976e-12	8.57651e-13	K14012//UBX domain-containing protein 1+ko04141//Protein processing in endoplasmic reticulum;K14012//UBX domain-containing protein 1+ko04141//Protein processing in endoplasmic reticulum;K14012//UBX domain-containing protein 1+ko04141//Protein processing in endoplasmic reticulum;K14012//UBX domain-containing protein 1+ko04141//Protein processing in endoplasmic reticulum;K14012//UBX domain-containi…			unnamed protein product [Albugo candida]	[Y] KOG2086 Protein tyrosine phosphatase SHP1/Cofactor for p97 ATPase-mediated vesicle membrane fusion	Plant UBX domain-containing protein 5 OS=Arabidopsis thaliana GN=PUX5 PE=1 SV=1
Unigene18979_All	590	ko03040//Spliceosome;ko04144//Endocytosis;ko04141//Protein processing in endoplasmic reticulum	Genetic Information Processing;Cellular Processes	Transcription;Transport and catabolism;Folding, sorting and degradation	-1.37361	3.20915e-14	1.02624e-14	K03283//heat shock 70kDa protein 1/2/6/8+ko03040//Spliceosome+ko04144//Endocytosis+ko04141//Protein processing in endoplasmic reticulum;K03283//heat shock 70kDa protein 1/2/6/8+ko03040//Spliceosome+ko04144//Endocytosis+ko04141//Protein processing in endoplasmic reticulum;K03283//heat shock 70kDa protein 1/2/6/8+ko03040//Spliceosome+ko04144//Endocytosis+ko04141//Protein processing in endoplasmic r…	Hsp70 protein		hypothetical protein H257_18435 [Aphanomyces astaci] >ETV64719.1 hypothetical protein H257_18435 [Aphanomyces astaci]	[O] KOG0100 Molecular chaperones GRP78/BiP/KAR2, HSP70 superfamily	Luminal-binding protein OS=Spinacia oleracea GN=HSC70 PE=2 SV=1	GO:0005524//ATP binding
Unigene508_All	1217	ko04144//Endocytosis;ko04141//Protein processing in endoplasmic reticulum	Cellular Processes;Genetic Information Processing	Transport and catabolism;Folding, sorting and degradation	-1.39641	2.39021e-24	5.30581e-25	K02184//formin 2;K02184//formin 2;K05747//Wiskott-Aldrich syndrome protein+ko04144//Endocytosis;K02184//formin 2;K14007//protein transport protein SEC24+ko04141//Protein processing in endoplasmic reticulum	Protein of unknown function (DUF1688)		conserved unknown protein [Ectocarpus siliculosus]	[W] KOG3544 Collagens (type IV and type XIII), and related proteins	Classical arabinogalactan protein 9 OS=Arabidopsis thaliana GN=AGP9 PE=1 SV=2
Unigene1877_All	1090	ko00940//Phenylpropanoid biosynthesis;ko01110//Biosynthesis of secondary metabolites;ko03060//Protein export;ko01100//Metabolic pathways;ko04141//Protein processing in endoplasmic reticulum;ko04145//Phagosome	Genetic Information Processing;Metabolism;Cellular Processes	Biosynthesis of other secondary metabolites;Transport and catabolism;Folding, sorting and degradation;Global and overview maps	-1.40005	1.57029e-05	9.27761e-06	K04730//interleukin-1 receptor-associated kinase 1 [EC:2.7.11.1];K17987//next to BRCA1 gene 1 protein;K00430//peroxidase [EC:1.11.1.7]+ko01100//Metabolic pathways+ko01110//Biosynthesis of secondary metabolites+ko00940//Phenylpropanoid biosynthesis;K04733//interleukin-1 receptor-associated kinase 4 [EC:2.7.11.1];K10956//protein transport protein SEC61 subunit alpha+ko04145//Phagosome+ko04141//Prot…			similar to hedgehog protein [Cyanidioschyzon merolae strain 10D] >BAM79537.1 similar to hedgehog protein [Cyanidioschyzon merolae strain 10D]	[R] LSE0026 A Ripening-related protein	Pectinesterase inhibitor 10 OS=Arabidopsis thaliana GN=PMEI10 PE=2 SV=1	GO:0016539//intein-mediated protein splicing;GO:0008233//peptidase activity;GO:0016021//integral component of membrane
Unigene30658_All	571	ko04141//Protein processing in endoplasmic reticulum	Genetic Information Processing	Folding, sorting and degradation	-1.40637	6.70263e-07	3.42893e-07	K02184//formin 2;K02184//formin 2;K14007//protein transport protein SEC24+ko04141//Protein processing in endoplasmic reticulum;K02184//formin 2	WisP family C-Terminal Region		Formin-like protein 20 [Zea mays]	[TZ] KOG1924 RhoA GTPase effector DIA/Diaphanous	Formin-like protein 5 OS=Arabidopsis thaliana GN=FH5 PE=2 SV=2
CL7258.Contig2_All	1018	ko00940//Phenylpropanoid biosynthesis;ko01110//Biosynthesis of secondary metabolites;ko01100//Metabolic pathways;ko04141//Protein processing in endoplasmic reticulum	Genetic Information Processing;Metabolism	Global and overview maps;Folding, sorting and degradation;Biosynthesis of other secondary metabolites	-1.40668	7.37803e-07	3.78795e-07	K02184//formin 2;K14007//protein transport protein SEC24+ko04141//Protein processing in endoplasmic reticulum;K00430//peroxidase [EC:1.11.1.7]+ko01100//Metabolic pathways+ko01110//Biosynthesis of secondary metabolites+ko00940//Phenylpropanoid biosynthesis;K00430//peroxidase [EC:1.11.1.7]+ko01100//Metabolic pathways+ko01110//Biosynthesis of secondary metabolites+ko00940//Phenylpropanoid biosynthes…	Glycosyl transferase family 2		formin-like protein 18 [Aegilops tauschii subsp. tauschii]	[BK] KOG0386 Chromatin remodeling complex SWI/SNF, component SWI2 and related ATPases (DNA/RNA helicase superfamily)	Lysine-rich arabinogalactan protein 19 OS=Arabidopsis thaliana GN=AGP19 PE=2 SV=2
CL8348.Contig2_All	3624	ko04141//Protein processing in endoplasmic reticulum	Genetic Information Processing	Folding, sorting and degradation	-1.42352	4.52861e-79	4.35733e-80	K01456//peptide-N4-(N-acetyl-beta-glucosaminyl)asparagine amidase [EC:3.5.1.52]+ko04141//Protein processing in endoplasmic reticulum;K01456//peptide-N4-(N-acetyl-beta-glucosaminyl)asparagine amidase [EC:3.5.1.52]+ko04141//Protein processing in endoplasmic reticulum;K01456//peptide-N4-(N-acetyl-beta-glucosaminyl)asparagine amidase [EC:3.5.1.52]+ko04141//Protein processing in endoplasmic reticulum	Transglutaminase-like superfamily		hypothetical protein KFL_000730050 [Klebsormidium nitens]	[O] KOG0909 Peptide:N-glycanase	Peptide-N(4)-(N-acetyl-beta-glucosaminyl)asparagine amidase OS=Arabidopsis thaliana GN=PNG1 PE=2 SV=1
CL10918.Contig2_All	1054	ko03008//Ribosome biogenesis in eukaryotes;ko04141//Protein processing in endoplasmic reticulum	Genetic Information Processing	Translation;Folding, sorting and degradation	-1.43138	1.74282e-39	2.77333e-40	K14575//AAA family ATPase+ko03008//Ribosome biogenesis in eukaryotes;K14575//AAA family ATPase+ko03008//Ribosome biogenesis in eukaryotes;K13525//transitional endoplasmic reticulum ATPase+ko04141//Protein processing in endoplasmic reticulum;K14575//AAA family ATPase+ko03008//Ribosome biogenesis in eukaryotes	ATPase family associated with various cellular activities (AAA)	CP018158.1 Oryza sativa Indica Group cultivar Shuhui498 chromosome 2 sequence	hypothetical protein L917_13740, partial [Phytophthora parasitica]	[O] KOG0730 AAA+-type ATPase	Calmodulin-interacting protein 111 OS=Arabidopsis thaliana GN=CIP111 PE=1 SV=1	GO:0005524//ATP binding
CL906.Contig2_All	1366	ko04141//Protein processing in endoplasmic reticulum;ko04145//Phagosome;ko03060//Protein export	Genetic Information Processing;Cellular Processes	Folding, sorting and degradation;Transport and catabolism	-1.4498	9.51278e-56	1.18755e-56	K22020//mucin-19;K10956//protein transport protein SEC61 subunit alpha+ko04145//Phagosome+ko04141//Protein processing in endoplasmic reticulum+ko03060//Protein export	BTB/POZ domain		uncharacterized protein LOC110926720, partial [Helianthus annuus]	[W] KOG3544 Collagens (type IV and type XIII), and related proteins
CL906.Contig3_All	1204	ko04141//Protein processing in endoplasmic reticulum;ko03060//Protein export;ko04145//Phagosome	Genetic Information Processing;Cellular Processes	Transport and catabolism;Folding, sorting and degradation	-1.46213	6.92625e-14	2.2478e-14	K10956//protein transport protein SEC61 subunit alpha+ko04145//Phagosome+ko04141//Protein processing in endoplasmic reticulum+ko03060//Protein export	BTB/POZ domain		hypothetical protein BU14_0066s0031 [Porphyra umbilicalis]
Unigene630_All	510	ko04141//Protein processing in endoplasmic reticulum	Genetic Information Processing	Folding, sorting and degradation	-1.48507	1.21312e-12	4.17659e-13	K14005//protein transport protein SEC31+ko04141//Protein processing in endoplasmic reticulum			formin-like protein 20 isoform X2 [Sesamum indicum]
Unigene1758_All	480	ko04141//Protein processing in endoplasmic reticulum	Genetic Information Processing	Folding, sorting and degradation	-1.51983	2.64896e-07	1.30582e-07	K02184//formin 2;K02184//formin 2;K14007//protein transport protein SEC24+ko04141//Protein processing in endoplasmic reticulum		AC232887.1 Oryza officinalis clone OO__Ba0042E14, complete sequence	hypothetical protein BU14_0452s0013 [Porphyra umbilicalis]	[A] KOG4849 mRNA cleavage factor I subunit/CPSF subunit	Protein argonaute 18 OS=Oryza sativa subsp. japonica GN=AGO18 PE=2 SV=1
Unigene10601_All	3798	ko00565//Ether lipid metabolism;ko00564//Glycerophospholipid metabolism;ko01100//Metabolic pathways;ko00440//Phosphonate and phosphinate metabolism;ko04141//Protein processing in endoplasmic reticulum;ko01110//Biosynthesis of secondary metabolites	Genetic Information Processing;Metabolism	Lipid metabolism;Global and overview maps;Folding, sorting and degradation;Metabolism of other amino acids	-1.52674	1.22754e-55	1.53491e-56	K14018//phospholipase A-2-activating protein+ko04141//Protein processing in endoplasmic reticulum;K14018//phospholipase A-2-activating protein+ko04141//Protein processing in endoplasmic reticulum;K00993//ethanolaminephosphotransferase [EC:2.7.8.1]+ko00440//Phosphonate and phosphinate metabolism+ko01100//Metabolic pathways+ko01110//Biosynthesis of secondary metabolites+ko00564//Glycerophospholipid…	Lysine methyltransferase		predicted protein [Thalassiosira pseudonana CCMP1335] >EED90256.1 predicted protein [Thalassiosira pseudonana CCMP1335]	[I] KOG0301 Phospholipase A2-activating protein (contains WD40 repeats)	Elongator complex protein 2 OS=Arabidopsis thaliana GN=ELP2 PE=1 SV=1
Unigene23454_All	932	ko04141//Protein processing in endoplasmic reticulum;ko04120//Ubiquitin mediated proteolysis;ko03420//Nucleotide excision repair	Genetic Information Processing	Folding, sorting and degradation;Replication and repair	-1.54647	2.03829e-25	4.39711e-26	K03868//RING-box protein 1 [EC:2.3.2.32]+ko04141//Protein processing in endoplasmic reticulum+ko03420//Nucleotide excision repair+ko04120//Ubiquitin mediated proteolysis;K03868//RING-box protein 1 [EC:2.3.2.32]+ko04141//Protein processing in endoplasmic reticulum+ko03420//Nucleotide excision repair+ko04120//Ubiquitin mediated proteolysis;K03868//RING-box protein 1 [EC:2.3.2.32]+ko04141//Protein p…	RING-H2 zinc finger domain		RING-box protein 1 [Fistulifera solaris]	[O] KOG2930 SCF ubiquitin ligase, Rbx1 component	RING-box protein 1b OS=Arabidopsis thaliana GN=RBX1B PE=2 SV=1
Unigene29270_All	671	ko04141//Protein processing in endoplasmic reticulum;ko03060//Protein export;ko04145//Phagosome	Genetic Information Processing;Cellular Processes	Folding, sorting and degradation;Transport and catabolism	-1.55836	7.48662e-13	2.55208e-13	K10956//protein transport protein SEC61 subunit alpha+ko04145//Phagosome+ko04141//Protein processing in endoplasmic reticulum+ko03060//Protein export	NAD(P)-binding Rossmann-like domain		hypothetical protein Ctob_010083 [Chrysochromulina sp. CCMP291]			GO:0071949//FAD binding
Unigene1813_All	632	ko04141//Protein processing in endoplasmic reticulum;ko04145//Phagosome;ko03040//Spliceosome;ko03060//Protein export	Genetic Information Processing;Cellular Processes	Folding, sorting and degradation;Transport and catabolism;Transcription	-1.57497	4.07937e-06	2.25864e-06	K22020//mucin-19;K19720//collagen, type III, alpha+ko04933//AGE-RAGE signaling pathway in diabetic complications;K10956//protein transport protein SEC61 subunit alpha+ko04145//Phagosome+ko04141//Protein processing in endoplasmic reticulum+ko03060//Protein export;K11086//small nuclear ribonucleoprotein B and B'+ko03040//Spliceosome;K11086//small nuclear ribonucleoprotein B and B'+ko03040//Spliceos…	Rhodanese-like domain		hypothetical protein FisN_1Hh327 [Fistulifera solaris]	[W] KOG3544 Collagens (type IV and type XIII), and related proteins
Unigene25388_All	454	ko03018//RNA degradation;ko03013//RNA transport;ko03015//mRNA surveillance pathway;ko04141//Protein processing in endoplasmic reticulum	Genetic Information Processing	Translation;Folding, sorting and degradation	-1.57873	0.000619357	0.000459984	K02184//formin 2;K06269//serine/threonine-protein phosphatase PP1 catalytic subunit [EC:3.1.3.16]+ko03015//mRNA surveillance pathway;K14007//protein transport protein SEC24+ko04141//Protein processing in endoplasmic reticulum;K02184//formin 2;K13126//polyadenylate-binding protein+ko03015//mRNA surveillance pathway+ko03018//RNA degradation+ko03013//RNA transport	Armadillo/beta-catenin-like repeat		Armadillo-like helical [Nannochloropsis gaditana]	[U] KOG0166 Karyopherin (importin) alpha	Importin subunit alpha-1 OS=Arabidopsis thaliana GN=IMPA1 PE=1 SV=2
CL5604.Contig1_All	2701	ko04141//Protein processing in endoplasmic reticulum	Genetic Information Processing	Folding, sorting and degradation	-1.61825	6.97553e-48	9.6663e-49	K02184//formin 2;K02184//formin 2;K14007//protein transport protein SEC24+ko04141//Protein processing in endoplasmic reticulum;K04733//interleukin-1 receptor-associated kinase 4 [EC:2.7.11.1]	Plasmid pRiA4b ORF-3-like protein		PREDICTED: basic proline-rich protein-like isoform X1 [Solanum pennellii]	[T] KOG1187 Serine/threonine protein kinase	Chitin-binding lectin 1 OS=Solanum tuberosum PE=1 SV=2
CL4716.Contig1_All	1935	ko04141//Protein processing in endoplasmic reticulum;ko03060//Protein export;ko04145//Phagosome	Cellular Processes;Genetic Information Processing	Folding, sorting and degradation;Transport and catabolism	-1.63077	1.09501e-13	3.58584e-14	K07342//protein transport protein SEC61 subunit gamma and related proteins+ko04145//Phagosome+ko04141//Protein processing in endoplasmic reticulum+ko03060//Protein export;K07342//protein transport protein SEC61 subunit gamma and related proteins+ko04145//Phagosome+ko04141//Protein processing in endoplasmic reticulum+ko03060//Protein export;K07342//protein transport protein SEC61 subunit gamma and…	Transmembrane amino acid transporter protein	HG975521.1 Solanum lycopersicum chromosome ch09, complete genome	hypothetical protein THAOC_28252 [Thalassiosira oceanica]	[U] KOG3498 Preprotein translocase, gamma subunit	Protein transport protein Sec61 subunit gamma-1 OS=Arabidopsis thaliana GN=SEC61G1 PE=1 SV=1	GO:0016021//integral component of membrane
Unigene2213_All	411	ko04141//Protein processing in endoplasmic reticulum	Genetic Information Processing	Folding, sorting and degradation	-1.64738	1.79085e-05	1.06841e-05	K02184//formin 2;K14007//protein transport protein SEC24+ko04141//Protein processing in endoplasmic reticulum			hornerin-like, partial [Zea mays]	[W] KOG3544 Collagens (type IV and type XIII), and related proteins	Formin-like protein 5 OS=Oryza sativa subsp. japonica GN=FH5 PE=2 SV=2	GO:0005509//calcium ion binding
Unigene18624_All	716	ko04141//Protein processing in endoplasmic reticulum	Genetic Information Processing	Folding, sorting and degradation	-1.6589	2.64329e-07	1.30286e-07	K13116//ATP-dependent RNA helicase DDX41 [EC:3.6.4.13];K16196//eukaryotic translation initiation factor 2-alpha kinase 4 [EC:2.7.11.1]+ko04141//Protein processing in endoplasmic reticulum;K16196//eukaryotic translation initiation factor 2-alpha kinase 4 [EC:2.7.11.1]+ko04141//Protein processing in endoplasmic reticulum;K16196//eukaryotic translation initiation factor 2-alpha kinase 4 [EC:2.7.11.1…	Protein kinase domain		PEK/GCN2 protein kinase [Phytophthora parasitica P1569]	[J] KOG1035 eIF-2alpha kinase GCN2	CDPK-related protein kinase OS=Daucus carota GN=CRK PE=2 SV=1
Unigene26369_All	718	ko00940//Phenylpropanoid biosynthesis;ko00040//Pentose and glucuronate interconversions;ko03020//RNA polymerase;ko01110//Biosynthesis of secondary metabolites;ko04141//Protein processing in endoplasmic reticulum;ko01100//Metabolic pathways	Metabolism;Genetic Information Processing	Folding, sorting and degradation;Biosynthesis of other secondary metabolites;Global and overview maps;Carbohydrate metabolism;Transcription	-1.67382	5.86409e-08	2.73293e-08	K01051//pectinesterase [EC:3.1.1.11]+ko00040//Pentose and glucuronate interconversions+ko01100//Metabolic pathways;K03006//DNA-directed RNA polymerase II subunit RPB1 [EC:2.7.7.6]+ko03020//RNA polymerase;K00430//peroxidase [EC:1.11.1.7]+ko01100//Metabolic pathways+ko01110//Biosynthesis of secondary metabolites+ko00940//Phenylpropanoid biosynthesis;K14007//protein transport protein SEC24+ko04141//…			hypothetical protein Esi_0009_0176 [Ectocarpus siliculosus]	[W] KOG3544 Collagens (type IV and type XIII), and related proteins	Oleosin-B6 OS=Brassica napus GN=OlnB6 PE=1 SV=3
CL1744.Contig5_All	2797	ko00940//Phenylpropanoid biosynthesis;ko01100//Metabolic pathways;ko01110//Biosynthesis of secondary metabolites;ko04141//Protein processing in endoplasmic reticulum;ko03420//Nucleotide excision repair	Metabolism;Genetic Information Processing	Global and overview maps;Folding, sorting and degradation;Biosynthesis of other secondary metabolites;Replication and repair	-1.71281	5.36142e-38	8.7753e-39	K10839//UV excision repair protein RAD23+ko04141//Protein processing in endoplasmic reticulum+ko03420//Nucleotide excision repair;K00430//peroxidase [EC:1.11.1.7]+ko01100//Metabolic pathways+ko01110//Biosynthesis of secondary metabolites+ko00940//Phenylpropanoid biosynthesis			hypothetical protein GUITHDRAFT_119564 [Guillardia theta CCMP2712] >EKX34274.1 hypothetical protein GUITHDRAFT_119564 [Guillardia theta CCMP2712]	[J] KOG2975 Translation initiation factor 3, subunit f (eIF-3f)	Lysine-rich arabinogalactan protein 19 OS=Arabidopsis thaliana GN=AGP19 PE=2 SV=2
CL9140.Contig2_All	4269	ko04141//Protein processing in endoplasmic reticulum	Genetic Information Processing	Folding, sorting and degradation	-1.72609	1.24443e-110	9.41824e-112	K10085//ER degradation enhancer, mannosidase alpha-like 2+ko04141//Protein processing in endoplasmic reticulum;K10085//ER degradation enhancer, mannosidase alpha-like 2+ko04141//Protein processing in endoplasmic reticulum	Glycosyl hydrolase family 47	XM_013042808.1 Blastocystis hominis mRNA	hypothetical protein AURANDRAFT_30199, partial [Aureococcus anophagefferens] >EGB05810.1 hypothetical protein AURANDRAFT_30199, partial [Aureococcus anophagefferens]	[G] KOG2429 Glycosyl hydrolase, family 47	Alpha-mannosidase I MNS4 OS=Arabidopsis thaliana GN=MNS4 PE=1 SV=1	GO:0016020//membrane;GO:0008152//metabolic process;GO:0004571//mannosyl-oligosaccharide 1,2-alpha-mannosidase activity;GO:0005509//calcium ion binding
CL1296.Contig5_All	1366	ko04141//Protein processing in endoplasmic reticulum;ko04120//Ubiquitin mediated proteolysis	Genetic Information Processing	Folding, sorting and degradation	-1.73216	1.28474e-45	1.84492e-46	K03094//S-phase kinase-associated protein 1+ko04141//Protein processing in endoplasmic reticulum+ko04120//Ubiquitin mediated proteolysis;K03094//S-phase kinase-associated protein 1+ko04141//Protein processing in endoplasmic reticulum+ko04120//Ubiquitin mediated proteolysis;K03094//S-phase kinase-associated protein 1+ko04141//Protein processing in endoplasmic reticulum+ko04120//Ubiquitin mediated …	Skp1 family, tetramerisation domain		hypothetical protein AURANDRAFT_58667 [Aureococcus anophagefferens] >EGB12114.1 hypothetical protein AURANDRAFT_58667 [Aureococcus anophagefferens]	[O] KOG1724 SCF ubiquitin ligase, Skp1 component	SKP1-like protein 11 OS=Arabidopsis thaliana GN=ASK11 PE=1 SV=1	GO:0006511//ubiquitin-dependent protein catabolic process;GO:0016301//kinase activity
Unigene44982_All	843	ko04141//Protein processing in endoplasmic reticulum	Genetic Information Processing	Folding, sorting and degradation	-1.73632	1.80396e-22	4.2254e-23	K14026//SEL1 protein+ko04141//Protein processing in endoplasmic reticulum;K14026//SEL1 protein+ko04141//Protein processing in endoplasmic reticulum;K14026//SEL1 protein+ko04141//Protein processing in endoplasmic reticulum	Sel1 repeat		conserved unknown protein [Ectocarpus siliculosus]	[MOT] KOG1550 Extracellular protein SEL-1 and related proteins	F-box protein At1g70590 OS=Arabidopsis thaliana GN=At1g70590 PE=2 SV=1
CL2101.Contig1_All	2293	ko03060//Protein export;ko03013//RNA transport;ko04145//Phagosome;ko00940//Phenylpropanoid biosynthesis;ko03015//mRNA surveillance pathway;ko01100//Metabolic pathways;ko04141//Protein processing in endoplasmic reticulum;ko01110//Biosynthesis of secondary metabolites	Metabolism;Genetic Information Processing;Cellular Processes	Translation;Folding, sorting and degradation;Biosynthesis of other secondary metabolites;Global and overview maps;Transport and catabolism	-1.74006	2.86986e-51	3.787e-52	K10956//protein transport protein SEC61 subunit alpha+ko04145//Phagosome+ko04141//Protein processing in endoplasmic reticulum+ko03060//Protein export;K00430//peroxidase [EC:1.11.1.7]+ko01100//Metabolic pathways+ko01110//Biosynthesis of secondary metabolites+ko00940//Phenylpropanoid biosynthesis;K13171//serine/arginine repetitive matrix protein 1+ko03015//mRNA surveillance pathway+ko03013//RNA tra…	WD40-like Beta Propeller Repeat		basic proline-rich protein-like [Helianthus annuus] >OTG10782.1 putative root cap [Helianthus annuus]	[M] LSE0601 A Pollen extensin-like protein (Pex)	Proline-rich receptor-like protein kinase PERK2 OS=Arabidopsis thaliana GN=PERK2 PE=2 SV=3	GO:0004252//serine-type endopeptidase activity;GO:0016539//intein-mediated protein splicing;GO:0008233//peptidase activity;GO:0016021//integral component of membrane
Unigene20005_All	378	ko03420//Nucleotide excision repair;ko00910//Nitrogen metabolism;ko04141//Protein processing in endoplasmic reticulum	Metabolism;Genetic Information Processing	Folding, sorting and degradation;Replication and repair;Energy metabolism	-1.7449	0.000198521	0.00013606	K10839//UV excision repair protein RAD23+ko04141//Protein processing in endoplasmic reticulum+ko03420//Nucleotide excision repair;K10839//UV excision repair protein RAD23+ko04141//Protein processing in endoplasmic reticulum+ko03420//Nucleotide excision repair;K10839//UV excision repair protein RAD23+ko04141//Protein processing in endoplasmic reticulum+ko03420//Nucleotide excision repair;K01674//c…	Adenoviral DNA terminal protein	XM_010443201.2 PREDICTED: Camelina sativa coiled-coil domain-containing protein 97-like (LOC104724659), mRNA	hypothetical protein [Tarenaya spinosa]	[R] TWOG0094 Lectins containing Jacalin domain	Myrosinase-binding protein 2 OS=Arabidopsis thaliana GN=F-ATMBP PE=2 SV=1
CL3.Contig60_All	3407	ko01230//Biosynthesis of amino acids;ko00260//Glycine, serine and threonine metabolism;ko04141//Protein processing in endoplasmic reticulum;ko00400//Phenylalanine, tyrosine and tryptophan biosynthesis;ko01100//Metabolic pathways;ko01110//Biosynthesis of secondary metabolites	Genetic Information Processing;Metabolism	Folding, sorting and degradation;Amino acid metabolism;Global and overview maps	-1.82379	1.16565e-64	1.30349e-65	K14007//protein transport protein SEC24+ko04141//Protein processing in endoplasmic reticulum;K14007//protein transport protein SEC24+ko04141//Protein processing in endoplasmic reticulum;K01695//tryptophan synthase alpha chain [EC:4.2.1.20]+ko01230//Biosynthesis of amino acids+ko01100//Metabolic pathways+ko01110//Biosynthesis of secondary metabolites+ko00260//Glycine, serine and threonine metaboli…	Ankyrin repeats (many copies)		hypothetical protein PHMEG_00015685 [Phytophthora megakarya]	[R] KOG0504 FOG: Ankyrin repeat
CL1744.Contig20_All	2148	ko04141//Protein processing in endoplasmic reticulum;ko03420//Nucleotide excision repair;ko00940//Phenylpropanoid biosynthesis;ko01110//Biosynthesis of secondary metabolites;ko01100//Metabolic pathways	Metabolism;Genetic Information Processing	Replication and repair;Global and overview maps;Biosynthesis of other secondary metabolites;Folding, sorting and degradation	-1.82426	2.35639e-09	9.89179e-10	K00430//peroxidase [EC:1.11.1.7]+ko01100//Metabolic pathways+ko01110//Biosynthesis of secondary metabolites+ko00940//Phenylpropanoid biosynthesis;K10839//UV excision repair protein RAD23+ko04141//Protein processing in endoplasmic reticulum+ko03420//Nucleotide excision repair;K00430//peroxidase [EC:1.11.1.7]+ko01100//Metabolic pathways+ko01110//Biosynthesis of secondary metabolites+ko00940//Phenyl…	Wnt and FGF inhibitory regulator		hypothetical protein GUITHDRAFT_119564 [Guillardia theta CCMP2712] >EKX34274.1 hypothetical protein GUITHDRAFT_119564 [Guillardia theta CCMP2712]	[T] KOG4743 Cyclin-dependent kinase inhibitor	Oleosin-B6 OS=Brassica napus GN=OlnB6 PE=1 SV=3
Unigene20025_All	288	ko04144//Endocytosis;ko04141//Protein processing in endoplasmic reticulum	Cellular Processes;Genetic Information Processing	Transport and catabolism;Folding, sorting and degradation	-1.82795	3.96194e-06	2.19115e-06	K02184//formin 2;K02184//formin 2;K14007//protein transport protein SEC24+ko04141//Protein processing in endoplasmic reticulum;K05747//Wiskott-Aldrich syndrome protein+ko04144//Endocytosis			Os04g0100300 [Oryza sativa Japonica Group]	[K] KOG2341 TATA box binding protein (TBP)-associated factor, RNA polymerase II	Formin-like protein 18 OS=Oryza sativa subsp. japonica GN=FH18 PE=2 SV=1
Unigene716_All	902	ko04120//Ubiquitin mediated proteolysis;ko04141//Protein processing in endoplasmic reticulum	Genetic Information Processing	Folding, sorting and degradation	-1.83765	1.62571e-08	7.256e-09	K03094//S-phase kinase-associated protein 1+ko04141//Protein processing in endoplasmic reticulum+ko04120//Ubiquitin mediated proteolysis;K03094//S-phase kinase-associated protein 1+ko04141//Protein processing in endoplasmic reticulum+ko04120//Ubiquitin mediated proteolysis;K03094//S-phase kinase-associated protein 1+ko04141//Protein processing in endoplasmic reticulum+ko04120//Ubiquitin mediated …		CP023114.1 Lupinus angustiflorus cultivar Tanjil chromosome LG-02	conserved unknown protein [Ectocarpus siliculosus]	[O] KOG1724 SCF ubiquitin ligase, Skp1 component	SKP1-like protein 11 OS=Arabidopsis thaliana GN=ASK11 PE=1 SV=1	GO:0006511//ubiquitin-dependent protein catabolic process
CL2641.Contig5_All	1471	ko00940//Phenylpropanoid biosynthesis;ko01110//Biosynthesis of secondary metabolites;ko01100//Metabolic pathways;ko04141//Protein processing in endoplasmic reticulum;ko03060//Protein export;ko04145//Phagosome	Genetic Information Processing;Cellular Processes;Metabolism	Transport and catabolism;Folding, sorting and degradation;Global and overview maps;Biosynthesis of other secondary metabolites	-1.85644	8.01971e-68	8.65996e-69	K16628//collagen, type VII, alpha;K22020//mucin-19;K10956//protein transport protein SEC61 subunit alpha+ko04145//Phagosome+ko04141//Protein processing in endoplasmic reticulum+ko03060//Protein export;K00430//peroxidase [EC:1.11.1.7]+ko01100//Metabolic pathways+ko01110//Biosynthesis of secondary metabolites+ko00940//Phenylpropanoid biosynthesis	Vacuolar sorting protein 9 (VPS9) domain		hypothetical protein SPRG_14675 [Saprolegnia parasitica CBS 223.65] >KDO19813.1 hypothetical protein SPRG_14675 [Saprolegnia parasitica CBS 223.65]	[K] KOG2341 TATA box binding protein (TBP)-associated factor, RNA polymerase II	Oleosin-B6 OS=Brassica napus GN=OlnB6 PE=1 SV=3
Unigene22976_All	514	ko04141//Protein processing in endoplasmic reticulum	Genetic Information Processing	Folding, sorting and degradation	-1.87159	2.76338e-12	9.70174e-13	K10656//E3 ubiquitin-protein ligase MARCH1/8 [EC:2.3.2.27];K10661//E3 ubiquitin-protein ligase MARCH6 [EC:2.3.2.27]+ko04141//Protein processing in endoplasmic reticulum;K10661//E3 ubiquitin-protein ligase MARCH6 [EC:2.3.2.27]+ko04141//Protein processing in endoplasmic reticulum;K10661//E3 ubiquitin-protein ligase MARCH6 [EC:2.3.2.27]+ko04141//Protein processing in endoplasmic reticulum	RING-variant domain	CP018166.1 Oryza sativa Indica Group cultivar Shuhui498 chromosome 10 sequence	hypothetical protein Ctob_000934, partial [Chrysochromulina sp. CCMP291]	[A] KOG1609 Protein involved in mRNA turnover and stability		GO:0008270//zinc ion binding;GO:0016021//integral component of membrane
Unigene33063_All	1291	ko04141//Protein processing in endoplasmic reticulum;ko03420//Nucleotide excision repair;ko03015//mRNA surveillance pathway;ko03013//RNA transport	Genetic Information Processing	Translation;Replication and repair;Folding, sorting and degradation	-1.88543	1.86662e-05	1.11527e-05	K14325//RNA-binding protein with serine-rich domain 1+ko03015//mRNA surveillance pathway+ko03013//RNA transport;K02184//formin 2;K22020//mucin-19;K10839//UV excision repair protein RAD23+ko04141//Protein processing in endoplasmic reticulum+ko03420//Nucleotide excision repair	XPC-binding domain		hypothetical protein BU14_0153s0036 [Porphyra umbilicalis]	[L] KOG0011 Nucleotide excision repair factor NEF2, RAD23 component	Vegetative cell wall protein gp1 OS=Chlamydomonas reinhardtii GN=GP1 PE=1 SV=1
Unigene85373_All	3310	ko03060//Protein export;ko04145//Phagosome;ko04141//Protein processing in endoplasmic reticulum	Genetic Information Processing;Cellular Processes	Transport and catabolism;Folding, sorting and degradation	-1.90196	8.95125e-35	1.56583e-35	K10956//protein transport protein SEC61 subunit alpha+ko04145//Phagosome+ko04141//Protein processing in endoplasmic reticulum+ko03060//Protein export;K22020//mucin-19;K19719//collagen, type II, alpha;K16628//collagen, type VII, alpha;K04733//interleukin-1 receptor-associated kinase 4 [EC:2.7.11.1]	Peptidase family C69		conserved unknown protein [Ectocarpus siliculosus]	[T] KOG1187 Serine/threonine protein kinase	Proline-rich receptor-like protein kinase PERK1 OS=Arabidopsis thaliana GN=PERK1 PE=2 SV=1	GO:0016021//integral component of membrane;GO:0016805//dipeptidase activity
CL388.Contig2_All	2600	ko04141//Protein processing in endoplasmic reticulum	Genetic Information Processing	Folding, sorting and degradation	-1.90519	0	0	K14007//protein transport protein SEC24+ko04141//Protein processing in endoplasmic reticulum;K14007//protein transport protein SEC24+ko04141//Protein processing in endoplasmic reticulum;K04733//interleukin-1 receptor-associated kinase 4 [EC:2.7.11.1];K19984//exocyst complex component 5;K02184//formin 2	SPFH domain / Band 7 family		putative band 7 family protein [Symbiodinium microadriaticum]	[K] KOG2341 TATA box binding protein (TBP)-associated factor, RNA polymerase II	Classical arabinogalactan protein 9 OS=Arabidopsis thaliana GN=AGP9 PE=1 SV=2	GO:0005199//structural constituent of cell wall;GO:0004674//protein serine/threonine kinase activity;GO:0005524//ATP binding;GO:0016021//integral component of membrane
Unigene10561_All	1095	ko03013//RNA transport;ko03040//Spliceosome;ko03420//Nucleotide excision repair;ko04141//Protein processing in endoplasmic reticulum;ko03015//mRNA surveillance pathway	Genetic Information Processing	Translation;Transcription;Folding, sorting and degradation;Replication and repair	-1.96546	3.70348e-07	1.84926e-07	K12875//apoptotic chromatin condensation inducer in the nucleus+ko03040//Spliceosome+ko03015//mRNA surveillance pathway+ko03013//RNA transport;K03327//multidrug resistance protein, MATE family;K10839//UV excision repair protein RAD23+ko04141//Protein processing in endoplasmic reticulum+ko03420//Nucleotide excision repair;K10839//UV excision repair protein RAD23+ko04141//Protein processing in endo…	FG-GAP repeat		hypothetical protein THRCLA_04351, partial [Thraustotheca clavata]	[BK] KOG1472 Histone acetyltransferase SAGA/ADA, catalytic subunit PCAF/GCN5 and related proteins	Myrosinase-binding protein 2 OS=Arabidopsis thaliana GN=MBP2 PE=2 SV=1	GO:0004252//serine-type endopeptidase activity;GO:0006508//proteolysis;GO:0016021//integral component of membrane;GO:0005576//extracellular region
Unigene39011_All	361	ko04141//Protein processing in endoplasmic reticulum;ko03420//Nucleotide excision repair	Genetic Information Processing	Folding, sorting and degradation;Replication and repair	-2.00639	1.15258e-06	6.03102e-07	K02184//formin 2;K10839//UV excision repair protein RAD23+ko04141//Protein processing in endoplasmic reticulum+ko03420//Nucleotide excision repair;K02184//formin 2;K02184//formin 2	WD domain, G-beta repeat		hypothetical protein SELMODRAFT_415476 [Selaginella moellendorffii] >EFJ23623.1 hypothetical protein SELMODRAFT_415476 [Selaginella moellendorffii]	[S] KOG4805 Uncharacterized conserved protein	Vegetative cell wall protein gp1 OS=Chlamydomonas reinhardtii GN=GP1 PE=1 SV=1
Unigene39197_All	1472	ko04141//Protein processing in endoplasmic reticulum	Genetic Information Processing	Folding, sorting and degradation	-2.02366	7.68878e-98	6.37271e-99	K09584//protein disulfide-isomerase A6 [EC:5.3.4.1]+ko04141//Protein processing in endoplasmic reticulum;K09584//protein disulfide-isomerase A6 [EC:5.3.4.1]+ko04141//Protein processing in endoplasmic reticulum;K09584//protein disulfide-isomerase A6 [EC:5.3.4.1]+ko04141//Protein processing in endoplasmic reticulum;K09584//protein disulfide-isomerase A6 [EC:5.3.4.1]+ko04141//Protein processing in e…	Thioredoxin	XM_009037157.1 Aureococcus anophagefferens hypothetical protein partial mRNA	protein disulfide-isomerase domain [Phytophthora parasitica P10297]	[O] KOG0190 Protein disulfide isomerase (prolyl 4-hydroxylase beta subunit)	Protein disulfide-isomerase 2-3 OS=Arabidopsis thaliana GN=PDIL2-3 PE=2 SV=1	GO:0006457//protein folding;GO:0005783//endoplasmic reticulum;GO:0016853//isomerase activity;GO:0034976//response to endoplasmic reticulum stress;GO:0003756//protein disulfide isomerase activity;GO:0045454//cell redox homeostasis
CL11055.Contig2_All	4330	ko04141//Protein processing in endoplasmic reticulum	Genetic Information Processing	Folding, sorting and degradation	-2.0643	2.40904e-90	2.11297e-91	K09584//protein disulfide-isomerase A6 [EC:5.3.4.1]+ko04141//Protein processing in endoplasmic reticulum;K03671//thioredoxin 1;K03671//thioredoxin 1;K09584//protein disulfide-isomerase A6 [EC:5.3.4.1]+ko04141//Protein processing in endoplasmic reticulum;K03671//thioredoxin 1	Thioredoxin	CP023129.1 Lupinus angustiflorus cultivar Tanjil chromosome LG-17	hypothetical protein BU14_0125s0002 [Porphyra umbilicalis]	[O] KOG0910 Thioredoxin-like protein	Protein disulfide isomerase-like 2-3 OS=Oryza sativa subsp. japonica GN=PDIL2-3 PE=2 SV=1
Unigene37474_All	1880	ko04141//Protein processing in endoplasmic reticulum;ko04626//Plant-pathogen interaction	Organismal Systems;Genetic Information Processing	Folding, sorting and degradation;Environmental adaptation	-2.09196	3.15297e-21	7.67877e-22	K04079//molecular chaperone HtpG+ko04141//Protein processing in endoplasmic reticulum+ko04626//Plant-pathogen interaction;K09487//heat shock protein 90kDa beta+ko04141//Protein processing in endoplasmic reticulum+ko04626//Plant-pathogen interaction;K04079//molecular chaperone HtpG+ko04141//Protein processing in endoplasmic reticulum+ko04626//Plant-pathogen interaction	Hsp90 protein		heat shock protein 90 (chromatophore) [Paulinella chromatophora] >ACB42618.1 heat shock protein 90 (chromatophore) [Paulinella chromatophora]	[O] KOG0020 Endoplasmic reticulum glucose-regulated protein (GRP94/endoplasmin), HSP90 family	Heat shock protein 83 OS=Ipomoea nil GN=HSP83A PE=2 SV=1	GO:0006457//protein folding;GO:0005524//ATP binding;GO:0051082//unfolded protein binding;GO:0006950//response to stress;GO:0009536//plastid
Unigene28916_All	4530	ko04141//Protein processing in endoplasmic reticulum	Genetic Information Processing	Folding, sorting and degradation	-2.13094	7.26326e-64	8.19079e-65	K14018//phospholipase A-2-activating protein+ko04141//Protein processing in endoplasmic reticulum;K14018//phospholipase A-2-activating protein+ko04141//Protein processing in endoplasmic reticulum;K19329//WW domain-containing oxidoreductase;K19329//WW domain-containing oxidoreductase	short chain dehydrogenase		short-chain alcohol dehydrogenase-like protein [Ectocarpus siliculosus]	[I] KOG0301 Phospholipase A2-activating protein (contains WD40 repeats)	Salutaridine reductase OS=Papaver bracteatum GN=SALR PE=1 SV=1
Unigene29445_All	799	ko04141//Protein processing in endoplasmic reticulum	Genetic Information Processing	Folding, sorting and degradation	-2.14988	8.86888e-06	5.0892e-06	K02184//formin 2;K02184//formin 2;K02184//formin 2;K14007//protein transport protein SEC24+ko04141//Protein processing in endoplasmic reticulum;K14007//protein transport protein SEC24+ko04141//Protein processing in endoplasmic reticulum	Bacterial NAD-glutamate dehydrogenase		glutamate dehydrogenase [Fistulifera solaris]	[W] KOG3544 Collagens (type IV and type XIII), and related proteins	Extensin OS=Nicotiana tabacum GN=HRGPNT3 PE=2 SV=1
CL1497.Contig1_All	4003	ko03060//Protein export;ko04145//Phagosome;ko04141//Protein processing in endoplasmic reticulum	Cellular Processes;Genetic Information Processing	Transport and catabolism;Folding, sorting and degradation	-2.16394	0	0	K22020//mucin-19;K16628//collagen, type VII, alpha;K10956//protein transport protein SEC61 subunit alpha+ko04145//Phagosome+ko04141//Protein processing in endoplasmic reticulum+ko03060//Protein export			hypothetical protein AK812_SmicGene30670 [Symbiodinium microadriaticum]	[GO] KOG4157 beta-1,6-N-acetylglucosaminyltransferase, contains WSC domain	Vegetative cell wall protein gp1 OS=Chlamydomonas reinhardtii GN=GP1 PE=1 SV=1
Unigene8328_All	2669	ko04141//Protein processing in endoplasmic reticulum	Genetic Information Processing	Folding, sorting and degradation	-2.18244	0.000399005	0.000286988	K09580//protein disulfide-isomerase A1 [EC:5.3.4.1]+ko04141//Protein processing in endoplasmic reticulum;K09580//protein disulfide-isomerase A1 [EC:5.3.4.1]+ko04141//Protein processing in endoplasmic reticulum;K02184//formin 2;K09580//protein disulfide-isomerase A1 [EC:5.3.4.1]+ko04141//Protein processing in endoplasmic reticulum	Thioredoxin-like domain		formin-like protein 18 [Aegilops tauschii subsp. tauschii]	[O] KOG0191 Thioredoxin/protein disulfide isomerase	Formin-like protein 16 OS=Oryza sativa subsp. japonica GN=FH16 PE=2 SV=1	GO:0005623//cell;GO:0045454//cell redox homeostasis
Unigene34521_All	2092	ko04141//Protein processing in endoplasmic reticulum;ko04120//Ubiquitin mediated proteolysis	Genetic Information Processing	Folding, sorting and degradation	-2.20708	0	0	K06689//ubiquitin-conjugating enzyme E2 D [EC:2.3.2.23]+ko04141//Protein processing in endoplasmic reticulum+ko04120//Ubiquitin mediated proteolysis;K06689//ubiquitin-conjugating enzyme E2 D [EC:2.3.2.23]+ko04141//Protein processing in endoplasmic reticulum+ko04120//Ubiquitin mediated proteolysis;K06689//ubiquitin-conjugating enzyme E2 D [EC:2.3.2.23]+ko04141//Protein processing in endoplasmic re…	Ubiquitin-conjugating enzyme		ubiquitin-conjugating enzyme e2-16kda, ubiquitin protein ligase [Thalassiosira pseudonana CCMP1335] >EED93493.1 ubiquitin-conjugating enzyme e2-16kda, ubiquitin protein ligase [Thalassiosira pseudonana CCMP1335]	[O] KOG0417 Ubiquitin-protein ligase	Ubiquitin-conjugating enzyme E2-17 kDa OS=Solanum lycopersicum PE=2 SV=1	GO:0005524//ATP binding;GO:0016874//ligase activity
Unigene40429_All	676	ko04120//Ubiquitin mediated proteolysis;ko04141//Protein processing in endoplasmic reticulum	Genetic Information Processing	Folding, sorting and degradation	-2.22692	3.38449e-05	2.08411e-05	K03094//S-phase kinase-associated protein 1+ko04141//Protein processing in endoplasmic reticulum+ko04120//Ubiquitin mediated proteolysis;K03094//S-phase kinase-associated protein 1+ko04141//Protein processing in endoplasmic reticulum+ko04120//Ubiquitin mediated proteolysis;K03094//S-phase kinase-associated protein 1+ko04141//Protein processing in endoplasmic reticulum+ko04120//Ubiquitin mediated …	Skp1 family, tetramerisation domain		S-phase kinase-associated protein 1A [Achlya hypogyna]	[O] KOG1724 SCF ubiquitin ligase, Skp1 component	SKP1-like protein 4 OS=Arabidopsis thaliana GN=ASK4 PE=1 SV=1	GO:0006511//ubiquitin-dependent protein catabolic process
CL7631.Contig3_All	664	ko04141//Protein processing in endoplasmic reticulum	Genetic Information Processing	Folding, sorting and degradation	-2.2345	1.16447e-16	3.35635e-17	K09529//DnaJ homolog subfamily C member 9;K09510//DnaJ homolog subfamily B member 4;K09523//DnaJ homolog subfamily C member 3+ko04141//Protein processing in endoplasmic reticulum	DnaJ domain		DnaJ-domain-containing protein [Fragilariopsis cylindrus CCMP1102]	[O] KOG0713 Molecular chaperone (DnaJ superfamily)	Chaperone protein dnaJ 39 OS=Arabidopsis thaliana GN=ATJ39 PE=2 SV=2
Unigene6333_All	1979	ko04141//Protein processing in endoplasmic reticulum	Genetic Information Processing	Folding, sorting and degradation	-2.25434	1.34905e-10	5.23742e-11	K09584//protein disulfide-isomerase A6 [EC:5.3.4.1]+ko04141//Protein processing in endoplasmic reticulum;K09584//protein disulfide-isomerase A6 [EC:5.3.4.1]+ko04141//Protein processing in endoplasmic reticulum;K09584//protein disulfide-isomerase A6 [EC:5.3.4.1]+ko04141//Protein processing in endoplasmic reticulum;K09584//protein disulfide-isomerase A6 [EC:5.3.4.1]+ko04141//Protein processing in e…	Thioredoxin	XM_009037157.1 Aureococcus anophagefferens hypothetical protein partial mRNA	Protein disulfide-isomerase fusion protein [Ectocarpus siliculosus]	[O] KOG0190 Protein disulfide isomerase (prolyl 4-hydroxylase beta subunit)	Protein disulfide-isomerase 2-3 OS=Arabidopsis thaliana GN=PDIL2-3 PE=2 SV=1	GO:0006457//protein folding;GO:0005783//endoplasmic reticulum;GO:0016853//isomerase activity;GO:0034976//response to endoplasmic reticulum stress;GO:0003756//protein disulfide isomerase activity;GO:0045454//cell redox homeostasis
CL3120.Contig2_All	1357	ko01100//Metabolic pathways;ko04141//Protein processing in endoplasmic reticulum;ko00510//N-Glycan biosynthesis	Metabolism;Genetic Information Processing	Glycan biosynthesis and metabolism;Global and overview maps;Folding, sorting and degradation	-2.27687	2.58537e-11	9.59309e-12	K01230//mannosyl-oligosaccharide alpha-1,2-mannosidase [EC:3.2.1.113]+ko04141//Protein processing in endoplasmic reticulum+ko00510//N-Glycan biosynthesis+ko01100//Metabolic pathways;K01230//mannosyl-oligosaccharide alpha-1,2-mannosidase [EC:3.2.1.113]+ko04141//Protein processing in endoplasmic reticulum+ko00510//N-Glycan biosynthesis+ko01100//Metabolic pathways;K01230//mannosyl-oligosaccharide al…	Glycosyl hydrolase family 47		unnamed protein product [Coffea canephora]	[G] KOG2431 1, 2-alpha-mannosidase	Mannosyl-oligosaccharide 1,2-alpha-mannosidase MNS3 OS=Arabidopsis thaliana GN=MNS3 PE=1 SV=1	GO:0005783//endoplasmic reticulum;GO:0004571//mannosyl-oligosaccharide 1,2-alpha-mannosidase activity;GO:0005509//calcium ion binding;GO:0016021//integral component of membrane;GO:0006491//N-glycan processing;GO:0000139//Golgi membrane
Unigene33462_All	1426	ko03013//RNA transport;ko03015//mRNA surveillance pathway;ko04141//Protein processing in endoplasmic reticulum	Genetic Information Processing	Folding, sorting and degradation;Translation	-2.31053	2.22884e-40	3.48936e-41	K19984//exocyst complex component 5;K02184//formin 2;K13171//serine/arginine repetitive matrix protein 1+ko03015//mRNA surveillance pathway+ko03013//RNA transport;K14007//protein transport protein SEC24+ko04141//Protein processing in endoplasmic reticulum	alpha/beta hydrolase fold		conserved unknown protein [Ectocarpus siliculosus]	[PT] KOG0498 K+-channel ERG and related proteins, contain PAS/PAC sensor domain	Serine/arginine-rich splicing factor SR45 OS=Arabidopsis thaliana GN=SR45 PE=1 SV=1	GO:0016787//hydrolase activity
Unigene42785_All	427	ko04141//Protein processing in endoplasmic reticulum	Genetic Information Processing	Folding, sorting and degradation	-2.35633	1.34533e-11	4.90829e-12	K14007//protein transport protein SEC24+ko04141//Protein processing in endoplasmic reticulum;K02184//formin 2;K02184//formin 2;K02184//formin 2	Autophagy protein 16 (ATG16)		formin-like protein 5 isoform X1 [Aegilops tauschii subsp. tauschii] >XP_020146247.1 formin-like protein 5 isoform X1 [Aegilops tauschii subsp. tauschii]	[W] KOG3544 Collagens (type IV and type XIII), and related proteins	Alpha carbonic anhydrase 8 OS=Arabidopsis thaliana GN=ACA8 PE=3 SV=3
CL3441.Contig2_All	679	ko04141//Protein processing in endoplasmic reticulum	Genetic Information Processing	Folding, sorting and degradation	-2.36956	7.73907e-05	4.98551e-05	K14006//protein transport protein SEC23+ko04141//Protein processing in endoplasmic reticulum;K14006//protein transport protein SEC23+ko04141//Protein processing in endoplasmic reticulum;K14006//protein transport protein SEC23+ko04141//Protein processing in endoplasmic reticulum	Sec23/Sec24 zinc finger		hypothetical protein AURANDRAFT_19426 [Aureococcus anophagefferens] >EGB12798.1 hypothetical protein AURANDRAFT_19426 [Aureococcus anophagefferens]	[U] KOG1986 Vesicle coat complex COPII, subunit SEC23		GO:0006886//intracellular protein transport;GO:0030127//COPII vesicle coat;GO:0008270//zinc ion binding;GO:0006888//ER to Golgi vesicle-mediated transport
CL4894.Contig1_All	741	ko04141//Protein processing in endoplasmic reticulum	Genetic Information Processing	Folding, sorting and degradation	-2.39421	4.24896e-20	1.07496e-20	K13993//HSP20 family protein+ko04141//Protein processing in endoplasmic reticulum;K13993//HSP20 family protein+ko04141//Protein processing in endoplasmic reticulum;K13993//HSP20 family protein+ko04141//Protein processing in endoplasmic reticulum;K13993//HSP20 family protein+ko04141//Protein processing in endoplasmic reticulum;K13993//HSP20 family protein+ko04141//Protein processing in endoplasmic…	Hsp20/alpha crystallin family		unnamed protein product, partial [Vitis vinifera]	[O] KOG0710 Molecular chaperone (small heat-shock protein Hsp26/Hsp42)	17.3 kDa class II heat shock protein OS=Solanum peruvianum PE=2 SV=1
Unigene4_All	2169	ko04141//Protein processing in endoplasmic reticulum	Genetic Information Processing	Folding, sorting and degradation	-2.4416	5.50108e-105	4.3382e-106	K14007//protein transport protein SEC24+ko04141//Protein processing in endoplasmic reticulum	Protein of unknown function, DUF440		hypothetical protein PHYSODRAFT_362123 [Phytophthora sojae] >EGZ07959.1 hypothetical protein PHYSODRAFT_362123 [Phytophthora sojae]	[R] KOG1721 FOG: Zn-finger	Formin-like protein 5 OS=Oryza sativa subsp. japonica GN=FH5 PE=2 SV=2	GO:0000398//mRNA splicing, via spliceosome;GO:0005681//spliceosomal complex;GO:0005509//calcium ion binding
CL10698.Contig2_All	1209	ko03013//RNA transport;ko04141//Protein processing in endoplasmic reticulum	Genetic Information Processing	Folding, sorting and degradation;Translation	-2.44918	0.000997828	0.000769093	K03237//translation initiation factor 2 subunit 1+ko04141//Protein processing in endoplasmic reticulum+ko03013//RNA transport;K03237//translation initiation factor 2 subunit 1+ko04141//Protein processing in endoplasmic reticulum+ko03013//RNA transport;K03237//translation initiation factor 2 subunit 1+ko04141//Protein processing in endoplasmic reticulum+ko03013//RNA transport;K03237//translation i…	Eukaryotic translation initiation factor 2 alpha subunit		hypothetical protein AURANDRAFT_72304 [Aureococcus anophagefferens] >EGB05173.1 hypothetical protein AURANDRAFT_72304 [Aureococcus anophagefferens]	[J] KOG2916 Translation initiation factor 2, alpha subunit (eIF-2alpha)	Eukaryotic translation initiation factor 2 subunit alpha homolog OS=Arabidopsis thaliana GN=At2g40290 PE=1 SV=2	GO:0003743//translation initiation factor activity
CL906.Contig1_All	1606	ko04141//Protein processing in endoplasmic reticulum;ko03060//Protein export;ko04145//Phagosome	Genetic Information Processing;Cellular Processes	Transport and catabolism;Folding, sorting and degradation	-2.46744	2.9567e-06	1.61041e-06	K22020//mucin-19;K10956//protein transport protein SEC61 subunit alpha+ko04145//Phagosome+ko04141//Protein processing in endoplasmic reticulum+ko03060//Protein export	BTK motif		hypothetical protein BU14_0111s0061 [Porphyra umbilicalis]	[W] KOG3544 Collagens (type IV and type XIII), and related proteins
Unigene17553_All	1014	ko00510//N-Glycan biosynthesis;ko01100//Metabolic pathways;ko04141//Protein processing in endoplasmic reticulum	Genetic Information Processing;Metabolism	Folding, sorting and degradation;Glycan biosynthesis and metabolism;Global and overview maps	-2.61937	2.90245e-08	1.32074e-08	K05546//mannosyl-oligosaccharide alpha-1,3-glucosidase [EC:3.2.1.207]+ko04141//Protein processing in endoplasmic reticulum+ko00510//N-Glycan biosynthesis+ko01100//Metabolic pathways;K05546//mannosyl-oligosaccharide alpha-1,3-glucosidase [EC:3.2.1.207]+ko04141//Protein processing in endoplasmic reticulum+ko00510//N-Glycan biosynthesis+ko01100//Metabolic pathways;K05546//mannosyl-oligosaccharide al…	Domain of unknown function (DUF5110)		Glycoside hydrolase [Macleaya cordata]		Probable glucan 1,3-alpha-glucosidase OS=Oryza sativa subsp. japonica GN=Os03g0216600 PE=3 SV=1
Unigene39591_All	656	ko03015//mRNA surveillance pathway;ko04141//Protein processing in endoplasmic reticulum;ko03013//RNA transport;ko04145//Phagosome;ko03060//Protein export	Cellular Processes;Genetic Information Processing	Folding, sorting and degradation;Transport and catabolism;Translation	-2.61937	1.61764e-06	8.56931e-07	K10956//protein transport protein SEC61 subunit alpha+ko04145//Phagosome+ko04141//Protein processing in endoplasmic reticulum+ko03060//Protein export;K14325//RNA-binding protein with serine-rich domain 1+ko03015//mRNA surveillance pathway+ko03013//RNA transport	IPT/TIG domain		protocadherin Fat-like protein [Phytophthora infestans T30-4] >EEY56445.1 protocadherin Fat-like protein [Phytophthora infestans T30-4]	[A] KOG1869 Splicing coactivator SRm160/300, subunit SRm300		GO:0007156//homophilic cell adhesion via plasma membrane adhesion molecules;GO:0005509//calcium ion binding;GO:0016021//integral component of membrane
Unigene29985_All	792	ko04120//Ubiquitin mediated proteolysis;ko04141//Protein processing in endoplasmic reticulum	Genetic Information Processing	Folding, sorting and degradation	-2.69503	4.84064e-63	5.51138e-64	K03347//cullin 1+ko04141//Protein processing in endoplasmic reticulum+ko04120//Ubiquitin mediated proteolysis;K03347//cullin 1+ko04141//Protein processing in endoplasmic reticulum+ko04120//Ubiquitin mediated proteolysis;K03347//cullin 1+ko04141//Protein processing in endoplasmic reticulum+ko04120//Ubiquitin mediated proteolysis;K03347//cullin 1+ko04141//Protein processing in endoplasmic reticulum…	Cullin family		similar to Cullin-1 (CUL-1) isoform 1 [Ectocarpus siliculosus]	[D] KOG2166 Cullins	Cullin-2 OS=Arabidopsis thaliana GN=CUL2 PE=1 SV=1	GO:0006511//ubiquitin-dependent protein catabolic process;GO:0031625//ubiquitin protein ligase binding;GO:0031461//cullin-RING ubiquitin ligase complex
CL5604.Contig4_All	2549	ko04141//Protein processing in endoplasmic reticulum	Genetic Information Processing	Folding, sorting and degradation	-2.82932	5.75854e-272	2.15653e-273	K02184//formin 2;K02184//formin 2;K14007//protein transport protein SEC24+ko04141//Protein processing in endoplasmic reticulum;K04733//interleukin-1 receptor-associated kinase 4 [EC:2.7.11.1]	Plasmid pRiA4b ORF-3-like protein		PREDICTED: basic proline-rich protein-like isoform X2 [Solanum pennellii]	[S] KOG4805 Uncharacterized conserved protein	Chitin-binding lectin 1 OS=Solanum tuberosum PE=1 SV=2
CL5262.Contig1_All	2106	ko04141//Protein processing in endoplasmic reticulum;ko03040//Spliceosome;ko04144//Endocytosis	Genetic Information Processing;Cellular Processes	Transport and catabolism;Transcription;Folding, sorting and degradation	-2.83661	0	0	K03283//heat shock 70kDa protein 1/2/6/8+ko03040//Spliceosome+ko04144//Endocytosis+ko04141//Protein processing in endoplasmic reticulum;K03283//heat shock 70kDa protein 1/2/6/8+ko03040//Spliceosome+ko04144//Endocytosis+ko04141//Protein processing in endoplasmic reticulum;K03283//heat shock 70kDa protein 1/2/6/8+ko03040//Spliceosome+ko04144//Endocytosis+ko04141//Protein processing in endoplasmic r…	Hsp70 protein	LC269923.1 Heterosigma akashiwo chloroplast DNA, complete genome, isolate: HaFk01	dnaK chaperone protein (chloroplast) [Triparma laevis] >BAS19102.1 dnaK chaperone protein (chloroplast) [Triparma laevis]	[O] KOG0102 Molecular chaperones mortalin/PBP74/GRP75, HSP70 superfamily	Chaperone protein dnaK OS=Guillardia theta GN=dnaK PE=3 SV=2	GO:0006457//protein folding;GO:0005524//ATP binding;GO:0051082//unfolded protein binding;GO:0009536//plastid;GO:0009507//chloroplast
CL176.Contig6_All	1247	ko04141//Protein processing in endoplasmic reticulum	Genetic Information Processing	Folding, sorting and degradation	-2.84255	6.2238e-36	1.05949e-36	K14007//protein transport protein SEC24+ko04141//Protein processing in endoplasmic reticulum;K02184//formin 2	Ankyrin repeats (3 copies)		PREDICTED: early nodulin-like protein 1 [Brachypodium distachyon] >KQK17171.1 hypothetical protein BRADI_1g32840 [Brachypodium distachyon]	[R] LSE3568 H Complement-c1q tumor necrosis factor-related protein/Adipocyte-specific secretory protein, and related proteins
CL7828.Contig1_All	2719	ko04141//Protein processing in endoplasmic reticulum;ko03040//Spliceosome;ko04144//Endocytosis	Genetic Information Processing;Cellular Processes	Folding, sorting and degradation;Transcription;Transport and catabolism	-2.89299	0	0	K03283//heat shock 70kDa protein 1/2/6/8+ko03040//Spliceosome+ko04144//Endocytosis+ko04141//Protein processing in endoplasmic reticulum;K03283//heat shock 70kDa protein 1/2/6/8+ko03040//Spliceosome+ko04144//Endocytosis+ko04141//Protein processing in endoplasmic reticulum;K03283//heat shock 70kDa protein 1/2/6/8+ko03040//Spliceosome+ko04144//Endocytosis+ko04141//Protein processing in endoplasmic r…	Hsp70 protein		heat shock 70 kDa protein [Blastocystis sp. ATCC 50177/Nand II]	[O] KOG0100 Molecular chaperones GRP78/BiP/KAR2, HSP70 superfamily	Mediator of RNA polymerase II transcription subunit 37f OS=Arabidopsis thaliana GN=MED37F PE=1 SV=2	GO:0005524//ATP binding
Unigene46407_All	1000	ko04141//Protein processing in endoplasmic reticulum	Genetic Information Processing	Folding, sorting and degradation	-2.93711	1.75437e-29	3.43071e-30	K08288//protein kinase C substrate 80K-H+ko04141//Protein processing in endoplasmic reticulum;K08288//protein kinase C substrate 80K-H+ko04141//Protein processing in endoplasmic reticulum;K08288//protein kinase C substrate 80K-H+ko04141//Protein processing in endoplasmic reticulum;K08288//protein kinase C substrate 80K-H+ko04141//Protein processing in endoplasmic reticulum;K08288//protein kinase …	Glucosidase II beta subunit-like		EF-Hand 1, calcium-binding site [Ostreococcus tauri]	[T] KOG2397 Protein kinase C substrate, 80 KD protein, heavy chain	Sulfated surface glycoprotein 185 OS=Volvox carteri PE=1 SV=1	GO:0016021//integral component of membrane
Unigene45224_All	1249	ko04141//Protein processing in endoplasmic reticulum	Genetic Information Processing	Folding, sorting and degradation	-2.95998	1.72638e-226	7.4964e-228	K09580//protein disulfide-isomerase A1 [EC:5.3.4.1]+ko04141//Protein processing in endoplasmic reticulum;K09580//protein disulfide-isomerase A1 [EC:5.3.4.1]+ko04141//Protein processing in endoplasmic reticulum;K09580//protein disulfide-isomerase A1 [EC:5.3.4.1]+ko04141//Protein processing in endoplasmic reticulum;K09580//protein disulfide-isomerase A1 [EC:5.3.4.1]+ko04141//Protein processing in e…	Thioredoxin		protein disulfide isomerase [Triticum aestivum]	[O] KOG0190 Protein disulfide isomerase (prolyl 4-hydroxylase beta subunit)	Protein disulfide isomerase-like 1-1 OS=Arabidopsis thaliana GN=PDIL1-1 PE=1 SV=1
Unigene33405_All	1890	ko04120//Ubiquitin mediated proteolysis;ko04141//Protein processing in endoplasmic reticulum	Genetic Information Processing	Folding, sorting and degradation	-2.99719	9.29314e-72	9.64442e-73	K03347//cullin 1+ko04141//Protein processing in endoplasmic reticulum+ko04120//Ubiquitin mediated proteolysis;K03347//cullin 1+ko04141//Protein processing in endoplasmic reticulum+ko04120//Ubiquitin mediated proteolysis;K03347//cullin 1+ko04141//Protein processing in endoplasmic reticulum+ko04120//Ubiquitin mediated proteolysis;K03347//cullin 1+ko04141//Protein processing in endoplasmic reticulum…	Cullin family	XM_014038487.1 Monoraphidium neglectum hypothetical protein mRNA	similar to Cullin-1 (CUL-1) isoform 1 [Ectocarpus siliculosus]	[D] KOG2166 Cullins	Vegetative cell wall protein gp1 OS=Chlamydomonas reinhardtii GN=GP1 PE=1 SV=1	GO:0006511//ubiquitin-dependent protein catabolic process;GO:0031625//ubiquitin protein ligase binding;GO:0042787//protein ubiquitination involved in ubiquitin-dependent protein catabolic process;GO:0031461//cullin-RING ubiquitin ligase complex
Unigene16426_All	510	ko04141//Protein processing in endoplasmic reticulum	Genetic Information Processing	Folding, sorting and degradation	-3.00841	1.66568e-10	6.50151e-11	K13993//HSP20 family protein+ko04141//Protein processing in endoplasmic reticulum;K13993//HSP20 family protein+ko04141//Protein processing in endoplasmic reticulum;K13993//HSP20 family protein+ko04141//Protein processing in endoplasmic reticulum;K13993//HSP20 family protein+ko04141//Protein processing in endoplasmic reticulum	Hsp20/alpha crystallin family		17.5 kDa class I heat shock protein-like [Cajanus cajan] >KYP42023.1 17.5 kDa class I heat shock protein [Cajanus cajan]	[O] KOG0710 Molecular chaperone (small heat-shock protein Hsp26/Hsp42)	17.5 kDa class I heat shock protein OS=Glycine max GN=HSP17.5-M PE=3 SV=1
Unigene29437_All	5425	ko04141//Protein processing in endoplasmic reticulum;ko04145//Phagosome;ko03020//RNA polymerase;ko03060//Protein export	Genetic Information Processing;Cellular Processes	Transport and catabolism;Transcription;Folding, sorting and degradation	-3.01195	3.75302e-171	2.04482e-172	K03040//DNA-directed RNA polymerase subunit alpha [EC:2.7.7.6]+ko03020//RNA polymerase;K10956//protein transport protein SEC61 subunit alpha+ko04145//Phagosome+ko04141//Protein processing in endoplasmic reticulum+ko03060//Protein export;K10956//protein transport protein SEC61 subunit alpha+ko04145//Phagosome+ko04141//Protein processing in endoplasmic reticulum+ko03060//Protein export;K10956//prot…	SecY translocase		PREDICTED: uncharacterized protein LOC103941582 [Pyrus x bretschneideri]	[F] KOG3078 Adenylate kinase	Protein translocase subunit SecY OS=Pyropia yezoensis GN=secY PE=3 SV=1
CL3.Contig43_All	1199	ko04141//Protein processing in endoplasmic reticulum;ko01100//Metabolic pathways;ko01230//Biosynthesis of amino acids;ko01110//Biosynthesis of secondary metabolites;ko00260//Glycine, serine and threonine metabolism;ko00400//Phenylalanine, tyrosine and tryptophan biosynthesis	Genetic Information Processing;Metabolism	Amino acid metabolism;Folding, sorting and degradation;Global and overview maps	-3.01328	8.0522e-36	1.37365e-36	K01695//tryptophan synthase alpha chain [EC:4.2.1.20]+ko01230//Biosynthesis of amino acids+ko01100//Metabolic pathways+ko01110//Biosynthesis of secondary metabolites+ko00260//Glycine, serine and threonine metabolism+ko00400//Phenylalanine, tyrosine and tryptophan biosynthesis;K14007//protein transport protein SEC24+ko04141//Protein processing in endoplasmic reticulum	Ankyrin repeats (many copies)		hypothetical protein PHYSODRAFT_494306 [Phytophthora sojae] >EGZ19644.1 hypothetical protein PHYSODRAFT_494306 [Phytophthora sojae]
CL4833.Contig2_All	1958	ko03420//Nucleotide excision repair;ko04141//Protein processing in endoplasmic reticulum;ko04626//Plant-pathogen interaction	Genetic Information Processing;Organismal Systems	Environmental adaptation;Folding, sorting and degradation;Replication and repair	-3.0574	1.14624e-261	4.43552e-263	K13412//calcium-dependent protein kinase [EC:2.7.11.1]+ko04626//Plant-pathogen interaction;K10839//UV excision repair protein RAD23+ko04141//Protein processing in endoplasmic reticulum+ko03420//Nucleotide excision repair;K10839//UV excision repair protein RAD23+ko04141//Protein processing in endoplasmic reticulum+ko03420//Nucleotide excision repair;K10839//UV excision repair protein RAD23+ko04141…	Phosphatidylinositol 3-kinase regulatory subunit P85 inter-SH2 domain		Cap-specific mRNA (nucleoside-2'-O-)-methyltransferase 1 [Symbiodinium microadriaticum]	[T] KOG4743 Cyclin-dependent kinase inhibitor	Myrosinase-binding protein 2 OS=Arabidopsis thaliana GN=F-ATMBP PE=2 SV=1
Unigene24497_All	465	ko04141//Protein processing in endoplasmic reticulum	Genetic Information Processing	Folding, sorting and degradation	-3.0788	1.36056e-12	4.69705e-13	K08288//protein kinase C substrate 80K-H+ko04141//Protein processing in endoplasmic reticulum;K08288//protein kinase C substrate 80K-H+ko04141//Protein processing in endoplasmic reticulum;K08288//protein kinase C substrate 80K-H+ko04141//Protein processing in endoplasmic reticulum;K08288//protein kinase C substrate 80K-H+ko04141//Protein processing in endoplasmic reticulum	Glucosidase II beta subunit-like protein		PREDICTED: glucosidase 2 subunit beta isoform X1 [Elaeis guineensis]	[T] KOG2397 Protein kinase C substrate, 80 KD protein, heavy chain	Glucosidase 2 subunit beta OS=Oryza sativa subsp. indica GN=OsI_01383 PE=3 SV=1	GO:0006491//N-glycan processing
CL2062.Contig2_All	1578	ko04141//Protein processing in endoplasmic reticulum	Genetic Information Processing	Folding, sorting and degradation	-3.15815	2.73859e-10	1.08165e-10	K09503//DnaJ homolog subfamily A member 2+ko04141//Protein processing in endoplasmic reticulum;K09503//DnaJ homolog subfamily A member 2+ko04141//Protein processing in endoplasmic reticulum;K09517//DnaJ homolog subfamily B member 11+ko04141//Protein processing in endoplasmic reticulum	DnaJ domain		Heat shock protein 40 [Ectocarpus siliculosus]	[V] KOG0624 dsRNA-activated protein kinase inhibitor P58, contains TPR and DnaJ domains	DnaJ protein P58IPK homolog A OS=Oryza sativa subsp. japonica GN=P58A PE=1 SV=1	GO:0006457//protein folding;GO:0046872//metal ion binding;GO:0051082//unfolded protein binding;GO:0031072//heat shock protein binding
Unigene33581_All	1433	ko04141//Protein processing in endoplasmic reticulum	Genetic Information Processing	Folding, sorting and degradation	-3.16534	7.9423e-40	1.25459e-40	K08653//membrane-bound transcription factor site-1 protease [EC:3.4.21.112]+ko04141//Protein processing in endoplasmic reticulum;K08653//membrane-bound transcription factor site-1 protease [EC:3.4.21.112]+ko04141//Protein processing in endoplasmic reticulum;K08653//membrane-bound transcription factor site-1 protease [EC:3.4.21.112]+ko04141//Protein processing in endoplasmic reticulum	Subtilase family		secreted protein [Thraustotheca clavata]	[O] KOG4266 Subtilisin kexin isozyme-1/site 1 protease, subtilase superfamily	Subtilisin-like protease SBT6.1 OS=Arabidopsis thaliana GN=SBT6.1 PE=1 SV=1	GO:0004252//serine-type endopeptidase activity;GO:0016021//integral component of membrane
Unigene2753_All	551	ko04141//Protein processing in endoplasmic reticulum;ko03060//Protein export;ko04145//Phagosome	Cellular Processes;Genetic Information Processing	Folding, sorting and degradation;Transport and catabolism	-3.28233	9.89031e-05	6.48512e-05	K10956//protein transport protein SEC61 subunit alpha+ko04145//Phagosome+ko04141//Protein processing in endoplasmic reticulum+ko03060//Protein export;K10956//protein transport protein SEC61 subunit alpha+ko04145//Phagosome+ko04141//Protein processing in endoplasmic reticulum+ko03060//Protein export;K10956//protein transport protein SEC61 subunit alpha+ko04145//Phagosome+ko04141//Protein processin…	SecY translocase		PREDICTED: uncharacterized protein LOC103941582 [Pyrus x bretschneideri]		Protein translocase subunit SecY OS=Porphyra purpurea GN=secY PE=3 SV=1	GO:0006605//protein targeting;GO:0065002//intracellular protein transmembrane transport;GO:0009535//chloroplast thylakoid membrane;GO:0016021//integral component of membrane;GO:0009536//plastid;GO:0005886//plasma membrane
CL10582.Contig1_All	5472	ko03060//Protein export;ko04145//Phagosome;ko04141//Protein processing in endoplasmic reticulum	Cellular Processes;Genetic Information Processing	Folding, sorting and degradation;Transport and catabolism	-3.29528	0	0	K10956//protein transport protein SEC61 subunit alpha+ko04145//Phagosome+ko04141//Protein processing in endoplasmic reticulum+ko03060//Protein export;K10956//protein transport protein SEC61 subunit alpha+ko04145//Phagosome+ko04141//Protein processing in endoplasmic reticulum+ko03060//Protein export;K10956//protein transport protein SEC61 subunit alpha+ko04145//Phagosome+ko04141//Protein processin…	SecY translocase		PREDICTED: uncharacterized protein LOC103941582 [Pyrus x bretschneideri]	[J] KOG0408 Mitochondrial/chloroplast ribosomal protein S11	Protein translocase subunit SecY OS=Pyropia yezoensis GN=secY PE=3 SV=1	GO:0006605//protein targeting;GO:0065002//intracellular protein transmembrane transport;GO:0009535//chloroplast thylakoid membrane;GO:0016021//integral component of membrane;GO:0009536//plastid;GO:0005886//plasma membrane
Unigene29689_All	2311	ko03040//Spliceosome;ko04144//Endocytosis;ko04141//Protein processing in endoplasmic reticulum	Cellular Processes;Genetic Information Processing	Transport and catabolism;Folding, sorting and degradation;Transcription	-3.39946	0	0	K03283//heat shock 70kDa protein 1/2/6/8+ko03040//Spliceosome+ko04144//Endocytosis+ko04141//Protein processing in endoplasmic reticulum;K03283//heat shock 70kDa protein 1/2/6/8+ko03040//Spliceosome+ko04144//Endocytosis+ko04141//Protein processing in endoplasmic reticulum;K03283//heat shock 70kDa protein 1/2/6/8+ko03040//Spliceosome+ko04144//Endocytosis+ko04141//Protein processing in endoplasmic r…	Hsp70 protein	XM_012338184.1 Saprolegnia parasitica CBS 223.65 hsp70-like protein mRNA	heat shock protein 70 [Aureococcus anophagefferens] >EGB12199.1 heat shock protein 70 [Aureococcus anophagefferens]	[O] KOG0101 Molecular chaperones HSP70/HSC70, HSP70 superfamily	Heat shock 70 kDa protein OS=Achlya klebsiana GN=HSP70 PE=2 SV=1	GO:0005524//ATP binding
Unigene30339_All	1417	ko04141//Protein processing in endoplasmic reticulum	Genetic Information Processing	Folding, sorting and degradation	-3.45843	7.75954e-32	1.4467e-32	K02184//formin 2;K14007//protein transport protein SEC24+ko04141//Protein processing in endoplasmic reticulum;K02184//formin 2			PREDICTED: lysine-rich arabinogalactan protein 19 [Citrus sinensis]	[S] KOG4672 Uncharacterized conserved low complexity protein
Unigene72935_All	899	ko03060//Protein export;ko04145//Phagosome;ko04141//Protein processing in endoplasmic reticulum	Genetic Information Processing;Cellular Processes	Folding, sorting and degradation;Transport and catabolism	-3.49384	1.73182e-05	1.03114e-05	K10956//protein transport protein SEC61 subunit alpha+ko04145//Phagosome+ko04141//Protein processing in endoplasmic reticulum+ko03060//Protein export;K22020//mucin-19;K18758//DIS3-like exonuclease 2 [EC:3.1.13.-]	RNB domain		exosome complex exonuclease RRP44, putative [Phytophthora infestans T30-4] >EEY68068.1 exosome complex exonuclease RRP44, putative [Phytophthora infestans T30-4]	[J] KOG2102 Exosomal 3'-5' exoribonuclease complex, subunit Rrp44/Dis3	Inactive exonuclease DIS3L2 OS=Arabidopsis thaliana GN=SOV PE=2 SV=1	GO:0006401//RNA catabolic process;GO:0006364//rRNA processing;GO:0004519//endonuclease activity;GO:0000175//3'-5'-exoribonuclease activity;GO:0000178//exosome (RNase complex)
CL3648.Contig2_All	1065	ko04144//Endocytosis;ko03040//Spliceosome;ko04141//Protein processing in endoplasmic reticulum	Cellular Processes;Genetic Information Processing	Folding, sorting and degradation;Transcription;Transport and catabolism	-3.55797	9.66219e-06	5.58057e-06	K03283//heat shock 70kDa protein 1/2/6/8+ko03040//Spliceosome+ko04144//Endocytosis+ko04141//Protein processing in endoplasmic reticulum;K03283//heat shock 70kDa protein 1/2/6/8+ko03040//Spliceosome+ko04144//Endocytosis+ko04141//Protein processing in endoplasmic reticulum;K03283//heat shock 70kDa protein 1/2/6/8+ko03040//Spliceosome+ko04144//Endocytosis+ko04141//Protein processing in endoplasmic r…	MreB/Mbl protein		Rod shape determining protein (chromatophore) [Paulinella chromatophora] >ACB42894.1 Rod shape determining protein (chromatophore) [Paulinella chromatophora]	[O] KOG0101 Molecular chaperones HSP70/HSC70, HSP70 superfamily	Chaperone protein dnaK OS=Emiliania huxleyi GN=dnaK PE=3 SV=1	GO:0006457//protein folding;GO:0000902//cell morphogenesis;GO:0005524//ATP binding;GO:0051082//unfolded protein binding;GO:0009536//plastid;GO:0009507//chloroplast
CL4894.Contig3_All	830	ko04141//Protein processing in endoplasmic reticulum	Genetic Information Processing	Folding, sorting and degradation	-3.56762	1.85102e-58	2.23557e-59	K13993//HSP20 family protein+ko04141//Protein processing in endoplasmic reticulum;K13993//HSP20 family protein+ko04141//Protein processing in endoplasmic reticulum;K13993//HSP20 family protein+ko04141//Protein processing in endoplasmic reticulum;K13993//HSP20 family protein+ko04141//Protein processing in endoplasmic reticulum;K13993//HSP20 family protein+ko04141//Protein processing in endoplasmic…	Hsp20/alpha crystallin family		small heat shock protein 17.3CII [Dorcoceras hygrometricum]	[O] KOG0710 Molecular chaperone (small heat-shock protein Hsp26/Hsp42)	16.9 kDa class I heat shock protein 3 OS=Oryza sativa subsp. japonica GN=HSP16.9C PE=2 SV=1	GO:0009408//response to heat;GO:0005737//cytoplasm;GO:0051259//protein oligomerization
Unigene9980_All	1052	ko04141//Protein processing in endoplasmic reticulum;ko04145//Phagosome;ko03060//Protein export	Cellular Processes;Genetic Information Processing	Transport and catabolism;Folding, sorting and degradation	-3.63629	1.12459e-17	3.10345e-18	K04936//potassium large conductance calcium-activated channel subfamily M alpha member 1;K10956//protein transport protein SEC61 subunit alpha+ko04145//Phagosome+ko04141//Protein processing in endoplasmic reticulum+ko03060//Protein export;K04936//potassium large conductance calcium-activated channel subfamily M alpha member 1;K04936//potassium large conductance calcium-activated channel subfamily…	Ion transport protein		hypothetical protein SPRG_04190 [Saprolegnia parasitica CBS 223.65] >KDO31002.1 hypothetical protein SPRG_04190 [Saprolegnia parasitica CBS 223.65]	[PT] KOG1420 Ca2+-activated K+ channel Slowpoke, alpha subunit		GO:0005249//voltage-gated potassium channel activity;GO:0008076//voltage-gated potassium channel complex
Unigene10_All	3594	ko04141//Protein processing in endoplasmic reticulum	Genetic Information Processing	Folding, sorting and degradation	-3.64582	6.98061e-47	9.85025e-48	K14007//protein transport protein SEC24+ko04141//Protein processing in endoplasmic reticulum;K19719//collagen, type II, alpha;K14007//protein transport protein SEC24+ko04141//Protein processing in endoplasmic reticulum	TolB amino-terminal domain		hypothetical protein BU14_0056s0048 [Porphyra umbilicalis]	[K] KOG2341 TATA box binding protein (TBP)-associated factor, RNA polymerase II		GO:0005509//calcium ion binding
Unigene29740_All	2101	ko03060//Protein export;ko03015//mRNA surveillance pathway;ko04141//Protein processing in endoplasmic reticulum;ko03013//RNA transport;ko04145//Phagosome	Genetic Information Processing;Cellular Processes	Translation;Folding, sorting and degradation;Transport and catabolism	-3.69324	2.22377e-117	1.6128e-118	K13171//serine/arginine repetitive matrix protein 1+ko03015//mRNA surveillance pathway+ko03013//RNA transport;K10956//protein transport protein SEC61 subunit alpha+ko04145//Phagosome+ko04141//Protein processing in endoplasmic reticulum+ko03060//Protein export;K13171//serine/arginine repetitive matrix protein 1+ko03015//mRNA surveillance pathway+ko03013//RNA transport	Common central domain of tyrosinase		hypothetical protein AURANDRAFT_64134 [Aureococcus anophagefferens] >EGB08164.1 hypothetical protein AURANDRAFT_64134 [Aureococcus anophagefferens]	[R] KOG0118 FOG: RRM domain	Serine/arginine-rich splicing factor SR45 OS=Arabidopsis thaliana GN=SR45 PE=1 SV=1	GO:0046872//metal ion binding;GO:0016021//integral component of membrane;GO:0016491//oxidoreductase activity
Unigene60424_All	2732	ko04141//Protein processing in endoplasmic reticulum;ko04145//Phagosome;ko03060//Protein export	Cellular Processes;Genetic Information Processing	Folding, sorting and degradation;Transport and catabolism	-3.72472	8.82675e-30	1.71544e-30	K10956//protein transport protein SEC61 subunit alpha+ko04145//Phagosome+ko04141//Protein processing in endoplasmic reticulum+ko03060//Protein export;K10956//protein transport protein SEC61 subunit alpha+ko04145//Phagosome+ko04141//Protein processing in endoplasmic reticulum+ko03060//Protein export;K10956//protein transport protein SEC61 subunit alpha+ko04145//Phagosome+ko04141//Protein processin…	SecY translocase		PREDICTED: uncharacterized protein LOC103941582 [Pyrus x bretschneideri]	[F] KOG3078 Adenylate kinase	Preprotein translocase subunit SECY, chloroplastic OS=Pisum sativum GN=SECY PE=2 SV=1
Unigene79043_All	546	ko04141//Protein processing in endoplasmic reticulum;ko00053//Ascorbate and aldarate metabolism;ko01100//Metabolic pathways;ko00520//Amino sugar and nucleotide sugar metabolism;ko03420//Nucleotide excision repair;ko00040//Pentose and glucuronate interconversions;ko00052//Galactose metabolism	Genetic Information Processing;Metabolism	Global and overview maps;Carbohydrate metabolism;Replication and repair;Folding, sorting and degradation	-3.9413	0.000208698	0.000143657	K10990//RecQ-mediated genome instability protein 1;K12447//UDP-sugar pyrophosphorylase [EC:2.7.7.64]+ko00520//Amino sugar and nucleotide sugar metabolism+ko00040//Pentose and glucuronate interconversions+ko01100//Metabolic pathways+ko00052//Galactose metabolism+ko00053//Ascorbate and aldarate metabolism;K10839//UV excision repair protein RAD23+ko04141//Protein processing in endoplasmic reticulum+…	Procyclic acidic repetitive protein (PARP)	GU814015.1 Chlamydomonas reinhardtii strain CC-2290 NIC7m (NIC7m), SPS1m (SPS1m), SPP1Cm (SPP1Cm), EIF5Bbm (EIF5Bbm), PTC1m (PTC1m), 182394m (182394m), 97782m (97782m), RFC4m (RFC4m), 182392m (182392m), ALB3m (ALB3m), PSF2m (PSF2m), 182390m (182390m), 182389m (182389m), 294687m (294687m), HDH1m (HDH1m), TOC34m (TOC34m), 522875m (522875m), LPS1m (LPS1m), PDK1m (PDK1m), CGL70m (CGL70m), NMDA1m (NMD…	hypothetical protein H310_01499 [Aphanomyces invadans] >ETW09031.1 hypothetical protein H310_01499 [Aphanomyces invadans]	[J] KOG2975 Translation initiation factor 3, subunit f (eIF-3f)	Myrosinase-binding protein 2 OS=Arabidopsis thaliana GN=F-ATMBP PE=2 SV=1	GO:0016021//integral component of membrane
Unigene4213_All	1090	ko04141//Protein processing in endoplasmic reticulum	Genetic Information Processing	Folding, sorting and degradation	-4.06621	1.06378e-11	3.85904e-12	K14007//protein transport protein SEC24+ko04141//Protein processing in endoplasmic reticulum;K02184//formin 2;K14007//protein transport protein SEC24+ko04141//Protein processing in endoplasmic reticulum			flagellar associated protein [Ectocarpus siliculosus]	[W] KOG3544 Collagens (type IV and type XIII), and related proteins
Unigene48126_All	416	ko04145//Phagosome;ko03060//Protein export;ko04141//Protein processing in endoplasmic reticulum	Cellular Processes;Genetic Information Processing	Folding, sorting and degradation;Transport and catabolism	-4.20433	3.54307e-05	2.18945e-05	K10956//protein transport protein SEC61 subunit alpha+ko04145//Phagosome+ko04141//Protein processing in endoplasmic reticulum+ko03060//Protein export;K10956//protein transport protein SEC61 subunit alpha+ko04145//Phagosome+ko04141//Protein processing in endoplasmic reticulum+ko03060//Protein export;K10956//protein transport protein SEC61 subunit alpha+ko04145//Phagosome+ko04141//Protein processin…	SecY translocase		protein translocase subunit SecY (plastid) [Vertebrata lanosa] >AJH65913.1 protein translocase subunit SecY (plastid) [Vertebrata lanosa]		Protein translocase subunit SecY (Fragment) OS=Pyrenomonas salina GN=secY PE=3 SV=1	GO:0006605//protein targeting;GO:0065002//intracellular protein transmembrane transport;GO:0009535//chloroplast thylakoid membrane;GO:0016021//integral component of membrane;GO:0009536//plastid;GO:0005886//plasma membrane
Unigene8945_All	3472	ko03040//Spliceosome;ko04141//Protein processing in endoplasmic reticulum;ko04144//Endocytosis	Cellular Processes;Genetic Information Processing	Transcription;Folding, sorting and degradation;Transport and catabolism	-4.30753	0	0	K03283//heat shock 70kDa protein 1/2/6/8+ko03040//Spliceosome+ko04144//Endocytosis+ko04141//Protein processing in endoplasmic reticulum;K03283//heat shock 70kDa protein 1/2/6/8+ko03040//Spliceosome+ko04144//Endocytosis+ko04141//Protein processing in endoplasmic reticulum;K03283//heat shock 70kDa protein 1/2/6/8+ko03040//Spliceosome+ko04144//Endocytosis+ko04141//Protein processing in endoplasmic r…	Hsp70 protein	XM_008371654.2 PREDICTED: Malus x domestica probable mediator of RNA polymerase II transcription subunit 37e (LOC103433399), mRNA	heat shock protein 70 [Vaucheria litorea]	[O] KOG0101 Molecular chaperones HSP70/HSC70, HSP70 superfamily	Heat shock 70 kDa protein OS=Achlya klebsiana GN=HSP70 PE=2 SV=1
Unigene14934_All	1013	ko04141//Protein processing in endoplasmic reticulum	Genetic Information Processing	Folding, sorting and degradation	-4.44082	1.04355e-34	1.8285e-35	K02184//formin 2;K14007//protein transport protein SEC24+ko04141//Protein processing in endoplasmic reticulum;K14007//protein transport protein SEC24+ko04141//Protein processing in endoplasmic reticulum;K05740//diaphanous 1+ko04933//AGE-RAGE signaling pathway in diabetic complications	Gene 66 (IR5) protein		PREDICTED: extensin-like, partial [Camelina sativa]	[W] KOG3544 Collagens (type IV and type XIII), and related proteins	Formin-like protein 18 OS=Oryza sativa subsp. japonica GN=FH18 PE=2 SV=1
Unigene10907_All	1169	ko04141//Protein processing in endoplasmic reticulum;ko03040//Spliceosome;ko04144//Endocytosis	Cellular Processes;Genetic Information Processing	Folding, sorting and degradation;Transcription;Transport and catabolism	-4.50744	0	0	K03283//heat shock 70kDa protein 1/2/6/8+ko03040//Spliceosome+ko04144//Endocytosis+ko04141//Protein processing in endoplasmic reticulum;K03283//heat shock 70kDa protein 1/2/6/8+ko03040//Spliceosome+ko04144//Endocytosis+ko04141//Protein processing in endoplasmic reticulum;K03283//heat shock 70kDa protein 1/2/6/8+ko03040//Spliceosome+ko04144//Endocytosis+ko04141//Protein processing in endoplasmic r…	Hsp70 protein	XM_002901339.1 Phytophthora infestans T30-4 heat shock cognate 70 kDa protein (PITG_11913) mRNA, complete cds	hsp70-like protein [Aphanomyces invadans] >ETW06326.1 hsp70-like protein [Aphanomyces invadans]	[O] KOG0101 Molecular chaperones HSP70/HSC70, HSP70 superfamily	Heat shock 70 kDa protein OS=Achlya klebsiana GN=HSP70 PE=2 SV=1	GO:0005524//ATP binding
Unigene489_All	1946	ko01100//Metabolic pathways;ko03013//RNA transport;ko04141//Protein processing in endoplasmic reticulum;ko03015//mRNA surveillance pathway;ko00940//Phenylpropanoid biosynthesis;ko01110//Biosynthesis of secondary metabolites	Metabolism;Genetic Information Processing	Biosynthesis of other secondary metabolites;Translation;Global and overview maps;Folding, sorting and degradation	-4.53737	3.98038e-114	2.93722e-115	K14007//protein transport protein SEC24+ko04141//Protein processing in endoplasmic reticulum;K13171//serine/arginine repetitive matrix protein 1+ko03015//mRNA surveillance pathway+ko03013//RNA transport;K13171//serine/arginine repetitive matrix protein 1+ko03015//mRNA surveillance pathway+ko03013//RNA transport;K00430//peroxidase [EC:1.11.1.7]+ko01100//Metabolic pathways+ko01110//Biosynthesis of …	Ornithine cyclodeaminase/mu-crystallin family	XR_002508370.1 PREDICTED: Chenopodium quinoa uncharacterized LOC110706538 (LOC110706538), transcript variant X7, ncRNA	predicted protein [Phaeodactylum tricornutum CCAP 1055/1] >EEC48235.1 predicted protein [Phaeodactylum tricornutum CCAP 1055/1]	[W] KOG3544 Collagens (type IV and type XIII), and related proteins		GO:0016639//oxidoreductase activity, acting on the CH-NH2 group of donors, NAD or NADP as acceptor;GO:0005737//cytoplasm;GO:0008473//ornithine cyclodeaminase activity
CL4818.Contig2_All	1354	ko03060//Protein export;ko03015//mRNA surveillance pathway;ko04145//Phagosome;ko03013//RNA transport;ko04141//Protein processing in endoplasmic reticulum	Genetic Information Processing;Cellular Processes	Transport and catabolism;Translation;Folding, sorting and degradation	-4.61389	7.55188e-61	8.86106e-62	K10956//protein transport protein SEC61 subunit alpha+ko04145//Phagosome+ko04141//Protein processing in endoplasmic reticulum+ko03060//Protein export;K13171//serine/arginine repetitive matrix protein 1+ko03015//mRNA surveillance pathway+ko03013//RNA transport	Bacterial extracellular solute-binding protein		hypothetical protein CHLNCDRAFT_140537 [Chlorella variabilis] >EFN58780.1 hypothetical protein CHLNCDRAFT_140537 [Chlorella variabilis]	[T] LSE0513 C 7-transmembrane receptor
Unigene17326_All	547	ko04141//Protein processing in endoplasmic reticulum	Genetic Information Processing	Folding, sorting and degradation	-4.61937	0.000536232	0.000394685	K08653//membrane-bound transcription factor site-1 protease [EC:3.4.21.112]+ko04141//Protein processing in endoplasmic reticulum;K08653//membrane-bound transcription factor site-1 protease [EC:3.4.21.112]+ko04141//Protein processing in endoplasmic reticulum;K08653//membrane-bound transcription factor site-1 protease [EC:3.4.21.112]+ko04141//Protein processing in endoplasmic reticulum;K08653//memb…	Subtilase family		hypothetical protein BU14_1784s0001 [Porphyra umbilicalis]	[O] KOG3526 Subtilisin-like proprotein convertase	Subtilisin-like protease SBT6.1 OS=Arabidopsis thaliana GN=SBT6.1 PE=1 SV=1	GO:0004252//serine-type endopeptidase activity
Unigene46439_All	1619	ko04141//Protein processing in endoplasmic reticulum;ko03040//Spliceosome;ko04144//Endocytosis	Genetic Information Processing;Cellular Processes	Transcription;Folding, sorting and degradation;Transport and catabolism	-4.63927	7.95147e-18	2.18039e-18	K03283//heat shock 70kDa protein 1/2/6/8+ko03040//Spliceosome+ko04144//Endocytosis+ko04141//Protein processing in endoplasmic reticulum;K03283//heat shock 70kDa protein 1/2/6/8+ko03040//Spliceosome+ko04144//Endocytosis+ko04141//Protein processing in endoplasmic reticulum;K03283//heat shock 70kDa protein 1/2/6/8+ko03040//Spliceosome+ko04144//Endocytosis+ko04141//Protein processing in endoplasmic r…	Hsp70 protein	XM_009035025.1 Aureococcus anophagefferens heat shock protein 70 mRNA	heat shock 70 kDa protein [Thraustotheca clavata]	[O] KOG0101 Molecular chaperones HSP70/HSC70, HSP70 superfamily	Heat shock 70 kDa protein OS=Achlya klebsiana GN=HSP70 PE=2 SV=1	GO:0005524//ATP binding
Unigene79146_All	603	ko04141//Protein processing in endoplasmic reticulum;ko04144//Endocytosis;ko03040//Spliceosome	Cellular Processes;Genetic Information Processing	Transcription;Folding, sorting and degradation;Transport and catabolism	-4.9413	9.37088e-05	6.12248e-05	K03283//heat shock 70kDa protein 1/2/6/8+ko03040//Spliceosome+ko04144//Endocytosis+ko04141//Protein processing in endoplasmic reticulum	MreB/Mbl protein		Rod shape determining protein (plastid) [Paulinella micropora] >AQX45004.1 Rod shape determining protein (plastid) [Paulinella micropora]	[O] KOG0101 Molecular chaperones HSP70/HSC70, HSP70 superfamily		GO:0000902//cell morphogenesis;GO:0009536//plastid
Unigene88335_All	565	ko04141//Protein processing in endoplasmic reticulum	Genetic Information Processing	Folding, sorting and degradation	-4.9413	9.37088e-05	6.12248e-05	K07953//GTP-binding protein SAR1 [EC:3.6.5.-]+ko04141//Protein processing in endoplasmic reticulum;K07953//GTP-binding protein SAR1 [EC:3.6.5.-]+ko04141//Protein processing in endoplasmic reticulum;K07953//GTP-binding protein SAR1 [EC:3.6.5.-]+ko04141//Protein processing in endoplasmic reticulum;K07953//GTP-binding protein SAR1 [EC:3.6.5.-]+ko04141//Protein processing in endoplasmic reticulum;K07…	ADP-ribosylation factor family		COPII GTPase subunit SAR1 [Phytophthora megakarya]	[U] KOG0077 Vesicle coat complex COPII, GTPase subunit SAR1	GTP-binding protein SAR2 OS=Solanum lycopersicum GN=SAR2 PE=2 SV=1	GO:0006886//intracellular protein transport;GO:0005783//endoplasmic reticulum;GO:0005794//Golgi apparatus;GO:0005525//GTP binding;GO:0016192//vesicle-mediated transport
Unigene87879_All	811	ko01110//Biosynthesis of secondary metabolites;ko00940//Phenylpropanoid biosynthesis;ko04141//Protein processing in endoplasmic reticulum;ko03060//Protein export;ko01100//Metabolic pathways;ko04145//Phagosome	Genetic Information Processing;Cellular Processes;Metabolism	Biosynthesis of other secondary metabolites;Folding, sorting and degradation;Global and overview maps;Transport and catabolism	-5.0344	5.26998e-05	3.32497e-05	K10990//RecQ-mediated genome instability protein 1;K00430//peroxidase [EC:1.11.1.7]+ko01100//Metabolic pathways+ko01110//Biosynthesis of secondary metabolites+ko00940//Phenylpropanoid biosynthesis;K00430//peroxidase [EC:1.11.1.7]+ko01100//Metabolic pathways+ko01110//Biosynthesis of secondary metabolites+ko00940//Phenylpropanoid biosynthesis;K10956//protein transport protein SEC61 subunit alpha+ko…	MAC/Perforin domain		Lipid transfer protein [Medicago truncatula] >AES64536.1 Lipid transfer protein [Medicago truncatula]	[A] KOG1869 Splicing coactivator SRm160/300, subunit SRm300	Vegetative cell wall protein gp1 OS=Chlamydomonas reinhardtii GN=GP1 PE=1 SV=1	GO:0016539//intein-mediated protein splicing;GO:0008233//peptidase activity;GO:0016021//integral component of membrane
CL3762.Contig2_All	971	ko03008//Ribosome biogenesis in eukaryotes;ko04141//Protein processing in endoplasmic reticulum	Genetic Information Processing	Folding, sorting and degradation;Translation	-5.15044	2.44141e-05	1.47853e-05	K13525//transitional endoplasmic reticulum ATPase+ko04141//Protein processing in endoplasmic reticulum;K13525//transitional endoplasmic reticulum ATPase+ko04141//Protein processing in endoplasmic reticulum;K13525//transitional endoplasmic reticulum ATPase+ko04141//Protein processing in endoplasmic reticulum;K14571//ribosome biogenesis ATPase+ko03008//Ribosome biogenesis in eukaryotes	ATPase family associated with various cellular activities (AAA)			[O] KOG0730 AAA+-type ATPase
Unigene57673_All	601	ko03040//Spliceosome;ko04141//Protein processing in endoplasmic reticulum;ko04144//Endocytosis;ko03060//Protein export	Cellular Processes;Genetic Information Processing	Folding, sorting and degradation;Transcription;Transport and catabolism	-5.20433	1.67523e-05	9.94983e-06	K09490//heat shock 70kDa protein 5+ko04141//Protein processing in endoplasmic reticulum+ko03060//Protein export;K09490//heat shock 70kDa protein 5+ko04141//Protein processing in endoplasmic reticulum+ko03060//Protein export;K03283//heat shock 70kDa protein 1/2/6/8+ko03040//Spliceosome+ko04144//Endocytosis+ko04141//Protein processing in endoplasmic reticulum;K03283//heat shock 70kDa protein 1/2/6/…	MreB/Mbl protein		Rod shape determining protein (plastid) [Paulinella micropora] >AQX45004.1 Rod shape determining protein (plastid) [Paulinella micropora]	[O] KOG0100 Molecular chaperones GRP78/BiP/KAR2, HSP70 superfamily	Chaperone protein dnaK OS=Diacronema lutheri GN=dnaK PE=3 SV=1	GO:0000902//cell morphogenesis;GO:0006457//protein folding;GO:0005524//ATP binding;GO:0051082//unfolded protein binding;GO:0009536//plastid;GO:0009507//chloroplast
Unigene70456_All	551	ko01100//Metabolic pathways;ko00910//Nitrogen metabolism;ko00940//Phenylpropanoid biosynthesis;ko04141//Protein processing in endoplasmic reticulum;ko03420//Nucleotide excision repair;ko01110//Biosynthesis of secondary metabolites;ko04626//Plant-pathogen interaction	Metabolism;Organismal Systems;Genetic Information Processing	Folding, sorting and degradation;Global and overview maps;Biosynthesis of other secondary metabolites;Replication and repair;Energy metabolism;Environmental adaptation	-5.20433	1.01231e-09	4.14773e-10	K01674//carbonic anhydrase [EC:4.2.1.1]+ko00910//Nitrogen metabolism;K13412//calcium-dependent protein kinase [EC:2.7.11.1]+ko04626//Plant-pathogen interaction;K10839//UV excision repair protein RAD23+ko04141//Protein processing in endoplasmic reticulum+ko03420//Nucleotide excision repair;K00430//peroxidase [EC:1.11.1.7]+ko01100//Metabolic pathways+ko01110//Biosynthesis of secondary metabolites+k…	TonB N-terminal region		hypothetical protein H310_14826, partial [Aphanomyces invadans] >ETV90400.1 hypothetical protein H310_14826, partial [Aphanomyces invadans]	[R] KOG0382 Carbonic anhydrase	Myrosinase-binding protein 2 OS=Arabidopsis thaliana GN=MBP2 PE=2 SV=1
Unigene13937_All	2261	ko04141//Protein processing in endoplasmic reticulum	Genetic Information Processing	Folding, sorting and degradation	-5.20944	0	0	K13993//HSP20 family protein+ko04141//Protein processing in endoplasmic reticulum;K13993//HSP20 family protein+ko04141//Protein processing in endoplasmic reticulum;K13993//HSP20 family protein+ko04141//Protein processing in endoplasmic reticulum	Hsp20/alpha crystallin family		PREDICTED: spore protein SP21-like [Ziziphus jujuba]	[O] KOG0710 Molecular chaperone (small heat-shock protein Hsp26/Hsp42)	17.9 kDa class II heat shock protein OS=Glycine max GN=HSP17.9-D PE=3 SV=1
Unigene42713_All	1227	ko00940//Phenylpropanoid biosynthesis;ko03040//Spliceosome;ko01110//Biosynthesis of secondary metabolites;ko04141//Protein processing in endoplasmic reticulum;ko01100//Metabolic pathways	Genetic Information Processing;Metabolism	Biosynthesis of other secondary metabolites;Transcription;Global and overview maps;Folding, sorting and degradation	-5.37425	2.22353e-20	5.57531e-21	K02184//formin 2;K12900//FUS-interacting serine-arginine-rich protein 1+ko03040//Spliceosome;K14007//protein transport protein SEC24+ko04141//Protein processing in endoplasmic reticulum;K00430//peroxidase [EC:1.11.1.7]+ko01100//Metabolic pathways+ko01110//Biosynthesis of secondary metabolites+ko00940//Phenylpropanoid biosynthesis	Ppx/GppA phosphatase family		Ppx/GppA phosphatase [Macleaya cordata]	[R] KOG4197 FOG: PPR repeat	Vegetative cell wall protein gp1 OS=Chlamydomonas reinhardtii GN=GP1 PE=1 SV=1	GO:0016021//integral component of membrane
Unigene46703_All	1774	ko04141//Protein processing in endoplasmic reticulum	Genetic Information Processing	Folding, sorting and degradation	-5.47652	7.89826e-22	1.88559e-22	K16628//collagen, type VII, alpha;K22020//mucin-19;K14026//SEL1 protein+ko04141//Protein processing in endoplasmic reticulum	Lactonase, 7-bladed beta-propeller		conserved hypothetical protein [Ricinus communis]
Unigene18883_All	1475	ko00564//Glycerophospholipid metabolism;ko04141//Protein processing in endoplasmic reticulum;ko01100//Metabolic pathways	Genetic Information Processing;Metabolism	Lipid metabolism;Global and overview maps;Folding, sorting and degradation	-5.51464	0	0	K13993//HSP20 family protein+ko04141//Protein processing in endoplasmic reticulum;K13993//HSP20 family protein+ko04141//Protein processing in endoplasmic reticulum;K08744//cardiolipin synthase (CMP-forming) [EC:2.7.8.41]+ko01100//Metabolic pathways+ko00564//Glycerophospholipid metabolism;K13993//HSP20 family protein+ko04141//Protein processing in endoplasmic reticulum;K13993//HSP20 family protein…	Hsp20/alpha crystallin family		PREDICTED: 17.1 kDa class II heat shock protein-like [Nelumbo nucifera]	[O] KOG0710 Molecular chaperone (small heat-shock protein Hsp26/Hsp42)	17.1 kDa class II heat shock protein OS=Pisum sativum GN=HSP17.7 PE=1 SV=1
Unigene2514_All	764	ko04145//Phagosome;ko00940//Phenylpropanoid biosynthesis;ko03060//Protein export;ko01100//Metabolic pathways;ko04141//Protein processing in endoplasmic reticulum;ko01110//Biosynthesis of secondary metabolites	Metabolism;Cellular Processes;Genetic Information Processing	Biosynthesis of other secondary metabolites;Global and overview maps;Folding, sorting and degradation;Transport and catabolism	-5.70683	1.15154e-49	1.55567e-50	K02184//formin 2;K10956//protein transport protein SEC61 subunit alpha+ko04145//Phagosome+ko04141//Protein processing in endoplasmic reticulum+ko03060//Protein export;K00430//peroxidase [EC:1.11.1.7]+ko01100//Metabolic pathways+ko01110//Biosynthesis of secondary metabolites+ko00940//Phenylpropanoid biosynthesis;K00430//peroxidase [EC:1.11.1.7]+ko01100//Metabolic pathways+ko01110//Biosynthesis of …			hypothetical protein BU14_0130s0023 [Porphyra umbilicalis]	[K] KOG2341 TATA box binding protein (TBP)-associated factor, RNA polymerase II	Formin-like protein 16 OS=Oryza sativa subsp. japonica GN=FH16 PE=2 SV=1
Unigene86966_All	672	ko01100//Metabolic pathways;ko04145//Phagosome;ko03013//RNA transport;ko01110//Biosynthesis of secondary metabolites;ko00940//Phenylpropanoid biosynthesis;ko04141//Protein processing in endoplasmic reticulum;ko03060//Protein export	Genetic Information Processing;Metabolism;Cellular Processes	Translation;Global and overview maps;Transport and catabolism;Folding, sorting and degradation;Biosynthesis of other secondary metabolites	-5.73484	1.93371e-07	9.42656e-08	K17987//next to BRCA1 gene 1 protein;K10956//protein transport protein SEC61 subunit alpha+ko04145//Phagosome+ko04141//Protein processing in endoplasmic reticulum+ko03060//Protein export;K00430//peroxidase [EC:1.11.1.7]+ko01100//Metabolic pathways+ko01110//Biosynthesis of secondary metabolites+ko00940//Phenylpropanoid biosynthesis;K14306//nuclear pore complex protein Nup62+ko03013//RNA transport			protocadherin fat-like protein [Plasmopara halstedii]	[A] KOG1869 Splicing coactivator SRm160/300, subunit SRm300		GO:0007156//homophilic cell adhesion via plasma membrane adhesion molecules;GO:0005509//calcium ion binding;GO:0016021//integral component of membrane
Unigene87417_All	584	ko04141//Protein processing in endoplasmic reticulum;ko04144//Endocytosis;ko03040//Spliceosome	Cellular Processes;Genetic Information Processing	Transcription;Transport and catabolism;Folding, sorting and degradation	-5.73484	1.93371e-07	9.42656e-08	K03283//heat shock 70kDa protein 1/2/6/8+ko03040//Spliceosome+ko04144//Endocytosis+ko04141//Protein processing in endoplasmic reticulum;K03283//heat shock 70kDa protein 1/2/6/8+ko03040//Spliceosome+ko04144//Endocytosis+ko04141//Protein processing in endoplasmic reticulum;K03283//heat shock 70kDa protein 1/2/6/8+ko03040//Spliceosome+ko04144//Endocytosis+ko04141//Protein processing in endoplasmic r…	Hsp70 protein	XM_008617953.1 Saprolegnia diclina VS20 hsp70-like protein partial mRNA	Heat shock protein 70 [Phytophthora megakarya]	[O] KOG0101 Molecular chaperones HSP70/HSC70, HSP70 superfamily	Heat shock 70 kDa protein OS=Achlya klebsiana GN=HSP70 PE=2 SV=1
Unigene86941_All	581	ko03060//Protein export;ko04145//Phagosome;ko04141//Protein processing in endoplasmic reticulum	Cellular Processes;Genetic Information Processing	Folding, sorting and degradation;Transport and catabolism	-5.84176	6.50864e-08	3.04863e-08	K10956//protein transport protein SEC61 subunit alpha+ko04145//Phagosome+ko04141//Protein processing in endoplasmic reticulum+ko03060//Protein export	Protein of unknown function (DUF342)		hypothetical protein Naga_100406g12, partial [Nannochloropsis gaditana]
Unigene64736_All	1005	ko03060//Protein export;ko04145//Phagosome;ko04141//Protein processing in endoplasmic reticulum	Genetic Information Processing;Cellular Processes	Transport and catabolism;Folding, sorting and degradation	-5.89239	3.7937e-08	1.74201e-08	K10956//protein transport protein SEC61 subunit alpha+ko04145//Phagosome+ko04141//Protein processing in endoplasmic reticulum+ko03060//Protein export	Sulfotransferase family		PREDICTED: cell wall protein DAN4-like [Solanum tuberosum]
Unigene74076_All	1180	ko03013//RNA transport;ko04141//Protein processing in endoplasmic reticulum;ko03015//mRNA surveillance pathway	Genetic Information Processing	Folding, sorting and degradation;Translation	-5.9413	2.21266e-08	9.98444e-09	K14026//SEL1 protein+ko04141//Protein processing in endoplasmic reticulum;K14325//RNA-binding protein with serine-rich domain 1+ko03015//mRNA surveillance pathway+ko03013//RNA transport;K14325//RNA-binding protein with serine-rich domain 1+ko03015//mRNA surveillance pathway+ko03013//RNA transport;K14026//SEL1 protein+ko04141//Protein processing in endoplasmic reticulum	Sel1 repeat		sel1 domain protein repeat-containing protein [Chrysochromulina sp. CCMP291]	[MOT] KOG1550 Extracellular protein SEL-1 and related proteins	ERAD-associated E3 ubiquitin-protein ligase component HRD3 OS=Oryza sativa subsp. japonica GN=HRD3 PE=2 SV=1
Unigene57672_All	1159	ko04141//Protein processing in endoplasmic reticulum;ko04144//Endocytosis;ko03040//Spliceosome	Genetic Information Processing;Cellular Processes	Transcription;Folding, sorting and degradation;Transport and catabolism	-6.0788	7.07533e-17	2.02439e-17	K03283//heat shock 70kDa protein 1/2/6/8+ko03040//Spliceosome+ko04144//Endocytosis+ko04141//Protein processing in endoplasmic reticulum;K22020//mucin-19;K03283//heat shock 70kDa protein 1/2/6/8+ko03040//Spliceosome+ko04144//Endocytosis+ko04141//Protein processing in endoplasmic reticulum	MreB/Mbl protein		Rod shape determining protein (chromatophore) [Paulinella chromatophora] >ACB42894.1 Rod shape determining protein (chromatophore) [Paulinella chromatophora]	[O] KOG0101 Molecular chaperones HSP70/HSC70, HSP70 superfamily	Chaperone protein dnaK OS=Diacronema lutheri GN=dnaK PE=3 SV=1	GO:0000902//cell morphogenesis;GO:0009536//plastid
Unigene46732_All	2629	ko03013//RNA transport;ko03015//mRNA surveillance pathway;ko04141//Protein processing in endoplasmic reticulum	Genetic Information Processing	Folding, sorting and degradation;Translation	-6.10049	1.12585e-64	1.25876e-65	K17987//next to BRCA1 gene 1 protein;K14325//RNA-binding protein with serine-rich domain 1+ko03015//mRNA surveillance pathway+ko03013//RNA transport;K14325//RNA-binding protein with serine-rich domain 1+ko03015//mRNA surveillance pathway+ko03013//RNA transport;K14325//RNA-binding protein with serine-rich domain 1+ko03015//mRNA surveillance pathway+ko03013//RNA transport;K08653//membrane-bound tra…	Subtilase family		hypothetical protein BU14_0415s0013 [Porphyra umbilicalis]	[O] KOG1153 Subtilisin-related protease/Vacuolar protease B		GO:0004252//serine-type endopeptidase activity
CL8072.Contig1_All	1339	ko04141//Protein processing in endoplasmic reticulum	Genetic Information Processing	Folding, sorting and degradation	-6.1446	1.98064e-09	8.27104e-10	K08653//membrane-bound transcription factor site-1 protease [EC:3.4.21.112]+ko04141//Protein processing in endoplasmic reticulum;K08653//membrane-bound transcription factor site-1 protease [EC:3.4.21.112]+ko04141//Protein processing in endoplasmic reticulum;K08653//membrane-bound transcription factor site-1 protease [EC:3.4.21.112]+ko04141//Protein processing in endoplasmic reticulum;K08653//memb…	Subtilase family		Thermitase [Symbiodinium microadriaticum]	[O] KOG1153 Subtilisin-related protease/Vacuolar protease B	Subtilisin-like protease SBT4.12 OS=Arabidopsis thaliana GN=SBT4.12 PE=2 SV=1
Unigene24075_All	2070	ko03013//RNA transport;ko04141//Protein processing in endoplasmic reticulum;ko01110//Biosynthesis of secondary metabolites;ko00940//Phenylpropanoid biosynthesis;ko01100//Metabolic pathways;ko03015//mRNA surveillance pathway	Metabolism;Genetic Information Processing	Global and overview maps;Folding, sorting and degradation;Biosynthesis of other secondary metabolites;Translation	-6.6259	4.40658e-115	3.23399e-116	K14007//protein transport protein SEC24+ko04141//Protein processing in endoplasmic reticulum;K13171//serine/arginine repetitive matrix protein 1+ko03015//mRNA surveillance pathway+ko03013//RNA transport;K00430//peroxidase [EC:1.11.1.7]+ko01100//Metabolic pathways+ko01110//Biosynthesis of secondary metabolites+ko00940//Phenylpropanoid biosynthesis;K14325//RNA-binding protein with serine-rich domai…	Ornithine cyclodeaminase/mu-crystallin family		predicted protein [Phaeodactylum tricornutum CCAP 1055/1] >EEC48235.1 predicted protein [Phaeodactylum tricornutum CCAP 1055/1]	[W] KOG3544 Collagens (type IV and type XIII), and related proteins		GO:0016639//oxidoreductase activity, acting on the CH-NH2 group of donors, NAD or NADP as acceptor;GO:0005737//cytoplasm;GO:0008473//ornithine cyclodeaminase activity
Unigene43205_All	1719	ko04141//Protein processing in endoplasmic reticulum;ko03015//mRNA surveillance pathway;ko03013//RNA transport	Genetic Information Processing	Translation;Folding, sorting and degradation	-7.42672	7.51529e-20	1.91598e-20	K22020//mucin-19;K14007//protein transport protein SEC24+ko04141//Protein processing in endoplasmic reticulum;K02184//formin 2;K14325//RNA-binding protein with serine-rich domain 1+ko03015//mRNA surveillance pathway+ko03013//RNA transport;K14325//RNA-binding protein with serine-rich domain 1+ko03015//mRNA surveillance pathway+ko03013//RNA transport	Phage integrase family		hypothetical protein BU14_0066s0031 [Porphyra umbilicalis]	[W] KOG3544 Collagens (type IV and type XIII), and related proteins	Formin-like protein 14 OS=Arabidopsis thaliana GN=FH14 PE=3 SV=3	GO:0015074//DNA integration;GO:0003677//DNA binding;GO:0006310//DNA recombination
Unigene85852_All	4388	ko03013//RNA transport;ko03060//Protein export;ko04145//Phagosome;ko04141//Protein processing in endoplasmic reticulum	Genetic Information Processing;Cellular Processes	Translation;Transport and catabolism;Folding, sorting and degradation	-9.38313	9.31514e-60	1.10761e-60	K22020//mucin-19;K10956//protein transport protein SEC61 subunit alpha+ko04145//Phagosome+ko04141//Protein processing in endoplasmic reticulum+ko03060//Protein export;K14306//nuclear pore complex protein Nup62+ko03013//RNA transport	IPT/TIG domain		protocadherin Fat-like protein [Phytophthora infestans T30-4] >EEY56445.1 protocadherin Fat-like protein [Phytophthora infestans T30-4]	[AR] KOG2146 Splicing coactivator SRm160/300, subunit SRm160 (contains PWI domain)	Protein TIC 214 OS=Cucumis sativus GN=TIC214 PE=3 SV=2	GO:0007156//homophilic cell adhesion via plasma membrane adhesion molecules;GO:0005509//calcium ion binding;GO:0016021//integral component of membrane

## Sheet: Ribosome biogenesis
Supplementary Table 7:	Differentially expressed genes involved in protein processing in ribosome biogenesis metabolism
Gene ID	Length	Pathway Name	Level 1	Level 2	log2(He_1000/He_400)	Qvalue(He_400-vs-He_1000)	Pvalue(He_400-vs-He_1000)	Kegg Orthology	Pfam	Nt	Nr	Kog	Swissprot	GO
Unigene20367_All	738	ko03008//Ribosome biogenesis in eukaryotes	Genetic Information Processing	Translation	4.21352	2.66322e-05	1.61923e-05	K14544//U3 small nucleolar RNA-associated protein 22+ko03008//Ribosome biogenesis in eukaryotes	Phosphatidylinositol 3- and 4-kinase		predicted protein, partial [Thalassiosira pseudonana CCMP1335] >EED88882.1 predicted protein, partial [Thalassiosira pseudonana CCMP1335]	[T] KOG2381 Phosphatidylinositol 4-kinase	Phosphatidylinositol 4-kinase gamma 4 OS=Arabidopsis thaliana GN=PI4KG4 PE=1 SV=1	GO:0016301//kinase activity
Unigene3887_All	3127	ko03008//Ribosome biogenesis in eukaryotes	Genetic Information Processing	Translation	3.63701	2.63399e-86	2.38604e-87	K14564//nucleolar protein 56+ko03008//Ribosome biogenesis in eukaryotes;K14564//nucleolar protein 56+ko03008//Ribosome biogenesis in eukaryotes;K14564//nucleolar protein 56+ko03008//Ribosome biogenesis in eukaryotes;K14564//nucleolar protein 56+ko03008//Ribosome biogenesis in eukaryotes;K14564//nucleolar protein 56+ko03008//Ribosome biogenesis in eukaryotes	snoRNA binding domain, fibrillarin	XM_012352921.1 Saprolegnia parasitica CBS 223.65 hypothetical protein mRNA	hypothetical protein PHYSODRAFT_482921, partial [Phytophthora sojae] >EGZ23723.1 hypothetical protein PHYSODRAFT_482921, partial [Phytophthora sojae]	[AJ] KOG2573 Ribosome biogenesis protein - Nop56p/Sik1p	Probable nucleolar protein 5-1 OS=Arabidopsis thaliana GN=NOP5-1 PE=1 SV=2	GO:0000154//rRNA modification;GO:0030515//snoRNA binding;GO:0032040//small-subunit processome;GO:0031428//box C/D snoRNP complex
Unigene4817_All	2705	ko03008//Ribosome biogenesis in eukaryotes	Genetic Information Processing	Translation	2.62287	8.41228e-91	7.35305e-92	K14564//nucleolar protein 56+ko03008//Ribosome biogenesis in eukaryotes;K14564//nucleolar protein 56+ko03008//Ribosome biogenesis in eukaryotes;K14564//nucleolar protein 56+ko03008//Ribosome biogenesis in eukaryotes;K14564//nucleolar protein 56+ko03008//Ribosome biogenesis in eukaryotes;K14564//nucleolar protein 56+ko03008//Ribosome biogenesis in eukaryotes	snoRNA binding domain, fibrillarin	XM_012352921.1 Saprolegnia parasitica CBS 223.65 hypothetical protein mRNA	hypothetical protein PHYSODRAFT_482921, partial [Phytophthora sojae] >EGZ23723.1 hypothetical protein PHYSODRAFT_482921, partial [Phytophthora sojae]	[AJ] KOG2573 Ribosome biogenesis protein - Nop56p/Sik1p	Probable nucleolar protein 5-1 OS=Arabidopsis thaliana GN=NOP5-1 PE=1 SV=2	GO:0000154//rRNA modification;GO:0030515//snoRNA binding;GO:0032040//small-subunit processome;GO:0031428//box C/D snoRNP complex
Unigene6512_All	4334	ko03008//Ribosome biogenesis in eukaryotes	Genetic Information Processing	Translation	2.53891	8.56127e-23	1.98481e-23	K14564//nucleolar protein 56+ko03008//Ribosome biogenesis in eukaryotes;K14564//nucleolar protein 56+ko03008//Ribosome biogenesis in eukaryotes;K14564//nucleolar protein 56+ko03008//Ribosome biogenesis in eukaryotes;K14564//nucleolar protein 56+ko03008//Ribosome biogenesis in eukaryotes;K14564//nucleolar protein 56+ko03008//Ribosome biogenesis in eukaryotes	snoRNA binding domain, fibrillarin	XM_012352921.1 Saprolegnia parasitica CBS 223.65 hypothetical protein mRNA	hypothetical protein PHYSODRAFT_482921, partial [Phytophthora sojae] >EGZ23723.1 hypothetical protein PHYSODRAFT_482921, partial [Phytophthora sojae]	[AJ] KOG2573 Ribosome biogenesis protein - Nop56p/Sik1p	Probable nucleolar protein 5-1 OS=Arabidopsis thaliana GN=NOP5-1 PE=1 SV=2	GO:0000154//rRNA modification;GO:0030515//snoRNA binding;GO:0032040//small-subunit processome;GO:0031428//box C/D snoRNP complex
Unigene38153_All	1837	ko04712//Circadian rhythm - plant;ko03013//RNA transport;ko03008//Ribosome biogenesis in eukaryotes	Genetic Information Processing;Organismal Systems	Translation;Environmental adaptation	2.52844	0	0	K03539//ribonuclease P/MRP protein subunit RPP1 [EC:3.1.26.5]+ko03013//RNA transport+ko03008//Ribosome biogenesis in eukaryotes;K03539//ribonuclease P/MRP protein subunit RPP1 [EC:3.1.26.5]+ko03013//RNA transport+ko03008//Ribosome biogenesis in eukaryotes;K03539//ribonuclease P/MRP protein subunit RPP1 [EC:3.1.26.5]+ko03013//RNA transport+ko03008//Ribosome biogenesis in eukaryotes;K03539//ribonuc…	CCT motif		CCT domain protein [Nannochloropsis gaditana]	[K] KOG1601 GATA-4/5/6 transcription factors	Zinc finger protein CONSTANS-LIKE 16 OS=Arabidopsis thaliana GN=COL16 PE=1 SV=2
CL2215.Contig2_All	893	ko03008//Ribosome biogenesis in eukaryotes	Genetic Information Processing	Translation	2.20879	1.6888e-17	4.69509e-18	K11128//H/ACA ribonucleoprotein complex subunit 1+ko03008//Ribosome biogenesis in eukaryotes;K11128//H/ACA ribonucleoprotein complex subunit 1+ko03008//Ribosome biogenesis in eukaryotes	Gar1/Naf1 RNA binding region		conserved unknown protein (Partial), partial [Ectocarpus siliculosus]	[J] KOG3262 H/ACA small nucleolar RNP component GAR1	H/ACA ribonucleoprotein complex subunit 1-like protein 2 OS=Arabidopsis thaliana GN=At5g18180 PE=2 SV=1	GO:0003723//RNA binding;GO:0034513//box H/ACA snoRNA binding;GO:0006364//rRNA processing;GO:0001522//pseudouridine synthesis;GO:0019013//viral nucleocapsid;GO:0000454//snoRNA guided rRNA pseudouridine synthesis;GO:0031429//box H/ACA snoRNP complex
CL5490.Contig3_All	2290	ko03008//Ribosome biogenesis in eukaryotes	Genetic Information Processing	Translation	2.15104	2.36547e-62	2.71322e-63	K14565//nucleolar protein 58+ko03008//Ribosome biogenesis in eukaryotes;K14565//nucleolar protein 58+ko03008//Ribosome biogenesis in eukaryotes	snoRNA binding domain, fibrillarin	XM_013042842.1 Blastocystis hominis mRNA	conserved unknown protein [Ectocarpus siliculosus]	[AJ] KOG2572 Ribosome biogenesis protein - Nop58p/Nop5p	Probable nucleolar protein 5-1 OS=Arabidopsis thaliana GN=NOP5-1 PE=1 SV=2	GO:0000154//rRNA modification;GO:0030515//snoRNA binding;GO:0032040//small-subunit processome;GO:0031428//box C/D snoRNP complex
CL1878.Contig5_All	2586	ko03008//Ribosome biogenesis in eukaryotes	Genetic Information Processing	Translation	2.13892	5.77866e-41	8.94334e-42	K11131//H/ACA ribonucleoprotein complex subunit 4 [EC:5.4.99.-]+ko03008//Ribosome biogenesis in eukaryotes;K11131//H/ACA ribonucleoprotein complex subunit 4 [EC:5.4.99.-]+ko03008//Ribosome biogenesis in eukaryotes;K11131//H/ACA ribonucleoprotein complex subunit 4 [EC:5.4.99.-]+ko03008//Ribosome biogenesis in eukaryotes;K11131//H/ACA ribonucleoprotein complex subunit 4 [EC:5.4.99.-]+ko03008//Ribos…	DKCLD (NUC011) domain	XM_009037109.1 Aureococcus anophagefferens hypothetical protein partial mRNA	h aca ribonucleoprotein complex subunit 4 [Nannochloropsis gaditana]	[J] KOG2529 Pseudouridine synthase	H/ACA ribonucleoprotein complex subunit 4 OS=Arabidopsis thaliana GN=CBF5 PE=1 SV=1	GO:0006396//RNA processing;GO:0003723//RNA binding;GO:0030529//intracellular ribonucleoprotein complex;GO:0001522//pseudouridine synthesis;GO:0009982//pseudouridine synthase activity;GO:0019013//viral nucleocapsid
CL4023.Contig3_All	3422	ko03008//Ribosome biogenesis in eukaryotes	Genetic Information Processing	Translation	2.02096	0.000480121	0.000349783	K14571//ribosome biogenesis ATPase+ko03008//Ribosome biogenesis in eukaryotes;K14571//ribosome biogenesis ATPase+ko03008//Ribosome biogenesis in eukaryotes	ATPase family associated with various cellular activities (AAA)		predicted protein [Thalassiosira pseudonana CCMP1335] >EED96593.1 predicted protein [Thalassiosira pseudonana CCMP1335]	[O] KOG0732 AAA+-type ATPase containing the bromodomain		GO:0005524//ATP binding
Unigene360_All	1689	ko03008//Ribosome biogenesis in eukaryotes	Genetic Information Processing	Translation	2.01047	4.81067e-79	4.62969e-80	K14537//nuclear GTP-binding protein+ko03008//Ribosome biogenesis in eukaryotes;K14537//nuclear GTP-binding protein+ko03008//Ribosome biogenesis in eukaryotes;K14537//nuclear GTP-binding protein+ko03008//Ribosome biogenesis in eukaryotes;K14537//nuclear GTP-binding protein+ko03008//Ribosome biogenesis in eukaryotes;K14537//nuclear GTP-binding protein+ko03008//Ribosome biogenesis in eukaryotes	NGP1NT (NUC091) domain	XM_005789041.1 Emiliania huxleyi CCMP1516 hypothetical protein partial mRNA	nucleolar gtp-binding protein 2 [Nannochloropsis gaditana]	[R] KOG2423 Nucleolar GTPase	Nuclear/nucleolar GTPase 2 OS=Oryza sativa subsp. japonica GN=NUG2 PE=1 SV=1	GO:0005730//nucleolus;GO:0005525//GTP binding
CL2757.Contig2_All	733	ko03013//RNA transport;ko03008//Ribosome biogenesis in eukaryotes	Genetic Information Processing	Translation	1.9728	1.15185e-16	3.31907e-17	K03538//ribonuclease P protein subunit POP4 [EC:3.1.26.5]+ko03013//RNA transport+ko03008//Ribosome biogenesis in eukaryotes;K03538//ribonuclease P protein subunit POP4 [EC:3.1.26.5]+ko03013//RNA transport+ko03008//Ribosome biogenesis in eukaryotes;K03538//ribonuclease P protein subunit POP4 [EC:3.1.26.5]+ko03013//RNA transport+ko03008//Ribosome biogenesis in eukaryotes;K03538//ribonuclease P prot…	Domain of unknown function UPF0086		hypothetical protein CDL15_Pgr024751 [Punica granatum]	[A] KOG4046 RNase MRP and P, subunit POP4/p29		GO:0000172//ribonuclease MRP complex;GO:0003723//RNA binding;GO:0005655//nucleolar ribonuclease P complex;GO:0006379//mRNA cleavage;GO:0006364//rRNA processing;GO:0004540//ribonuclease activity;GO:0008033//tRNA processing
CL4023.Contig5_All	3491	ko03008//Ribosome biogenesis in eukaryotes	Genetic Information Processing	Translation	1.8976	3.70704e-09	1.57913e-09	K14571//ribosome biogenesis ATPase+ko03008//Ribosome biogenesis in eukaryotes;K14571//ribosome biogenesis ATPase+ko03008//Ribosome biogenesis in eukaryotes	ATPase family associated with various cellular activities (AAA)		predicted protein [Thalassiosira pseudonana CCMP1335] >EED96593.1 predicted protein [Thalassiosira pseudonana CCMP1335]	[O] KOG0732 AAA+-type ATPase containing the bromodomain		GO:0005524//ATP binding
CL10667.Contig5_All	1190	ko03008//Ribosome biogenesis in eukaryotes	Genetic Information Processing	Translation	1.88574	1.15635e-36	1.9394e-37	K14564//nucleolar protein 56+ko03008//Ribosome biogenesis in eukaryotes;K14564//nucleolar protein 56+ko03008//Ribosome biogenesis in eukaryotes;K14564//nucleolar protein 56+ko03008//Ribosome biogenesis in eukaryotes;K14564//nucleolar protein 56+ko03008//Ribosome biogenesis in eukaryotes;K14564//nucleolar protein 56+ko03008//Ribosome biogenesis in eukaryotes			PREDICTED: nucleolar protein 56-like [Brassica napus]	[AJ] KOG2573 Ribosome biogenesis protein - Nop56p/Sik1p	Probable nucleolar protein 5-2 OS=Arabidopsis thaliana GN=NOP5-2 PE=1 SV=1
Unigene37407_All	1481	ko03008//Ribosome biogenesis in eukaryotes	Genetic Information Processing	Translation	1.76345	2.11908e-18	5.69784e-19	K11131//H/ACA ribonucleoprotein complex subunit 4 [EC:5.4.99.-]+ko03008//Ribosome biogenesis in eukaryotes;K11131//H/ACA ribonucleoprotein complex subunit 4 [EC:5.4.99.-]+ko03008//Ribosome biogenesis in eukaryotes;K11131//H/ACA ribonucleoprotein complex subunit 4 [EC:5.4.99.-]+ko03008//Ribosome biogenesis in eukaryotes;K11131//H/ACA ribonucleoprotein complex subunit 4 [EC:5.4.99.-]+ko03008//Ribos…			h aca ribonucleoprotein complex subunit 4 [Nannochloropsis gaditana]	[J] KOG2529 Pseudouridine synthase	H/ACA ribonucleoprotein complex subunit 4 OS=Arabidopsis thaliana GN=CBF5 PE=1 SV=1	GO:0006396//RNA processing;GO:0003723//RNA binding;GO:0030529//intracellular ribonucleoprotein complex;GO:0001522//pseudouridine synthesis;GO:0009982//pseudouridine synthase activity;GO:0019013//viral nucleocapsid
CL5490.Contig5_All	2259	ko03008//Ribosome biogenesis in eukaryotes	Genetic Information Processing	Translation	1.75882	0	0	K14565//nucleolar protein 58+ko03008//Ribosome biogenesis in eukaryotes;K14565//nucleolar protein 58+ko03008//Ribosome biogenesis in eukaryotes	snoRNA binding domain, fibrillarin	XM_013042842.1 Blastocystis hominis mRNA	conserved unknown protein [Ectocarpus siliculosus]	[AJ] KOG2572 Ribosome biogenesis protein - Nop58p/Nop5p	Probable nucleolar protein 5-1 OS=Arabidopsis thaliana GN=NOP5-1 PE=1 SV=2	GO:0000154//rRNA modification;GO:0030515//snoRNA binding;GO:0032040//small-subunit processome;GO:0031428//box C/D snoRNP complex
Unigene35885_All	495	ko03008//Ribosome biogenesis in eukaryotes	Genetic Information Processing	Translation	1.75409	0.000150889	0.000101275	K14539//large subunit GTPase 1 [EC:3.6.1.-]+ko03008//Ribosome biogenesis in eukaryotes;K14539//large subunit GTPase 1 [EC:3.6.1.-]+ko03008//Ribosome biogenesis in eukaryotes;K14539//large subunit GTPase 1 [EC:3.6.1.-]+ko03008//Ribosome biogenesis in eukaryotes			hypothetical protein SDRG_01770 [Saprolegnia diclina VS20] >EQC40695.1 hypothetical protein SDRG_01770 [Saprolegnia diclina VS20]	[R] KOG1424 Predicted GTP-binding protein MMR1	GTPase LSG1-2 OS=Arabidopsis thaliana GN=LSG1-2 PE=1 SV=1	GO:0005525//GTP binding
Unigene43972_All	941	ko03008//Ribosome biogenesis in eukaryotes;ko03040//Spliceosome	Genetic Information Processing	Transcription;Translation	1.7491	0	0	K18626//trichohyalin;K11984//U4/U6.U5 tri-snRNP-associated protein 1+ko03040//Spliceosome;K11984//U4/U6.U5 tri-snRNP-associated protein 1+ko03040//Spliceosome;K11131//H/ACA ribonucleoprotein complex subunit 4 [EC:5.4.99.-]+ko03008//Ribosome biogenesis in eukaryotes;K11131//H/ACA ribonucleoprotein complex subunit 4 [EC:5.4.99.-]+ko03008//Ribosome biogenesis in eukaryotes	C-terminal domain of the ECSIT protein		predicted protein [Physcomitrella patens] >EDQ74936.1 predicted protein [Physcomitrella patens]	[W] LSE0516 C Uncharacterized protein, contains major sperm protein (MSP) domain	H/ACA ribonucleoprotein complex subunit 4 OS=Arabidopsis thaliana GN=CBF5 PE=1 SV=1
CL1878.Contig6_All	2357	ko03008//Ribosome biogenesis in eukaryotes	Genetic Information Processing	Translation	1.7429	8.4757e-16	2.52973e-16	K11131//H/ACA ribonucleoprotein complex subunit 4 [EC:5.4.99.-]+ko03008//Ribosome biogenesis in eukaryotes;K11131//H/ACA ribonucleoprotein complex subunit 4 [EC:5.4.99.-]+ko03008//Ribosome biogenesis in eukaryotes;K11131//H/ACA ribonucleoprotein complex subunit 4 [EC:5.4.99.-]+ko03008//Ribosome biogenesis in eukaryotes;K11131//H/ACA ribonucleoprotein complex subunit 4 [EC:5.4.99.-]+ko03008//Ribos…	DKCLD (NUC011) domain	XM_009037109.1 Aureococcus anophagefferens hypothetical protein partial mRNA	h aca ribonucleoprotein complex subunit 4 [Nannochloropsis gaditana]	[J] KOG2529 Pseudouridine synthase	H/ACA ribonucleoprotein complex subunit 4 OS=Arabidopsis thaliana GN=CBF5 PE=1 SV=1	GO:0006396//RNA processing;GO:0003723//RNA binding;GO:0030529//intracellular ribonucleoprotein complex;GO:0001522//pseudouridine synthesis;GO:0009982//pseudouridine synthase activity;GO:0019013//viral nucleocapsid
CL9880.Contig1_All	739	ko03008//Ribosome biogenesis in eukaryotes	Genetic Information Processing	Translation	1.74013	1.00162e-200	4.7804e-202	K11130//H/ACA ribonucleoprotein complex subunit 3+ko03008//Ribosome biogenesis in eukaryotes;K11130//H/ACA ribonucleoprotein complex subunit 3+ko03008//Ribosome biogenesis in eukaryotes;K11130//H/ACA ribonucleoprotein complex subunit 3+ko03008//Ribosome biogenesis in eukaryotes			H/ACA ribonucleoprotein complex subunit 3 [Phytophthora megakarya]	[A] KOG3503 H/ACA snoRNP complex, subunit NOP10	H/ACA ribonucleoprotein complex subunit 3-like protein OS=Arabidopsis thaliana GN=At2g20490 PE=3 SV=2	GO:0030515//snoRNA binding;GO:0072589//box H/ACA scaRNP complex;GO:0034513//box H/ACA snoRNA binding;GO:0001522//pseudouridine synthesis;GO:0090661//box H/ACA telomerase RNP complex;GO:0031429//box H/ACA snoRNP complex;GO:0031120//snRNA pseudouridine synthesis;GO:1904874//positive regulation of telomerase RNA localization to Cajal body;GO:0042254//ribosome biogenesis;GO:0030529//intracellular rib…
CL9880.Contig2_All	746	ko03008//Ribosome biogenesis in eukaryotes	Genetic Information Processing	Translation	1.72807	3.3377e-301	1.1412e-302	K11130//H/ACA ribonucleoprotein complex subunit 3+ko03008//Ribosome biogenesis in eukaryotes;K11130//H/ACA ribonucleoprotein complex subunit 3+ko03008//Ribosome biogenesis in eukaryotes;K11130//H/ACA ribonucleoprotein complex subunit 3+ko03008//Ribosome biogenesis in eukaryotes			H/ACA ribonucleoprotein complex subunit 3 [Phytophthora megakarya]	[A] KOG3503 H/ACA snoRNP complex, subunit NOP10	H/ACA ribonucleoprotein complex subunit 3-like protein OS=Arabidopsis thaliana GN=At2g20490 PE=3 SV=2	GO:0030515//snoRNA binding;GO:0072589//box H/ACA scaRNP complex;GO:0034513//box H/ACA snoRNA binding;GO:0001522//pseudouridine synthesis;GO:0090661//box H/ACA telomerase RNP complex;GO:0031429//box H/ACA snoRNP complex;GO:0031120//snRNA pseudouridine synthesis;GO:1904874//positive regulation of telomerase RNA localization to Cajal body;GO:0042254//ribosome biogenesis;GO:0030529//intracellular rib…
CL2689.Contig1_All	1084	ko03008//Ribosome biogenesis in eukaryotes	Genetic Information Processing	Translation	1.70696	1.44958e-139	9.34402e-141	K14560//U3 small nucleolar ribonucleoprotein protein IMP3+ko03008//Ribosome biogenesis in eukaryotes	S4 domain	XM_020389625.1 PREDICTED: Asparagus officinalis U3 small nucleolar ribonucleoprotein protein IMP3 (LOC109823343), mRNA	U3 small nucleolar ribonucleoprotein IMP3 [Nannochloropsis gaditana CCMP526] >EKU22604.1 U3 small nucleolar ribonucleoprotein IMP3 [Nannochloropsis gaditana CCMP526] >EWM23552.1 Ribosomal protein S4/S9 [Nannochloropsis gaditana]	[A] KOG4655 U3 small nucleolar ribonucleoprotein (snoRNP) component		GO:0030515//snoRNA binding;GO:0032040//small-subunit processome;GO:0034457//Mpp10 complex;GO:0030529//intracellular ribonucleoprotein complex;GO:0006364//rRNA processing;GO:0019013//viral nucleocapsid;GO:0019843//rRNA binding
Unigene41966_All	624	ko03008//Ribosome biogenesis in eukaryotes;ko03013//RNA transport	Genetic Information Processing	Translation	1.69641	1.51117e-52	1.95885e-53	K03243//translation initiation factor 5B+ko03013//RNA transport;K11131//H/ACA ribonucleoprotein complex subunit 4 [EC:5.4.99.-]+ko03008//Ribosome biogenesis in eukaryotes;K13118//protein DGCR14	Signal recognition particle, alpha subunit, N-terminal		hypothetical protein AK812_SmicGene22574 [Symbiodinium microadriaticum]	[J] KOG2529 Pseudouridine synthase	H/ACA ribonucleoprotein complex subunit 4 OS=Arabidopsis thaliana GN=CBF5 PE=1 SV=1
Unigene38513_All	970	ko03008//Ribosome biogenesis in eukaryotes	Genetic Information Processing	Translation	1.69456	0	0	K17046//protein DEK;K17046//protein DEK;K17046//protein DEK;K11131//H/ACA ribonucleoprotein complex subunit 4 [EC:5.4.99.-]+ko03008//Ribosome biogenesis in eukaryotes;K17046//protein DEK			PREDICTED: dentin matrix acidic phosphoprotein 1-like [Camelina sativa]	[R] LSE0089 H Neurofilament	Protein Ycf2 OS=Oenothera elata subsp. hookeri GN=ycf2-A PE=3 SV=2	GO:0016021//integral component of membrane
CL10667.Contig4_All	1921	ko03008//Ribosome biogenesis in eukaryotes	Genetic Information Processing	Translation	1.68389	1.22571e-271	4.60006e-273	K14564//nucleolar protein 56+ko03008//Ribosome biogenesis in eukaryotes;K14564//nucleolar protein 56+ko03008//Ribosome biogenesis in eukaryotes;K14564//nucleolar protein 56+ko03008//Ribosome biogenesis in eukaryotes;K14564//nucleolar protein 56+ko03008//Ribosome biogenesis in eukaryotes;K14564//nucleolar protein 56+ko03008//Ribosome biogenesis in eukaryotes	snoRNA binding domain, fibrillarin	XM_012352921.1 Saprolegnia parasitica CBS 223.65 hypothetical protein mRNA	conserved unknown protein [Ectocarpus siliculosus]	[AJ] KOG2573 Ribosome biogenesis protein - Nop56p/Sik1p	DEAD-box ATP-dependent RNA helicase 27 OS=Arabidopsis thaliana GN=RH27 PE=2 SV=2	GO:0000154//rRNA modification;GO:0030515//snoRNA binding;GO:0032040//small-subunit processome;GO:0031428//box C/D snoRNP complex
CL3831.Contig2_All	1210	ko03008//Ribosome biogenesis in eukaryotes	Genetic Information Processing	Translation	1.68279	3.51085e-06	1.93215e-06	K11131//H/ACA ribonucleoprotein complex subunit 4 [EC:5.4.99.-]+ko03008//Ribosome biogenesis in eukaryotes;K11131//H/ACA ribonucleoprotein complex subunit 4 [EC:5.4.99.-]+ko03008//Ribosome biogenesis in eukaryotes;K11131//H/ACA ribonucleoprotein complex subunit 4 [EC:5.4.99.-]+ko03008//Ribosome biogenesis in eukaryotes;K09566//peptidyl-prolyl isomerase G (cyclophilin G) [EC:5.2.1.8]	Zn-finger in Ran binding protein and others	KP248280.1 Eucommia ulmoides microsatellite EU-159 sequence	myb-like protein X [Momordica charantia]	[J] KOG2529 Pseudouridine synthase	H/ACA ribonucleoprotein complex subunit 4 OS=Arabidopsis thaliana GN=CBF5 PE=1 SV=1
Unigene25616_All	1534	ko03008//Ribosome biogenesis in eukaryotes	Genetic Information Processing	Translation	1.63434	7.85994e-08	3.70339e-08	K11131//H/ACA ribonucleoprotein complex subunit 4 [EC:5.4.99.-]+ko03008//Ribosome biogenesis in eukaryotes;K11131//H/ACA ribonucleoprotein complex subunit 4 [EC:5.4.99.-]+ko03008//Ribosome biogenesis in eukaryotes;K11131//H/ACA ribonucleoprotein complex subunit 4 [EC:5.4.99.-]+ko03008//Ribosome biogenesis in eukaryotes;K11131//H/ACA ribonucleoprotein complex subunit 4 [EC:5.4.99.-]+ko03008//Ribos…	DKCLD (NUC011) domain	XM_009037109.1 Aureococcus anophagefferens hypothetical protein partial mRNA	h aca ribonucleoprotein complex subunit 4 [Nannochloropsis gaditana]	[J] KOG2529 Pseudouridine synthase	H/ACA ribonucleoprotein complex subunit 4 OS=Arabidopsis thaliana GN=CBF5 PE=1 SV=1	GO:0006396//RNA processing;GO:0003723//RNA binding;GO:0030529//intracellular ribonucleoprotein complex;GO:0001522//pseudouridine synthesis;GO:0009982//pseudouridine synthase activity;GO:0019013//viral nucleocapsid
CL5474.Contig2_All	1454	ko03008//Ribosome biogenesis in eukaryotes	Genetic Information Processing	Translation	1.62861	2.91307e-54	3.70047e-55	K14561//U3 small nucleolar ribonucleoprotein protein IMP4+ko03008//Ribosome biogenesis in eukaryotes;K14561//U3 small nucleolar ribonucleoprotein protein IMP4+ko03008//Ribosome biogenesis in eukaryotes;K14561//U3 small nucleolar ribonucleoprotein protein IMP4+ko03008//Ribosome biogenesis in eukaryotes;K14561//U3 small nucleolar ribonucleoprotein protein IMP4+ko03008//Ribosome biogenesis in eukary…	Brix domain	XM_009520622.1 Phytophthora sojae hypothetical protein partial mRNA	U3 small nucleolar ribonucleoprotein IMP4 [Phytophthora megakarya]	[A] KOG2781 U3 small nucleolar ribonucleoprotein (snoRNP) component		GO:0030515//snoRNA binding;GO:0032040//small-subunit processome;GO:0034457//Mpp10 complex;GO:0042134//rRNA primary transcript binding;GO:0006364//rRNA processing;GO:0019013//viral nucleocapsid
Unigene329_All	2151	ko03008//Ribosome biogenesis in eukaryotes	Genetic Information Processing	Translation	1.6088	3.71023e-58	4.50416e-59	K02184//formin 2;K02184//formin 2;K19984//exocyst complex component 5;K14570//RNA exonuclease 1 [EC:3.1.-.-]+ko03008//Ribosome biogenesis in eukaryotes	Exonuclease		PREDICTED: basic proline-rich protein-like, partial [Oryza sativa Japonica Group]	[T] KOG1187 Serine/threonine protein kinase	Formin-like protein 3 OS=Oryza sativa subsp. japonica GN=FH3 PE=2 SV=2	GO:0046872//metal ion binding;GO:0003676//nucleic acid binding
Unigene25617_All	1691	ko03008//Ribosome biogenesis in eukaryotes	Genetic Information Processing	Translation	1.58715	2.59382e-24	5.76455e-25	K11131//H/ACA ribonucleoprotein complex subunit 4 [EC:5.4.99.-]+ko03008//Ribosome biogenesis in eukaryotes;K11131//H/ACA ribonucleoprotein complex subunit 4 [EC:5.4.99.-]+ko03008//Ribosome biogenesis in eukaryotes;K11131//H/ACA ribonucleoprotein complex subunit 4 [EC:5.4.99.-]+ko03008//Ribosome biogenesis in eukaryotes			hypothetical protein THAOC_32164 [Thalassiosira oceanica]	[J] KOG2529 Pseudouridine synthase	H/ACA ribonucleoprotein complex subunit 4 OS=Arabidopsis thaliana GN=CBF5 PE=1 SV=1	GO:0006396//RNA processing;GO:0003723//RNA binding;GO:1990481//mRNA pseudouridine synthesis;GO:0001522//pseudouridine synthesis;GO:0031429//box H/ACA snoRNP complex;GO:0031120//snRNA pseudouridine synthesis;GO:0000495//box H/ACA snoRNA 3'-end processing;GO:0031118//rRNA pseudouridine synthesis;GO:0009982//pseudouridine synthase activity
Unigene7723_All	3181	ko03008//Ribosome biogenesis in eukaryotes	Genetic Information Processing	Translation	1.55386	4.43463e-44	6.50291e-45	K14564//nucleolar protein 56+ko03008//Ribosome biogenesis in eukaryotes;K14564//nucleolar protein 56+ko03008//Ribosome biogenesis in eukaryotes;K14564//nucleolar protein 56+ko03008//Ribosome biogenesis in eukaryotes;K14564//nucleolar protein 56+ko03008//Ribosome biogenesis in eukaryotes;K14564//nucleolar protein 56+ko03008//Ribosome biogenesis in eukaryotes	snoRNA binding domain, fibrillarin	XM_012352921.1 Saprolegnia parasitica CBS 223.65 hypothetical protein mRNA	hypothetical protein PHYSODRAFT_482921, partial [Phytophthora sojae] >EGZ23723.1 hypothetical protein PHYSODRAFT_482921, partial [Phytophthora sojae]	[AJ] KOG2573 Ribosome biogenesis protein - Nop56p/Sik1p	Probable nucleolar protein 5-1 OS=Arabidopsis thaliana GN=NOP5-1 PE=1 SV=2	GO:0000154//rRNA modification;GO:0030515//snoRNA binding;GO:0032040//small-subunit processome;GO:0031428//box C/D snoRNP complex
CL3322.Contig2_All	581	ko03008//Ribosome biogenesis in eukaryotes	Genetic Information Processing	Translation	1.51977	6.21842e-08	2.90357e-08	K14521//N-acetyltransferase 10 [EC:2.3.1.-]+ko03008//Ribosome biogenesis in eukaryotes	Aldo/keto reductase family		aldo keto reductase family protein [Nannochloropsis gaditana]	[C] KOG1575 Voltage-gated shaker-like K+ channel, subunit beta/KCNAB		GO:0016491//oxidoreductase activity
Unigene10400_All	2772	ko03008//Ribosome biogenesis in eukaryotes	Genetic Information Processing	Translation	1.50408	6.82453e-142	4.34833e-143	K14564//nucleolar protein 56+ko03008//Ribosome biogenesis in eukaryotes;K14564//nucleolar protein 56+ko03008//Ribosome biogenesis in eukaryotes;K14564//nucleolar protein 56+ko03008//Ribosome biogenesis in eukaryotes;K14564//nucleolar protein 56+ko03008//Ribosome biogenesis in eukaryotes;K14564//nucleolar protein 56+ko03008//Ribosome biogenesis in eukaryotes	snoRNA binding domain, fibrillarin	XM_012352921.1 Saprolegnia parasitica CBS 223.65 hypothetical protein mRNA	hypothetical protein PHYSODRAFT_482921, partial [Phytophthora sojae] >EGZ23723.1 hypothetical protein PHYSODRAFT_482921, partial [Phytophthora sojae]	[AJ] KOG2573 Ribosome biogenesis protein - Nop56p/Sik1p	Probable nucleolar protein 5-1 OS=Arabidopsis thaliana GN=NOP5-1 PE=1 SV=2	GO:0000154//rRNA modification;GO:0030515//snoRNA binding;GO:0032040//small-subunit processome;GO:0031428//box C/D snoRNP complex
CL4023.Contig4_All	3657	ko03008//Ribosome biogenesis in eukaryotes	Genetic Information Processing	Translation	1.45964	8.27883e-16	2.46997e-16	K14571//ribosome biogenesis ATPase+ko03008//Ribosome biogenesis in eukaryotes;K14571//ribosome biogenesis ATPase+ko03008//Ribosome biogenesis in eukaryotes	ATPase family associated with various cellular activities (AAA)		predicted protein [Thalassiosira pseudonana CCMP1335] >EED96593.1 predicted protein [Thalassiosira pseudonana CCMP1335]			GO:0005524//ATP binding
Unigene22888_All	2640	ko03008//Ribosome biogenesis in eukaryotes	Genetic Information Processing	Translation	1.42764	7.77303e-187	3.93337e-188	K06943//nucleolar GTP-binding protein+ko03008//Ribosome biogenesis in eukaryotes	Nucleolar GTP-binding protein 1 (NOG1)	XM_012352292.1 Saprolegnia parasitica CBS 223.65 hypothetical protein mRNA	Nog1, nucleolar GTPase [Ectocarpus siliculosus]	[R] KOG1490 GTP-binding protein CRFG/NOG1 (ODN superfamily)	Nucleolar GTP-binding protein 1 OS=Arabidopsis thaliana GN=At1g50920 PE=2 SV=1	GO:0042254//ribosome biogenesis;GO:0005730//nucleolus;GO:0005525//GTP binding
Unigene76590_All	1662	ko03018//RNA degradation;ko03008//Ribosome biogenesis in eukaryotes	Genetic Information Processing	Translation;Folding, sorting and degradation	1.414	7.3866e-70	7.80397e-71	K12618//5'-3' exoribonuclease 1 [EC:3.1.13.-]+ko03018//RNA degradation+ko03008//Ribosome biogenesis in eukaryotes;K12618//5'-3' exoribonuclease 1 [EC:3.1.13.-]+ko03018//RNA degradation+ko03008//Ribosome biogenesis in eukaryotes;K12618//5'-3' exoribonuclease 1 [EC:3.1.13.-]+ko03018//RNA degradation+ko03008//Ribosome biogenesis in eukaryotes;K12618//5'-3' exoribonuclease 1 [EC:3.1.13.-]+ko03018//RN…	XRN 5'-3' exonuclease N-terminus	XM_005855406.1 Nannochloropsis gaditana CCMP526 5 -3 exoribonuclease partial mRNA	dhm exonuclease [Ectocarpus siliculosus]	[LA] KOG2044 5'-3' exonuclease HKE1/RAT1	5'-3' exoribonuclease 3 OS=Arabidopsis thaliana GN=XRN3 PE=1 SV=1	GO:0004527//exonuclease activity;GO:0003676//nucleic acid binding
CL1878.Contig8_All	2579	ko03008//Ribosome biogenesis in eukaryotes	Genetic Information Processing	Translation	1.39407	4.13298e-15	1.26922e-15	K11131//H/ACA ribonucleoprotein complex subunit 4 [EC:5.4.99.-]+ko03008//Ribosome biogenesis in eukaryotes;K11131//H/ACA ribonucleoprotein complex subunit 4 [EC:5.4.99.-]+ko03008//Ribosome biogenesis in eukaryotes;K11131//H/ACA ribonucleoprotein complex subunit 4 [EC:5.4.99.-]+ko03008//Ribosome biogenesis in eukaryotes;K11131//H/ACA ribonucleoprotein complex subunit 4 [EC:5.4.99.-]+ko03008//Ribos…	tRNA pseudouridylate synthase B C-terminal domain	XM_011399979.1 Auxenochlorella protothecoides Threonine-tRNA ligase partial mRNA	tRNA pseudouridine(55) synthase [Phytophthora parasitica P1569] >ETK80913.1 tRNA pseudouridine(55) synthase [Phytophthora parasitica] >ETL34329.1 tRNA pseudouridine(55) synthase [Phytophthora parasitica] >ETL87605.1 tRNA pseudouridine(55) synthase [Phytophthora parasitica] >ETM40814.1 tRNA pseudouridine(55) synthase [Phytophthora parasitica] >ETO69502.1 tRNA pseudouridine(55) synthase [Phytophtho…	[J] KOG2529 Pseudouridine synthase	H/ACA ribonucleoprotein complex subunit 4 OS=Arabidopsis thaliana GN=CBF5 PE=1 SV=1	GO:0006396//RNA processing;GO:0003723//RNA binding;GO:1990481//mRNA pseudouridine synthesis;GO:0001522//pseudouridine synthesis;GO:0031429//box H/ACA snoRNP complex;GO:0031120//snRNA pseudouridine synthesis;GO:0000495//box H/ACA snoRNA 3'-end processing;GO:0031118//rRNA pseudouridine synthesis;GO:0009982//pseudouridine synthase activity
Unigene37438_All	1314	ko03008//Ribosome biogenesis in eukaryotes;ko03013//RNA transport	Genetic Information Processing	Translation	1.37741	2.75141e-19	7.15292e-20	K03539//ribonuclease P/MRP protein subunit RPP1 [EC:3.1.26.5]+ko03013//RNA transport+ko03008//Ribosome biogenesis in eukaryotes;K03539//ribonuclease P/MRP protein subunit RPP1 [EC:3.1.26.5]+ko03013//RNA transport+ko03008//Ribosome biogenesis in eukaryotes;K03539//ribonuclease P/MRP protein subunit RPP1 [EC:3.1.26.5]+ko03013//RNA transport+ko03008//Ribosome biogenesis in eukaryotes;K03539//ribonuc…	RNase P subunit p30		PREDICTED: uncharacterized protein LOC107814819 [Nicotiana tabacum]	[J] KOG2363 Protein subunit of nuclear ribonuclease P (RNase P)		GO:0004540//ribonuclease activity;GO:0008033//tRNA processing
CL1878.Contig4_All	2234	ko03008//Ribosome biogenesis in eukaryotes	Genetic Information Processing	Translation	1.36183	1.09733e-12	3.76602e-13	K11131//H/ACA ribonucleoprotein complex subunit 4 [EC:5.4.99.-]+ko03008//Ribosome biogenesis in eukaryotes;K11131//H/ACA ribonucleoprotein complex subunit 4 [EC:5.4.99.-]+ko03008//Ribosome biogenesis in eukaryotes;K11131//H/ACA ribonucleoprotein complex subunit 4 [EC:5.4.99.-]+ko03008//Ribosome biogenesis in eukaryotes;K11131//H/ACA ribonucleoprotein complex subunit 4 [EC:5.4.99.-]+ko03008//Ribos…	DKCLD (NUC011) domain	XM_011399979.1 Auxenochlorella protothecoides Threonine-tRNA ligase partial mRNA	unnamed protein product [Albugo candida]	[J] KOG2529 Pseudouridine synthase	H/ACA ribonucleoprotein complex subunit 4 OS=Arabidopsis thaliana GN=CBF5 PE=1 SV=1	GO:0006396//RNA processing;GO:0003723//RNA binding;GO:0030529//intracellular ribonucleoprotein complex;GO:0001522//pseudouridine synthesis;GO:0009982//pseudouridine synthase activity;GO:0019013//viral nucleocapsid
CL5490.Contig6_All	2038	ko03008//Ribosome biogenesis in eukaryotes	Genetic Information Processing	Translation	1.35453	0	0	K14565//nucleolar protein 58+ko03008//Ribosome biogenesis in eukaryotes;K14565//nucleolar protein 58+ko03008//Ribosome biogenesis in eukaryotes;K14565//nucleolar protein 58+ko03008//Ribosome biogenesis in eukaryotes	snoRNA binding domain, fibrillarin	XM_005850100.1 Chlorella variabilis hypothetical protein (CHLNCDRAFT_57124) mRNA, complete cds	conserved unknown protein [Ectocarpus siliculosus]	[AJ] KOG2572 Ribosome biogenesis protein - Nop58p/Nop5p	Probable nucleolar protein 5-1 OS=Arabidopsis thaliana GN=NOP5-1 PE=1 SV=2	GO:0000154//rRNA modification;GO:0030515//snoRNA binding;GO:0032040//small-subunit processome;GO:0031428//box C/D snoRNP complex
CL5490.Contig4_All	1862	ko03008//Ribosome biogenesis in eukaryotes	Genetic Information Processing	Translation	1.31051	3.03927e-219	1.35763e-220	K14565//nucleolar protein 58+ko03008//Ribosome biogenesis in eukaryotes;K14565//nucleolar protein 58+ko03008//Ribosome biogenesis in eukaryotes;K14565//nucleolar protein 58+ko03008//Ribosome biogenesis in eukaryotes;K14565//nucleolar protein 58+ko03008//Ribosome biogenesis in eukaryotes	snoRNA binding domain, fibrillarin	XM_005850100.1 Chlorella variabilis hypothetical protein (CHLNCDRAFT_57124) mRNA, complete cds	conserved unknown protein [Ectocarpus siliculosus]	[AJ] KOG2572 Ribosome biogenesis protein - Nop58p/Nop5p	Probable nucleolar protein 5-2 OS=Arabidopsis thaliana GN=NOP5-2 PE=1 SV=1	GO:0000154//rRNA modification;GO:0030515//snoRNA binding;GO:0032040//small-subunit processome;GO:0031428//box C/D snoRNP complex
Unigene1422_All	993	ko03008//Ribosome biogenesis in eukaryotes	Genetic Information Processing	Translation	1.3013	0	0	K11129//H/ACA ribonucleoprotein complex subunit 2+ko03008//Ribosome biogenesis in eukaryotes;K11129//H/ACA ribonucleoprotein complex subunit 2+ko03008//Ribosome biogenesis in eukaryotes;K11129//H/ACA ribonucleoprotein complex subunit 2+ko03008//Ribosome biogenesis in eukaryotes;K11129//H/ACA ribonucleoprotein complex subunit 2+ko03008//Ribosome biogenesis in eukaryotes	Ribosomal protein L7Ae/L30e/S12e/Gadd45 family		H/ACA ribonucleoprotein complex subunit 2 [Fistulifera solaris]	[A] KOG3167 Box H/ACA snoRNP component, involved in ribosomal RNA pseudouridinylation	H/ACA ribonucleoprotein complex subunit 2-like protein OS=Arabidopsis thaliana GN=At5g08180 PE=1 SV=1	GO:0005840//ribosome;GO:0003723//RNA binding;GO:0000469//cleavage involved in rRNA processing;GO:0034513//box H/ACA snoRNA binding;GO:0031429//box H/ACA snoRNP complex;GO:0000470//maturation of LSU-rRNA;GO:0031120//snRNA pseudouridine synthesis;GO:0005730//nucleolus;GO:0006412//translation;GO:0031118//rRNA pseudouridine synthesis
Unigene18610_All	1064	ko03008//Ribosome biogenesis in eukaryotes	Genetic Information Processing	Translation	1.29933	1.92183e-11	7.07304e-12	K14539//large subunit GTPase 1 [EC:3.6.1.-]+ko03008//Ribosome biogenesis in eukaryotes;K14539//large subunit GTPase 1 [EC:3.6.1.-]+ko03008//Ribosome biogenesis in eukaryotes			Lsg1, cytoplasmic GTPase involved in the ribosome assembly [Ectocarpus siliculosus]	[R] KOG1424 Predicted GTP-binding protein MMR1	Nuclear/nucleolar GTPase 2 OS=Arabidopsis thaliana GN=NUG2 PE=1 SV=1	GO:0005525//GTP binding
CL1878.Contig1_All	1850	ko03008//Ribosome biogenesis in eukaryotes	Genetic Information Processing	Translation	1.27743	0	0	K11131//H/ACA ribonucleoprotein complex subunit 4 [EC:5.4.99.-]+ko03008//Ribosome biogenesis in eukaryotes;K11131//H/ACA ribonucleoprotein complex subunit 4 [EC:5.4.99.-]+ko03008//Ribosome biogenesis in eukaryotes;K11131//H/ACA ribonucleoprotein complex subunit 4 [EC:5.4.99.-]+ko03008//Ribosome biogenesis in eukaryotes;K11131//H/ACA ribonucleoprotein complex subunit 4 [EC:5.4.99.-]+ko03008//Ribos…	DKCLD (NUC011) domain	XM_009037109.1 Aureococcus anophagefferens hypothetical protein partial mRNA	tRNA pseudouridine(55) synthase [Phytophthora parasitica P1569] >ETK80913.1 tRNA pseudouridine(55) synthase [Phytophthora parasitica] >ETL34329.1 tRNA pseudouridine(55) synthase [Phytophthora parasitica] >ETL87605.1 tRNA pseudouridine(55) synthase [Phytophthora parasitica] >ETM40814.1 tRNA pseudouridine(55) synthase [Phytophthora parasitica] >ETO69502.1 tRNA pseudouridine(55) synthase [Phytophtho…	[J] KOG2529 Pseudouridine synthase	H/ACA ribonucleoprotein complex subunit 4 OS=Arabidopsis thaliana GN=CBF5 PE=1 SV=1	GO:0006396//RNA processing;GO:0003723//RNA binding;GO:0030529//intracellular ribonucleoprotein complex;GO:0001522//pseudouridine synthesis;GO:0009982//pseudouridine synthase activity;GO:0019013//viral nucleocapsid
CL10977.Contig4_All	2875	ko04016//MAPK signaling pathway - plant;ko03018//RNA degradation;ko03008//Ribosome biogenesis in eukaryotes	Environmental Information Processing;Genetic Information Processing	Signal transduction;Folding, sorting and degradation;Translation	1.27312	7.66654e-87	6.91245e-88	K12618//5'-3' exoribonuclease 1 [EC:3.1.13.-]+ko03018//RNA degradation+ko03008//Ribosome biogenesis in eukaryotes;K12618//5'-3' exoribonuclease 1 [EC:3.1.13.-]+ko03018//RNA degradation+ko03008//Ribosome biogenesis in eukaryotes;K20553//5'-3' exoribonuclease 4 [EC:3.1.13.-]+ko04016//MAPK signaling pathway - plant;K20553//5'-3' exoribonuclease 4 [EC:3.1.13.-]+ko04016//MAPK signaling pathway - plant	XRN 5'-3' exonuclease N-terminus	XM_005855406.1 Nannochloropsis gaditana CCMP526 5 -3 exoribonuclease partial mRNA	dhm exonuclease [Ectocarpus siliculosus]	[LD] KOG2045 5'-3' exonuclease XRN1/KEM1/SEP1 involved in DNA strand exchange and mRNA turnover	5'-3' exoribonuclease 3 OS=Arabidopsis thaliana GN=XRN3 PE=1 SV=1	GO:0004527//exonuclease activity;GO:0005634//nucleus;GO:0004534//5'-3' exoribonuclease activity;GO:0003676//nucleic acid binding
CL2757.Contig5_All	883	ko03008//Ribosome biogenesis in eukaryotes;ko03013//RNA transport	Genetic Information Processing	Translation	1.25993	2.22718e-06	1.19851e-06	K03538//ribonuclease P protein subunit POP4 [EC:3.1.26.5]+ko03013//RNA transport+ko03008//Ribosome biogenesis in eukaryotes	Domain of unknown function UPF0086		conserved unknown protein [Ectocarpus siliculosus]	[A] KOG4046 RNase MRP and P, subunit POP4/p29
CL5256.Contig1_All	771	ko03008//Ribosome biogenesis in eukaryotes	Genetic Information Processing	Translation	1.25548	7.26397e-13	2.47282e-13	K14546//U3 small nucleolar RNA-associated protein 5+ko03008//Ribosome biogenesis in eukaryotes;K14546//U3 small nucleolar RNA-associated protein 5+ko03008//Ribosome biogenesis in eukaryotes;K14546//U3 small nucleolar RNA-associated protein 5+ko03008//Ribosome biogenesis in eukaryotes;K14546//U3 small nucleolar RNA-associated protein 5+ko03008//Ribosome biogenesis in eukaryotes;K14546//U3 small nu…	WD domain, G-beta repeat		conserved unknown protein [Ectocarpus siliculosus]	[R] KOG0266 WD40 repeat-containing protein	COMPASS-like H3K4 histone methylase component WDR5A OS=Arabidopsis thaliana GN=WDR5A PE=1 SV=1
CL5490.Contig2_All	1658	ko03008//Ribosome biogenesis in eukaryotes	Genetic Information Processing	Translation	1.21116	0.000112144	7.40405e-05	K14565//nucleolar protein 58+ko03008//Ribosome biogenesis in eukaryotes;K14565//nucleolar protein 58+ko03008//Ribosome biogenesis in eukaryotes	snoRNA binding domain, fibrillarin	XM_013042842.1 Blastocystis hominis mRNA	conserved unknown protein [Ectocarpus siliculosus]	[AJ] KOG2572 Ribosome biogenesis protein - Nop58p/Nop5p	Probable nucleolar protein 5-1 OS=Arabidopsis thaliana GN=NOP5-1 PE=1 SV=2	GO:0000154//rRNA modification;GO:0030515//snoRNA binding;GO:0032040//small-subunit processome;GO:0031428//box C/D snoRNP complex
CL2677.Contig1_All	834	ko03008//Ribosome biogenesis in eukaryotes	Genetic Information Processing	Translation	1.20966	4.36486e-39	6.98966e-40	K14563//rRNA 2'-O-methyltransferase fibrillarin [EC:2.1.1.-]+ko03008//Ribosome biogenesis in eukaryotes;K14563//rRNA 2'-O-methyltransferase fibrillarin [EC:2.1.1.-]+ko03008//Ribosome biogenesis in eukaryotes;K14563//rRNA 2'-O-methyltransferase fibrillarin [EC:2.1.1.-]+ko03008//Ribosome biogenesis in eukaryotes;K14563//rRNA 2'-O-methyltransferase fibrillarin [EC:2.1.1.-]+ko03008//Ribosome biogenes…	Fibrillarin	XM_001701801.1 Chlamydomonas reinhardtii nucleolar protein, component of C/D snoRNPs (NOP1), mRNA	rRNA 2'-O-methyltransferase fibrillarin [Aphanomyces astaci] >ETV76667.1 rRNA 2'-O-methyltransferase fibrillarin [Aphanomyces astaci]	[A] KOG1596 Fibrillarin and related nucleolar RNA-binding proteins	Mediator of RNA polymerase II transcription subunit 36a OS=Arabidopsis thaliana GN=MED36A PE=1 SV=2	GO:1990259//histone-glutamine methyltransferase activity;GO:0003723//RNA binding;GO:0008168//methyltransferase activity;GO:0031428//box C/D snoRNP complex;GO:0006364//rRNA processing;GO:0008033//tRNA processing;GO:0031167//rRNA methylation;GO:0032040//small-subunit processome;GO:0000494//box C/D snoRNA 3'-end processing;GO:0008649//rRNA methyltransferase activity;GO:0015030//Cajal body;GO:1990258…
Unigene18964_All	1561	ko03008//Ribosome biogenesis in eukaryotes	Genetic Information Processing	Translation	1.20033	7.61757e-32	1.41962e-32	K15502//serine/threonine-protein phosphatase 6 regulatory ankyrin repeat subunit A;K15502//serine/threonine-protein phosphatase 6 regulatory ankyrin repeat subunit A;K02184//formin 2;K02184//formin 2;K14563//rRNA 2'-O-methyltransferase fibrillarin [EC:2.1.1.-]+ko03008//Ribosome biogenesis in eukaryotes	Ankyrin repeats (3 copies)		hypothetical protein H257_16728 [Aphanomyces astaci] >ETV66920.1 hypothetical protein H257_16728 [Aphanomyces astaci]	[M] KOG4177 Ankyrin	DEAD-box ATP-dependent RNA helicase 52B OS=Oryza sativa subsp. japonica GN=PL10B PE=2 SV=1
CL5490.Contig1_All	1624	ko03008//Ribosome biogenesis in eukaryotes	Genetic Information Processing	Translation	1.18384	3.93024e-114	2.89943e-115	K14565//nucleolar protein 58+ko03008//Ribosome biogenesis in eukaryotes;K14565//nucleolar protein 58+ko03008//Ribosome biogenesis in eukaryotes;K14565//nucleolar protein 58+ko03008//Ribosome biogenesis in eukaryotes	snoRNA binding domain, fibrillarin	XM_013042842.1 Blastocystis hominis mRNA	nucleolar protein NOP5 [Phytophthora infestans T30-4] >EEY55508.1 nucleolar protein NOP5 [Phytophthora infestans T30-4]	[AJ] KOG2572 Ribosome biogenesis protein - Nop58p/Nop5p	Probable nucleolar protein 5-2 OS=Arabidopsis thaliana GN=NOP5-2 PE=1 SV=1	GO:0000154//rRNA modification;GO:0030515//snoRNA binding;GO:0032040//small-subunit processome;GO:0031428//box C/D snoRNP complex
Unigene11335_All	1958	ko03008//Ribosome biogenesis in eukaryotes	Genetic Information Processing	Translation	1.17089	5.09217e-75	5.12284e-76	K14564//nucleolar protein 56+ko03008//Ribosome biogenesis in eukaryotes;K14564//nucleolar protein 56+ko03008//Ribosome biogenesis in eukaryotes;K14564//nucleolar protein 56+ko03008//Ribosome biogenesis in eukaryotes;K14564//nucleolar protein 56+ko03008//Ribosome biogenesis in eukaryotes;K14564//nucleolar protein 56+ko03008//Ribosome biogenesis in eukaryotes	snoRNA binding domain, fibrillarin	XM_008617855.1 Saprolegnia diclina VS20 hypothetical protein mRNA	conserved unknown protein [Ectocarpus siliculosus]	[AJ] KOG2573 Ribosome biogenesis protein - Nop56p/Sik1p	DEAD-box ATP-dependent RNA helicase 27 OS=Arabidopsis thaliana GN=RH27 PE=2 SV=2	GO:0000154//rRNA modification;GO:0030515//snoRNA binding;GO:0032040//small-subunit processome;GO:0031428//box C/D snoRNP complex
CL1878.Contig3_All	1728	ko03008//Ribosome biogenesis in eukaryotes	Genetic Information Processing	Translation	1.12557	4.91381e-39	7.87564e-40	K11131//H/ACA ribonucleoprotein complex subunit 4 [EC:5.4.99.-]+ko03008//Ribosome biogenesis in eukaryotes;K11131//H/ACA ribonucleoprotein complex subunit 4 [EC:5.4.99.-]+ko03008//Ribosome biogenesis in eukaryotes;K11131//H/ACA ribonucleoprotein complex subunit 4 [EC:5.4.99.-]+ko03008//Ribosome biogenesis in eukaryotes;K11131//H/ACA ribonucleoprotein complex subunit 4 [EC:5.4.99.-]+ko03008//Ribos…	DKCLD (NUC011) domain	XM_011399979.1 Auxenochlorella protothecoides Threonine-tRNA ligase partial mRNA	tRNA pseudouridine(55) synthase [Phytophthora parasitica P1569] >ETK80913.1 tRNA pseudouridine(55) synthase [Phytophthora parasitica] >ETL34329.1 tRNA pseudouridine(55) synthase [Phytophthora parasitica] >ETL87605.1 tRNA pseudouridine(55) synthase [Phytophthora parasitica] >ETM40814.1 tRNA pseudouridine(55) synthase [Phytophthora parasitica] >ETO69502.1 tRNA pseudouridine(55) synthase [Phytophtho…	[J] KOG2529 Pseudouridine synthase	H/ACA ribonucleoprotein complex subunit 4 OS=Arabidopsis thaliana GN=CBF5 PE=1 SV=1	GO:0006396//RNA processing;GO:0003723//RNA binding;GO:0001522//pseudouridine synthesis;GO:0009982//pseudouridine synthase activity
Unigene76591_All	711	ko03008//Ribosome biogenesis in eukaryotes;ko03018//RNA degradation	Genetic Information Processing	Translation;Folding, sorting and degradation	1.10362	5.83638e-62	6.72725e-63	K12618//5'-3' exoribonuclease 1 [EC:3.1.13.-]+ko03018//RNA degradation+ko03008//Ribosome biogenesis in eukaryotes;K12618//5'-3' exoribonuclease 1 [EC:3.1.13.-]+ko03018//RNA degradation+ko03008//Ribosome biogenesis in eukaryotes;K12619//5'-3' exoribonuclease 2 [EC:3.1.13.-]+ko03018//RNA degradation+ko03008//Ribosome biogenesis in eukaryotes;K12619//5'-3' exoribonuclease 2 [EC:3.1.13.-]+ko03018//RN…	SnoaL-like polyketide cyclase		hypothetical protein BU14_0470s0014 [Porphyra umbilicalis]	[LD] KOG2045 5'-3' exonuclease XRN1/KEM1/SEP1 involved in DNA strand exchange and mRNA turnover	5'-3' exoribonuclease 3 OS=Arabidopsis thaliana GN=XRN3 PE=1 SV=1	GO:0004527//exonuclease activity;GO:0005634//nucleus;GO:0004534//5'-3' exoribonuclease activity;GO:0003676//nucleic acid binding
CL8130.Contig2_All	1549	ko03008//Ribosome biogenesis in eukaryotes	Genetic Information Processing	Translation	1.09453	2.72404e-84	2.50979e-85	K14565//nucleolar protein 58+ko03008//Ribosome biogenesis in eukaryotes;K11131//H/ACA ribonucleoprotein complex subunit 4 [EC:5.4.99.-]+ko03008//Ribosome biogenesis in eukaryotes;K11131//H/ACA ribonucleoprotein complex subunit 4 [EC:5.4.99.-]+ko03008//Ribosome biogenesis in eukaryotes;K11131//H/ACA ribonucleoprotein complex subunit 4 [EC:5.4.99.-]+ko03008//Ribosome biogenesis in eukaryotes;K13179…	Preprotein translocase subunit	XM_007508110.1 Bathycoccus prasinos unknown protein (Bathy18g00820), partial mRNA	conserved unknown protein [Ectocarpus siliculosus]	[A] KOG0342 ATP-dependent RNA helicase pitchoune	DEAD-box ATP-dependent RNA helicase 27 OS=Arabidopsis thaliana GN=RH27 PE=2 SV=2	GO:0016021//integral component of membrane
CL2677.Contig4_All	985	ko03008//Ribosome biogenesis in eukaryotes	Genetic Information Processing	Translation	1.06291	1.15442e-122	8.11244e-124	K14563//rRNA 2'-O-methyltransferase fibrillarin [EC:2.1.1.-]+ko03008//Ribosome biogenesis in eukaryotes;K14563//rRNA 2'-O-methyltransferase fibrillarin [EC:2.1.1.-]+ko03008//Ribosome biogenesis in eukaryotes;K14563//rRNA 2'-O-methyltransferase fibrillarin [EC:2.1.1.-]+ko03008//Ribosome biogenesis in eukaryotes;K14563//rRNA 2'-O-methyltransferase fibrillarin [EC:2.1.1.-]+ko03008//Ribosome biogenes…	Fibrillarin	XM_001701801.1 Chlamydomonas reinhardtii nucleolar protein, component of C/D snoRNPs (NOP1), mRNA	predicted protein [Thalassiosira pseudonana CCMP1335] >EED89293.1 predicted protein [Thalassiosira pseudonana CCMP1335]	[A] KOG1596 Fibrillarin and related nucleolar RNA-binding proteins	Mediator of RNA polymerase II transcription subunit 36a OS=Arabidopsis thaliana GN=MED36A PE=1 SV=2	GO:1990259//histone-glutamine methyltransferase activity;GO:0003723//RNA binding;GO:0031428//box C/D snoRNP complex;GO:0008033//tRNA processing;GO:0031167//rRNA methylation;GO:0032040//small-subunit processome;GO:0000494//box C/D snoRNA 3'-end processing;GO:0008649//rRNA methyltransferase activity;GO:0015030//Cajal body;GO:1990258//histone glutamine methylation
CL2560.Contig1_All	828	ko03008//Ribosome biogenesis in eukaryotes	Genetic Information Processing	Translation	1.00354	2.45522e-135	1.61425e-136	K01180//endo-1,3(4)-beta-glucanase [EC:3.2.1.6];K14563//rRNA 2'-O-methyltransferase fibrillarin [EC:2.1.1.-]+ko03008//Ribosome biogenesis in eukaryotes;K14563//rRNA 2'-O-methyltransferase fibrillarin [EC:2.1.1.-]+ko03008//Ribosome biogenesis in eukaryotes	Transposase zinc-ribbon domain		hypothetical protein SELMODRAFT_438863 [Selaginella moellendorffii] >EFJ34497.1 hypothetical protein SELMODRAFT_438863 [Selaginella moellendorffii]	[R] KOG1995 Conserved Zn-finger protein	Leucine-rich repeat extensin-like protein 6 OS=Arabidopsis thaliana GN=LRX6 PE=2 SV=1
Unigene35274_All	1062	ko03008//Ribosome biogenesis in eukaryotes	Genetic Information Processing	Translation	-1.00006	0.000254669	0.000177171	K14788//ribosome biogenesis protein ENP2;K02184//formin 2;K14563//rRNA 2'-O-methyltransferase fibrillarin [EC:2.1.1.-]+ko03008//Ribosome biogenesis in eukaryotes;K11593//eukaryotic translation initiation factor 2C;K11593//eukaryotic translation initiation factor 2C			PREDICTED: lysine-rich arabinogalactan protein 19 [Vitis vinifera]	[A] KOG1596 Fibrillarin and related nucleolar RNA-binding proteins	Protein argonaute 2 OS=Oryza sativa subsp. japonica GN=AGO2 PE=2 SV=2
CL3689.Contig6_All	1524	ko03008//Ribosome biogenesis in eukaryotes	Genetic Information Processing	Translation	-1.02114	1.90361e-08	8.53473e-09	K11131//H/ACA ribonucleoprotein complex subunit 4 [EC:5.4.99.-]+ko03008//Ribosome biogenesis in eukaryotes	Protein of unknown function (DUF2967)		hypothetical protein GUITHDRAFT_46531, partial [Guillardia theta CCMP2712] >EKX53412.1 hypothetical protein GUITHDRAFT_46531, partial [Guillardia theta CCMP2712]			GO:0008168//methyltransferase activity;GO:0003676//nucleic acid binding
Unigene22564_All	685	ko03008//Ribosome biogenesis in eukaryotes	Genetic Information Processing	Translation	-1.02791	9.00823e-36	1.53856e-36	K17046//protein DEK;K11131//H/ACA ribonucleoprotein complex subunit 4 [EC:5.4.99.-]+ko03008//Ribosome biogenesis in eukaryotes;K14565//nucleolar protein 58+ko03008//Ribosome biogenesis in eukaryotes;K14565//nucleolar protein 58+ko03008//Ribosome biogenesis in eukaryotes;K14565//nucleolar protein 58+ko03008//Ribosome biogenesis in eukaryotes	Domain of unknown function (DUF4604)	AC216456.1 Populus trichocarpa clone POP034-G24, complete sequence	hypothetical protein JH06_2941 [Blastocystis sp. subtype 4] >KNB43216.1 hypothetical protein JH06_2941 [Blastocystis sp. subtype 4]	[K] KOG1015 Transcription regulator XNP/ATRX, DEAD-box superfamily
Unigene18553_All	748	ko03008//Ribosome biogenesis in eukaryotes	Genetic Information Processing	Translation	-1.05516	5.78203e-07	2.93901e-07	K14565//nucleolar protein 58+ko03008//Ribosome biogenesis in eukaryotes	Fungal Zn(2)-Cys(6) binuclear cluster domain		hypothetical protein EUTSA_v10000072mg [Eutrema salsugineum] >ESQ46197.1 hypothetical protein EUTSA_v10000072mg [Eutrema salsugineum]			GO:0016021//integral component of membrane
CL7712.Contig5_All	1281	ko03008//Ribosome biogenesis in eukaryotes;ko03040//Spliceosome	Genetic Information Processing	Transcription;Translation	-1.07156	1.80238e-07	8.75914e-08	K18626//trichohyalin;K11131//H/ACA ribonucleoprotein complex subunit 4 [EC:5.4.99.-]+ko03008//Ribosome biogenesis in eukaryotes;K17046//protein DEK;K11984//U4/U6.U5 tri-snRNP-associated protein 1+ko03040//Spliceosome	Phage tail fibre adhesin Gp38		hypothetical protein, variant [Aphanomyces astaci] >ETV74591.1 hypothetical protein, variant [Aphanomyces astaci]	[W] LSE0516 C Uncharacterized protein, contains major sperm protein (MSP) domain	Pectinesterase inhibitor 10 OS=Arabidopsis thaliana GN=PMEI10 PE=2 SV=1	GO:0003723//RNA binding;GO:0005524//ATP binding;GO:0004386//helicase activity
Unigene23412_All	982	ko03008//Ribosome biogenesis in eukaryotes;ko01100//Metabolic pathways;ko04016//MAPK signaling pathway - plant;ko00520//Amino sugar and nucleotide sugar metabolism	Metabolism;Environmental Information Processing;Genetic Information Processing	Signal transduction;Carbohydrate metabolism;Translation;Global and overview maps	-1.08836	2.21823e-30	4.25349e-31	K14563//rRNA 2'-O-methyltransferase fibrillarin [EC:2.1.1.-]+ko03008//Ribosome biogenesis in eukaryotes;K20547//basic endochitinase B [EC:3.2.1.14]+ko04016//MAPK signaling pathway - plant+ko00520//Amino sugar and nucleotide sugar metabolism+ko01100//Metabolic pathways;K01180//endo-1,3(4)-beta-glucanase [EC:3.2.1.6];K14563//rRNA 2'-O-methyltransferase fibrillarin [EC:2.1.1.-]+ko03008//Ribosome bio…	Mitochondrial and peroxisomal fission factor Mff		hypothetical protein EMIHUDRAFT_121290 [Emiliania huxleyi CCMP1516] >EOD06465.1 hypothetical protein EMIHUDRAFT_121290 [Emiliania huxleyi CCMP1516]	[ZR] LSE0118 A Protein possibly involved in cytoskeleton rearrangements, contains FH domain	Formin-like protein 8 OS=Oryza sativa subsp. japonica GN=FH8 PE=2 SV=1	GO:0016021//integral component of membrane
CL5626.Contig3_All	2064	ko03013//RNA transport;ko03008//Ribosome biogenesis in eukaryotes	Genetic Information Processing	Translation	-1.09196	3.62509e-43	5.39602e-44	K07562//nonsense-mediated mRNA decay protein 3+ko03013//RNA transport+ko03008//Ribosome biogenesis in eukaryotes;K07562//nonsense-mediated mRNA decay protein 3+ko03013//RNA transport+ko03008//Ribosome biogenesis in eukaryotes	NMD3 family	KJ195045.1 Mesotaenium braunii neochrome mRNA, partial cds	hypothetical protein H310_07040 [Aphanomyces invadans] >ETW00402.1 hypothetical protein H310_07040 [Aphanomyces invadans]	[J] KOG2613 NMD protein affecting ribosome stability and mRNA decay	Formin-like protein 3 OS=Oryza sativa subsp. japonica GN=FH3 PE=2 SV=2	GO:0005634//nucleus;GO:0015031//protein transport;GO:0005737//cytoplasm
Unigene25874_All	968	ko03008//Ribosome biogenesis in eukaryotes	Genetic Information Processing	Translation	-1.1162	6.2589e-07	3.1945e-07	K02184//formin 2;K14571//ribosome biogenesis ATPase+ko03008//Ribosome biogenesis in eukaryotes	ATPase family associated with various cellular activities (AAA)		cell division cycle protein 48 [Phytophthora infestans T30-4] >EEY53164.1 cell division cycle protein 48 [Phytophthora infestans T30-4]	[W] KOG3544 Collagens (type IV and type XIII), and related proteins	Formin-like protein 18 OS=Oryza sativa subsp. japonica GN=FH18 PE=2 SV=1	GO:0009535//chloroplast thylakoid membrane;GO:0005524//ATP binding;GO:0051301//cell division;GO:0005516//calmodulin binding
Unigene901_All	715	ko03008//Ribosome biogenesis in eukaryotes	Genetic Information Processing	Translation	-1.13628	2.60934e-05	1.58537e-05	K14554//U3 small nucleolar RNA-associated protein 21+ko03008//Ribosome biogenesis in eukaryotes;K14554//U3 small nucleolar RNA-associated protein 21+ko03008//Ribosome biogenesis in eukaryotes	Anaphase-promoting complex subunit 4 WD40 domain	XM_011401233.1 Auxenochlorella protothecoides putative WD repeat-containing protein partial mRNA	similar to WD repeat domain 36 [Ectocarpus siliculosus]	[R] KOG1539 WD repeat protein	Formin-like protein 5 OS=Oryza sativa subsp. japonica GN=FH5 PE=2 SV=2	GO:0018160//peptidyl-pyrromethane cofactor linkage;GO:0032040//small-subunit processome;GO:0033014//tetrapyrrole biosynthetic process;GO:0004418//hydroxymethylbilane synthase activity;GO:0006364//rRNA processing
CL9584.Contig1_All	755	ko03008//Ribosome biogenesis in eukaryotes	Genetic Information Processing	Translation	-1.15116	1.17622e-06	6.15923e-07	K14556//U3 small nucleolar RNA-associated protein 12+ko03008//Ribosome biogenesis in eukaryotes;K14556//U3 small nucleolar RNA-associated protein 12+ko03008//Ribosome biogenesis in eukaryotes	WD domain, G-beta repeat		hypothetical protein F442_02477 [Phytophthora parasitica P10297]	[K] KOG0263 Transcription initiation factor TFIID, subunit TAF5 (also component of histone acetyltransferase SAGA)	Coatomer subunit beta'-1 OS=Oryza sativa subsp. japonica GN=Os06g0143900 PE=2 SV=1	GO:0005509//calcium ion binding
CL9291.Contig4_All	1713	ko03008//Ribosome biogenesis in eukaryotes	Genetic Information Processing	Translation	-1.19548	3.10276e-54	3.94455e-55	K14565//nucleolar protein 58+ko03008//Ribosome biogenesis in eukaryotes	Predicted membrane protein (DUF2070)		hypothetical protein Csa_3G238220 [Cucumis sativus]	[S] LSE0099 A Uncharacterized protein		GO:0003677//DNA binding;GO:0006334//nucleosome assembly;GO:0000786//nucleosome
CL10667.Contig2_All	7010	ko03008//Ribosome biogenesis in eukaryotes	Genetic Information Processing	Translation	-1.2514	0	0	K14564//nucleolar protein 56+ko03008//Ribosome biogenesis in eukaryotes;K14564//nucleolar protein 56+ko03008//Ribosome biogenesis in eukaryotes;K14564//nucleolar protein 56+ko03008//Ribosome biogenesis in eukaryotes;K14564//nucleolar protein 56+ko03008//Ribosome biogenesis in eukaryotes;K14564//nucleolar protein 56+ko03008//Ribosome biogenesis in eukaryotes	snoRNA binding domain, fibrillarin	XM_012352921.1 Saprolegnia parasitica CBS 223.65 hypothetical protein mRNA	Nucleolar protein 56 [Phytophthora nicotianae]	[AJ] KOG2573 Ribosome biogenesis protein - Nop56p/Sik1p	DEAD-box ATP-dependent RNA helicase 27 OS=Arabidopsis thaliana GN=RH27 PE=2 SV=2	GO:0000154//rRNA modification;GO:0030515//snoRNA binding;GO:0032040//small-subunit processome;GO:0031428//box C/D snoRNP complex
Unigene45663_All	725	ko03008//Ribosome biogenesis in eukaryotes;ko03040//Spliceosome	Genetic Information Processing	Transcription;Translation	-1.28376	2.84316e-15	8.67406e-16	K12823//ATP-dependent RNA helicase DDX5/DBP2 [EC:3.6.4.13]+ko03040//Spliceosome;K12823//ATP-dependent RNA helicase DDX5/DBP2 [EC:3.6.4.13]+ko03040//Spliceosome;K14563//rRNA 2'-O-methyltransferase fibrillarin [EC:2.1.1.-]+ko03008//Ribosome biogenesis in eukaryotes
CL8197.Contig1_All	1071	ko03008//Ribosome biogenesis in eukaryotes	Genetic Information Processing	Translation	-1.29849	8.79455e-18	2.4167e-18	K14570//RNA exonuclease 1 [EC:3.1.-.-]+ko03008//Ribosome biogenesis in eukaryotes;K14570//RNA exonuclease 1 [EC:3.1.-.-]+ko03008//Ribosome biogenesis in eukaryotes;K14570//RNA exonuclease 1 [EC:3.1.-.-]+ko03008//Ribosome biogenesis in eukaryotes;K14570//RNA exonuclease 1 [EC:3.1.-.-]+ko03008//Ribosome biogenesis in eukaryotes;K14570//RNA exonuclease 1 [EC:3.1.-.-]+ko03008//Ribosome biogenesis in …	Exonuclease		exonuclease [Thraustotheca clavata]	[L] KOG2248 3'-5' exonuclease	Small RNA degrading nuclease 5 OS=Arabidopsis thaliana GN=SDN5 PE=2 SV=2	GO:0003676//nucleic acid binding
Unigene9343_All	1540	ko01110//Biosynthesis of secondary metabolites;ko01100//Metabolic pathways;ko03008//Ribosome biogenesis in eukaryotes;ko00230//Purine metabolism	Genetic Information Processing;Metabolism	Translation;Nucleotide metabolism;Global and overview maps	-1.35888	1.04168e-09	4.27165e-10	K18532//adenylate kinase [EC:2.7.4.3]+ko00230//Purine metabolism+ko01100//Metabolic pathways+ko03008//Ribosome biogenesis in eukaryotes+ko01110//Biosynthesis of secondary metabolites	MaoC like domain		MaoClike domain containing protein [Thraustotheca clavata]	[I] KOG1206 Peroxisomal multifunctional beta-oxidation protein and related enzymes
CL11075.Contig4_All	6376	ko03008//Ribosome biogenesis in eukaryotes	Genetic Information Processing	Translation	-1.38637	2.03198e-42	3.06836e-43	K11090//lupus La protein;K14563//rRNA 2'-O-methyltransferase fibrillarin [EC:2.1.1.-]+ko03008//Ribosome biogenesis in eukaryotes;K14563//rRNA 2'-O-methyltransferase fibrillarin [EC:2.1.1.-]+ko03008//Ribosome biogenesis in eukaryotes;K14563//rRNA 2'-O-methyltransferase fibrillarin [EC:2.1.1.-]+ko03008//Ribosome biogenesis in eukaryotes	GDSL-like Lipase/Acylhydrolase family		PREDICTED: keratinocyte proline-rich protein-like [Nicotiana attenuata]	[A] KOG1596 Fibrillarin and related nucleolar RNA-binding proteins	Protein argonaute 14 OS=Oryza sativa subsp. japonica GN=AGO14 PE=2 SV=1
CL6997.Contig2_All	956	ko03008//Ribosome biogenesis in eukaryotes	Genetic Information Processing	Translation	-1.4099	1.11431e-06	5.82382e-07	K14556//U3 small nucleolar RNA-associated protein 12+ko03008//Ribosome biogenesis in eukaryotes	Anaphase-promoting complex subunit 4 WD40 domain		conserved unknown protein [Ectocarpus siliculosus]			GO:0005509//calcium ion binding
CL10918.Contig2_All	1054	ko03008//Ribosome biogenesis in eukaryotes;ko04141//Protein processing in endoplasmic reticulum	Genetic Information Processing	Translation;Folding, sorting and degradation	-1.43138	1.74282e-39	2.77333e-40	K14575//AAA family ATPase+ko03008//Ribosome biogenesis in eukaryotes;K14575//AAA family ATPase+ko03008//Ribosome biogenesis in eukaryotes;K13525//transitional endoplasmic reticulum ATPase+ko04141//Protein processing in endoplasmic reticulum;K14575//AAA family ATPase+ko03008//Ribosome biogenesis in eukaryotes	ATPase family associated with various cellular activities (AAA)	CP018158.1 Oryza sativa Indica Group cultivar Shuhui498 chromosome 2 sequence	hypothetical protein L917_13740, partial [Phytophthora parasitica]	[O] KOG0730 AAA+-type ATPase	Calmodulin-interacting protein 111 OS=Arabidopsis thaliana GN=CIP111 PE=1 SV=1	GO:0005524//ATP binding
CL509.Contig4_All	1146	ko04712//Circadian rhythm - plant;ko03008//Ribosome biogenesis in eukaryotes	Genetic Information Processing;Organismal Systems	Translation;Environmental adaptation	-1.4422	3.74456e-30	7.21941e-31	K02184//formin 2;K19984//exocyst complex component 5;K02184//formin 2;K03115//casein kinase II subunit beta+ko04712//Circadian rhythm - plant+ko03008//Ribosome biogenesis in eukaryotes	Leukemia-associated protein 7	XM_003058362.1 Micromonas pusilla CCMP1545 predicted protein, mRNA	hypothetical protein BU14_0127s0011 [Porphyra umbilicalis]	[TZ] KOG3671 Actin regulatory protein (Wiskott-Aldrich syndrome protein)	Glycine-rich cell wall structural protein 1.0 OS=Phaseolus vulgaris PE=2 SV=1
Unigene221_All	2323	ko03008//Ribosome biogenesis in eukaryotes	Genetic Information Processing	Translation	-1.48268	2.08043e-12	7.25631e-13	K14572//midasin+ko03008//Ribosome biogenesis in eukaryotes	ATPase family associated with various cellular activities (AAA)		PREDICTED: peptidyl-prolyl cis-trans isomerase D [Ricinus communis] >EEF24668.1 rotamase, putative [Ricinus communis]			GO:0003755//peptidyl-prolyl cis-trans isomerase activity
CL5626.Contig1_All	1927	ko03013//RNA transport;ko03008//Ribosome biogenesis in eukaryotes	Genetic Information Processing	Translation	-1.49169	0.000111078	7.33035e-05	K07562//nonsense-mediated mRNA decay protein 3+ko03013//RNA transport+ko03008//Ribosome biogenesis in eukaryotes;K07562//nonsense-mediated mRNA decay protein 3+ko03013//RNA transport+ko03008//Ribosome biogenesis in eukaryotes;K07562//nonsense-mediated mRNA decay protein 3+ko03013//RNA transport+ko03008//Ribosome biogenesis in eukaryotes;K07562//nonsense-mediated mRNA decay protein 3+ko03013//RNA …	NMD3 family	XM_001754960.1 Physcomitrella patens subsp. patens predicted protein (PHYPADRAFT_67782) mRNA, complete cds	conserved unknown protein [Ectocarpus siliculosus]	[J] KOG2613 NMD protein affecting ribosome stability and mRNA decay		GO:0005634//nucleus;GO:0015031//protein transport;GO:0005737//cytoplasm
CL11075.Contig5_All	4907	ko03008//Ribosome biogenesis in eukaryotes	Genetic Information Processing	Translation	-1.51758	5.92828e-115	4.35554e-116	K11090//lupus La protein;K14563//rRNA 2'-O-methyltransferase fibrillarin [EC:2.1.1.-]+ko03008//Ribosome biogenesis in eukaryotes;K14563//rRNA 2'-O-methyltransferase fibrillarin [EC:2.1.1.-]+ko03008//Ribosome biogenesis in eukaryotes;K14563//rRNA 2'-O-methyltransferase fibrillarin [EC:2.1.1.-]+ko03008//Ribosome biogenesis in eukaryotes	GDSL-like Lipase/Acylhydrolase family		PREDICTED: keratinocyte proline-rich protein-like [Nicotiana attenuata]	[A] KOG1596 Fibrillarin and related nucleolar RNA-binding proteins	Protein argonaute 14 OS=Oryza sativa subsp. japonica GN=AGO14 PE=2 SV=1
CL10082.Contig2_All	3480	ko03013//RNA transport;ko03008//Ribosome biogenesis in eukaryotes	Genetic Information Processing	Translation	-1.51947	1.12648e-54	1.42552e-55	K07936//GTP-binding nuclear protein Ran+ko03013//RNA transport+ko03008//Ribosome biogenesis in eukaryotes;K07936//GTP-binding nuclear protein Ran+ko03013//RNA transport+ko03008//Ribosome biogenesis in eukaryotes;K07936//GTP-binding nuclear protein Ran+ko03013//RNA transport+ko03008//Ribosome biogenesis in eukaryotes;K07936//GTP-binding nuclear protein Ran+ko03013//RNA transport+ko03008//Ribosome …	Ras family	KU573232.1 Populus tomentosa clone Ptom.006G250400 RAN family protein 1 mRNA, complete cds	GTP-binding nuclear protein Ran [Fistulifera solaris]	[U] KOG0096 GTPase Ran/TC4/GSP1 (nuclear protein transport pathway), small G protein superfamily	GTP-binding nuclear protein Ran-1 OS=Oryza sativa subsp. indica GN=RAN1 PE=2 SV=2	GO:0005634//nucleus;GO:0006913//nucleocytoplasmic transport;GO:0000054//ribosomal subunit export from nucleus;GO:0006606//protein import into nucleus;GO:0005525//GTP binding;GO:0015031//protein transport;GO:0005737//cytoplasm;GO:0003924//GTPase activity
CL1823.Contig3_All	1025	ko03008//Ribosome biogenesis in eukaryotes	Genetic Information Processing	Translation	-1.53101	3.23576e-22	7.63767e-23	K15613//homeobox protein Meis1;K15613//homeobox protein Meis1;K22020//mucin-19;K14563//rRNA 2'-O-methyltransferase fibrillarin [EC:2.1.1.-]+ko03008//Ribosome biogenesis in eukaryotes	Homeobox KN domain		hypothetical protein THRCLA_11300, partial [Thraustotheca clavata]	[K] KOG0773 Transcription factor MEIS1 and related HOX domain proteins	Formin-like protein 14 OS=Arabidopsis thaliana GN=FH14 PE=3 SV=3	GO:0003677//DNA binding;GO:0005634//nucleus;GO:0006355//regulation of transcription, DNA-templated
CL6392.Contig2_All	1711	ko03008//Ribosome biogenesis in eukaryotes;ko03013//RNA transport	Genetic Information Processing	Translation	-1.57592	7.34159e-131	4.95537e-132	K03539//ribonuclease P/MRP protein subunit RPP1 [EC:3.1.26.5]+ko03013//RNA transport+ko03008//Ribosome biogenesis in eukaryotes;K03539//ribonuclease P/MRP protein subunit RPP1 [EC:3.1.26.5]+ko03013//RNA transport+ko03008//Ribosome biogenesis in eukaryotes;K03539//ribonuclease P/MRP protein subunit RPP1 [EC:3.1.26.5]+ko03013//RNA transport+ko03008//Ribosome biogenesis in eukaryotes;K03539//ribonuc…	CCT motif		hypothetical protein PHYSODRAFT_288671 [Phytophthora sojae] >EGZ09063.1 hypothetical protein PHYSODRAFT_288671 [Phytophthora sojae]	[K] KOG1601 GATA-4/5/6 transcription factors	Zinc finger protein CONSTANS-LIKE 5 OS=Arabidopsis thaliana GN=COL5 PE=2 SV=2
Unigene2028_All	544	ko03008//Ribosome biogenesis in eukaryotes;ko04712//Circadian rhythm - plant	Organismal Systems;Genetic Information Processing	Translation;Environmental adaptation	-1.61298	1.40579e-36	2.36284e-37	K03097//casein kinase II subunit alpha [EC:2.7.11.1]+ko04712//Circadian rhythm - plant+ko03008//Ribosome biogenesis in eukaryotes	Protein kinase domain			[TDK] KOG0668 Casein kinase II, alpha subunit	Casein kinase II subunit alpha-4, chloroplastic OS=Arabidopsis thaliana GN=CKA4 PE=2 SV=1
Unigene35062_All	554	ko03008//Ribosome biogenesis in eukaryotes	Genetic Information Processing	Translation	-1.6589	0.000271294	0.000189647	K14555//U3 small nucleolar RNA-associated protein 13+ko03008//Ribosome biogenesis in eukaryotes;K14555//U3 small nucleolar RNA-associated protein 13+ko03008//Ribosome biogenesis in eukaryotes;K14753//guanine nucleotide-binding protein subunit beta-2-like 1 protein	WD domain, G-beta repeat		WD40-repeat containing [Chondrus crispus] >CDF36531.1 WD40-repeat containing [Chondrus crispus]	[D] KOG0267 Microtubule severing protein katanin p80 subunit B (contains WD40 repeats)	Transcription initiation factor TFIID subunit 5 OS=Arabidopsis thaliana GN=TAF5 PE=1 SV=1	GO:0043531//ADP binding;GO:0004842//ubiquitin-protein transferase activity
CL8878.Contig1_All	2030	ko03008//Ribosome biogenesis in eukaryotes	Genetic Information Processing	Translation	-1.6871	7.85001e-190	3.9076e-191	K14572//midasin+ko03008//Ribosome biogenesis in eukaryotes;K14572//midasin+ko03008//Ribosome biogenesis in eukaryotes;K14572//midasin+ko03008//Ribosome biogenesis in eukaryotes;K14572//midasin+ko03008//Ribosome biogenesis in eukaryotes	VWA domain containing CoxE-like protein	XM_002445996.2 PREDICTED: Sorghum bicolor SWI/SNF complex subunit SWI3D (LOC8065962), mRNA	midasin-like protein [Ectocarpus siliculosus]	[R] KOG1808 AAA ATPase containing von Willebrand factor type A (vWA) domain	Formin-like protein 3 OS=Oryza sativa subsp. japonica GN=FH3 PE=2 SV=2
CL8985.Contig1_All	2107	ko03013//RNA transport;ko03008//Ribosome biogenesis in eukaryotes	Genetic Information Processing	Translation	-1.69839	2.3033e-12	8.05173e-13	K02184//formin 2;K11593//eukaryotic translation initiation factor 2C;K11593//eukaryotic translation initiation factor 2C;K19984//exocyst complex component 5;K14525//ribonucleases P/MRP protein subunit RPP25 [EC:3.1.26.5]+ko03013//RNA transport+ko03008//Ribosome biogenesis in eukaryotes	Histone methylation protein DOT1		formin-like protein 20 [Helianthus annuus] >OTG16396.1 putative C2 domain, Formin, FH2 domain, Protein-tyrosine phosphatase-like protein [Helianthus annuus]	[RI] LSE0388 A Predicted lipase	Protein argonaute 2 OS=Oryza sativa subsp. japonica GN=AGO2 PE=2 SV=2
Unigene45887_All	713	ko03040//Spliceosome;ko03008//Ribosome biogenesis in eukaryotes	Genetic Information Processing	Transcription;Translation	-1.72628	6.73931e-05	4.31151e-05	K11131//H/ACA ribonucleoprotein complex subunit 4 [EC:5.4.99.-]+ko03008//Ribosome biogenesis in eukaryotes;K12811//ATP-dependent RNA helicase DDX46/PRP5 [EC:3.6.4.13]+ko03040//Spliceosome;K13118//protein DGCR14;K12811//ATP-dependent RNA helicase DDX46/PRP5 [EC:3.6.4.13]+ko03040//Spliceosome			PREDICTED: vicilin-like seed storage protein At2g18540 [Brassica rapa]	[W] LSE0345 A 12S cruciferin seed storage protein/vicilin-like seed storage protein	Probable calcium-binding protein CML49 OS=Arabidopsis thaliana GN=CML49 PE=2 SV=1	GO:0003723//RNA binding;GO:0001522//pseudouridine synthesis;GO:0009982//pseudouridine synthase activity
Unigene38571_All	1370	ko04712//Circadian rhythm - plant;ko03008//Ribosome biogenesis in eukaryotes	Organismal Systems;Genetic Information Processing	Environmental adaptation;Translation	-1.81868	1.15259e-84	1.05893e-85	K03097//casein kinase II subunit alpha [EC:2.7.11.1]+ko04712//Circadian rhythm - plant+ko03008//Ribosome biogenesis in eukaryotes;K03097//casein kinase II subunit alpha [EC:2.7.11.1]+ko04712//Circadian rhythm - plant+ko03008//Ribosome biogenesis in eukaryotes;K03097//casein kinase II subunit alpha [EC:2.7.11.1]+ko04712//Circadian rhythm - plant+ko03008//Ribosome biogenesis in eukaryotes;K03097//c…	Protein kinase domain		CMGC/CK2 protein kinase [Aphanomyces astaci] >ETV82199.1 CMGC/CK2 protein kinase [Aphanomyces astaci]	[TDK] KOG0668 Casein kinase II, alpha subunit	Casein kinase II subunit alpha-2 OS=Arabidopsis thaliana GN=CKA2 PE=1 SV=3	GO:0005524//ATP binding;GO:0004672//protein kinase activity
CL4651.Contig4_All	1855	ko03008//Ribosome biogenesis in eukaryotes	Genetic Information Processing	Translation	-1.85288	6.09833e-16	1.80961e-16	K07178//RIO kinase 1 [EC:2.7.11.1]+ko03008//Ribosome biogenesis in eukaryotes;K07178//RIO kinase 1 [EC:2.7.11.1]+ko03008//Ribosome biogenesis in eukaryotes;K07178//RIO kinase 1 [EC:2.7.11.1]+ko03008//Ribosome biogenesis in eukaryotes;K07178//RIO kinase 1 [EC:2.7.11.1]+ko03008//Ribosome biogenesis in eukaryotes	RIO1 family		RIO kinase 1 [Nannochloropsis gaditana CCMP526] >EKU22223.1 RIO kinase 1 [Nannochloropsis gaditana CCMP526]	[TD] KOG2270 Serine/threonine protein kinase involved in cell cycle control	Formin-like protein 16 OS=Oryza sativa subsp. japonica GN=FH16 PE=2 SV=1	GO:0004674//protein serine/threonine kinase activity;GO:0005524//ATP binding
Unigene10226_All	2087	ko03008//Ribosome biogenesis in eukaryotes	Genetic Information Processing	Translation	-1.94354	1.12947e-05	6.57499e-06	K11131//H/ACA ribonucleoprotein complex subunit 4 [EC:5.4.99.-]+ko03008//Ribosome biogenesis in eukaryotes	Imidazoleglycerol-phosphate dehydratase		conserved hypothetical protein [Albugo laibachii Nc14]
Unigene9803_All	1849	ko03008//Ribosome biogenesis in eukaryotes;ko03013//RNA transport	Genetic Information Processing	Translation	-2.03411	2.78862e-22	6.56766e-23	K07936//GTP-binding nuclear protein Ran+ko03013//RNA transport+ko03008//Ribosome biogenesis in eukaryotes;K07936//GTP-binding nuclear protein Ran+ko03013//RNA transport+ko03008//Ribosome biogenesis in eukaryotes;K07936//GTP-binding nuclear protein Ran+ko03013//RNA transport+ko03008//Ribosome biogenesis in eukaryotes;K07936//GTP-binding nuclear protein Ran+ko03013//RNA transport+ko03008//Ribosome …			RAN, ras superfamily GTPase, partial [Emiliania huxleyi CCMP1516] >EOD38265.1 RAN, ras superfamily GTPase, partial [Emiliania huxleyi CCMP1516]	[U] KOG0096 GTPase Ran/TC4/GSP1 (nuclear protein transport pathway), small G protein superfamily	GTP-binding nuclear protein Ran1B (Fragment) OS=Lotus japonicus GN=RAN1B PE=2 SV=1	GO:0005634//nucleus;GO:0006913//nucleocytoplasmic transport;GO:0005525//GTP binding;GO:0015031//protein transport;GO:0003924//GTPase activity
CL6392.Contig1_All	1927	ko03008//Ribosome biogenesis in eukaryotes;ko03013//RNA transport	Genetic Information Processing	Translation	-2.22685	2.23024e-41	3.42696e-42	K03539//ribonuclease P/MRP protein subunit RPP1 [EC:3.1.26.5]+ko03013//RNA transport+ko03008//Ribosome biogenesis in eukaryotes;K03539//ribonuclease P/MRP protein subunit RPP1 [EC:3.1.26.5]+ko03013//RNA transport+ko03008//Ribosome biogenesis in eukaryotes;K03539//ribonuclease P/MRP protein subunit RPP1 [EC:3.1.26.5]+ko03013//RNA transport+ko03008//Ribosome biogenesis in eukaryotes;K03539//ribonuc…		HQ832783.1 Oncidium Gower Ramsey trypsin inhibitor1 (TI1), hypothetical protein (HY1), trypsin inhibitor2 (TI2), and trypsin inhibitor 3 (TI3) genes, complete cds	hypothetical protein PPTG_03956 [Phytophthora parasitica INRA-310] >ETI36332.1 hypothetical protein F443_17523 [Phytophthora parasitica P1569] >ETK76560.1 hypothetical protein L915_17057 [Phytophthora parasitica] >ETL30003.1 hypothetical protein L916_16952 [Phytophthora parasitica] >ETL83224.1 hypothetical protein L917_16781 [Phytophthora parasitica] >ETM36444.1 hypothetical protein L914_16863 [P…		Zinc finger protein CONSTANS-LIKE 5 OS=Arabidopsis thaliana GN=COL5 PE=2 SV=2
CL4651.Contig1_All	1683	ko03008//Ribosome biogenesis in eukaryotes	Genetic Information Processing	Translation	-2.46916	0	0	K07178//RIO kinase 1 [EC:2.7.11.1]+ko03008//Ribosome biogenesis in eukaryotes;K07178//RIO kinase 1 [EC:2.7.11.1]+ko03008//Ribosome biogenesis in eukaryotes;K07178//RIO kinase 1 [EC:2.7.11.1]+ko03008//Ribosome biogenesis in eukaryotes;K07178//RIO kinase 1 [EC:2.7.11.1]+ko03008//Ribosome biogenesis in eukaryotes	RIO1 family		extragenic suppressor of the bimD6 mutation [Ectocarpus siliculosus]	[T] KOG2269 Serine/threonine protein kinase	Formin-like protein 16 OS=Oryza sativa subsp. japonica GN=FH16 PE=2 SV=1	GO:0004674//protein serine/threonine kinase activity;GO:0005524//ATP binding
Unigene22631_All	831	ko03008//Ribosome biogenesis in eukaryotes	Genetic Information Processing	Translation	-2.53515	1.84306e-78	1.78669e-79	K14572//midasin+ko03008//Ribosome biogenesis in eukaryotes;K11267//sister chromatid cohesion protein PDS5;K17046//protein DEK;K11279//nucleosome assembly protein 1-like 1		XM_008872980.1 Aphanomyces invadans hypothetical protein mRNA	midasin-like protein [Phytophthora infestans T30-4] >EEY58697.1 midasin-like protein [Phytophthora infestans T30-4]	[Y] KOG2992 Nucleolar GTPase/ATPase p130	Protein Ycf2 OS=Oenothera argillicola GN=ycf2-A PE=3 SV=1	GO:0005634//nucleus;GO:0005524//ATP binding;GO:0000027//ribosomal large subunit assembly;GO:0030687//preribosome, large subunit precursor;GO:0006364//rRNA processing;GO:0016887//ATPase activity
Unigene33403_All	2086	ko03008//Ribosome biogenesis in eukaryotes	Genetic Information Processing	Translation	-2.59022	1.40833e-43	2.07877e-44	K14572//midasin+ko03008//Ribosome biogenesis in eukaryotes;K14572//midasin+ko03008//Ribosome biogenesis in eukaryotes;K14572//midasin+ko03008//Ribosome biogenesis in eukaryotes;K14572//midasin+ko03008//Ribosome biogenesis in eukaryotes	AAA domain (dynein-related subfamily)		hypothetical protein L915_10449 [Phytophthora parasitica] >ETL38044.1 hypothetical protein L916_10342 [Phytophthora parasitica] >ETP14439.1 hypothetical protein F441_10632 [Phytophthora parasitica CJ01A1]	[R] KOG1808 AAA ATPase containing von Willebrand factor type A (vWA) domain	Formin-like protein 20 OS=Arabidopsis thaliana GN=FH20 PE=2 SV=3	GO:0005524//ATP binding;GO:0016887//ATPase activity
CL8878.Contig2_All	1960	ko03008//Ribosome biogenesis in eukaryotes	Genetic Information Processing	Translation	-2.59027	1.44777e-254	5.74502e-256	K14572//midasin+ko03008//Ribosome biogenesis in eukaryotes;K14572//midasin+ko03008//Ribosome biogenesis in eukaryotes;K14572//midasin+ko03008//Ribosome biogenesis in eukaryotes;K14572//midasin+ko03008//Ribosome biogenesis in eukaryotes;K14572//midasin+ko03008//Ribosome biogenesis in eukaryotes	VWA domain containing CoxE-like protein	XM_005765657.1 Emiliania huxleyi CCMP1516 hypothetical protein mRNA	midasin-like protein [Ectocarpus siliculosus]	[R] KOG1808 AAA ATPase containing von Willebrand factor type A (vWA) domain	Probable methyltransferase PMT27 OS=Arabidopsis thaliana GN=At3g51070 PE=3 SV=1
CL7231.Contig1_All	1254	ko03008//Ribosome biogenesis in eukaryotes	Genetic Information Processing	Translation	-2.63346	2.73253e-18	7.37807e-19	K18626//trichohyalin;K11131//H/ACA ribonucleoprotein complex subunit 4 [EC:5.4.99.-]+ko03008//Ribosome biogenesis in eukaryotes;K14565//nucleolar protein 58+ko03008//Ribosome biogenesis in eukaryotes;K17046//protein DEK	MgtE intracellular N domain		hypothetical protein JH06_2941 [Blastocystis sp. subtype 4] >KNB43216.1 hypothetical protein JH06_2941 [Blastocystis sp. subtype 4]	[R] LSE0304 A PWWP domain protein		GO:0016021//integral component of membrane
Unigene2716_All	765	ko03008//Ribosome biogenesis in eukaryotes	Genetic Information Processing	Translation	-2.6835	1.3872e-11	5.06328e-12	K18626//trichohyalin;K17046//protein DEK;K17046//protein DEK;K11131//H/ACA ribonucleoprotein complex subunit 4 [EC:5.4.99.-]+ko03008//Ribosome biogenesis in eukaryotes;K17046//protein DEK	Protein of unknown function (DUF1510)		hypothetical protein B456_007G260200 [Gossypium raimondii] >KJB44584.1 hypothetical protein B456_007G260200 [Gossypium raimondii]	[R] LSE0304 A PWWP domain protein	H/ACA ribonucleoprotein complex subunit 4 OS=Arabidopsis thaliana GN=CBF5 PE=1 SV=1
Unigene1049_All	1093	ko03008//Ribosome biogenesis in eukaryotes	Genetic Information Processing	Translation	-2.81868	1.51209e-30	2.89124e-31	K14572//midasin+ko03008//Ribosome biogenesis in eukaryotes;K14572//midasin+ko03008//Ribosome biogenesis in eukaryotes;K14572//midasin+ko03008//Ribosome biogenesis in eukaryotes;K14572//midasin+ko03008//Ribosome biogenesis in eukaryotes	AAA domain (dynein-related subfamily)		midasin-like protein [Ectocarpus siliculosus]	[R] KOG1808 AAA ATPase containing von Willebrand factor type A (vWA) domain		GO:0005524//ATP binding;GO:0016887//ATPase activity
Unigene2333_All	1170	ko03008//Ribosome biogenesis in eukaryotes	Genetic Information Processing	Translation	-3.08885	7.47221e-20	1.9047e-20	K14572//midasin+ko03008//Ribosome biogenesis in eukaryotes;K14572//midasin+ko03008//Ribosome biogenesis in eukaryotes	AAA domain (dynein-related subfamily)		midasin-like protein [Ectocarpus siliculosus]	[R] KOG1808 AAA ATPase containing von Willebrand factor type A (vWA) domain	Anther-specific protein SF18 (Fragment) OS=Helianthus annuus PE=2 SV=1
CL4651.Contig3_All	1015	ko03008//Ribosome biogenesis in eukaryotes	Genetic Information Processing	Translation	-3.09438	1.00468e-39	1.59046e-40	K07178//RIO kinase 1 [EC:2.7.11.1]+ko03008//Ribosome biogenesis in eukaryotes;K07178//RIO kinase 1 [EC:2.7.11.1]+ko03008//Ribosome biogenesis in eukaryotes;K07178//RIO kinase 1 [EC:2.7.11.1]+ko03008//Ribosome biogenesis in eukaryotes;K07178//RIO kinase 1 [EC:2.7.11.1]+ko03008//Ribosome biogenesis in eukaryotes	RIO1 family		extragenic suppressor of the bimD6 mutation [Ectocarpus siliculosus]	[TD] KOG2270 Serine/threonine protein kinase involved in cell cycle control		GO:0004674//protein serine/threonine kinase activity;GO:0005524//ATP binding
CL10920.Contig10_All	779	ko03008//Ribosome biogenesis in eukaryotes	Genetic Information Processing	Translation	-3.24801	7.42042e-08	3.48944e-08	K18626//trichohyalin;K18626//trichohyalin;K18626//trichohyalin;K11131//H/ACA ribonucleoprotein complex subunit 4 [EC:5.4.99.-]+ko03008//Ribosome biogenesis in eukaryotes			trichohyalin [Blastocystis sp. ATCC 50177/Nand II]	[S] KOG4415 Uncharacterized conserved protein	Protein Ycf2 OS=Oenothera parviflora GN=ycf2-A PE=3 SV=1
Unigene35858_All	434	ko03008//Ribosome biogenesis in eukaryotes	Genetic Information Processing	Translation	-3.40364	4.39469e-07	2.21031e-07	K14572//midasin+ko03008//Ribosome biogenesis in eukaryotes;K14572//midasin+ko03008//Ribosome biogenesis in eukaryotes;K14572//midasin+ko03008//Ribosome biogenesis in eukaryotes	AAA domain (dynein-related subfamily)	XM_001703507.1 Chlamydomonas reinhardtii predicted protein (CHLREDRAFT_169185), partial mRNA	MDN1, midasin [Ostreococcus tauri]	[R] KOG1808 AAA ATPase containing von Willebrand factor type A (vWA) domain		GO:0005524//ATP binding;GO:0016887//ATPase activity
Unigene46772_All	1773	ko03008//Ribosome biogenesis in eukaryotes;ko03013//RNA transport;ko04712//Circadian rhythm - plant	Organismal Systems;Genetic Information Processing	Translation;Environmental adaptation	-3.55524	1.65292e-52	2.14425e-53	K12130//pseudo-response regulator 5+ko04712//Circadian rhythm - plant;K03539//ribonuclease P/MRP protein subunit RPP1 [EC:3.1.26.5]+ko03013//RNA transport+ko03008//Ribosome biogenesis in eukaryotes;K03539//ribonuclease P/MRP protein subunit RPP1 [EC:3.1.26.5]+ko03013//RNA transport+ko03008//Ribosome biogenesis in eukaryotes	CCT motif		hypothetical protein FRACYDRAFT_261853 [Fragilariopsis cylindrus CCMP1102]	[K] KOG1601 GATA-4/5/6 transcription factors	Zinc finger protein CONSTANS-LIKE 3 OS=Arabidopsis thaliana GN=COL3 PE=1 SV=1
Unigene14507_All	2651	ko03008//Ribosome biogenesis in eukaryotes	Genetic Information Processing	Translation	-3.95871	3.88494e-36	6.58839e-37	K14564//nucleolar protein 56+ko03008//Ribosome biogenesis in eukaryotes;K14564//nucleolar protein 56+ko03008//Ribosome biogenesis in eukaryotes;K14564//nucleolar protein 56+ko03008//Ribosome biogenesis in eukaryotes;K14564//nucleolar protein 56+ko03008//Ribosome biogenesis in eukaryotes;K14564//nucleolar protein 56+ko03008//Ribosome biogenesis in eukaryotes	snoRNA binding domain, fibrillarin	XM_012352921.1 Saprolegnia parasitica CBS 223.65 hypothetical protein mRNA	hypothetical protein PHYSODRAFT_482921, partial [Phytophthora sojae] >EGZ23723.1 hypothetical protein PHYSODRAFT_482921, partial [Phytophthora sojae]	[AJ] KOG2573 Ribosome biogenesis protein - Nop56p/Sik1p	Probable nucleolar protein 5-1 OS=Arabidopsis thaliana GN=NOP5-1 PE=1 SV=2	GO:0000154//rRNA modification;GO:0030515//snoRNA binding;GO:0032040//small-subunit processome;GO:0031428//box C/D snoRNP complex
Unigene60230_All	649	ko03008//Ribosome biogenesis in eukaryotes	Genetic Information Processing	Translation	-4.49384	0.000965735	0.000743173	K14572//midasin+ko03008//Ribosome biogenesis in eukaryotes;K14572//midasin+ko03008//Ribosome biogenesis in eukaryotes;K14572//midasin+ko03008//Ribosome biogenesis in eukaryotes	AAA domain (dynein-related subfamily)		midasin [Thraustotheca clavata]	[R] KOG1808 AAA ATPase containing von Willebrand factor type A (vWA) domain		GO:0005524//ATP binding;GO:0000027//ribosomal large subunit assembly;GO:0030687//preribosome, large subunit precursor;GO:0006364//rRNA processing;GO:0016887//ATPase activity
Unigene40365_All	290	ko04144//Endocytosis;ko03008//Ribosome biogenesis in eukaryotes	Cellular Processes;Genetic Information Processing	Translation;Transport and catabolism	-4.67826	5.78036e-07	2.93805e-07	K14572//midasin+ko03008//Ribosome biogenesis in eukaryotes;K05747//Wiskott-Aldrich syndrome protein+ko04144//Endocytosis;K05747//Wiskott-Aldrich syndrome protein+ko04144//Endocytosis			Midasin [Phytophthora nicotianae]	[AR] KOG2146 Splicing coactivator SRm160/300, subunit SRm160 (contains PWI domain)	Formin-like protein 5 OS=Oryza sativa subsp. japonica GN=FH5 PE=2 SV=2
CL777.Contig6_All	2352	ko01100//Metabolic pathways;ko03008//Ribosome biogenesis in eukaryotes;ko00520//Amino sugar and nucleotide sugar metabolism;ko04016//MAPK signaling pathway - plant	Environmental Information Processing;Metabolism;Genetic Information Processing	Carbohydrate metabolism;Translation;Global and overview maps;Signal transduction	-4.86557	4.10587e-34	7.28181e-35	K20547//basic endochitinase B [EC:3.2.1.14]+ko04016//MAPK signaling pathway - plant+ko00520//Amino sugar and nucleotide sugar metabolism+ko01100//Metabolic pathways;K14563//rRNA 2'-O-methyltransferase fibrillarin [EC:2.1.1.-]+ko03008//Ribosome biogenesis in eukaryotes;K11593//eukaryotic translation initiation factor 2C	Lectin C-type domain		hypothetical protein VOLCADRAFT_121694 [Volvox carteri f. nagariensis] >EFJ40697.1 hypothetical protein VOLCADRAFT_121694 [Volvox carteri f. nagariensis]	[J] KOG3262 H/ACA small nucleolar RNP component GAR1	Protein argonaute 12 OS=Oryza sativa subsp. japonica GN=AGO12 PE=2 SV=2	GO:0016021//integral component of membrane
CL3762.Contig2_All	971	ko03008//Ribosome biogenesis in eukaryotes;ko04141//Protein processing in endoplasmic reticulum	Genetic Information Processing	Folding, sorting and degradation;Translation	-5.15044	2.44141e-05	1.47853e-05	K13525//transitional endoplasmic reticulum ATPase+ko04141//Protein processing in endoplasmic reticulum;K13525//transitional endoplasmic reticulum ATPase+ko04141//Protein processing in endoplasmic reticulum;K13525//transitional endoplasmic reticulum ATPase+ko04141//Protein processing in endoplasmic reticulum;K14571//ribosome biogenesis ATPase+ko03008//Ribosome biogenesis in eukaryotes	ATPase family associated with various cellular activities (AAA)			[O] KOG0730 AAA+-type ATPase
Unigene73660_All	469	ko01100//Metabolic pathways;ko03008//Ribosome biogenesis in eukaryotes;ko00230//Purine metabolism;ko01110//Biosynthesis of secondary metabolites	Metabolism;Genetic Information Processing	Translation;Global and overview maps;Nucleotide metabolism	-5.20433	1.01231e-09	4.14773e-10	K18532//adenylate kinase [EC:2.7.4.3]+ko00230//Purine metabolism+ko01100//Metabolic pathways+ko03008//Ribosome biogenesis in eukaryotes+ko01110//Biosynthesis of secondary metabolites	MaoC like domain		uncharacterized protein LOC109749349 [Aegilops tauschii subsp. tauschii]	[I] KOG1206 Peroxisomal multifunctional beta-oxidation protein and related enzymes
Unigene44028_All	1665	ko03008//Ribosome biogenesis in eukaryotes	Genetic Information Processing	Translation	-5.64911	4.02829e-36	6.83393e-37	K14572//midasin+ko03008//Ribosome biogenesis in eukaryotes;K14572//midasin+ko03008//Ribosome biogenesis in eukaryotes;K14572//midasin+ko03008//Ribosome biogenesis in eukaryotes	AAA domain (dynein-related subfamily)		midasin isoform X3 [Ananas comosus]			GO:0005524//ATP binding;GO:0000027//ribosomal large subunit assembly;GO:0030687//preribosome, large subunit precursor;GO:0006364//rRNA processing;GO:0016887//ATPase activity
CL7522.Contig1_All	1154	ko03008//Ribosome biogenesis in eukaryotes	Genetic Information Processing	Translation	-5.98114	1.41172e-08	6.27003e-09	K14575//AAA family ATPase+ko03008//Ribosome biogenesis in eukaryotes;K14575//AAA family ATPase+ko03008//Ribosome biogenesis in eukaryotes;K14575//AAA family ATPase+ko03008//Ribosome biogenesis in eukaryotes	ATPase family associated with various cellular activities (AAA)		similar to spermatogenesis associated factor SPAF [Ectocarpus siliculosus]	[O] KOG0730 AAA+-type ATPase	Calmodulin-interacting protein 111 OS=Arabidopsis thaliana GN=CIP111 PE=1 SV=1	GO:0005524//ATP binding

## Sheet: Ribosome
Supplementary Table 7:	Differentially expressed genes involved in protein processing in ribosome metabolism
Gene ID	Length	Pathway Name	Level 1	Level 2	log2(He_1000/He_400)	Qvalue(He_400-vs-He_1000)	Pvalue(He_400-vs-He_1000)	Kegg Orthology	Pfam	Nt	Nr	Kog	Swissprot	GO
Unigene36841_All	647	ko03010//Ribosome	Genetic Information Processing	Translation	5.87249	3.22835e-08	1.47352e-08	K02978//small subunit ribosomal protein S27e+ko03010//Ribosome;K02978//small subunit ribosomal protein S27e+ko03010//Ribosome;K02978//small subunit ribosomal protein S27e+ko03010//Ribosome;K02978//small subunit ribosomal protein S27e+ko03010//Ribosome	Ribosomal protein S27		hypothetical protein AURANDRAFT_27981 [Aureococcus anophagefferens] >EGB07485.1 hypothetical protein AURANDRAFT_27981 [Aureococcus anophagefferens]	[J] KOG1779 40s ribosomal protein S27	40S ribosomal protein S27-1 OS=Arabidopsis thaliana GN=RPS27A PE=3 SV=1	GO:0005840//ribosome;GO:0046872//metal ion binding;GO:0006412//translation;GO:0003735//structural constituent of ribosome
Unigene55867_All	397	ko03010//Ribosome	Genetic Information Processing	Translation	5.55056	7.98345e-07	4.11451e-07	K02937//large subunit ribosomal protein L7e+ko03010//Ribosome;K02937//large subunit ribosomal protein L7e+ko03010//Ribosome;K02937//large subunit ribosomal protein L7e+ko03010//Ribosome;K02937//large subunit ribosomal protein L7e+ko03010//Ribosome;K02937//large subunit ribosomal protein L7e+ko03010//Ribosome	Ribosomal L30 N-terminal domain		hypothetical protein EMIHUDRAFT_446099 [Emiliania huxleyi CCMP1516] >XP_005793598.1 hypothetical protein EMIHUDRAFT_433254 [Emiliania huxleyi CCMP1516] >EOD11472.1 hypothetical protein EMIHUDRAFT_446099 [Emiliania huxleyi CCMP1516] >EOD41169.1 hypothetical protein EMIHUDRAFT_433254 [Emiliania huxleyi CCMP1516]	[J] KOG3184 60S ribosomal protein L7	60S ribosomal protein L7-3 OS=Arabidopsis thaliana GN=RPL7C PE=2 SV=1	GO:0003723//RNA binding;GO:0002181//cytoplasmic translation;GO:0022625//cytosolic large ribosomal subunit;GO:0000463//maturation of LSU-rRNA from tricistronic rRNA transcript (SSU-rRNA, 5.8S rRNA, LSU-rRNA);GO:0003735//structural constituent of ribosome
Unigene20603_All	338	ko03010//Ribosome	Genetic Information Processing	Translation	5.48916	1.37698e-06	7.24902e-07	K02941//large subunit ribosomal protein LP0+ko03010//Ribosome;K02941//large subunit ribosomal protein LP0+ko03010//Ribosome;K02941//large subunit ribosomal protein LP0+ko03010//Ribosome;K02941//large subunit ribosomal protein LP0+ko03010//Ribosome			60S acidic ribosomal protein P0-2 [Auxenochlorella protothecoides] >KFM29126.1 60S acidic ribosomal protein P0-2 [Auxenochlorella protothecoides]	[J] KOG0815 60S acidic ribosomal protein P0	60S acidic ribosomal protein P0-2 OS=Arabidopsis thaliana GN=RPP0B PE=1 SV=2	GO:0005840//ribosome;GO:0042254//ribosome biogenesis
Unigene48125_All	531	ko03010//Ribosome	Genetic Information Processing	Translation	5.48916	1.37698e-06	7.24902e-07	K02989//small subunit ribosomal protein S5e+ko03010//Ribosome;K02989//small subunit ribosomal protein S5e+ko03010//Ribosome;K02989//small subunit ribosomal protein S5e+ko03010//Ribosome	Ribosomal protein S7p/S5e	XM_001695348.1 Chlamydomonas reinhardtii ribosomal protein S5 (RPS5), mRNA	component of cytosolic 80S ribosome and 40S small subunit [Volvox carteri f. nagariensis] >EFJ52561.1 component of cytosolic 80S ribosome and 40S small subunit [Volvox carteri f. nagariensis]	[J] KOG3291 Ribosomal protein S7	40S ribosomal protein S5 (Fragment) OS=Cicer arietinum GN=RPS5 PE=2 SV=1	GO:0003723//RNA binding;GO:0006412//translation;GO:0003735//structural constituent of ribosome;GO:0015935//small ribosomal subunit
Unigene55234_All	569	ko03010//Ribosome	Genetic Information Processing	Translation	5.48916	1.37698e-06	7.24902e-07	K02981//small subunit ribosomal protein S2e+ko03010//Ribosome;K02981//small subunit ribosomal protein S2e+ko03010//Ribosome;K02981//small subunit ribosomal protein S2e+ko03010//Ribosome;K02981//small subunit ribosomal protein S2e+ko03010//Ribosome;K02981//small subunit ribosomal protein S2e+ko03010//Ribosome	Ribosomal protein S5, C-terminal domain	XM_004302913.2 PREDICTED: Fragaria vesca subsp. vesca 40S ribosomal protein S2-1-like (LOC101310814), mRNA	predicted protein [Physcomitrella patens] >EDQ50877.1 predicted protein [Physcomitrella patens]	[J] KOG0877 40S ribosomal protein S2/30S ribosomal protein S5	40S ribosomal protein S2-3 OS=Arabidopsis thaliana GN=RPS2C PE=1 SV=2	GO:0016020//membrane;GO:0003723//RNA binding;GO:0003729//mRNA binding;GO:0042788//polysomal ribosome;GO:0009506//plasmodesma;GO:0005730//nucleolus;GO:0005829//cytosol;GO:0006412//translation;GO:0022627//cytosolic small ribosomal subunit;GO:0003735//structural constituent of ribosome;GO:0022626//cytosolic ribosome
Unigene48158_All	320	ko03010//Ribosome	Genetic Information Processing	Translation	5.42503	2.37441e-06	1.2817e-06	K02900//large subunit ribosomal protein L27Ae+ko03010//Ribosome;K02900//large subunit ribosomal protein L27Ae+ko03010//Ribosome;K02900//large subunit ribosomal protein L27Ae+ko03010//Ribosome;K02900//large subunit ribosomal protein L27Ae+ko03010//Ribosome;K02900//large subunit ribosomal protein L27Ae+ko03010//Ribosome	Ribosomal proteins 50S-L15, 50S-L18e, 60S-L27A	FJ968812.1 Chlamydomonas reinhardtii clone CNA72 molecular marker mRNA sequence	hypothetical protein AXG93_4368s2020 [Marchantia polymorpha subsp. ruderalis]	[J] KOG1742 60s ribosomal protein L15/L27	60S ribosomal protein L27a-3 OS=Arabidopsis thaliana GN=RPL27AC PE=2 SV=2	GO:0015934//large ribosomal subunit;GO:0006412//translation;GO:0003735//structural constituent of ribosome
Unigene40095_All	422	ko03010//Ribosome	Genetic Information Processing	Translation	5.35791	4.10543e-06	2.27456e-06	K02908//large subunit ribosomal protein L30e+ko03010//Ribosome;K02908//large subunit ribosomal protein L30e+ko03010//Ribosome;K02908//large subunit ribosomal protein L30e+ko03010//Ribosome;K02908//large subunit ribosomal protein L30e+ko03010//Ribosome;K02908//large subunit ribosomal protein L30e+ko03010//Ribosome	Ribosomal protein L7Ae/L30e/S12e/Gadd45 family	EU957894.1 Zea mays clone 1630285 60S ribosomal protein L30 mRNA, complete cds	large subunit ribosomal protein L30e, cytoplasmic [Guillardia theta CCMP2712] >EKX45675.1 large subunit ribosomal protein L30e, cytoplasmic [Guillardia theta CCMP2712]	[J] KOG2988 60S ribosomal protein L30	60S ribosomal protein L30 OS=Euphorbia esula GN=RPL30 PE=3 SV=1	GO:0005840//ribosome;GO:0003723//RNA binding;GO:0006412//translation;GO:0002181//cytoplasmic translation;GO:0022625//cytosolic large ribosomal subunit;GO:0003735//structural constituent of ribosome
Unigene56451_All	663	ko03010//Ribosome	Genetic Information Processing	Translation	5.35791	4.10543e-06	2.27456e-06	K02912//large subunit ribosomal protein L32e+ko03010//Ribosome;K02912//large subunit ribosomal protein L32e+ko03010//Ribosome;K02912//large subunit ribosomal protein L32e+ko03010//Ribosome	Ribosomal protein L32		predicted protein [Micromonas pusilla CCMP1545] >EEH57639.1 predicted protein [Micromonas pusilla CCMP1545]	[J] KOG0878 60S ribosomal protein L32	60S ribosomal protein L32-1 OS=Arabidopsis thaliana GN=RPL32A PE=2 SV=2	GO:0005840//ribosome;GO:0006412//translation;GO:0003735//structural constituent of ribosome
Unigene21253_All	565	ko03010//Ribosome	Genetic Information Processing	Translation	5.28752	7.1273e-06	4.05199e-06	K02989//small subunit ribosomal protein S5e+ko03010//Ribosome;K02989//small subunit ribosomal protein S5e+ko03010//Ribosome;K02989//small subunit ribosomal protein S5e+ko03010//Ribosome;K02989//small subunit ribosomal protein S5e+ko03010//Ribosome;K02989//small subunit ribosomal protein S5e+ko03010//Ribosome	Ribosomal protein S7p/S5e	XM_003568739.3 PREDICTED: Brachypodium distachyon 40S ribosomal protein S5 (LOC100833689), mRNA	PREDICTED: 40S ribosomal protein S5 [Phoenix dactylifera] >XP_010926656.1 PREDICTED: 40S ribosomal protein S5 [Elaeis guineensis]	[J] KOG3291 Ribosomal protein S7	40S ribosomal protein S5 (Fragment) OS=Nicotiana plumbaginifolia GN=RPS5 PE=2 SV=1	GO:0003723//RNA binding;GO:0006412//translation;GO:0003735//structural constituent of ribosome;GO:0015935//small ribosomal subunit
Unigene6885_All	1713	ko03010//Ribosome;ko03020//RNA polymerase	Genetic Information Processing	Translation;Transcription	4.90964	1.05361e-71	1.09407e-72	K03046//DNA-directed RNA polymerase subunit beta' [EC:2.7.7.6]+ko03020//RNA polymerase;K02948//small subunit ribosomal protein S11+ko03010//Ribosome		KY124271.1 Paulinella sp. DL-2016a strain FK01 plastid, complete genome	hypothetical protein M569_00222, partial [Genlisea aurea]
Unigene53175_All	409	ko03010//Ribosome	Genetic Information Processing	Translation	4.87249	0.000116754	7.74275e-05	K02868//large subunit ribosomal protein L11e+ko03010//Ribosome;K02868//large subunit ribosomal protein L11e+ko03010//Ribosome;K02868//large subunit ribosomal protein L11e+ko03010//Ribosome;K02868//large subunit ribosomal protein L11e+ko03010//Ribosome;K02868//large subunit ribosomal protein L11e+ko03010//Ribosome	Ribosomal protein L5	XM_008913759.1 Phytophthora parasitica INRA-310 60S ribosomal protein L11 mRNA	60S ribosomal protein L11 [Phytophthora parasitica INRA-310] >ETI37223.1 60S ribosomal protein L11 [Phytophthora parasitica P1569] >ETK77445.1 60S ribosomal protein L11 [Phytophthora parasitica] >ETL30892.1 60S ribosomal protein L11 [Phytophthora parasitica] >ETL84131.1 60S ribosomal protein L11 [Phytophthora parasitica] >ETM37312.1 60S ribosomal protein L11 [Phytophthora parasitica] >ETN02792.1 …	[J] KOG0397 60S ribosomal protein L11	60S ribosomal protein L11-2 OS=Arabidopsis thaliana GN=RPL11B PE=2 SV=2	GO:0005840//ribosome;GO:0003723//RNA binding;GO:0000027//ribosomal large subunit assembly;GO:0006412//translation;GO:0022625//cytosolic large ribosomal subunit;GO:0003735//structural constituent of ribosome
Unigene56269_All	422	ko03010//Ribosome	Genetic Information Processing	Translation	4.87249	0.000116754	7.74275e-05	K02977//small subunit ribosomal protein S27Ae+ko03010//Ribosome;K02977//small subunit ribosomal protein S27Ae+ko03010//Ribosome;K02977//small subunit ribosomal protein S27Ae+ko03010//Ribosome;K02977//small subunit ribosomal protein S27Ae+ko03010//Ribosome;K02977//small subunit ribosomal protein S27Ae+ko03010//Ribosome	Ubiquitin family	CP023131.1 Lupinus angustiflorus cultivar Tanjil chromosome LG-19	ribosomal protein s27a [Nannochloropsis gaditana]	[J] KOG0004 Ubiquitin/40S ribosomal protein S27a fusion	Ubiquitin-40S ribosomal protein S27a OS=Zea mays GN=UBF9 PE=2 SV=2	GO:0005840//ribosome;GO:0006412//translation;GO:0003735//structural constituent of ribosome
Unigene21000_All	448	ko03010//Ribosome	Genetic Information Processing	Translation	4.66603	0.000364626	0.000260449	K02930//large subunit ribosomal protein L4e+ko03010//Ribosome;K02930//large subunit ribosomal protein L4e+ko03010//Ribosome;K02930//large subunit ribosomal protein L4e+ko03010//Ribosome;K02930//large subunit ribosomal protein L4e+ko03010//Ribosome	60S ribosomal protein L4 C-terminal domain		60S ribosomal protein L4-1 [Auxenochlorella protothecoides] >KFM27485.1 60S ribosomal protein L4-1 [Auxenochlorella protothecoides]	[A] KOG1475 Ribosomal protein RPL1/RPL2/RL4L4	60S ribosomal protein L4-2 OS=Arabidopsis thaliana GN=RPL4D PE=1 SV=2	GO:0005840//ribosome;GO:0006412//translation;GO:0003735//structural constituent of ribosome
Unigene25268_All	317	ko03010//Ribosome	Genetic Information Processing	Translation	4.66603	0.000364626	0.000260449	K02971//small subunit ribosomal protein S21e+ko03010//Ribosome;K02971//small subunit ribosomal protein S21e+ko03010//Ribosome;K02971//small subunit ribosomal protein S21e+ko03010//Ribosome;K02971//small subunit ribosomal protein S21e+ko03010//Ribosome;K02971//small subunit ribosomal protein S21e+ko03010//Ribosome			40S ribosomal protein S21 [Thraustotheca clavata]	[J] KOG3486 40S ribosomal protein S21	40S ribosomal protein S21 OS=Cyanophora paradoxa GN=RPS21 PE=3 SV=1	GO:0005840//ribosome;GO:0006412//translation;GO:0003735//structural constituent of ribosome
Unigene51890_All	312	ko03010//Ribosome	Genetic Information Processing	Translation	4.66603	0.000364626	0.000260449	K02882//large subunit ribosomal protein L18Ae+ko03010//Ribosome;K02882//large subunit ribosomal protein L18Ae+ko03010//Ribosome;K02882//large subunit ribosomal protein L18Ae+ko03010//Ribosome;K02882//large subunit ribosomal protein L18Ae+ko03010//Ribosome;K02882//large subunit ribosomal protein L18Ae+ko03010//Ribosome			60S ribosomal protein L18a putative [Albugo laibachii Nc14]	[J] KOG0829 60S ribosomal protein L18A	60S ribosomal protein L18a OS=Oryza sativa subsp. japonica GN=RPL18A PE=1 SV=1	GO:0005840//ribosome;GO:0003723//RNA binding;GO:0006412//translation;GO:0022625//cytosolic large ribosomal subunit;GO:0003735//structural constituent of ribosome
Unigene55352_All	363	ko03010//Ribosome	Genetic Information Processing	Translation	4.66603	0.000364626	0.000260449	K02960//small subunit ribosomal protein S16e+ko03010//Ribosome;K02960//small subunit ribosomal protein S16e+ko03010//Ribosome;K02960//small subunit ribosomal protein S16e+ko03010//Ribosome;K02960//small subunit ribosomal protein S16e+ko03010//Ribosome;K02960//small subunit ribosomal protein S16e+ko03010//Ribosome	DASH complex subunit Dam1		PREDICTED: 40S ribosomal protein S16 [Gossypium arboreum]	[J] KOG1753 40S ribosomal protein S16	40S ribosomal protein S16 OS=Gossypium hirsutum GN=RPS16 PE=2 SV=1	GO:0005840//ribosome;GO:0006412//translation;GO:0003735//structural constituent of ribosome
Unigene55782_All	427	ko03010//Ribosome	Genetic Information Processing	Translation	4.66603	0.000364626	0.000260449	K02943//large subunit ribosomal protein LP2+ko03010//Ribosome;K02943//large subunit ribosomal protein LP2+ko03010//Ribosome;K02943//large subunit ribosomal protein LP2+ko03010//Ribosome;K02943//large subunit ribosomal protein LP2+ko03010//Ribosome;K02943//large subunit ribosomal protein LP2+ko03010//Ribosome	60s Acidic ribosomal protein		60S acidic ribosomal protein P2 [Phytophthora nicotianae]	[J] KOG3449 60S acidic ribosomal protein P2	60S acidic ribosomal protein P2A OS=Zea mays GN=RPP2A PE=1 SV=3	GO:0005840//ribosome;GO:0006414//translational elongation;GO:0003735//structural constituent of ribosome
Unigene54439_All	457	ko03010//Ribosome	Genetic Information Processing	Translation	4.60945	8.47229e-07	4.37293e-07	K02955//small subunit ribosomal protein S14e+ko03010//Ribosome;K02955//small subunit ribosomal protein S14e+ko03010//Ribosome;K02955//small subunit ribosomal protein S14e+ko03010//Ribosome;K02955//small subunit ribosomal protein S14e+ko03010//Ribosome;K02955//small subunit ribosomal protein S14e+ko03010//Ribosome	Ribosomal protein S11	BT084102.2 Zea mays full-length cDNA clone ZM_BFb0075F05 mRNA, complete cds	hypothetical protein THAOC_02899 [Thalassiosira oceanica]	[J] KOG0407 40S ribosomal protein S14	40S ribosomal protein S14 OS=Zea mays PE=3 SV=1	GO:0005840//ribosome;GO:0000462//maturation of SSU-rRNA from tricistronic rRNA transcript (SSU-rRNA, 5.8S rRNA, LSU-rRNA);GO:0048027//mRNA 5'-UTR binding;GO:0000028//ribosomal small subunit assembly;GO:0070181//small ribosomal subunit rRNA binding;GO:0006412//translation;GO:0022627//cytosolic small ribosomal subunit;GO:0003735//structural constituent of ribosome
Unigene10004_All	2233	ko03010//Ribosome	Genetic Information Processing	Translation	4.59353	7.38792e-90	6.50374e-91	K02876//large subunit ribosomal protein L15+ko03010//Ribosome;K02876//large subunit ribosomal protein L15+ko03010//Ribosome;K02876//large subunit ribosomal protein L15+ko03010//Ribosome;K02876//large subunit ribosomal protein L15+ko03010//Ribosome	Ribosomal proteins 50S-L15, 50S-L18e, 60S-L27A	CP018159.1 Oryza sativa Indica Group cultivar Shuhui498 chromosome 3 sequence	predicted protein, partial [Thalassiosira pseudonana CCMP1335] >EED96517.1 predicted protein, partial [Thalassiosira pseudonana CCMP1335]	[J] KOG0846 Mitochondrial/chloroplast ribosomal protein L15/L10	50S ribosomal protein L15, chloroplastic OS=Arabidopsis thaliana GN=RPL15 PE=1 SV=2	GO:0015934//large ribosomal subunit;GO:0006412//translation;GO:0009735//response to cytokinin;GO:0003735//structural constituent of ribosome;GO:0009941//chloroplast envelope;GO:0009570//chloroplast stroma
Unigene52320_All	399	ko03010//Ribosome	Genetic Information Processing	Translation	4.55056	0.000646709	0.000481528	K02900//large subunit ribosomal protein L27Ae+ko03010//Ribosome;K02900//large subunit ribosomal protein L27Ae+ko03010//Ribosome;K02900//large subunit ribosomal protein L27Ae+ko03010//Ribosome;K02900//large subunit ribosomal protein L27Ae+ko03010//Ribosome	Ribosomal proteins 50S-L15, 50S-L18e, 60S-L27A	XM_008440574.2 PREDICTED: Cucumis melo 60S ribosomal protein L27a-3-like (LOC103483791), mRNA	60s ribosomal protein l27a [Plasmopara halstedii]	[J] KOG1742 60s ribosomal protein L15/L27	60S ribosomal protein L27a-3 OS=Arabidopsis thaliana GN=RPL27AC PE=2 SV=2	GO:0003723//RNA binding;GO:0015934//large ribosomal subunit;GO:0002181//cytoplasmic translation;GO:0006412//translation;GO:0022625//cytosolic large ribosomal subunit;GO:0003735//structural constituent of ribosome
Unigene56486_All	423	ko03010//Ribosome	Genetic Information Processing	Translation	4.55056	0.000646709	0.000481528	K02941//large subunit ribosomal protein LP0+ko03010//Ribosome;K02941//large subunit ribosomal protein LP0+ko03010//Ribosome;K02941//large subunit ribosomal protein LP0+ko03010//Ribosome		XM_002896729.1 Phytophthora infestans T30-4 60S acidic ribosomal protein P0 (PITG_17261) mRNA, complete cds	60S acidic ribosomal protein P0 [Phytophthora infestans T30-4] >EEY66710.1 60S acidic ribosomal protein P0 [Phytophthora infestans T30-4]	[J] KOG0815 60S acidic ribosomal protein P0	60S acidic ribosomal protein P0 OS=Glycine max PE=2 SV=1	GO:0005840//ribosome;GO:0042254//ribosome biogenesis
Unigene13991_All	3566	ko00630//Glyoxylate and dicarboxylate metabolism;ko01100//Metabolic pathways;ko03010//Ribosome;ko01200//Carbon metabolism;ko00710//Carbon fixation in photosynthetic organisms	Genetic Information Processing;Metabolism	Global and overview maps;Translation;Energy metabolism;Carbohydrate metabolism	4.35884	1.55049e-298	5.36367e-300	K02948//small subunit ribosomal protein S11+ko03010//Ribosome;K01601//ribulose-bisphosphate carboxylase large chain [EC:4.1.1.39]+ko01100//Metabolic pathways+ko00710//Carbon fixation in photosynthetic organisms+ko01200//Carbon metabolism+ko00630//Glyoxylate and dicarboxylate metabolism;K02982//small subunit ribosomal protein S3+ko03010//Ribosome;K14826//FK506-binding nuclear protein [EC:5.2.1.8]		LC269923.1 Heterosigma akashiwo chloroplast DNA, complete genome, isolate: HaFk01	hypothetical protein M569_00222, partial [Genlisea aurea]
Unigene52319_All	473	ko03010//Ribosome	Genetic Information Processing	Translation	3.9656	0.00015091	0.000101305	K02900//large subunit ribosomal protein L27Ae+ko03010//Ribosome;K02900//large subunit ribosomal protein L27Ae+ko03010//Ribosome;K02900//large subunit ribosomal protein L27Ae+ko03010//Ribosome;K02900//large subunit ribosomal protein L27Ae+ko03010//Ribosome	Ribosomal proteins 50S-L15, 50S-L18e, 60S-L27A	XM_002287539.1 Thalassiosira pseudonana CCMP1335 RL17A, ribosomal protein 27A 60S large ribosomal subunit (RL27A), partial mRNA	RL17A, ribosomal protein 27A 60S large ribosomal subunit [Thalassiosira pseudonana CCMP1335] >EED95018.1 RL17A, ribosomal protein 27A 60S large ribosomal subunit [Thalassiosira pseudonana CCMP1335]	[J] KOG1742 60s ribosomal protein L15/L27	60S ribosomal protein L27a-2 OS=Arabidopsis thaliana GN=RPL27AB PE=2 SV=1	GO:0003723//RNA binding;GO:0015934//large ribosomal subunit;GO:0002181//cytoplasmic translation;GO:0006412//translation;GO:0022625//cytosolic large ribosomal subunit;GO:0003735//structural constituent of ribosome
Unigene48172_All	488	ko03010//Ribosome	Genetic Information Processing	Translation	3.48916	1.43286e-05	8.43428e-06	K02883//large subunit ribosomal protein L18e+ko03010//Ribosome;K02883//large subunit ribosomal protein L18e+ko03010//Ribosome;K02883//large subunit ribosomal protein L18e+ko03010//Ribosome;K02883//large subunit ribosomal protein L18e+ko03010//Ribosome	Ribosomal protein 60S L18 and 50S L18e	XM_002296119.1 Thalassiosira pseudonana CCMP1335 RL18, ribosomal protein 18, 60S large ribosomal subunit (RL18), mRNA	RL18, ribosomal protein 18, 60S large ribosomal subunit [Thalassiosira pseudonana CCMP1335] >ACI64872.1 RL18, ribosomal protein 18, 60S large ribosomal subunit [Thalassiosira pseudonana CCMP1335]	[J] KOG1714 60s ribosomal protein L18	60S ribosomal protein L18-3 OS=Arabidopsis thaliana GN=RPL18C PE=2 SV=1	GO:0005840//ribosome;GO:0003723//RNA binding;GO:0006412//translation;GO:0022625//cytosolic large ribosomal subunit;GO:0003735//structural constituent of ribosome
Unigene49118_All	689	ko03010//Ribosome	Genetic Information Processing	Translation	2.77295	0.00018813	0.000128583	K02871//large subunit ribosomal protein L13+ko03010//Ribosome;K02871//large subunit ribosomal protein L13+ko03010//Ribosome;K02871//large subunit ribosomal protein L13+ko03010//Ribosome;K02871//large subunit ribosomal protein L13+ko03010//Ribosome;K02871//large subunit ribosomal protein L13+ko03010//Ribosome	Ribosomal protein L13		50S ribosomal protein L13, partial [Glycine soja]	[J] KOG3203 Mitochondrial/chloroplast ribosomal protein L13	50S ribosomal protein L13, chloroplastic OS=Porphyra purpurea GN=rpl13 PE=3 SV=1	GO:0005840//ribosome;GO:0006412//translation;GO:0003735//structural constituent of ribosome;GO:0009536//plastid;GO:0009507//chloroplast
Unigene22589_All	1152	ko03010//Ribosome	Genetic Information Processing	Translation	2.72997	2.813e-15	8.57866e-16	K02960//small subunit ribosomal protein S16e+ko03010//Ribosome;K02960//small subunit ribosomal protein S16e+ko03010//Ribosome;K02960//small subunit ribosomal protein S16e+ko03010//Ribosome;K02960//small subunit ribosomal protein S16e+ko03010//Ribosome;K02960//small subunit ribosomal protein S16e+ko03010//Ribosome		AK063008.1 Oryza sativa Japonica Group cDNA clone:001-110-A01, full insert sequence	40S ribosomal protein S16 [Saprolegnia diclina VS20] >XP_012207446.1 40S ribosomal protein S16 [Saprolegnia parasitica CBS 223.65] >XP_012207464.1 40S ribosomal protein S16 [Saprolegnia parasitica CBS 223.65] >EQC38129.1 40S ribosomal protein S16 [Saprolegnia diclina VS20] >KDO21785.1 40S ribosomal protein S16 [Saprolegnia parasitica CBS 223.65] >KDO21891.1 40S ribosomal protein S16 [Saprolegnia …	[J] KOG1753 40S ribosomal protein S16	40S ribosomal protein S16 OS=Gossypium hirsutum GN=RPS16 PE=2 SV=1	GO:0005840//ribosome;GO:0006412//translation;GO:0003735//structural constituent of ribosome
Unigene25502_All	3219	ko03010//Ribosome;ko03020//RNA polymerase	Genetic Information Processing	Translation;Transcription	2.71192	0.000606791	0.000450121	K03040//DNA-directed RNA polymerase subunit alpha [EC:2.7.7.6]+ko03020//RNA polymerase;K03040//DNA-directed RNA polymerase subunit alpha [EC:2.7.7.6]+ko03020//RNA polymerase;K03040//DNA-directed RNA polymerase subunit alpha [EC:2.7.7.6]+ko03020//RNA polymerase;K03040//DNA-directed RNA polymerase subunit alpha [EC:2.7.7.6]+ko03020//RNA polymerase;K02986//small subunit ribosomal protein S4+ko03010/…	Ribosomal protein S11		[pt] DNA-directed RNA polymerase subunit alpha [Galdieria sulphuraria] >EME28488.1 [pt] DNA-directed RNA polymerase subunit alpha [Galdieria sulphuraria]	[J] KOG0408 Mitochondrial/chloroplast ribosomal protein S11	DNA-directed RNA polymerase subunit alpha OS=Cyanidium caldarium GN=rpoA PE=3 SV=1	GO:0005840//ribosome;GO:0003723//RNA binding;GO:0003677//DNA binding;GO:0006351//transcription, DNA-templated;GO:0046983//protein dimerization activity;GO:0003899//DNA-directed 5'-3' RNA polymerase activity;GO:0006412//translation;GO:0009536//plastid;GO:0003735//structural constituent of ribosome
Unigene53853_All	645	ko03010//Ribosome	Genetic Information Processing	Translation	2.66603	4.79966e-05	3.00593e-05	K02945//small subunit ribosomal protein S1+ko03010//Ribosome;K02945//small subunit ribosomal protein S1+ko03010//Ribosome	S1 RNA binding domain	XM_002292295.1 Thalassiosira pseudonana CCMP1335 RS1, ribosomal protein 1 (RS1), partial mRNA	RS1, ribosomal protein 1, partial [Thalassiosira pseudonana CCMP1335] >EED90306.1 RS1, ribosomal protein 1, partial [Thalassiosira pseudonana CCMP1335]	[J] LSE0381 A Plastidial ribosomal protein S1	30S ribosomal protein S1, chloroplastic OS=Spinacia oleracea GN=RPS1 PE=1 SV=1	GO:0005840//ribosome;GO:0003676//nucleic acid binding
Unigene24759_All	447	ko03010//Ribosome	Genetic Information Processing	Translation	2.50992	5.05405e-06	2.82472e-06	K02960//small subunit ribosomal protein S16e+ko03010//Ribosome;K02960//small subunit ribosomal protein S16e+ko03010//Ribosome;K02960//small subunit ribosomal protein S16e+ko03010//Ribosome;K02960//small subunit ribosomal protein S16e+ko03010//Ribosome	Ribosomal protein S9/S16	XM_002289760.1 Thalassiosira pseudonana CCMP1335 RS16, ribosomal protein 16 40S small ribosomal subunit (RS16), mRNA	RS16, ribosomal protein 16 40S small ribosomal subunit [Thalassiosira pseudonana CCMP1335] >EED93333.1 RS16, ribosomal protein 16 40S small ribosomal subunit [Thalassiosira pseudonana CCMP1335]	[J] KOG1753 40S ribosomal protein S16	40S ribosomal protein S16 OS=Oryza sativa subsp. indica GN=RPS16A PE=2 SV=1	GO:0005840//ribosome;GO:0000462//maturation of SSU-rRNA from tricistronic rRNA transcript (SSU-rRNA, 5.8S rRNA, LSU-rRNA);GO:0003723//RNA binding;GO:0006412//translation;GO:0003735//structural constituent of ribosome;GO:0022627//cytosolic small ribosomal subunit
Unigene27564_All	457	ko03010//Ribosome	Genetic Information Processing	Translation	2.33483	3.8275e-05	2.37576e-05	K02927//large subunit ribosomal protein L40e+ko03010//Ribosome;K02927//large subunit ribosomal protein L40e+ko03010//Ribosome;K02927//large subunit ribosomal protein L40e+ko03010//Ribosome;K02927//large subunit ribosomal protein L40e+ko03010//Ribosome;K02927//large subunit ribosomal protein L40e+ko03010//Ribosome	Ubiquitin family	XM_006605969.2 PREDICTED: Glycine max polyubiquitin (LOC100799042), mRNA	ubiquitin-ribosomal fusion protein, putative [Phytophthora infestans T30-4] >XP_008893308.1 ubiquitin-60S ribosomal protein L40 [Phytophthora parasitica INRA-310] >EEY55612.1 ubiquitin-ribosomal fusion protein, putative [Phytophthora infestans T30-4] >ETI45097.1 ubiquitin-60S ribosomal protein L40 [Phytophthora parasitica P1569] >ETK85074.1 ubiquitin-60S ribosomal protein L40 [Phytophthora parasi…	[J] KOG0003 Ubiquitin/60s ribosomal protein L40 fusion	Ubiquitin-60S ribosomal protein L40-2 OS=Arabidopsis thaliana GN=RPL40B PE=2 SV=2	GO:0005840//ribosome;GO:0006412//translation;GO:0003735//structural constituent of ribosome
Unigene44335_All	705	ko03010//Ribosome	Genetic Information Processing	Translation	2.33483	3.8275e-05	2.37576e-05	K02876//large subunit ribosomal protein L15+ko03010//Ribosome;K02876//large subunit ribosomal protein L15+ko03010//Ribosome;K02876//large subunit ribosomal protein L15+ko03010//Ribosome;K02876//large subunit ribosomal protein L15+ko03010//Ribosome	Ribosomal proteins 50S-L15, 50S-L18e, 60S-L27A	XM_002286840.1 Thalassiosira pseudonana CCMP1335 predicted protein partial mRNA	predicted protein, partial [Thalassiosira pseudonana CCMP1335] >EED96517.1 predicted protein, partial [Thalassiosira pseudonana CCMP1335]	[J] KOG0846 Mitochondrial/chloroplast ribosomal protein L15/L10	50S ribosomal protein L15, chloroplastic (Fragment) OS=Pisum sativum GN=RPL15 PE=2 SV=1	GO:0015934//large ribosomal subunit;GO:0006412//translation;GO:0003735//structural constituent of ribosome
Unigene27865_All	381	ko03010//Ribosome	Genetic Information Processing	Translation	2.28752	6.29698e-05	4.01079e-05	K02893//large subunit ribosomal protein L23Ae+ko03010//Ribosome;K02893//large subunit ribosomal protein L23Ae+ko03010//Ribosome;K02893//large subunit ribosomal protein L23Ae+ko03010//Ribosome;K02893//large subunit ribosomal protein L23Ae+ko03010//Ribosome;K02893//large subunit ribosomal protein L23Ae+ko03010//Ribosome	Ribosomal protein L23	XM_002291506.1 Thalassiosira pseudonana CCMP1335 RL23a, ribosomal protein 23a 60S large ribosomal subunit (RL23a), partial mRNA	RL23a, ribosomal protein 23a 60S large ribosomal subunit [Thalassiosira pseudonana CCMP1335] >EED91649.1 RL23a, ribosomal protein 23a 60S large ribosomal subunit [Thalassiosira pseudonana CCMP1335]	[J] KOG1751 60s ribosomal protein L23	60S ribosomal protein L23a OS=Nicotiana tabacum GN=RPL23A PE=2 SV=1	GO:0005840//ribosome;GO:0003723//RNA binding;GO:0000027//ribosomal large subunit assembly;GO:0006412//translation;GO:0022625//cytosolic large ribosomal subunit;GO:0003735//structural constituent of ribosome
CL3536.Contig1_All	1484	ko03010//Ribosome	Genetic Information Processing	Translation	2.25899	2.92366e-22	6.89217e-23	K02960//small subunit ribosomal protein S16e+ko03010//Ribosome;K02960//small subunit ribosomal protein S16e+ko03010//Ribosome;K02960//small subunit ribosomal protein S16e+ko03010//Ribosome;K02960//small subunit ribosomal protein S16e+ko03010//Ribosome;K02960//small subunit ribosomal protein S16e+ko03010//Ribosome	Ribosomal protein S9/S16		40s ribosomal protein s16 [Plasmopara halstedii]	[J] KOG1753 40S ribosomal protein S16	40S ribosomal protein S16 OS=Gossypium hirsutum GN=RPS16 PE=2 SV=1	GO:0005840//ribosome;GO:0006412//translation;GO:0003735//structural constituent of ribosome
Unigene26111_All	1083	ko03010//Ribosome	Genetic Information Processing	Translation	2.25317	3.47856e-11	1.2999e-11	K02906//large subunit ribosomal protein L3+ko03010//Ribosome;K02906//large subunit ribosomal protein L3+ko03010//Ribosome;K02906//large subunit ribosomal protein L3+ko03010//Ribosome;K02906//large subunit ribosomal protein L3+ko03010//Ribosome;K02906//large subunit ribosomal protein L3+ko03010//Ribosome	Ribosomal protein S10p/S20e		50S ribosomal protein L3 [Aphanomyces invadans] >ETW00440.1 50S ribosomal protein L3 [Aphanomyces invadans]	[J] KOG3141 Mitochondrial/chloroplast ribosomal protein L3	50S ribosomal protein L3, chloroplastic OS=Emiliania huxleyi GN=rpl3 PE=3 SV=1	GO:0005840//ribosome;GO:0006412//translation;GO:0003735//structural constituent of ribosome;GO:0019843//rRNA binding;GO:0009507//chloroplast
CL11193.Contig3_All	1717	ko03010//Ribosome	Genetic Information Processing	Translation	2.18802	6.19064e-19	1.62857e-19	K02868//large subunit ribosomal protein L11e+ko03010//Ribosome;K02868//large subunit ribosomal protein L11e+ko03010//Ribosome;K02868//large subunit ribosomal protein L11e+ko03010//Ribosome;K02868//large subunit ribosomal protein L11e+ko03010//Ribosome;K02868//large subunit ribosomal protein L11e+ko03010//Ribosome		XM_011398822.1 Auxenochlorella protothecoides 60S ribosomal protein L11-1 partial mRNA	hypothetical protein H632_c370p1 [Helicosporidium sp. ATCC 50920]	[J] KOG0397 60S ribosomal protein L11	60S ribosomal protein L11 OS=Oryza sativa subsp. japonica GN=RPL11 PE=2 SV=1	GO:0005840//ribosome;GO:0006412//translation;GO:0003735//structural constituent of ribosome
Unigene39162_All	917	ko03020//RNA polymerase;ko03010//Ribosome	Genetic Information Processing	Translation;Transcription	2.15322	6.59173e-06	3.73452e-06	K03040//DNA-directed RNA polymerase subunit alpha [EC:2.7.7.6]+ko03020//RNA polymerase;K02948//small subunit ribosomal protein S11+ko03010//Ribosome;K02948//small subunit ribosomal protein S11+ko03010//Ribosome;K02948//small subunit ribosomal protein S11+ko03010//Ribosome;K02948//small subunit ribosomal protein S11+ko03010//Ribosome	Ribosomal protein S11		PREDICTED: uncharacterized protein LOC103941582 [Pyrus x bretschneideri]	[J] KOG0408 Mitochondrial/chloroplast ribosomal protein S11	30S ribosomal protein S11, chloroplastic OS=Heterosigma akashiwo (strain NIES-293) GN=rps11 PE=3 SV=1	GO:0005840//ribosome;GO:0006412//translation;GO:0003735//structural constituent of ribosome;GO:0009536//plastid;GO:0019843//rRNA binding
Unigene18463_All	2929	ko03010//Ribosome	Genetic Information Processing	Translation	2.13552	2.36877e-15	7.20486e-16	K02886//large subunit ribosomal protein L2+ko03010//Ribosome;K02886//large subunit ribosomal protein L2+ko03010//Ribosome;K02886//large subunit ribosomal protein L2+ko03010//Ribosome;K02886//large subunit ribosomal protein L2+ko03010//Ribosome;K02886//large subunit ribosomal protein L2+ko03010//Ribosome	Ribosomal Proteins L2, C-terminal domain		hypothetical protein PAHAL_J02207 [Panicum hallii]	[J] KOG0438 Mitochondrial/chloroplast ribosomal protein L2	50S ribosomal protein L2, chloroplastic OS=Chara vulgaris GN=rpl2 PE=3 SV=1
Unigene796_All	1662	ko03010//Ribosome	Genetic Information Processing	Translation	2.04059	5.6262e-66	6.21342e-67	K02868//large subunit ribosomal protein L11e+ko03010//Ribosome;K02868//large subunit ribosomal protein L11e+ko03010//Ribosome;K02868//large subunit ribosomal protein L11e+ko03010//Ribosome;K02868//large subunit ribosomal protein L11e+ko03010//Ribosome;K02868//large subunit ribosomal protein L11e+ko03010//Ribosome	ribosomal L5P family C-terminus	XM_011398822.1 Auxenochlorella protothecoides 60S ribosomal protein L11-1 partial mRNA	hypothetical protein H632_c370p1 [Helicosporidium sp. ATCC 50920]	[J] KOG0397 60S ribosomal protein L11	60S ribosomal protein L11-1 OS=Arabidopsis thaliana GN=RPL11A PE=2 SV=2	GO:0005840//ribosome;GO:0006412//translation;GO:0003735//structural constituent of ribosome
Unigene31658_All	644	ko03010//Ribosome	Genetic Information Processing	Translation	2.02449	0.000687552	0.000515299	K02985//small subunit ribosomal protein S3e+ko03010//Ribosome;K02985//small subunit ribosomal protein S3e+ko03010//Ribosome;K02985//small subunit ribosomal protein S3e+ko03010//Ribosome;K02985//small subunit ribosomal protein S3e+ko03010//Ribosome;K02985//small subunit ribosomal protein S3e+ko03010//Ribosome	Ribosomal protein S3, C-terminal domain		hypothetical protein THAOC_35575 [Thalassiosira oceanica]	[J] KOG3181 40S ribosomal protein S3	40S ribosomal protein S3-2 OS=Arabidopsis thaliana GN=RPS3B PE=1 SV=1	GO:0003723//RNA binding;GO:0005634//nucleus;GO:0006281//DNA repair;GO:0002181//cytoplasmic translation;GO:0015935//small ribosomal subunit;GO:0003684//damaged DNA binding;GO:0006412//translation;GO:0022627//cytosolic small ribosomal subunit;GO:0003735//structural constituent of ribosome;GO:0008534//oxidized purine nucleobase lesion DNA N-glycosylase activity
Unigene3425_All	477	ko03010//Ribosome	Genetic Information Processing	Translation	2.02449	0.000687552	0.000515299	K02875//large subunit ribosomal protein L14e+ko03010//Ribosome;K02875//large subunit ribosomal protein L14e+ko03010//Ribosome;K02875//large subunit ribosomal protein L14e+ko03010//Ribosome;K02875//large subunit ribosomal protein L14e+ko03010//Ribosome;K02875//large subunit ribosomal protein L14e+ko03010//Ribosome	Ribosomal protein L14		RL14, ribosomal protein 14 60S large ribosomal subunit [Thalassiosira pseudonana CCMP1335] >EED94727.1 RL14, ribosomal protein 14 60S large ribosomal subunit [Thalassiosira pseudonana CCMP1335]	[J] KOG3421 60S ribosomal protein L14	60S ribosomal protein L14-1 OS=Arabidopsis thaliana GN=RPL14A PE=2 SV=1	GO:0005840//ribosome;GO:0003723//RNA binding;GO:0006412//translation;GO:0022625//cytosolic large ribosomal subunit;GO:0003735//structural constituent of ribosome;GO:0042273//ribosomal large subunit biogenesis
CL10686.Contig4_All	985	ko03010//Ribosome	Genetic Information Processing	Translation	1.95092	3.20908e-89	2.83986e-90	K02951//small subunit ribosomal protein S12e+ko03010//Ribosome;K02951//small subunit ribosomal protein S12e+ko03010//Ribosome;K02951//small subunit ribosomal protein S12e+ko03010//Ribosome;K02951//small subunit ribosomal protein S12e+ko03010//Ribosome;K02951//small subunit ribosomal protein S12e+ko03010//Ribosome			hypothetical protein THAOC_03450 [Thalassiosira oceanica]	[J] KOG3406 40S ribosomal protein S12	40S ribosomal protein S12 OS=Cyanophora paradoxa GN=RPS12 PE=2 SV=1	GO:0005840//ribosome;GO:0006412//translation;GO:0003735//structural constituent of ribosome
CL7055.Contig2_All	1162	ko03010//Ribosome	Genetic Information Processing	Translation	1.93011	1.64762e-26	3.47017e-27	K02893//large subunit ribosomal protein L23Ae+ko03010//Ribosome;K02893//large subunit ribosomal protein L23Ae+ko03010//Ribosome;K02893//large subunit ribosomal protein L23Ae+ko03010//Ribosome;K02893//large subunit ribosomal protein L23Ae+ko03010//Ribosome;K02893//large subunit ribosomal protein L23Ae+ko03010//Ribosome		XM_002907552.1 Phytophthora infestans T30-4 60S ribosomal protein L23a (PITG_02694) mRNA, complete cds	60S ribosomal protein [Aureococcus anophagefferens] >EGB03495.1 60S ribosomal protein [Aureococcus anophagefferens]	[J] KOG1751 60s ribosomal protein L23	60S ribosomal protein L23a OS=Nicotiana tabacum GN=RPL23A PE=2 SV=1	GO:0005840//ribosome;GO:0006412//translation;GO:0003735//structural constituent of ribosome
Unigene20465_All	563	ko03010//Ribosome	Genetic Information Processing	Translation	1.91313	0.000679134	0.000507351	K02880//large subunit ribosomal protein L17e+ko03010//Ribosome;K02880//large subunit ribosomal protein L17e+ko03010//Ribosome;K02880//large subunit ribosomal protein L17e+ko03010//Ribosome;K02880//large subunit ribosomal protein L17e+ko03010//Ribosome	Ribosomal protein L22p/L17e	XM_002288331.1 Thalassiosira pseudonana CCMP1335 RL17, ribosomal protein 17-like 60S large ribosomal subunit (RL17), partial mRNA	RL17, ribosomal protein 17-like 60S large ribosomal subunit, partial [Thalassiosira pseudonana CCMP1335] >EED93803.1 RL17, ribosomal protein 17-like 60S large ribosomal subunit, partial [Thalassiosira pseudonana CCMP1335]	[J] KOG3353 60S ribosomal protein L22	60S ribosomal protein L17-2 OS=Hordeum vulgare PE=2 SV=1	GO:0015934//large ribosomal subunit;GO:0006412//translation;GO:0003735//structural constituent of ribosome
Unigene19746_All	1025	ko03010//Ribosome	Genetic Information Processing	Translation	1.85541	3.92723e-07	1.96604e-07	K02930//large subunit ribosomal protein L4e+ko03010//Ribosome;K02930//large subunit ribosomal protein L4e+ko03010//Ribosome;K02930//large subunit ribosomal protein L4e+ko03010//Ribosome;K02930//large subunit ribosomal protein L4e+ko03010//Ribosome;K02930//large subunit ribosomal protein L4e+ko03010//Ribosome	Ribosomal protein L4/L1 family	XM_002290087.1 Thalassiosira pseudonana CCMP1335 RL4e, ribosomal protein 4e 60S large ribosomal subunit (RL4e), partial mRNA	hypothetical protein THAOC_03561 [Thalassiosira oceanica]	[A] KOG1475 Ribosomal protein RPL1/RPL2/RL4L4	60S ribosomal protein L4-2 OS=Arabidopsis thaliana GN=RPL4D PE=1 SV=2	GO:0003723//RNA binding;GO:0002181//cytoplasmic translation;GO:0022625//cytosolic large ribosomal subunit;GO:0003735//structural constituent of ribosome
CL2408.Contig1_All	815	ko03010//Ribosome	Genetic Information Processing	Translation	1.82131	9.72286e-17	2.79441e-17	K02962//small subunit ribosomal protein S17e+ko03010//Ribosome;K02962//small subunit ribosomal protein S17e+ko03010//Ribosome;K02962//small subunit ribosomal protein S17e+ko03010//Ribosome;K02962//small subunit ribosomal protein S17e+ko03010//Ribosome		XM_001759861.1 Physcomitrella patens subsp. patens predicted protein (PHYPADRAFT_207482) mRNA, complete cds	40S ribosomal protein S17 [Ectocarpus siliculosus]	[J] KOG0187 40S ribosomal protein S17	40S ribosomal protein S17-1 OS=Arabidopsis thaliana GN=RPS17A PE=2 SV=3	GO:0005840//ribosome;GO:0006412//translation;GO:0003735//structural constituent of ribosome
Unigene43139_All	672	ko03010//Ribosome	Genetic Information Processing	Translation	1.78872	2.40329e-05	1.45404e-05	K02997//small subunit ribosomal protein S9e+ko03010//Ribosome;K02997//small subunit ribosomal protein S9e+ko03010//Ribosome;K02997//small subunit ribosomal protein S9e+ko03010//Ribosome;K02997//small subunit ribosomal protein S9e+ko03010//Ribosome;K02997//small subunit ribosomal protein S9e+ko03010//Ribosome	S4 domain	XM_002289670.1 Thalassiosira pseudonana CCMP1335 RS9, ribosomal protein 9 (RS9), mRNA	hypothetical protein THAOC_06697 [Thalassiosira oceanica]	[J] KOG3301 Ribosomal protein S4	40S ribosomal protein S9-2 OS=Arabidopsis thaliana GN=RPS9C PE=1 SV=1	GO:0006412//translation;GO:0003735//structural constituent of ribosome;GO:0022627//cytosolic small ribosomal subunit;GO:0015935//small ribosomal subunit;GO:0045903//positive regulation of translational fidelity;GO:0019843//rRNA binding
Unigene51721_All	830	ko03010//Ribosome	Genetic Information Processing	Translation	1.78872	2.40329e-05	1.45404e-05	K02987//small subunit ribosomal protein S4e+ko03010//Ribosome;K02987//small subunit ribosomal protein S4e+ko03010//Ribosome;K02987//small subunit ribosomal protein S4e+ko03010//Ribosome;K02987//small subunit ribosomal protein S4e+ko03010//Ribosome	Ribosomal family S4e	XM_003063958.1 Micromonas pusilla CCMP1545 predicted protein, mRNA	RS4, ribosomal protein 4 [Thalassiosira pseudonana CCMP1335] >EED95523.1 RS4, ribosomal protein 4 [Thalassiosira pseudonana CCMP1335]	[J] KOG0378 40S ribosomal protein S4	40S ribosomal protein S4 OS=Gossypium hirsutum GN=RPS4 PE=2 SV=1	GO:0005840//ribosome;GO:0003723//RNA binding;GO:0006412//translation;GO:0003735//structural constituent of ribosome;GO:0022627//cytosolic small ribosomal subunit;GO:0019843//rRNA binding
CL7656.Contig2_All	1728	ko04626//Plant-pathogen interaction;ko04016//MAPK signaling pathway - plant;ko03010//Ribosome	Organismal Systems;Environmental Information Processing;Genetic Information Processing	Signal transduction;Translation;Environmental adaptation	1.76086	2.32761e-26	4.91358e-27	K19613//leucine-rich repeat protein SHOC2;K02978//small subunit ribosomal protein S27e+ko03010//Ribosome;K13420//LRR receptor-like serine/threonine-protein kinase FLS2 [EC:2.7.11.1]+ko04016//MAPK signaling pathway - plant+ko04626//Plant-pathogen interaction	Leucine Rich repeats (2 copies)		hypothetical protein SDRG_01046 [Saprolegnia diclina VS20] >EQC42208.1 hypothetical protein SDRG_01046 [Saprolegnia diclina VS20]	[R] KOG0619 FOG: Leucine rich repeat	Dynein regulatory complex subunit 7 (Fragment) OS=Chlamydomonas reinhardtii GN=DRC7 PE=1 SV=1
Unigene45962_All	1633	ko03010//Ribosome	Genetic Information Processing	Translation	1.75419	3.60373e-177	1.90477e-178	K02868//large subunit ribosomal protein L11e+ko03010//Ribosome;K02868//large subunit ribosomal protein L11e+ko03010//Ribosome;K02868//large subunit ribosomal protein L11e+ko03010//Ribosome;K02868//large subunit ribosomal protein L11e+ko03010//Ribosome;K02868//large subunit ribosomal protein L11e+ko03010//Ribosome		XM_011398822.1 Auxenochlorella protothecoides 60S ribosomal protein L11-1 partial mRNA	hypothetical protein H632_c370p1 [Helicosporidium sp. ATCC 50920]	[J] KOG0397 60S ribosomal protein L11	60S ribosomal protein L11 OS=Oryza sativa subsp. indica GN=RPL11 PE=2 SV=2	GO:0005840//ribosome;GO:0006412//translation;GO:0003735//structural constituent of ribosome
CL719.Contig1_All	1301	ko03010//Ribosome	Genetic Information Processing	Translation	1.71938	0	0	K02920//large subunit ribosomal protein L36e+ko03010//Ribosome;K02920//large subunit ribosomal protein L36e+ko03010//Ribosome;K02920//large subunit ribosomal protein L36e+ko03010//Ribosome;K02920//large subunit ribosomal protein L36e+ko03010//Ribosome;K02920//large subunit ribosomal protein L36e+ko03010//Ribosome	Ribosomal protein L36e		60S ribosomal protein L36 [Ectocarpus siliculosus]	[J] KOG3452 60S ribosomal protein L36	60S ribosomal protein L36-2 OS=Arabidopsis thaliana GN=RPL36B PE=3 SV=1	GO:0005840//ribosome;GO:0003723//RNA binding;GO:0002181//cytoplasmic translation;GO:0006412//translation;GO:0022625//cytosolic large ribosomal subunit;GO:0003735//structural constituent of ribosome
CL9108.Contig2_All	1411	ko03010//Ribosome	Genetic Information Processing	Translation	1.67575	0	0	K02945//small subunit ribosomal protein S1+ko03010//Ribosome;K02945//small subunit ribosomal protein S1+ko03010//Ribosome;K02945//small subunit ribosomal protein S1+ko03010//Ribosome;K02945//small subunit ribosomal protein S1+ko03010//Ribosome	S1 RNA binding domain		predicted protein, partial [Phaeodactylum tricornutum CCAP 1055/1] >EEC49926.1 predicted protein, partial [Phaeodactylum tricornutum CCAP 1055/1]	[GO] KOG4157 beta-1,6-N-acetylglucosaminyltransferase, contains WSC domain	Serine/arginine-rich splicing factor SR45 OS=Arabidopsis thaliana GN=SR45 PE=1 SV=1	GO:0005840//ribosome;GO:0003676//nucleic acid binding
CL7055.Contig3_All	1490	ko03010//Ribosome	Genetic Information Processing	Translation	1.66959	2.43768e-75	2.44157e-76	K02893//large subunit ribosomal protein L23Ae+ko03010//Ribosome;K02893//large subunit ribosomal protein L23Ae+ko03010//Ribosome;K02893//large subunit ribosomal protein L23Ae+ko03010//Ribosome;K02893//large subunit ribosomal protein L23Ae+ko03010//Ribosome;K02893//large subunit ribosomal protein L23Ae+ko03010//Ribosome	Protein of unknown function (DUF1422)	XM_008899006.1 Phytophthora parasitica INRA-310 60S ribosomal protein L23a mRNA	60S ribosomal protein [Aureococcus anophagefferens] >EGB03495.1 60S ribosomal protein [Aureococcus anophagefferens]	[J] KOG1751 60s ribosomal protein L23	60S ribosomal protein L23a OS=Nicotiana tabacum GN=RPL23A PE=2 SV=1	GO:0005840//ribosome;GO:0003723//RNA binding;GO:0000027//ribosomal large subunit assembly;GO:0006412//translation;GO:0022625//cytosolic large ribosomal subunit;GO:0003735//structural constituent of ribosome
Unigene45862_All	1020	ko03010//Ribosome	Genetic Information Processing	Translation	1.66152	4.63384e-135	3.05129e-136	K02896//large subunit ribosomal protein L24e+ko03010//Ribosome;K02896//large subunit ribosomal protein L24e+ko03010//Ribosome	Ribosomal protein L24e		ribosome biogenesis protein RLP24 [Thraustotheca clavata]	[J] KOG1723 60s ribosomal protein L30 isolog	Probable ribosome biogenesis protein RLP24 OS=Arabidopsis thaliana GN=At2g44860 PE=1 SV=1	GO:0003723//RNA binding;GO:1902626//assembly of large subunit precursor of preribosome;GO:0006412//translation;GO:0000027//ribosomal large subunit assembly;GO:0022625//cytosolic large ribosomal subunit;GO:0003735//structural constituent of ribosome
CL3894.Contig2_All	861	ko03010//Ribosome	Genetic Information Processing	Translation	1.64431	2.08924e-27	4.29735e-28	K02910//large subunit ribosomal protein L31e+ko03010//Ribosome;K02910//large subunit ribosomal protein L31e+ko03010//Ribosome;K02910//large subunit ribosomal protein L31e+ko03010//Ribosome;K02910//large subunit ribosomal protein L31e+ko03010//Ribosome;K02910//large subunit ribosomal protein L31e+ko03010//Ribosome			60S ribosomal protein L31 [Aphanomyces astaci] >ETV89407.1 60S ribosomal protein L31 [Aphanomyces astaci]	[J] KOG0893 60S ribosomal protein L31	60S ribosomal protein L31 OS=Cyanophora paradoxa GN=RPL31 PE=3 SV=1	GO:0005840//ribosome;GO:0006412//translation;GO:0003735//structural constituent of ribosome
CL2408.Contig2_All	1213	ko03010//Ribosome	Genetic Information Processing	Translation	1.61127	4.42168e-20	1.11955e-20	K02962//small subunit ribosomal protein S17e+ko03010//Ribosome;K02962//small subunit ribosomal protein S17e+ko03010//Ribosome;K02962//small subunit ribosomal protein S17e+ko03010//Ribosome;K02962//small subunit ribosomal protein S17e+ko03010//Ribosome		XM_001759861.1 Physcomitrella patens subsp. patens predicted protein (PHYPADRAFT_207482) mRNA, complete cds	40S ribosomal protein S17 [Ectocarpus siliculosus]	[J] KOG0187 40S ribosomal protein S17	40S ribosomal protein S17-1 OS=Arabidopsis thaliana GN=RPS17A PE=2 SV=3	GO:0005840//ribosome;GO:0006412//translation;GO:0003735//structural constituent of ribosome
CL3894.Contig3_All	716	ko03010//Ribosome	Genetic Information Processing	Translation	1.59241	2.2765e-30	4.36615e-31	K02910//large subunit ribosomal protein L31e+ko03010//Ribosome;K02910//large subunit ribosomal protein L31e+ko03010//Ribosome;K02910//large subunit ribosomal protein L31e+ko03010//Ribosome;K02910//large subunit ribosomal protein L31e+ko03010//Ribosome;K02910//large subunit ribosomal protein L31e+ko03010//Ribosome		XM_008892044.1 Phytophthora parasitica INRA-310 hypothetical protein mRNA	60s ribosomal protein l31 [Plasmopara halstedii]	[J] KOG0893 60S ribosomal protein L31	60S ribosomal protein L31 OS=Cyanophora paradoxa GN=RPL31 PE=3 SV=1	GO:0005840//ribosome;GO:0002181//cytoplasmic translation;GO:0006412//translation;GO:0022625//cytosolic large ribosomal subunit;GO:0003735//structural constituent of ribosome
Unigene6197_All	1848	ko03010//Ribosome	Genetic Information Processing	Translation	1.5884	1.50668e-11	5.51391e-12	K02983//small subunit ribosomal protein S30e+ko03010//Ribosome;K02983//small subunit ribosomal protein S30e+ko03010//Ribosome;K02983//small subunit ribosomal protein S30e+ko03010//Ribosome;K02983//small subunit ribosomal protein S30e+ko03010//Ribosome;K02983//small subunit ribosomal protein S30e+ko03010//Ribosome			conserved unknown protein [Ectocarpus siliculosus]	[JO] KOG0009 Ubiquitin-like/40S ribosomal S30 protein fusion	40S ribosomal protein S30 OS=Arabidopsis thaliana GN=RPS30A PE=3 SV=3	GO:0005840//ribosome;GO:0006412//translation;GO:0003735//structural constituent of ribosome
CL7815.Contig2_All	2762	ko03010//Ribosome	Genetic Information Processing	Translation	1.57746	3.58162e-193	1.76197e-194	K02863//large subunit ribosomal protein L1+ko03010//Ribosome;K02863//large subunit ribosomal protein L1+ko03010//Ribosome;K02863//large subunit ribosomal protein L1+ko03010//Ribosome;K02863//large subunit ribosomal protein L1+ko03010//Ribosome;K02863//large subunit ribosomal protein L1+ko03010//Ribosome	Ribosomal protein L1p/L10e family	LC269922.1 Heterosigma akashiwo chloroplast DNA, complete genome, isolate: CCMP3374	ribosomal protein L1 [Heterosigma akashiwo] >ABV65936.1 50S ribosomal protein L1 (chloroplast) [Heterosigma akashiwo] >ABV70081.1 50S ribosomal protein L1 (chloroplast) [Heterosigma akashiwo] >BBA18152.1 50S ribosomal protein L1 (chloroplast) [Heterosigma akashiwo] >BBA18293.1 50S ribosomal protein L1 (chloroplast) [Heterosigma akashiwo] >BBA18432.1 50S ribosomal protein L1 (chloroplast) [Heteros…	[J] KOG3257 Mitochondrial/chloroplast ribosomal protein L11	50S ribosomal protein L1, chloroplastic OS=Phaeodactylum tricornutum (strain CCAP 1055/1) GN=rpl1 PE=3 SV=1	GO:0015934//large ribosomal subunit;GO:0006412//translation;GO:0003735//structural constituent of ribosome;GO:0019843//rRNA binding;GO:0009507//chloroplast
CL736.Contig2_All	512	ko03010//Ribosome	Genetic Information Processing	Translation	1.54651	1.74294e-22	4.07932e-23	K02936//large subunit ribosomal protein L7Ae+ko03010//Ribosome;K02936//large subunit ribosomal protein L7Ae+ko03010//Ribosome;K02936//large subunit ribosomal protein L7Ae+ko03010//Ribosome;K02936//large subunit ribosomal protein L7Ae+ko03010//Ribosome;K02936//large subunit ribosomal protein L7Ae+ko03010//Ribosome	Glutamyl-tRNAGlu reductase, dimerisation domain		hypothetical protein AURANDRAFT_5527, partial [Aureococcus anophagefferens] >EGB11038.1 hypothetical protein AURANDRAFT_5527, partial [Aureococcus anophagefferens]	[J] KOG3166 60S ribosomal protein L7A	60S ribosomal protein L7a-1 OS=Arabidopsis thaliana GN=RPL7AA PE=2 SV=2	GO:0005840//ribosome;GO:0042254//ribosome biogenesis;GO:0030529//intracellular ribonucleoprotein complex
Unigene38003_All	650	ko03010//Ribosome	Genetic Information Processing	Translation	1.51449	2.76959e-12	9.72411e-13	K02957//small subunit ribosomal protein S15Ae+ko03010//Ribosome;K02957//small subunit ribosomal protein S15Ae+ko03010//Ribosome			hypothetical protein AURANDRAFT_24204 [Aureococcus anophagefferens] >EGB09455.1 hypothetical protein AURANDRAFT_24204 [Aureococcus anophagefferens]	[J] KOG1754 40S ribosomal protein S15/S22	40S ribosomal protein S15a-1 OS=Arabidopsis thaliana GN=RPS15AA PE=2 SV=2	GO:0005840//ribosome;GO:0006412//translation;GO:0003735//structural constituent of ribosome
CL7656.Contig1_All	1684	ko04626//Plant-pathogen interaction;ko04016//MAPK signaling pathway - plant;ko03010//Ribosome	Genetic Information Processing;Environmental Information Processing;Organismal Systems	Signal transduction;Translation;Environmental adaptation	1.46203	4.94795e-34	8.79514e-35	K19613//leucine-rich repeat protein SHOC2;K02978//small subunit ribosomal protein S27e+ko03010//Ribosome;K13420//LRR receptor-like serine/threonine-protein kinase FLS2 [EC:2.7.11.1]+ko04016//MAPK signaling pathway - plant+ko04626//Plant-pathogen interaction	Leucine Rich repeats (2 copies)		hypothetical protein SDRG_01046 [Saprolegnia diclina VS20] >EQC42208.1 hypothetical protein SDRG_01046 [Saprolegnia diclina VS20]	[R] KOG0619 FOG: Leucine rich repeat	Dynein regulatory complex subunit 7 (Fragment) OS=Chlamydomonas reinhardtii GN=DRC7 PE=1 SV=1
CL294.Contig3_All	671	ko03010//Ribosome	Genetic Information Processing	Translation	1.43221	3.27839e-184	1.67874e-185	K02957//small subunit ribosomal protein S15Ae+ko03010//Ribosome;K02957//small subunit ribosomal protein S15Ae+ko03010//Ribosome;K02957//small subunit ribosomal protein S15Ae+ko03010//Ribosome;K02957//small subunit ribosomal protein S15Ae+ko03010//Ribosome	Ribosomal protein S8	XM_020304235.1 PREDICTED: Aegilops tauschii subsp. tauschii 40S ribosomal protein S15a-1 (LOC109745097), mRNA	hypothetical protein AURANDRAFT_24204 [Aureococcus anophagefferens] >EGB09455.1 hypothetical protein AURANDRAFT_24204 [Aureococcus anophagefferens]	[J] KOG1754 40S ribosomal protein S15/S22	40S ribosomal protein S15a-1 OS=Arabidopsis thaliana GN=RPS15AA PE=2 SV=2	GO:0005840//ribosome;GO:0006412//translation;GO:0003735//structural constituent of ribosome
CL2177.Contig1_All	1104	ko03010//Ribosome	Genetic Information Processing	Translation	1.42999	1.09627e-232	4.67873e-234	K02902//large subunit ribosomal protein L28+ko03010//Ribosome;K02902//large subunit ribosomal protein L28+ko03010//Ribosome;K02902//large subunit ribosomal protein L28+ko03010//Ribosome;K02902//large subunit ribosomal protein L28+ko03010//Ribosome;K02902//large subunit ribosomal protein L28+ko03010//Ribosome	Ribosomal L28 family		large subunit ribosomal protein L28 [Fistulifera solaris]		50S ribosomal protein L28, chloroplastic OS=Nicotiana tabacum GN=RPL28 PE=1 SV=1	GO:0022625//cytosolic large ribosomal subunit;GO:0003735//structural constituent of ribosome
CL3776.Contig3_All	1182	ko03010//Ribosome	Genetic Information Processing	Translation	1.37701	3.63593e-54	4.6253e-55	K02966//small subunit ribosomal protein S19e+ko03010//Ribosome;K02966//small subunit ribosomal protein S19e+ko03010//Ribosome;K02966//small subunit ribosomal protein S19e+ko03010//Ribosome;K02966//small subunit ribosomal protein S19e+ko03010//Ribosome	Ribosomal protein S19e		conserved unknown protein [Ectocarpus siliculosus]	[J] KOG3411 40S ribosomal protein S19	40S ribosomal protein S19-3 OS=Arabidopsis thaliana GN=RPS19C PE=2 SV=1	GO:0005840//ribosome;GO:0006412//translation;GO:0003735//structural constituent of ribosome
Unigene18191_All	1618	ko03010//Ribosome	Genetic Information Processing	Translation	1.35414	1.41323e-212	6.46634e-214	K02935//large subunit ribosomal protein L7/L12+ko03010//Ribosome;K02935//large subunit ribosomal protein L7/L12+ko03010//Ribosome;K02935//large subunit ribosomal protein L7/L12+ko03010//Ribosome;K02935//large subunit ribosomal protein L7/L12+ko03010//Ribosome;K02935//large subunit ribosomal protein L7/L12+ko03010//Ribosome	Ribosomal protein L7/L12 C-terminal domain		Ribosomal protein L7/L12 [Phytophthora megakarya]	[J] KOG1715 Mitochondrial/chloroplast ribosomal protein L12	50S ribosomal protein L12, chloroplastic OS=Spinacia oleracea GN=RPL12 PE=1 SV=2	GO:0005840//ribosome;GO:0005762//mitochondrial large ribosomal subunit;GO:0032543//mitochondrial translation;GO:0006412//translation;GO:0016021//integral component of membrane;GO:0003735//structural constituent of ribosome;GO:0006839//mitochondrial transport
CL6149.Contig2_All	667	ko03010//Ribosome	Genetic Information Processing	Translation	1.34559	0	0	K02980//small subunit ribosomal protein S29e+ko03010//Ribosome;K02980//small subunit ribosomal protein S29e+ko03010//Ribosome;K02980//small subunit ribosomal protein S29e+ko03010//Ribosome;K02980//small subunit ribosomal protein S29e+ko03010//Ribosome;K02980//small subunit ribosomal protein S29e+ko03010//Ribosome			unknown [Picea sitchensis] >ABK21257.1 unknown [Picea sitchensis] >ABK25647.1 unknown [Picea sitchensis] >ACN40428.1 unknown [Picea sitchensis]	[J] KOG3506 40S ribosomal protein S29	40S ribosomal protein S29 OS=Arabidopsis thaliana GN=RPS29A PE=3 SV=2	GO:0005840//ribosome;GO:0006412//translation;GO:0003735//structural constituent of ribosome
CL5630.Contig3_All	1634	ko03010//Ribosome	Genetic Information Processing	Translation	1.34197	7.22443e-16	2.15016e-16	K02879//large subunit ribosomal protein L17+ko03010//Ribosome;K02879//large subunit ribosomal protein L17+ko03010//Ribosome;K02879//large subunit ribosomal protein L17+ko03010//Ribosome;K02879//large subunit ribosomal protein L17+ko03010//Ribosome	Ribosomal protein L17		hypothetical protein THAOC_03655 [Thalassiosira oceanica]	[J] KOG3280 Mitochondrial/chloroplast ribosomal protein L17	50S ribosomal protein L17, chloroplastic OS=Arabidopsis thaliana GN=RPL17 PE=2 SV=1	GO:0006412//translation;GO:0022625//cytosolic large ribosomal subunit;GO:0003735//structural constituent of ribosome
Unigene41534_All	1099	ko03010//Ribosome	Genetic Information Processing	Translation	1.34194	4.43874e-35	7.71058e-36	K02969//small subunit ribosomal protein S20e+ko03010//Ribosome;K02969//small subunit ribosomal protein S20e+ko03010//Ribosome;K02969//small subunit ribosomal protein S20e+ko03010//Ribosome			40s ribosomal protein s20 [Plasmopara halstedii]	[J] KOG0900 40S ribosomal protein S20	40S ribosomal protein S20-2 OS=Arabidopsis thaliana GN=RPS20B PE=2 SV=1	GO:0003723//RNA binding;GO:0006412//translation;GO:0003735//structural constituent of ribosome;GO:0015935//small ribosomal subunit
CL9646.Contig2_All	879	ko03010//Ribosome	Genetic Information Processing	Translation	1.32261	2.38773e-29	4.68608e-30	K02995//small subunit ribosomal protein S8e+ko03010//Ribosome;K02995//small subunit ribosomal protein S8e+ko03010//Ribosome;K02995//small subunit ribosomal protein S8e+ko03010//Ribosome;K02995//small subunit ribosomal protein S8e+ko03010//Ribosome;K02995//small subunit ribosomal protein S8e+ko03010//Ribosome	Ribosomal protein S8e		conserved unknown protein [Ectocarpus siliculosus]	[J] KOG3283 40S ribosomal protein S8	40S ribosomal protein S8 OS=Zea mays GN=RPS8 PE=2 SV=2	GO:0005840//ribosome;GO:0006412//translation;GO:0003735//structural constituent of ribosome
Unigene26943_All	1208	ko03010//Ribosome	Genetic Information Processing	Translation	1.31964	3.61176e-157	2.1095e-158	K02945//small subunit ribosomal protein S1+ko03010//Ribosome;K02945//small subunit ribosomal protein S1+ko03010//Ribosome;K02945//small subunit ribosomal protein S1+ko03010//Ribosome;K02945//small subunit ribosomal protein S1+ko03010//Ribosome;K02945//small subunit ribosomal protein S1+ko03010//Ribosome	S1 RNA binding domain	LC269922.1 Heterosigma akashiwo chloroplast DNA, complete genome, isolate: CCMP3374	30S ribosomal protein S1 [Heterosigma akashiwo] >ABV65943.1 30S ribosomal protein S1 (chloroplast) [Heterosigma akashiwo] >ABV70084.1 30S ribosomal protein S1 (chloroplast) [Heterosigma akashiwo] >BBA18157.1 30S ribosomal protein S1 (chloroplast) [Heterosigma akashiwo] >BBA18296.1 30S ribosomal protein S1 (chloroplast) [Heterosigma akashiwo] >BBA18435.1 30S ribosomal protein S1 (chloroplast) [Het…	[J] LSE0381 A Plastidial ribosomal protein S1	Uncharacterized protein ycf40 OS=Odontella sinensis GN=ycf40 PE=3 SV=1	GO:0005840//ribosome;GO:0009536//plastid;GO:0003676//nucleic acid binding;GO:0009507//chloroplast
Unigene23444_All	940	ko03010//Ribosome	Genetic Information Processing	Translation	1.30634	2.98246e-54	3.78921e-55	K02873//large subunit ribosomal protein L13e+ko03010//Ribosome;K02873//large subunit ribosomal protein L13e+ko03010//Ribosome;K02873//large subunit ribosomal protein L13e+ko03010//Ribosome;K02873//large subunit ribosomal protein L13e+ko03010//Ribosome;K02873//large subunit ribosomal protein L13e+ko03010//Ribosome	Ribosomal protein L13e		conserved unknown protein [Ectocarpus siliculosus]	[J] KOG3295 60S Ribosomal protein L13	60S ribosomal protein L13-3 OS=Arabidopsis thaliana GN=RPL13D PE=1 SV=1	GO:0005840//ribosome;GO:0006412//translation;GO:0003735//structural constituent of ribosome
CL762.Contig2_All	812	ko03010//Ribosome	Genetic Information Processing	Translation	1.26136	1.94465e-09	8.11722e-10	K02986//small subunit ribosomal protein S4+ko03010//Ribosome;K02986//small subunit ribosomal protein S4+ko03010//Ribosome;K02986//small subunit ribosomal protein S4+ko03010//Ribosome;K02986//small subunit ribosomal protein S4+ko03010//Ribosome;K02986//small subunit ribosomal protein S4+ko03010//Ribosome	Ribosomal protein S4/S9 N-terminal domain	LC269924.1 Heterosigma akashiwo chloroplast DNA, complete genome, isolate: CCMP1596	30S ribosomal protein S4 [Heterosigma akashiwo] >ABV65945.1 30S ribosomal protein S4 (chloroplast) [Heterosigma akashiwo] >ABV70086.1 30S ribosomal protein S4 (chloroplast) [Heterosigma akashiwo] >BBA18159.1 30S ribosomal protein S4 (chloroplast) [Heterosigma akashiwo] >BBA18298.1 30S ribosomal protein S4 (chloroplast) [Heterosigma akashiwo] >BBA18437.1 30S ribosomal protein S4 (chloroplast) [Het…	[J] KOG3301 Ribosomal protein S4	Cyanelle 30S ribosomal protein S4 OS=Cyanophora paradoxa GN=rps4 PE=3 SV=1	GO:0006412//translation;GO:0003735//structural constituent of ribosome;GO:0009842//cyanelle;GO:0015935//small ribosomal subunit;GO:0019843//rRNA binding;GO:0009507//chloroplast
CL8567.Contig1_All	1334	ko03010//Ribosome	Genetic Information Processing	Translation	1.2521	0	0	K02938//large subunit ribosomal protein L8e+ko03010//Ribosome;K02938//large subunit ribosomal protein L8e+ko03010//Ribosome;K02938//large subunit ribosomal protein L8e+ko03010//Ribosome	Ribosomal Proteins L2, C-terminal domain	XM_020308595.1 PREDICTED: Aegilops tauschii subsp. tauschii 60S ribosomal protein L8 (LOC109749644), mRNA	hypothetical protein AURANDRAFT_54227 [Aureococcus anophagefferens] >EGB06450.1 hypothetical protein AURANDRAFT_54227 [Aureococcus anophagefferens]	[J] KOG2309 60s ribosomal protein L2/L8	60S ribosomal protein L8 OS=Solanum lycopersicum GN=RPL8 PE=2 SV=1	GO:0005840//ribosome;GO:0003723//RNA binding;GO:0015934//large ribosomal subunit;GO:0006412//translation;GO:0003735//structural constituent of ribosome
CL11193.Contig4_All	1217	ko03010//Ribosome	Genetic Information Processing	Translation	1.2479	2.23115e-46	3.16809e-47	K02868//large subunit ribosomal protein L11e+ko03010//Ribosome;K02868//large subunit ribosomal protein L11e+ko03010//Ribosome;K02868//large subunit ribosomal protein L11e+ko03010//Ribosome;K02868//large subunit ribosomal protein L11e+ko03010//Ribosome;K02868//large subunit ribosomal protein L11e+ko03010//Ribosome		XM_011398822.1 Auxenochlorella protothecoides 60S ribosomal protein L11-1 partial mRNA	hypothetical protein H632_c370p1 [Helicosporidium sp. ATCC 50920]	[J] KOG0397 60S ribosomal protein L11	60S ribosomal protein L11 OS=Oryza sativa subsp. japonica GN=RPL11 PE=2 SV=1	GO:0005840//ribosome;GO:0006412//translation;GO:0003735//structural constituent of ribosome
Unigene35999_All	578	ko03010//Ribosome	Genetic Information Processing	Translation	1.23885	0	0	K02953//small subunit ribosomal protein S13e+ko03010//Ribosome;K02953//small subunit ribosomal protein S13e+ko03010//Ribosome;K02953//small subunit ribosomal protein S13e+ko03010//Ribosome;K02953//small subunit ribosomal protein S13e+ko03010//Ribosome;K02953//small subunit ribosomal protein S13e+ko03010//Ribosome	Ribosomal S13/S15 N-terminal domain	XM_002444890.2 PREDICTED: Sorghum bicolor 40S ribosomal protein S13 (LOC8066106), mRNA	40S ribosomal protein S13 [Aphanomyces astaci] >ETV65998.1 40S ribosomal protein S13 [Aphanomyces astaci]	[J] KOG0400 40S ribosomal protein S13	40S ribosomal protein S13 OS=Glycine max GN=RPS13 PE=2 SV=1	GO:0005840//ribosome;GO:0070181//small ribosomal subunit rRNA binding;GO:0005730//nucleolus;GO:0006412//translation;GO:0003735//structural constituent of ribosome;GO:0022627//cytosolic small ribosomal subunit
CL7332.Contig3_All	2106	ko03010//Ribosome	Genetic Information Processing	Translation	1.19343	2.75913e-74	2.79627e-75	K02940//large subunit ribosomal protein L9e+ko03010//Ribosome;K02940//large subunit ribosomal protein L9e+ko03010//Ribosome;K02940//large subunit ribosomal protein L9e+ko03010//Ribosome;K02940//large subunit ribosomal protein L9e+ko03010//Ribosome;K02940//large subunit ribosomal protein L9e+ko03010//Ribosome		XM_013043507.1 Blastocystis hominis mRNA	conserved unknown protein [Ectocarpus siliculosus]	[J] KOG3255 60S ribosomal protein L9	60S ribosomal protein L9-1 OS=Arabidopsis thaliana GN=RPL9B PE=1 SV=3
Unigene43040_All	768	ko03010//Ribosome	Genetic Information Processing	Translation	1.17612	9.89415e-07	5.13786e-07	K02919//large subunit ribosomal protein L36+ko03010//Ribosome			unnamed protein product [Albugo candida]	[J] KOG4122 Mitochondrial/chloroplast ribosomal protein L36	50S ribosomal protein L36, chloroplastic OS=Physcomitrella patens subsp. patens GN=rpl36 PE=3 SV=1	GO:0005840//ribosome;GO:0006412//translation;GO:0003735//structural constituent of ribosome
CL736.Contig4_All	1155	ko03010//Ribosome	Genetic Information Processing	Translation	1.1624	2.2286e-148	1.36754e-149	K02936//large subunit ribosomal protein L7Ae+ko03010//Ribosome;K02936//large subunit ribosomal protein L7Ae+ko03010//Ribosome;K02936//large subunit ribosomal protein L7Ae+ko03010//Ribosome;K02936//large subunit ribosomal protein L7Ae+ko03010//Ribosome;K02936//large subunit ribosomal protein L7Ae+ko03010//Ribosome	Ribosomal protein L7Ae/L30e/S12e/Gadd45 family	XM_009517294.1 Phytophthora sojae hypothetical protein partial mRNA	conserved unknown protein [Ectocarpus siliculosus]	[J] KOG3166 60S ribosomal protein L7A	60S ribosomal protein L7a-1 OS=Oryza sativa subsp. japonica GN=RPL7A-1 PE=2 SV=1
CL5219.Contig2_All	1340	ko03010//Ribosome	Genetic Information Processing	Translation	1.15948	2.9132e-50	3.89868e-51	K02987//small subunit ribosomal protein S4e+ko03010//Ribosome;K02987//small subunit ribosomal protein S4e+ko03010//Ribosome;K02987//small subunit ribosomal protein S4e+ko03010//Ribosome;K02987//small subunit ribosomal protein S4e+ko03010//Ribosome;K02987//small subunit ribosomal protein S4e+ko03010//Ribosome	Ribosomal family S4e	CP018158.1 Oryza sativa Indica Group cultivar Shuhui498 chromosome 2 sequence	40s ribosomal protein s4 [Nannochloropsis gaditana]	[J] KOG0378 40S ribosomal protein S4	40S ribosomal protein S4 OS=Prunus armeniaca GN=RPS4 PE=2 SV=1	GO:0005840//ribosome;GO:0006412//translation;GO:0003735//structural constituent of ribosome;GO:0019843//rRNA binding
CL5219.Contig1_All	1238	ko03010//Ribosome	Genetic Information Processing	Translation	1.15698	1.84232e-137	1.20016e-138	K02987//small subunit ribosomal protein S4e+ko03010//Ribosome;K02987//small subunit ribosomal protein S4e+ko03010//Ribosome;K02987//small subunit ribosomal protein S4e+ko03010//Ribosome;K02987//small subunit ribosomal protein S4e+ko03010//Ribosome;K02987//small subunit ribosomal protein S4e+ko03010//Ribosome	Ribosomal family S4e	CP018158.1 Oryza sativa Indica Group cultivar Shuhui498 chromosome 2 sequence	40s ribosomal protein s4 [Nannochloropsis gaditana]	[J] KOG0378 40S ribosomal protein S4	40S ribosomal protein S4 OS=Prunus armeniaca GN=RPS4 PE=2 SV=1	GO:0005840//ribosome;GO:0006412//translation;GO:0003735//structural constituent of ribosome;GO:0019843//rRNA binding
Unigene5551_All	2798	ko03010//Ribosome	Genetic Information Processing	Translation	1.15223	2.52455e-35	4.35901e-36	K02912//large subunit ribosomal protein L32e+ko03010//Ribosome;K02912//large subunit ribosomal protein L32e+ko03010//Ribosome;K02912//large subunit ribosomal protein L32e+ko03010//Ribosome;K02912//large subunit ribosomal protein L32e+ko03010//Ribosome;K02912//large subunit ribosomal protein L32e+ko03010//Ribosome	Ribosomal protein L32	XM_004488239.2 PREDICTED: Cicer arietinum 60S ribosomal protein L32-1 (LOC101513319), mRNA	conserved unknown protein [Ectocarpus siliculosus]	[J] KOG0878 60S ribosomal protein L32	60S ribosomal protein L32-2 OS=Arabidopsis thaliana GN=RPL32B PE=2 SV=1	GO:0005840//ribosome;GO:0006412//translation;GO:0022625//cytosolic large ribosomal subunit;GO:0003735//structural constituent of ribosome
Unigene26467_All	709	ko03010//Ribosome	Genetic Information Processing	Translation	1.14974	6.8501e-16	2.03696e-16	K02930//large subunit ribosomal protein L4e+ko03010//Ribosome;K02930//large subunit ribosomal protein L4e+ko03010//Ribosome;K02930//large subunit ribosomal protein L4e+ko03010//Ribosome;K02930//large subunit ribosomal protein L4e+ko03010//Ribosome		XM_009517770.1 Phytophthora sojae hypothetical protein mRNA	60S ribosomal protein L4-1 [Auxenochlorella protothecoides] >KFM27485.1 60S ribosomal protein L4-1 [Auxenochlorella protothecoides]	[A] KOG1475 Ribosomal protein RPL1/RPL2/RL4L4	60S ribosomal protein L4 OS=Prunus armeniaca GN=RPL4 PE=2 SV=1	GO:0005840//ribosome;GO:0006412//translation;GO:0003735//structural constituent of ribosome
CL5737.Contig1_All	1078	ko03010//Ribosome	Genetic Information Processing	Translation	1.14813	8.50832e-23	1.97236e-23	K02930//large subunit ribosomal protein L4e+ko03010//Ribosome;K02930//large subunit ribosomal protein L4e+ko03010//Ribosome;K02930//large subunit ribosomal protein L4e+ko03010//Ribosome	60S ribosomal protein L4 C-terminal domain	XM_009517770.1 Phytophthora sojae hypothetical protein mRNA	unknown [Zea mays]	[A] KOG1475 Ribosomal protein RPL1/RPL2/RL4L4	60S ribosomal protein L4-2 OS=Arabidopsis thaliana GN=RPL4D PE=1 SV=2	GO:0005840//ribosome;GO:0006412//translation;GO:0003735//structural constituent of ribosome
CL8668.Contig1_All	901	ko03010//Ribosome	Genetic Information Processing	Translation	1.14511	6.31579e-13	2.14343e-13	K02891//large subunit ribosomal protein L22e+ko03010//Ribosome;K02891//large subunit ribosomal protein L22e+ko03010//Ribosome;K02891//large subunit ribosomal protein L22e+ko03010//Ribosome;K02891//large subunit ribosomal protein L22e+ko03010//Ribosome;K02891//large subunit ribosomal protein L22e+ko03010//Ribosome			60S ribosomal protein L22 1 [Phytophthora nicotianae] >KUF99755.1 hypothetical protein AM588_10009405 [Phytophthora nicotianae]	[J] KOG3434 60S ribosomal protein L22	60S ribosomal protein L22-2 OS=Arabidopsis thaliana GN=RPL22B PE=2 SV=1	GO:0005840//ribosome;GO:0003723//RNA binding;GO:0002181//cytoplasmic translation;GO:0006412//translation;GO:0022625//cytosolic large ribosomal subunit;GO:0003735//structural constituent of ribosome
CL2408.Contig3_All	1446	ko03010//Ribosome	Genetic Information Processing	Translation	1.12763	1.43243e-21	3.44619e-22	K02962//small subunit ribosomal protein S17e+ko03010//Ribosome;K02962//small subunit ribosomal protein S17e+ko03010//Ribosome;K02962//small subunit ribosomal protein S17e+ko03010//Ribosome;K02962//small subunit ribosomal protein S17e+ko03010//Ribosome;K02962//small subunit ribosomal protein S17e+ko03010//Ribosome		XM_009374263.2 PREDICTED: Pyrus x bretschneideri 40S ribosomal protein S17-4-like (LOC103961687), mRNA	hypothetical protein AURANDRAFT_36910 [Aureococcus anophagefferens] >EGB09926.1 hypothetical protein AURANDRAFT_36910 [Aureococcus anophagefferens]	[J] KOG0187 40S ribosomal protein S17	40S ribosomal protein S17 OS=Solanum lycopersicum GN=RPS17 PE=2 SV=3	GO:0005840//ribosome;GO:0006412//translation;GO:0003735//structural constituent of ribosome
CL110.Contig3_All	407	ko03010//Ribosome	Genetic Information Processing	Translation	1.12735	6.14642e-15	1.89978e-15	K02883//large subunit ribosomal protein L18e+ko03010//Ribosome;K02883//large subunit ribosomal protein L18e+ko03010//Ribosome;K02883//large subunit ribosomal protein L18e+ko03010//Ribosome;K02883//large subunit ribosomal protein L18e+ko03010//Ribosome;K02883//large subunit ribosomal protein L18e+ko03010//Ribosome			60S ribosomal protein [Saprolegnia diclina VS20] >XP_012199763.1 60S ribosomal protein [Saprolegnia parasitica CBS 223.65] >EQC38911.1 60S ribosomal protein [Saprolegnia diclina VS20] >KDO29707.1 60S ribosomal protein [Saprolegnia parasitica CBS 223.65]		60S ribosomal protein L18 (Fragment) OS=Cicer arietinum GN=RPL18 PE=2 SV=1
[truncated: 266 more rows]

## Sheet: Endocytosis
Supplementary Table 7:	Differentially expressed genes involved in protein processing in endocytosis metabolism
[truncated: 261 more rows]
