# Supplementary material for: Ocean warming and acidification affect the transitional element and macromolecular accumulation in harmful raphidophyte Heterosigma akashiwo
Source: Research Square preprint supplement (doi:10.21203/rs.3.rs-2173912/v1), 2022-11-03
Supplement: Supplementary file 3 [file 6d345ae725fd81fcca77e395.xlsx]

## Sheet: RNA degradation
Supplementary Table 6:	Differentially expressed genes involved in RNA degradation metabolism
Gene ID	Length	Pathway Name	Level 1	Level 2	log2(He_1000/He_400)	Qvalue(He_400-vs-He_1000)	Pvalue(He_400-vs-He_1000)	Kegg Orthology	Pfam	Nt	Nr	Kog	Swissprot	GO
Unigene2583_All	668	ko03018//RNA degradation;ko03015//mRNA surveillance pathway;ko03013//RNA transport	Genetic Information Processing	Translation;Folding, sorting and degradation	5.77295	9.31713e-08	4.41528e-08	K13126//polyadenylate-binding protein+ko03015//mRNA surveillance pathway+ko03018//RNA degradation+ko03013//RNA transport;K13126//polyadenylate-binding protein+ko03015//mRNA surveillance pathway+ko03018//RNA degradation+ko03013//RNA transport;K13126//polyadenylate-binding protein+ko03015//mRNA surveillance pathway+ko03018//RNA degradation+ko03013//RNA transport;K13126//polyadenylate-binding protei…	RNA recognition motif. (a.k.a. RRM, RBD, or RNP domain)		hypothetical protein GUITHDRAFT_84932 [Guillardia theta CCMP2712] >EKX51914.1 hypothetical protein GUITHDRAFT_84932 [Guillardia theta CCMP2712]	[AJ] KOG0123 Polyadenylate-binding protein (RRM superfamily)	Polyadenylate-binding protein 2 OS=Arabidopsis thaliana GN=PAB2 PE=1 SV=1	GO:0003723//RNA binding;GO:0003729//mRNA binding;GO:0005634//nucleus;GO:0060211//regulation of nuclear-transcribed mRNA poly(A) tail shortening;GO:0000184//nuclear-transcribed mRNA catabolic process, nonsense-mediated decay;GO:0016032//viral process;GO:0005737//cytoplasm;GO:0006413//translational initiation;GO:0006446//regulation of translational initiation;GO:0003743//translation initiation fact…
CL1572.Contig5_All	2302	ko03018//RNA degradation	Genetic Information Processing	Folding, sorting and degradation	2.70499	6.75136e-278	2.47266e-279	K12603//CCR4-NOT transcription complex subunit 6 [EC:3.1.13.4]+ko03018//RNA degradation;K12603//CCR4-NOT transcription complex subunit 6 [EC:3.1.13.4]+ko03018//RNA degradation;K12603//CCR4-NOT transcription complex subunit 6 [EC:3.1.13.4]+ko03018//RNA degradation;K12603//CCR4-NOT transcription complex subunit 6 [EC:3.1.13.4]+ko03018//RNA degradation;K12603//CCR4-NOT transcription complex subunit …	Endonuclease/Exonuclease/phosphatase family		PREDICTED: carbon catabolite repressor protein 4 homolog 2-like [Nelumbo nucifera]	[K] KOG2338 Transcriptional effector CCR4-related protein	Carbon catabolite repressor protein 4 homolog 1 OS=Arabidopsis thaliana GN=CCR4-1 PE=2 SV=1	GO:0004535//poly(A)-specific ribonuclease activity
Unigene20300_All	1254	ko03018//RNA degradation	Genetic Information Processing	Folding, sorting and degradation	2.2093	9.60316e-121	6.8218e-122	K03679//exosome complex component RRP4+ko03018//RNA degradation;K03679//exosome complex component RRP4+ko03018//RNA degradation	Exosome complex exonuclease RRP4 N-terminal region		conserved unknown protein [Ectocarpus siliculosus]	[A] KOG3013 Exosomal 3'-5' exoribonuclease complex, subunit Rrp4	Exosome complex component RRP4 homolog OS=Arabidopsis thaliana GN=RRP4 PE=1 SV=1	GO:0003723//RNA binding;GO:0000178//exosome (RNase complex)
CL8087.Contig2_All	736	ko03018//RNA degradation;ko03040//Spliceosome	Genetic Information Processing	Folding, sorting and degradation;Transcription	1.56136	1.98847e-235	8.39051e-237	K12624//U6 snRNA-associated Sm-like protein LSm5+ko03040//Spliceosome+ko03018//RNA degradation;K12624//U6 snRNA-associated Sm-like protein LSm5+ko03040//Spliceosome+ko03018//RNA degradation;K12624//U6 snRNA-associated Sm-like protein LSm5+ko03040//Spliceosome+ko03018//RNA degradation;K12624//U6 snRNA-associated Sm-like protein LSm5+ko03040//Spliceosome+ko03018//RNA degradation;K12624//U6 snRNA-as…			hypothetical protein THRCLA_20104 [Thraustotheca clavata]	[A] KOG1775 U6 snRNA-associated Sm-like protein	Sm-like protein LSM5 OS=Arabidopsis thaliana GN=LSM5 PE=1 SV=1	GO:0030529//intracellular ribonucleoprotein complex
Unigene76590_All	1662	ko03018//RNA degradation;ko03008//Ribosome biogenesis in eukaryotes	Genetic Information Processing	Translation;Folding, sorting and degradation	1.414	7.3866e-70	7.80397e-71	K12618//5'-3' exoribonuclease 1 [EC:3.1.13.-]+ko03018//RNA degradation+ko03008//Ribosome biogenesis in eukaryotes;K12618//5'-3' exoribonuclease 1 [EC:3.1.13.-]+ko03018//RNA degradation+ko03008//Ribosome biogenesis in eukaryotes;K12618//5'-3' exoribonuclease 1 [EC:3.1.13.-]+ko03018//RNA degradation+ko03008//Ribosome biogenesis in eukaryotes;K12618//5'-3' exoribonuclease 1 [EC:3.1.13.-]+ko03018//RN…	XRN 5'-3' exonuclease N-terminus	XM_005855406.1 Nannochloropsis gaditana CCMP526 5 -3 exoribonuclease partial mRNA	dhm exonuclease [Ectocarpus siliculosus]	[LA] KOG2044 5'-3' exonuclease HKE1/RAT1	5'-3' exoribonuclease 3 OS=Arabidopsis thaliana GN=XRN3 PE=1 SV=1	GO:0004527//exonuclease activity;GO:0003676//nucleic acid binding
CL8897.Contig3_All	1960	ko01230//Biosynthesis of amino acids;ko01100//Metabolic pathways;ko01110//Biosynthesis of secondary metabolites;ko00010//Glycolysis / Gluconeogenesis;ko01200//Carbon metabolism;ko03018//RNA degradation	Genetic Information Processing;Metabolism	Global and overview maps;Carbohydrate metabolism;Folding, sorting and degradation	1.41219	0	0	K01689//enolase [EC:4.2.1.11]+ko00010//Glycolysis / Gluconeogenesis+ko01230//Biosynthesis of amino acids+ko03018//RNA degradation+ko01100//Metabolic pathways+ko01110//Biosynthesis of secondary metabolites+ko01200//Carbon metabolism;K01689//enolase [EC:4.2.1.11]+ko00010//Glycolysis / Gluconeogenesis+ko01230//Biosynthesis of amino acids+ko03018//RNA degradation+ko01100//Metabolic pathways+ko01110//…	Enolase, C-terminal TIM barrel domain	AY430417.1 Heterosigma akashiwo enolase gene, partial cds	enolase, partial [Heterosigma akashiwo]	[G] KOG2670 Enolase	Enolase OS=Solanum lycopersicum GN=PGH1 PE=2 SV=1
Unigene22028_All	1347	ko03018//RNA degradation;ko01110//Biosynthesis of secondary metabolites;ko01230//Biosynthesis of amino acids;ko01200//Carbon metabolism;ko01100//Metabolic pathways;ko00010//Glycolysis / Gluconeogenesis	Genetic Information Processing;Metabolism	Carbohydrate metabolism;Folding, sorting and degradation;Global and overview maps	1.33704	1.08626e-10	4.19251e-11	K01689//enolase [EC:4.2.1.11]+ko00010//Glycolysis / Gluconeogenesis+ko01230//Biosynthesis of amino acids+ko03018//RNA degradation+ko01100//Metabolic pathways+ko01110//Biosynthesis of secondary metabolites+ko01200//Carbon metabolism;K01689//enolase [EC:4.2.1.11]+ko00010//Glycolysis / Gluconeogenesis+ko01230//Biosynthesis of amino acids+ko03018//RNA degradation+ko01100//Metabolic pathways+ko01110//…	Enolase, C-terminal TIM barrel domain		Enolase (chromatophore) [Paulinella chromatophora] >ACB42803.1 Enolase (chromatophore) [Paulinella chromatophora]	[G] KOG2670 Enolase	Enolase OS=Ricinus communis PE=2 SV=1	GO:0000287//magnesium ion binding;GO:0004634//phosphopyruvate hydratase activity;GO:0006096//glycolytic process;GO:0000015//phosphopyruvate hydratase complex;GO:0009536//plastid
Unigene33847_All	1878	ko03013//RNA transport;ko03018//RNA degradation;ko03015//mRNA surveillance pathway;ko03040//Spliceosome	Genetic Information Processing	Folding, sorting and degradation;Translation;Transcription	1.28605	8.52245e-69	9.09657e-70	K12614//ATP-dependent RNA helicase DDX6/DHH1 [EC:3.6.4.13]+ko03018//RNA degradation;K14777//ATP-dependent RNA helicase DDX47/RRP3 [EC:3.6.4.13];K13025//ATP-dependent RNA helicase [EC:3.6.4.13]+ko03040//Spliceosome+ko03015//mRNA surveillance pathway+ko03013//RNA transport;K14777//ATP-dependent RNA helicase DDX47/RRP3 [EC:3.6.4.13];K13025//ATP-dependent RNA helicase [EC:3.6.4.13]+ko03040//Spliceoso…	DEAD/DEAH box helicase		DEAD box helicase [Ectocarpus siliculosus]	[J] KOG0327 Translation initiation factor 4F, helicase subunit (eIF-4A) and related helicases	DEAD-box ATP-dependent RNA helicase 58, chloroplastic OS=Arabidopsis thaliana GN=RH58 PE=2 SV=1	GO:0004004//ATP-dependent RNA helicase activity;GO:0005524//ATP binding;GO:0005730//nucleolus;GO:0010501//RNA secondary structure unwinding;GO:0006364//rRNA processing;GO:0005737//cytoplasm;GO:0003676//nucleic acid binding
CL10977.Contig4_All	2875	ko04016//MAPK signaling pathway - plant;ko03018//RNA degradation;ko03008//Ribosome biogenesis in eukaryotes	Environmental Information Processing;Genetic Information Processing	Signal transduction;Folding, sorting and degradation;Translation	1.27312	7.66654e-87	6.91245e-88	K12618//5'-3' exoribonuclease 1 [EC:3.1.13.-]+ko03018//RNA degradation+ko03008//Ribosome biogenesis in eukaryotes;K12618//5'-3' exoribonuclease 1 [EC:3.1.13.-]+ko03018//RNA degradation+ko03008//Ribosome biogenesis in eukaryotes;K20553//5'-3' exoribonuclease 4 [EC:3.1.13.-]+ko04016//MAPK signaling pathway - plant;K20553//5'-3' exoribonuclease 4 [EC:3.1.13.-]+ko04016//MAPK signaling pathway - plant	XRN 5'-3' exonuclease N-terminus	XM_005855406.1 Nannochloropsis gaditana CCMP526 5 -3 exoribonuclease partial mRNA	dhm exonuclease [Ectocarpus siliculosus]	[LD] KOG2045 5'-3' exonuclease XRN1/KEM1/SEP1 involved in DNA strand exchange and mRNA turnover	5'-3' exoribonuclease 3 OS=Arabidopsis thaliana GN=XRN3 PE=1 SV=1	GO:0004527//exonuclease activity;GO:0005634//nucleus;GO:0004534//5'-3' exoribonuclease activity;GO:0003676//nucleic acid binding
Unigene22678_All	804	ko03018//RNA degradation	Genetic Information Processing	Folding, sorting and degradation	1.19017	9.94215e-44	1.46371e-44	K03514//non-canonical poly(A) RNA polymerase PAPD5/7 [EC:2.7.7.19]+ko03018//RNA degradation	Anti-sigma-K factor rskA
CL8698.Contig1_All	1084	ko03018//RNA degradation	Genetic Information Processing	Folding, sorting and degradation	1.15634	1.78443e-33	3.20814e-34	K12592//exosome complex protein LRP1+ko03018//RNA degradation	Sas10/Utp3/C1D family		hypothetical protein GUITHDRAFT_67864 [Guillardia theta CCMP2712] >EKX49403.1 hypothetical protein GUITHDRAFT_67864 [Guillardia theta CCMP2712]	[L] KOG4835 DNA-binding protein C1D involved in regulation of double-strand break repair
CL5467.Contig1_All	1620	ko00010//Glycolysis / Gluconeogenesis;ko01100//Metabolic pathways;ko01200//Carbon metabolism;ko03018//RNA degradation;ko01110//Biosynthesis of secondary metabolites;ko01230//Biosynthesis of amino acids	Genetic Information Processing;Metabolism	Folding, sorting and degradation;Global and overview maps;Carbohydrate metabolism	1.13187	0	0	K01689//enolase [EC:4.2.1.11]+ko00010//Glycolysis / Gluconeogenesis+ko01230//Biosynthesis of amino acids+ko03018//RNA degradation+ko01100//Metabolic pathways+ko01110//Biosynthesis of secondary metabolites+ko01200//Carbon metabolism;K01689//enolase [EC:4.2.1.11]+ko00010//Glycolysis / Gluconeogenesis+ko01230//Biosynthesis of amino acids+ko03018//RNA degradation+ko01100//Metabolic pathways+ko01110//…	Enolase, C-terminal TIM barrel domain	XM_021449517.1 PREDICTED: Sorghum bicolor enolase 1 (LOC110431021), mRNA	enolase [Ectocarpus siliculosus]	[G] KOG2670 Enolase	Enolase OS=Mesembryanthemum crystallinum GN=PGH1 PE=2 SV=1
Unigene37953_All	2368	ko03018//RNA degradation	Genetic Information Processing	Folding, sorting and degradation	1.12105	0	0	K04077//chaperonin GroEL+ko03018//RNA degradation;K04077//chaperonin GroEL+ko03018//RNA degradation;K04077//chaperonin GroEL+ko03018//RNA degradation;K04077//chaperonin GroEL+ko03018//RNA degradation	TCP-1/cpn60 chaperonin family	XM_005781523.1 Emiliania huxleyi CCMP1516 heat shock protein 60 partial mRNA	hypothetical protein AURANDRAFT_72012 [Aureococcus anophagefferens] >EGB06320.1 hypothetical protein AURANDRAFT_72012 [Aureococcus anophagefferens]	[O] KOG0356 Mitochondrial chaperonin, Cpn60/Hsp60p	RuBisCO large subunit-binding protein subunit alpha, chloroplastic OS=Chlamydomonas reinhardtii PE=1 SV=1	GO:0006458//'de novo' protein folding;GO:0005524//ATP binding;GO:0005737//cytoplasm;GO:0007005//mitochondrion organization;GO:0061077//chaperone-mediated protein folding;GO:0005216//ion channel activity;GO:0005829//cytosol;GO:0051082//unfolded protein binding;GO:0016021//integral component of membrane;GO:0005739//mitochondrion;GO:0042026//protein refolding;GO:0044183//protein binding involved in …
Unigene76591_All	711	ko03008//Ribosome biogenesis in eukaryotes;ko03018//RNA degradation	Genetic Information Processing	Translation;Folding, sorting and degradation	1.10362	5.83638e-62	6.72725e-63	K12618//5'-3' exoribonuclease 1 [EC:3.1.13.-]+ko03018//RNA degradation+ko03008//Ribosome biogenesis in eukaryotes;K12618//5'-3' exoribonuclease 1 [EC:3.1.13.-]+ko03018//RNA degradation+ko03008//Ribosome biogenesis in eukaryotes;K12619//5'-3' exoribonuclease 2 [EC:3.1.13.-]+ko03018//RNA degradation+ko03008//Ribosome biogenesis in eukaryotes;K12619//5'-3' exoribonuclease 2 [EC:3.1.13.-]+ko03018//RN…	SnoaL-like polyketide cyclase		hypothetical protein BU14_0470s0014 [Porphyra umbilicalis]	[LD] KOG2045 5'-3' exonuclease XRN1/KEM1/SEP1 involved in DNA strand exchange and mRNA turnover	5'-3' exoribonuclease 3 OS=Arabidopsis thaliana GN=XRN3 PE=1 SV=1	GO:0004527//exonuclease activity;GO:0005634//nucleus;GO:0004534//5'-3' exoribonuclease activity;GO:0003676//nucleic acid binding
Unigene22341_All	834	ko03018//RNA degradation	Genetic Information Processing	Folding, sorting and degradation	1.02973	2.05842e-07	1.00564e-07	K12606//CCR4-NOT transcription complex subunit 9+ko03018//RNA degradation	Lamprin
CL5930.Contig1_All	2783	ko03018//RNA degradation	Genetic Information Processing	Folding, sorting and degradation	-1.04787	1.46665e-05	8.64461e-06	K14442//ATP-dependent RNA helicase DHX36 [EC:3.6.4.13]+ko03018//RNA degradation;K14442//ATP-dependent RNA helicase DHX36 [EC:3.6.4.13]+ko03018//RNA degradation;K14442//ATP-dependent RNA helicase DHX36 [EC:3.6.4.13]+ko03018//RNA degradation;K14442//ATP-dependent RNA helicase DHX36 [EC:3.6.4.13]+ko03018//RNA degradation;K14442//ATP-dependent RNA helicase DHX36 [EC:3.6.4.13]+ko03018//RNA degradation	Helicase associated domain (HA2)		DExH-box ATP-dependent RNA helicase DExH1 isoform X2 [Sesamum indicum]	[A] KOG0920 ATP-dependent RNA helicase A	DExH-box ATP-dependent RNA helicase DExH1 OS=Arabidopsis thaliana GN=At2g35920 PE=2 SV=1
CL10808.Contig2_All	4651	ko03018//RNA degradation	Genetic Information Processing	Folding, sorting and degradation	-1.05025	3.245e-180	1.69493e-181	K12598//ATP-dependent RNA helicase DOB1 [EC:3.6.4.13]+ko03018//RNA degradation	Reverse transcriptase (RNA-dependent DNA polymerase)	CU406099.1 Oryza rufipogon (W1943) cDNA clone: ORW1943S102H07, full insert sequence	PREDICTED: RNA-directed DNA polymerase from mobile element jockey-like [Glycine max]	[R] KOG1075 FOG: Reverse transcriptase		GO:0003964//RNA-directed DNA polymerase activity
Unigene990_All	1397	ko03018//RNA degradation	Genetic Information Processing	Folding, sorting and degradation	-1.05907	1.4555e-20	3.62435e-21	K14442//ATP-dependent RNA helicase DHX36 [EC:3.6.4.13]+ko03018//RNA degradation;K14442//ATP-dependent RNA helicase DHX36 [EC:3.6.4.13]+ko03018//RNA degradation;K14442//ATP-dependent RNA helicase DHX36 [EC:3.6.4.13]+ko03018//RNA degradation;K14442//ATP-dependent RNA helicase DHX36 [EC:3.6.4.13]+ko03018//RNA degradation;K14442//ATP-dependent RNA helicase DHX36 [EC:3.6.4.13]+ko03018//RNA degradation	Helicase conserved C-terminal domain		conserved unknown protein [Ectocarpus siliculosus]	[A] KOG0920 ATP-dependent RNA helicase A	DExH-box ATP-dependent RNA helicase DExH3 OS=Arabidopsis thaliana GN=At1g48650 PE=3 SV=1	GO:0005524//ATP binding;GO:0004386//helicase activity;GO:0003676//nucleic acid binding
CL10687.Contig1_All	2243	ko00062//Fatty acid elongation;ko01212//Fatty acid metabolism;ko03018//RNA degradation;ko01100//Metabolic pathways	Genetic Information Processing;Metabolism	Global and overview maps;Lipid metabolism;Folding, sorting and degradation	-1.06856	1.1262e-05	6.55507e-06	K07512//mitochondrial trans-2-enoyl-CoA reductase [EC:1.3.1.38]+ko01100//Metabolic pathways+ko00062//Fatty acid elongation+ko01212//Fatty acid metabolism;K07512//mitochondrial trans-2-enoyl-CoA reductase [EC:1.3.1.38]+ko01100//Metabolic pathways+ko00062//Fatty acid elongation+ko01212//Fatty acid metabolism;K07512//mitochondrial trans-2-enoyl-CoA reductase [EC:1.3.1.38]+ko01100//Metabolic pathways…	Zinc-binding dehydrogenase		hypothetical protein SELMODRAFT_405152 [Selaginella moellendorffii] >EFJ35217.1 hypothetical protein SELMODRAFT_405152 [Selaginella moellendorffii]	[KC] KOG0025 Zn2+-binding dehydrogenase (nuclear receptor binding factor-1)	Probable mannitol dehydrogenase 1 OS=Stylosanthes humilis GN=CAD1 PE=2 SV=1	GO:0016491//oxidoreductase activity
Unigene18163_All	1496	ko03013//RNA transport;ko03018//RNA degradation;ko03015//mRNA surveillance pathway	Genetic Information Processing	Translation;Folding, sorting and degradation	-1.06899	5.67849e-82	5.32666e-83	K13126//polyadenylate-binding protein+ko03015//mRNA surveillance pathway+ko03018//RNA degradation+ko03013//RNA transport;K13161//heterogeneous nuclear ribonucleoprotein R;K13161//heterogeneous nuclear ribonucleoprotein R;K13126//polyadenylate-binding protein+ko03015//mRNA surveillance pathway+ko03018//RNA degradation+ko03013//RNA transport;K13126//polyadenylate-binding protein+ko03015//mRNA surve…	RNA recognition motif. (a.k.a. RRM, RBD, or RNP domain)		tia1 cytotoxic granule-associated rna binding protein [Nannochloropsis gaditana]	[A] KOG0145 RNA-binding protein ELAV/HU (RRM superfamily)	Polyadenylate-binding protein RBP45C OS=Arabidopsis thaliana GN=RBP45C PE=2 SV=1	GO:0003723//RNA binding;GO:0016021//integral component of membrane
Unigene29337_All	3851	ko03015//mRNA surveillance pathway;ko03018//RNA degradation;ko03013//RNA transport	Genetic Information Processing	Translation;Folding, sorting and degradation	-1.06995	0	0	K22020//mucin-19;K14325//RNA-binding protein with serine-rich domain 1+ko03015//mRNA surveillance pathway+ko03013//RNA transport;K03514//non-canonical poly(A) RNA polymerase PAPD5/7 [EC:2.7.7.19]+ko03018//RNA degradation;K14325//RNA-binding protein with serine-rich domain 1+ko03015//mRNA surveillance pathway+ko03013//RNA transport;K14325//RNA-binding protein with serine-rich domain 1+ko03015//mRN…	ATP:guanido phosphotransferase, C-terminal catalytic domain	CT837280.1 Oryza sativa (indica cultivar-group) cDNA clone:OSIGCRA112N04, full insert sequence	hypothetical protein EMIHUDRAFT_452258 [Emiliania huxleyi CCMP1516] >EOD12102.1 hypothetical protein EMIHUDRAFT_452258 [Emiliania huxleyi CCMP1516]	[C] KOG3581 Creatine kinases		GO:0005524//ATP binding;GO:0016301//kinase activity
Unigene30055_All	1520	ko03018//RNA degradation	Genetic Information Processing	Folding, sorting and degradation	-1.08264	3.55877e-23	8.16245e-24	K12591//exosome complex exonuclease RRP6 [EC:3.1.13.-]+ko03018//RNA degradation;K12591//exosome complex exonuclease RRP6 [EC:3.1.13.-]+ko03018//RNA degradation;K12591//exosome complex exonuclease RRP6 [EC:3.1.13.-]+ko03018//RNA degradation	3'-5' exonuclease		exosome complex exonuclease RRP6 [Monoraphidium neglectum] >KIZ00853.1 exosome complex exonuclease RRP6 [Monoraphidium neglectum]	[J] KOG2206 Exosome 3'-5' exoribonuclease complex, subunit PM/SCL-100 (Rrp6)	CASP-like protein 4A2 OS=Zea mays PE=2 SV=1	GO:0008408//3'-5' exonuclease activity;GO:0000166//nucleotide binding;GO:0016021//integral component of membrane;GO:0005622//intracellular;GO:0003676//nucleic acid binding
Unigene11060_All	6490	ko03018//RNA degradation	Genetic Information Processing	Folding, sorting and degradation	-1.08381	2.10496e-174	1.12994e-175	K19612//2',5'-phosphodiesterase [EC:3.1.13.4 3.1.4.-];K12603//CCR4-NOT transcription complex subunit 6 [EC:3.1.13.4]+ko03018//RNA degradation	Endonuclease/Exonuclease/phosphatase family	XM_016792136.1 PREDICTED: Prunus mume ethylene-overproduction protein 1 (LOC103342149), mRNA	hypothetical protein PHYSODRAFT_560754 [Phytophthora sojae] >EGZ16262.1 hypothetical protein PHYSODRAFT_560754 [Phytophthora sojae]	[K] KOG0620 Glucose-repressible alcohol dehydrogenase transcriptional effector CCR4 and related proteins	Binding partner of ACD11 1 OS=Arabidopsis thaliana GN=BPA1 PE=1 SV=1
CL27.Contig1_All	1199	ko03018//RNA degradation	Genetic Information Processing	Folding, sorting and degradation	-1.08881	1.10841e-11	4.02318e-12	K22020//mucin-19;K01411//nardilysin [EC:3.4.24.61];K03514//non-canonical poly(A) RNA polymerase PAPD5/7 [EC:2.7.7.19]+ko03018//RNA degradation	Zinc carboxypeptidase	XM_005788328.1 Emiliania huxleyi CCMP1516 hypothetical protein partial mRNA	Zinc carboxypeptidase-like protein [Klebsormidium nitens]	[E] KOG3641 Zinc carboxypeptidase	Nucleosome assembly protein 1;2 OS=Nicotiana tabacum GN=NAP1;2 PE=1 SV=1	GO:0031514//motile cilium;GO:0008270//zinc ion binding;GO:0004181//metallocarboxypeptidase activity
Unigene42502_All	1064	ko03018//RNA degradation	Genetic Information Processing	Folding, sorting and degradation	-1.09162	3.04197e-05	1.86383e-05	K20101//ATP-dependent RNA helicase DHX34 [EC:3.6.4.13];K14442//ATP-dependent RNA helicase DHX36 [EC:3.6.4.13]+ko03018//RNA degradation;K14442//ATP-dependent RNA helicase DHX36 [EC:3.6.4.13]+ko03018//RNA degradation	DEAD/DEAH box helicase	XM_005758534.1 Emiliania huxleyi CCMP1516 hypothetical protein partial mRNA	hypothetical protein GUITHDRAFT_166262 [Guillardia theta CCMP2712] >EKX34227.1 hypothetical protein GUITHDRAFT_166262 [Guillardia theta CCMP2712]	[A] KOG0922 DEAH-box RNA helicase	DExH-box ATP-dependent RNA helicase DExH3 OS=Arabidopsis thaliana GN=At1g48650 PE=3 SV=1	GO:0005524//ATP binding;GO:0016021//integral component of membrane;GO:0004386//helicase activity
Unigene38461_All	2027	ko03018//RNA degradation	Genetic Information Processing	Folding, sorting and degradation	-1.10198	8.40264e-08	3.96738e-08	K12599//antiviral helicase SKI2 [EC:3.6.4.-]+ko03018//RNA degradation;K12599//antiviral helicase SKI2 [EC:3.6.4.-]+ko03018//RNA degradation;K12599//antiviral helicase SKI2 [EC:3.6.4.-]+ko03018//RNA degradation;K12599//antiviral helicase SKI2 [EC:3.6.4.-]+ko03018//RNA degradation			DEAD box helicase [Ectocarpus siliculosus]	[A] KOG0947 Cytoplasmic exosomal RNA helicase SKI2, DEAD-box superfamily	DExH-box ATP-dependent RNA helicase DExH11 OS=Arabidopsis thaliana GN=SKI2 PE=1 SV=1	GO:0006401//RNA catabolic process;GO:0003723//RNA binding;GO:0005524//ATP binding;GO:0003724//RNA helicase activity
CL7974.Contig3_All	2112	ko03018//RNA degradation	Genetic Information Processing	Folding, sorting and degradation	-1.10566	3.31253e-08	1.51314e-08	K12603//CCR4-NOT transcription complex subunit 6 [EC:3.1.13.4]+ko03018//RNA degradation	Endonuclease/Exonuclease/phosphatase family		predicted protein [Ostreococcus lucimarinus CCE9901] >ABO97626.1 predicted protein [Ostreococcus lucimarinus CCE9901]
CL11114.Contig1_All	2828	ko03018//RNA degradation	Genetic Information Processing	Folding, sorting and degradation	-1.14294	3.1648e-15	9.67762e-16	K12599//antiviral helicase SKI2 [EC:3.6.4.-]+ko03018//RNA degradation;K12599//antiviral helicase SKI2 [EC:3.6.4.-]+ko03018//RNA degradation	DSHCT (NUC185) domain		DEAD box helicase [Ectocarpus siliculosus]	[A] KOG0947 Cytoplasmic exosomal RNA helicase SKI2, DEAD-box superfamily	DExH-box ATP-dependent RNA helicase DExH9 OS=Arabidopsis thaliana GN=MTR4 PE=2 SV=1
Unigene22916_All	480	ko03018//RNA degradation	Genetic Information Processing	Folding, sorting and degradation	-1.16743	1.6595e-10	6.47605e-11	K12607//CCR4-NOT transcription complex subunit 10+ko03018//RNA degradation;K12607//CCR4-NOT transcription complex subunit 10+ko03018//RNA degradation;K12607//CCR4-NOT transcription complex subunit 10+ko03018//RNA degradation;K12607//CCR4-NOT transcription complex subunit 10+ko03018//RNA degradation;K12607//CCR4-NOT transcription complex subunit 10+ko03018//RNA degradation	Tetratricopeptide repeat		hypothetical protein, variant 3 [Phytophthora parasitica P10297]
Unigene22465_All	1622	ko03018//RNA degradation	Genetic Information Processing	Folding, sorting and degradation	-1.16905	3.49927e-35	6.07017e-36	K12584//m7GpppX diphosphatase [EC:3.6.1.59]+ko03018//RNA degradation	Scavenger mRNA decapping enzyme C-term binding		HIT-like protein [Fragilariopsis cylindrus CCMP1102]	[S] KOG3969 Uncharacterized conserved protein		GO:0016787//hydrolase activity;GO:0000290//deadenylation-dependent decapping of nuclear-transcribed mRNA
CL8527.Contig5_All	3181	ko03018//RNA degradation;ko03015//mRNA surveillance pathway;ko03013//RNA transport	Genetic Information Processing	Folding, sorting and degradation;Translation	-1.17688	0	0	K22020//mucin-19;K03514//non-canonical poly(A) RNA polymerase PAPD5/7 [EC:2.7.7.19]+ko03018//RNA degradation;K14325//RNA-binding protein with serine-rich domain 1+ko03015//mRNA surveillance pathway+ko03013//RNA transport;K14325//RNA-binding protein with serine-rich domain 1+ko03015//mRNA surveillance pathway+ko03013//RNA transport;K14325//RNA-binding protein with serine-rich domain 1+ko03015//mRN…	ATP:guanido phosphotransferase, C-terminal catalytic domain	CT837280.1 Oryza sativa (indica cultivar-group) cDNA clone:OSIGCRA112N04, full insert sequence	hypothetical protein EMIHUDRAFT_452258 [Emiliania huxleyi CCMP1516] >EOD12102.1 hypothetical protein EMIHUDRAFT_452258 [Emiliania huxleyi CCMP1516]	[C] KOG3581 Creatine kinases		GO:0005524//ATP binding;GO:0016301//kinase activity
Unigene22333_All	906	ko03018//RNA degradation	Genetic Information Processing	Folding, sorting and degradation	-1.19137	7.37234e-11	2.81634e-11	K12600//superkiller protein 3+ko03018//RNA degradation;K12600//superkiller protein 3+ko03018//RNA degradation;K22020//mucin-19;K12600//superkiller protein 3+ko03018//RNA degradation;K12600//superkiller protein 3+ko03018//RNA degradation	Tetratricopeptide repeat		uncharacterized protein LOC110926720, partial [Helianthus annuus]	[A] KOG1127 TPR repeat-containing protein
Unigene26049_All	1565	ko03018//RNA degradation;ko04075//Plant hormone signal transduction;ko03015//mRNA surveillance pathway	Environmental Information Processing;Genetic Information Processing	Translation;Signal transduction;Folding, sorting and degradation	-1.19424	1.96236e-22	4.59838e-23	K11665//DNA helicase INO80 [EC:3.6.4.12];K15168//mediator of RNA polymerase II transcription subunit 25;K14486//auxin response factor+ko04075//Plant hormone signal transduction;K15542//polyadenylation factor subunit 2+ko03015//mRNA surveillance pathway;K12614//ATP-dependent RNA helicase DDX6/DHH1 [EC:3.6.4.13]+ko03018//RNA degradation	Potassium channel Kv1.4 tandem inactivation domain		LEUNIG family protein [Populus trichocarpa] >ERP49525.1 LEUNIG family protein [Populus trichocarpa]	[U] KOG1787 Kinase A-anchor protein Neurobeachin and related BEACH and WD40 repeat proteins	Transcriptional corepressor LEUNIG OS=Arabidopsis thaliana GN=LUG PE=1 SV=2
Unigene18097_All	1481	ko03018//RNA degradation	Genetic Information Processing	Folding, sorting and degradation	-1.25153	1.8281e-18	4.90442e-19	K12580//CCR4-NOT transcription complex subunit 3+ko03018//RNA degradation;K12580//CCR4-NOT transcription complex subunit 3+ko03018//RNA degradation;K12580//CCR4-NOT transcription complex subunit 3+ko03018//RNA degradation;K12580//CCR4-NOT transcription complex subunit 3+ko03018//RNA degradation;K12580//CCR4-NOT transcription complex subunit 3+ko03018//RNA degradation	NOT2 / NOT3 / NOT5 family	XM_014048519.1 Monoraphidium neglectum CCR4-NOT transcription complex subunit 3 mRNA	hypothetical protein EMIHUDRAFT_427005 [Emiliania huxleyi CCMP1516] >EOD26433.1 hypothetical protein EMIHUDRAFT_427005 [Emiliania huxleyi CCMP1516]	[K] KOG2150 CCR4-NOT transcriptional regulation complex, NOT5 subunit	Formin-like protein 14 OS=Arabidopsis thaliana GN=FH14 PE=3 SV=3	GO:0005634//nucleus;GO:0006355//regulation of transcription, DNA-templated;GO:0030015//CCR4-NOT core complex
Unigene16961_All	1061	ko03018//RNA degradation	Genetic Information Processing	Folding, sorting and degradation	-1.28491	1.32988e-05	7.79354e-06	K04043//molecular chaperone DnaK+ko03018//RNA degradation;K04043//molecular chaperone DnaK+ko03018//RNA degradation;K04043//molecular chaperone DnaK+ko03018//RNA degradation;K04043//molecular chaperone DnaK+ko03018//RNA degradation	Hsp70 protein		cognate HSP70, partial [Koliella antarctica]	[O] KOG0102 Molecular chaperones mortalin/PBP74/GRP75, HSP70 superfamily	Chaperone protein dnaK OS=Cyanidioschyzon merolae (strain 10D) GN=dnaK PE=3 SV=1	GO:0006457//protein folding;GO:0005524//ATP binding;GO:0051082//unfolded protein binding
CL8358.Contig1_All	2399	ko03018//RNA degradation	Genetic Information Processing	Folding, sorting and degradation	-1.32949	4.31375e-162	2.45704e-163	K04043//molecular chaperone DnaK+ko03018//RNA degradation;K04043//molecular chaperone DnaK+ko03018//RNA degradation;K04043//molecular chaperone DnaK+ko03018//RNA degradation;K04043//molecular chaperone DnaK+ko03018//RNA degradation;K04043//molecular chaperone DnaK+ko03018//RNA degradation	Hsp70 protein	XM_001694416.1 Chlamydomonas reinhardtii heat shock protein 70C (HSP70C), mRNA	chaperone, heat shock protein 70 [Thalassiosira pseudonana CCMP1335] >ACI64526.1 chaperone, heat shock protein 70 [Thalassiosira pseudonana CCMP1335]	[O] KOG0102 Molecular chaperones mortalin/PBP74/GRP75, HSP70 superfamily	Heat shock 70 kDa protein, mitochondrial OS=Phaseolus vulgaris PE=2 SV=1	GO:0006457//protein folding;GO:0005524//ATP binding;GO:0051082//unfolded protein binding
CL8123.Contig1_All	1447	ko03018//RNA degradation	Genetic Information Processing	Folding, sorting and degradation	-1.39655	2.38993e-15	7.26968e-16	K03654//ATP-dependent DNA helicase RecQ [EC:3.6.4.12]+ko03018//RNA degradation;K03654//ATP-dependent DNA helicase RecQ [EC:3.6.4.12]+ko03018//RNA degradation;K03654//ATP-dependent DNA helicase RecQ [EC:3.6.4.12]+ko03018//RNA degradation	HRDC domain		hypothetical protein SELMODRAFT_408296 [Selaginella moellendorffii] >EFJ31593.1 hypothetical protein SELMODRAFT_408296 [Selaginella moellendorffii]	[L] KOG0351 ATP-dependent DNA helicase		GO:0006281//DNA repair;GO:0005524//ATP binding;GO:0006260//DNA replication;GO:0043140//ATP-dependent 3'-5' DNA helicase activity;GO:0005622//intracellular;GO:0006310//DNA recombination;GO:0003676//nucleic acid binding
Unigene46386_All	725	ko03018//RNA degradation	Genetic Information Processing	Folding, sorting and degradation	-1.41907	0.000253031	0.00017598	K14442//ATP-dependent RNA helicase DHX36 [EC:3.6.4.13]+ko03018//RNA degradation;K14442//ATP-dependent RNA helicase DHX36 [EC:3.6.4.13]+ko03018//RNA degradation;K14442//ATP-dependent RNA helicase DHX36 [EC:3.6.4.13]+ko03018//RNA degradation;K14442//ATP-dependent RNA helicase DHX36 [EC:3.6.4.13]+ko03018//RNA degradation;K14442//ATP-dependent RNA helicase DHX36 [EC:3.6.4.13]+ko03018//RNA degradation	Helicase conserved C-terminal domain		conserved unknown protein (Partial), partial [Ectocarpus siliculosus]	[A] KOG0923 mRNA splicing factor ATP-dependent RNA helicase	Probable pre-mRNA-splicing factor ATP-dependent RNA helicase DEAH8 OS=Arabidopsis thaliana GN=At4g16680 PE=2 SV=2	GO:0005524//ATP binding;GO:0003676//nucleic acid binding
Unigene25640_All	2711	ko03018//RNA degradation	Genetic Information Processing	Folding, sorting and degradation	-1.45492	1.1919e-48	1.63273e-49	K12606//CCR4-NOT transcription complex subunit 9+ko03018//RNA degradation;K02184//formin 2;K19984//exocyst complex component 5;K02184//formin 2	Ankyrin repeats (3 copies)		hypothetical protein BU14_0357s0005 [Porphyra umbilicalis]	[W] KOG3544 Collagens (type IV and type XIII), and related proteins	Formin-like protein 5 OS=Oryza sativa subsp. japonica GN=FH5 PE=2 SV=2
Unigene45660_All	1806	ko01110//Biosynthesis of secondary metabolites;ko01200//Carbon metabolism;ko03018//RNA degradation;ko01100//Metabolic pathways;ko00010//Glycolysis / Gluconeogenesis;ko01230//Biosynthesis of amino acids	Genetic Information Processing;Metabolism	Global and overview maps;Folding, sorting and degradation;Carbohydrate metabolism	-1.49109	2.44959e-295	8.57247e-297	K01689//enolase [EC:4.2.1.11]+ko00010//Glycolysis / Gluconeogenesis+ko01230//Biosynthesis of amino acids+ko03018//RNA degradation+ko01100//Metabolic pathways+ko01110//Biosynthesis of secondary metabolites+ko01200//Carbon metabolism;K01689//enolase [EC:4.2.1.11]+ko00010//Glycolysis / Gluconeogenesis+ko01230//Biosynthesis of amino acids+ko03018//RNA degradation+ko01100//Metabolic pathways+ko01110//…	Enolase, C-terminal TIM barrel domain	AK354060.1 Hordeum vulgare subsp. vulgare mRNA for predicted protein, complete cds, clone: NIASHv1004L14	enolase [Nannochloropsis gaditana]	[G] KOG2670 Enolase	Enolase OS=Solanum lycopersicum GN=PGH1 PE=2 SV=1
CL8527.Contig3_All	1816	ko03015//mRNA surveillance pathway;ko03013//RNA transport;ko03018//RNA degradation	Genetic Information Processing	Translation;Folding, sorting and degradation	-1.49873	4.45885e-143	2.82307e-144	K22020//mucin-19;K02184//formin 2;K03514//non-canonical poly(A) RNA polymerase PAPD5/7 [EC:2.7.7.19]+ko03018//RNA degradation;K11593//eukaryotic translation initiation factor 2C;K14325//RNA-binding protein with serine-rich domain 1+ko03015//mRNA surveillance pathway+ko03013//RNA transport	ATP:guanido phosphotransferase, C-terminal catalytic domain		hypothetical protein EMIHUDRAFT_77619, partial [Emiliania huxleyi CCMP1516] >EOD40815.1 hypothetical protein EMIHUDRAFT_77619, partial [Emiliania huxleyi CCMP1516]	[C] KOG3581 Creatine kinases		GO:0005524//ATP binding;GO:0016301//kinase activity
Unigene33411_All	2689	ko03018//RNA degradation	Genetic Information Processing	Folding, sorting and degradation	-1.53204	7.65043e-48	1.06154e-48	K00962//polyribonucleotide nucleotidyltransferase [EC:2.7.7.8]+ko03018//RNA degradation;K00962//polyribonucleotide nucleotidyltransferase [EC:2.7.7.8]+ko03018//RNA degradation;K00962//polyribonucleotide nucleotidyltransferase [EC:2.7.7.8]+ko03018//RNA degradation;K00962//polyribonucleotide nucleotidyltransferase [EC:2.7.7.8]+ko03018//RNA degradation;K00962//polyribonucleotide nucleotidyltransfera…	3' exoribonuclease family, domain 1		polyribonucleotide nucleotidyltransferase 1, chloroplastic-like [Dorcoceras hygrometricum]	[R] KOG1067 Predicted RNA-binding polyribonucleotide nucleotidyltransferase	30S ribosomal protein S15, chloroplastic OS=Mesostigma viride GN=rps15 PE=3 SV=1
CL2869.Contig1_All	2173	ko00010//Glycolysis / Gluconeogenesis;ko01230//Biosynthesis of amino acids;ko01110//Biosynthesis of secondary metabolites;ko00051//Fructose and mannose metabolism;ko01100//Metabolic pathways;ko03018//RNA degradation;ko01200//Carbon metabolism;ko00052//Galactose metabolism;ko00030//Pentose phosphate pathway	Metabolism;Genetic Information Processing	Global and overview maps;Carbohydrate metabolism;Folding, sorting and degradation	-1.55464	1.84214e-203	8.69188e-205	K00850//6-phosphofructokinase 1 [EC:2.7.1.11]+ko00010//Glycolysis / Gluconeogenesis+ko00030//Pentose phosphate pathway+ko01230//Biosynthesis of amino acids+ko03018//RNA degradation+ko01100//Metabolic pathways+ko00052//Galactose metabolism+ko00051//Fructose and mannose metabolism+ko01110//Biosynthesis of secondary metabolites+ko01200//Carbon metabolism;K00850//6-phosphofructokinase 1 [EC:2.7.1.11]…	Phosphofructokinase		pyrophosphate-dependent phosphofructose kinase [Nannochloropsis gaditana]	[G] KOG2440 Pyrophosphate-dependent phosphofructo-1-kinase	ATP-dependent 6-phosphofructokinase 5, chloroplastic OS=Arabidopsis thaliana GN=PFK5 PE=1 SV=1	GO:0003872//6-phosphofructokinase activity;GO:0006002//fructose 6-phosphate metabolic process;GO:0005524//ATP binding;GO:0016021//integral component of membrane
Unigene25388_All	454	ko03018//RNA degradation;ko03013//RNA transport;ko03015//mRNA surveillance pathway;ko04141//Protein processing in endoplasmic reticulum	Genetic Information Processing	Translation;Folding, sorting and degradation	-1.57873	0.000619357	0.000459984	K02184//formin 2;K06269//serine/threonine-protein phosphatase PP1 catalytic subunit [EC:3.1.3.16]+ko03015//mRNA surveillance pathway;K14007//protein transport protein SEC24+ko04141//Protein processing in endoplasmic reticulum;K02184//formin 2;K13126//polyadenylate-binding protein+ko03015//mRNA surveillance pathway+ko03018//RNA degradation+ko03013//RNA transport	Armadillo/beta-catenin-like repeat		Armadillo-like helical [Nannochloropsis gaditana]	[U] KOG0166 Karyopherin (importin) alpha	Importin subunit alpha-1 OS=Arabidopsis thaliana GN=IMPA1 PE=1 SV=2
Unigene21818_All	2730	ko03018//RNA degradation	Genetic Information Processing	Folding, sorting and degradation	-1.6318	8.25892e-20	2.10856e-20	K03654//ATP-dependent DNA helicase RecQ [EC:3.6.4.12]+ko03018//RNA degradation;K03654//ATP-dependent DNA helicase RecQ [EC:3.6.4.12]+ko03018//RNA degradation;K03654//ATP-dependent DNA helicase RecQ [EC:3.6.4.12]+ko03018//RNA degradation;K03654//ATP-dependent DNA helicase RecQ [EC:3.6.4.12]+ko03018//RNA degradation;K03654//ATP-dependent DNA helicase RecQ [EC:3.6.4.12]+ko03018//RNA degradation	RQC domain		PREDICTED: uncharacterized protein LOC103946432 [Pyrus x bretschneideri] >XP_009379064.1 PREDICTED: uncharacterized protein LOC103967545 [Pyrus x bretschneideri]	[L] KOG0351 ATP-dependent DNA helicase	ATP-dependent DNA helicase Q-like 3 OS=Arabidopsis thaliana GN=RECQL3 PE=1 SV=1
Unigene20132_All	338	ko03018//RNA degradation	Genetic Information Processing	Folding, sorting and degradation	-1.68976	1.52045e-06	8.03581e-07	K12604//CCR4-NOT transcription complex subunit 1+ko03018//RNA degradation;K12604//CCR4-NOT transcription complex subunit 1+ko03018//RNA degradation;K12604//CCR4-NOT transcription complex subunit 1+ko03018//RNA degradation	CCR4-NOT transcription complex subunit 1 TTP binding domain	XM_003057741.1 Micromonas pusilla CCMP1545 predicted protein, mRNA	PREDICTED: CCR4-NOT transcription complex subunit 1-like isoform X1 [Solanum tuberosum] >XP_015167249.1 PREDICTED: CCR4-NOT transcription complex subunit 1-like isoform X1 [Solanum tuberosum]	[K] KOG1831 Negative regulator of transcription
CL3592.Contig2_All	1099	ko03018//RNA degradation	Genetic Information Processing	Folding, sorting and degradation	-1.7533	6.3933e-28	1.29948e-28	K12606//CCR4-NOT transcription complex subunit 9+ko03018//RNA degradation			hypothetical protein Naga_100100g22 [Nannochloropsis gaditana]	[W] KOG3544 Collagens (type IV and type XIII), and related proteins	Formin-like protein 18 OS=Oryza sativa subsp. japonica GN=FH18 PE=2 SV=1	GO:0015116//sulfate transmembrane transporter activity;GO:0016021//integral component of membrane
CL9681.Contig2_All	2425	ko03018//RNA degradation	Genetic Information Processing	Folding, sorting and degradation	-1.77264	1.02297e-25	2.18994e-26	K04077//chaperonin GroEL+ko03018//RNA degradation;K04077//chaperonin GroEL+ko03018//RNA degradation;K04077//chaperonin GroEL+ko03018//RNA degradation;K04077//chaperonin GroEL+ko03018//RNA degradation	TCP-1/cpn60 chaperonin family	FN822777.1 Chlamydomonas reinhardtii mRNA for mitochondrial chaperonin 60 precursor (cpn60C gene)	conserved unknown protein [Ectocarpus siliculosus]	[O] KOG0356 Mitochondrial chaperonin, Cpn60/Hsp60p	Chaperonin CPN60, mitochondrial OS=Arabidopsis thaliana GN=CPN60 PE=1 SV=2
CL8527.Contig6_All	2080	ko03013//RNA transport;ko03015//mRNA surveillance pathway;ko03018//RNA degradation	Genetic Information Processing	Translation;Folding, sorting and degradation	-1.82618	5.87665e-176	3.1274e-177	K22020//mucin-19;K14325//RNA-binding protein with serine-rich domain 1+ko03015//mRNA surveillance pathway+ko03013//RNA transport;K11593//eukaryotic translation initiation factor 2C;K03514//non-canonical poly(A) RNA polymerase PAPD5/7 [EC:2.7.7.19]+ko03018//RNA degradation	ATP:guanido phosphotransferase, C-terminal catalytic domain		hypothetical protein AURANDRAFT_3396, partial [Aureococcus anophagefferens] >EGB11123.1 hypothetical protein AURANDRAFT_3396, partial [Aureococcus anophagefferens]	[C] KOG3581 Creatine kinases		GO:0005524//ATP binding;GO:0016301//kinase activity
CL6011.Contig1_All	620	ko03018//RNA degradation	Genetic Information Processing	Folding, sorting and degradation	-1.88081	0.000652795	0.000486309	K12572//PAB-dependent poly(A)-specific ribonuclease subunit 3+ko03018//RNA degradation			hypothetical protein COCSUDRAFT_61018 [Coccomyxa subellipsoidea C-169] >EIE26025.1 hypothetical protein COCSUDRAFT_61018 [Coccomyxa subellipsoidea C-169]	[A] KOG3741 Poly(A) ribonuclease subunit
Unigene20284_All	1032	ko03018//RNA degradation	Genetic Information Processing	Folding, sorting and degradation	-1.89795	6.9032e-14	2.24018e-14	K03514//non-canonical poly(A) RNA polymerase PAPD5/7 [EC:2.7.7.19]+ko03018//RNA degradation	Domain of unknown function (DUF4334)	XM_009036855.1 Aureococcus anophagefferens hypothetical protein partial mRNA	hypothetical protein PHMEG_00015262 [Phytophthora megakarya]			GO:0016779//nucleotidyltransferase activity
Unigene16249_All	460	ko03018//RNA degradation	Genetic Information Processing	Folding, sorting and degradation	-1.92749	0.000693858	0.00052036	K18681//DIS3-like exonuclease 1 [EC:3.1.13.-]+ko03018//RNA degradation;K18681//DIS3-like exonuclease 1 [EC:3.1.13.-]+ko03018//RNA degradation;K02184//formin 2	Cytadhesin P30/P32		conserved unknown protein [Ectocarpus siliculosus]	[J] KOG2102 Exosomal 3'-5' exoribonuclease complex, subunit Rrp44/Dis3	Exosome complex exonuclease RRP44 homolog A OS=Arabidopsis thaliana GN=RRP44A PE=2 SV=2
Unigene44871_All	1764	ko03018//RNA degradation	Genetic Information Processing	Folding, sorting and degradation	-1.98955	4.01034e-21	9.80231e-22	K04077//chaperonin GroEL+ko03018//RNA degradation;K04077//chaperonin GroEL+ko03018//RNA degradation;K04077//chaperonin GroEL+ko03018//RNA degradation;K04077//chaperonin GroEL+ko03018//RNA degradation	TCP-1/cpn60 chaperonin family	KX284711.1 Schimmelmannia schousboei plastid, complete genome	chaperonin GroEL [Dorcoceras hygrometricum]	[O] KOG0356 Mitochondrial chaperonin, Cpn60/Hsp60p	Chaperonin CPN60-1, mitochondrial OS=Zea mays GN=CPN60I PE=1 SV=2	GO:0005524//ATP binding;GO:0042026//protein refolding;GO:0005737//cytoplasm
Unigene37303_All	1194	ko03018//RNA degradation	Genetic Information Processing	Folding, sorting and degradation	-2.033	1.38586e-57	1.69328e-58	K12572//PAB-dependent poly(A)-specific ribonuclease subunit 3+ko03018//RNA degradation;K12572//PAB-dependent poly(A)-specific ribonuclease subunit 3+ko03018//RNA degradation		XM_009034250.1 Aureococcus anophagefferens expressed protein partial mRNA	Poly(A) ribonuclease subunit [Ectocarpus siliculosus]	[A] KOG3741 Poly(A) ribonuclease subunit	Glycine-rich cell wall structural protein OS=Arabidopsis thaliana GN=At3g17050 PE=3 SV=2	GO:0006397//mRNA processing;GO:0003723//RNA binding;GO:0005524//ATP binding;GO:0031251//PAN complex;GO:0000290//deadenylation-dependent decapping of nuclear-transcribed mRNA;GO:0000932//P-body;GO:0046872//metal ion binding;GO:0090503//RNA phosphodiester bond hydrolysis, exonucleolytic;GO:0010606//positive regulation of cytoplasmic mRNA processing body assembly;GO:0004672//protein kinase activity;…
CL3697.Contig1_All	1934	ko03018//RNA degradation	Genetic Information Processing	Folding, sorting and degradation	-2.0344	1.48213e-33	2.66137e-34	K04043//molecular chaperone DnaK+ko03018//RNA degradation;K04043//molecular chaperone DnaK+ko03018//RNA degradation;K04043//molecular chaperone DnaK+ko03018//RNA degradation;K04043//molecular chaperone DnaK+ko03018//RNA degradation;K04043//molecular chaperone DnaK+ko03018//RNA degradation	Hsp70 protein	AF359566.1 Koliella antarctica cognate HSP70 mRNA, partial cds	molecular chaperone DnaK [Dorcoceras hygrometricum]	[O] KOG0102 Molecular chaperones mortalin/PBP74/GRP75, HSP70 superfamily	Heat shock 70 kDa protein 10, mitochondrial OS=Arabidopsis thaliana GN=HSP70-10 PE=1 SV=1	GO:0006457//protein folding;GO:0005524//ATP binding;GO:0051082//unfolded protein binding
CL9681.Contig1_All	2236	ko03018//RNA degradation	Genetic Information Processing	Folding, sorting and degradation	-2.18858	0	0	K04077//chaperonin GroEL+ko03018//RNA degradation;K04077//chaperonin GroEL+ko03018//RNA degradation;K04077//chaperonin GroEL+ko03018//RNA degradation;K04077//chaperonin GroEL+ko03018//RNA degradation	TCP-1/cpn60 chaperonin family	FN822777.1 Chlamydomonas reinhardtii mRNA for mitochondrial chaperonin 60 precursor (cpn60C gene)	Chaperonin Cpn60/TCP-1 [Nannochloropsis gaditana]	[O] KOG0356 Mitochondrial chaperonin, Cpn60/Hsp60p	Chaperonin CPN60-2, mitochondrial OS=Cucurbita maxima GN=CPN60-2 PE=1 SV=1	GO:0005524//ATP binding;GO:0042026//protein refolding;GO:0005737//cytoplasm
Unigene22266_All	1647	ko00130//Ubiquinone and other terpenoid-quinone biosynthesis;ko01100//Metabolic pathways;ko00960//Tropane, piperidine and pyridine alkaloid biosynthesis;ko00950//Isoquinoline alkaloid biosynthesis;ko00400//Phenylalanine, tyrosine and tryptophan biosynthesis;ko00270//Cysteine and methionine metabolism;ko00360//Phenylalanine metabolism;ko01230//Biosynthesis of amino acids;ko03018//RNA degradation;k…	Metabolism;Genetic Information Processing	Amino acid metabolism;Biosynthesis of other secondary metabolites;Folding, sorting and degradation;Metabolism of cofactors and vitamins;Global and overview maps	-2.2308	1.45947e-14	4.58913e-15	K12591//exosome complex exonuclease RRP6 [EC:3.1.13.-]+ko03018//RNA degradation;K00815//tyrosine aminotransferase [EC:2.6.1.5]+ko00130//Ubiquinone and other terpenoid-quinone biosynthesis+ko01230//Biosynthesis of amino acids+ko00960//Tropane, piperidine and pyridine alkaloid biosynthesis+ko00350//Tyrosine metabolism+ko01100//Metabolic pathways+ko00950//Isoquinoline alkaloid biosynthesis+ko01110//…	Aminotransferase class I and II		dihydrodipicolinate reductase [Plasmopara halstedii]	[E] KOG0634 Aromatic amino acid aminotransferase and related proteins	Probable aminotransferase TAT3 OS=Arabidopsis thaliana GN=TAT3 PE=2 SV=1	GO:0009058//biosynthetic process;GO:0003824//catalytic activity;GO:0030170//pyridoxal phosphate binding
CL2382.Contig2_All	1053	ko03018//RNA degradation	Genetic Information Processing	Folding, sorting and degradation	-2.28233	5.34746e-06	2.99527e-06	K00962//polyribonucleotide nucleotidyltransferase [EC:2.7.7.8]+ko03018//RNA degradation;K00962//polyribonucleotide nucleotidyltransferase [EC:2.7.7.8]+ko03018//RNA degradation;K00962//polyribonucleotide nucleotidyltransferase [EC:2.7.7.8]+ko03018//RNA degradation;K00962//polyribonucleotide nucleotidyltransferase [EC:2.7.7.8]+ko03018//RNA degradation;K00962//polyribonucleotide nucleotidyltransfera…	3' exoribonuclease family, domain 1		polyribonucleotide nucleotidyltransferase 1, chloroplastic-like [Dorcoceras hygrometricum]	[R] KOG1067 Predicted RNA-binding polyribonucleotide nucleotidyltransferase	Polyribonucleotide nucleotidyltransferase 1, chloroplastic OS=Arabidopsis thaliana GN=PNP1 PE=1 SV=1	GO:0006396//RNA processing;GO:0003723//RNA binding;GO:0004654//polyribonucleotide nucleotidyltransferase activity;GO:0006402//mRNA catabolic process
CL2869.Contig2_All	2147	ko00010//Glycolysis / Gluconeogenesis;ko00051//Fructose and mannose metabolism;ko00052//Galactose metabolism;ko03018//RNA degradation;ko01100//Metabolic pathways;ko01230//Biosynthesis of amino acids;ko01200//Carbon metabolism;ko01110//Biosynthesis of secondary metabolites;ko00030//Pentose phosphate pathway	Metabolism;Genetic Information Processing	Global and overview maps;Folding, sorting and degradation;Carbohydrate metabolism	-2.39445	1.00427e-33	1.79643e-34	K00850//6-phosphofructokinase 1 [EC:2.7.1.11]+ko00010//Glycolysis / Gluconeogenesis+ko00030//Pentose phosphate pathway+ko01230//Biosynthesis of amino acids+ko03018//RNA degradation+ko01100//Metabolic pathways+ko00052//Galactose metabolism+ko00051//Fructose and mannose metabolism+ko01110//Biosynthesis of secondary metabolites+ko01200//Carbon metabolism;K00850//6-phosphofructokinase 1 [EC:2.7.1.11]…	Phosphofructokinase		pyrophosphate-dependent phosphofructose kinase [Nannochloropsis gaditana]	[G] KOG2440 Pyrophosphate-dependent phosphofructo-1-kinase	ATP-dependent 6-phosphofructokinase 5, chloroplastic OS=Arabidopsis thaliana GN=PFK5 PE=1 SV=1	GO:0003872//6-phosphofructokinase activity;GO:0006002//fructose 6-phosphate metabolic process;GO:0005524//ATP binding;GO:0016021//integral component of membrane
CL8485.Contig4_All	1309	ko03018//RNA degradation;ko03020//RNA polymerase	Genetic Information Processing	Transcription;Folding, sorting and degradation	-2.53074	6.00771e-18	1.63942e-18	K17545//serine/threonine-protein kinase ULK4 [EC:2.7.11.1];K15601//lysine-specific demethylase 3 [EC:1.14.11.-];K03006//DNA-directed RNA polymerase II subunit RPB1 [EC:2.7.7.6]+ko03020//RNA polymerase;K04077//chaperonin GroEL+ko03018//RNA degradation	Reverse transcriptase (RNA-dependent DNA polymerase)		copia LTR rider [Solanum lycopersicum] >ABO36636.1 copia LTR rider [Solanum lycopersicum]	[R] KOG0017 FOG: Transposon-encoded proteins with TYA, reverse transcriptase, integrase domains in various combinations	Retrovirus-related Pol polyprotein from transposon TNT 1-94 OS=Nicotiana tabacum PE=2 SV=1
CL3119.Contig1_All	1869	ko03018//RNA degradation	Genetic Information Processing	Folding, sorting and degradation	-2.91893	6.43778e-17	1.83796e-17	K04043//molecular chaperone DnaK+ko03018//RNA degradation;K04043//molecular chaperone DnaK+ko03018//RNA degradation;K04043//molecular chaperone DnaK+ko03018//RNA degradation;K04043//molecular chaperone DnaK+ko03018//RNA degradation;K04043//molecular chaperone DnaK+ko03018//RNA degradation	Hsp70 protein	XM_009529715.1 Phytophthora sojae hypothetical protein partial mRNA	heat shock protein 70 / HSP70 (ISS) [Ostreococcus tauri] >CAL51819.1 Heat shock protein 70 family [Ostreococcus tauri] >OUS49588.1 heat shock protein 70 [Ostreococcus tauri]	[O] KOG0102 Molecular chaperones mortalin/PBP74/GRP75, HSP70 superfamily	Heat shock 70 kDa protein 9, mitochondrial OS=Arabidopsis thaliana GN=HSP70-9 PE=1 SV=1	GO:0006457//protein folding;GO:0005524//ATP binding;GO:0051082//unfolded protein binding
Unigene35201_All	3301	ko03018//RNA degradation	Genetic Information Processing	Folding, sorting and degradation	-3.06231	7.53964e-46	1.08013e-46	K04043//molecular chaperone DnaK+ko03018//RNA degradation;K04043//molecular chaperone DnaK+ko03018//RNA degradation;K04043//molecular chaperone DnaK+ko03018//RNA degradation	Hsp70 protein	XM_002505873.1 Micromonas commoda heat shock protein 70, mitochondrial precursor partial mRNA	molecular chaperone DnaK [Galdieria sulphuraria] >EME27298.1 molecular chaperone DnaK [Galdieria sulphuraria]	[O] KOG0102 Molecular chaperones mortalin/PBP74/GRP75, HSP70 superfamily	Heat shock 70 kDa protein, mitochondrial OS=Pisum sativum GN=HSP1 PE=2 SV=1	GO:0006457//protein folding;GO:0005524//ATP binding;GO:0051082//unfolded protein binding
CL3119.Contig3_All	3167	ko03018//RNA degradation	Genetic Information Processing	Folding, sorting and degradation	-3.25022	1.83747e-93	1.57173e-94	K04043//molecular chaperone DnaK+ko03018//RNA degradation;K04043//molecular chaperone DnaK+ko03018//RNA degradation;K04043//molecular chaperone DnaK+ko03018//RNA degradation	Hsp70 protein	XM_002505873.1 Micromonas commoda heat shock protein 70, mitochondrial precursor partial mRNA	molecular chaperone DnaK [Galdieria sulphuraria] >EME27298.1 molecular chaperone DnaK [Galdieria sulphuraria]	[O] KOG0102 Molecular chaperones mortalin/PBP74/GRP75, HSP70 superfamily	Heat shock 70 kDa protein 10, mitochondrial OS=Arabidopsis thaliana GN=HSP70-10 PE=1 SV=1	GO:0006457//protein folding;GO:0005524//ATP binding;GO:0051082//unfolded protein binding
Unigene2569_All	770	ko01230//Biosynthesis of amino acids;ko01100//Metabolic pathways;ko01200//Carbon metabolism;ko01110//Biosynthesis of secondary metabolites;ko00010//Glycolysis / Gluconeogenesis;ko03018//RNA degradation	Metabolism;Genetic Information Processing	Carbohydrate metabolism;Global and overview maps;Folding, sorting and degradation	-3.25421	1.19182e-08	5.25983e-09	K01689//enolase [EC:4.2.1.11]+ko00010//Glycolysis / Gluconeogenesis+ko01230//Biosynthesis of amino acids+ko03018//RNA degradation+ko01100//Metabolic pathways+ko01110//Biosynthesis of secondary metabolites+ko01200//Carbon metabolism;K01689//enolase [EC:4.2.1.11]+ko00010//Glycolysis / Gluconeogenesis+ko01230//Biosynthesis of amino acids+ko03018//RNA degradation+ko01100//Metabolic pathways+ko01110//…	Dpy-30 motif		conserved unknown protein [Ectocarpus siliculosus]	[G] KOG2670 Enolase	Cytosolic enolase 3 OS=Arabidopsis thaliana GN=ENO3 PE=1 SV=1	GO:0000287//magnesium ion binding;GO:0004634//phosphopyruvate hydratase activity;GO:0006096//glycolytic process;GO:0000015//phosphopyruvate hydratase complex
Unigene73094_All	1099	ko03018//RNA degradation	Genetic Information Processing	Folding, sorting and degradation	-3.53691	7.65001e-08	3.60187e-08	K00962//polyribonucleotide nucleotidyltransferase [EC:2.7.7.8]+ko03018//RNA degradation;K00962//polyribonucleotide nucleotidyltransferase [EC:2.7.7.8]+ko03018//RNA degradation;K00962//polyribonucleotide nucleotidyltransferase [EC:2.7.7.8]+ko03018//RNA degradation;K00962//polyribonucleotide nucleotidyltransferase [EC:2.7.7.8]+ko03018//RNA degradation;K00962//polyribonucleotide nucleotidyltransfera…	3' exoribonuclease family, domain 1		PREDICTED: polyribonucleotide nucleotidyltransferase 2, mitochondrial [Brassica oleracea var. oleracea]	[R] KOG1067 Predicted RNA-binding polyribonucleotide nucleotidyltransferase	Polyribonucleotide nucleotidyltransferase 1, chloroplastic OS=Arabidopsis thaliana GN=PNP1 PE=1 SV=1	GO:0006396//RNA processing;GO:0003723//RNA binding;GO:0004654//polyribonucleotide nucleotidyltransferase activity;GO:0006402//mRNA catabolic process
Unigene3720_All	614	ko03018//RNA degradation	Genetic Information Processing	Folding, sorting and degradation	-3.73484	0.00067943	0.000508884	K12613//mRNA-decapping enzyme subunit 2 [EC:3.6.1.62]+ko03018//RNA degradation;K12613//mRNA-decapping enzyme subunit 2 [EC:3.6.1.62]+ko03018//RNA degradation;K12613//mRNA-decapping enzyme subunit 2 [EC:3.6.1.62]+ko03018//RNA degradation;K12613//mRNA-decapping enzyme subunit 2 [EC:3.6.1.62]+ko03018//RNA degradation	NUDIX domain		PREDICTED: mRNA-decapping enzyme subunit 2-like [Raphanus sativus]	[A] KOG2937 Decapping enzyme complex, predicted pyrophosphatase DCP2
CL109.Contig1_All	1029	ko03018//RNA degradation	Genetic Information Processing	Folding, sorting and degradation	-4.0344	0.000115548	7.6567e-05	K00962//polyribonucleotide nucleotidyltransferase [EC:2.7.7.8]+ko03018//RNA degradation;K00962//polyribonucleotide nucleotidyltransferase [EC:2.7.7.8]+ko03018//RNA degradation;K00962//polyribonucleotide nucleotidyltransferase [EC:2.7.7.8]+ko03018//RNA degradation;K00962//polyribonucleotide nucleotidyltransferase [EC:2.7.7.8]+ko03018//RNA degradation	3' exoribonuclease family, domain 1		polyribonucleotide nucleotidyltransferase 1, chloroplastic-like [Dorcoceras hygrometricum]	[R] KOG1067 Predicted RNA-binding polyribonucleotide nucleotidyltransferase	Probable polyribonucleotide nucleotidyltransferase 1, chloroplastic OS=Oryza sativa subsp. japonica GN=PNP1 PE=2 SV=1	GO:0006396//RNA processing;GO:0003723//RNA binding;GO:0004654//polyribonucleotide nucleotidyltransferase activity;GO:0006402//mRNA catabolic process
CL3119.Contig2_All	792	ko03018//RNA degradation	Genetic Information Processing	Folding, sorting and degradation	-4.0344	0.000115548	7.6567e-05	K04043//molecular chaperone DnaK+ko03018//RNA degradation;K04043//molecular chaperone DnaK+ko03018//RNA degradation;K04043//molecular chaperone DnaK+ko03018//RNA degradation;K04043//molecular chaperone DnaK+ko03018//RNA degradation;K04043//molecular chaperone DnaK+ko03018//RNA degradation	Hsp70 protein	XM_011401901.1 Auxenochlorella protothecoides Heat shock 70 kDa protein, mitochondrial partial mRNA	molecular chaperone DnaK [Bathycoccus prasinos] >CCO17568.1 molecular chaperone DnaK [Bathycoccus prasinos]	[O] KOG0102 Molecular chaperones mortalin/PBP74/GRP75, HSP70 superfamily	Heat shock 70 kDa protein 10, mitochondrial OS=Arabidopsis thaliana GN=HSP70-10 PE=1 SV=1	GO:0006457//protein folding;GO:0005524//ATP binding;GO:0051082//unfolded protein binding
Unigene41347_All	1768	ko03018//RNA degradation	Genetic Information Processing	Folding, sorting and degradation	-4.29179	8.77778e-35	1.53486e-35	K12603//CCR4-NOT transcription complex subunit 6 [EC:3.1.13.4]+ko03018//RNA degradation	Endonuclease/Exonuclease/phosphatase family		hypothetical protein EMIHUDRAFT_216421 [Emiliania huxleyi CCMP1516] >EOD09813.1 hypothetical protein EMIHUDRAFT_216421 [Emiliania huxleyi CCMP1516]			GO:0005509//calcium ion binding
Unigene32900_All	548	ko03018//RNA degradation	Genetic Information Processing	Folding, sorting and degradation	-4.55797	1.86311e-06	9.95734e-07	K04043//molecular chaperone DnaK+ko03018//RNA degradation;K04043//molecular chaperone DnaK+ko03018//RNA degradation;K04043//molecular chaperone DnaK+ko03018//RNA degradation;K04043//molecular chaperone DnaK+ko03018//RNA degradation;K04043//molecular chaperone DnaK+ko03018//RNA degradation	Hsp70 protein	AY830127.1 Medicago sativa heat shock protein 70 (HSP70-1) mRNA, complete cds	heat shock 70 protein [Coccomyxa subellipsoidea C-169] >EIE22805.1 heat shock 70 protein [Coccomyxa subellipsoidea C-169]	[O] KOG0102 Molecular chaperones mortalin/PBP74/GRP75, HSP70 superfamily	Heat shock 70 kDa protein, mitochondrial OS=Phaseolus vulgaris PE=2 SV=1	GO:0006457//protein folding;GO:0005524//ATP binding;GO:0051082//unfolded protein binding
Unigene25375_All	1724	ko03018//RNA degradation	Genetic Information Processing	Folding, sorting and degradation	-4.58284	1.10765e-27	2.26316e-28	K12591//exosome complex exonuclease RRP6 [EC:3.1.13.-]+ko03018//RNA degradation;K12591//exosome complex exonuclease RRP6 [EC:3.1.13.-]+ko03018//RNA degradation;K12591//exosome complex exonuclease RRP6 [EC:3.1.13.-]+ko03018//RNA degradation;K12591//exosome complex exonuclease RRP6 [EC:3.1.13.-]+ko03018//RNA degradation	3'-5' exonuclease		hypothetical protein EMIHUDRAFT_419006, partial [Emiliania huxleyi CCMP1516] >EOD22656.1 hypothetical protein EMIHUDRAFT_419006, partial [Emiliania huxleyi CCMP1516]	[J] KOG2206 Exosome 3'-5' exoribonuclease complex, subunit PM/SCL-100 (Rrp6)	Protein RRP6-like 3 OS=Arabidopsis thaliana GN=RRP6L3 PE=2 SV=1	GO:0008408//3'-5' exonuclease activity;GO:0000166//nucleotide binding;GO:0005622//intracellular;GO:0003676//nucleic acid binding
Unigene28438_All	524	ko03018//RNA degradation	Genetic Information Processing	Folding, sorting and degradation	-4.73484	0.000298398	0.000210881	K04043//molecular chaperone DnaK+ko03018//RNA degradation;K04043//molecular chaperone DnaK+ko03018//RNA degradation;K04043//molecular chaperone DnaK+ko03018//RNA degradation;K04043//molecular chaperone DnaK+ko03018//RNA degradation;K04043//molecular chaperone DnaK+ko03018//RNA degradation	Hsp70 protein		PREDICTED: heat shock 70 kDa protein, mitochondrial-like [Juglans regia] >XP_018846284.1 PREDICTED: heat shock 70 kDa protein, mitochondrial-like [Juglans regia]	[O] KOG0102 Molecular chaperones mortalin/PBP74/GRP75, HSP70 superfamily	Heat shock 70 kDa protein 10, mitochondrial OS=Arabidopsis thaliana GN=HSP70-10 PE=1 SV=1
Unigene71707_All	647	ko03018//RNA degradation;ko01100//Metabolic pathways;ko00062//Fatty acid elongation;ko01212//Fatty acid metabolism	Genetic Information Processing;Metabolism	Global and overview maps;Folding, sorting and degradation;Lipid metabolism	-4.73484	0.000298398	0.000210881	K12599//antiviral helicase SKI2 [EC:3.6.4.-]+ko03018//RNA degradation;K07512//mitochondrial trans-2-enoyl-CoA reductase [EC:1.3.1.38]+ko01100//Metabolic pathways+ko00062//Fatty acid elongation+ko01212//Fatty acid metabolism;K07512//mitochondrial trans-2-enoyl-CoA reductase [EC:1.3.1.38]+ko01100//Metabolic pathways+ko00062//Fatty acid elongation+ko01212//Fatty acid metabolism;K07512//mitochondrial…	Alcohol dehydrogenase GroES-like domain		hypothetical protein H257_06435 [Aphanomyces astaci] >ETV81000.1 hypothetical protein H257_06435 [Aphanomyces astaci]	[CR] KOG1198 Zinc-binding oxidoreductase	2-methylene-furan-3-one reductase OS=Fragaria ananassa GN=EO PE=1 SV=1	GO:0016491//oxidoreductase activity
Unigene44065_All	385	ko03018//RNA degradation	Genetic Information Processing	Folding, sorting and degradation	-4.9413	9.37088e-05	6.12248e-05	K04077//chaperonin GroEL+ko03018//RNA degradation;K04077//chaperonin GroEL+ko03018//RNA degradation;K04077//chaperonin GroEL+ko03018//RNA degradation;K04077//chaperonin GroEL+ko03018//RNA degradation;K04077//chaperonin GroEL+ko03018//RNA degradation			chaperonin GroEL (plastid) [Paulinella micropora]	[O] KOG0356 Mitochondrial chaperonin, Cpn60/Hsp60p	60 kDa chaperonin, chloroplastic OS=Pyropia yezoensis GN=groL PE=3 SV=2	GO:0005524//ATP binding;GO:0051082//unfolded protein binding;GO:0009536//plastid;GO:0042026//protein refolding
Unigene57605_All	927	ko03018//RNA degradation	Genetic Information Processing	Folding, sorting and degradation	-5.35633	5.39685e-06	3.03151e-06	K00962//polyribonucleotide nucleotidyltransferase [EC:2.7.7.8]+ko03018//RNA degradation;K00962//polyribonucleotide nucleotidyltransferase [EC:2.7.7.8]+ko03018//RNA degradation	S1 RNA binding domain		polyribonucleotide nucleotidyltransferase 1, chloroplastic-like [Dorcoceras hygrometricum]	[R] KOG1067 Predicted RNA-binding polyribonucleotide nucleotidyltransferase	Probable pre-mRNA-splicing factor ATP-dependent RNA helicase DEAH5 OS=Arabidopsis thaliana GN=At3g26560 PE=1 SV=2	GO:0006396//RNA processing;GO:0016123//xanthophyll biosynthetic process;GO:0016036//cellular response to phosphate starvation;GO:0003723//RNA binding;GO:0004654//polyribonucleotide nucleotidyltransferase activity;GO:0000175//3'-5'-exoribonuclease activity;GO:0006402//mRNA catabolic process;GO:0010323//negative regulation of isopentenyl diphosphate biosynthetic process, methylerythritol 4-phosphat…
Unigene65105_All	802	ko03018//RNA degradation	Genetic Information Processing	Folding, sorting and degradation	-5.9886	1.29629e-08	5.73963e-09	K04077//chaperonin GroEL+ko03018//RNA degradation;K04077//chaperonin GroEL+ko03018//RNA degradation;K04077//chaperonin GroEL+ko03018//RNA degradation;K04077//chaperonin GroEL+ko03018//RNA degradation;K04077//chaperonin GroEL+ko03018//RNA degradation	TCP-1/cpn60 chaperonin family		chaperonin GroEL [Dorcoceras hygrometricum]	[O] KOG0356 Mitochondrial chaperonin, Cpn60/Hsp60p	60 kDa chaperonin, cyanelle OS=Cyanophora paradoxa GN=groL-A PE=3 SV=1	GO:0005524//ATP binding;GO:0051082//unfolded protein binding;GO:0009536//plastid;GO:0042026//protein refolding
Unigene65104_All	1100	ko03018//RNA degradation	Genetic Information Processing	Folding, sorting and degradation	-6.0344	7.59615e-09	3.30899e-09	K04077//chaperonin GroEL+ko03018//RNA degradation;K04077//chaperonin GroEL+ko03018//RNA degradation;K04077//chaperonin GroEL+ko03018//RNA degradation;K04077//chaperonin GroEL+ko03018//RNA degradation	TCP-1/cpn60 chaperonin family		chaperonin GroEL (plastid) [Cryptomonas curvata] >ASO75713.1 chaperonin GroEL (plastid) [Cryptomonas curvata]	[O] KOG0356 Mitochondrial chaperonin, Cpn60/Hsp60p	60 kDa chaperonin, chloroplastic OS=Guillardia theta GN=groL PE=3 SV=1	GO:0005524//ATP binding;GO:0042026//protein refolding;GO:0005737//cytoplasm
Unigene66073_All	2338	ko01100//Metabolic pathways;ko01200//Carbon metabolism;ko01230//Biosynthesis of amino acids;ko01110//Biosynthesis of secondary metabolites;ko03018//RNA degradation;ko00010//Glycolysis / Gluconeogenesis	Genetic Information Processing;Metabolism	Carbohydrate metabolism;Global and overview maps;Folding, sorting and degradation	-6.04003	3.92401e-62	4.51667e-63	K01689//enolase [EC:4.2.1.11]+ko00010//Glycolysis / Gluconeogenesis+ko01230//Biosynthesis of amino acids+ko03018//RNA degradation+ko01100//Metabolic pathways+ko01110//Biosynthesis of secondary metabolites+ko01200//Carbon metabolism;K01689//enolase [EC:4.2.1.11]+ko00010//Glycolysis / Gluconeogenesis+ko01230//Biosynthesis of amino acids+ko03018//RNA degradation+ko01100//Metabolic pathways+ko01110//…	Enolase, C-terminal TIM barrel domain		enolase (plastid) [Paulinella micropora]	[G] KOG2670 Enolase	Enolase OS=Oryza sativa subsp. japonica GN=ENO1 PE=1 SV=2	GO:0000287//magnesium ion binding;GO:0004634//phosphopyruvate hydratase activity;GO:0006096//glycolytic process;GO:0000015//phosphopyruvate hydratase complex;GO:0009536//plastid
CL8212.Contig3_All	1855	ko03018//RNA degradation	Genetic Information Processing	Folding, sorting and degradation	-7.78929	1.89834e-24	4.20364e-25	K04077//chaperonin GroEL+ko03018//RNA degradation;K04077//chaperonin GroEL+ko03018//RNA degradation;K04077//chaperonin GroEL+ko03018//RNA degradation;K04077//chaperonin GroEL+ko03018//RNA degradation	Amidohydrolase		chaperonin CPN60-1, mitochondrial precursor [Blastocystis sp. ATCC 50177/Nand II]	[O] KOG0356 Mitochondrial chaperonin, Cpn60/Hsp60p	60 kDa chaperonin, chloroplastic OS=Cyanidium caldarium GN=groL PE=3 SV=1	GO:0005524//ATP binding;GO:0042026//protein refolding;GO:0005737//cytoplasm;GO:0009507//chloroplast

## Sheet: RNA polymerace
Supplementary Table 6:	Differentially expressed genes involved in RNA polymerace metabolism
Gene ID	Length	Pathway Name	Level 1	Level 2	log2(He_1000/He_400)	Qvalue(He_400-vs-He_1000)	Pvalue(He_400-vs-He_1000)	Kegg Orthology	Pfam	Nt	Nr	Kog	Swissprot	GO
Unigene14225_All	4303	ko03020//RNA polymerase	Genetic Information Processing	Transcription	9.74236	2.02279e-74	2.04718e-75	K02184//formin 2;K03006//DNA-directed RNA polymerase II subunit RPB1 [EC:2.7.7.6]+ko03020//RNA polymerase;K19984//exocyst complex component 5;K02184//formin 2	Fungal Zn(2)-Cys(6) binuclear cluster domain		formin-like protein 18 [Aegilops tauschii subsp. tauschii]	[M] LSE0601 A Pollen extensin-like protein (Pex)	Leucine-rich repeat extensin-like protein 5 OS=Arabidopsis thaliana GN=LRX5 PE=2 SV=2
Unigene9360_All	1696	ko03020//RNA polymerase	Genetic Information Processing	Transcription	9.54457	8.04201e-67	8.79888e-68	K03046//DNA-directed RNA polymerase subunit beta' [EC:2.7.7.6]+ko03020//RNA polymerase		KY124271.1 Paulinella sp. DL-2016a strain FK01 plastid, complete genome	hypothetical protein M569_00222, partial [Genlisea aurea]
CL2639.Contig2_All	1416	ko03020//RNA polymerase	Genetic Information Processing	Transcription	7.11818	5.58445e-17	1.58838e-17	K03006//DNA-directed RNA polymerase II subunit RPB1 [EC:2.7.7.6]+ko03020//RNA polymerase;K03006//DNA-directed RNA polymerase II subunit RPB1 [EC:2.7.7.6]+ko03020//RNA polymerase;K03006//DNA-directed RNA polymerase II subunit RPB1 [EC:2.7.7.6]+ko03020//RNA polymerase;K03006//DNA-directed RNA polymerase II subunit RPB1 [EC:2.7.7.6]+ko03020//RNA polymerase;K03006//DNA-directed RNA polymerase II subu…	Tryptophan-associated transmembrane protein (Trp_oprn_chp)		36.4 kDa proline-rich protein-like [Chenopodium quinoa]	[Y] KOG2992 Nucleolar GTPase/ATPase p130	Leucine-rich repeat extensin-like protein 3 OS=Arabidopsis thaliana GN=LRX3 PE=1 SV=1
CL295.Contig8_All	1085	ko03020//RNA polymerase	Genetic Information Processing	Transcription	6.02129	1.9206e-118	1.38481e-119	K03006//DNA-directed RNA polymerase II subunit RPB1 [EC:2.7.7.6]+ko03020//RNA polymerase	PT repeat		hypothetical protein SDRG_15585 [Saprolegnia diclina VS20] >EQC26647.1 hypothetical protein SDRG_15585 [Saprolegnia diclina VS20]	[K] KOG0260 RNA polymerase II, large subunit	DNA-directed RNA polymerase II subunit 1 OS=Arabidopsis thaliana GN=NRPB1 PE=1 SV=3
Unigene6885_All	1713	ko03010//Ribosome;ko03020//RNA polymerase	Genetic Information Processing	Translation;Transcription	4.90964	1.05361e-71	1.09407e-72	K03046//DNA-directed RNA polymerase subunit beta' [EC:2.7.7.6]+ko03020//RNA polymerase;K02948//small subunit ribosomal protein S11+ko03010//Ribosome		KY124271.1 Paulinella sp. DL-2016a strain FK01 plastid, complete genome	hypothetical protein M569_00222, partial [Genlisea aurea]
Unigene55785_All	562	ko03020//RNA polymerase	Genetic Information Processing	Transcription	3.77295	0.000476887	0.000347341	K03006//DNA-directed RNA polymerase II subunit RPB1 [EC:2.7.7.6]+ko03020//RNA polymerase;K04733//interleukin-1 receptor-associated kinase 4 [EC:2.7.11.1];K04733//interleukin-1 receptor-associated kinase 4 [EC:2.7.11.1];K04733//interleukin-1 receptor-associated kinase 4 [EC:2.7.11.1]			UDP-N-acetylglucosamine-peptide N-acetylglucosaminyltransferase, partial [Thraustotheca clavata]	[S] LSE0042 A Uncharacterized plastocyanin-like protein, probably non-copper-binding	Extensin OS=Zea mays GN=HRGP PE=2 SV=1
CL5389.Contig2_All	780	ko03020//RNA polymerase	Genetic Information Processing	Transcription	3.36072	4.83723e-11	1.82562e-11	K04733//interleukin-1 receptor-associated kinase 4 [EC:2.7.11.1];K03006//DNA-directed RNA polymerase II subunit RPB1 [EC:2.7.7.6]+ko03020//RNA polymerase;K04733//interleukin-1 receptor-associated kinase 4 [EC:2.7.11.1];K03006//DNA-directed RNA polymerase II subunit RPB1 [EC:2.7.7.6]+ko03020//RNA polymerase;K11294//nucleolin	Virion protein N terminal domain		uncharacterized protein [Blastocystis hominis] >CBK20048.2 unnamed protein product [Blastocystis hominis]	[Y] KOG2992 Nucleolar GTPase/ATPase p130	Protein Ycf2 OS=Oenothera elata subsp. hookeri GN=ycf2-A PE=3 SV=2
Unigene1508_All	1382	ko03020//RNA polymerase;ko01100//Metabolic pathways;ko00040//Pentose and glucuronate interconversions	Genetic Information Processing;Metabolism	Transcription;Carbohydrate metabolism;Global and overview maps	3.04532	4.03317e-32	7.47165e-33	K22020//mucin-19;K01051//pectinesterase [EC:3.1.1.11]+ko00040//Pentose and glucuronate interconversions+ko01100//Metabolic pathways;K03006//DNA-directed RNA polymerase II subunit RPB1 [EC:2.7.7.6]+ko03020//RNA polymerase;K17987//next to BRCA1 gene 1 protein	Histidine kinase-, DNA gyrase B-, and HSP90-like ATPase		hypothetical protein BU14_0478s0001 [Porphyra umbilicalis]	[J] KOG3434 60S ribosomal protein L22	Vegetative cell wall protein gp1 OS=Chlamydomonas reinhardtii GN=GP1 PE=1 SV=1
Unigene25502_All	3219	ko03010//Ribosome;ko03020//RNA polymerase	Genetic Information Processing	Translation;Transcription	2.71192	0.000606791	0.000450121	K03040//DNA-directed RNA polymerase subunit alpha [EC:2.7.7.6]+ko03020//RNA polymerase;K03040//DNA-directed RNA polymerase subunit alpha [EC:2.7.7.6]+ko03020//RNA polymerase;K03040//DNA-directed RNA polymerase subunit alpha [EC:2.7.7.6]+ko03020//RNA polymerase;K03040//DNA-directed RNA polymerase subunit alpha [EC:2.7.7.6]+ko03020//RNA polymerase;K02986//small subunit ribosomal protein S4+ko03010/…	Ribosomal protein S11		[pt] DNA-directed RNA polymerase subunit alpha [Galdieria sulphuraria] >EME28488.1 [pt] DNA-directed RNA polymerase subunit alpha [Galdieria sulphuraria]	[J] KOG0408 Mitochondrial/chloroplast ribosomal protein S11	DNA-directed RNA polymerase subunit alpha OS=Cyanidium caldarium GN=rpoA PE=3 SV=1	GO:0005840//ribosome;GO:0003723//RNA binding;GO:0003677//DNA binding;GO:0006351//transcription, DNA-templated;GO:0046983//protein dimerization activity;GO:0003899//DNA-directed 5'-3' RNA polymerase activity;GO:0006412//translation;GO:0009536//plastid;GO:0003735//structural constituent of ribosome
CL1048.Contig2_All	1148	ko03020//RNA polymerase	Genetic Information Processing	Transcription	2.5742	0	0	K03006//DNA-directed RNA polymerase II subunit RPB1 [EC:2.7.7.6]+ko03020//RNA polymerase;K03006//DNA-directed RNA polymerase II subunit RPB1 [EC:2.7.7.6]+ko03020//RNA polymerase;K03006//DNA-directed RNA polymerase II subunit RPB1 [EC:2.7.7.6]+ko03020//RNA polymerase;K03006//DNA-directed RNA polymerase II subunit RPB1 [EC:2.7.7.6]+ko03020//RNA polymerase;K03006//DNA-directed RNA polymerase II subu…	UPF0506		36.4 kDa proline-rich protein-like [Chenopodium quinoa]	[S] KOG1181 FOG: Low-complexity	Classical arabinogalactan protein 9 OS=Arabidopsis thaliana GN=AGP9 PE=1 SV=2	GO:0008289//lipid binding;GO:0006355//regulation of transcription, DNA-templated;GO:0006950//response to stress
Unigene12738_All	1893	ko03020//RNA polymerase	Genetic Information Processing	Transcription	2.33294	3.45713e-82	3.23598e-83	K04730//interleukin-1 receptor-associated kinase 1 [EC:2.7.11.1];K03006//DNA-directed RNA polymerase II subunit RPB1 [EC:2.7.7.6]+ko03020//RNA polymerase			hypothetical protein THAOC_28844 [Thalassiosira oceanica]	[T] KOG1187 Serine/threonine protein kinase	Proline-rich receptor-like protein kinase PERK2 OS=Arabidopsis thaliana GN=PERK2 PE=2 SV=3
CL9390.Contig1_All	1755	ko03020//RNA polymerase	Genetic Information Processing	Transcription	2.19722	8.98245e-92	7.79001e-93	K22020//mucin-19;K03006//DNA-directed RNA polymerase II subunit RPB1 [EC:2.7.7.6]+ko03020//RNA polymerase;K03006//DNA-directed RNA polymerase II subunit RPB1 [EC:2.7.7.6]+ko03020//RNA polymerase	Sugar-tranasporters, 12 TM	XM_009042622.1 Aureococcus anophagefferens hypothetical protein partial mRNA	hypothetical protein GUITHDRAFT_78339 [Guillardia theta CCMP2712] >EKX37240.1 hypothetical protein GUITHDRAFT_78339 [Guillardia theta CCMP2712]	[K] KOG0260 RNA polymerase II, large subunit	Glycine-rich cell wall structural protein 1.8 OS=Phaseolus vulgaris PE=2 SV=1	GO:0016021//integral component of membrane;GO:0015098//molybdate ion transmembrane transporter activity
Unigene39162_All	917	ko03020//RNA polymerase;ko03010//Ribosome	Genetic Information Processing	Translation;Transcription	2.15322	6.59173e-06	3.73452e-06	K03040//DNA-directed RNA polymerase subunit alpha [EC:2.7.7.6]+ko03020//RNA polymerase;K02948//small subunit ribosomal protein S11+ko03010//Ribosome;K02948//small subunit ribosomal protein S11+ko03010//Ribosome;K02948//small subunit ribosomal protein S11+ko03010//Ribosome;K02948//small subunit ribosomal protein S11+ko03010//Ribosome	Ribosomal protein S11		PREDICTED: uncharacterized protein LOC103941582 [Pyrus x bretschneideri]	[J] KOG0408 Mitochondrial/chloroplast ribosomal protein S11	30S ribosomal protein S11, chloroplastic OS=Heterosigma akashiwo (strain NIES-293) GN=rps11 PE=3 SV=1	GO:0005840//ribosome;GO:0006412//translation;GO:0003735//structural constituent of ribosome;GO:0009536//plastid;GO:0019843//rRNA binding
Unigene10110_All	5190	ko00940//Phenylpropanoid biosynthesis;ko01110//Biosynthesis of secondary metabolites;ko03020//RNA polymerase;ko01100//Metabolic pathways	Genetic Information Processing;Metabolism	Biosynthesis of other secondary metabolites;Global and overview maps;Transcription	2.10619	2.44177e-183	1.25574e-184	K03006//DNA-directed RNA polymerase II subunit RPB1 [EC:2.7.7.6]+ko03020//RNA polymerase;K02184//formin 2;K00430//peroxidase [EC:1.11.1.7]+ko01100//Metabolic pathways+ko01110//Biosynthesis of secondary metabolites+ko00940//Phenylpropanoid biosynthesis;K00430//peroxidase [EC:1.11.1.7]+ko01100//Metabolic pathways+ko01110//Biosynthesis of secondary metabolites+ko00940//Phenylpropanoid biosynthesis	Sulfatase	XM_014047637.1 Monoraphidium neglectum hypothetical protein mRNA	Formylglycine-dependent sulfatase, C-terminal fragment Formylglycine-dependent sulfatase, N-terminal [Ectocarpus siliculosus]	[R] KOG3867 Sulfatase	Classical arabinogalactan protein 9 OS=Arabidopsis thaliana GN=AGP9 PE=1 SV=2	GO:0008152//metabolic process;GO:0016757//transferase activity, transferring glycosyl groups;GO:0008484//sulfuric ester hydrolase activity
Unigene55784_All	1041	ko03013//RNA transport;ko03020//RNA polymerase;ko03040//Spliceosome;ko03015//mRNA surveillance pathway	Genetic Information Processing	Translation;Transcription	2.08107	0.000431934	0.000312263	K12875//apoptotic chromatin condensation inducer in the nucleus+ko03040//Spliceosome+ko03015//mRNA surveillance pathway+ko03013//RNA transport;K03006//DNA-directed RNA polymerase II subunit RPB1 [EC:2.7.7.6]+ko03020//RNA polymerase	PT repeat		carbohydrate-binding protein [Thraustotheca clavata]	[M] LSE0024 A Pectinesterase	Early nodulin-20 OS=Medicago truncatula GN=ENOD20 PE=3 SV=1
CL315.Contig2_All	1378	ko03020//RNA polymerase	Genetic Information Processing	Transcription	1.85868	5.79501e-11	2.19618e-11	K10990//RecQ-mediated genome instability protein 1;K03006//DNA-directed RNA polymerase II subunit RPB1 [EC:2.7.7.6]+ko03020//RNA polymerase	Conotoxin I-superfamily		hypothetical protein FRACYDRAFT_243127 [Fragilariopsis cylindrus CCMP1102]	[WV] KOG1216 von Willebrand factor and related coagulation proteins	Extensin OS=Zea mays GN=HRGP PE=2 SV=1	GO:0004252//serine-type endopeptidase activity;GO:0016539//intein-mediated protein splicing;GO:0008237//metallopeptidase activity;GO:0008233//peptidase activity;GO:0005576//extracellular region;GO:0016021//integral component of membrane
CL295.Contig9_All	1522	ko03020//RNA polymerase	Genetic Information Processing	Transcription	1.68515	0	0	K03006//DNA-directed RNA polymerase II subunit RPB1 [EC:2.7.7.6]+ko03020//RNA polymerase;K03006//DNA-directed RNA polymerase II subunit RPB1 [EC:2.7.7.6]+ko03020//RNA polymerase	PT repeat		hypothetical protein Naga_101468g1, partial [Nannochloropsis gaditana]	[K] KOG0260 RNA polymerase II, large subunit	DNA-directed RNA polymerase II subunit 1 OS=Arabidopsis thaliana GN=NRPB1 PE=1 SV=3
CL4437.Contig3_All	3639	ko03020//RNA polymerase;ko04144//Endocytosis	Genetic Information Processing;Cellular Processes	Transport and catabolism;Transcription	1.51688	2.84607e-22	6.70582e-23	K17545//serine/threonine-protein kinase ULK4 [EC:2.7.11.1];K22686//pro-apoptotic serine protease NMA111 [EC:3.4.21.-];K01528//dynamin GTPase [EC:3.6.5.5]+ko04144//Endocytosis;K03006//DNA-directed RNA polymerase II subunit RPB1 [EC:2.7.7.6]+ko03020//RNA polymerase	Reverse transcriptase (RNA-dependent DNA polymerase)		hypothetical protein VITISV_027174 [Vitis vinifera]	[R] KOG0017 FOG: Transposon-encoded proteins with TYA, reverse transcriptase, integrase domains in various combinations	Uncharacterized mitochondrial protein AtMg00820 OS=Arabidopsis thaliana GN=AtMg00820 PE=4 SV=1
Unigene13135_All	1755	ko03020//RNA polymerase	Genetic Information Processing	Transcription	1.44191	2.70608e-45	3.90179e-46	K03046//DNA-directed RNA polymerase subunit beta' [EC:2.7.7.6]+ko03020//RNA polymerase		CP000815.1 Paulinella chromatophora chromatophore, complete genome	hypothetical protein M569_00222, partial [Genlisea aurea]
CL11033.Contig1_All	1160	ko03020//RNA polymerase	Genetic Information Processing	Transcription	1.41838	2.13857e-159	1.23143e-160	K04730//interleukin-1 receptor-associated kinase 1 [EC:2.7.11.1];K03006//DNA-directed RNA polymerase II subunit RPB1 [EC:2.7.7.6]+ko03020//RNA polymerase;K04733//interleukin-1 receptor-associated kinase 4 [EC:2.7.11.1]	NAD dependent epimerase/dehydratase family		mRNA binding protein [Ectocarpus siliculosus]	[T] KOG1187 Serine/threonine protein kinase	Proline-rich receptor-like protein kinase PERK1 OS=Arabidopsis thaliana GN=PERK1 PE=2 SV=1
Unigene30230_All	1392	ko03020//RNA polymerase	Genetic Information Processing	Transcription	1.35119	0	0	K04730//interleukin-1 receptor-associated kinase 1 [EC:2.7.11.1];K03006//DNA-directed RNA polymerase II subunit RPB1 [EC:2.7.7.6]+ko03020//RNA polymerase	Preprotein translocase subunit Sec66		predicted protein [Phaeodactylum tricornutum CCAP 1055/1] >EEC50571.1 predicted protein [Phaeodactylum tricornutum CCAP 1055/1]			GO:0031207//Sec62/Sec63 complex;GO:0016021//integral component of membrane;GO:0031204//posttranslational protein targeting to membrane, translocation
CL9390.Contig2_All	1764	ko03020//RNA polymerase	Genetic Information Processing	Transcription	1.30438	6.43101e-42	9.78739e-43	K22020//mucin-19;K03006//DNA-directed RNA polymerase II subunit RPB1 [EC:2.7.7.6]+ko03020//RNA polymerase;K03006//DNA-directed RNA polymerase II subunit RPB1 [EC:2.7.7.6]+ko03020//RNA polymerase;K03006//DNA-directed RNA polymerase II subunit RPB1 [EC:2.7.7.6]+ko03020//RNA polymerase	Sugar-tranasporters, 12 TM	XM_009042622.1 Aureococcus anophagefferens hypothetical protein partial mRNA	hypothetical protein GUITHDRAFT_78339 [Guillardia theta CCMP2712] >EKX37240.1 hypothetical protein GUITHDRAFT_78339 [Guillardia theta CCMP2712]	[K] KOG0260 RNA polymerase II, large subunit	Glycine-rich cell wall structural protein 1.8 OS=Phaseolus vulgaris PE=2 SV=1	GO:0016021//integral component of membrane;GO:0015098//molybdate ion transmembrane transporter activity
Unigene14181_All	3311	ko00910//Nitrogen metabolism;ko00760//Nicotinate and nicotinamide metabolism;ko00520//Amino sugar and nucleotide sugar metabolism;ko00052//Galactose metabolism;ko00630//Glyoxylate and dicarboxylate metabolism;ko01100//Metabolic pathways;ko03020//RNA polymerase;ko00053//Ascorbate and aldarate metabolism;ko00040//Pentose and glucuronate interconversions	Metabolism;Genetic Information Processing	Carbohydrate metabolism;Global and overview maps;Metabolism of cofactors and vitamins;Energy metabolism;Transcription	1.26963	1.24296e-78	1.20095e-79	K03517//quinolinate synthase [EC:2.5.1.72]+ko01100//Metabolic pathways+ko00760//Nicotinate and nicotinamide metabolism;K12447//UDP-sugar pyrophosphorylase [EC:2.7.7.64]+ko00520//Amino sugar and nucleotide sugar metabolism+ko00040//Pentose and glucuronate interconversions+ko01100//Metabolic pathways+ko00052//Galactose metabolism+ko00053//Ascorbate and aldarate metabolism;K03006//DNA-directed RNA p…	Reverse transcriptase (RNA-dependent DNA polymerase)		putative polyprotein [Albugo laibachii Nc14]	[R] KOG0017 FOG: Transposon-encoded proteins with TYA, reverse transcriptase, integrase domains in various combinations	Retrovirus-related Pol polyprotein from transposon TNT 1-94 OS=Nicotiana tabacum PE=2 SV=1
Unigene42413_All	945	ko03020//RNA polymerase	Genetic Information Processing	Transcription	1.15963	1.24301e-97	1.03274e-98	K03016//DNA-directed RNA polymerases I, II, and III subunit RPABC3+ko03020//RNA polymerase;K03016//DNA-directed RNA polymerases I, II, and III subunit RPABC3+ko03020//RNA polymerase;K03016//DNA-directed RNA polymerases I, II, and III subunit RPABC3+ko03020//RNA polymerase;K03016//DNA-directed RNA polymerases I, II, and III subunit RPABC3+ko03020//RNA polymerase;K03016//DNA-directed RNA polymerase…	RNA polymerase Rpb8		DNA-directed RNA polymerase I, II, and III subunit rpabc3, putative [Phytophthora infestans T30-4] >XP_008893462.1 hypothetical protein PPTG_01825 [Phytophthora parasitica INRA-310] >EEY55741.1 DNA-directed RNA polymerase I, II, and III subunit rpabc3, putative [Phytophthora infestans T30-4] >ETI44931.1 hypothetical protein F443_10376 [Phytophthora parasitica P1569] >ETK84932.1 hypothetical prote…	[K] KOG3400 RNA polymerase subunit 8	DNA-directed RNA polymerases II and V subunit 8A OS=Arabidopsis thaliana GN=NRPB8A PE=1 SV=1	GO:0005665//DNA-directed RNA polymerase II, core complex;GO:0006360//transcription from RNA polymerase I promoter;GO:0006351//transcription, DNA-templated;GO:0005666//DNA-directed RNA polymerase III complex;GO:0006366//transcription from RNA polymerase II promoter;GO:0003899//DNA-directed 5'-3' RNA polymerase activity;GO:0005736//DNA-directed RNA polymerase I complex;GO:0006383//transcription fro…
Unigene732_All	2170	ko03020//RNA polymerase	Genetic Information Processing	Transcription	1.11648	2.25101e-32	4.14702e-33	K22020//mucin-19;K19719//collagen, type II, alpha;K03006//DNA-directed RNA polymerase II subunit RPB1 [EC:2.7.7.6]+ko03020//RNA polymerase	Cyclic nucleotide-binding domain		cyclic nucleotide-binding protein [Ectocarpus siliculosus]	[W] KOG3544 Collagens (type IV and type XIII), and related proteins	Protein transport protein Sec24-like CEF OS=Arabidopsis thaliana GN=CEF PE=2 SV=3
Unigene8776_All	3377	ko01100//Metabolic pathways;ko00052//Galactose metabolism;ko00053//Ascorbate and aldarate metabolism;ko00520//Amino sugar and nucleotide sugar metabolism;ko04144//Endocytosis;ko00040//Pentose and glucuronate interconversions;ko03020//RNA polymerase	Genetic Information Processing;Cellular Processes;Metabolism	Transport and catabolism;Transcription;Global and overview maps;Carbohydrate metabolism	1.03061	1.05042e-05	6.09224e-06	K22686//pro-apoptotic serine protease NMA111 [EC:3.4.21.-];K12447//UDP-sugar pyrophosphorylase [EC:2.7.7.64]+ko00520//Amino sugar and nucleotide sugar metabolism+ko00040//Pentose and glucuronate interconversions+ko01100//Metabolic pathways+ko00052//Galactose metabolism+ko00053//Ascorbate and aldarate metabolism;K17545//serine/threonine-protein kinase ULK4 [EC:2.7.11.1];K03006//DNA-directed RNA po…	Reverse transcriptase (RNA-dependent DNA polymerase)		hypothetical protein VITISV_027174 [Vitis vinifera]	[R] KOG0017 FOG: Transposon-encoded proteins with TYA, reverse transcriptase, integrase domains in various combinations	Uncharacterized mitochondrial protein AtMg00820 OS=Arabidopsis thaliana GN=AtMg00820 PE=4 SV=1
Unigene27355_All	10604	ko03020//RNA polymerase	Genetic Information Processing	Transcription	1.0267	0	0	K03046//DNA-directed RNA polymerase subunit beta' [EC:2.7.7.6]+ko03020//RNA polymerase;K03043//DNA-directed RNA polymerase subunit beta [EC:2.7.7.6]+ko03020//RNA polymerase;K03043//DNA-directed RNA polymerase subunit beta [EC:2.7.7.6]+ko03020//RNA polymerase;K03043//DNA-directed RNA polymerase subunit beta [EC:2.7.7.6]+ko03020//RNA polymerase;K03043//DNA-directed RNA polymerase subunit beta [EC:2…	RNA polymerase Rpb2, domain 6	EU168190.1 Heterosigma akashiwo strain NIES 293 chloroplast, complete genome	RNA polymerase beta'' subunit [Heterosigma akashiwo] >ABV65976.1 DNA-directed RNA polymerase beta'' subunit (chloroplast) [Heterosigma akashiwo] >BBA18184.1 DNA-directed RNA polymerase beta'' subunit (chloroplast) [Heterosigma akashiwo]	[J] KOG0832 Mitochondrial/chloroplast ribosomal protein S2	DNA-directed RNA polymerase subunit beta OS=Heterosigma akashiwo GN=rpoB PE=3 SV=1	GO:0003899//DNA-directed 5'-3' RNA polymerase activity;GO:0032549//ribonucleoside binding;GO:0003677//DNA binding;GO:0006351//transcription, DNA-templated;GO:0009507//chloroplast
Unigene11141_All	1819	ko03020//RNA polymerase	Genetic Information Processing	Transcription	1.01911	0.000213206	0.000146927	K03046//DNA-directed RNA polymerase subunit beta' [EC:2.7.7.6]+ko03020//RNA polymerase		LC269924.1 Heterosigma akashiwo chloroplast DNA, complete genome, isolate: CCMP1596	BnaCnng13060D [Brassica napus]
CL966.Contig3_All	2958	ko03020//RNA polymerase;ko03040//Spliceosome;ko00040//Pentose and glucuronate interconversions;ko01100//Metabolic pathways;ko03015//mRNA surveillance pathway;ko03013//RNA transport	Metabolism;Genetic Information Processing	Global and overview maps;Translation;Carbohydrate metabolism;Transcription	1.01367	3.94299e-25	8.57108e-26	K01051//pectinesterase [EC:3.1.1.11]+ko00040//Pentose and glucuronate interconversions+ko01100//Metabolic pathways;K03006//DNA-directed RNA polymerase II subunit RPB1 [EC:2.7.7.6]+ko03020//RNA polymerase;K10990//RecQ-mediated genome instability protein 1;K12875//apoptotic chromatin condensation inducer in the nucleus+ko03040//Spliceosome+ko03015//mRNA surveillance pathway+ko03013//RNA transport;K…	Sulfatase		hypothetical protein H310_03146 [Aphanomyces invadans] >ETW07074.1 hypothetical protein H310_03146 [Aphanomyces invadans]	[WV] KOG1216 von Willebrand factor and related coagulation proteins	Protein TIC 214 OS=Cucumis sativus GN=TIC214 PE=3 SV=2	GO:0016539//intein-mediated protein splicing;GO:0008233//peptidase activity;GO:0016021//integral component of membrane
CL3.Contig27_All	1372	ko03020//RNA polymerase	Genetic Information Processing	Transcription	-1.04571	8.65114e-06	4.95713e-06	K03006//DNA-directed RNA polymerase II subunit RPB1 [EC:2.7.7.6]+ko03020//RNA polymerase	Ankyrin repeats (many copies)		hypothetical protein PHYSODRAFT_320753 [Phytophthora sojae] >EGZ26878.1 hypothetical protein PHYSODRAFT_320753 [Phytophthora sojae]
CL2592.Contig12_All	4761	ko03020//RNA polymerase;ko04144//Endocytosis	Genetic Information Processing;Cellular Processes	Transcription;Transport and catabolism	-1.04661	3.51807e-47	4.94378e-48	K03006//DNA-directed RNA polymerase II subunit RPB1 [EC:2.7.7.6]+ko03020//RNA polymerase;K17545//serine/threonine-protein kinase ULK4 [EC:2.7.11.1];K01528//dynamin GTPase [EC:3.6.5.5]+ko04144//Endocytosis;K22686//pro-apoptotic serine protease NMA111 [EC:3.4.21.-]	Reverse transcriptase (RNA-dependent DNA polymerase)	AP015035.1 Vigna angularis var. angularis DNA, chromosome 2, almost complete sequence, cultivar: Shumari	copia-type polyprotein [Arabidopsis thaliana] >CAC37622.1 polyprotein [Arabidopsis thaliana]	[R] KOG0017 FOG: Transposon-encoded proteins with TYA, reverse transcriptase, integrase domains in various combinations	Uncharacterized mitochondrial protein AtMg00820 OS=Arabidopsis thaliana GN=AtMg00820 PE=4 SV=1
Unigene6465_All	2583	ko03020//RNA polymerase	Genetic Information Processing	Transcription	-1.0515	5.40095e-142	3.4391e-143	K03006//DNA-directed RNA polymerase II subunit RPB1 [EC:2.7.7.6]+ko03020//RNA polymerase;K03006//DNA-directed RNA polymerase II subunit RPB1 [EC:2.7.7.6]+ko03020//RNA polymerase;K02184//formin 2	Fatty acid desaturase		hypothetical protein FisN_18Lu093 [Fistulifera solaris]	[T] KOG1187 Serine/threonine protein kinase	Proline-rich receptor-like protein kinase PERK2 OS=Arabidopsis thaliana GN=PERK2 PE=2 SV=3
CL11111.Contig3_All	1494	ko04145//Phagosome;ko03020//RNA polymerase;ko03060//Protein export;ko04141//Protein processing in endoplasmic reticulum	Cellular Processes;Genetic Information Processing	Transcription;Folding, sorting and degradation;Transport and catabolism	-1.05417	1.48676e-06	7.84936e-07	K10956//protein transport protein SEC61 subunit alpha+ko04145//Phagosome+ko04141//Protein processing in endoplasmic reticulum+ko03060//Protein export;K03006//DNA-directed RNA polymerase II subunit RPB1 [EC:2.7.7.6]+ko03020//RNA polymerase			hypothetical protein H257_17087 [Aphanomyces astaci] >ETV66525.1 hypothetical protein H257_17087 [Aphanomyces astaci]		Vegetative cell wall protein gp1 OS=Chlamydomonas reinhardtii GN=GP1 PE=1 SV=1	GO:0016021//integral component of membrane
Unigene18449_All	1158	ko03020//RNA polymerase	Genetic Information Processing	Transcription	-1.06137	1.04173e-05	6.03956e-06	K02999//DNA-directed RNA polymerase I subunit RPA1 [EC:2.7.7.6]+ko03020//RNA polymerase;K02999//DNA-directed RNA polymerase I subunit RPA1 [EC:2.7.7.6]+ko03020//RNA polymerase	RNA polymerase Rpb1, domain 2	XM_005774561.1 Emiliania huxleyi CCMP1516 hypothetical protein partial mRNA	DNA-directed RNA polymerase I subunit RPA1 [Nannochloropsis gaditana CCMP526] >EKU21384.1 DNA-directed RNA polymerase I subunit RPA1 [Nannochloropsis gaditana CCMP526]	[K] KOG0262 RNA polymerase I, large subunit	DNA-directed RNA polymerase I subunit 1 OS=Arabidopsis thaliana GN=NRPA1 PE=3 SV=1	GO:0003899//DNA-directed 5'-3' RNA polymerase activity;GO:0003677//DNA binding;GO:0005634//nucleus;GO:0006360//transcription from RNA polymerase I promoter;GO:0008270//zinc ion binding;GO:0006351//transcription, DNA-templated;GO:0005736//DNA-directed RNA polymerase I complex
CL10690.Contig2_All	4081	ko03020//RNA polymerase	Genetic Information Processing	Transcription	-1.06965	1.75644e-46	2.49014e-47	K03021//DNA-directed RNA polymerase III subunit RPC2 [EC:2.7.7.6]+ko03020//RNA polymerase;K03021//DNA-directed RNA polymerase III subunit RPC2 [EC:2.7.7.6]+ko03020//RNA polymerase	RNA polymerase Rpb2, domain 6	XM_001693876.1 Chlamydomonas reinhardtii DNA-directed RNA polymerase III, subunit 2 (CHLREDRAFT_129857), partial mRNA	DNA-directed RNA polymerase III subunit RPC2 [Nannochloropsis gaditana CCMP526] >EKU19986.1 DNA-directed RNA polymerase III subunit RPC2 [Nannochloropsis gaditana CCMP526] >EWM30232.1 dna-directed rna polymerase iii subunit rpc2 [Nannochloropsis gaditana]	[K] KOG0215 RNA polymerase III, second largest subunit	DNA-directed RNA polymerase III subunit 2 OS=Arabidopsis thaliana GN=NRPC2 PE=2 SV=1	GO:0003899//DNA-directed 5'-3' RNA polymerase activity;GO:0032549//ribonucleoside binding;GO:0003677//DNA binding;GO:0006351//transcription, DNA-templated
Unigene46139_All	802	ko03020//RNA polymerase	Genetic Information Processing	Transcription	-1.09306	7.14304e-23	1.65285e-23	K03006//DNA-directed RNA polymerase II subunit RPB1 [EC:2.7.7.6]+ko03020//RNA polymerase;K03006//DNA-directed RNA polymerase II subunit RPB1 [EC:2.7.7.6]+ko03020//RNA polymerase;K03006//DNA-directed RNA polymerase II subunit RPB1 [EC:2.7.7.6]+ko03020//RNA polymerase;K03006//DNA-directed RNA polymerase II subunit RPB1 [EC:2.7.7.6]+ko03020//RNA polymerase;K03006//DNA-directed RNA polymerase II subu…	RNA polymerase Rpb1, domain 1		dna-directed rna polymerase ii subunit rpb1 [Plasmopara halstedii]	[K] KOG0260 RNA polymerase II, large subunit	DNA-directed RNA polymerase II subunit 1 OS=Arabidopsis thaliana GN=NRPB1 PE=1 SV=3	GO:0003899//DNA-directed 5'-3' RNA polymerase activity;GO:0005665//DNA-directed RNA polymerase II, core complex;GO:0003677//DNA binding;GO:0006366//transcription from RNA polymerase II promoter
Unigene9776_All	1011	ko03020//RNA polymerase	Genetic Information Processing	Transcription	-1.09879	9.15466e-13	3.13137e-13	K02184//formin 2;K02184//formin 2;K03006//DNA-directed RNA polymerase II subunit RPB1 [EC:2.7.7.6]+ko03020//RNA polymerase			hypothetical protein CICLE_v10007309mg [Citrus clementina] >ESR64718.1 hypothetical protein CICLE_v10007309mg [Citrus clementina]		Vegetative cell wall protein gp1 OS=Chlamydomonas reinhardtii GN=GP1 PE=1 SV=1	GO:0005524//ATP binding;GO:0004672//protein kinase activity;GO:0016021//integral component of membrane
Unigene29890_All	1181	ko03020//RNA polymerase	Genetic Information Processing	Transcription	-1.10841	8.47192e-05	5.48198e-05	K03006//DNA-directed RNA polymerase II subunit RPB1 [EC:2.7.7.6]+ko03020//RNA polymerase	Integrase core domain		Os08g0248500 [Oryza sativa Japonica Group]	[R] KOG0017 FOG: Transposon-encoded proteins with TYA, reverse transcriptase, integrase domains in various combinations	Proline-rich receptor-like protein kinase PERK9 OS=Arabidopsis thaliana GN=PERK9 PE=1 SV=1
Unigene4452_All	2685	ko01100//Metabolic pathways;ko03020//RNA polymerase;ko00040//Pentose and glucuronate interconversions	Genetic Information Processing;Metabolism	Carbohydrate metabolism;Global and overview maps;Transcription	-1.1089	1.24929e-41	1.91136e-42	K03006//DNA-directed RNA polymerase II subunit RPB1 [EC:2.7.7.6]+ko03020//RNA polymerase;K02184//formin 2;K01051//pectinesterase [EC:3.1.1.11]+ko00040//Pentose and glucuronate interconversions+ko01100//Metabolic pathways;K04733//interleukin-1 receptor-associated kinase 4 [EC:2.7.11.1]	Myb-like DNA-binding domain		hypothetical protein FisN_31Hu011 [Fistulifera solaris]	[S] KOG4805 Uncharacterized conserved protein	Proline-rich receptor-like protein kinase PERK2 OS=Arabidopsis thaliana GN=PERK2 PE=2 SV=3
Unigene396_All	1385	ko03013//RNA transport;ko03020//RNA polymerase;ko04075//Plant hormone signal transduction	Genetic Information Processing;Environmental Information Processing	Translation;Transcription;Signal transduction	-1.11687	0.000173209	0.000117821	K17987//next to BRCA1 gene 1 protein;K03006//DNA-directed RNA polymerase II subunit RPB1 [EC:2.7.7.6]+ko03020//RNA polymerase;K14486//auxin response factor+ko04075//Plant hormone signal transduction;K15168//mediator of RNA polymerase II transcription subunit 25;K14306//nuclear pore complex protein Nup62+ko03013//RNA transport	Calcineurin-like phosphoesterase		hypothetical protein AV274_3234 [Blastocystis sp. ATCC 50177/Nand II]	[T] LSE0513 C 7-transmembrane receptor	Gamma-gliadin OS=Triticum aestivum PE=3 SV=1
Unigene44530_All	2403	ko03020//RNA polymerase	Genetic Information Processing	Transcription	-1.12041	1.37669e-38	2.22423e-39	K13806//sn1-specific diacylglycerol lipase [EC:3.1.1.-];K13806//sn1-specific diacylglycerol lipase [EC:3.1.1.-];K13806//sn1-specific diacylglycerol lipase [EC:3.1.1.-];K03006//DNA-directed RNA polymerase II subunit RPB1 [EC:2.7.7.6]+ko03020//RNA polymerase	FYVE zinc finger		hypothetical protein L914_01286 [Phytophthora parasitica]	[TU] KOG1818 Membrane trafficking and cell signaling protein HRS, contains VHS and FYVE domains
Unigene18577_All	844	ko03020//RNA polymerase	Genetic Information Processing	Transcription	-1.13628	2.29943e-13	7.64048e-14	K03006//DNA-directed RNA polymerase II subunit RPB1 [EC:2.7.7.6]+ko03020//RNA polymerase;K16628//collagen, type VII, alpha;K03006//DNA-directed RNA polymerase II subunit RPB1 [EC:2.7.7.6]+ko03020//RNA polymerase	Tryptophan-associated transmembrane protein (Trp_oprn_chp)	CP023116.1 Lupinus angustiflorus cultivar Tanjil chromosome LG-04	PREDICTED: proline-rich receptor-like protein kinase PERK1 [Gossypium raimondii] >XP_012467561.1 PREDICTED: proline-rich receptor-like protein kinase PERK1 [Gossypium raimondii] >KJB07173.1 hypothetical protein B456_001G005700 [Gossypium raimondii]	[R] LSE0026 A Ripening-related protein	Pectinesterase inhibitor 10 OS=Arabidopsis thaliana GN=PMEI10 PE=2 SV=1	GO:0004674//protein serine/threonine kinase activity;GO:0005524//ATP binding;GO:0016021//integral component of membrane
CL2592.Contig4_All	2767	ko03020//RNA polymerase;ko01100//Metabolic pathways;ko00760//Nicotinate and nicotinamide metabolism	Metabolism;Genetic Information Processing	Transcription;Metabolism of cofactors and vitamins;Global and overview maps	-1.15632	2.78455e-19	7.24074e-20	K17545//serine/threonine-protein kinase ULK4 [EC:2.7.11.1];K03517//quinolinate synthase [EC:2.5.1.72]+ko01100//Metabolic pathways+ko00760//Nicotinate and nicotinamide metabolism;K03006//DNA-directed RNA polymerase II subunit RPB1 [EC:2.7.7.6]+ko03020//RNA polymerase;K02350//DNA polymerase zeta [EC:2.7.7.7];K01147//exoribonuclease II [EC:3.1.13.1]	Reverse transcriptase (RNA-dependent DNA polymerase)		hypothetical protein VITISV_017741 [Vitis vinifera]	[R] KOG0017 FOG: Transposon-encoded proteins with TYA, reverse transcriptase, integrase domains in various combinations	Uncharacterized mitochondrial protein AtMg00820 OS=Arabidopsis thaliana GN=AtMg00820 PE=4 SV=1
CL2592.Contig1_All	2239	ko03020//RNA polymerase	Genetic Information Processing	Transcription	-1.20159	7.8374e-15	2.43363e-15	K03006//DNA-directed RNA polymerase II subunit RPB1 [EC:2.7.7.6]+ko03020//RNA polymerase;K04733//interleukin-1 receptor-associated kinase 4 [EC:2.7.11.1];K18749//protein LSM14	GAG-pre-integrase domain		Retrovirus-related Pol polyprotein from transposon TNT 1-94 [Cajanus cajan]	[R] KOG0017 FOG: Transposon-encoded proteins with TYA, reverse transcriptase, integrase domains in various combinations	Nuclear pore complex protein NUP62 OS=Arabidopsis thaliana GN=NUP62 PE=1 SV=1
CL1044.Contig2_All	10704	ko00040//Pentose and glucuronate interconversions;ko03013//RNA transport;ko03040//Spliceosome;ko03020//RNA polymerase;ko01100//Metabolic pathways;ko00940//Phenylpropanoid biosynthesis;ko03015//mRNA surveillance pathway;ko01110//Biosynthesis of secondary metabolites	Metabolism;Genetic Information Processing	Carbohydrate metabolism;Biosynthesis of other secondary metabolites;Global and overview maps;Transcription;Translation	-1.20377	1.90576e-241	7.90353e-243	K03006//DNA-directed RNA polymerase II subunit RPB1 [EC:2.7.7.6]+ko03020//RNA polymerase;K00430//peroxidase [EC:1.11.1.7]+ko01100//Metabolic pathways+ko01110//Biosynthesis of secondary metabolites+ko00940//Phenylpropanoid biosynthesis;K01051//pectinesterase [EC:3.1.1.11]+ko00040//Pentose and glucuronate interconversions+ko01100//Metabolic pathways;K12875//apoptotic chromatin condensation inducer …	G8 domain		hypothetical protein GPECTOR_32g493 [Gonium pectorale]	[WV] KOG1216 von Willebrand factor and related coagulation proteins	Protein TIC 214 OS=Cucumis sativus GN=TIC214 PE=3 SV=2
CL7548.Contig1_All	1092	ko01100//Metabolic pathways;ko00040//Pentose and glucuronate interconversions;ko03020//RNA polymerase;ko00910//Nitrogen metabolism;ko00052//Galactose metabolism;ko00520//Amino sugar and nucleotide sugar metabolism;ko00630//Glyoxylate and dicarboxylate metabolism;ko00053//Ascorbate and aldarate metabolism	Genetic Information Processing;Metabolism	Carbohydrate metabolism;Energy metabolism;Transcription;Global and overview maps	-1.21498	9.59447e-05	6.27493e-05	K00284//glutamate synthase (ferredoxin) [EC:1.4.7.1]+ko00910//Nitrogen metabolism+ko00630//Glyoxylate and dicarboxylate metabolism;K04733//interleukin-1 receptor-associated kinase 4 [EC:2.7.11.1];K12447//UDP-sugar pyrophosphorylase [EC:2.7.7.64]+ko00520//Amino sugar and nucleotide sugar metabolism+ko00040//Pentose and glucuronate interconversions+ko01100//Metabolic pathways+ko00052//Galactose met…	Reverse transcriptase (RNA-dependent DNA polymerase)		putative ribonuclease H-like domain-containing protein [Helianthus annuus]	[R] KOG0017 FOG: Transposon-encoded proteins with TYA, reverse transcriptase, integrase domains in various combinations
Unigene15036_All	3156	ko03020//RNA polymerase	Genetic Information Processing	Transcription	-1.21661	2.36994e-182	1.22595e-183	K02184//formin 2;K03006//DNA-directed RNA polymerase II subunit RPB1 [EC:2.7.7.6]+ko03020//RNA polymerase;K19984//exocyst complex component 5;K02184//formin 2	Fungal Zn(2)-Cys(6) binuclear cluster domain		formin-like protein 18 [Aegilops tauschii subsp. tauschii]	[M] LSE0601 A Pollen extensin-like protein (Pex)	Leucine-rich repeat extensin-like protein 5 OS=Arabidopsis thaliana GN=LRX5 PE=2 SV=2
Unigene4714_All	1405	ko03010//Ribosome;ko03020//RNA polymerase	Genetic Information Processing	Translation;Transcription	-1.22372	2.15759e-13	7.16005e-14	K02948//small subunit ribosomal protein S11+ko03010//Ribosome;K03046//DNA-directed RNA polymerase subunit beta' [EC:2.7.7.6]+ko03020//RNA polymerase		KT305105.1 Trachelomonas sp. Jilnal030207BT small subunit ribosomal RNA gene, partial sequence; chloroplast	hypothetical protein (mitochondrion) [Vicia faba]
CL43.Contig1_All	1735	ko03020//RNA polymerase;ko03013//RNA transport	Genetic Information Processing	Transcription;Translation	-1.26862	1.91288e-08	8.57862e-09	K14306//nuclear pore complex protein Nup62+ko03013//RNA transport;K03006//DNA-directed RNA polymerase II subunit RPB1 [EC:2.7.7.6]+ko03020//RNA polymerase;K14306//nuclear pore complex protein Nup62+ko03013//RNA transport	Reverse transcriptase (RNA-dependent DNA polymerase)		132 kDa protein [Symbiodinium microadriaticum]
Unigene76533_All	798	ko03020//RNA polymerase	Genetic Information Processing	Transcription	-1.27412	0.000407143	0.000293193	K22686//pro-apoptotic serine protease NMA111 [EC:3.4.21.-];K03006//DNA-directed RNA polymerase II subunit RPB1 [EC:2.7.7.6]+ko03020//RNA polymerase;K17545//serine/threonine-protein kinase ULK4 [EC:2.7.11.1];K04733//interleukin-1 receptor-associated kinase 4 [EC:2.7.11.1]	Reverse transcriptase (RNA-dependent DNA polymerase)		Retrovirus-related Pol polyprotein from transposon TNT 1-94 [Cajanus cajan]	[R] KOG0017 FOG: Transposon-encoded proteins with TYA, reverse transcriptase, integrase domains in various combinations	Retrovirus-related Pol polyprotein from transposon TNT 1-94 OS=Nicotiana tabacum PE=2 SV=1
Unigene11201_All	5458	ko00052//Galactose metabolism;ko03020//RNA polymerase;ko00053//Ascorbate and aldarate metabolism;ko00520//Amino sugar and nucleotide sugar metabolism;ko00040//Pentose and glucuronate interconversions;ko01100//Metabolic pathways	Genetic Information Processing;Metabolism	Global and overview maps;Transcription;Carbohydrate metabolism	-1.29302	4.13984e-141	2.64857e-142	K17545//serine/threonine-protein kinase ULK4 [EC:2.7.11.1];K12447//UDP-sugar pyrophosphorylase [EC:2.7.7.64]+ko00520//Amino sugar and nucleotide sugar metabolism+ko00040//Pentose and glucuronate interconversions+ko01100//Metabolic pathways+ko00052//Galactose metabolism+ko00053//Ascorbate and aldarate metabolism;K03006//DNA-directed RNA polymerase II subunit RPB1 [EC:2.7.7.6]+ko03020//RNA polymera…	Reverse transcriptase (RNA-dependent DNA polymerase)	AP015042.1 Vigna angularis var. angularis DNA, chromosome 9, almost complete sequence, cultivar: Shumari	hypothetical protein VITISV_035665 [Vitis vinifera]	[R] KOG0017 FOG: Transposon-encoded proteins with TYA, reverse transcriptase, integrase domains in various combinations	HVA22-like protein e OS=Arabidopsis thaliana GN=HVA22E PE=2 SV=1
Unigene810_All	1589	ko03020//RNA polymerase	Genetic Information Processing	Transcription	-1.33662	9.55059e-51	1.26988e-51	K02184//formin 2;K10990//RecQ-mediated genome instability protein 1;K02184//formin 2;K03006//DNA-directed RNA polymerase II subunit RPB1 [EC:2.7.7.6]+ko03020//RNA polymerase	Domain of unknown function (DUF4718)		hypothetical protein H257_08193 [Aphanomyces astaci] >ETV77964.1 hypothetical protein H257_08193 [Aphanomyces astaci]	[C] KOG0559 Dihydrolipoamide succinyltransferase (2-oxoglutarate dehydrogenase, E2 subunit)	Chitin-binding lectin 1 OS=Solanum tuberosum PE=1 SV=2
CL4918.Contig4_All	4838	ko00053//Ascorbate and aldarate metabolism;ko00520//Amino sugar and nucleotide sugar metabolism;ko00040//Pentose and glucuronate interconversions;ko03020//RNA polymerase;ko01100//Metabolic pathways;ko00052//Galactose metabolism;ko04144//Endocytosis	Genetic Information Processing;Metabolism;Cellular Processes	Transcription;Transport and catabolism;Global and overview maps;Carbohydrate metabolism	-1.35747	6.11208e-32	1.13672e-32	K03006//DNA-directed RNA polymerase II subunit RPB1 [EC:2.7.7.6]+ko03020//RNA polymerase;K01528//dynamin GTPase [EC:3.6.5.5]+ko04144//Endocytosis;K17545//serine/threonine-protein kinase ULK4 [EC:2.7.11.1];K22686//pro-apoptotic serine protease NMA111 [EC:3.4.21.-];K12447//UDP-sugar pyrophosphorylase [EC:2.7.7.64]+ko00520//Amino sugar and nucleotide sugar metabolism+ko00040//Pentose and glucuronate…	Reverse transcriptase (RNA-dependent DNA polymerase)		Putative gag-pol polyprotein, identical [Solanum demissum]	[R] KOG0017 FOG: Transposon-encoded proteins with TYA, reverse transcriptase, integrase domains in various combinations	Uncharacterized mitochondrial protein AtMg00810 OS=Arabidopsis thaliana GN=AtMg00810 PE=4 SV=1
Unigene46057_All	2266	ko03020//RNA polymerase	Genetic Information Processing	Transcription	-1.358	4.82791e-22	1.14569e-22	K22020//mucin-19;K03006//DNA-directed RNA polymerase II subunit RPB1 [EC:2.7.7.6]+ko03020//RNA polymerase;K06620//transcription factor E2F3;K03006//DNA-directed RNA polymerase II subunit RPB1 [EC:2.7.7.6]+ko03020//RNA polymerase			predicted protein [Thalassiosira pseudonana CCMP1335] >EED94527.1 predicted protein [Thalassiosira pseudonana CCMP1335]	[K] KOG2341 TATA box binding protein (TBP)-associated factor, RNA polymerase II
CL3080.Contig4_All	6498	ko03020//RNA polymerase	Genetic Information Processing	Transcription	-1.36844	2.04909e-52	2.66107e-53	K03006//DNA-directed RNA polymerase II subunit RPB1 [EC:2.7.7.6]+ko03020//RNA polymerase;K03006//DNA-directed RNA polymerase II subunit RPB1 [EC:2.7.7.6]+ko03020//RNA polymerase;K03006//DNA-directed RNA polymerase II subunit RPB1 [EC:2.7.7.6]+ko03020//RNA polymerase;K03006//DNA-directed RNA polymerase II subunit RPB1 [EC:2.7.7.6]+ko03020//RNA polymerase;K03006//DNA-directed RNA polymerase II subu…	Paired-box protein 2 C terminal	EU943390.1 Zea mays clone 1617465 mRNA sequence	DNA-directed RNA polymerase [Zostera marina]	[K] KOG0260 RNA polymerase II, large subunit	DNA-directed RNA polymerase II subunit 1 OS=Arabidopsis thaliana GN=NRPB1 PE=1 SV=3	GO:0003899//DNA-directed 5'-3' RNA polymerase activity;GO:0005665//DNA-directed RNA polymerase II, core complex;GO:0003677//DNA binding;GO:0006366//transcription from RNA polymerase II promoter
CL361.Contig2_All	2381	ko03020//RNA polymerase	Genetic Information Processing	Transcription	-1.38766	1.5736e-07	7.60334e-08	K13806//sn1-specific diacylglycerol lipase [EC:3.1.1.-];K13806//sn1-specific diacylglycerol lipase [EC:3.1.1.-];K13806//sn1-specific diacylglycerol lipase [EC:3.1.1.-];K03006//DNA-directed RNA polymerase II subunit RPB1 [EC:2.7.7.6]+ko03020//RNA polymerase	Lipase (class 3)		Zinc finger FYVE domain-containing protein [Ectocarpus siliculosus]	[W] KOG3544 Collagens (type IV and type XIII), and related proteins		GO:0046872//metal ion binding;GO:0016787//hydrolase activity;GO:0006629//lipid metabolic process
CL1044.Contig3_All	10676	ko03015//mRNA surveillance pathway;ko03020//RNA polymerase;ko00940//Phenylpropanoid biosynthesis;ko01110//Biosynthesis of secondary metabolites;ko01100//Metabolic pathways;ko03013//RNA transport;ko03040//Spliceosome	Genetic Information Processing;Metabolism	Translation;Biosynthesis of other secondary metabolites;Global and overview maps;Transcription	-1.44998	1.57993e-150	9.59006e-152	K03006//DNA-directed RNA polymerase II subunit RPB1 [EC:2.7.7.6]+ko03020//RNA polymerase;K00430//peroxidase [EC:1.11.1.7]+ko01100//Metabolic pathways+ko01110//Biosynthesis of secondary metabolites+ko00940//Phenylpropanoid biosynthesis;K12875//apoptotic chromatin condensation inducer in the nucleus+ko03040//Spliceosome+ko03015//mRNA surveillance pathway+ko03013//RNA transport	IPT/TIG domain		hypothetical protein GPECTOR_77g37 [Gonium pectorale]	[WV] KOG1216 von Willebrand factor and related coagulation proteins	Lysine-rich arabinogalactan protein 18 OS=Arabidopsis thaliana GN=AGP18 PE=2 SV=1
CL768.Contig4_All	840	ko03020//RNA polymerase	Genetic Information Processing	Transcription	-1.46256	2.85509e-06	1.5526e-06	K03006//DNA-directed RNA polymerase II subunit RPB1 [EC:2.7.7.6]+ko03020//RNA polymerase;K03006//DNA-directed RNA polymerase II subunit RPB1 [EC:2.7.7.6]+ko03020//RNA polymerase;K03006//DNA-directed RNA polymerase II subunit RPB1 [EC:2.7.7.6]+ko03020//RNA polymerase			LOW QUALITY PROTEIN: DNA-directed RNA polymerase II subunit 1-like [Sesamum indicum]
Unigene885_All	615	ko01100//Metabolic pathways;ko03020//RNA polymerase;ko00940//Phenylpropanoid biosynthesis;ko04144//Endocytosis;ko01110//Biosynthesis of secondary metabolites	Genetic Information Processing;Cellular Processes;Metabolism	Biosynthesis of other secondary metabolites;Global and overview maps;Transcription;Transport and catabolism	-1.46736	5.89285e-05	3.73869e-05	K00430//peroxidase [EC:1.11.1.7]+ko01100//Metabolic pathways+ko01110//Biosynthesis of secondary metabolites+ko00940//Phenylpropanoid biosynthesis;K03006//DNA-directed RNA polymerase II subunit RPB1 [EC:2.7.7.6]+ko03020//RNA polymerase;K05747//Wiskott-Aldrich syndrome protein+ko04144//Endocytosis			hypothetical protein POPTR_0018s08800g [Populus trichocarpa] >ERP49850.1 hypothetical protein POPTR_0018s08800g [Populus trichocarpa]	[T] KOG1187 Serine/threonine protein kinase	Proline-rich receptor-like protein kinase PERK2 OS=Arabidopsis thaliana GN=PERK2 PE=2 SV=3	GO:0005199//structural constituent of cell wall;GO:0005524//ATP binding;GO:0006468//protein phosphorylation;GO:0016021//integral component of membrane;GO:0007166//cell surface receptor signaling pathway;GO:0004675//transmembrane receptor protein serine/threonine kinase activity;GO:0005886//plasma membrane
CL1426.Contig2_All	2087	ko03020//RNA polymerase	Genetic Information Processing	Transcription	-1.48743	7.65298e-06	4.36239e-06	K03040//DNA-directed RNA polymerase subunit alpha [EC:2.7.7.6]+ko03020//RNA polymerase;K03040//DNA-directed RNA polymerase subunit alpha [EC:2.7.7.6]+ko03020//RNA polymerase;K03040//DNA-directed RNA polymerase subunit alpha [EC:2.7.7.6]+ko03020//RNA polymerase;K03040//DNA-directed RNA polymerase subunit alpha [EC:2.7.7.6]+ko03020//RNA polymerase;K03040//DNA-directed RNA polymerase subunit alpha […	Ribosomal protein S11		[pt] DNA-directed RNA polymerase subunit alpha [Galdieria sulphuraria] >EME28488.1 [pt] DNA-directed RNA polymerase subunit alpha [Galdieria sulphuraria]	[J] KOG0408 Mitochondrial/chloroplast ribosomal protein S11	DNA-directed RNA polymerase subunit alpha OS=Pyrenomonas salina GN=rpoA PE=3 SV=1	GO:0005840//ribosome;GO:0003723//RNA binding;GO:0003677//DNA binding;GO:0006351//transcription, DNA-templated;GO:0046983//protein dimerization activity;GO:0003899//DNA-directed 5'-3' RNA polymerase activity;GO:0006412//translation;GO:0009536//plastid;GO:0003735//structural constituent of ribosome
Unigene7029_All	1070	ko03020//RNA polymerase	Genetic Information Processing	Transcription	-1.53614	2.16668e-05	1.30474e-05	K03046//DNA-directed RNA polymerase subunit beta' [EC:2.7.7.6]+ko03020//RNA polymerase		EU600086.1 Pueraria montana var. lobata 16S ribosomal RNA gene, partial sequence	hypothetical protein M569_00222, partial [Genlisea aurea]
Unigene15505_All	1049	ko03020//RNA polymerase	Genetic Information Processing	Transcription	-1.55646	1.40892e-33	2.52821e-34	K03046//DNA-directed RNA polymerase subunit beta' [EC:2.7.7.6]+ko03020//RNA polymerase		KX284728.2 Rhodochaete parvula plastid, complete genome	BnaC09g29270D [Brassica napus]
Unigene34864_All	1804	ko03020//RNA polymerase	Genetic Information Processing	Transcription	-1.59002	3.3787e-112	2.5306e-113	K03006//DNA-directed RNA polymerase II subunit RPB1 [EC:2.7.7.6]+ko03020//RNA polymerase			flocculation protein FLO11-like [Spinacia oleracea]
CL1412.Contig2_All	14537	ko03020//RNA polymerase	Genetic Information Processing	Transcription	-1.59125	0	0	K03046//DNA-directed RNA polymerase subunit beta' [EC:2.7.7.6]+ko03020//RNA polymerase;K03046//DNA-directed RNA polymerase subunit beta' [EC:2.7.7.6]+ko03020//RNA polymerase;K03046//DNA-directed RNA polymerase subunit beta' [EC:2.7.7.6]+ko03020//RNA polymerase;K03046//DNA-directed RNA polymerase subunit beta' [EC:2.7.7.6]+ko03020//RNA polymerase;K02358//elongation factor Tu	RNA polymerase Rpb2, domain 6	KT716756.1 Pyropia endiviifolia plastid, complete genome	RNA polymerase beta' chain [Rhodomonas salina] >A6MVX3.1 RecName: Full=DNA-directed RNA polymerase subunit beta'; AltName: Full=PEP; AltName: Full=Plastid-encoded RNA polymerase subunit beta'; Short=RNA polymerase subunit beta' >ABO70812.1 RNA polymerase beta' chain (chloroplast) [Rhodomonas salina]	[J] KOG0460 Mitochondrial translation elongation factor Tu	DNA-directed RNA polymerase subunit beta' OS=Guillardia theta GN=rpoC1 PE=3 SV=1	GO:0005840//ribosome;GO:0003723//RNA binding;GO:0032549//ribonucleoside binding;GO:0003677//DNA binding;GO:0006351//transcription, DNA-templated;GO:0003899//DNA-directed 5'-3' RNA polymerase activity;GO:0006412//translation;GO:0009536//plastid;GO:0003735//structural constituent of ribosome;GO:0009507//chloroplast
Unigene11203_All	779	ko04144//Endocytosis;ko03020//RNA polymerase	Genetic Information Processing;Cellular Processes	Transcription;Transport and catabolism	-1.59783	0.000164341	0.000110886	K17545//serine/threonine-protein kinase ULK4 [EC:2.7.11.1];K02350//DNA polymerase zeta [EC:2.7.7.7];K01528//dynamin GTPase [EC:3.6.5.5]+ko04144//Endocytosis;K03006//DNA-directed RNA polymerase II subunit RPB1 [EC:2.7.7.6]+ko03020//RNA polymerase	Reverse transcriptase (RNA-dependent DNA polymerase)		Putative retroelement [Oryza sativa Japonica Group]	[R] KOG0017 FOG: Transposon-encoded proteins with TYA, reverse transcriptase, integrase domains in various combinations	Uncharacterized mitochondrial protein AtMg00820 OS=Arabidopsis thaliana GN=AtMg00820 PE=4 SV=1
CL7309.Contig2_All	2433	ko01100//Metabolic pathways;ko01230//Biosynthesis of amino acids;ko01210//2-Oxocarboxylic acid metabolism;ko00630//Glyoxylate and dicarboxylate metabolism;ko01110//Biosynthesis of secondary metabolites;ko03020//RNA polymerase;ko00020//Citrate cycle (TCA cycle);ko01200//Carbon metabolism	Genetic Information Processing;Metabolism	Carbohydrate metabolism;Transcription;Global and overview maps	-1.62686	0	0	K01681//aconitate hydratase [EC:4.2.1.3]+ko00020//Citrate cycle (TCA cycle)+ko01230//Biosynthesis of amino acids+ko01100//Metabolic pathways+ko01110//Biosynthesis of secondary metabolites+ko01210//2-Oxocarboxylic acid metabolism+ko01200//Carbon metabolism+ko00630//Glyoxylate and dicarboxylate metabolism;K01681//aconitate hydratase [EC:4.2.1.3]+ko00020//Citrate cycle (TCA cycle)+ko01230//Biosynthe…	Monomeric isocitrate dehydrogenase	XM_009040915.1 Aureococcus anophagefferens hypothetical protein partial mRNA	isocitrate dehydrogenase, NADP-dependent [Fragilariopsis cylindrus CCMP1102]	[WV] KOG1216 von Willebrand factor and related coagulation proteins	Formin-like protein 16 OS=Oryza sativa subsp. japonica GN=FH16 PE=2 SV=1	GO:0006099//tricarboxylic acid cycle;GO:0004450//isocitrate dehydrogenase (NADP+) activity
Unigene15543_All	2618	ko03020//RNA polymerase	Genetic Information Processing	Transcription	-1.62752	7.84236e-30	1.52208e-30	K22686//pro-apoptotic serine protease NMA111 [EC:3.4.21.-];K11593//eukaryotic translation initiation factor 2C;K03006//DNA-directed RNA polymerase II subunit RPB1 [EC:2.7.7.6]+ko03020//RNA polymerase;K04733//interleukin-1 receptor-associated kinase 4 [EC:2.7.11.1];K15601//lysine-specific demethylase 3 [EC:1.14.11.-]	Integrase core domain		putative gag-pol polyprotein [Oryza sativa Japonica Group] >AAP55058.1 retrotransposon protein, putative, Ty1-copia subclass [Oryza sativa Japonica Group]	[R] KOG0017 FOG: Transposon-encoded proteins with TYA, reverse transcriptase, integrase domains in various combinations	Retrovirus-related Pol polyprotein from transposon TNT 1-94 OS=Nicotiana tabacum PE=2 SV=1
Unigene9632_All	1637	ko03020//RNA polymerase;ko03010//Ribosome	Genetic Information Processing	Transcription;Translation	-1.66657	6.22477e-07	3.17658e-07	K02948//small subunit ribosomal protein S11+ko03010//Ribosome;K03046//DNA-directed RNA polymerase subunit beta' [EC:2.7.7.6]+ko03020//RNA polymerase		KT305105.1 Trachelomonas sp. Jilnal030207BT small subunit ribosomal RNA gene, partial sequence; chloroplast	PREDICTED: uncharacterized protein LOC109230515 [Nicotiana attenuata]
Unigene26369_All	718	ko00940//Phenylpropanoid biosynthesis;ko00040//Pentose and glucuronate interconversions;ko03020//RNA polymerase;ko01110//Biosynthesis of secondary metabolites;ko04141//Protein processing in endoplasmic reticulum;ko01100//Metabolic pathways	Metabolism;Genetic Information Processing	Folding, sorting and degradation;Biosynthesis of other secondary metabolites;Global and overview maps;Carbohydrate metabolism;Transcription	-1.67382	5.86409e-08	2.73293e-08	K01051//pectinesterase [EC:3.1.1.11]+ko00040//Pentose and glucuronate interconversions+ko01100//Metabolic pathways;K03006//DNA-directed RNA polymerase II subunit RPB1 [EC:2.7.7.6]+ko03020//RNA polymerase;K00430//peroxidase [EC:1.11.1.7]+ko01100//Metabolic pathways+ko01110//Biosynthesis of secondary metabolites+ko00940//Phenylpropanoid biosynthesis;K14007//protein transport protein SEC24+ko04141//…			hypothetical protein Esi_0009_0176 [Ectocarpus siliculosus]	[W] KOG3544 Collagens (type IV and type XIII), and related proteins	Oleosin-B6 OS=Brassica napus GN=OlnB6 PE=1 SV=3
CL1044.Contig1_All	2896	ko03013//RNA transport;ko00940//Phenylpropanoid biosynthesis;ko03015//mRNA surveillance pathway;ko03040//Spliceosome;ko01100//Metabolic pathways;ko01110//Biosynthesis of secondary metabolites;ko03020//RNA polymerase	Genetic Information Processing;Metabolism	Global and overview maps;Biosynthesis of other secondary metabolites;Transcription;Translation	-1.67797	2.04101e-15	6.18454e-16	K03006//DNA-directed RNA polymerase II subunit RPB1 [EC:2.7.7.6]+ko03020//RNA polymerase;K00430//peroxidase [EC:1.11.1.7]+ko01100//Metabolic pathways+ko01110//Biosynthesis of secondary metabolites+ko00940//Phenylpropanoid biosynthesis;K12875//apoptotic chromatin condensation inducer in the nucleus+ko03040//Spliceosome+ko03015//mRNA surveillance pathway+ko03013//RNA transport	PT repeat		hypothetical protein FRACYDRAFT_232027 [Fragilariopsis cylindrus CCMP1102]	[RT] LSE0147 C Chemoreceptor/7TM receptor	Lysine-rich arabinogalactan protein 18 OS=Arabidopsis thaliana GN=AGP18 PE=2 SV=1	GO:0016539//intein-mediated protein splicing;GO:0008233//peptidase activity;GO:0016021//integral component of membrane
Unigene10194_All	6678	ko00195//Photosynthesis;ko03020//RNA polymerase;ko00190//Oxidative phosphorylation;ko03010//Ribosome;ko01100//Metabolic pathways	Metabolism;Genetic Information Processing	Energy metabolism;Translation;Transcription;Global and overview maps	-1.72625	1.96548e-105	1.54644e-106	K02108//F-type H+-transporting ATPase subunit a+ko01100//Metabolic pathways+ko00190//Oxidative phosphorylation+ko00195//Photosynthesis;K03046//DNA-directed RNA polymerase subunit beta' [EC:2.7.7.6]+ko03020//RNA polymerase;K02948//small subunit ribosomal protein S11+ko03010//Ribosome;K01358//ATP-dependent Clp protease, protease subunit [EC:3.4.21.92]	SIS domain	KT305105.1 Trachelomonas sp. Jilnal030207BT small subunit ribosomal RNA gene, partial sequence; chloroplast	cell wall-associated hydrolase [Phaseolus vulgaris]		Uncharacterized protein ORF91 OS=Phalaenopsis aphrodite subsp. formosana PE=4 SV=1
Unigene24094_All	953	ko03020//RNA polymerase	Genetic Information Processing	Transcription	-1.80699	4.83249e-05	3.02834e-05	K03006//DNA-directed RNA polymerase II subunit RPB1 [EC:2.7.7.6]+ko03020//RNA polymerase;K03006//DNA-directed RNA polymerase II subunit RPB1 [EC:2.7.7.6]+ko03020//RNA polymerase;K03006//DNA-directed RNA polymerase II subunit RPB1 [EC:2.7.7.6]+ko03020//RNA polymerase;K03006//DNA-directed RNA polymerase II subunit RPB1 [EC:2.7.7.6]+ko03020//RNA polymerase	Putative ephrin-receptor like		conserved unknown protein [Ectocarpus siliculosus]	[R] LSE0121 A AAI domain	Classical arabinogalactan protein 9 OS=Arabidopsis thaliana GN=AGP9 PE=1 SV=2	GO:0008061//chitin binding;GO:0006030//chitin metabolic process;GO:0016021//integral component of membrane;GO:0005576//extracellular region
Unigene19396_All	1217	ko03020//RNA polymerase	Genetic Information Processing	Transcription	-1.82404	1.30873e-76	1.29082e-77	K03006//DNA-directed RNA polymerase II subunit RPB1 [EC:2.7.7.6]+ko03020//RNA polymerase			hypothetical protein BAE44_0006864 [Dichanthelium oligosanthes]
Unigene28989_All	658	ko01100//Metabolic pathways;ko03020//RNA polymerase;ko01110//Biosynthesis of secondary metabolites;ko00940//Phenylpropanoid biosynthesis	Genetic Information Processing;Metabolism	Transcription;Global and overview maps;Biosynthesis of other secondary metabolites	-1.86448	0.000240262	0.000166741	K02184//formin 2;K00430//peroxidase [EC:1.11.1.7]+ko01100//Metabolic pathways+ko01110//Biosynthesis of secondary metabolites+ko00940//Phenylpropanoid biosynthesis;K03006//DNA-directed RNA polymerase II subunit RPB1 [EC:2.7.7.6]+ko03020//RNA polymerase;K16743//abnormal spindle-like microcephaly-associated protein;K00430//peroxidase [EC:1.11.1.7]+ko01100//Metabolic pathways+ko01110//Biosynthesis of…	IQ calmodulin-binding motif		hypothetical protein EMIHUDRAFT_433316 [Emiliania huxleyi CCMP1516] >EOD41329.1 hypothetical protein EMIHUDRAFT_433316 [Emiliania huxleyi CCMP1516]	[W] KOG3544 Collagens (type IV and type XIII), and related proteins	Formin-like protein 7 OS=Arabidopsis thaliana GN=FH7 PE=2 SV=1	GO:0008237//metallopeptidase activity;GO:0005509//calcium ion binding;GO:0016021//integral component of membrane
CL3700.Contig2_All	2140	ko03013//RNA transport;ko03015//mRNA surveillance pathway;ko03020//RNA polymerase	Genetic Information Processing	Transcription;Translation	-1.90189	5.35161e-67	5.84021e-68	K02184//formin 2;K03006//DNA-directed RNA polymerase II subunit RPB1 [EC:2.7.7.6]+ko03020//RNA polymerase;K13171//serine/arginine repetitive matrix protein 1+ko03015//mRNA surveillance pathway+ko03013//RNA transport;K04733//interleukin-1 receptor-associated kinase 4 [EC:2.7.11.1]	Common central domain of tyrosinase	XM_009042245.1 Aureococcus anophagefferens hypothetical protein partial mRNA	hypothetical protein AURANDRAFT_64088 [Aureococcus anophagefferens] >EGB08443.1 hypothetical protein AURANDRAFT_64088 [Aureococcus anophagefferens]	[Z] KOG4462 WASP-interacting protein VRP1/WIP, contains WH2 domain	Formin-like protein 18 OS=Oryza sativa subsp. japonica GN=FH18 PE=2 SV=1	GO:0046872//metal ion binding;GO:0016787//hydrolase activity;GO:0016491//oxidoreductase activity
CL1723.Contig8_All	2467	ko03015//mRNA surveillance pathway;ko03013//RNA transport;ko03040//Spliceosome;ko03020//RNA polymerase	Genetic Information Processing	Translation;Transcription	-1.90322	0	0	K10955//mucin-2;K12875//apoptotic chromatin condensation inducer in the nucleus+ko03040//Spliceosome+ko03015//mRNA surveillance pathway+ko03013//RNA transport;K10990//RecQ-mediated genome instability protein 1;K03006//DNA-directed RNA polymerase II subunit RPB1 [EC:2.7.7.6]+ko03020//RNA polymerase	Peroxidase	DQ388028.1 Aucoumea klaineana clone ak21 microsatellite sequence	hypothetical protein Naga_100543g1 [Nannochloropsis gaditana]	[WV] KOG1216 von Willebrand factor and related coagulation proteins	Classical arabinogalactan protein 10 OS=Arabidopsis thaliana GN=AGP10 PE=1 SV=1	GO:0016539//intein-mediated protein splicing;GO:0008233//peptidase activity;GO:0016021//integral component of membrane
Unigene31588_All	930	ko03013//RNA transport;ko03020//RNA polymerase	Genetic Information Processing	Transcription;Translation	-1.90887	5.59769e-10	2.25718e-10	K03006//DNA-directed RNA polymerase II subunit RPB1 [EC:2.7.7.6]+ko03020//RNA polymerase;K14297//nuclear pore complex protein Nup98-Nup96+ko03013//RNA transport	Protein of unknown function (DUF2457)		hypothetical protein BU14_0209s0023 [Porphyra umbilicalis]
Unigene31637_All	915	ko03020//RNA polymerase	Genetic Information Processing	Transcription	-1.90887	8.3717e-08	3.95227e-08	K03006//DNA-directed RNA polymerase II subunit RPB1 [EC:2.7.7.6]+ko03020//RNA polymerase	Domain of unknown function (DUF3554)		pollen coat oleosin-glycine rich protein [Olimarabidopsis pumila]
Unigene15097_All	4723	ko03020//RNA polymerase;ko03013//RNA transport;ko03015//mRNA surveillance pathway	Genetic Information Processing	Transcription;Translation	-1.91512	2.32699e-236	9.79087e-238	K03006//DNA-directed RNA polymerase II subunit RPB1 [EC:2.7.7.6]+ko03020//RNA polymerase;K13171//serine/arginine repetitive matrix protein 1+ko03015//mRNA surveillance pathway+ko03013//RNA transport;K01147//exoribonuclease II [EC:3.1.13.1];K03515//DNA repair protein REV1 [EC:2.7.7.-];K04733//interleukin-1 receptor-associated kinase 4 [EC:2.7.11.1]	Integrase core domain	AB182314.1 Heterosigma akashiwo DNA, fragment RA7577Hy800.1	putative retroelement pol polyprotein [Arabidopsis thaliana]	[R] KOG0017 FOG: Transposon-encoded proteins with TYA, reverse transcriptase, integrase domains in various combinations	Retrovirus-related Pol polyprotein from transposon TNT 1-94 OS=Nicotiana tabacum PE=2 SV=1	GO:0015074//DNA integration;GO:0008270//zinc ion binding;GO:0003676//nucleic acid binding
Unigene47508_All	660	ko00630//Glyoxylate and dicarboxylate metabolism;ko00910//Nitrogen metabolism;ko03020//RNA polymerase;ko01100//Metabolic pathways;ko00760//Nicotinate and nicotinamide metabolism	Genetic Information Processing;Metabolism	Energy metabolism;Metabolism of cofactors and vitamins;Transcription;Global and overview maps;Carbohydrate metabolism	-1.95194	9.62065e-05	6.29409e-05	K03006//DNA-directed RNA polymerase II subunit RPB1 [EC:2.7.7.6]+ko03020//RNA polymerase;K00284//glutamate synthase (ferredoxin) [EC:1.4.7.1]+ko00910//Nitrogen metabolism+ko00630//Glyoxylate and dicarboxylate metabolism;K17545//serine/threonine-protein kinase ULK4 [EC:2.7.11.1];K03517//quinolinate synthase [EC:2.5.1.72]+ko01100//Metabolic pathways+ko00760//Nicotinate and nicotinamide metabolism	Reverse transcriptase (RNA-dependent DNA polymerase)		retrotransposon protein, putative, Ty1-copia subclass [Oryza sativa Japonica Group]	[R] KOG0017 FOG: Transposon-encoded proteins with TYA, reverse transcriptase, integrase domains in various combinations	Retrovirus-related Pol polyprotein from transposon TNT 1-94 OS=Nicotiana tabacum PE=2 SV=1
CL361.Contig3_All	3857	ko03020//RNA polymerase	Genetic Information Processing	Transcription	-2.02386	5.54887e-57	6.81325e-58	K13806//sn1-specific diacylglycerol lipase [EC:3.1.1.-];K13806//sn1-specific diacylglycerol lipase [EC:3.1.1.-];K03006//DNA-directed RNA polymerase II subunit RPB1 [EC:2.7.7.6]+ko03020//RNA polymerase;K13806//sn1-specific diacylglycerol lipase [EC:3.1.1.-]	Lipase (class 3)		zinc finger fyve domain-containing protein [Plasmopara halstedii]	[TU] KOG1818 Membrane trafficking and cell signaling protein HRS, contains VHS and FYVE domains	CASP-like protein 4A2 OS=Oryza sativa subsp. japonica GN=Os02g0134500 PE=2 SV=2
Unigene4327_All	4918	ko03020//RNA polymerase;ko03013//RNA transport	Genetic Information Processing	Transcription;Translation	-2.02537	7.84583e-181	4.09014e-182	K03006//DNA-directed RNA polymerase II subunit RPB1 [EC:2.7.7.6]+ko03020//RNA polymerase;K14306//nuclear pore complex protein Nup62+ko03013//RNA transport;K14306//nuclear pore complex protein Nup62+ko03013//RNA transport;K14306//nuclear pore complex protein Nup62+ko03013//RNA transport;K14306//nuclear pore complex protein Nup62+ko03013//RNA transport	CS domain	XM_009841845.1 Aphanomyces astaci hypothetical protein mRNA	nuclear migration protein nudC [Thraustotheca clavata]	[T] KOG2265 Nuclear distribution protein NUDC	Protein BOBBER 1 OS=Arabidopsis thaliana GN=BOB1 PE=1 SV=1
CL7763.Contig3_All	778	ko00052//Galactose metabolism;ko00053//Ascorbate and aldarate metabolism;ko03020//RNA polymerase;ko01100//Metabolic pathways;ko00910//Nitrogen metabolism;ko00520//Amino sugar and nucleotide sugar metabolism;ko00630//Glyoxylate and dicarboxylate metabolism;ko00040//Pentose and glucuronate interconversions	Metabolism;Genetic Information Processing	Energy metabolism;Global and overview maps;Carbohydrate metabolism;Transcription	-2.02584	2.63922e-06	1.43064e-06	K17545//serine/threonine-protein kinase ULK4 [EC:2.7.11.1];K12447//UDP-sugar pyrophosphorylase [EC:2.7.7.64]+ko00520//Amino sugar and nucleotide sugar metabolism+ko00040//Pentose and glucuronate interconversions+ko01100//Metabolic pathways+ko00052//Galactose metabolism+ko00053//Ascorbate and aldarate metabolism;K00284//glutamate synthase (ferredoxin) [EC:1.4.7.1]+ko00910//Nitrogen metabolism+ko00…	Reverse transcriptase (RNA-dependent DNA polymerase)		hypothetical protein AALP_AAs49046U000200 [Arabis alpina]	[R] KOG0017 FOG: Transposon-encoded proteins with TYA, reverse transcriptase, integrase domains in various combinations	Retrovirus-related Pol polyprotein from transposon TNT 1-94 OS=Nicotiana tabacum PE=2 SV=1
Unigene32490_All	567	ko01100//Metabolic pathways;ko00940//Phenylpropanoid biosynthesis;ko01110//Biosynthesis of secondary metabolites;ko03020//RNA polymerase	Metabolism;Genetic Information Processing	Global and overview maps;Biosynthesis of other secondary metabolites;Transcription	-2.0344	0.000733863	0.000551823	K02184//formin 2;K02184//formin 2;K03006//DNA-directed RNA polymerase II subunit RPB1 [EC:2.7.7.6]+ko03020//RNA polymerase;K00430//peroxidase [EC:1.11.1.7]+ko01100//Metabolic pathways+ko01110//Biosynthesis of secondary metabolites+ko00940//Phenylpropanoid biosynthesis;K22020//mucin-19	Ankyrin repeats (many copies)		hypothetical protein EMIHUDRAFT_445142 [Emiliania huxleyi CCMP1516] >EOD18554.1 hypothetical protein EMIHUDRAFT_445142 [Emiliania huxleyi CCMP1516]	[W] KOG3544 Collagens (type IV and type XIII), and related proteins	Formin-like protein 3 OS=Oryza sativa subsp. japonica GN=FH3 PE=2 SV=2	GO:0004252//serine-type endopeptidase activity
CL2024.Contig2_All	6960	ko00910//Nitrogen metabolism;ko03020//RNA polymerase;ko04144//Endocytosis;ko00630//Glyoxylate and dicarboxylate metabolism	Cellular Processes;Genetic Information Processing;Metabolism	Energy metabolism;Transcription;Carbohydrate metabolism;Transport and catabolism	-2.04942	0	0	K03006//DNA-directed RNA polymerase II subunit RPB1 [EC:2.7.7.6]+ko03020//RNA polymerase;K01528//dynamin GTPase [EC:3.6.5.5]+ko04144//Endocytosis;K00284//glutamate synthase (ferredoxin) [EC:1.4.7.1]+ko00910//Nitrogen metabolism+ko00630//Glyoxylate and dicarboxylate metabolism;K17545//serine/threonine-protein kinase ULK4 [EC:2.7.11.1]	Reverse transcriptase (RNA-dependent DNA polymerase)		polyprotein [Arabidopsis thaliana]	[R] KOG0017 FOG: Transposon-encoded proteins with TYA, reverse transcriptase, integrase domains in various combinations	Uncharacterized mitochondrial protein AtMg00810 OS=Arabidopsis thaliana GN=AtMg00810 PE=4 SV=1
CL1723.Contig6_All	2746	ko03020//RNA polymerase	Genetic Information Processing	Transcription	-2.07902	0	0	K10955//mucin-2;K04733//interleukin-1 receptor-associated kinase 4 [EC:2.7.11.1];K10990//RecQ-mediated genome instability protein 1;K03006//DNA-directed RNA polymerase II subunit RPB1 [EC:2.7.7.6]+ko03020//RNA polymerase	Peroxidase		hypothetical protein H310_03146 [Aphanomyces invadans] >ETW07074.1 hypothetical protein H310_03146 [Aphanomyces invadans]	[WV] KOG1216 von Willebrand factor and related coagulation proteins	Lysine-rich arabinogalactan protein 18 OS=Arabidopsis thaliana GN=AGP18 PE=2 SV=1	GO:0016539//intein-mediated protein splicing;GO:0008233//peptidase activity;GO:0016021//integral component of membrane
Unigene35192_All	1298	ko03020//RNA polymerase	Genetic Information Processing	Transcription	-2.10841	2.78072e-10	1.0988e-10	K03006//DNA-directed RNA polymerase II subunit RPB1 [EC:2.7.7.6]+ko03020//RNA polymerase;K03006//DNA-directed RNA polymerase II subunit RPB1 [EC:2.7.7.6]+ko03020//RNA polymerase;K02184//formin 2;K03006//DNA-directed RNA polymerase II subunit RPB1 [EC:2.7.7.6]+ko03020//RNA polymerase	Phage Tail Collar Domain		PREDICTED: nascent polypeptide-associated complex subunit alpha, muscle-specific form-like [Daucus carota subsp. sativus]	[W] KOG3544 Collagens (type IV and type XIII), and related proteins	Leucine-rich repeat extensin-like protein 5 OS=Arabidopsis thaliana GN=LRX5 PE=2 SV=2
CL10468.Contig1_All	1697	ko01100//Metabolic pathways;ko00940//Phenylpropanoid biosynthesis;ko03020//RNA polymerase;ko01110//Biosynthesis of secondary metabolites	Metabolism;Genetic Information Processing	Transcription;Biosynthesis of other secondary metabolites;Global and overview maps	-2.10915	7.05528e-210	3.2509e-211	K03006//DNA-directed RNA polymerase II subunit RPB1 [EC:2.7.7.6]+ko03020//RNA polymerase;K00430//peroxidase [EC:1.11.1.7]+ko01100//Metabolic pathways+ko01110//Biosynthesis of secondary metabolites+ko00940//Phenylpropanoid biosynthesis;K00430//peroxidase [EC:1.11.1.7]+ko01100//Metabolic pathways+ko01110//Biosynthesis of secondary metabolites+ko00940//Phenylpropanoid biosynthesis	PT repeat		hypothetical protein Naga_101468g1, partial [Nannochloropsis gaditana]	[OW] KOG1565 Gelatinase A and related matrix metalloproteases	Classical arabinogalactan protein 10 OS=Arabidopsis thaliana GN=AGP10 PE=1 SV=1	GO:0016539//intein-mediated protein splicing;GO:0008233//peptidase activity;GO:0016021//integral component of membrane
Unigene6373_All	1253	ko03020//RNA polymerase	Genetic Information Processing	Transcription	-2.12413	1.40862e-40	2.1962e-41	K03006//DNA-directed RNA polymerase II subunit RPB1 [EC:2.7.7.6]+ko03020//RNA polymerase		AM483648.1 Vitis vinifera, whole genome shotgun sequence, contig VV78X165152.5, clone ENTAV 115	hypothetical protein CISIN_1g041434mg [Citrus sinensis]
Unigene15849_All	1690	ko03010//Ribosome;ko03020//RNA polymerase	Genetic Information Processing	Transcription;Translation	-2.13006	9.6465e-67	1.05602e-67	K03046//DNA-directed RNA polymerase subunit beta' [EC:2.7.7.6]+ko03020//RNA polymerase;K02948//small subunit ribosomal protein S11+ko03010//Ribosome		EU600086.1 Pueraria montana var. lobata 16S ribosomal RNA gene, partial sequence	hypothetical protein M569_00222, partial [Genlisea aurea]
Unigene36947_All	1070	ko01100//Metabolic pathways;ko00040//Pentose and glucuronate interconversions;ko03015//mRNA surveillance pathway;ko03020//RNA polymerase;ko03013//RNA transport;ko03040//Spliceosome	Genetic Information Processing;Metabolism	Global and overview maps;Carbohydrate metabolism;Transcription;Translation	-2.1369	4.18106e-07	2.09883e-07	K01051//pectinesterase [EC:3.1.1.11]+ko00040//Pentose and glucuronate interconversions+ko01100//Metabolic pathways;K12875//apoptotic chromatin condensation inducer in the nucleus+ko03040//Spliceosome+ko03015//mRNA surveillance pathway+ko03013//RNA transport;K14306//nuclear pore complex protein Nup62+ko03013//RNA transport;K03006//DNA-directed RNA polymerase II subunit RPB1 [EC:2.7.7.6]+ko03020//R…	PT repeat		hypothetical protein FRACYDRAFT_232027 [Fragilariopsis cylindrus CCMP1102]	[R] KOG0391 SNF2 family DNA-dependent ATPase	Protein TIC 214 OS=Cucumis sativus GN=TIC214 PE=3 SV=2	GO:0016539//intein-mediated protein splicing;GO:0008233//peptidase activity;GO:0016021//integral component of membrane
Unigene13567_All	1332	ko03010//Ribosome;ko03020//RNA polymerase	Genetic Information Processing	Translation;Transcription	-2.14677	1.42244e-11	5.19563e-12	K02948//small subunit ribosomal protein S11+ko03010//Ribosome;K03046//DNA-directed RNA polymerase subunit beta' [EC:2.7.7.6]+ko03020//RNA polymerase		AB234297.1 Pseudoscourfieldia sp. Nak chloroplast gene for 16S rRNA, partial sequence	hypothetical protein (mitochondrion) [Vicia faba]
Unigene8564_All	2572	ko03020//RNA polymerase;ko02010//ABC transporters	Environmental Information Processing;Genetic Information Processing	Membrane transport;Transcription	-2.15806	3.16716e-18	8.57136e-19	K05666//ATP-binding cassette, subfamily C (CFTR/MRP), member 2+ko02010//ABC transporters;K04733//interleukin-1 receptor-associated kinase 4 [EC:2.7.11.1];K03006//DNA-directed RNA polymerase II subunit RPB1 [EC:2.7.7.6]+ko03020//RNA polymerase;K02350//DNA polymerase zeta [EC:2.7.7.7];K17545//serine/threonine-protein kinase ULK4 [EC:2.7.11.1]	Ankyrin repeats (many copies)		hypothetical protein PHYSODRAFT_368964, partial [Phytophthora sojae] >EGZ12853.1 hypothetical protein PHYSODRAFT_368964, partial [Phytophthora sojae]	[R] KOG0017 FOG: Transposon-encoded proteins with TYA, reverse transcriptase, integrase domains in various combinations	Retrovirus-related Pol polyprotein from transposon TNT 1-94 OS=Nicotiana tabacum PE=2 SV=1
Unigene58296_All	1213	ko03020//RNA polymerase	Genetic Information Processing	Transcription	-2.18641	5.41246e-06	3.04115e-06	K03043//DNA-directed RNA polymerase subunit beta [EC:2.7.7.6]+ko03020//RNA polymerase;K03046//DNA-directed RNA polymerase subunit beta' [EC:2.7.7.6]+ko03020//RNA polymerase;K03043//DNA-directed RNA polymerase subunit beta [EC:2.7.7.6]+ko03020//RNA polymerase;K03043//DNA-directed RNA polymerase subunit beta [EC:2.7.7.6]+ko03020//RNA polymerase;K03043//DNA-directed RNA polymerase subunit beta [EC:2…	RNA polymerase beta subunit		RNA polymerase beta subunit, partial [Rhododendron catawbiense]	[K] KOG0214 RNA polymerase II, second largest subunit	DNA-directed RNA polymerase subunit beta OS=Rhodomonas salina GN=rpoB PE=3 SV=1	GO:0003899//DNA-directed 5'-3' RNA polymerase activity;GO:0032549//ribonucleoside binding;GO:0003677//DNA binding;GO:0006351//transcription, DNA-templated;GO:0009536//plastid
Unigene21911_All	2533	ko03020//RNA polymerase	Genetic Information Processing	Transcription	-2.19825	8.59078e-100	7.03738e-101	K02184//formin 2;K03006//DNA-directed RNA polymerase II subunit RPB1 [EC:2.7.7.6]+ko03020//RNA polymerase;K02184//formin 2;K02184//formin 2;K02184//formin 2	Predicted metal-binding integral membrane protein (DUF2182)		hornerin-like, partial [Zea mays]	[W] KOG3544 Collagens (type IV and type XIII), and related proteins
CL8976.Contig3_All	1594	ko00940//Phenylpropanoid biosynthesis;ko00040//Pentose and glucuronate interconversions;ko03020//RNA polymerase;ko01110//Biosynthesis of secondary metabolites;ko01100//Metabolic pathways	Genetic Information Processing;Metabolism	Transcription;Biosynthesis of other secondary metabolites;Global and overview maps;Carbohydrate metabolism	-2.2766	1.42503e-205	6.67509e-207	K04733//interleukin-1 receptor-associated kinase 4 [EC:2.7.11.1];K10990//RecQ-mediated genome instability protein 1;K03006//DNA-directed RNA polymerase II subunit RPB1 [EC:2.7.7.6]+ko03020//RNA polymerase;K00430//peroxidase [EC:1.11.1.7]+ko01100//Metabolic pathways+ko01110//Biosynthesis of secondary metabolites+ko00940//Phenylpropanoid biosynthesis;K01051//pectinesterase [EC:3.1.1.11]+ko00040//Pe…	PT repeat		hypothetical protein FRACYDRAFT_232027 [Fragilariopsis cylindrus CCMP1102]	[WV] KOG1216 von Willebrand factor and related coagulation proteins	Protein TIC 214 OS=Cucumis sativus GN=TIC214 PE=3 SV=2	GO:0016539//intein-mediated protein splicing;GO:0008233//peptidase activity;GO:0016021//integral component of membrane
Unigene11896_All	1980	ko03010//Ribosome;ko03020//RNA polymerase	Genetic Information Processing	Translation;Transcription	-2.29214	1.82149e-172	9.86933e-174	K03046//DNA-directed RNA polymerase subunit beta' [EC:2.7.7.6]+ko03020//RNA polymerase;K02948//small subunit ribosomal protein S11+ko03010//Ribosome		KT305103.1 Trachelomonas sp. Jakeun052407A small subunit ribosomal RNA gene, partial sequence; chloroplast	hypothetical protein BVRB_035640 [Beta vulgaris subsp. vulgaris]			GO:0009507//chloroplast
Unigene58298_All	1674	ko03020//RNA polymerase;ko03010//Ribosome	Genetic Information Processing	Translation;Transcription	-2.31105	4.06596e-26	8.63475e-27	K03046//DNA-directed RNA polymerase subunit beta' [EC:2.7.7.6]+ko03020//RNA polymerase;K02948//small subunit ribosomal protein S11+ko03010//Ribosome		AB234297.1 Pseudoscourfieldia sp. Nak chloroplast gene for 16S rRNA, partial sequence	PREDICTED: uncharacterized protein LOC107949870 [Gossypium hirsutum]			GO:0005739//mitochondrion;GO:0003676//nucleic acid binding
Unigene14658_All	1724	ko03010//Ribosome;ko03020//RNA polymerase	Genetic Information Processing	Translation;Transcription	-2.31593	2.10895e-32	3.88404e-33	K03046//DNA-directed RNA polymerase subunit beta' [EC:2.7.7.6]+ko03020//RNA polymerase;K02948//small subunit ribosomal protein S11+ko03010//Ribosome		KJ410683.1 Nannochloropsis oceanica strain LAMB0001 chloroplast, partial genome	hypothetical protein BVRB_035640 [Beta vulgaris subsp. vulgaris]			GO:0005739//mitochondrion;GO:0003676//nucleic acid binding
Unigene48268_All	1950	ko03020//RNA polymerase;ko03010//Ribosome	Genetic Information Processing	Transcription;Translation	-2.35504	2.41349e-103	1.92611e-104	K02948//small subunit ribosomal protein S11+ko03010//Ribosome;K03046//DNA-directed RNA polymerase subunit beta' [EC:2.7.7.6]+ko03020//RNA polymerase		KX284728.2 Rhodochaete parvula plastid, complete genome	unknow protein [Oryza sativa Japonica Group]
Unigene37661_All	2292	ko03020//RNA polymerase	Genetic Information Processing	Transcription	-2.36246	7.73887e-32	1.44269e-32	K03040//DNA-directed RNA polymerase subunit alpha [EC:2.7.7.6]+ko03020//RNA polymerase;K03040//DNA-directed RNA polymerase subunit alpha [EC:2.7.7.6]+ko03020//RNA polymerase;K03040//DNA-directed RNA polymerase subunit alpha [EC:2.7.7.6]+ko03020//RNA polymerase;K03040//DNA-directed RNA polymerase subunit alpha [EC:2.7.7.6]+ko03020//RNA polymerase;K03040//DNA-directed RNA polymerase subunit alpha […	Ribosomal protein S11		RNA polymerase alpha subunit (plastid) [Cryptomonas curvata] >ASO75832.1 RNA polymerase alpha subunit (plastid) [Cryptomonas curvata]	[J] KOG0408 Mitochondrial/chloroplast ribosomal protein S11	DNA-directed RNA polymerase subunit alpha OS=Rhodomonas salina GN=rpoA PE=3 SV=1	GO:0005840//ribosome;GO:0003723//RNA binding;GO:0003677//DNA binding;GO:0006351//transcription, DNA-templated;GO:0046983//protein dimerization activity;GO:0003899//DNA-directed 5'-3' RNA polymerase activity;GO:0006412//translation;GO:0003735//structural constituent of ribosome;GO:0009507//chloroplast
CL8976.Contig2_All	1797	ko01100//Metabolic pathways;ko03020//RNA polymerase;ko00040//Pentose and glucuronate interconversions	Metabolism;Genetic Information Processing	Carbohydrate metabolism;Transcription;Global and overview maps	-2.48149	1.28279e-233	5.46185e-235	K01051//pectinesterase [EC:3.1.1.11]+ko00040//Pentose and glucuronate interconversions+ko01100//Metabolic pathways;K10955//mucin-2;K18749//protein LSM14;K03006//DNA-directed RNA polymerase II subunit RPB1 [EC:2.7.7.6]+ko03020//RNA polymerase;K04733//interleukin-1 receptor-associated kinase 4 [EC:2.7.11.1]	PT repeat		hypothetical protein H310_03146 [Aphanomyces invadans] >ETW07074.1 hypothetical protein H310_03146 [Aphanomyces invadans]	[T] KOG1187 Serine/threonine protein kinase	Classical arabinogalactan protein 9 OS=Arabidopsis thaliana GN=AGP9 PE=1 SV=2	GO:0016539//intein-mediated protein splicing;GO:0008233//peptidase activity;GO:0016021//integral component of membrane
Unigene4350_All	1814	ko03020//RNA polymerase;ko03010//Ribosome	Genetic Information Processing	Transcription;Translation	-2.49621	3.16025e-81	2.98542e-82	K03046//DNA-directed RNA polymerase subunit beta' [EC:2.7.7.6]+ko03020//RNA polymerase;K02948//small subunit ribosomal protein S11+ko03010//Ribosome		KR020505.1 Wildemania schizophylla voucher UC 306400 plastid, complete genome	hypothetical protein KK1_029344, partial [Cajanus cajan]
CL8485.Contig4_All	1309	ko03018//RNA degradation;ko03020//RNA polymerase	Genetic Information Processing	Transcription;Folding, sorting and degradation	-2.53074	6.00771e-18	1.63942e-18	K17545//serine/threonine-protein kinase ULK4 [EC:2.7.11.1];K15601//lysine-specific demethylase 3 [EC:1.14.11.-];K03006//DNA-directed RNA polymerase II subunit RPB1 [EC:2.7.7.6]+ko03020//RNA polymerase;K04077//chaperonin GroEL+ko03018//RNA degradation	Reverse transcriptase (RNA-dependent DNA polymerase)		copia LTR rider [Solanum lycopersicum] >ABO36636.1 copia LTR rider [Solanum lycopersicum]	[R] KOG0017 FOG: Transposon-encoded proteins with TYA, reverse transcriptase, integrase domains in various combinations	Retrovirus-related Pol polyprotein from transposon TNT 1-94 OS=Nicotiana tabacum PE=2 SV=1
Unigene11634_All	966	ko03020//RNA polymerase	Genetic Information Processing	Transcription	-2.57284	1.83478e-10	7.17556e-11	K03046//DNA-directed RNA polymerase subunit beta' [EC:2.7.7.6]+ko03020//RNA polymerase		AB234297.1 Pseudoscourfieldia sp. Nak chloroplast gene for 16S rRNA, partial sequence	PREDICTED: uncharacterized protein LOC107949870 [Gossypium hirsutum]			GO:0005739//mitochondrion;GO:0003676//nucleic acid binding
CL1426.Contig1_All	2085	ko03020//RNA polymerase	Genetic Information Processing	Transcription	-2.57554	2.52565e-18	6.81135e-19	K03040//DNA-directed RNA polymerase subunit alpha [EC:2.7.7.6]+ko03020//RNA polymerase;K03040//DNA-directed RNA polymerase subunit alpha [EC:2.7.7.6]+ko03020//RNA polymerase;K03040//DNA-directed RNA polymerase subunit alpha [EC:2.7.7.6]+ko03020//RNA polymerase;K03040//DNA-directed RNA polymerase subunit alpha [EC:2.7.7.6]+ko03020//RNA polymerase;K03040//DNA-directed RNA polymerase subunit alpha […	Ribosomal protein S11		[pt] DNA-directed RNA polymerase subunit alpha [Galdieria sulphuraria] >EME28488.1 [pt] DNA-directed RNA polymerase subunit alpha [Galdieria sulphuraria]	[J] KOG0408 Mitochondrial/chloroplast ribosomal protein S11	DNA-directed RNA polymerase subunit alpha OS=Chlorokybus atmophyticus GN=rpoA PE=3 SV=1	GO:0003899//DNA-directed 5'-3' RNA polymerase activity;GO:0005840//ribosome;GO:0003723//RNA binding;GO:0003677//DNA binding;GO:0006412//translation;GO:0006351//transcription, DNA-templated;GO:0003735//structural constituent of ribosome;GO:0046983//protein dimerization activity
Unigene7759_All	1500	ko03020//RNA polymerase;ko03010//Ribosome	Genetic Information Processing	Translation;Transcription	-2.61526	5.2966e-14	1.70966e-14	K03046//DNA-directed RNA polymerase subunit beta' [EC:2.7.7.6]+ko03020//RNA polymerase;K02948//small subunit ribosomal protein S11+ko03010//Ribosome		AB252057.1 Brassica napus gene for 16S rRNA, partial sequence	PREDICTED: uncharacterized protein LOC107949870 [Gossypium hirsutum]			GO:0003676//nucleic acid binding
Unigene16405_All	911	ko04144//Endocytosis;ko03020//RNA polymerase	Genetic Information Processing;Cellular Processes	Transport and catabolism;Transcription	-2.64911	1.69606e-08	7.57692e-09	K15188//cyclin T;K03006//DNA-directed RNA polymerase II subunit RPB1 [EC:2.7.7.6]+ko03020//RNA polymerase;K03006//DNA-directed RNA polymerase II subunit RPB1 [EC:2.7.7.6]+ko03020//RNA polymerase;K12471//epsin+ko04144//Endocytosis;K03006//DNA-directed RNA polymerase II subunit RPB1 [EC:2.7.7.6]+ko03020//RNA polymerase	Alpha-macro-globulin thiol-ester bond-forming region		PREDICTED: DNA-directed RNA polymerase II subunit RPB1-like [Oryza sativa Japonica Group] >CAE02745.2 OSJNBa0006B20.10 [Oryza sativa Japonica Group] >CAH67574.1 H0315A08.4 [Oryza sativa] >EAY94212.1 hypothetical protein OsI_15986 [Oryza sativa Indica Group] >BAS89314.1 Os04g0437200 [Oryza sativa Japonica Group]
Unigene27817_All	1011	ko03020//RNA polymerase;ko01110//Biosynthesis of secondary metabolites;ko01100//Metabolic pathways;ko00940//Phenylpropanoid biosynthesis	Genetic Information Processing;Metabolism	Global and overview maps;Transcription;Biosynthesis of other secondary metabolites	-2.69262	2.01618e-16	5.87085e-17	K03006//DNA-directed RNA polymerase II subunit RPB1 [EC:2.7.7.6]+ko03020//RNA polymerase;K00430//peroxidase [EC:1.11.1.7]+ko01100//Metabolic pathways+ko01110//Biosynthesis of secondary metabolites+ko00940//Phenylpropanoid biosynthesis;K10955//mucin-2;K10990//RecQ-mediated genome instability protein 1	PT repeat		hypothetical protein Naga_101468g1, partial [Nannochloropsis gaditana]	[WV] KOG1216 von Willebrand factor and related coagulation proteins	Early nodulin-20 OS=Medicago truncatula GN=ENOD20 PE=3 SV=1	GO:0016539//intein-mediated protein splicing;GO:0008233//peptidase activity;GO:0016021//integral component of membrane
Unigene18204_All	2497	ko03020//RNA polymerase	Genetic Information Processing	Transcription	-2.70742	3.90687e-139	2.52388e-140	K02184//formin 2;K02184//formin 2;K03006//DNA-directed RNA polymerase II subunit RPB1 [EC:2.7.7.6]+ko03020//RNA polymerase	Arylsulfotransferase (ASST)		RecName: Full=Vegetative cell wall protein gp1; AltName: Full=Hydroxyproline-rich glycoprotein 1; Flags: Precursor >AAG45420.1 vegetative cell wall protein gp1 [Chlamydomonas reinhardtii]	[TZ] KOG3671 Actin regulatory protein (Wiskott-Aldrich syndrome protein)	Formin-like protein 5 OS=Oryza sativa subsp. japonica GN=FH5 PE=2 SV=2
CL1723.Contig7_All	2257	ko03013//RNA transport;ko03020//RNA polymerase;ko03015//mRNA surveillance pathway;ko03040//Spliceosome	Genetic Information Processing	Transcription;Translation	-2.82251	0	0	K10955//mucin-2;K12875//apoptotic chromatin condensation inducer in the nucleus+ko03040//Spliceosome+ko03015//mRNA surveillance pathway+ko03013//RNA transport;K10990//RecQ-mediated genome instability protein 1;K03006//DNA-directed RNA polymerase II subunit RPB1 [EC:2.7.7.6]+ko03020//RNA polymerase	Peroxidase	DQ388028.1 Aucoumea klaineana clone ak21 microsatellite sequence	hypothetical protein Naga_100543g1 [Nannochloropsis gaditana]	[WV] KOG1216 von Willebrand factor and related coagulation proteins	Classical arabinogalactan protein 10 OS=Arabidopsis thaliana GN=AGP10 PE=1 SV=1	GO:0016539//intein-mediated protein splicing;GO:0008233//peptidase activity;GO:0016021//integral component of membrane
Unigene12839_All	1872	ko03020//RNA polymerase;ko03010//Ribosome	Genetic Information Processing	Transcription;Translation	-2.85288	0	0	K02948//small subunit ribosomal protein S11+ko03010//Ribosome;K03046//DNA-directed RNA polymerase subunit beta' [EC:2.7.7.6]+ko03020//RNA polymerase		EU600086.1 Pueraria montana var. lobata 16S ribosomal RNA gene, partial sequence	hypothetical protein M569_00222, partial [Genlisea aurea]
Unigene9363_All	1260	ko03010//Ribosome;ko03020//RNA polymerase	Genetic Information Processing	Translation;Transcription	-2.86709	3.56442e-08	1.63186e-08	K03046//DNA-directed RNA polymerase subunit beta' [EC:2.7.7.6]+ko03020//RNA polymerase;K02948//small subunit ribosomal protein S11+ko03010//Ribosome		FJ719709.1 Trachelomonas volvocinopsis var. spiralis strain UTEX1313 16S ribosomal RNA gene, partial sequence; chloroplast	PREDICTED: uncharacterized protein LOC107949870 [Gossypium hirsutum]			GO:0003676//nucleic acid binding
Unigene88419_All	1599	ko03020//RNA polymerase;ko03010//Ribosome	Genetic Information Processing	Translation;Transcription	-2.87419	0	0	K02948//small subunit ribosomal protein S11+ko03010//Ribosome;K03046//DNA-directed RNA polymerase subunit beta' [EC:2.7.7.6]+ko03020//RNA polymerase		EU600086.1 Pueraria montana var. lobata 16S ribosomal RNA gene, partial sequence	hypothetical protein M569_00222, partial [Genlisea aurea]
Unigene14881_All	1728	ko03020//RNA polymerase;ko03010//Ribosome	Genetic Information Processing	Transcription;Translation	-2.87542	2.94104e-303	1.00025e-304	K02948//small subunit ribosomal protein S11+ko03010//Ribosome;K03046//DNA-directed RNA polymerase subunit beta' [EC:2.7.7.6]+ko03020//RNA polymerase		EU600086.1 Pueraria montana var. lobata 16S ribosomal RNA gene, partial sequence	unknow protein [Oryza sativa Japonica Group]
CL9115.Contig1_All	2692	ko03020//RNA polymerase	Genetic Information Processing	Transcription	-2.89282	1.77561e-21	4.28614e-22	K02184//formin 2;K03006//DNA-directed RNA polymerase II subunit RPB1 [EC:2.7.7.6]+ko03020//RNA polymerase;K02184//formin 2;K16628//collagen, type VII, alpha;K10990//RecQ-mediated genome instability protein 1	Calponin homology (CH) domain		hypothetical protein BU14_0883s0004, partial [Porphyra umbilicalis]	[W] KOG3544 Collagens (type IV and type XIII), and related proteins	Formin-like protein 18 OS=Oryza sativa subsp. japonica GN=FH18 PE=2 SV=1
Unigene8288_All	1574	ko03010//Ribosome;ko03020//RNA polymerase	Genetic Information Processing	Transcription;Translation	-2.8976	0	0	K03046//DNA-directed RNA polymerase subunit beta' [EC:2.7.7.6]+ko03020//RNA polymerase;K02948//small subunit ribosomal protein S11+ko03010//Ribosome		KJ410683.1 Nannochloropsis oceanica strain LAMB0001 chloroplast, partial genome	unknow protein [Oryza sativa Japonica Group]
Unigene12004_All	1948	ko03020//RNA polymerase	Genetic Information Processing	Transcription	-2.92614	0	0	K03046//DNA-directed RNA polymerase subunit beta' [EC:2.7.7.6]+ko03020//RNA polymerase		EU600086.1 Pueraria montana var. lobata 16S ribosomal RNA gene, partial sequence	unknow protein [Oryza sativa Japonica Group]
CL10243.Contig1_All	1605	ko01100//Metabolic pathways;ko03020//RNA polymerase;ko00760//Nicotinate and nicotinamide metabolism	Metabolism;Genetic Information Processing	Transcription;Metabolism of cofactors and vitamins;Global and overview maps	-2.9535	0.000801624	0.000605903	K11593//eukaryotic translation initiation factor 2C;K03006//DNA-directed RNA polymerase II subunit RPB1 [EC:2.7.7.6]+ko03020//RNA polymerase;K22686//pro-apoptotic serine protease NMA111 [EC:3.4.21.-];K03517//quinolinate synthase [EC:2.5.1.72]+ko01100//Metabolic pathways+ko00760//Nicotinate and nicotinamide metabolism;K04733//interleukin-1 receptor-associated kinase 4 [EC:2.7.11.1]	GAG-pre-integrase domain		Integrase, catalytic core [Corchorus capsularis]	[R] KOG0017 FOG: Transposon-encoded proteins with TYA, reverse transcriptase, integrase domains in various combinations	Retrovirus-related Pol polyprotein from transposon TNT 1-94 OS=Nicotiana tabacum PE=2 SV=1
Unigene76875_All	1036	ko03020//RNA polymerase	Genetic Information Processing	Transcription	-2.95825	2.3436e-215	1.06055e-216	K03046//DNA-directed RNA polymerase subunit beta' [EC:2.7.7.6]+ko03020//RNA polymerase		EU600086.1 Pueraria montana var. lobata 16S ribosomal RNA gene, partial sequence	unknow protein [Oryza sativa Japonica Group]
Unigene29437_All	5425	ko04141//Protein processing in endoplasmic reticulum;ko04145//Phagosome;ko03020//RNA polymerase;ko03060//Protein export	Genetic Information Processing;Cellular Processes	Transport and catabolism;Transcription;Folding, sorting and degradation	-3.01195	3.75302e-171	2.04482e-172	K03040//DNA-directed RNA polymerase subunit alpha [EC:2.7.7.6]+ko03020//RNA polymerase;K10956//protein transport protein SEC61 subunit alpha+ko04145//Phagosome+ko04141//Protein processing in endoplasmic reticulum+ko03060//Protein export;K10956//protein transport protein SEC61 subunit alpha+ko04145//Phagosome+ko04141//Protein processing in endoplasmic reticulum+ko03060//Protein export;K10956//prot…	SecY translocase		PREDICTED: uncharacterized protein LOC103941582 [Pyrus x bretschneideri]	[F] KOG3078 Adenylate kinase	Protein translocase subunit SecY OS=Pyropia yezoensis GN=secY PE=3 SV=1
Unigene12941_All	1612	ko03020//RNA polymerase;ko03010//Ribosome	Genetic Information Processing	Transcription;Translation	-3.06271	1.05513e-75	1.05194e-76	K02948//small subunit ribosomal protein S11+ko03010//Ribosome;K03046//DNA-directed RNA polymerase subunit beta' [EC:2.7.7.6]+ko03020//RNA polymerase		AB252057.1 Brassica napus gene for 16S rRNA, partial sequence	hypothetical protein M569_00260, partial [Genlisea aurea]
Unigene15366_All	1574	ko03020//RNA polymerase	Genetic Information Processing	Transcription	-3.08491	2.39698e-74	2.42685e-75	K03046//DNA-directed RNA polymerase subunit beta' [EC:2.7.7.6]+ko03020//RNA polymerase		KJ410683.1 Nannochloropsis oceanica strain LAMB0001 chloroplast, partial genome	hypothetical protein M569_00222, partial [Genlisea aurea]
Unigene6680_All	1087	ko03010//Ribosome;ko03020//RNA polymerase	Genetic Information Processing	Translation;Transcription	-3.11036	1.60942e-93	1.37537e-94	K02948//small subunit ribosomal protein S11+ko03010//Ribosome;K03046//DNA-directed RNA polymerase subunit beta' [EC:2.7.7.6]+ko03020//RNA polymerase		KJ410683.1 Nannochloropsis oceanica strain LAMB0001 chloroplast, partial genome	hypothetical protein M569_00222, partial [Genlisea aurea]
Unigene9333_All	1854	ko03020//RNA polymerase	Genetic Information Processing	Transcription	-3.12083	3.36267e-89	2.97714e-90	K03046//DNA-directed RNA polymerase subunit beta' [EC:2.7.7.6]+ko03020//RNA polymerase		EU600086.1 Pueraria montana var. lobata 16S ribosomal RNA gene, partial sequence	unknow protein [Oryza sativa Japonica Group]
Unigene15907_All	1290	ko04144//Endocytosis;ko03020//RNA polymerase	Cellular Processes;Genetic Information Processing	Transcription;Transport and catabolism	-3.16039	5.20346e-22	1.23565e-22	K03006//DNA-directed RNA polymerase II subunit RPB1 [EC:2.7.7.6]+ko03020//RNA polymerase;K05747//Wiskott-Aldrich syndrome protein+ko04144//Endocytosis;K18749//protein LSM14	PT repeat		hypothetical protein FRACYDRAFT_232027 [Fragilariopsis cylindrus CCMP1102]	[RW] LSE0104 H Chondroitin sulfate proteoglycan	Early nodulin-20 OS=Medicago truncatula GN=ENOD20 PE=3 SV=1
Unigene11635_All	1032	ko03020//RNA polymerase	Genetic Information Processing	Transcription	-3.16929	1.02465e-243	4.21024e-245	K03046//DNA-directed RNA polymerase subunit beta' [EC:2.7.7.6]+ko03020//RNA polymerase		EU600086.1 Pueraria montana var. lobata 16S ribosomal RNA gene, partial sequence	hypothetical protein M569_00222, partial [Genlisea aurea]
Unigene12293_All	1318	ko03010//Ribosome;ko03020//RNA polymerase	Genetic Information Processing	Translation;Transcription	-3.20575	1.70165e-226	7.3856e-228	K03046//DNA-directed RNA polymerase subunit beta' [EC:2.7.7.6]+ko03020//RNA polymerase;K02948//small subunit ribosomal protein S11+ko03010//Ribosome		EU600086.1 Pueraria montana var. lobata 16S ribosomal RNA gene, partial sequence	unknow protein [Oryza sativa Japonica Group]
CL843.Contig8_All	4020	ko00040//Pentose and glucuronate interconversions;ko03013//RNA transport;ko01100//Metabolic pathways;ko03020//RNA polymerase;ko03040//Spliceosome;ko03015//mRNA surveillance pathway	Metabolism;Genetic Information Processing	Carbohydrate metabolism;Transcription;Translation;Global and overview maps	-3.25546	0	0	K10955//mucin-2;K03006//DNA-directed RNA polymerase II subunit RPB1 [EC:2.7.7.6]+ko03020//RNA polymerase;K03006//DNA-directed RNA polymerase II subunit RPB1 [EC:2.7.7.6]+ko03020//RNA polymerase;K01051//pectinesterase [EC:3.1.1.11]+ko00040//Pentose and glucuronate interconversions+ko01100//Metabolic pathways;K12875//apoptotic chromatin condensation inducer in the nucleus+ko03040//Spliceosome+ko030…	Somatomedin B domain		hypothetical protein FRACYDRAFT_260357 [Fragilariopsis cylindrus CCMP1102]	[T] LSE0513 C 7-transmembrane receptor	Protein TIC 214 OS=Cucumis sativus GN=TIC214 PE=3 SV=2	GO:0008237//metallopeptidase activity
Unigene16123_All	1107	ko01100//Metabolic pathways;ko00940//Phenylpropanoid biosynthesis;ko03020//RNA polymerase;ko01110//Biosynthesis of secondary metabolites	Metabolism;Genetic Information Processing	Transcription;Global and overview maps;Biosynthesis of other secondary metabolites	-3.28233	1.56616e-18	4.19098e-19	K00430//peroxidase [EC:1.11.1.7]+ko01100//Metabolic pathways+ko01110//Biosynthesis of secondary metabolites+ko00940//Phenylpropanoid biosynthesis;K03006//DNA-directed RNA polymerase II subunit RPB1 [EC:2.7.7.6]+ko03020//RNA polymerase;K17987//next to BRCA1 gene 1 protein;K04733//interleukin-1 receptor-associated kinase 4 [EC:2.7.11.1];K03006//DNA-directed RNA polymerase II subunit RPB1 [EC:2.7.7.…	NMT1-like family		flocculation protein FLO11-like [Chenopodium quinoa]	[K] KOG0260 RNA polymerase II, large subunit	Proline-rich receptor-like protein kinase PERK2 OS=Arabidopsis thaliana GN=PERK2 PE=2 SV=3	GO:0004674//protein serine/threonine kinase activity;GO:0005524//ATP binding;GO:0016021//integral component of membrane
CL1594.Contig1_All	3051	ko03020//RNA polymerase	Genetic Information Processing	Transcription	-3.33515	1.46372e-22	3.42022e-23	K03046//DNA-directed RNA polymerase subunit beta' [EC:2.7.7.6]+ko03020//RNA polymerase;K03043//DNA-directed RNA polymerase subunit beta [EC:2.7.7.6]+ko03020//RNA polymerase;K03043//DNA-directed RNA polymerase subunit beta [EC:2.7.7.6]+ko03020//RNA polymerase;K03043//DNA-directed RNA polymerase subunit beta [EC:2.7.7.6]+ko03020//RNA polymerase;K03043//DNA-directed RNA polymerase subunit beta [EC:2…	RNA polymerase Rpb2, domain 6		DNA-directed RNA polymerase beta subunit (chromatophore) [Paulinella chromatophora] >ACB42549.1 DNA-directed RNA polymerase beta subunit (chromatophore) [Paulinella chromatophora]	[K] KOG0214 RNA polymerase II, second largest subunit	DNA-directed RNA polymerase subunit beta OS=Rhodomonas salina GN=rpoB PE=3 SV=1	GO:0003899//DNA-directed 5'-3' RNA polymerase activity;GO:0032549//ribonucleoside binding;GO:0003677//DNA binding;GO:0006351//transcription, DNA-templated;GO:0009536//plastid;GO:0009507//chloroplast
Unigene36446_All	669	ko01100//Metabolic pathways;ko00940//Phenylpropanoid biosynthesis;ko03020//RNA polymerase;ko01110//Biosynthesis of secondary metabolites	Genetic Information Processing;Metabolism	Biosynthesis of other secondary metabolites;Transcription;Global and overview maps	-3.35633	7.84911e-07	4.04117e-07	K03006//DNA-directed RNA polymerase II subunit RPB1 [EC:2.7.7.6]+ko03020//RNA polymerase;K00430//peroxidase [EC:1.11.1.7]+ko01100//Metabolic pathways+ko01110//Biosynthesis of secondary metabolites+ko00940//Phenylpropanoid biosynthesis;K11793//cereblon;K00430//peroxidase [EC:1.11.1.7]+ko01100//Metabolic pathways+ko01110//Biosynthesis of secondary metabolites+ko00940//Phenylpropanoid biosynthesis	ATP-dependent protease La (LON) substrate-binding domain		Os09g0273701, partial [Oryza sativa Japonica Group]	[Z] KOG3592 Microtubule-associated proteins	Vegetative cell wall protein gp1 OS=Chlamydomonas reinhardtii GN=GP1 PE=1 SV=1
Unigene9587_All	2327	ko03010//Ribosome;ko03020//RNA polymerase	Genetic Information Processing	Transcription;Translation	-3.45256	1.26825e-22	2.9576e-23	K03046//DNA-directed RNA polymerase subunit beta' [EC:2.7.7.6]+ko03020//RNA polymerase;K02948//small subunit ribosomal protein S11+ko03010//Ribosome		KT305105.1 Trachelomonas sp. Jilnal030207BT small subunit ribosomal RNA gene, partial sequence; chloroplast	PREDICTED: uncharacterized protein LOC107949870 [Gossypium hirsutum]			GO:0003676//nucleic acid binding
Unigene28815_All	2003	ko03020//RNA polymerase;ko03010//Ribosome	Genetic Information Processing	Transcription;Translation	-3.50896	9.56929e-155	5.66221e-156	K03046//DNA-directed RNA polymerase subunit beta' [EC:2.7.7.6]+ko03020//RNA polymerase;K02948//small subunit ribosomal protein S11+ko03010//Ribosome		KX284728.2 Rhodochaete parvula plastid, complete genome	hypothetical protein BVRB_035640 [Beta vulgaris subsp. vulgaris]
Unigene43134_All	1326	ko03020//RNA polymerase	Genetic Information Processing	Transcription	-3.70683	1.79065e-11	6.57908e-12	K03040//DNA-directed RNA polymerase subunit alpha [EC:2.7.7.6]+ko03020//RNA polymerase;K03040//DNA-directed RNA polymerase subunit alpha [EC:2.7.7.6]+ko03020//RNA polymerase;K03040//DNA-directed RNA polymerase subunit alpha [EC:2.7.7.6]+ko03020//RNA polymerase;K03040//DNA-directed RNA polymerase subunit alpha [EC:2.7.7.6]+ko03020//RNA polymerase;K03040//DNA-directed RNA polymerase subunit alpha […	Bacterial RNA polymerase, alpha chain C terminal domain		RNA polymerase alpha subunit (plastid) [Teleaulax amphioxeia] >AKP94697.1 RNA polymerase alpha subunit (plastid) [Teleaulax amphioxeia]	[J] KOG0408 Mitochondrial/chloroplast ribosomal protein S11	DNA-directed RNA polymerase subunit alpha OS=Pyropia yezoensis GN=rpoA PE=3 SV=1	GO:0003899//DNA-directed 5'-3' RNA polymerase activity;GO:0003677//DNA binding;GO:0006351//transcription, DNA-templated;GO:0009536//plastid;GO:0046983//protein dimerization activity;GO:0009507//chloroplast
CL4255.Contig1_All	844	ko03020//RNA polymerase	Genetic Information Processing	Transcription	-3.73484	1.6663e-06	8.83947e-07	K03046//DNA-directed RNA polymerase subunit beta' [EC:2.7.7.6]+ko03020//RNA polymerase;K03046//DNA-directed RNA polymerase subunit beta' [EC:2.7.7.6]+ko03020//RNA polymerase;K03046//DNA-directed RNA polymerase subunit beta' [EC:2.7.7.6]+ko03020//RNA polymerase;K03046//DNA-directed RNA polymerase subunit beta' [EC:2.7.7.6]+ko03020//RNA polymerase;K03046//DNA-directed RNA polymerase subunit beta' […	RNA polymerase Rpb1, domain 1		RNA polymerase beta' chain [Rhodomonas salina] >A6MVX3.1 RecName: Full=DNA-directed RNA polymerase subunit beta'; AltName: Full=PEP; AltName: Full=Plastid-encoded RNA polymerase subunit beta'; Short=RNA polymerase subunit beta' >ABO70812.1 RNA polymerase beta' chain (chloroplast) [Rhodomonas salina]	[K] KOG0260 RNA polymerase II, large subunit	DNA-directed RNA polymerase subunit beta' OS=Rhodomonas salina GN=rpoC1 PE=3 SV=1	GO:0003899//DNA-directed 5'-3' RNA polymerase activity;GO:0003677//DNA binding;GO:0006351//transcription, DNA-templated;GO:0009536//plastid;GO:0009507//chloroplast
Unigene64937_All	415	ko03020//RNA polymerase	Genetic Information Processing	Transcription	-3.73484	0.00067943	0.000508884	K03043//DNA-directed RNA polymerase subunit beta [EC:2.7.7.6]+ko03020//RNA polymerase;K03046//DNA-directed RNA polymerase subunit beta' [EC:2.7.7.6]+ko03020//RNA polymerase;K03043//DNA-directed RNA polymerase subunit beta [EC:2.7.7.6]+ko03020//RNA polymerase;K03043//DNA-directed RNA polymerase subunit beta [EC:2.7.7.6]+ko03020//RNA polymerase;K03043//DNA-directed RNA polymerase subunit beta [EC:2…	RNA polymerase Rpb2, domain 3		RNA polymerase beta subunit (chloroplast) [Guillardia theta]	[K] KOG0214 RNA polymerase II, second largest subunit	DNA-directed RNA polymerase subunit beta OS=Rhodomonas salina GN=rpoB PE=3 SV=1	GO:0003899//DNA-directed 5'-3' RNA polymerase activity;GO:0032549//ribonucleoside binding;GO:0003677//DNA binding;GO:0006351//transcription, DNA-templated;GO:0009507//chloroplast
Unigene16027_All	3663	ko03020//RNA polymerase	Genetic Information Processing	Transcription	-3.7515	1.67294e-155	9.872e-157	K02184//formin 2;K03006//DNA-directed RNA polymerase II subunit RPB1 [EC:2.7.7.6]+ko03020//RNA polymerase;K19984//exocyst complex component 5;K02184//formin 2	Fungal Zn(2)-Cys(6) binuclear cluster domain		formin-like protein 18 [Aegilops tauschii subsp. tauschii]	[M] LSE0601 A Pollen extensin-like protein (Pex)	Leucine-rich repeat extensin-like protein 5 OS=Arabidopsis thaliana GN=LRX5 PE=2 SV=2
Unigene13331_All	1967	ko03010//Ribosome;ko03020//RNA polymerase	Genetic Information Processing	Translation;Transcription	-3.81981	5.53351e-84	5.10942e-85	K03046//DNA-directed RNA polymerase subunit beta' [EC:2.7.7.6]+ko03020//RNA polymerase;K02948//small subunit ribosomal protein S11+ko03010//Ribosome		KX284728.2 Rhodochaete parvula plastid, complete genome	PREDICTED: uncharacterized protein LOC107949870 [Gossypium hirsutum]			GO:0005739//mitochondrion;GO:0003676//nucleic acid binding
Unigene70249_All	642	ko03020//RNA polymerase	Genetic Information Processing	Transcription	-3.84176	0.000376731	0.000270104	K03043//DNA-directed RNA polymerase subunit beta [EC:2.7.7.6]+ko03020//RNA polymerase;K03046//DNA-directed RNA polymerase subunit beta' [EC:2.7.7.6]+ko03020//RNA polymerase;K03043//DNA-directed RNA polymerase subunit beta [EC:2.7.7.6]+ko03020//RNA polymerase;K03043//DNA-directed RNA polymerase subunit beta [EC:2.7.7.6]+ko03020//RNA polymerase	RNA polymerase Rpb2, domain 6		hypothetical protein BVRB_026110, partial [Beta vulgaris subsp. vulgaris]	[K] KOG0214 RNA polymerase II, second largest subunit	DNA-directed RNA polymerase subunit beta OS=Guillardia theta GN=rpoB PE=3 SV=1	GO:0003899//DNA-directed 5'-3' RNA polymerase activity;GO:0032549//ribonucleoside binding;GO:0003677//DNA binding;GO:0006351//transcription, DNA-templated;GO:0009536//plastid;GO:0009507//chloroplast
Unigene76876_All	1539	ko03020//RNA polymerase;ko03010//Ribosome	Genetic Information Processing	Translation;Transcription	-3.86618	1.60626e-102	1.28932e-103	K03046//DNA-directed RNA polymerase subunit beta' [EC:2.7.7.6]+ko03020//RNA polymerase;K02948//small subunit ribosomal protein S11+ko03010//Ribosome		KJ410683.1 Nannochloropsis oceanica strain LAMB0001 chloroplast, partial genome	unknow protein [Oryza sativa Japonica Group]
Unigene12420_All	982	ko03020//RNA polymerase	Genetic Information Processing	Transcription	-3.88382	2.23812e-138	1.4499e-139	K03046//DNA-directed RNA polymerase subunit beta' [EC:2.7.7.6]+ko03020//RNA polymerase		EU600086.1 Pueraria montana var. lobata 16S ribosomal RNA gene, partial sequence	hypothetical protein BVRB_033340, partial [Beta vulgaris subsp. vulgaris]
CL8211.Contig1_All	3109	ko03020//RNA polymerase	Genetic Information Processing	Transcription	-3.963	7.37798e-62	8.52346e-63	K03046//DNA-directed RNA polymerase subunit beta' [EC:2.7.7.6]+ko03020//RNA polymerase;K03043//DNA-directed RNA polymerase subunit beta [EC:2.7.7.6]+ko03020//RNA polymerase;K03043//DNA-directed RNA polymerase subunit beta [EC:2.7.7.6]+ko03020//RNA polymerase;K03043//DNA-directed RNA polymerase subunit beta [EC:2.7.7.6]+ko03020//RNA polymerase;K03043//DNA-directed RNA polymerase subunit beta [EC:2…	RNA polymerase Rpb2, domain 6		DNA-directed RNA polymerase beta subunit (chromatophore) [Paulinella chromatophora] >ACB42549.1 DNA-directed RNA polymerase beta subunit (chromatophore) [Paulinella chromatophora]	[K] KOG0214 RNA polymerase II, second largest subunit	DNA-directed RNA polymerase subunit beta OS=Porphyra purpurea GN=rpoB PE=3 SV=1	GO:0003899//DNA-directed 5'-3' RNA polymerase activity;GO:0032549//ribonucleoside binding;GO:0003677//DNA binding;GO:0006351//transcription, DNA-templated;GO:0009536//plastid;GO:0009507//chloroplast
CL7068.Contig1_All	1026	ko03020//RNA polymerase	Genetic Information Processing	Transcription	-3.9886	8.7028e-08	4.11471e-08	K03046//DNA-directed RNA polymerase subunit beta' [EC:2.7.7.6]+ko03020//RNA polymerase;K03046//DNA-directed RNA polymerase subunit beta' [EC:2.7.7.6]+ko03020//RNA polymerase;K03046//DNA-directed RNA polymerase subunit beta' [EC:2.7.7.6]+ko03020//RNA polymerase;K03046//DNA-directed RNA polymerase subunit beta' [EC:2.7.7.6]+ko03020//RNA polymerase;K03046//DNA-directed RNA polymerase subunit beta' […	RNA polymerase Rpb1, domain 5		RNA polymerase beta'' subunit (chloroplast) [Guillardia theta]	[K] KOG0261 RNA polymerase III, large subunit	DNA-directed RNA polymerase subunit beta'' OS=Rhodomonas salina GN=rpoC2 PE=3 SV=1	GO:0003899//DNA-directed 5'-3' RNA polymerase activity;GO:0003677//DNA binding;GO:0006351//transcription, DNA-templated;GO:0009507//chloroplast
Unigene14894_All	1707	ko03020//RNA polymerase;ko03010//Ribosome	Genetic Information Processing	Transcription;Translation	-4.08174	8.27356e-188	4.16835e-189	K03046//DNA-directed RNA polymerase subunit beta' [EC:2.7.7.6]+ko03020//RNA polymerase;K02948//small subunit ribosomal protein S11+ko03010//Ribosome		KR020505.1 Wildemania schizophylla voucher UC 306400 plastid, complete genome	hypothetical protein (mitochondrion) [Vicia faba]
Unigene19978_All	1007	ko03020//RNA polymerase;ko03010//Ribosome	Genetic Information Processing	Translation;Transcription	-4.10479	3.21523e-19	8.3807e-20	K02952//small subunit ribosomal protein S13+ko03010//Ribosome;K02952//small subunit ribosomal protein S13+ko03010//Ribosome;K02952//small subunit ribosomal protein S13+ko03010//Ribosome;K03040//DNA-directed RNA polymerase subunit alpha [EC:2.7.7.6]+ko03020//RNA polymerase;K02952//small subunit ribosomal protein S13+ko03010//Ribosome	Ribosomal protein S13/S18	JX595069.1 Gossypium hirsutum clone NBRI_GE31217 microsatellite sequence	ribosomal protein S13 (cyanelle) [Cyanophora paradoxa]	[J] KOG0408 Mitochondrial/chloroplast ribosomal protein S11	Cyanelle 30S ribosomal protein S13 OS=Cyanophora paradoxa GN=rps13 PE=3 SV=1	GO:0005840//ribosome;GO:0006412//translation;GO:0003735//structural constituent of ribosome;GO:0009536//plastid;GO:0009842//cyanelle;GO:0019843//rRNA binding;GO:0009507//chloroplast
Unigene65709_All	529	ko03020//RNA polymerase	Genetic Information Processing	Transcription	-4.49384	0.000965735	0.000743173	K03043//DNA-directed RNA polymerase subunit beta [EC:2.7.7.6]+ko03020//RNA polymerase	RNA polymerase Rpb2, domain 2		RNA polymerase beta subunit (cyanelle) [Cyanophora paradoxa]		DNA-directed RNA polymerase subunit beta OS=Cyanidioschyzon merolae (strain 10D) GN=rpoB PE=3 SV=1	GO:0003899//DNA-directed 5'-3' RNA polymerase activity;GO:0032549//ribonucleoside binding;GO:0003677//DNA binding;GO:0006351//transcription, DNA-templated;GO:0009842//cyanelle;GO:0009507//chloroplast
Unigene76404_All	301	ko03020//RNA polymerase	Genetic Information Processing	Transcription	-4.49384	0.000965735	0.000743173	K03043//DNA-directed RNA polymerase subunit beta [EC:2.7.7.6]+ko03020//RNA polymerase;K03046//DNA-directed RNA polymerase subunit beta' [EC:2.7.7.6]+ko03020//RNA polymerase;K03043//DNA-directed RNA polymerase subunit beta [EC:2.7.7.6]+ko03020//RNA polymerase;K03043//DNA-directed RNA polymerase subunit beta [EC:2.7.7.6]+ko03020//RNA polymerase	RNA polymerase Rpb2, domain 6		beta subunit of RNA polymerase (chloroplast) [Volvox carteri] >ACY06066.1 beta subunit of RNA polymerase (plastid) [Volvox carteri f. nagariensis]	[K] KOG0214 RNA polymerase II, second largest subunit	DNA-directed RNA polymerase subunit beta C-terminal section OS=Chlamydomonas reinhardtii GN=rpoB2 PE=2 SV=1	GO:0003899//DNA-directed 5'-3' RNA polymerase activity;GO:0032549//ribonucleoside binding;GO:0003677//DNA binding;GO:0006351//transcription, DNA-templated;GO:0009536//plastid;GO:0009507//chloroplast
Unigene86812_All	575	ko03020//RNA polymerase	Genetic Information Processing	Transcription	-4.49384	0.000965735	0.000743173	K03163//DNA topoisomerase I [EC:5.99.1.2];K03006//DNA-directed RNA polymerase II subunit RPB1 [EC:2.7.7.6]+ko03020//RNA polymerase;K04733//interleukin-1 receptor-associated kinase 4 [EC:2.7.11.1];K04733//interleukin-1 receptor-associated kinase 4 [EC:2.7.11.1]			similar to hedgehog protein [Cyanidioschyzon merolae strain 10D] >BAM79537.1 similar to hedgehog protein [Cyanidioschyzon merolae strain 10D]	[Q] KOG1285 Beta, beta-carotene 15,15'-dioxygenase and related enzymes	Proline-rich receptor-like protein kinase PERK1 OS=Arabidopsis thaliana GN=PERK1 PE=2 SV=1	GO:0016539//intein-mediated protein splicing;GO:0008233//peptidase activity;GO:0016021//integral component of membrane
Unigene62577_All	614	ko03020//RNA polymerase	Genetic Information Processing	Transcription	-4.61937	0.000536232	0.000394685	K03006//DNA-directed RNA polymerase II subunit RPB1 [EC:2.7.7.6]+ko03020//RNA polymerase			autotransporter beta domain-containing protein [Ostreococcus tauri]	[WV] KOG1216 von Willebrand factor and related coagulation proteins
Unigene65571_All	350	ko03020//RNA polymerase	Genetic Information Processing	Transcription	-4.61937	0.000536232	0.000394685	K03046//DNA-directed RNA polymerase subunit beta' [EC:2.7.7.6]+ko03020//RNA polymerase;K03043//DNA-directed RNA polymerase subunit beta [EC:2.7.7.6]+ko03020//RNA polymerase;K03043//DNA-directed RNA polymerase subunit beta [EC:2.7.7.6]+ko03020//RNA polymerase;K03043//DNA-directed RNA polymerase subunit beta [EC:2.7.7.6]+ko03020//RNA polymerase;K03043//DNA-directed RNA polymerase subunit beta [EC:2…	RNA polymerase Rpb2, domain 2		RNA polymerase beta subunit, partial [Rhododendron catawbiense]	[K] KOG0214 RNA polymerase II, second largest subunit	DNA-directed RNA polymerase subunit beta OS=Mesostigma viride GN=rpoB PE=3 SV=1	GO:0003899//DNA-directed 5'-3' RNA polymerase activity;GO:0032549//ribonucleoside binding;GO:0003677//DNA binding;GO:0006351//transcription, DNA-templated;GO:0009536//plastid;GO:0009507//chloroplast
Unigene41424_All	1509	ko03020//RNA polymerase	Genetic Information Processing	Transcription	-4.73484	2.38974e-263	9.20414e-265	K02184//formin 2;K03006//DNA-directed RNA polymerase II subunit RPB1 [EC:2.7.7.6]+ko03020//RNA polymerase;K03006//DNA-directed RNA polymerase II subunit RPB1 [EC:2.7.7.6]+ko03020//RNA polymerase	HD domain		hypothetical protein BU14_0249s0013 [Porphyra umbilicalis]	[K] KOG0260 RNA polymerase II, large subunit	Probable GTP diphosphokinase CRSH2, chloroplastic OS=Oryza sativa subsp. japonica GN=CRSH2 PE=2 SV=1
Unigene57457_All	401	ko03020//RNA polymerase	Genetic Information Processing	Transcription	-4.73484	0.000298398	0.000210881	K03043//DNA-directed RNA polymerase subunit beta [EC:2.7.7.6]+ko03020//RNA polymerase;K03046//DNA-directed RNA polymerase subunit beta' [EC:2.7.7.6]+ko03020//RNA polymerase;K03043//DNA-directed RNA polymerase subunit beta [EC:2.7.7.6]+ko03020//RNA polymerase;K03043//DNA-directed RNA polymerase subunit beta [EC:2.7.7.6]+ko03020//RNA polymerase;K03043//DNA-directed RNA polymerase subunit beta [EC:2…	RNA polymerase Rpb2, domain 6	KT367484.1 Orobanche rapum-genistae clone Orap-c2889 genomic sequence	plastid-encoded DNA-directed RNA polymerase (chloroplast) [Flintiella sanguinaria]	[K] KOG0214 RNA polymerase II, second largest subunit	DNA-directed RNA polymerase subunit beta OS=Guillardia theta GN=rpoB PE=3 SV=1	GO:0003899//DNA-directed 5'-3' RNA polymerase activity;GO:0032549//ribonucleoside binding;GO:0003677//DNA binding;GO:0006351//transcription, DNA-templated;GO:0009536//plastid;GO:0009507//chloroplast
Unigene86332_All	676	ko03020//RNA polymerase	Genetic Information Processing	Transcription	-4.84176	0.000167012	0.00011332	K03006//DNA-directed RNA polymerase II subunit RPB1 [EC:2.7.7.6]+ko03020//RNA polymerase;K17987//next to BRCA1 gene 1 protein;K03006//DNA-directed RNA polymerase II subunit RPB1 [EC:2.7.7.6]+ko03020//RNA polymerase;K04733//interleukin-1 receptor-associated kinase 4 [EC:2.7.11.1];K04733//interleukin-1 receptor-associated kinase 4 [EC:2.7.11.1]			similar to hedgehog protein [Cyanidioschyzon merolae strain 10D] >BAM79403.1 similar to hedgehog protein [Cyanidioschyzon merolae strain 10D]	[WV] KOG1216 von Willebrand factor and related coagulation proteins	Proline-rich receptor-like protein kinase PERK2 OS=Arabidopsis thaliana GN=PERK2 PE=2 SV=3	GO:0016539//intein-mediated protein splicing;GO:0008233//peptidase activity;GO:0016021//integral component of membrane
Unigene85401_All	1301	ko03020//RNA polymerase	Genetic Information Processing	Transcription	-4.87436	0.000139072	9.30023e-05	K18749//protein LSM14;K03006//DNA-directed RNA polymerase II subunit RPB1 [EC:2.7.7.6]+ko03020//RNA polymerase;K10990//RecQ-mediated genome instability protein 1;K03006//DNA-directed RNA polymerase II subunit RPB1 [EC:2.7.7.6]+ko03020//RNA polymerase	PT repeat		hypothetical protein SDRG_04536 [Saprolegnia diclina VS20] >EQC38106.1 hypothetical protein SDRG_04536 [Saprolegnia diclina VS20]	[T] KOG4743 Cyclin-dependent kinase inhibitor	Classical arabinogalactan protein 10 OS=Arabidopsis thaliana GN=AGP10 PE=1 SV=1	GO:0046872//metal ion binding;GO:0016491//oxidoreductase activity
Unigene50409_All	1551	ko03020//RNA polymerase	Genetic Information Processing	Transcription	-4.8864	0.000129676	8.63726e-05	K03046//DNA-directed RNA polymerase subunit beta' [EC:2.7.7.6]+ko03020//RNA polymerase		KT305103.1 Trachelomonas sp. Jakeun052407A small subunit ribosomal RNA gene, partial sequence; chloroplast	ORF58e [Pinus koraiensis] >ABP35448.1 ORF58e (chloroplast) [Pinus koraiensis]			GO:0009507//chloroplast
CL4049.Contig2_All	644	ko03020//RNA polymerase	Genetic Information Processing	Transcription	-4.9413	9.37088e-05	6.12248e-05	K03006//DNA-directed RNA polymerase II subunit RPB1 [EC:2.7.7.6]+ko03020//RNA polymerase;K03006//DNA-directed RNA polymerase II subunit RPB1 [EC:2.7.7.6]+ko03020//RNA polymerase;K03006//DNA-directed RNA polymerase II subunit RPB1 [EC:2.7.7.6]+ko03020//RNA polymerase;K18749//protein LSM14;K03006//DNA-directed RNA polymerase II subunit RPB1 [EC:2.7.7.6]+ko03020//RNA polymerase			vegetative cell wall protein gp1-like, partial [Ananas comosus]	[K] KOG2341 TATA box binding protein (TBP)-associated factor, RNA polymerase II		GO:0004674//protein serine/threonine kinase activity;GO:0005524//ATP binding;GO:0016021//integral component of membrane
Unigene25220_All	408	ko03020//RNA polymerase	Genetic Information Processing	Transcription	-4.9413	9.37088e-05	6.12248e-05	K03046//DNA-directed RNA polymerase subunit beta' [EC:2.7.7.6]+ko03020//RNA polymerase;K03046//DNA-directed RNA polymerase subunit beta' [EC:2.7.7.6]+ko03020//RNA polymerase;K03046//DNA-directed RNA polymerase subunit beta' [EC:2.7.7.6]+ko03020//RNA polymerase;K03046//DNA-directed RNA polymerase subunit beta' [EC:2.7.7.6]+ko03020//RNA polymerase	RNA polymerase Rpb1, domain 5		DNA-directed RNA polymerase beta' subunit (chromatophore) [Paulinella chromatophora] >B1X3M8.1 RecName: Full=DNA-directed RNA polymerase subunit beta''; AltName: Full=DNA-directed RNA polymerase subunit beta'; Short=RNAP subunit beta'; AltName: Full=PEP; AltName: Full=Plastid-encoded RNA polymerase subunit beta''; Short=RNA polymerase subunit beta''; AltName: Full=RNA polymerase subunit beta'; Al…	[K] KOG0261 RNA polymerase III, large subunit	DNA-directed RNA polymerase subunit beta'' OS=Tetradesmus obliquus GN=rpoC2 PE=3 SV=1	GO:0003899//DNA-directed 5'-3' RNA polymerase activity;GO:0003677//DNA binding;GO:0006351//transcription, DNA-templated;GO:0009536//plastid;GO:0070111//organellar chromatophore;GO:0009507//chloroplast
CL4237.Contig1_All	1098	ko03020//RNA polymerase	Genetic Information Processing	Transcription	-4.97269	7.76451e-05	5.00252e-05	K01180//endo-1,3(4)-beta-glucanase [EC:3.2.1.6];K03006//DNA-directed RNA polymerase II subunit RPB1 [EC:2.7.7.6]+ko03020//RNA polymerase;K03006//DNA-directed RNA polymerase II subunit RPB1 [EC:2.7.7.6]+ko03020//RNA polymerase	Eukaryotic aspartyl protease		minus agglutinin [Chlamydomonas reinhardtii]	[T] KOG1187 Serine/threonine protein kinase	Proline-rich receptor-like protein kinase PERK8 OS=Arabidopsis thaliana GN=PERK8 PE=1 SV=1
Unigene88268_All	670	ko01110//Biosynthesis of secondary metabolites;ko01100//Metabolic pathways;ko00940//Phenylpropanoid biosynthesis;ko03020//RNA polymerase	Metabolism;Genetic Information Processing	Global and overview maps;Biosynthesis of other secondary metabolites;Transcription	-5.0344	5.26998e-05	3.32497e-05	K03006//DNA-directed RNA polymerase II subunit RPB1 [EC:2.7.7.6]+ko03020//RNA polymerase;K04733//interleukin-1 receptor-associated kinase 4 [EC:2.7.11.1];K00430//peroxidase [EC:1.11.1.7]+ko01100//Metabolic pathways+ko01110//Biosynthesis of secondary metabolites+ko00940//Phenylpropanoid biosynthesis;K04733//interleukin-1 receptor-associated kinase 4 [EC:2.7.11.1];K00430//peroxidase [EC:1.11.1.7]+k…	R3H domain		acid ceramidase-like protein [Chrysochromulina sp. CCMP291]	[GO] KOG4157 beta-1,6-N-acetylglucosaminyltransferase, contains WSC domain	Protein TIC 214 OS=Cucumis sativus GN=TIC214 PE=3 SV=2	GO:0016539//intein-mediated protein splicing;GO:0008233//peptidase activity
Unigene63838_All	1257	ko03020//RNA polymerase	Genetic Information Processing	Transcription	-5.16369	1.79121e-09	7.45766e-10	K03046//DNA-directed RNA polymerase subunit beta' [EC:2.7.7.6]+ko03020//RNA polymerase;K03043//DNA-directed RNA polymerase subunit beta [EC:2.7.7.6]+ko03020//RNA polymerase;K03043//DNA-directed RNA polymerase subunit beta [EC:2.7.7.6]+ko03020//RNA polymerase;K03043//DNA-directed RNA polymerase subunit beta [EC:2.7.7.6]+ko03020//RNA polymerase;K03043//DNA-directed RNA polymerase subunit beta [EC:2…	RNA polymerase Rpb2, domain 6		DNA-directed RNA polymerase beta subunit (chromatophore) [Paulinella chromatophora] >ACB42549.1 DNA-directed RNA polymerase beta subunit (chromatophore) [Paulinella chromatophora]	[K] KOG0214 RNA polymerase II, second largest subunit	DNA-directed RNA polymerase subunit beta OS=Rhodomonas salina GN=rpoB PE=3 SV=1	GO:0003899//DNA-directed 5'-3' RNA polymerase activity;GO:0032549//ribonucleoside binding;GO:0003677//DNA binding;GO:0006351//transcription, DNA-templated;GO:0009536//plastid;GO:0009507//chloroplast
Unigene87280_All	832	ko03020//RNA polymerase	Genetic Information Processing	Transcription	-5.20433	1.67523e-05	9.94983e-06	K03006//DNA-directed RNA polymerase II subunit RPB1 [EC:2.7.7.6]+ko03020//RNA polymerase;K03006//DNA-directed RNA polymerase II subunit RPB1 [EC:2.7.7.6]+ko03020//RNA polymerase;K03006//DNA-directed RNA polymerase II subunit RPB1 [EC:2.7.7.6]+ko03020//RNA polymerase;K03006//DNA-directed RNA polymerase II subunit RPB1 [EC:2.7.7.6]+ko03020//RNA polymerase;K03006//DNA-directed RNA polymerase II subu…	Bacteriophage FRD3 protein		leucine-rich repeat extensin-like protein 1 [Helianthus annuus] >OTF91358.1 putative root cap [Helianthus annuus]	[M] LSE0601 A Pollen extensin-like protein (Pex)	Proline-rich receptor-like protein kinase PERK8 OS=Arabidopsis thaliana GN=PERK8 PE=1 SV=1
Unigene69358_All	788	ko01100//Metabolic pathways;ko03015//mRNA surveillance pathway;ko03020//RNA polymerase;ko01110//Biosynthesis of secondary metabolites;ko03040//Spliceosome;ko00940//Phenylpropanoid biosynthesis;ko03013//RNA transport	Metabolism;Genetic Information Processing	Transcription;Biosynthesis of other secondary metabolites;Translation;Global and overview maps	-5.28233	9.50308e-06	5.48026e-06	K12900//FUS-interacting serine-arginine-rich protein 1+ko03040//Spliceosome;K00430//peroxidase [EC:1.11.1.7]+ko01100//Metabolic pathways+ko01110//Biosynthesis of secondary metabolites+ko00940//Phenylpropanoid biosynthesis;K03006//DNA-directed RNA polymerase II subunit RPB1 [EC:2.7.7.6]+ko03020//RNA polymerase;K13171//serine/arginine repetitive matrix protein 1+ko03015//mRNA surveillance pathway+k…	Binding-protein-dependent transport system inner membrane component		hypothetical protein BU14_0085s0029, partial [Porphyra umbilicalis]	[AR] KOG2146 Splicing coactivator SRm160/300, subunit SRm160 (contains PWI domain)	Vegetative cell wall protein gp1 OS=Chlamydomonas reinhardtii GN=GP1 PE=1 SV=1	GO:0016021//integral component of membrane
Unigene87509_All	693	ko03020//RNA polymerase	Genetic Information Processing	Transcription	-5.28233	9.50308e-06	5.48026e-06	K03006//DNA-directed RNA polymerase II subunit RPB1 [EC:2.7.7.6]+ko03020//RNA polymerase;K03006//DNA-directed RNA polymerase II subunit RPB1 [EC:2.7.7.6]+ko03020//RNA polymerase;K03006//DNA-directed RNA polymerase II subunit RPB1 [EC:2.7.7.6]+ko03020//RNA polymerase;K03006//DNA-directed RNA polymerase II subunit RPB1 [EC:2.7.7.6]+ko03020//RNA polymerase;K03006//DNA-directed RNA polymerase II subu…			hypothetical protein DCAR_007215 [Daucus carota subsp. sativus]	[K] KOG0260 RNA polymerase II, large subunit	Proline-rich receptor-like protein kinase PERK2 OS=Arabidopsis thaliana GN=PERK2 PE=2 SV=3	GO:0003899//DNA-directed 5'-3' RNA polymerase activity;GO:0005665//DNA-directed RNA polymerase II, core complex;GO:0003677//DNA binding;GO:0006366//transcription from RNA polymerase II promoter
CL1594.Contig2_All	1326	ko03020//RNA polymerase	Genetic Information Processing	Transcription	-5.40751	0.00063889	0.00047514	K03046//DNA-directed RNA polymerase subunit beta' [EC:2.7.7.6]+ko03020//RNA polymerase;K03043//DNA-directed RNA polymerase subunit beta [EC:2.7.7.6]+ko03020//RNA polymerase;K03043//DNA-directed RNA polymerase subunit beta [EC:2.7.7.6]+ko03020//RNA polymerase;K03043//DNA-directed RNA polymerase subunit beta [EC:2.7.7.6]+ko03020//RNA polymerase;K03043//DNA-directed RNA polymerase subunit beta [EC:2…	RNA polymerase Rpb2, domain 6		two component transcriptional regulator (chloroplast) [Calliarthron tuberculosum] >AGA63878.1 two component transcriptional regulator (chloroplast) [Calliarthron tuberculosum]	[K] KOG0214 RNA polymerase II, second largest subunit	DNA-directed RNA polymerase subunit beta OS=Pyropia yezoensis GN=rpoB PE=3 SV=1	GO:0003899//DNA-directed 5'-3' RNA polymerase activity;GO:0032549//ribonucleoside binding;GO:0003677//DNA binding;GO:0006351//transcription, DNA-templated;GO:0009536//plastid;GO:0009507//chloroplast
Unigene86491_All	604	ko01100//Metabolic pathways;ko03020//RNA polymerase;ko00940//Phenylpropanoid biosynthesis;ko01110//Biosynthesis of secondary metabolites	Genetic Information Processing;Metabolism	Global and overview maps;Transcription;Biosynthesis of other secondary metabolites	-5.49384	1.76295e-06	9.3908e-07	K00430//peroxidase [EC:1.11.1.7]+ko01100//Metabolic pathways+ko01110//Biosynthesis of secondary metabolites+ko00940//Phenylpropanoid biosynthesis;K03006//DNA-directed RNA polymerase II subunit RPB1 [EC:2.7.7.6]+ko03020//RNA polymerase;K00430//peroxidase [EC:1.11.1.7]+ko01100//Metabolic pathways+ko01110//Biosynthesis of secondary metabolites+ko00940//Phenylpropanoid biosynthesis;K00430//peroxidase…	Conotoxin		hypothetical protein GUITHDRAFT_119564 [Guillardia theta CCMP2712] >EKX34274.1 hypothetical protein GUITHDRAFT_119564 [Guillardia theta CCMP2712]	[WV] KOG1216 von Willebrand factor and related coagulation proteins	Vegetative cell wall protein gp1 OS=Chlamydomonas reinhardtii GN=GP1 PE=1 SV=1	GO:0004252//serine-type endopeptidase activity
Unigene87278_All	655	ko03020//RNA polymerase	Genetic Information Processing	Transcription	-5.49384	1.76295e-06	9.3908e-07	K03006//DNA-directed RNA polymerase II subunit RPB1 [EC:2.7.7.6]+ko03020//RNA polymerase;K03006//DNA-directed RNA polymerase II subunit RPB1 [EC:2.7.7.6]+ko03020//RNA polymerase;K03006//DNA-directed RNA polymerase II subunit RPB1 [EC:2.7.7.6]+ko03020//RNA polymerase;K04730//interleukin-1 receptor-associated kinase 1 [EC:2.7.11.1]			hypothetical protein POPTR_0009s10030g [Populus trichocarpa] >EEE87821.2 hypothetical protein POPTR_0009s10030g [Populus trichocarpa]	[E] KOG3627 Trypsin	Proline-rich receptor-like protein kinase PERK12 OS=Arabidopsis thaliana GN=PERK12 PE=2 SV=2	GO:0004252//serine-type endopeptidase activity
CL4206.Contig1_All	1241	ko03020//RNA polymerase	Genetic Information Processing	Transcription	-5.61455	6.06829e-07	3.09306e-07	K03046//DNA-directed RNA polymerase subunit beta' [EC:2.7.7.6]+ko03020//RNA polymerase;K03046//DNA-directed RNA polymerase subunit beta' [EC:2.7.7.6]+ko03020//RNA polymerase;K03046//DNA-directed RNA polymerase subunit beta' [EC:2.7.7.6]+ko03020//RNA polymerase;K03046//DNA-directed RNA polymerase subunit beta' [EC:2.7.7.6]+ko03020//RNA polymerase;K03046//DNA-directed RNA polymerase subunit beta' […	RNA polymerase Rpb1, domain 5		RNA polymerase beta'' subunit (plastid) [Storeatula sp. CCMP1868]		DNA-directed RNA polymerase subunit beta'' OS=Rhodomonas salina GN=rpoC2 PE=3 SV=1	GO:0003899//DNA-directed 5'-3' RNA polymerase activity;GO:0003677//DNA binding;GO:0006351//transcription, DNA-templated;GO:0009536//plastid;GO:0009507//chloroplast
Unigene32144_All	1072	ko03020//RNA polymerase;ko04144//Endocytosis	Cellular Processes;Genetic Information Processing	Transport and catabolism;Transcription	-6.01168	3.49468e-16	1.02794e-16	K05747//Wiskott-Aldrich syndrome protein+ko04144//Endocytosis;K10799//tankyrase [EC:2.4.2.30];K03006//DNA-directed RNA polymerase II subunit RPB1 [EC:2.7.7.6]+ko03020//RNA polymerase	DHHA2 domain		hypothetical protein AXX17_ATUG04880 [Arabidopsis thaliana]	[WV] KOG1216 von Willebrand factor and related coagulation proteins	Splicing factor U2af large subunit A OS=Triticum aestivum GN=U2AF65A PE=2 SV=1	GO:0016462//pyrophosphatase activity;GO:0005737//cytoplasm
Unigene86905_All	735	ko00940//Phenylpropanoid biosynthesis;ko01110//Biosynthesis of secondary metabolites;ko01100//Metabolic pathways;ko03020//RNA polymerase	Metabolism;Genetic Information Processing	Biosynthesis of other secondary metabolites;Transcription;Global and overview maps	-6.0344	7.59615e-09	3.30899e-09	K03006//DNA-directed RNA polymerase II subunit RPB1 [EC:2.7.7.6]+ko03020//RNA polymerase;K00430//peroxidase [EC:1.11.1.7]+ko01100//Metabolic pathways+ko01110//Biosynthesis of secondary metabolites+ko00940//Phenylpropanoid biosynthesis;K00430//peroxidase [EC:1.11.1.7]+ko01100//Metabolic pathways+ko01110//Biosynthesis of secondary metabolites+ko00940//Phenylpropanoid biosynthesis			leucine-rich repeat extensin-like protein 1 [Helianthus annuus] >OTF91358.1 putative root cap [Helianthus annuus]	[T] KOG1187 Serine/threonine protein kinase	Proline-rich receptor-like protein kinase PERK2 OS=Arabidopsis thaliana GN=PERK2 PE=2 SV=3	GO:0016539//intein-mediated protein splicing;GO:0008233//peptidase activity;GO:0016021//integral component of membrane
CL1331.Contig2_All	967	ko03020//RNA polymerase	Genetic Information Processing	Transcription	-6.07661	4.58527e-09	1.96606e-09	K03046//DNA-directed RNA polymerase subunit beta' [EC:2.7.7.6]+ko03020//RNA polymerase;K03046//DNA-directed RNA polymerase subunit beta' [EC:2.7.7.6]+ko03020//RNA polymerase;K03046//DNA-directed RNA polymerase subunit beta' [EC:2.7.7.6]+ko03020//RNA polymerase;K03046//DNA-directed RNA polymerase subunit beta' [EC:2.7.7.6]+ko03020//RNA polymerase;K03046//DNA-directed RNA polymerase subunit beta' […	RNA polymerase Rpb1, domain 2		RNA polymerase beta-subbunit (chloroplast) [Galaxaura rugosa] >SCW21757.1 RNA polymerase beta-subbunit (chloroplast) [Galaxaura rugosa]	[K] KOG0261 RNA polymerase III, large subunit	DNA-directed RNA polymerase subunit beta' OS=Porphyra purpurea GN=rpoC1 PE=3 SV=1	GO:0003899//DNA-directed 5'-3' RNA polymerase activity;GO:0003677//DNA binding;GO:0006351//transcription, DNA-templated;GO:0009536//plastid;GO:0009507//chloroplast
Unigene86389_All	613	ko03020//RNA polymerase	Genetic Information Processing	Transcription	-6.0788	4.46521e-09	1.91305e-09	K17987//next to BRCA1 gene 1 protein;K03006//DNA-directed RNA polymerase II subunit RPB1 [EC:2.7.7.6]+ko03020//RNA polymerase;K03006//DNA-directed RNA polymerase II subunit RPB1 [EC:2.7.7.6]+ko03020//RNA polymerase;K03006//DNA-directed RNA polymerase II subunit RPB1 [EC:2.7.7.6]+ko03020//RNA polymerase;K03006//DNA-directed RNA polymerase II subunit RPB1 [EC:2.7.7.6]+ko03020//RNA polymerase	Transglycosylase SLT domain		PREDICTED: protein NBR1 homolog isoform X1 [Lupinus angustifolius] >OIW00304.1 hypothetical protein TanjilG_27555 [Lupinus angustifolius]	[K] KOG0260 RNA polymerase II, large subunit	Lysine-rich arabinogalactan protein 19 OS=Arabidopsis thaliana GN=AGP19 PE=2 SV=2	GO:0005576//extracellular region;GO:0009405//pathogenesis
CL6114.Contig2_All	1281	ko03020//RNA polymerase	Genetic Information Processing	Transcription	-6.28233	3.23736e-10	1.28549e-10	K01180//endo-1,3(4)-beta-glucanase [EC:3.2.1.6];K03006//DNA-directed RNA polymerase II subunit RPB1 [EC:2.7.7.6]+ko03020//RNA polymerase;K03006//DNA-directed RNA polymerase II subunit RPB1 [EC:2.7.7.6]+ko03020//RNA polymerase	LBP / BPI / CETP family, C-terminal domain		similar to hedgehog protein [Cyanidioschyzon merolae strain 10D] >BAM79537.1 similar to hedgehog protein [Cyanidioschyzon merolae strain 10D]	[T] KOG1187 Serine/threonine protein kinase	Proline-rich receptor-like protein kinase PERK9 OS=Arabidopsis thaliana GN=PERK9 PE=1 SV=1	GO:0004252//serine-type endopeptidase activity;GO:0016539//intein-mediated protein splicing;GO:0008233//peptidase activity;GO:0016021//integral component of membrane
Unigene36156_All	857	ko03020//RNA polymerase	Genetic Information Processing	Transcription	-6.46067	2.47424e-11	9.17529e-12	K03040//DNA-directed RNA polymerase subunit alpha [EC:2.7.7.6]+ko03020//RNA polymerase;K03040//DNA-directed RNA polymerase subunit alpha [EC:2.7.7.6]+ko03020//RNA polymerase;K03040//DNA-directed RNA polymerase subunit alpha [EC:2.7.7.6]+ko03020//RNA polymerase;K03040//DNA-directed RNA polymerase subunit alpha [EC:2.7.7.6]+ko03020//RNA polymerase;K03040//DNA-directed RNA polymerase subunit alpha […	RNA polymerase Rpb3/Rpb11 dimerisation domain		RNA polymerase alpha subunit (plastid) [Cryptomonas curvata] >ASO75832.1 RNA polymerase alpha subunit (plastid) [Cryptomonas curvata]		DNA-directed RNA polymerase subunit alpha OS=Porphyra purpurea GN=rpoA PE=3 SV=1	GO:0005840//ribosome;GO:0003723//RNA binding;GO:0003677//DNA binding;GO:0006351//transcription, DNA-templated;GO:0046983//protein dimerization activity;GO:0003899//DNA-directed 5'-3' RNA polymerase activity;GO:0006412//translation;GO:0009536//plastid;GO:0003735//structural constituent of ribosome
CL6114.Contig1_All	1152	ko03013//RNA transport;ko03020//RNA polymerase	Genetic Information Processing	Transcription;Translation	-6.55797	5.40595e-12	1.93262e-12	K14306//nuclear pore complex protein Nup62+ko03013//RNA transport;K01180//endo-1,3(4)-beta-glucanase [EC:3.2.1.6];K04733//interleukin-1 receptor-associated kinase 4 [EC:2.7.11.1];K14306//nuclear pore complex protein Nup62+ko03013//RNA transport;K03006//DNA-directed RNA polymerase II subunit RPB1 [EC:2.7.7.6]+ko03020//RNA polymerase	LBP / BPI / CETP family, C-terminal domain		flocculation protein FLO11-like [Chenopodium quinoa]	[GO] KOG4157 beta-1,6-N-acetylglucosaminyltransferase, contains WSC domain	Proline-rich receptor-like protein kinase PERK1 OS=Arabidopsis thaliana GN=PERK1 PE=2 SV=1	GO:0004252//serine-type endopeptidase activity
CL6102.Contig1_All	2815	ko00940//Phenylpropanoid biosynthesis;ko01110//Biosynthesis of secondary metabolites;ko01100//Metabolic pathways;ko03020//RNA polymerase	Metabolism;Genetic Information Processing	Biosynthesis of other secondary metabolites;Global and overview maps;Transcription	-6.68787	9.88085e-153	5.93003e-154	K11855//ubiquitin carboxyl-terminal hydrolase 36/42 [EC:3.4.19.12];K00430//peroxidase [EC:1.11.1.7]+ko01100//Metabolic pathways+ko01110//Biosynthesis of secondary metabolites+ko00940//Phenylpropanoid biosynthesis;K03006//DNA-directed RNA polymerase II subunit RPB1 [EC:2.7.7.6]+ko03020//RNA polymerase	PT repeat		hypothetical protein FisN_10Hu218 [Fistulifera solaris]	[J] KOG2975 Translation initiation factor 3, subunit f (eIF-3f)	Non-classical arabinogalactan protein 30 OS=Arabidopsis thaliana GN=AGP30 PE=2 SV=1
Unigene11923_All	835	ko03020//RNA polymerase	Genetic Information Processing	Transcription	-6.71239	4.27963e-09	1.83096e-09	K02184//formin 2;K02184//formin 2;K03006//DNA-directed RNA polymerase II subunit RPB1 [EC:2.7.7.6]+ko03020//RNA polymerase	Aldehyde dehydrogenase family		formin-like protein 5 isoform X2 [Zea mays] >XP_008670539.1 formin-like protein 5 isoform X2 [Zea mays]		Formin-like protein 5 OS=Oryza sativa subsp. japonica GN=FH5 PE=2 SV=2
Unigene86666_All	1142	ko01110//Biosynthesis of secondary metabolites;ko00940//Phenylpropanoid biosynthesis;ko03020//RNA polymerase;ko01100//Metabolic pathways	Genetic Information Processing;Metabolism	Biosynthesis of other secondary metabolites;Global and overview maps;Transcription	-6.96514	3.37412e-15	1.03286e-15	K00430//peroxidase [EC:1.11.1.7]+ko01100//Metabolic pathways+ko01110//Biosynthesis of secondary metabolites+ko00940//Phenylpropanoid biosynthesis;K03006//DNA-directed RNA polymerase II subunit RPB1 [EC:2.7.7.6]+ko03020//RNA polymerase;K04733//interleukin-1 receptor-associated kinase 4 [EC:2.7.11.1];K14753//guanine nucleotide-binding protein subunit beta-2-like 1 protein	Anaphase-promoting complex subunit 4 WD40 domain		hypothetical protein POPTR_0009s10030g [Populus trichocarpa] >EEE87821.2 hypothetical protein POPTR_0009s10030g [Populus trichocarpa]	[Z] KOG3592 Microtubule-associated proteins	Extensin OS=Zea mays GN=HRGP PE=2 SV=1	GO:0016539//intein-mediated protein splicing;GO:0008233//peptidase activity;GO:0016021//integral component of membrane
CL2862.Contig1_All	1814	ko03013//RNA transport;ko03020//RNA polymerase	Genetic Information Processing	Transcription;Translation	-7.28556	2.68337e-18	7.24319e-19	K17987//next to BRCA1 gene 1 protein;K14306//nuclear pore complex protein Nup62+ko03013//RNA transport;K14306//nuclear pore complex protein Nup62+ko03013//RNA transport;K03006//DNA-directed RNA polymerase II subunit RPB1 [EC:2.7.7.6]+ko03020//RNA polymerase	Protein of unknown function (DUF996)		hypothetical protein L917_07986, partial [Phytophthora parasitica]	[GO] KOG4157 beta-1,6-N-acetylglucosaminyltransferase, contains WSC domain	Pectinesterase inhibitor 10 OS=Arabidopsis thaliana GN=PMEI10 PE=2 SV=1	GO:0007156//homophilic cell adhesion via plasma membrane adhesion molecules;GO:0005509//calcium ion binding;GO:0016021//integral component of membrane
Unigene87651_All	1278	ko03020//RNA polymerase	Genetic Information Processing	Transcription	-7.5422	3.24183e-21	7.89976e-22	K03006//DNA-directed RNA polymerase II subunit RPB1 [EC:2.7.7.6]+ko03020//RNA polymerase;K01180//endo-1,3(4)-beta-glucanase [EC:3.2.1.6];K03006//DNA-directed RNA polymerase II subunit RPB1 [EC:2.7.7.6]+ko03020//RNA polymerase	Cytosol aminopeptidase family, catalytic domain		vegetative cell wall protein [Chlamydomonas incerta]	[T] KOG1187 Serine/threonine protein kinase	Proline-rich receptor-like protein kinase PERK2 OS=Arabidopsis thaliana GN=PERK2 PE=2 SV=3
Unigene87741_All	1378	ko03020//RNA polymerase	Genetic Information Processing	Transcription	-7.5422	3.24183e-21	7.89976e-22	K03006//DNA-directed RNA polymerase II subunit RPB1 [EC:2.7.7.6]+ko03020//RNA polymerase;K01180//endo-1,3(4)-beta-glucanase [EC:3.2.1.6];K17987//next to BRCA1 gene 1 protein;K04733//interleukin-1 receptor-associated kinase 4 [EC:2.7.11.1]	Fatty acid desaturase		hypothetical protein COCSUDRAFT_13563 [Coccomyxa subellipsoidea C-169] >EIE25352.1 hypothetical protein COCSUDRAFT_13563 [Coccomyxa subellipsoidea C-169]	[T] LSE0513 C 7-transmembrane receptor	Lysine-rich arabinogalactan protein 19 OS=Arabidopsis thaliana GN=AGP19 PE=2 SV=2	GO:0004252//serine-type endopeptidase activity;GO:0016021//integral component of membrane;GO:0006629//lipid metabolic process
CL4237.Contig2_All	1364	ko03020//RNA polymerase	Genetic Information Processing	Transcription	-7.55278	2.40785e-21	5.83794e-22	K03006//DNA-directed RNA polymerase II subunit RPB1 [EC:2.7.7.6]+ko03020//RNA polymerase;K03006//DNA-directed RNA polymerase II subunit RPB1 [EC:2.7.7.6]+ko03020//RNA polymerase;K01180//endo-1,3(4)-beta-glucanase [EC:3.2.1.6]	Eukaryotic aspartyl protease		SAD1p [Chlamydomonas reinhardtii]	[T] KOG1187 Serine/threonine protein kinase	Proline-rich receptor-like protein kinase PERK2 OS=Arabidopsis thaliana GN=PERK2 PE=2 SV=3
CL2862.Contig2_All	1814	ko01110//Biosynthesis of secondary metabolites;ko01100//Metabolic pathways;ko00940//Phenylpropanoid biosynthesis;ko03020//RNA polymerase;ko03013//RNA transport	Metabolism;Genetic Information Processing	Transcription;Global and overview maps;Biosynthesis of other secondary metabolites;Translation	-7.57092	1.43884e-21	3.46191e-22	K17987//next to BRCA1 gene 1 protein;K03006//DNA-directed RNA polymerase II subunit RPB1 [EC:2.7.7.6]+ko03020//RNA polymerase;K14306//nuclear pore complex protein Nup62+ko03013//RNA transport;K14306//nuclear pore complex protein Nup62+ko03013//RNA transport;K00430//peroxidase [EC:1.11.1.7]+ko01100//Metabolic pathways+ko01110//Biosynthesis of secondary metabolites+ko00940//Phenylpropanoid biosynth…	Protein of unknown function (DUF996)		hypothetical protein L914_08051 [Phytophthora parasitica]	[GO] KOG4157 beta-1,6-N-acetylglucosaminyltransferase, contains WSC domain	Serine/arginine-rich splicing factor SR45 OS=Arabidopsis thaliana GN=SR45 PE=1 SV=1	GO:0007156//homophilic cell adhesion via plasma membrane adhesion molecules;GO:0005509//calcium ion binding;GO:0016021//integral component of membrane
Unigene86110_All	1648	ko01100//Metabolic pathways;ko03020//RNA polymerase;ko00940//Phenylpropanoid biosynthesis;ko01110//Biosynthesis of secondary metabolites	Metabolism;Genetic Information Processing	Transcription;Global and overview maps;Biosynthesis of other secondary metabolites	-8.11122	2.24214e-29	4.39675e-30	K00430//peroxidase [EC:1.11.1.7]+ko01100//Metabolic pathways+ko01110//Biosynthesis of secondary metabolites+ko00940//Phenylpropanoid biosynthesis;K00430//peroxidase [EC:1.11.1.7]+ko01100//Metabolic pathways+ko01110//Biosynthesis of secondary metabolites+ko00940//Phenylpropanoid biosynthesis;K03006//DNA-directed RNA polymerase II subunit RPB1 [EC:2.7.7.6]+ko03020//RNA polymerase	MAC/Perforin domain		unnamed protein product [Chondrus crispus] >CDF34616.1 unnamed protein product [Chondrus crispus]	[PT] KOG3599 Ca2+-modulated nonselective cation channel polycystin	Classical arabinogalactan protein 9 OS=Arabidopsis thaliana GN=AGP9 PE=1 SV=2	GO:0004252//serine-type endopeptidase activity;GO:0016539//intein-mediated protein splicing;GO:0008233//peptidase activity;GO:0016021//integral component of membrane
Unigene48214_All	1686	ko03013//RNA transport;ko03020//RNA polymerase	Genetic Information Processing	Translation;Transcription	-8.43528	2.76351e-35	4.77661e-36	K03006//DNA-directed RNA polymerase II subunit RPB1 [EC:2.7.7.6]+ko03020//RNA polymerase;K14306//nuclear pore complex protein Nup62+ko03013//RNA transport;K14306//nuclear pore complex protein Nup62+ko03013//RNA transport;K14306//nuclear pore complex protein Nup62+ko03013//RNA transport;K14306//nuclear pore complex protein Nup62+ko03013//RNA transport	Fatty acid desaturase	XM_009044732.1 Aureococcus anophagefferens hypothetical protein partial mRNA	hypothetical protein H310_01564 [Aphanomyces invadans] >ETW09114.1 hypothetical protein H310_01564 [Aphanomyces invadans]	[T] LSE0513 C 7-transmembrane receptor	Leucine-rich repeat extensin-like protein 5 OS=Arabidopsis thaliana GN=LRX5 PE=2 SV=2	GO:0004252//serine-type endopeptidase activity;GO:0016539//intein-mediated protein splicing;GO:0008233//peptidase activity;GO:0016021//integral component of membrane;GO:0006629//lipid metabolic process;GO:0016491//oxidoreductase activity
Unigene88384_All	1082	ko03020//RNA polymerase	Genetic Information Processing	Transcription	-8.61183	5.81099e-39	9.32646e-40	K01180//endo-1,3(4)-beta-glucanase [EC:3.2.1.6];K02184//formin 2;K03006//DNA-directed RNA polymerase II subunit RPB1 [EC:2.7.7.6]+ko03020//RNA polymerase	Eukaryotic porin		predicted protein [Micromonas commoda] >ACO64149.1 predicted protein [Micromonas commoda]	[T] KOG1187 Serine/threonine protein kinase	Proline-rich receptor-like protein kinase PERK9 OS=Arabidopsis thaliana GN=PERK9 PE=1 SV=1	GO:0016021//integral component of membrane

## Sheet: RNA transport
Supplementary Table 6:	Differentially expressed genes involved in RNA transport metabolism
Gene ID	Length	Pathway Name	Level 1	Level 2	log2(He_1000/He_400)	Qvalue(He_400-vs-He_1000)	Pvalue(He_400-vs-He_1000)	Kegg Orthology	Pfam	Nt	Nr	Kog	Swissprot	GO
CL870.Contig1_All	1485	ko03013//RNA transport	Genetic Information Processing	Translation	9.32942	2.15704e-59	2.5761e-60	K03231//elongation factor 1-alpha+ko03013//RNA transport;K03231//elongation factor 1-alpha+ko03013//RNA transport;K03231//elongation factor 1-alpha+ko03013//RNA transport;K03231//elongation factor 1-alpha+ko03013//RNA transport;K03231//elongation factor 1-alpha+ko03013//RNA transport	Elongation factor Tu GTP binding domain	XM_002905337.1 Phytophthora infestans T30-4 translation elongation factor 1-alpha, putative (PITG_04640) mRNA, complete cds	elongation factor 1-alpha [Phytophthora parasitica INRA-310] >ETN08985.1 elongation factor 1-alpha [Phytophthora parasitica INRA-310]	[J] KOG0052 Translation elongation factor EF-1 alpha/Tu	Elongation factor 1-alpha OS=Zea mays GN=EF1A PE=3 SV=1	GO:0003746//translation elongation factor activity;GO:0005525//GTP binding;GO:0005737//cytoplasm;GO:0003924//GTPase activity
CL870.Contig4_All	1497	ko03013//RNA transport	Genetic Information Processing	Translation	9.04033	1.2432e-50	1.65425e-51	K03231//elongation factor 1-alpha+ko03013//RNA transport;K03231//elongation factor 1-alpha+ko03013//RNA transport;K03231//elongation factor 1-alpha+ko03013//RNA transport;K03231//elongation factor 1-alpha+ko03013//RNA transport;K03231//elongation factor 1-alpha+ko03013//RNA transport	Elongation factor Tu GTP binding domain	AK250462.1 Hordeum vulgare subsp. vulgare cDNA clone: FLbaf73o03, mRNA sequence	hypothetical protein AURANDRAFT_36932 [Aureococcus anophagefferens] >XP_009035937.1 hypothetical protein AURANDRAFT_36925 [Aureococcus anophagefferens] >EGB09910.1 hypothetical protein AURANDRAFT_36932 [Aureococcus anophagefferens] >EGB09911.1 hypothetical protein AURANDRAFT_36925 [Aureococcus anophagefferens]	[J] KOG0052 Translation elongation factor EF-1 alpha/Tu	Elongation factor 1-alpha OS=Pyropia yezoensis PE=2 SV=1	GO:0003746//translation elongation factor activity;GO:0005525//GTP binding;GO:0005737//cytoplasm;GO:0003924//GTPase activity
Unigene43240_All	1407	ko03013//RNA transport	Genetic Information Processing	Translation	8.42478	6.82333e-36	1.16264e-36	K03231//elongation factor 1-alpha+ko03013//RNA transport;K03231//elongation factor 1-alpha+ko03013//RNA transport;K03231//elongation factor 1-alpha+ko03013//RNA transport;K03231//elongation factor 1-alpha+ko03013//RNA transport;K03231//elongation factor 1-alpha+ko03013//RNA transport	Elongation factor Tu GTP binding domain	AK364884.1 Hordeum vulgare subsp. vulgare mRNA for predicted protein, complete cds, clone: NIASHv2029B17	elongation factor 1 alpha [Euglena gracilis]	[J] KOG0052 Translation elongation factor EF-1 alpha/Tu	Elongation factor 1-alpha OS=Euglena gracilis GN=TEF PE=2 SV=1	GO:0003746//translation elongation factor activity;GO:0005525//GTP binding;GO:0005737//cytoplasm;GO:0003924//GTPase activity
Unigene27837_All	1137	ko03013//RNA transport	Genetic Information Processing	Translation	6.74695	1.11338e-13	3.64754e-14	K03231//elongation factor 1-alpha+ko03013//RNA transport;K03231//elongation factor 1-alpha+ko03013//RNA transport;K03231//elongation factor 1-alpha+ko03013//RNA transport;K03231//elongation factor 1-alpha+ko03013//RNA transport;K03231//elongation factor 1-alpha+ko03013//RNA transport	Elongation factor Tu C-terminal domain	AK250662.1 Hordeum vulgare subsp. vulgare cDNA clone: FLbaf93b09, mRNA sequence	elongation factor 1alpha, partial [Roombia sp. NY0200]	[J] KOG0052 Translation elongation factor EF-1 alpha/Tu	Elongation factor 1-alpha OS=Oryza sativa subsp. japonica GN=REFA1 PE=2 SV=2	GO:0003746//translation elongation factor activity;GO:0005525//GTP binding;GO:0005737//cytoplasm;GO:0003924//GTPase activity
CL6073.Contig2_All	1677	ko03013//RNA transport	Genetic Information Processing	Translation	6.63774	7.78835e-13	2.65728e-13	K14297//nuclear pore complex protein Nup98-Nup96+ko03013//RNA transport;K10990//RecQ-mediated genome instability protein 1;K14297//nuclear pore complex protein Nup98-Nup96+ko03013//RNA transport	PT repeat		Cyst germination specific acidic repeat protein precursor, partial [Phytophthora megakarya]	[WV] KOG1216 von Willebrand factor and related coagulation proteins	Probable pectinesterase/pectinesterase inhibitor 47 OS=Arabidopsis thaliana GN=PME47 PE=2 SV=1	GO:0016021//integral component of membrane
CL5384.Contig1_All	894	ko03013//RNA transport	Genetic Information Processing	Translation	6.55056	3.36998e-12	1.19005e-12	K17987//next to BRCA1 gene 1 protein;K14306//nuclear pore complex protein Nup62+ko03013//RNA transport;K14306//nuclear pore complex protein Nup62+ko03013//RNA transport			similar to hedgehog protein [Cyanidioschyzon merolae strain 10D] >BAM79537.1 similar to hedgehog protein [Cyanidioschyzon merolae strain 10D]	[T] LSE0513 C 7-transmembrane receptor	Protein TIC 214 OS=Cucumis sativus GN=TIC214 PE=3 SV=2	GO:0016539//intein-mediated protein splicing;GO:0008233//peptidase activity;GO:0016021//integral component of membrane
Unigene2745_All	649	ko03013//RNA transport	Genetic Information Processing	Translation	6.45745	1.48942e-11	5.44805e-12	K14306//nuclear pore complex protein Nup62+ko03013//RNA transport;K17987//next to BRCA1 gene 1 protein;K14306//nuclear pore complex protein Nup62+ko03013//RNA transport	Chorismate synthase		hypothetical protein Csa_1G024150 [Cucumis sativus]	[T] KOG2085 Serine/threonine protein phosphatase 2A, regulatory subunit	Dynein assembly factor 3, axonemal homolog OS=Chlamydomonas reinhardtii GN=DAB1 PE=3 SV=1
CL3420.Contig1_All	1064	ko01100//Metabolic pathways;ko04016//MAPK signaling pathway - plant;ko03013//RNA transport;ko03015//mRNA surveillance pathway;ko00520//Amino sugar and nucleotide sugar metabolism	Environmental Information Processing;Genetic Information Processing;Metabolism	Carbohydrate metabolism;Signal transduction;Global and overview maps;Translation	6.31769	4.20173e-137	2.7414e-138	K02184//formin 2;K14325//RNA-binding protein with serine-rich domain 1+ko03015//mRNA surveillance pathway+ko03013//RNA transport;K20547//basic endochitinase B [EC:3.2.1.14]+ko04016//MAPK signaling pathway - plant+ko00520//Amino sugar and nucleotide sugar metabolism+ko01100//Metabolic pathways;K14325//RNA-binding protein with serine-rich domain 1+ko03015//mRNA surveillance pathway+ko03013//RNA tra…			pathogenesis-related protein 1-like protein [Volvox carteri f. nagariensis] >EFJ52765.1 pathogenesis-related protein 1-like protein [Volvox carteri f. nagariensis]	[Z] LSE0158 H Keratin-1/Keratin-3/Keratin-4/Keratin-5/Keratin-6	Formin-like protein 5 OS=Oryza sativa subsp. japonica GN=FH5 PE=2 SV=2
Unigene2583_All	668	ko03018//RNA degradation;ko03015//mRNA surveillance pathway;ko03013//RNA transport	Genetic Information Processing	Translation;Folding, sorting and degradation	5.77295	9.31713e-08	4.41528e-08	K13126//polyadenylate-binding protein+ko03015//mRNA surveillance pathway+ko03018//RNA degradation+ko03013//RNA transport;K13126//polyadenylate-binding protein+ko03015//mRNA surveillance pathway+ko03018//RNA degradation+ko03013//RNA transport;K13126//polyadenylate-binding protein+ko03015//mRNA surveillance pathway+ko03018//RNA degradation+ko03013//RNA transport;K13126//polyadenylate-binding protei…	RNA recognition motif. (a.k.a. RRM, RBD, or RNP domain)		hypothetical protein GUITHDRAFT_84932 [Guillardia theta CCMP2712] >EKX51914.1 hypothetical protein GUITHDRAFT_84932 [Guillardia theta CCMP2712]	[AJ] KOG0123 Polyadenylate-binding protein (RRM superfamily)	Polyadenylate-binding protein 2 OS=Arabidopsis thaliana GN=PAB2 PE=1 SV=1	GO:0003723//RNA binding;GO:0003729//mRNA binding;GO:0005634//nucleus;GO:0060211//regulation of nuclear-transcribed mRNA poly(A) tail shortening;GO:0000184//nuclear-transcribed mRNA catabolic process, nonsense-mediated decay;GO:0016032//viral process;GO:0005737//cytoplasm;GO:0006413//translational initiation;GO:0006446//regulation of translational initiation;GO:0003743//translation initiation fact…
CL3420.Contig2_All	999	ko03013//RNA transport;ko03015//mRNA surveillance pathway	Genetic Information Processing	Translation	5.55217	6.73822e-78	6.56061e-79	K02184//formin 2;K14325//RNA-binding protein with serine-rich domain 1+ko03015//mRNA surveillance pathway+ko03013//RNA transport;K14325//RNA-binding protein with serine-rich domain 1+ko03015//mRNA surveillance pathway+ko03013//RNA transport		HG975520.1 Solanum lycopersicum chromosome ch08, complete genome	pathogenesis-related protein 1-like protein [Volvox carteri f. nagariensis] >EFJ52765.1 pathogenesis-related protein 1-like protein [Volvox carteri f. nagariensis]	[ZR] LSE0118 A Protein possibly involved in cytoskeleton rearrangements, contains FH domain	Formin-like protein 5 OS=Oryza sativa subsp. japonica GN=FH5 PE=2 SV=2
CL7717.Contig1_All	762	ko03040//Spliceosome;ko01100//Metabolic pathways;ko01110//Biosynthesis of secondary metabolites;ko03015//mRNA surveillance pathway;ko00940//Phenylpropanoid biosynthesis;ko03013//RNA transport	Metabolism;Genetic Information Processing	Transcription;Global and overview maps;Biosynthesis of other secondary metabolites;Translation	5.55056	7.98345e-07	4.11451e-07	K12875//apoptotic chromatin condensation inducer in the nucleus+ko03040//Spliceosome+ko03015//mRNA surveillance pathway+ko03013//RNA transport;K11855//ubiquitin carboxyl-terminal hydrolase 36/42 [EC:3.4.19.12];K10990//RecQ-mediated genome instability protein 1;K00430//peroxidase [EC:1.11.1.7]+ko01100//Metabolic pathways+ko01110//Biosynthesis of secondary metabolites+ko00940//Phenylpropanoid biosy…			hypothetical protein SDRG_02301 [Saprolegnia diclina VS20] >EQC40404.1 hypothetical protein SDRG_02301 [Saprolegnia diclina VS20]	[WV] KOG1216 von Willebrand factor and related coagulation proteins	Proline-rich receptor-like protein kinase PERK2 OS=Arabidopsis thaliana GN=PERK2 PE=2 SV=3	GO:0006508//proteolysis;GO:0016021//integral component of membrane;GO:0005576//extracellular region
CL3147.Contig3_All	2707	ko03013//RNA transport	Genetic Information Processing	Translation	5.0388	2.56341e-25	5.54333e-26	K18213//proteinaceous RNase P [EC:3.1.26.5]+ko03013//RNA transport;K18213//proteinaceous RNase P [EC:3.1.26.5]+ko03013//RNA transport;K18213//proteinaceous RNase P [EC:3.1.26.5]+ko03013//RNA transport;K18213//proteinaceous RNase P [EC:3.1.26.5]+ko03013//RNA transport;K18213//proteinaceous RNase P [EC:3.1.26.5]+ko03013//RNA transport	Protein-only RNase P		hypothetical protein BU14_0251s0002 [Porphyra umbilicalis]	[T] KOG1187 Serine/threonine protein kinase	Proteinaceous RNase P 1, chloroplastic/mitochondrial OS=Arabidopsis thaliana GN=PRORP1 PE=1 SV=1	GO:0009055//electron transfer activity
Unigene55014_All	503	ko03013//RNA transport	Genetic Information Processing	Translation	4.66603	0.000364626	0.000260449	K10955//mucin-2;K14297//nuclear pore complex protein Nup98-Nup96+ko03013//RNA transport;K14306//nuclear pore complex protein Nup62+ko03013//RNA transport;K14297//nuclear pore complex protein Nup98-Nup96+ko03013//RNA transport	Domain of unknown function (DUF4251)		similar to hedgehog protein [Cyanidioschyzon merolae strain 10D] >BAM79403.1 similar to hedgehog protein [Cyanidioschyzon merolae strain 10D]	[WV] KOG1216 von Willebrand factor and related coagulation proteins	50 kDa gamma-zein OS=Zea mays GN=GRMZM2G138689 PE=1 SV=1	GO:0016539//intein-mediated protein splicing;GO:0008233//peptidase activity;GO:0016021//integral component of membrane
Unigene22281_All	2727	ko00040//Pentose and glucuronate interconversions;ko03013//RNA transport;ko03015//mRNA surveillance pathway;ko03040//Spliceosome;ko01100//Metabolic pathways	Metabolism;Genetic Information Processing	Global and overview maps;Translation;Carbohydrate metabolism;Transcription	4.15047	5.85789e-185	2.98428e-186	K12875//apoptotic chromatin condensation inducer in the nucleus+ko03040//Spliceosome+ko03015//mRNA surveillance pathway+ko03013//RNA transport;K01051//pectinesterase [EC:3.1.1.11]+ko00040//Pentose and glucuronate interconversions+ko01100//Metabolic pathways	Multicopper oxidase		hypothetical protein FRACYDRAFT_232027 [Fragilariopsis cylindrus CCMP1102]	[M] KOG0621 Phospholipid scramblase	Early nodulin-20 OS=Medicago truncatula GN=ENOD20 PE=3 SV=1	GO:0016539//intein-mediated protein splicing;GO:0008233//peptidase activity;GO:0016021//integral component of membrane
Unigene5454_All	1517	ko03013//RNA transport;ko03015//mRNA surveillance pathway	Genetic Information Processing	Translation	3.88317	1.44335e-10	5.61164e-11	K14325//RNA-binding protein with serine-rich domain 1+ko03015//mRNA surveillance pathway+ko03013//RNA transport;K14325//RNA-binding protein with serine-rich domain 1+ko03015//mRNA surveillance pathway+ko03013//RNA transport;K14325//RNA-binding protein with serine-rich domain 1+ko03015//mRNA surveillance pathway+ko03013//RNA transport;K14325//RNA-binding protein with serine-rich domain 1+ko03015//…	Ankyrin repeats (many copies)		hypothetical protein PHYSODRAFT_494306 [Phytophthora sojae] >EGZ19644.1 hypothetical protein PHYSODRAFT_494306 [Phytophthora sojae]	[R] KOG0504 FOG: Ankyrin repeat
CL9260.Contig16_All	1417	ko00940//Phenylpropanoid biosynthesis;ko01100//Metabolic pathways;ko03015//mRNA surveillance pathway;ko03013//RNA transport;ko01110//Biosynthesis of secondary metabolites;ko04144//Endocytosis	Metabolism;Genetic Information Processing;Cellular Processes	Translation;Global and overview maps;Biosynthesis of other secondary metabolites;Transport and catabolism	3.59027	8.40918e-21	2.07555e-21	K13171//serine/arginine repetitive matrix protein 1+ko03015//mRNA surveillance pathway+ko03013//RNA transport;K05747//Wiskott-Aldrich syndrome protein+ko04144//Endocytosis;K14325//RNA-binding protein with serine-rich domain 1+ko03015//mRNA surveillance pathway+ko03013//RNA transport;K00430//peroxidase [EC:1.11.1.7]+ko01100//Metabolic pathways+ko01110//Biosynthesis of secondary metabolites+ko00940…	Kinase associated domain 1		hypothetical protein BU14_0694s0004 [Porphyra umbilicalis]	[W] KOG3544 Collagens (type IV and type XIII), and related proteins	Proline-rich receptor-like protein kinase PERK10 OS=Arabidopsis thaliana GN=PERK10 PE=1 SV=2
Unigene22305_All	1411	ko03013//RNA transport	Genetic Information Processing	Translation	3.42416	1.89888e-10	7.43314e-11	K18213//proteinaceous RNase P [EC:3.1.26.5]+ko03013//RNA transport;K18213//proteinaceous RNase P [EC:3.1.26.5]+ko03013//RNA transport;K18213//proteinaceous RNase P [EC:3.1.26.5]+ko03013//RNA transport;K18213//proteinaceous RNase P [EC:3.1.26.5]+ko03013//RNA transport;K18213//proteinaceous RNase P [EC:3.1.26.5]+ko03013//RNA transport	Protein-only RNase P		predicted protein [Phaeodactylum tricornutum CCAP 1055/1] >EEC46886.1 predicted protein [Phaeodactylum tricornutum CCAP 1055/1]		Proteinaceous RNase P 1, chloroplastic/mitochondrial OS=Arabidopsis thaliana GN=PRORP1 PE=1 SV=1	GO:0005739//mitochondrion;GO:0008033//tRNA processing
Unigene40862_All	2537	ko03015//mRNA surveillance pathway;ko03013//RNA transport	Genetic Information Processing	Translation	3.38135	1.56751e-244	6.41879e-246	K14325//RNA-binding protein with serine-rich domain 1+ko03015//mRNA surveillance pathway+ko03013//RNA transport;K04730//interleukin-1 receptor-associated kinase 1 [EC:2.7.11.1];K13171//serine/arginine repetitive matrix protein 1+ko03015//mRNA surveillance pathway+ko03013//RNA transport;K22020//mucin-19;K05740//diaphanous 1+ko04933//AGE-RAGE signaling pathway in diabetic complications			hypothetical protein BU14_0142s0004 [Porphyra umbilicalis]	[A] KOG1869 Splicing coactivator SRm160/300, subunit SRm300
CL9383.Contig1_All	867	ko03015//mRNA surveillance pathway;ko01100//Metabolic pathways;ko03022//Basal transcription factors;ko03013//RNA transport;ko01110//Biosynthesis of secondary metabolites;ko03040//Spliceosome;ko00940//Phenylpropanoid biosynthesis	Metabolism;Genetic Information Processing	Global and overview maps;Translation;Transcription;Biosynthesis of other secondary metabolites	3.23861	2.31283e-06	1.24696e-06	K10955//mucin-2;K12875//apoptotic chromatin condensation inducer in the nucleus+ko03040//Spliceosome+ko03015//mRNA surveillance pathway+ko03013//RNA transport;K00430//peroxidase [EC:1.11.1.7]+ko01100//Metabolic pathways+ko01110//Biosynthesis of secondary metabolites+ko00940//Phenylpropanoid biosynthesis;K03126//transcription initiation factor TFIID subunit 12+ko03022//Basal transcription factors	Mitotic checkpoint regulator, MAD2B-interacting		expressed unknown protein [Ectocarpus siliculosus]	[R] KOG0619 FOG: Leucine rich repeat	Proline-rich receptor-like protein kinase PERK8 OS=Arabidopsis thaliana GN=PERK8 PE=1 SV=1	GO:0008061//chitin binding;GO:0006904//vesicle docking involved in exocytosis
CL10180.Contig1_All	2953	ko03015//mRNA surveillance pathway;ko03013//RNA transport	Genetic Information Processing	Translation	3.09443	5.53672e-76	5.51104e-77	K13171//serine/arginine repetitive matrix protein 1+ko03015//mRNA surveillance pathway+ko03013//RNA transport;K13171//serine/arginine repetitive matrix protein 1+ko03015//mRNA surveillance pathway+ko03013//RNA transport;K13171//serine/arginine repetitive matrix protein 1+ko03015//mRNA surveillance pathway+ko03013//RNA transport;K13171//serine/arginine repetitive matrix protein 1+ko03015//mRNA sur…	Astacin (Peptidase family M12A)		hypothetical protein PHYSODRAFT_314261 [Phytophthora sojae] >EGZ16473.1 hypothetical protein PHYSODRAFT_314261 [Phytophthora sojae]	[A] KOG1869 Splicing coactivator SRm160/300, subunit SRm300	Nuclear pore complex protein NUP62 OS=Arabidopsis thaliana GN=NUP62 PE=1 SV=1	GO:0016539//intein-mediated protein splicing;GO:0008233//peptidase activity;GO:0016021//integral component of membrane
Unigene33729_All	890	ko03015//mRNA surveillance pathway;ko03013//RNA transport	Genetic Information Processing	Translation	3.03255	1.5376e-70	1.61273e-71	K22020//mucin-19;K14325//RNA-binding protein with serine-rich domain 1+ko03015//mRNA surveillance pathway+ko03013//RNA transport;K14325//RNA-binding protein with serine-rich domain 1+ko03015//mRNA surveillance pathway+ko03013//RNA transport;K14325//RNA-binding protein with serine-rich domain 1+ko03015//mRNA surveillance pathway+ko03013//RNA transport;K14325//RNA-binding protein with serine-rich d…	Major Facilitator Superfamily		hypothetical protein AURANDRAFT_66130 [Aureococcus anophagefferens] >EGB05892.1 hypothetical protein AURANDRAFT_66130 [Aureococcus anophagefferens]	[R] KOG0118 FOG: RRM domain	Serine/arginine-rich splicing factor SR45 OS=Arabidopsis thaliana GN=SR45 PE=1 SV=1	GO:0016021//integral component of membrane
Unigene13284_All	2406	ko03015//mRNA surveillance pathway;ko03013//RNA transport	Genetic Information Processing	Translation	2.98614	2.09783e-130	1.42146e-131	K16628//collagen, type VII, alpha;K13171//serine/arginine repetitive matrix protein 1+ko03015//mRNA surveillance pathway+ko03013//RNA transport;K22020//mucin-19;K13171//serine/arginine repetitive matrix protein 1+ko03015//mRNA surveillance pathway+ko03013//RNA transport	Glycosyl hydrolases family 16		hypothetical protein H310_04725 [Aphanomyces invadans] >ETW04452.1 hypothetical protein H310_04725 [Aphanomyces invadans]	[K] KOG0147 Transcriptional coactivator CAPER (RRM superfamily)	Serine/arginine-rich splicing factor SR45 OS=Arabidopsis thaliana GN=SR45 PE=1 SV=1	GO:0004553//hydrolase activity, hydrolyzing O-glycosyl compounds;GO:0005975//carbohydrate metabolic process;GO:0016021//integral component of membrane
CL10507.Contig2_All	2609	ko03015//mRNA surveillance pathway;ko03013//RNA transport	Genetic Information Processing	Translation	2.77552	1.5669e-22	3.66353e-23	K13171//serine/arginine repetitive matrix protein 1+ko03015//mRNA surveillance pathway+ko03013//RNA transport	GTP cyclohydrolase N terminal	XM_009040664.1 Aureococcus anophagefferens hypothetical protein partial mRNA	hypothetical protein FisN_3Hh541 [Fistulifera solaris]	[H] KOG1284 Bifunctional GTP cyclohydrolase II/3,4-dihydroxy-2butanone-4-phosphate synthase		GO:0008686//3,4-dihydroxy-2-butanone-4-phosphate synthase activity;GO:0009231//riboflavin biosynthetic process;GO:0005737//cytoplasm
CL188.Contig1_All	2058	ko03015//mRNA surveillance pathway;ko03013//RNA transport;ko04144//Endocytosis	Cellular Processes;Genetic Information Processing	Translation;Transport and catabolism	2.74462	2.28775e-15	6.95381e-16	K05747//Wiskott-Aldrich syndrome protein+ko04144//Endocytosis;K14325//RNA-binding protein with serine-rich domain 1+ko03015//mRNA surveillance pathway+ko03013//RNA transport;K04733//interleukin-1 receptor-associated kinase 4 [EC:2.7.11.1]	DNA replication regulator SLD3		fibrocystin-L-like protein [Chlamydomonas reinhardtii] >EDP05658.1 fibrocystin-L-like protein [Chlamydomonas reinhardtii]	[O] KOG0019 Molecular chaperone (HSP90 family)	Proline-rich receptor-like protein kinase PERK8 OS=Arabidopsis thaliana GN=PERK8 PE=1 SV=1	GO:0009055//electron transfer activity
Unigene25618_All	3710	ko03013//RNA transport	Genetic Information Processing	Translation	2.71345	3.25272e-30	6.26266e-31	K14306//nuclear pore complex protein Nup62+ko03013//RNA transport;K14306//nuclear pore complex protein Nup62+ko03013//RNA transport;K14306//nuclear pore complex protein Nup62+ko03013//RNA transport;K14306//nuclear pore complex protein Nup62+ko03013//RNA transport;K14306//nuclear pore complex protein Nup62+ko03013//RNA transport	Thrombospondin type 3 repeat		hypothetical protein FisN_18Lh149 [Fistulifera solaris]	[W] TWOG0102 Thrombospondin/Oligomeric matrix protein precursor (COMP)	Nuclear pore complex protein NUP62 OS=Arabidopsis thaliana GN=NUP62 PE=1 SV=1
CL2101.Contig2_All	2480	ko04145//Phagosome;ko04141//Protein processing in endoplasmic reticulum;ko01110//Biosynthesis of secondary metabolites;ko03060//Protein export;ko03015//mRNA surveillance pathway;ko01100//Metabolic pathways;ko00940//Phenylpropanoid biosynthesis;ko03013//RNA transport	Genetic Information Processing;Cellular Processes;Metabolism	Global and overview maps;Folding, sorting and degradation;Translation;Transport and catabolism;Biosynthesis of other secondary metabolites	2.67989	0	0	K10956//protein transport protein SEC61 subunit alpha+ko04145//Phagosome+ko04141//Protein processing in endoplasmic reticulum+ko03060//Protein export;K00430//peroxidase [EC:1.11.1.7]+ko01100//Metabolic pathways+ko01110//Biosynthesis of secondary metabolites+ko00940//Phenylpropanoid biosynthesis;K13171//serine/arginine repetitive matrix protein 1+ko03015//mRNA surveillance pathway+ko03013//RNA tra…			hypothetical protein BU14_0256s0024 [Porphyra umbilicalis]	[M] LSE0601 A Pollen extensin-like protein (Pex)	Proline-rich receptor-like protein kinase PERK2 OS=Arabidopsis thaliana GN=PERK2 PE=2 SV=3	GO:0004252//serine-type endopeptidase activity;GO:0016539//intein-mediated protein splicing;GO:0008233//peptidase activity;GO:0016021//integral component of membrane
CL916.Contig3_All	1039	ko00040//Pentose and glucuronate interconversions;ko01100//Metabolic pathways;ko03013//RNA transport	Metabolism;Genetic Information Processing	Translation;Global and overview maps;Carbohydrate metabolism	2.60298	1.84626e-06	9.85686e-07	K01051//pectinesterase [EC:3.1.1.11]+ko00040//Pentose and glucuronate interconversions+ko01100//Metabolic pathways;K17987//next to BRCA1 gene 1 protein;K01414//oligopeptidase A [EC:3.4.24.70];K14306//nuclear pore complex protein Nup62+ko03013//RNA transport	SDA1		hypothetical protein Csa_7G372310 [Cucumis sativus]	[Y] KOG2992 Nucleolar GTPase/ATPase p130	Glycine-rich protein DOT1 OS=Arabidopsis thaliana GN=DOT1 PE=2 SV=1
Unigene38153_All	1837	ko04712//Circadian rhythm - plant;ko03013//RNA transport;ko03008//Ribosome biogenesis in eukaryotes	Genetic Information Processing;Organismal Systems	Translation;Environmental adaptation	2.52844	0	0	K03539//ribonuclease P/MRP protein subunit RPP1 [EC:3.1.26.5]+ko03013//RNA transport+ko03008//Ribosome biogenesis in eukaryotes;K03539//ribonuclease P/MRP protein subunit RPP1 [EC:3.1.26.5]+ko03013//RNA transport+ko03008//Ribosome biogenesis in eukaryotes;K03539//ribonuclease P/MRP protein subunit RPP1 [EC:3.1.26.5]+ko03013//RNA transport+ko03008//Ribosome biogenesis in eukaryotes;K03539//ribonuc…	CCT motif		CCT domain protein [Nannochloropsis gaditana]	[K] KOG1601 GATA-4/5/6 transcription factors	Zinc finger protein CONSTANS-LIKE 16 OS=Arabidopsis thaliana GN=COL16 PE=1 SV=2
Unigene37406_All	970	ko03013//RNA transport;ko03015//mRNA surveillance pathway	Genetic Information Processing	Translation	2.51076	4.41718e-40	6.94463e-41	K19719//collagen, type II, alpha;K14325//RNA-binding protein with serine-rich domain 1+ko03015//mRNA surveillance pathway+ko03013//RNA transport;K14325//RNA-binding protein with serine-rich domain 1+ko03015//mRNA surveillance pathway+ko03013//RNA transport;K16628//collagen, type VII, alpha;K14325//RNA-binding protein with serine-rich domain 1+ko03015//mRNA surveillance pathway+ko03013//RNA transp…	Major Facilitator Superfamily		hypothetical protein BU14_0027s0041, partial [Porphyra umbilicalis]	[W] KOG3544 Collagens (type IV and type XIII), and related proteins	Proline-rich receptor-like protein kinase PERK2 OS=Arabidopsis thaliana GN=PERK2 PE=2 SV=3
CL2478.Contig1_All	1163	ko03013//RNA transport	Genetic Information Processing	Translation	2.50203	2.33561e-07	1.14571e-07	K14306//nuclear pore complex protein Nup62+ko03013//RNA transport;K14306//nuclear pore complex protein Nup62+ko03013//RNA transport;K14306//nuclear pore complex protein Nup62+ko03013//RNA transport;K01414//oligopeptidase A [EC:3.4.24.70]	Spt4/RpoE2 zinc finger		hypothetical protein Csa_5G139200 [Cucumis sativus]	[S] LSE0402 A Uncharacterized protein
Unigene40676_All	1798	ko01100//Metabolic pathways;ko00040//Pentose and glucuronate interconversions;ko03013//RNA transport;ko03015//mRNA surveillance pathway;ko03040//Spliceosome;ko04141//Protein processing in endoplasmic reticulum	Genetic Information Processing;Metabolism	Carbohydrate metabolism;Transcription;Global and overview maps;Folding, sorting and degradation;Translation	2.48141	4.6448e-38	7.59115e-39	K12875//apoptotic chromatin condensation inducer in the nucleus+ko03040//Spliceosome+ko03015//mRNA surveillance pathway+ko03013//RNA transport;K01051//pectinesterase [EC:3.1.1.11]+ko00040//Pentose and glucuronate interconversions+ko01100//Metabolic pathways;K03327//multidrug resistance protein, MATE family;K11863//Ataxin-3 [EC:3.4.22.-]+ko04141//Protein processing in endoplasmic reticulum	PT repeat		hypothetical protein SDRG_04536 [Saprolegnia diclina VS20] >EQC38106.1 hypothetical protein SDRG_04536 [Saprolegnia diclina VS20]	[R] KOG4307 RNA binding protein RBM12/SWAN	Non-classical arabinogalactan protein 31 OS=Arabidopsis thaliana GN=AGP31 PE=1 SV=1	GO:0046872//metal ion binding;GO:0016491//oxidoreductase activity
CL3874.Contig6_All	2473	ko03040//Spliceosome;ko03015//mRNA surveillance pathway;ko03013//RNA transport	Genetic Information Processing	Transcription;Translation	2.47092	1.38933e-45	1.99652e-46	K12812//ATP-dependent RNA helicase UAP56/SUB2 [EC:3.6.4.13]+ko03040//Spliceosome+ko03015//mRNA surveillance pathway+ko03013//RNA transport;K12812//ATP-dependent RNA helicase UAP56/SUB2 [EC:3.6.4.13]+ko03040//Spliceosome+ko03015//mRNA surveillance pathway+ko03013//RNA transport;K12812//ATP-dependent RNA helicase UAP56/SUB2 [EC:3.6.4.13]+ko03040//Spliceosome+ko03015//mRNA surveillance pathway+ko030…	DEAD/DEAH box helicase	XM_009517395.1 Phytophthora sojae hypothetical protein partial mRNA	atp-dependent rna helicase uap56 [Plasmopara halstedii]	[A] KOG0329 ATP-dependent RNA helicase	DEAD-box ATP-dependent RNA helicase 56 OS=Arabidopsis thaliana GN=RH56 PE=1 SV=2	GO:0006406//mRNA export from nucleus;GO:0010468//regulation of gene expression;GO:0000398//mRNA splicing, via spliceosome;GO:0005524//ATP binding;GO:0004386//helicase activity;GO:0005737//cytoplasm;GO:0003676//nucleic acid binding;GO:0005730//nucleolus;GO:0005681//spliceosomal complex;GO:0004004//ATP-dependent RNA helicase activity;GO:0010501//RNA secondary structure unwinding;GO:0006974//cellula…
CL2914.Contig1_All	1099	ko03040//Spliceosome;ko03013//RNA transport;ko00520//Amino sugar and nucleotide sugar metabolism;ko01100//Metabolic pathways;ko04016//MAPK signaling pathway - plant;ko03015//mRNA surveillance pathway	Environmental Information Processing;Genetic Information Processing;Metabolism	Signal transduction;Carbohydrate metabolism;Transcription;Global and overview maps;Translation	2.45342	5.27242e-07	2.67022e-07	K20547//basic endochitinase B [EC:3.2.1.14]+ko04016//MAPK signaling pathway - plant+ko00520//Amino sugar and nucleotide sugar metabolism+ko01100//Metabolic pathways;K12900//FUS-interacting serine-arginine-rich protein 1+ko03040//Spliceosome;K02184//formin 2;K13171//serine/arginine repetitive matrix protein 1+ko03015//mRNA surveillance pathway+ko03013//RNA transport	Spt5 transcription elongation factor, acidic N-terminal		hypothetical protein BU14_0141s0001 [Porphyra umbilicalis]	[M] LSE0601 A Pollen extensin-like protein (Pex)	Leucine-rich repeat extensin-like protein 3 OS=Arabidopsis thaliana GN=LRX3 PE=1 SV=1
CL10665.Contig1_All	778	ko03040//Spliceosome;ko03015//mRNA surveillance pathway;ko03013//RNA transport	Genetic Information Processing	Translation;Transcription	2.43548	1.24138e-05	7.25569e-06	K10990//RecQ-mediated genome instability protein 1;K12875//apoptotic chromatin condensation inducer in the nucleus+ko03040//Spliceosome+ko03015//mRNA surveillance pathway+ko03013//RNA transport;K04733//interleukin-1 receptor-associated kinase 4 [EC:2.7.11.1];K11855//ubiquitin carboxyl-terminal hydrolase 36/42 [EC:3.4.19.12];K10990//RecQ-mediated genome instability protein 1	EGF-like domain		hypothetical protein H310_03146 [Aphanomyces invadans] >ETW07074.1 hypothetical protein H310_03146 [Aphanomyces invadans]	[WV] KOG1216 von Willebrand factor and related coagulation proteins	Extensin OS=Zea mays GN=HRGP PE=2 SV=1	GO:0004252//serine-type endopeptidase activity;GO:0008237//metallopeptidase activity;GO:0005576//extracellular region;GO:0016021//integral component of membrane
CL393.Contig1_All	785	ko03015//mRNA surveillance pathway;ko03013//RNA transport	Genetic Information Processing	Translation	2.43072	0.000288373	0.000202375	K13171//serine/arginine repetitive matrix protein 1+ko03015//mRNA surveillance pathway+ko03013//RNA transport;K13171//serine/arginine repetitive matrix protein 1+ko03015//mRNA surveillance pathway+ko03013//RNA transport	KAP family P-loop domain		hypothetical protein BU14_0180s0014, partial [Porphyra umbilicalis]	[R] KOG0502 Integral membrane ankyrin-repeat protein Kidins220 (protein kinase D substrate)
CL2282.Contig1_All	1513	ko03013//RNA transport;ko03040//Spliceosome;ko03015//mRNA surveillance pathway	Genetic Information Processing	Transcription;Translation	2.32892	1.54341e-18	4.12792e-19	K12875//apoptotic chromatin condensation inducer in the nucleus+ko03040//Spliceosome+ko03015//mRNA surveillance pathway+ko03013//RNA transport;K12418//acyl-lipid (7-3)-desaturase (Delta-4 desaturase) [EC:1.14.19.31];K04650//nuclear receptor co-repressor 1	FG-GAP repeat		similar to hedgehog protein [Cyanidioschyzon merolae strain 10D] >BAM79403.1 similar to hedgehog protein [Cyanidioschyzon merolae strain 10D]	[LR] LSE0097 Y DNA helicase	Non-classical arabinogalactan protein 30 OS=Arabidopsis thaliana GN=AGP30 PE=2 SV=1	GO:0016539//intein-mediated protein splicing;GO:0008233//peptidase activity;GO:0016021//integral component of membrane
Unigene35642_All	403	ko03013//RNA transport;ko01100//Metabolic pathways;ko01110//Biosynthesis of secondary metabolites;ko00940//Phenylpropanoid biosynthesis;ko03015//mRNA surveillance pathway	Genetic Information Processing;Metabolism	Biosynthesis of other secondary metabolites;Global and overview maps;Translation	2.28752	6.29698e-05	4.01079e-05	K00430//peroxidase [EC:1.11.1.7]+ko01100//Metabolic pathways+ko01110//Biosynthesis of secondary metabolites+ko00940//Phenylpropanoid biosynthesis;K14325//RNA-binding protein with serine-rich domain 1+ko03015//mRNA surveillance pathway+ko03013//RNA transport;K14325//RNA-binding protein with serine-rich domain 1+ko03015//mRNA surveillance pathway+ko03013//RNA transport			hypothetical protein BU14_0178s0013 [Porphyra umbilicalis]	[A] KOG1869 Splicing coactivator SRm160/300, subunit SRm300
Unigene46301_All	532	ko03040//Spliceosome;ko03015//mRNA surveillance pathway;ko03013//RNA transport	Genetic Information Processing	Translation;Transcription	2.21352	2.25775e-12	7.88977e-13	K04733//interleukin-1 receptor-associated kinase 4 [EC:2.7.11.1];K04733//interleukin-1 receptor-associated kinase 4 [EC:2.7.11.1];K04733//interleukin-1 receptor-associated kinase 4 [EC:2.7.11.1];K01180//endo-1,3(4)-beta-glucanase [EC:3.2.1.6];K12875//apoptotic chromatin condensation inducer in the nucleus+ko03040//Spliceosome+ko03015//mRNA surveillance pathway+ko03013//RNA transport			PREDICTED: basic proline-rich protein-like, partial [Oryza sativa Japonica Group]	[ZR] LSE0118 A Protein possibly involved in cytoskeleton rearrangements, contains FH domain	Sulfated surface glycoprotein 185 OS=Volvox carteri PE=1 SV=1
CL290.Contig3_All	2003	ko03015//mRNA surveillance pathway;ko03013//RNA transport	Genetic Information Processing	Translation	2.21024	4.23531e-260	1.64742e-261	K02184//formin 2;K14306//nuclear pore complex protein Nup62+ko03013//RNA transport;K13171//serine/arginine repetitive matrix protein 1+ko03015//mRNA surveillance pathway+ko03013//RNA transport	Common central domain of tyrosinase	AM441538.1 Vitis vinifera contig VV78X221412.4, whole genome shotgun sequence	hypothetical protein AURANDRAFT_64780 [Aureococcus anophagefferens] >EGB07698.1 hypothetical protein AURANDRAFT_64780 [Aureococcus anophagefferens]	[WV] KOG1216 von Willebrand factor and related coagulation proteins		GO:0046872//metal ion binding;GO:0016491//oxidoreductase activity
CL2397.Contig1_All	2914	ko03013//RNA transport;ko03040//Spliceosome;ko03015//mRNA surveillance pathway	Genetic Information Processing	Translation;Transcription	2.20838	0	0	K22020//mucin-19;K13171//serine/arginine repetitive matrix protein 1+ko03015//mRNA surveillance pathway+ko03013//RNA transport;K12896//splicing factor, arginine/serine-rich 7+ko03040//Spliceosome;K19719//collagen, type II, alpha	RNA recognition motif. (a.k.a. RRM, RBD, or RNP domain)		hypothetical protein BU14_0141s0001 [Porphyra umbilicalis]	[A] KOG1869 Splicing coactivator SRm160/300, subunit SRm300
Unigene13076_All	2844	ko03013//RNA transport;ko03015//mRNA surveillance pathway	Genetic Information Processing	Translation	2.20361	2.78481e-35	4.814e-36	K17987//next to BRCA1 gene 1 protein;K14439//SWI/SNF-related matrix-associated actin-dependent regulator of chromatin subfamily A containing DEAD/H box 1 [EC:3.6.4.12];K08874//transformation/transcription domain-associated protein;K13171//serine/arginine repetitive matrix protein 1+ko03015//mRNA surveillance pathway+ko03013//RNA transport	Nucleoside diphosphate kinase		hypothetical protein FRACYDRAFT_260637 [Fragilariopsis cylindrus CCMP1102]	[J] KOG3434 60S ribosomal protein L22	Cilia- and flagella-associated protein 91 OS=Chlamydomonas reinhardtii GN=CFAP91 PE=1 SV=1
Unigene22054_All	1734	ko03013//RNA transport;ko03015//mRNA surveillance pathway;ko03040//Spliceosome	Genetic Information Processing	Translation;Transcription	2.19077	3.13578e-21	7.63629e-22	K10408//dynein heavy chain, axonemal;K12875//apoptotic chromatin condensation inducer in the nucleus+ko03040//Spliceosome+ko03015//mRNA surveillance pathway+ko03013//RNA transport	Cysteine-rich secretory protein family		hypothetical protein COCSUDRAFT_66929 [Coccomyxa subellipsoidea C-169] >EIE21520.1 hypothetical protein COCSUDRAFT_66929 [Coccomyxa subellipsoidea C-169]
Unigene23109_All	2107	ko03013//RNA transport;ko03015//mRNA surveillance pathway	Genetic Information Processing	Translation	2.17119	0	0	K14325//RNA-binding protein with serine-rich domain 1+ko03015//mRNA surveillance pathway+ko03013//RNA transport;K14325//RNA-binding protein with serine-rich domain 1+ko03015//mRNA surveillance pathway+ko03013//RNA transport;K14325//RNA-binding protein with serine-rich domain 1+ko03015//mRNA surveillance pathway+ko03013//RNA transport;K14325//RNA-binding protein with serine-rich domain 1+ko03015//…	Sugar-tranasporters, 12 TM		hypothetical protein BU14_1728s0001 [Porphyra umbilicalis]	[G] KOG4332 Predicted sugar transporter		GO:0016021//integral component of membrane;GO:0015098//molybdate ion transmembrane transporter activity
CL2548.Contig5_All	1246	ko03013//RNA transport	Genetic Information Processing	Translation	2.1386	0	0	K14306//nuclear pore complex protein Nup62+ko03013//RNA transport	Protein of unknown function (DUF793)		hypothetical protein FisN_8Lh260 [Fistulifera solaris]	[YU] KOG0845 Nuclear pore complex, Nup98 component (sc Nup145/Nup100/Nup116)	Dynein assembly factor 3, axonemal homolog OS=Chlamydomonas reinhardtii GN=DAB1 PE=3 SV=1	GO:0006810//transport;GO:0046872//metal ion binding;GO:0005643//nuclear pore
Unigene25619_All	4102	ko03013//RNA transport	Genetic Information Processing	Translation	2.10921	4.58866e-60	5.43767e-61	K14306//nuclear pore complex protein Nup62+ko03013//RNA transport;K14306//nuclear pore complex protein Nup62+ko03013//RNA transport;K14306//nuclear pore complex protein Nup62+ko03013//RNA transport;K14306//nuclear pore complex protein Nup62+ko03013//RNA transport;K14306//nuclear pore complex protein Nup62+ko03013//RNA transport	Thrombospondin type 3 repeat		hypothetical protein FisN_18Lh149 [Fistulifera solaris]	[W] TWOG0102 Thrombospondin/Oligomeric matrix protein precursor (COMP)	Nuclear pore complex protein NUP62 OS=Arabidopsis thaliana GN=NUP62 PE=1 SV=1
Unigene55784_All	1041	ko03013//RNA transport;ko03020//RNA polymerase;ko03040//Spliceosome;ko03015//mRNA surveillance pathway	Genetic Information Processing	Translation;Transcription	2.08107	0.000431934	0.000312263	K12875//apoptotic chromatin condensation inducer in the nucleus+ko03040//Spliceosome+ko03015//mRNA surveillance pathway+ko03013//RNA transport;K03006//DNA-directed RNA polymerase II subunit RPB1 [EC:2.7.7.6]+ko03020//RNA polymerase	PT repeat		carbohydrate-binding protein [Thraustotheca clavata]	[M] LSE0024 A Pectinesterase	Early nodulin-20 OS=Medicago truncatula GN=ENOD20 PE=3 SV=1
Unigene33590_All	1530	ko03013//RNA transport	Genetic Information Processing	Translation	1.99646	7.52202e-79	7.25264e-80	K03231//elongation factor 1-alpha+ko03013//RNA transport;K03231//elongation factor 1-alpha+ko03013//RNA transport;K03231//elongation factor 1-alpha+ko03013//RNA transport	Elongation factor Tu GTP binding domain	AB368773.1 Skeletonema costatum EFL mRNA for elongation factor-like, partial cds	elongation factor-like, partial [Skeletonema costatum]	[J] KOG0052 Translation elongation factor EF-1 alpha/Tu	Elongation factor 1-alpha OS=Pyropia yezoensis PE=2 SV=1	GO:0003746//translation elongation factor activity;GO:0005622//intracellular;GO:0005525//GTP binding;GO:0003924//GTPase activity
CL9667.Contig1_All	1981	ko03013//RNA transport;ko03015//mRNA surveillance pathway	Genetic Information Processing	Translation	1.99626	0	0	K14325//RNA-binding protein with serine-rich domain 1+ko03015//mRNA surveillance pathway+ko03013//RNA transport;K14325//RNA-binding protein with serine-rich domain 1+ko03015//mRNA surveillance pathway+ko03013//RNA transport;K14325//RNA-binding protein with serine-rich domain 1+ko03015//mRNA surveillance pathway+ko03013//RNA transport;K14325//RNA-binding protein with serine-rich domain 1+ko03015//…	TRIC channel		conserved unknown protein [Ectocarpus siliculosus]		Serine/arginine-rich splicing factor SR45 OS=Arabidopsis thaliana GN=SR45 PE=1 SV=1
Unigene10724_All	1784	ko03013//RNA transport;ko03015//mRNA surveillance pathway;ko04712//Circadian rhythm - plant	Organismal Systems;Genetic Information Processing	Environmental adaptation;Translation	1.99195	6.2407e-273	2.33082e-274	K22020//mucin-19;K14325//RNA-binding protein with serine-rich domain 1+ko03015//mRNA surveillance pathway+ko03013//RNA transport;K14325//RNA-binding protein with serine-rich domain 1+ko03015//mRNA surveillance pathway+ko03013//RNA transport;K14325//RNA-binding protein with serine-rich domain 1+ko03015//mRNA surveillance pathway+ko03013//RNA transport;K12130//pseudo-response regulator 5+ko04712//C…	CCT motif		hypothetical protein BU14_0066s0031 [Porphyra umbilicalis]	[K] KOG1601 GATA-4/5/6 transcription factors	Zinc finger protein CONSTANS-LIKE 4 OS=Arabidopsis thaliana GN=COL4 PE=2 SV=2
CL7147.Contig1_All	2398	ko03015//mRNA surveillance pathway;ko03013//RNA transport	Genetic Information Processing	Translation	1.97727	1.20281e-279	4.36413e-281	K02184//formin 2;K02184//formin 2;K02184//formin 2;K14325//RNA-binding protein with serine-rich domain 1+ko03015//mRNA surveillance pathway+ko03013//RNA transport;K14325//RNA-binding protein with serine-rich domain 1+ko03015//mRNA surveillance pathway+ko03013//RNA transport	Domain of unknown function (DUF1127)		hypothetical protein SELMODRAFT_438863 [Selaginella moellendorffii] >EFJ34497.1 hypothetical protein SELMODRAFT_438863 [Selaginella moellendorffii]	[TZ] KOG3671 Actin regulatory protein (Wiskott-Aldrich syndrome protein)	Formin-like protein 16 OS=Oryza sativa subsp. japonica GN=FH16 PE=2 SV=1
CL2757.Contig2_All	733	ko03013//RNA transport;ko03008//Ribosome biogenesis in eukaryotes	Genetic Information Processing	Translation	1.9728	1.15185e-16	3.31907e-17	K03538//ribonuclease P protein subunit POP4 [EC:3.1.26.5]+ko03013//RNA transport+ko03008//Ribosome biogenesis in eukaryotes;K03538//ribonuclease P protein subunit POP4 [EC:3.1.26.5]+ko03013//RNA transport+ko03008//Ribosome biogenesis in eukaryotes;K03538//ribonuclease P protein subunit POP4 [EC:3.1.26.5]+ko03013//RNA transport+ko03008//Ribosome biogenesis in eukaryotes;K03538//ribonuclease P prot…	Domain of unknown function UPF0086		hypothetical protein CDL15_Pgr024751 [Punica granatum]	[A] KOG4046 RNase MRP and P, subunit POP4/p29		GO:0000172//ribonuclease MRP complex;GO:0003723//RNA binding;GO:0005655//nucleolar ribonuclease P complex;GO:0006379//mRNA cleavage;GO:0006364//rRNA processing;GO:0004540//ribonuclease activity;GO:0008033//tRNA processing
CL192.Contig7_All	1621	ko03013//RNA transport;ko03015//mRNA surveillance pathway	Genetic Information Processing	Translation	1.96695	5.45994e-27	1.13359e-27	K13171//serine/arginine repetitive matrix protein 1+ko03015//mRNA surveillance pathway+ko03013//RNA transport;K13171//serine/arginine repetitive matrix protein 1+ko03015//mRNA surveillance pathway+ko03013//RNA transport;K13171//serine/arginine repetitive matrix protein 1+ko03015//mRNA surveillance pathway+ko03013//RNA transport;K13171//serine/arginine repetitive matrix protein 1+ko03015//mRNA sur…	TRIC channel		hypothetical protein BU14_0141s0019 [Porphyra umbilicalis]
CL3200.Contig2_All	3031	ko03013//RNA transport	Genetic Information Processing	Translation	1.94334	3.26296e-29	6.42543e-30	K14306//nuclear pore complex protein Nup62+ko03013//RNA transport;K14306//nuclear pore complex protein Nup62+ko03013//RNA transport;K15168//mediator of RNA polymerase II transcription subunit 25;K14306//nuclear pore complex protein Nup62+ko03013//RNA transport;K15168//mediator of RNA polymerase II transcription subunit 25	Receptor-binding protein of phage tail base-plate Siphoviridae, head		hypothetical protein THAPSDRAFT_21646 [Thalassiosira pseudonana CCMP1335] >EED94146.1 hypothetical protein THAPSDRAFT_21646 [Thalassiosira pseudonana CCMP1335]	[A] KOG1869 Splicing coactivator SRm160/300, subunit SRm300	Alpha/beta-gliadin clone PW8142 OS=Triticum aestivum PE=3 SV=1
Unigene38909_All	1325	ko03040//Spliceosome;ko00940//Phenylpropanoid biosynthesis;ko03013//RNA transport;ko01110//Biosynthesis of secondary metabolites;ko01100//Metabolic pathways;ko03015//mRNA surveillance pathway	Genetic Information Processing;Metabolism	Translation;Global and overview maps;Biosynthesis of other secondary metabolites;Transcription	1.92712	1.6337e-08	7.29274e-09	K12875//apoptotic chromatin condensation inducer in the nucleus+ko03040//Spliceosome+ko03015//mRNA surveillance pathway+ko03013//RNA transport;K00430//peroxidase [EC:1.11.1.7]+ko01100//Metabolic pathways+ko01110//Biosynthesis of secondary metabolites+ko00940//Phenylpropanoid biosynthesis;K00430//peroxidase [EC:1.11.1.7]+ko01100//Metabolic pathways+ko01110//Biosynthesis of secondary metabolites+ko…			similar to hedgehog protein [Cyanidioschyzon merolae strain 10D] >BAM79710.1 similar to hedgehog protein [Cyanidioschyzon merolae strain 10D]	[T] KOG4743 Cyclin-dependent kinase inhibitor	Anther-specific proline-rich protein APG OS=Arabidopsis thaliana GN=APG PE=2 SV=2	GO:0016539//intein-mediated protein splicing;GO:0008233//peptidase activity;GO:0016021//integral component of membrane
Unigene35856_All	401	ko03013//RNA transport;ko03015//mRNA surveillance pathway	Genetic Information Processing	Translation	1.90419	1.04659e-05	6.06833e-06	K13171//serine/arginine repetitive matrix protein 1+ko03015//mRNA surveillance pathway+ko03013//RNA transport;K14325//RNA-binding protein with serine-rich domain 1+ko03015//mRNA surveillance pathway+ko03013//RNA transport;K14325//RNA-binding protein with serine-rich domain 1+ko03015//mRNA surveillance pathway+ko03013//RNA transport;K14325//RNA-binding protein with serine-rich domain 1+ko03015//mR…			expressed protein, partial [Aureococcus anophagefferens] >EGB05809.1 expressed protein, partial [Aureococcus anophagefferens]	[ZR] LSE0118 A Protein possibly involved in cytoskeleton rearrangements, contains FH domain	Formin-like protein 14 OS=Arabidopsis thaliana GN=FH14 PE=3 SV=3	GO:0005509//calcium ion binding
Unigene46532_All	898	ko03013//RNA transport	Genetic Information Processing	Translation	1.87718	1.3939e-11	5.08859e-12	K14306//nuclear pore complex protein Nup62+ko03013//RNA transport	Ubiquitin interaction motif		hypothetical protein GUITHDRAFT_101317 [Guillardia theta CCMP2712] >EKX52864.1 hypothetical protein GUITHDRAFT_101317 [Guillardia theta CCMP2712]	[K] KOG0487 Transcription factor Abd-B, contains HOX domain		GO:0050825//ice binding;GO:0016021//integral component of membrane
CL10770.Contig1_All	2258	ko03015//mRNA surveillance pathway;ko03013//RNA transport	Genetic Information Processing	Translation	1.80129	3.45163e-47	4.84833e-48	K14325//RNA-binding protein with serine-rich domain 1+ko03015//mRNA surveillance pathway+ko03013//RNA transport;K04733//interleukin-1 receptor-associated kinase 4 [EC:2.7.11.1];K14325//RNA-binding protein with serine-rich domain 1+ko03015//mRNA surveillance pathway+ko03013//RNA transport	Anaerobic c4-dicarboxylate membrane transporter		hypothetical protein AK812_SmicGene16059 [Symbiodinium microadriaticum]	[E] KOG3627 Trypsin
Unigene39003_All	788	ko03013//RNA transport	Genetic Information Processing	Translation	1.74028	7.52457e-07	3.86591e-07	K00784//ribonuclease Z [EC:3.1.26.11]+ko03013//RNA transport;K00784//ribonuclease Z [EC:3.1.26.11]+ko03013//RNA transport;K00784//ribonuclease Z [EC:3.1.26.11]+ko03013//RNA transport;K00784//ribonuclease Z [EC:3.1.26.11]+ko03013//RNA transport;K00784//ribonuclease Z [EC:3.1.26.11]+ko03013//RNA transport	PIF1-like helicase		RNase Z-like protein [Nannochloropsis gaditana]	[R] KOG2121 Predicted metal-dependent hydrolase (beta-lactamase superfamily)	tRNase Z TRZ3, mitochondrial OS=Arabidopsis thaliana GN=TRZ3 PE=1 SV=1	GO:0016891//endoribonuclease activity, producing 5'-phosphomonoesters;GO:0042779//tRNA 3'-trailer cleavage
CL5847.Contig6_All	2566	ko03013//RNA transport;ko03015//mRNA surveillance pathway;ko00480//Glutathione metabolism;ko04144//Endocytosis;ko01100//Metabolic pathways	Genetic Information Processing;Metabolism;Cellular Processes	Global and overview maps;Metabolism of other amino acids;Transport and catabolism;Translation	1.71765	3.56597e-11	1.33342e-11	K01255//leucyl aminopeptidase [EC:3.4.11.1]+ko01100//Metabolic pathways+ko00480//Glutathione metabolism;K05747//Wiskott-Aldrich syndrome protein+ko04144//Endocytosis;K14325//RNA-binding protein with serine-rich domain 1+ko03015//mRNA surveillance pathway+ko03013//RNA transport;K02184//formin 2	Cyclin		hypothetical protein FisN_4Lh178 [Fistulifera solaris]	[R] KOG1674 Cyclin	Cyclin-U3-1 OS=Arabidopsis thaliana GN=CYCU3-1 PE=1 SV=2	GO:0008080//N-acetyltransferase activity;GO:0000079//regulation of cyclin-dependent protein serine/threonine kinase activity;GO:0019901//protein kinase binding
Unigene34788_All	741	ko03013//RNA transport;ko03015//mRNA surveillance pathway	Genetic Information Processing	Translation	1.71525	1.25783e-61	1.45944e-62	K02184//formin 2;K02184//formin 2;K13171//serine/arginine repetitive matrix protein 1+ko03015//mRNA surveillance pathway+ko03013//RNA transport;K13171//serine/arginine repetitive matrix protein 1+ko03015//mRNA surveillance pathway+ko03013//RNA transport	Protein of unknown function (DUF861)		surfeit locus 1 family protein [Fistulifera solaris]	[A] KOG1869 Splicing coactivator SRm160/300, subunit SRm300	Formin-like protein 16 OS=Oryza sativa subsp. japonica GN=FH16 PE=2 SV=1
Unigene34481_All	960	ko01100//Metabolic pathways;ko03015//mRNA surveillance pathway;ko01110//Biosynthesis of secondary metabolites;ko03013//RNA transport;ko00940//Phenylpropanoid biosynthesis	Genetic Information Processing;Metabolism	Translation;Global and overview maps;Biosynthesis of other secondary metabolites	1.70413	1.20578e-26	2.52818e-27	K14325//RNA-binding protein with serine-rich domain 1+ko03015//mRNA surveillance pathway+ko03013//RNA transport;K00430//peroxidase [EC:1.11.1.7]+ko01100//Metabolic pathways+ko01110//Biosynthesis of secondary metabolites+ko00940//Phenylpropanoid biosynthesis;K14325//RNA-binding protein with serine-rich domain 1+ko03015//mRNA surveillance pathway+ko03013//RNA transport;K14325//RNA-binding protein w…	Tyrosine phosphatase family		hypothetical protein GPECTOR_1g311 [Gonium pectorale]	[AR] KOG2146 Splicing coactivator SRm160/300, subunit SRm160 (contains PWI domain)	Formin-like protein 16 OS=Oryza sativa subsp. japonica GN=FH16 PE=2 SV=1
Unigene41373_All	922	ko03040//Spliceosome;ko03013//RNA transport;ko03015//mRNA surveillance pathway	Genetic Information Processing	Translation;Transcription	1.69898	2.17116e-178	1.1419e-179	K12881//THO complex subunit 4+ko03040//Spliceosome+ko03015//mRNA surveillance pathway+ko03013//RNA transport	Apoptosis inhibitory protein 5 (API5)		hypothetical protein CICLE_v10012354mg [Citrus clementina] >ESR43820.1 hypothetical protein CICLE_v10012354mg [Citrus clementina]
CL10957.Contig1_All	3235	ko03013//RNA transport;ko03015//mRNA surveillance pathway	Genetic Information Processing	Translation	1.69891	9.20678e-108	7.1161e-109	K14325//RNA-binding protein with serine-rich domain 1+ko03015//mRNA surveillance pathway+ko03013//RNA transport;K14325//RNA-binding protein with serine-rich domain 1+ko03015//mRNA surveillance pathway+ko03013//RNA transport;K14325//RNA-binding protein with serine-rich domain 1+ko03015//mRNA surveillance pathway+ko03013//RNA transport;K14325//RNA-binding protein with serine-rich domain 1+ko03015//…	Common central domain of tyrosinase		hypothetical protein BU14_0066s0031 [Porphyra umbilicalis]	[Z] KOG1830 Wiskott Aldrich syndrome proteins	Formin-like protein 6 OS=Oryza sativa subsp. japonica GN=FH6 PE=2 SV=2
Unigene30444_All	1487	ko03013//RNA transport	Genetic Information Processing	Translation	1.6974	6.45019e-09	2.79514e-09	K14306//nuclear pore complex protein Nup62+ko03013//RNA transport;K14306//nuclear pore complex protein Nup62+ko03013//RNA transport;K14306//nuclear pore complex protein Nup62+ko03013//RNA transport;K14306//nuclear pore complex protein Nup62+ko03013//RNA transport;K14306//nuclear pore complex protein Nup62+ko03013//RNA transport	Helix-hairpin-helix motif		mucin, putative [Phytophthora infestans T30-4] >EEY68164.1 mucin, putative [Phytophthora infestans T30-4]	[Y] KOG2992 Nucleolar GTPase/ATPase p130	Pentatricopeptide repeat-containing protein At3g13150 OS=Arabidopsis thaliana GN=At3g13150 PE=2 SV=1	GO:0055085//transmembrane transport;GO:0016021//integral component of membrane
Unigene41966_All	624	ko03008//Ribosome biogenesis in eukaryotes;ko03013//RNA transport	Genetic Information Processing	Translation	1.69641	1.51117e-52	1.95885e-53	K03243//translation initiation factor 5B+ko03013//RNA transport;K11131//H/ACA ribonucleoprotein complex subunit 4 [EC:5.4.99.-]+ko03008//Ribosome biogenesis in eukaryotes;K13118//protein DGCR14	Signal recognition particle, alpha subunit, N-terminal		hypothetical protein AK812_SmicGene22574 [Symbiodinium microadriaticum]	[J] KOG2529 Pseudouridine synthase	H/ACA ribonucleoprotein complex subunit 4 OS=Arabidopsis thaliana GN=CBF5 PE=1 SV=1
Unigene40421_All	1909	ko03015//mRNA surveillance pathway;ko03013//RNA transport;ko01100//Metabolic pathways;ko00940//Phenylpropanoid biosynthesis;ko01110//Biosynthesis of secondary metabolites	Metabolism;Genetic Information Processing	Translation;Global and overview maps;Biosynthesis of other secondary metabolites	1.69468	2.70582e-15	8.2447e-16	K22020//mucin-19;K13171//serine/arginine repetitive matrix protein 1+ko03015//mRNA surveillance pathway+ko03013//RNA transport;K00430//peroxidase [EC:1.11.1.7]+ko01100//Metabolic pathways+ko01110//Biosynthesis of secondary metabolites+ko00940//Phenylpropanoid biosynthesis	Sulfatase		putative arylsulfatase [Aureococcus anophagefferens] >EGB08169.1 putative arylsulfatase [Aureococcus anophagefferens]	[R] KOG3867 Sulfatase		GO:0008152//metabolic process;GO:0008484//sulfuric ester hydrolase activity;GO:0016021//integral component of membrane
Unigene23294_All	951	ko03013//RNA transport;ko03015//mRNA surveillance pathway	Genetic Information Processing	Translation	1.68504	2.36519e-32	4.35928e-33	K13171//serine/arginine repetitive matrix protein 1+ko03015//mRNA surveillance pathway+ko03013//RNA transport	Fungal Zn(2)-Cys(6) binuclear cluster domain		hypothetical protein AURANDRAFT_62296 [Aureococcus anophagefferens] >EGB10965.1 hypothetical protein AURANDRAFT_62296 [Aureococcus anophagefferens]
Unigene165_All	3349	ko03013//RNA transport;ko03015//mRNA surveillance pathway;ko04145//Phagosome;ko03060//Protein export;ko04141//Protein processing in endoplasmic reticulum	Cellular Processes;Genetic Information Processing	Transport and catabolism;Translation;Folding, sorting and degradation	1.64104	1.63894e-104	1.29908e-105	K10956//protein transport protein SEC61 subunit alpha+ko04145//Phagosome+ko04141//Protein processing in endoplasmic reticulum+ko03060//Protein export;K13171//serine/arginine repetitive matrix protein 1+ko03015//mRNA surveillance pathway+ko03013//RNA transport;K22020//mucin-19;K17987//next to BRCA1 gene 1 protein;K13171//serine/arginine repetitive matrix protein 1+ko03015//mRNA surveillance pathwa…			hypothetical protein AURANDRAFT_70714, partial [Aureococcus anophagefferens] >EGB12011.1 hypothetical protein AURANDRAFT_70714, partial [Aureococcus anophagefferens]	[A] KOG1869 Splicing coactivator SRm160/300, subunit SRm300
CL7841.Contig3_All	2605	ko03013//RNA transport	Genetic Information Processing	Translation	1.63854	2.19664e-13	7.29187e-14	K14306//nuclear pore complex protein Nup62+ko03013//RNA transport;K14306//nuclear pore complex protein Nup62+ko03013//RNA transport;K14306//nuclear pore complex protein Nup62+ko03013//RNA transport;K14306//nuclear pore complex protein Nup62+ko03013//RNA transport;K14306//nuclear pore complex protein Nup62+ko03013//RNA transport	Putative metal-binding motif		hypothetical protein FisN_20Lu281 [Fistulifera solaris]	[GO] KOG4157 beta-1,6-N-acetylglucosaminyltransferase, contains WSC domain	Nuclear pore complex protein NUP62 OS=Arabidopsis thaliana GN=NUP62 PE=1 SV=1
CL8109.Contig1_All	790	ko03013//RNA transport	Genetic Information Processing	Translation	1.62267	1.63045e-05	9.64518e-06	K14317//nuclear pore complex protein Nup214+ko03013//RNA transport			transcriptional regulatory protein algP precursor [Zea mays] >ACG40331.1 transcriptional regulatory protein algP [Zea mays]		Vegetative cell wall protein gp1 OS=Chlamydomonas reinhardtii GN=GP1 PE=1 SV=1
CL10414.Contig2_All	3715	ko03013//RNA transport	Genetic Information Processing	Translation	1.62028	1.36546e-245	5.57491e-247	K22020//mucin-19;K16628//collagen, type VII, alpha;K14306//nuclear pore complex protein Nup62+ko03013//RNA transport	HCO3- transporter family		probable anion transporter [Chondrus crispus] >CDF37543.1 probable anion transporter [Chondrus crispus]	[P] KOG1172 Na+-independent Cl/HCO3 exchanger AE1 and related transporters (SLC4 family)	Holliday junction resolvase MOC1, chloroplastic OS=Chlamydomonas reinhardtii GN=MOC1 PE=3 SV=2	GO:0005452//inorganic anion exchanger activity;GO:0016021//integral component of membrane
Unigene47930_All	1609	ko03015//mRNA surveillance pathway;ko03013//RNA transport	Genetic Information Processing	Translation	1.60713	5.07649e-162	2.89557e-163	K22020//mucin-19;K14325//RNA-binding protein with serine-rich domain 1+ko03015//mRNA surveillance pathway+ko03013//RNA transport;K14325//RNA-binding protein with serine-rich domain 1+ko03015//mRNA surveillance pathway+ko03013//RNA transport;K16628//collagen, type VII, alpha	Domain of unknown function (DUF4743)		Nudix hydrolase 20, chloroplastic [Auxenochlorella protothecoides] >KFM22726.1 Nudix hydrolase 20, chloroplastic [Auxenochlorella protothecoides]	[F] KOG4313 Thiamine pyrophosphokinase	Nudix hydrolase 20, chloroplastic OS=Arabidopsis thaliana GN=NUDT20 PE=2 SV=1	GO:0016787//hydrolase activity
CL5939.Contig2_All	2364	ko03015//mRNA surveillance pathway;ko03013//RNA transport	Genetic Information Processing	Translation	1.587	2.30131e-33	4.14619e-34	K14325//RNA-binding protein with serine-rich domain 1+ko03015//mRNA surveillance pathway+ko03013//RNA transport;K11275//histone H1/5;K11275//histone H1/5	Glycosyltransferase like family 2	XM_020259556.1 PREDICTED: Ananas comosus uncharacterized LOC109728978 (LOC109728978), transcript variant X4, mRNA	hypothetical protein F775_01966 [Aegilops tauschii]	[J] KOG3434 60S ribosomal protein L22	Proline-rich receptor-like protein kinase PERK8 OS=Arabidopsis thaliana GN=PERK8 PE=1 SV=1	GO:0016021//integral component of membrane
CL6580.Contig2_All	1562	ko03015//mRNA surveillance pathway;ko03013//RNA transport	Genetic Information Processing	Translation	1.57678	2.28136e-49	3.09531e-50	K22020//mucin-19;K19984//exocyst complex component 5;K02184//formin 2;K11593//eukaryotic translation initiation factor 2C;K14325//RNA-binding protein with serine-rich domain 1+ko03015//mRNA surveillance pathway+ko03013//RNA transport			hypothetical protein EMIHUDRAFT_462069 [Emiliania huxleyi CCMP1516] >EOD41299.1 hypothetical protein EMIHUDRAFT_462069 [Emiliania huxleyi CCMP1516]	[W] KOG3544 Collagens (type IV and type XIII), and related proteins	Formin-like protein 18 OS=Oryza sativa subsp. japonica GN=FH18 PE=2 SV=1
Unigene19295_All	1008	ko03013//RNA transport;ko01100//Metabolic pathways;ko00040//Pentose and glucuronate interconversions	Genetic Information Processing;Metabolism	Translation;Carbohydrate metabolism;Global and overview maps	1.56986	2.19524e-23	5.00501e-24	K01414//oligopeptidase A [EC:3.4.24.70];K14306//nuclear pore complex protein Nup62+ko03013//RNA transport;K17987//next to BRCA1 gene 1 protein;K01051//pectinesterase [EC:3.1.1.11]+ko00040//Pentose and glucuronate interconversions+ko01100//Metabolic pathways	SAP domain		hypothetical protein Csa_3G011630 [Cucumis sativus]	[Y] KOG2992 Nucleolar GTPase/ATPase p130	Pentatricopeptide repeat-containing protein At3g13150 OS=Arabidopsis thaliana GN=At3g13150 PE=2 SV=1
CL9260.Contig8_All	1355	ko03015//mRNA surveillance pathway;ko03013//RNA transport	Genetic Information Processing	Translation	1.54699	1.73953e-13	5.75208e-14	K14325//RNA-binding protein with serine-rich domain 1+ko03015//mRNA surveillance pathway+ko03013//RNA transport;K14325//RNA-binding protein with serine-rich domain 1+ko03015//mRNA surveillance pathway+ko03013//RNA transport;K14325//RNA-binding protein with serine-rich domain 1+ko03015//mRNA surveillance pathway+ko03013//RNA transport;K02184//formin 2	Kinase associated domain 1		hypothetical protein BU14_0147s0014 [Porphyra umbilicalis]	[T] KOG0507 CASK-interacting adaptor protein (caskin) and related proteins with ankyrin repeats and SAM domain	Sulfated surface glycoprotein 185 OS=Volvox carteri PE=1 SV=1
Unigene45444_All	1872	ko03013//RNA transport;ko03015//mRNA surveillance pathway	Genetic Information Processing	Translation	1.53375	0	0	K22020//mucin-19;K16628//collagen, type VII, alpha;K14325//RNA-binding protein with serine-rich domain 1+ko03015//mRNA surveillance pathway+ko03013//RNA transport	Sugar-tranasporters, 12 TM		hypothetical protein THAPSDRAFT_261403, partial [Thalassiosira pseudonana CCMP1335] >EED94785.1 hypothetical protein THAPSDRAFT_261403, partial [Thalassiosira pseudonana CCMP1335]	[G] KOG4332 Predicted sugar transporter		GO:0016021//integral component of membrane;GO:0015098//molybdate ion transmembrane transporter activity
CL4471.Contig5_All	1519	ko03015//mRNA surveillance pathway;ko03013//RNA transport	Genetic Information Processing	Translation	1.51042	7.87714e-09	3.43472e-09	K13171//serine/arginine repetitive matrix protein 1+ko03015//mRNA surveillance pathway+ko03013//RNA transport	Mediator of RNA pol II transcription subunit 19		conserved unknown protein [Ectocarpus siliculosus]
CL2720.Contig3_All	2666	ko03013//RNA transport;ko03015//mRNA surveillance pathway	Genetic Information Processing	Translation	1.49014	5.12177e-26	1.08996e-26	K13171//serine/arginine repetitive matrix protein 1+ko03015//mRNA surveillance pathway+ko03013//RNA transport;K13171//serine/arginine repetitive matrix protein 1+ko03015//mRNA surveillance pathway+ko03013//RNA transport;K14325//RNA-binding protein with serine-rich domain 1+ko03015//mRNA surveillance pathway+ko03013//RNA transport;K13171//serine/arginine repetitive matrix protein 1+ko03015//mRNA s…	4Fe-4S dicluster domain		Hypothetical Protein RRSL_02205 [Ectocarpus siliculosus]	[A] KOG1869 Splicing coactivator SRm160/300, subunit SRm300
CL366.Contig4_All	3457	ko03040//Spliceosome;ko01100//Metabolic pathways;ko03013//RNA transport;ko00940//Phenylpropanoid biosynthesis;ko01110//Biosynthesis of secondary metabolites;ko03015//mRNA surveillance pathway	Genetic Information Processing;Metabolism	Biosynthesis of other secondary metabolites;Global and overview maps;Translation;Transcription	1.47646	1.9711e-21	4.76316e-22	K10990//RecQ-mediated genome instability protein 1;K12875//apoptotic chromatin condensation inducer in the nucleus+ko03040//Spliceosome+ko03015//mRNA surveillance pathway+ko03013//RNA transport;K03163//DNA topoisomerase I [EC:5.99.1.2];K10990//RecQ-mediated genome instability protein 1;K00430//peroxidase [EC:1.11.1.7]+ko01100//Metabolic pathways+ko01110//Biosynthesis of secondary metabolites+ko00…	PT repeat		Cyst germination specific acidic repeat protein precursor, partial [Phytophthora megakarya]	[LR] LSE0097 Y DNA helicase	Classical arabinogalactan protein 10 OS=Arabidopsis thaliana GN=AGP10 PE=1 SV=1	GO:0016539//intein-mediated protein splicing;GO:0008233//peptidase activity;GO:0016021//integral component of membrane
Unigene28167_All	1565	ko03013//RNA transport	Genetic Information Processing	Translation	1.47219	1.0072e-15	3.0153e-16	K03246//translation initiation factor 3 subunit I+ko03013//RNA transport;K03246//translation initiation factor 3 subunit I+ko03013//RNA transport;K03246//translation initiation factor 3 subunit I+ko03013//RNA transport;K03246//translation initiation factor 3 subunit I+ko03013//RNA transport;K03246//translation initiation factor 3 subunit I+ko03013//RNA transport	WD domain, G-beta repeat		hypothetical protein AURANDRAFT_59091 [Aureococcus anophagefferens] >EGB07692.1 hypothetical protein AURANDRAFT_59091 [Aureococcus anophagefferens]	[JT] KOG0643 Translation initiation factor 3, subunit i (eIF-3i)/TGF-beta receptor-interacting protein (TRIP-1)	Eukaryotic translation initiation factor 3 subunit I OS=Arabidopsis thaliana GN=TIF3I1 PE=2 SV=2	GO:0016282//eukaryotic 43S preinitiation complex;GO:0006446//regulation of translational initiation;GO:0003743//translation initiation factor activity;GO:0033290//eukaryotic 48S preinitiation complex;GO:0005852//eukaryotic translation initiation factor 3 complex;GO:0001731//formation of translation preinitiation complex
CL8357.Contig1_All	1798	ko03013//RNA transport;ko00520//Amino sugar and nucleotide sugar metabolism;ko01110//Biosynthesis of secondary metabolites;ko00940//Phenylpropanoid biosynthesis;ko04016//MAPK signaling pathway - plant;ko01100//Metabolic pathways;ko03015//mRNA surveillance pathway	Environmental Information Processing;Genetic Information Processing;Metabolism	Biosynthesis of other secondary metabolites;Translation;Carbohydrate metabolism;Global and overview maps;Signal transduction	1.45844	9.70639e-115	7.1372e-116	K05740//diaphanous 1+ko04933//AGE-RAGE signaling pathway in diabetic complications;K20547//basic endochitinase B [EC:3.2.1.14]+ko04016//MAPK signaling pathway - plant+ko00520//Amino sugar and nucleotide sugar metabolism+ko01100//Metabolic pathways;K14325//RNA-binding protein with serine-rich domain 1+ko03015//mRNA surveillance pathway+ko03013//RNA transport;K00430//peroxidase [EC:1.11.1.7]+ko0110…	Common central domain of tyrosinase		Hypothetical tyrosinase-like protein F21C3.2 in chromosome I, putative [Ectocarpus siliculosus]	[AR] KOG2146 Splicing coactivator SRm160/300, subunit SRm160 (contains PWI domain)	Sulfated surface glycoprotein 185 OS=Volvox carteri PE=1 SV=1	GO:0046872//metal ion binding;GO:0016787//hydrolase activity;GO:0016491//oxidoreductase activity
Unigene48307_All	1981	ko03015//mRNA surveillance pathway;ko03013//RNA transport	Genetic Information Processing	Translation	1.45706	6.9065e-105	5.45207e-106	K14325//RNA-binding protein with serine-rich domain 1+ko03015//mRNA surveillance pathway+ko03013//RNA transport;K14325//RNA-binding protein with serine-rich domain 1+ko03015//mRNA surveillance pathway+ko03013//RNA transport;K17987//next to BRCA1 gene 1 protein;K14325//RNA-binding protein with serine-rich domain 1+ko03015//mRNA surveillance pathway+ko03013//RNA transport	EGF-like domain		hypothetical protein PHYSODRAFT_523851 [Phytophthora sojae] >EGZ09926.1 hypothetical protein PHYSODRAFT_523851 [Phytophthora sojae]	[TW] KOG1225 Teneurin-1 and related extracellular matrix proteins, contain EGF-like repeats
CL2397.Contig2_All	2764	ko03013//RNA transport;ko03015//mRNA surveillance pathway;ko03040//Spliceosome	Genetic Information Processing	Transcription;Translation	1.43471	0	0	K22020//mucin-19;K13171//serine/arginine repetitive matrix protein 1+ko03015//mRNA surveillance pathway+ko03013//RNA transport;K12896//splicing factor, arginine/serine-rich 7+ko03040//Spliceosome;K19719//collagen, type II, alpha	RNA recognition motif. (a.k.a. RRM, RBD, or RNP domain)		hypothetical protein BU14_0141s0001 [Porphyra umbilicalis]	[A] KOG1869 Splicing coactivator SRm160/300, subunit SRm300
CL3147.Contig8_All	2165	ko03013//RNA transport	Genetic Information Processing	Translation	1.42909	6.14209e-09	2.65817e-09	K18213//proteinaceous RNase P [EC:3.1.26.5]+ko03013//RNA transport;K18213//proteinaceous RNase P [EC:3.1.26.5]+ko03013//RNA transport;K18213//proteinaceous RNase P [EC:3.1.26.5]+ko03013//RNA transport;K18213//proteinaceous RNase P [EC:3.1.26.5]+ko03013//RNA transport;K18213//proteinaceous RNase P [EC:3.1.26.5]+ko03013//RNA transport	Protein-only RNase P		hypothetical protein GUITHDRAFT_115425 [Guillardia theta CCMP2712] >EKX38459.1 hypothetical protein GUITHDRAFT_115425 [Guillardia theta CCMP2712]		Proteinaceous RNase P 1, chloroplastic/mitochondrial OS=Arabidopsis thaliana GN=PRORP1 PE=1 SV=1	GO:0005739//mitochondrion;GO:0008033//tRNA processing
CL8040.Contig2_All	1218	ko03013//RNA transport;ko03015//mRNA surveillance pathway	Genetic Information Processing	Translation	1.42307	7.02897e-07	3.60139e-07	K14325//RNA-binding protein with serine-rich domain 1+ko03015//mRNA surveillance pathway+ko03013//RNA transport;K14325//RNA-binding protein with serine-rich domain 1+ko03015//mRNA surveillance pathway+ko03013//RNA transport;K13171//serine/arginine repetitive matrix protein 1+ko03015//mRNA surveillance pathway+ko03013//RNA transport;K14325//RNA-binding protein with serine-rich domain 1+ko03015//mR…	Arylsulfotransferase (ASST)		hypothetical protein BU14_0504s0008 [Porphyra umbilicalis]	[Q] KOG1285 Beta, beta-carotene 15,15'-dioxygenase and related enzymes	Extensin OS=Zea mays GN=HRGP PE=2 SV=1
CL6882.Contig2_All	1184	ko03013//RNA transport;ko03015//mRNA surveillance pathway;ko04144//Endocytosis	Genetic Information Processing;Cellular Processes	Transport and catabolism;Translation	1.4173	1.78659e-09	7.43228e-10	K13171//serine/arginine repetitive matrix protein 1+ko03015//mRNA surveillance pathway+ko03013//RNA transport;K14325//RNA-binding protein with serine-rich domain 1+ko03015//mRNA surveillance pathway+ko03013//RNA transport;K05747//Wiskott-Aldrich syndrome protein+ko04144//Endocytosis;K10990//RecQ-mediated genome instability protein 1	Glycosyl transferase family 2		glycosyl transferase, group 2 family protein [Ectocarpus siliculosus]	[ZR] LSE0118 A Protein possibly involved in cytoskeleton rearrangements, contains FH domain	Formin-like protein 5 OS=Oryza sativa subsp. japonica GN=FH5 PE=2 SV=2
CL8226.Contig3_All	2445	ko03015//mRNA surveillance pathway;ko03013//RNA transport	Genetic Information Processing	Translation	1.4068	1.37723e-210	6.33207e-212	K22020//mucin-19;K19720//collagen, type III, alpha+ko04933//AGE-RAGE signaling pathway in diabetic complications;K02184//formin 2;K13171//serine/arginine repetitive matrix protein 1+ko03015//mRNA surveillance pathway+ko03013//RNA transport;K19719//collagen, type II, alpha	Sulfate permease family		sulfate transporter, partial [Chrysochromulina sp. CCMP291]	[AR] KOG2146 Splicing coactivator SRm160/300, subunit SRm160 (contains PWI domain)	Proline-rich receptor-like protein kinase PERK9 OS=Arabidopsis thaliana GN=PERK9 PE=1 SV=1
CL8640.Contig2_All	1846	ko03013//RNA transport;ko03015//mRNA surveillance pathway	Genetic Information Processing	Translation	1.40113	1.87981e-29	3.68019e-30	K14325//RNA-binding protein with serine-rich domain 1+ko03015//mRNA surveillance pathway+ko03013//RNA transport;K14325//RNA-binding protein with serine-rich domain 1+ko03015//mRNA surveillance pathway+ko03013//RNA transport;K14325//RNA-binding protein with serine-rich domain 1+ko03015//mRNA surveillance pathway+ko03013//RNA transport	PIG-P		hypothetical protein OsJ_25109 [Oryza sativa Japonica Group]
Unigene37966_All	696	ko03015//mRNA surveillance pathway;ko03013//RNA transport	Genetic Information Processing	Translation	1.39623	6.29088e-09	2.72421e-09	K14325//RNA-binding protein with serine-rich domain 1+ko03015//mRNA surveillance pathway+ko03013//RNA transport;K02184//formin 2;K14325//RNA-binding protein with serine-rich domain 1+ko03015//mRNA surveillance pathway+ko03013//RNA transport;K14325//RNA-binding protein with serine-rich domain 1+ko03015//mRNA surveillance pathway+ko03013//RNA transport;K14325//RNA-binding protein with serine-rich d…			hypothetical protein BU14_0312s0013 [Porphyra umbilicalis]	[TZ] KOG3671 Actin regulatory protein (Wiskott-Aldrich syndrome protein)	Leucine-rich repeat extensin-like protein 3 OS=Arabidopsis thaliana GN=LRX3 PE=1 SV=1
Unigene37438_All	1314	ko03008//Ribosome biogenesis in eukaryotes;ko03013//RNA transport	Genetic Information Processing	Translation	1.37741	2.75141e-19	7.15292e-20	K03539//ribonuclease P/MRP protein subunit RPP1 [EC:3.1.26.5]+ko03013//RNA transport+ko03008//Ribosome biogenesis in eukaryotes;K03539//ribonuclease P/MRP protein subunit RPP1 [EC:3.1.26.5]+ko03013//RNA transport+ko03008//Ribosome biogenesis in eukaryotes;K03539//ribonuclease P/MRP protein subunit RPP1 [EC:3.1.26.5]+ko03013//RNA transport+ko03008//Ribosome biogenesis in eukaryotes;K03539//ribonuc…	RNase P subunit p30		PREDICTED: uncharacterized protein LOC107814819 [Nicotiana tabacum]	[J] KOG2363 Protein subunit of nuclear ribonuclease P (RNase P)		GO:0004540//ribonuclease activity;GO:0008033//tRNA processing
Unigene5043_All	6466	ko01100//Metabolic pathways;ko00520//Amino sugar and nucleotide sugar metabolism;ko03015//mRNA surveillance pathway;ko03013//RNA transport;ko04016//MAPK signaling pathway - plant	Metabolism;Environmental Information Processing;Genetic Information Processing	Global and overview maps;Signal transduction;Carbohydrate metabolism;Translation	1.37408	2.56945e-166	1.42992e-167	K20547//basic endochitinase B [EC:3.2.1.14]+ko04016//MAPK signaling pathway - plant+ko00520//Amino sugar and nucleotide sugar metabolism+ko01100//Metabolic pathways;K17987//next to BRCA1 gene 1 protein;K02184//formin 2;K02184//formin 2;K14325//RNA-binding protein with serine-rich domain 1+ko03015//mRNA surveillance pathway+ko03013//RNA transport	Putative ephrin-receptor like		predicted protein [Micromonas commoda] >ACO63517.1 predicted protein [Micromonas commoda]		Sulfated surface glycoprotein 185 OS=Volvox carteri PE=1 SV=1
CL2776.Contig1_All	1425	ko03015//mRNA surveillance pathway;ko03013//RNA transport	Genetic Information Processing	Translation	1.36591	4.84011e-95	4.08952e-96	K14325//RNA-binding protein with serine-rich domain 1+ko03015//mRNA surveillance pathway+ko03013//RNA transport;K14325//RNA-binding protein with serine-rich domain 1+ko03015//mRNA surveillance pathway+ko03013//RNA transport;K14325//RNA-binding protein with serine-rich domain 1+ko03015//mRNA surveillance pathway+ko03013//RNA transport;K13171//serine/arginine repetitive matrix protein 1+ko03015//mR…	Eukaryotic porin		hypothetical protein BU14_1177s0001, partial [Porphyra umbilicalis]	[AR] KOG2146 Splicing coactivator SRm160/300, subunit SRm160 (contains PWI domain)	Vegetative cell wall protein gp1 OS=Chlamydomonas reinhardtii GN=GP1 PE=1 SV=1	GO:0005509//calcium ion binding
Unigene8286_All	3436	ko03015//mRNA surveillance pathway;ko03013//RNA transport	Genetic Information Processing	Translation	1.33258	0	0	K14325//RNA-binding protein with serine-rich domain 1+ko03015//mRNA surveillance pathway+ko03013//RNA transport;K14306//nuclear pore complex protein Nup62+ko03013//RNA transport;K14325//RNA-binding protein with serine-rich domain 1+ko03015//mRNA surveillance pathway+ko03013//RNA transport;K14325//RNA-binding protein with serine-rich domain 1+ko03015//mRNA surveillance pathway+ko03013//RNA transpo…	Immune inhibitor A peptidase M6		M6 metalloprotease [Fragilariopsis cylindrus CCMP1102]	[Q] KOG1285 Beta, beta-carotene 15,15'-dioxygenase and related enzymes
Unigene26922_All	1927	ko03015//mRNA surveillance pathway;ko03013//RNA transport	Genetic Information Processing	Translation	1.33119	0	0	K14325//RNA-binding protein with serine-rich domain 1+ko03015//mRNA surveillance pathway+ko03013//RNA transport;K14325//RNA-binding protein with serine-rich domain 1+ko03015//mRNA surveillance pathway+ko03013//RNA transport;K22020//mucin-19;K14325//RNA-binding protein with serine-rich domain 1+ko03015//mRNA surveillance pathway+ko03013//RNA transport;K14325//RNA-binding protein with serine-rich d…	bZIP transcription factor		basic leucine zipper domain-containing protein [Fragilariopsis cylindrus CCMP1102]	[W] KOG3544 Collagens (type IV and type XIII), and related proteins	Proline-rich receptor-like protein kinase PERK9 OS=Arabidopsis thaliana GN=PERK9 PE=1 SV=1
CL9667.Contig2_All	1552	ko03015//mRNA surveillance pathway;ko03013//RNA transport	Genetic Information Processing	Translation	1.32379	1.15739e-19	2.96978e-20	K14325//RNA-binding protein with serine-rich domain 1+ko03015//mRNA surveillance pathway+ko03013//RNA transport	TRIC channel		conserved unknown protein [Ectocarpus siliculosus]		Serine/arginine-rich splicing factor SR45 OS=Arabidopsis thaliana GN=SR45 PE=1 SV=1	GO:0016021//integral component of membrane
Unigene1513_All	407	ko00520//Amino sugar and nucleotide sugar metabolism;ko01100//Metabolic pathways;ko03013//RNA transport;ko00940//Phenylpropanoid biosynthesis;ko04016//MAPK signaling pathway - plant;ko01110//Biosynthesis of secondary metabolites;ko03015//mRNA surveillance pathway	Environmental Information Processing;Genetic Information Processing;Metabolism	Translation;Carbohydrate metabolism;Signal transduction;Biosynthesis of other secondary metabolites;Global and overview maps	1.30346	2.4818e-06	1.34156e-06	K02184//formin 2;K20547//basic endochitinase B [EC:3.2.1.14]+ko04016//MAPK signaling pathway - plant+ko00520//Amino sugar and nucleotide sugar metabolism+ko01100//Metabolic pathways;K14325//RNA-binding protein with serine-rich domain 1+ko03015//mRNA surveillance pathway+ko03013//RNA transport;K00430//peroxidase [EC:1.11.1.7]+ko01100//Metabolic pathways+ko01110//Biosynthesis of secondary metabolit…	Pentatricopeptide repeat domain		hypothetical protein BU14_0125s0002 [Porphyra umbilicalis]	[A] KOG1596 Fibrillarin and related nucleolar RNA-binding proteins	Formin-like protein 16 OS=Oryza sativa subsp. japonica GN=FH16 PE=2 SV=1
Unigene33847_All	1878	ko03013//RNA transport;ko03018//RNA degradation;ko03015//mRNA surveillance pathway;ko03040//Spliceosome	Genetic Information Processing	Folding, sorting and degradation;Translation;Transcription	1.28605	8.52245e-69	9.09657e-70	K12614//ATP-dependent RNA helicase DDX6/DHH1 [EC:3.6.4.13]+ko03018//RNA degradation;K14777//ATP-dependent RNA helicase DDX47/RRP3 [EC:3.6.4.13];K13025//ATP-dependent RNA helicase [EC:3.6.4.13]+ko03040//Spliceosome+ko03015//mRNA surveillance pathway+ko03013//RNA transport;K14777//ATP-dependent RNA helicase DDX47/RRP3 [EC:3.6.4.13];K13025//ATP-dependent RNA helicase [EC:3.6.4.13]+ko03040//Spliceoso…	DEAD/DEAH box helicase		DEAD box helicase [Ectocarpus siliculosus]	[J] KOG0327 Translation initiation factor 4F, helicase subunit (eIF-4A) and related helicases	DEAD-box ATP-dependent RNA helicase 58, chloroplastic OS=Arabidopsis thaliana GN=RH58 PE=2 SV=1	GO:0004004//ATP-dependent RNA helicase activity;GO:0005524//ATP binding;GO:0005730//nucleolus;GO:0010501//RNA secondary structure unwinding;GO:0006364//rRNA processing;GO:0005737//cytoplasm;GO:0003676//nucleic acid binding
Unigene87309_All	1021	ko03013//RNA transport;ko03015//mRNA surveillance pathway;ko04016//MAPK signaling pathway - plant;ko00520//Amino sugar and nucleotide sugar metabolism;ko01100//Metabolic pathways	Genetic Information Processing;Environmental Information Processing;Metabolism	Global and overview maps;Translation;Carbohydrate metabolism;Signal transduction	1.27521	9.05984e-17	2.60148e-17	K16628//collagen, type VII, alpha;K14325//RNA-binding protein with serine-rich domain 1+ko03015//mRNA surveillance pathway+ko03013//RNA transport;K20547//basic endochitinase B [EC:3.2.1.14]+ko04016//MAPK signaling pathway - plant+ko00520//Amino sugar and nucleotide sugar metabolism+ko01100//Metabolic pathways;K14325//RNA-binding protein with serine-rich domain 1+ko03015//mRNA surveillance pathway…	SPFH domain / Band 7 family		conserved unknown protein [Ectocarpus siliculosus]	[ZR] LSE0118 A Protein possibly involved in cytoskeleton rearrangements, contains FH domain	Formin-like protein 16 OS=Oryza sativa subsp. japonica GN=FH16 PE=2 SV=1
CL3427.Contig5_All	1974	ko00562//Inositol phosphate metabolism;ko03013//RNA transport;ko01210//2-Oxocarboxylic acid metabolism;ko01230//Biosynthesis of amino acids;ko01100//Metabolic pathways;ko04070//Phosphatidylinositol signaling system;ko01110//Biosynthesis of secondary metabolites;ko00770//Pantothenate and CoA biosynthesis;ko00290//Valine, leucine and isoleucine biosynthesis	Metabolism;Environmental Information Processing;Genetic Information Processing	Translation;Signal transduction;Metabolism of cofactors and vitamins;Global and overview maps;Amino acid metabolism;Carbohydrate metabolism	1.26972	5.82194e-103	4.66031e-104	K05857//phosphatidylinositol phospholipase C, delta [EC:3.1.4.11]+ko01100//Metabolic pathways+ko04933//AGE-RAGE signaling pathway in diabetic complications+ko04070//Phosphatidylinositol signaling system+ko00562//Inositol phosphate metabolism;K00053//ketol-acid reductoisomerase [EC:1.1.1.86]+ko00290//Valine, leucine and isoleucine biosynthesis+ko00770//Pantothenate and CoA biosynthesis+ko01230//Bi…	NUMOD3 motif (2 copies)		predicted protein [Phaeodactylum tricornutum CCAP 1055/1] >EEC47469.1 predicted protein [Phaeodactylum tricornutum CCAP 1055/1]			GO:0003677//DNA binding
CL2757.Contig5_All	883	ko03008//Ribosome biogenesis in eukaryotes;ko03013//RNA transport	Genetic Information Processing	Translation	1.25993	2.22718e-06	1.19851e-06	K03538//ribonuclease P protein subunit POP4 [EC:3.1.26.5]+ko03013//RNA transport+ko03008//Ribosome biogenesis in eukaryotes	Domain of unknown function UPF0086		conserved unknown protein [Ectocarpus siliculosus]	[A] KOG4046 RNase MRP and P, subunit POP4/p29
Unigene12873_All	2651	ko03013//RNA transport	Genetic Information Processing	Translation	1.24344	1.55601e-169	8.53731e-171	K14306//nuclear pore complex protein Nup62+ko03013//RNA transport;K14306//nuclear pore complex protein Nup62+ko03013//RNA transport	Chaperone of endosialidase		hypothetical protein COCSUDRAFT_40018 [Coccomyxa subellipsoidea C-169] >EIE25737.1 hypothetical protein COCSUDRAFT_40018 [Coccomyxa subellipsoidea C-169]	[LR] LSE0097 Y DNA helicase		GO:0030246//carbohydrate binding
Unigene10112_All	1710	ko03013//RNA transport;ko03015//mRNA surveillance pathway	Genetic Information Processing	Translation	1.23357	2.53492e-156	1.48973e-157	K14325//RNA-binding protein with serine-rich domain 1+ko03015//mRNA surveillance pathway+ko03013//RNA transport	Phytanoyl-CoA dioxygenase (PhyH)		LOW QUALITY PROTEIN: hypothetical protein MICPUN_114046 [Micromonas commoda] >ACO68400.1 LOW QUALITY PROTEIN: hypothetical protein MICPUN_114046 [Micromonas commoda]
Unigene22464_All	1537	ko03015//mRNA surveillance pathway;ko03013//RNA transport	Genetic Information Processing	Translation	1.23221	0	0	K10990//RecQ-mediated genome instability protein 1;K13171//serine/arginine repetitive matrix protein 1+ko03015//mRNA surveillance pathway+ko03013//RNA transport;K13171//serine/arginine repetitive matrix protein 1+ko03015//mRNA surveillance pathway+ko03013//RNA transport;K13171//serine/arginine repetitive matrix protein 1+ko03015//mRNA surveillance pathway+ko03013//RNA transport	Protein of unknown function (DUF4079)		uncharacterized protein Naga_100135g15 [Nannochloropsis gaditana]		Vegetative cell wall protein gp1 OS=Chlamydomonas reinhardtii GN=GP1 PE=1 SV=1	GO:0016021//integral component of membrane
Unigene46133_All	1460	ko03013//RNA transport;ko03015//mRNA surveillance pathway	Genetic Information Processing	Translation	1.22982	0	0	K14325//RNA-binding protein with serine-rich domain 1+ko03015//mRNA surveillance pathway+ko03013//RNA transport	Protein of unknown function (DUF2854)		conserved unknown protein [Ectocarpus siliculosus]
Unigene34627_All	2011	ko03015//mRNA surveillance pathway;ko03013//RNA transport	Genetic Information Processing	Translation	1.22478	0	0	K13171//serine/arginine repetitive matrix protein 1+ko03015//mRNA surveillance pathway+ko03013//RNA transport;K13171//serine/arginine repetitive matrix protein 1+ko03015//mRNA surveillance pathway+ko03013//RNA transport;K22020//mucin-19;K02184//formin 2	Sulfatase		Formylglycine-dependent sulfatase, C-terminal fragment Formylglycine-dependent sulfatase, N-terminal [Ectocarpus siliculosus]	[R] KOG3867 Sulfatase	Formin-like protein 18 OS=Oryza sativa subsp. japonica GN=FH18 PE=2 SV=1	GO:0008152//metabolic process;GO:0016757//transferase activity, transferring glycosyl groups;GO:0008484//sulfuric ester hydrolase activity
Unigene38180_All	485	ko03013//RNA transport;ko03015//mRNA surveillance pathway	Genetic Information Processing	Translation	1.22433	0.00011806	7.83432e-05	K16628//collagen, type VII, alpha;K13171//serine/arginine repetitive matrix protein 1+ko03015//mRNA surveillance pathway+ko03013//RNA transport	Glycerophosphoryl diester phosphodiesterase family		glcerophosphoryl diester phosphodiesterase [Ectocarpus siliculosus]
CL3147.Contig6_All	2875	ko03013//RNA transport	Genetic Information Processing	Translation	1.22025	2.57952e-36	4.36055e-37	K18213//proteinaceous RNase P [EC:3.1.26.5]+ko03013//RNA transport;K18213//proteinaceous RNase P [EC:3.1.26.5]+ko03013//RNA transport;K18213//proteinaceous RNase P [EC:3.1.26.5]+ko03013//RNA transport;K18213//proteinaceous RNase P [EC:3.1.26.5]+ko03013//RNA transport;K18213//proteinaceous RNase P [EC:3.1.26.5]+ko03013//RNA transport	Protein-only RNase P		hypothetical protein BU14_0251s0002 [Porphyra umbilicalis]	[T] KOG1187 Serine/threonine protein kinase	Proteinaceous RNase P 1, chloroplastic/mitochondrial OS=Arabidopsis thaliana GN=PRORP1 PE=1 SV=1	GO:0009055//electron transfer activity
Unigene15125_All	1305	ko03013//RNA transport	Genetic Information Processing	Translation	1.21238	0	0	K14306//nuclear pore complex protein Nup62+ko03013//RNA transport;K01414//oligopeptidase A [EC:3.4.24.70]	Protein of unknown function (DUF3727)	XM_005759578.1 Emiliania huxleyi CCMP1516 hypothetical protein partial mRNA	hypothetical protein Csa_6G108530 [Cucumis sativus]	[A] KOG1869 Splicing coactivator SRm160/300, subunit SRm300	Protein argonaute 3 OS=Arabidopsis thaliana GN=AGO3 PE=3 SV=1
Unigene4977_All	1323	ko03013//RNA transport	Genetic Information Processing	Translation	1.20906	9.04682e-39	1.45617e-39	K22020//mucin-19;K02184//formin 2;K02184//formin 2;K14306//nuclear pore complex protein Nup62+ko03013//RNA transport			hypothetical protein EMIHUDRAFT_460360, partial [Emiliania huxleyi CCMP1516] >EOD40261.1 hypothetical protein EMIHUDRAFT_460360, partial [Emiliania huxleyi CCMP1516]	[GO] KOG4157 beta-1,6-N-acetylglucosaminyltransferase, contains WSC domain	Sulfated surface glycoprotein 185 OS=Volvox carteri PE=1 SV=1
Unigene8493_All	3337	ko03013//RNA transport;ko03015//mRNA surveillance pathway	Genetic Information Processing	Translation	1.20427	0	0	K13171//serine/arginine repetitive matrix protein 1+ko03015//mRNA surveillance pathway+ko03013//RNA transport;K14325//RNA-binding protein with serine-rich domain 1+ko03015//mRNA surveillance pathway+ko03013//RNA transport;K14325//RNA-binding protein with serine-rich domain 1+ko03015//mRNA surveillance pathway+ko03013//RNA transport;K14325//RNA-binding protein with serine-rich domain 1+ko03015//mR…	Immune inhibitor A peptidase M6		hypothetical protein BU14_0131s0028, partial [Porphyra umbilicalis]	[Q] KOG1285 Beta, beta-carotene 15,15'-dioxygenase and related enzymes
Unigene6758_All	2278	ko03060//Protein export;ko03015//mRNA surveillance pathway;ko04141//Protein processing in endoplasmic reticulum;ko04145//Phagosome;ko03013//RNA transport	Genetic Information Processing;Cellular Processes	Transport and catabolism;Translation;Folding, sorting and degradation	1.19531	3.39039e-164	1.9127e-165	K02184//formin 2;K14325//RNA-binding protein with serine-rich domain 1+ko03015//mRNA surveillance pathway+ko03013//RNA transport;K10956//protein transport protein SEC61 subunit alpha+ko04145//Phagosome+ko04141//Protein processing in endoplasmic reticulum+ko03060//Protein export;K14325//RNA-binding protein with serine-rich domain 1+ko03015//mRNA surveillance pathway+ko03013//RNA transport	Common central domain of tyrosinase		ortho-aminophenol oxidase [Ectocarpus siliculosus]	[R] KOG1721 FOG: Zn-finger	Anther-specific proline-rich protein APG (Fragment) OS=Brassica napus GN=APG PE=2 SV=1	GO:0046872//metal ion binding;GO:0016491//oxidoreductase activity
Unigene40673_All	2137	ko01100//Metabolic pathways;ko01110//Biosynthesis of secondary metabolites;ko03013//RNA transport;ko03015//mRNA surveillance pathway;ko00940//Phenylpropanoid biosynthesis;ko03040//Spliceosome	Metabolism;Genetic Information Processing	Biosynthesis of other secondary metabolites;Transcription;Global and overview maps;Translation	1.18024	5.27109e-16	1.56138e-16	K14297//nuclear pore complex protein Nup98-Nup96+ko03013//RNA transport;K12875//apoptotic chromatin condensation inducer in the nucleus+ko03040//Spliceosome+ko03015//mRNA surveillance pathway+ko03013//RNA transport;K00430//peroxidase [EC:1.11.1.7]+ko01100//Metabolic pathways+ko01110//Biosynthesis of secondary metabolites+ko00940//Phenylpropanoid biosynthesis;K10990//RecQ-mediated genome instabili…	PT repeat		Cyst germination specific acidic repeat protein precursor, partial [Phytophthora megakarya]	[WV] KOG1216 von Willebrand factor and related coagulation proteins	Protein TIC 214 OS=Cucumis sativus GN=TIC214 PE=3 SV=2	GO:0016021//integral component of membrane
CL5847.Contig2_All	2497	ko01100//Metabolic pathways;ko03015//mRNA surveillance pathway;ko00480//Glutathione metabolism;ko04144//Endocytosis;ko03013//RNA transport	Genetic Information Processing;Metabolism;Cellular Processes	Metabolism of other amino acids;Transport and catabolism;Global and overview maps;Translation	1.17377	7.16983e-08	3.36713e-08	K01255//leucyl aminopeptidase [EC:3.4.11.1]+ko01100//Metabolic pathways+ko00480//Glutathione metabolism;K05747//Wiskott-Aldrich syndrome protein+ko04144//Endocytosis;K14325//RNA-binding protein with serine-rich domain 1+ko03015//mRNA surveillance pathway+ko03013//RNA transport;K02184//formin 2	Cyclin	XM_002955522.1 Volvox carteri f. nagariensis hypothetical protein, mRNA	hypothetical protein FisN_4Hh178 [Fistulifera solaris]	[R] KOG1674 Cyclin	Cyclin-U3-1 OS=Arabidopsis thaliana GN=CYCU3-1 PE=1 SV=2	GO:0008080//N-acetyltransferase activity;GO:0000079//regulation of cyclin-dependent protein serine/threonine kinase activity;GO:0019901//protein kinase binding
Unigene21856_All	2323	ko03013//RNA transport;ko03015//mRNA surveillance pathway	Genetic Information Processing	Translation	1.16323	1.53345e-39	2.43802e-40	K14325//RNA-binding protein with serine-rich domain 1+ko03015//mRNA surveillance pathway+ko03013//RNA transport;K14325//RNA-binding protein with serine-rich domain 1+ko03015//mRNA surveillance pathway+ko03013//RNA transport;K14325//RNA-binding protein with serine-rich domain 1+ko03015//mRNA surveillance pathway+ko03013//RNA transport;K02184//formin 2;K14325//RNA-binding protein with serine-rich d…	Prophage CP4-57 regulatory protein (AlpA)		hypothetical protein BU14_0095s0003 [Porphyra umbilicalis]
Unigene12876_All	4467	ko03013//RNA transport	Genetic Information Processing	Translation	1.15705	2.29575e-236	9.6548e-238	K14306//nuclear pore complex protein Nup62+ko03013//RNA transport;K14306//nuclear pore complex protein Nup62+ko03013//RNA transport;K14306//nuclear pore complex protein Nup62+ko03013//RNA transport;K14306//nuclear pore complex protein Nup62+ko03013//RNA transport	C-terminal repeat of topoisomerase		Tenascin-N [Phytophthora nicotianae]	[LR] LSE0097 Y DNA helicase
CL2905.Contig4_All	4227	ko03013//RNA transport;ko03015//mRNA surveillance pathway	Genetic Information Processing	Translation	1.1535	7.92298e-279	2.88743e-280	K13171//serine/arginine repetitive matrix protein 1+ko03015//mRNA surveillance pathway+ko03013//RNA transport;K13171//serine/arginine repetitive matrix protein 1+ko03015//mRNA surveillance pathway+ko03013//RNA transport;K13171//serine/arginine repetitive matrix protein 1+ko03015//mRNA surveillance pathway+ko03013//RNA transport;K13171//serine/arginine repetitive matrix protein 1+ko03015//mRNA sur…	Immune inhibitor A peptidase M6		predicted protein [Phaeodactylum tricornutum CCAP 1055/1] >EEC50348.1 predicted protein [Phaeodactylum tricornutum CCAP 1055/1]	[K] LSE0096 H SON DNA-binding protein/negative regulatory element-binding protein	Serine/arginine-rich splicing factor SR45 OS=Arabidopsis thaliana GN=SR45 PE=1 SV=1	GO:0008237//metallopeptidase activity
Unigene44102_All	959	ko03013//RNA transport	Genetic Information Processing	Translation	1.14991	1.67122e-06	8.86622e-07	K14297//nuclear pore complex protein Nup98-Nup96+ko03013//RNA transport	TRAF-type zinc finger		conserved unknown protein [Ectocarpus siliculosus]	[T] KOG4743 Cyclin-dependent kinase inhibitor		GO:0005643//nuclear pore
Unigene43157_All	2766	ko03013//RNA transport	Genetic Information Processing	Translation	1.1474	9.46302e-10	3.86833e-10	K14306//nuclear pore complex protein Nup62+ko03013//RNA transport;K14306//nuclear pore complex protein Nup62+ko03013//RNA transport;K14306//nuclear pore complex protein Nup62+ko03013//RNA transport	Cell cycle regulated microtubule associated protein		SAD1p [Chlamydomonas reinhardtii]	[T] KOG2085 Serine/threonine protein phosphatase 2A, regulatory subunit	Proline-rich receptor-like protein kinase PERK8 OS=Arabidopsis thaliana GN=PERK8 PE=1 SV=1	GO:0016021//integral component of membrane
CL9142.Contig2_All	2965	ko03013//RNA transport;ko03015//mRNA surveillance pathway	Genetic Information Processing	Translation	1.14037	5.73626e-82	5.38431e-83	K22020//mucin-19;K02184//formin 2;K14325//RNA-binding protein with serine-rich domain 1+ko03015//mRNA surveillance pathway+ko03013//RNA transport	Phosphoribosyl transferase domain	XM_005768709.1 Emiliania huxleyi CCMP1516 hypothetical protein mRNA	hypothetical protein THAOC_31430 [Thalassiosira oceanica]	[GO] KOG4157 beta-1,6-N-acetylglucosaminyltransferase, contains WSC domain	Formin-like protein 5 OS=Oryza sativa subsp. japonica GN=FH5 PE=2 SV=2	GO:0009143//nucleoside triphosphate catabolic process;GO:0047429//nucleoside-triphosphate diphosphatase activity;GO:0016763//transferase activity, transferring pentosyl groups;GO:0009116//nucleoside metabolic process;GO:0046110//xanthine metabolic process;GO:0043101//purine-containing compound salvage
Unigene999_All	1400	ko03015//mRNA surveillance pathway;ko03013//RNA transport	Genetic Information Processing	Translation	1.13967	1.94089e-40	3.03466e-41	K14325//RNA-binding protein with serine-rich domain 1+ko03015//mRNA surveillance pathway+ko03013//RNA transport;K14325//RNA-binding protein with serine-rich domain 1+ko03015//mRNA surveillance pathway+ko03013//RNA transport;K22020//mucin-19;K16628//collagen, type VII, alpha	Major Facilitator Superfamily		filaggrin-like, partial [Helianthus annuus]	[A] KOG4676 Splicing factor, arginine/serine-rich	Proline-rich receptor-like protein kinase PERK1 OS=Arabidopsis thaliana GN=PERK1 PE=2 SV=1
Unigene9900_All	2368	ko03015//mRNA surveillance pathway;ko03013//RNA transport	Genetic Information Processing	Translation	1.13575	2.07511e-15	6.29078e-16	K19984//exocyst complex component 5;K02184//formin 2;K14325//RNA-binding protein with serine-rich domain 1+ko03015//mRNA surveillance pathway+ko03013//RNA transport;K02184//formin 2		XM_009035760.1 Aureococcus anophagefferens hypothetical protein partial mRNA	hypothetical protein BU14_0014s0055, partial [Porphyra umbilicalis]	[ZR] LSE0118 A Protein possibly involved in cytoskeleton rearrangements, contains FH domain	Formin-like protein 14 OS=Arabidopsis thaliana GN=FH14 PE=3 SV=3
Unigene22189_All	939	ko03013//RNA transport	Genetic Information Processing	Translation	1.13552	1.03946e-07	4.94533e-08	K00784//ribonuclease Z [EC:3.1.26.11]+ko03013//RNA transport;K00784//ribonuclease Z [EC:3.1.26.11]+ko03013//RNA transport;K00784//ribonuclease Z [EC:3.1.26.11]+ko03013//RNA transport;K00784//ribonuclease Z [EC:3.1.26.11]+ko03013//RNA transport	tRNase Z endonuclease		hypothetical protein PHMEG_00017436 [Phytophthora megakarya]	[R] KOG2121 Predicted metal-dependent hydrolase (beta-lactamase superfamily)	tRNase Z TRZ3, mitochondrial OS=Arabidopsis thaliana GN=TRZ3 PE=1 SV=1
CL6103.Contig3_All	1610	ko03013//RNA transport	Genetic Information Processing	Translation	1.13127	2.33827e-08	1.05719e-08	K14306//nuclear pore complex protein Nup62+ko03013//RNA transport;K14306//nuclear pore complex protein Nup62+ko03013//RNA transport;K14306//nuclear pore complex protein Nup62+ko03013//RNA transport;K14306//nuclear pore complex protein Nup62+ko03013//RNA transport;K22020//mucin-19	Translation initiation factor eIF3 subunit	XM_009592962.2 PREDICTED: Nicotiana tomentosiformis heat stress transcription factor A-6b-like (LOC104088306), partial mRNA	hypothetical protein PPTG_02088 [Phytophthora parasitica INRA-310] >ETI50564.1 hypothetical protein F443_05918 [Phytophthora parasitica P1569] >ETK90437.1 hypothetical protein L915_05800 [Phytophthora parasitica] >ETL43850.1 hypothetical protein L916_05735 [Phytophthora parasitica] >ETL97020.1 hypothetical protein L917_05621 [Phytophthora parasitica] >ETM50169.1 hypothetical protein L914_05746 [P…		Nuclear pore complex protein NUP62 OS=Arabidopsis thaliana GN=NUP62 PE=1 SV=1	GO:0016282//eukaryotic 43S preinitiation complex;GO:0006446//regulation of translational initiation;GO:0003743//translation initiation factor activity;GO:0033290//eukaryotic 48S preinitiation complex;GO:0005852//eukaryotic translation initiation factor 3 complex;GO:0001731//formation of translation preinitiation complex
CL6179.Contig1_All	3218	ko03013//RNA transport	Genetic Information Processing	Translation	1.13014	1.42683e-281	5.15684e-283	K02184//formin 2;K22020//mucin-19;K02184//formin 2;K14306//nuclear pore complex protein Nup62+ko03013//RNA transport	Haemolysin XhlA		hypothetical protein THRCLA_06176 [Thraustotheca clavata]	[Z] KOG4462 WASP-interacting protein VRP1/WIP, contains WH2 domain
CL1877.Contig2_All	2429	ko03013//RNA transport;ko03015//mRNA surveillance pathway	Genetic Information Processing	Translation	1.1234	1.11613e-31	2.08856e-32	K14325//RNA-binding protein with serine-rich domain 1+ko03015//mRNA surveillance pathway+ko03013//RNA transport	Autophagy protein 16 (ATG16)			[W] KOG3544 Collagens (type IV and type XIII), and related proteins	Anther-specific proline-rich protein APG OS=Arabidopsis thaliana GN=APG PE=2 SV=2
CL7402.Contig3_All	1603	ko03015//mRNA surveillance pathway;ko03013//RNA transport	Genetic Information Processing	Translation	1.12034	6.33131e-33	1.15164e-33	K14325//RNA-binding protein with serine-rich domain 1+ko03015//mRNA surveillance pathway+ko03013//RNA transport;K14325//RNA-binding protein with serine-rich domain 1+ko03015//mRNA surveillance pathway+ko03013//RNA transport	Sulfotransferase family		JmjC domain protein [Nannochloropsis gaditana]
Unigene22669_All	1403	ko03015//mRNA surveillance pathway;ko03013//RNA transport	Genetic Information Processing	Translation	1.11385	2.705e-181	1.40689e-182	K16628//collagen, type VII, alpha;K14325//RNA-binding protein with serine-rich domain 1+ko03015//mRNA surveillance pathway+ko03013//RNA transport;K22020//mucin-19	Protein of unknown function (DUF3493)		conserved unknown protein [Ectocarpus siliculosus]			GO:0016021//integral component of membrane
Unigene44769_All	7728	ko03013//RNA transport;ko03015//mRNA surveillance pathway	Genetic Information Processing	Translation	1.09637	0	0	K22020//mucin-19;K02184//formin 2;K13171//serine/arginine repetitive matrix protein 1+ko03015//mRNA surveillance pathway+ko03013//RNA transport;K13171//serine/arginine repetitive matrix protein 1+ko03015//mRNA surveillance pathway+ko03013//RNA transport	Right handed beta helix region		hypothetical protein SDRG_13515 [Saprolegnia diclina VS20] >EQC28835.1 hypothetical protein SDRG_13515 [Saprolegnia diclina VS20]	[AR] KOG2146 Splicing coactivator SRm160/300, subunit SRm160 (contains PWI domain)	CASP-like protein 4A2 OS=Oryza sativa subsp. japonica GN=Os02g0134500 PE=2 SV=2	GO:0016021//integral component of membrane
CL2720.Contig4_All	2072	ko03013//RNA transport;ko03015//mRNA surveillance pathway	Genetic Information Processing	Translation	1.09474	1.57455e-104	1.24709e-105	K13171//serine/arginine repetitive matrix protein 1+ko03015//mRNA surveillance pathway+ko03013//RNA transport;K13171//serine/arginine repetitive matrix protein 1+ko03015//mRNA surveillance pathway+ko03013//RNA transport;K14325//RNA-binding protein with serine-rich domain 1+ko03015//mRNA surveillance pathway+ko03013//RNA transport;K13171//serine/arginine repetitive matrix protein 1+ko03015//mRNA s…	Common central domain of tyrosinase		putative scytonemin-related tyrosinase [Ectocarpus siliculosus]	[A] KOG1869 Splicing coactivator SRm160/300, subunit SRm300		GO:0046872//metal ion binding;GO:0016491//oxidoreductase activity
Unigene42230_All	1247	ko03013//RNA transport;ko03015//mRNA surveillance pathway	Genetic Information Processing	Translation	1.09372	7.79362e-110	5.92039e-111	K14325//RNA-binding protein with serine-rich domain 1+ko03015//mRNA surveillance pathway+ko03013//RNA transport			predicted protein [Phaeodactylum tricornutum CCAP 1055/1] >ACI65100.1 predicted protein [Phaeodactylum tricornutum CCAP 1055/1]	[A] KOG1869 Splicing coactivator SRm160/300, subunit SRm300
Unigene14122_All	2368	ko01110//Biosynthesis of secondary metabolites;ko01100//Metabolic pathways;ko03013//RNA transport;ko00940//Phenylpropanoid biosynthesis;ko03015//mRNA surveillance pathway	Genetic Information Processing;Metabolism	Biosynthesis of other secondary metabolites;Translation;Global and overview maps	1.08945	5.13782e-61	6.0068e-62	K13171//serine/arginine repetitive matrix protein 1+ko03015//mRNA surveillance pathway+ko03013//RNA transport;K00430//peroxidase [EC:1.11.1.7]+ko01100//Metabolic pathways+ko01110//Biosynthesis of secondary metabolites+ko00940//Phenylpropanoid biosynthesis;K00430//peroxidase [EC:1.11.1.7]+ko01100//Metabolic pathways+ko01110//Biosynthesis of secondary metabolites+ko00940//Phenylpropanoid biosynthes…	Vitamin K epoxide reductase family		possible vitamin K epoxide reductase, plastid protein [Ectocarpus siliculosus]	[T] KOG1187 Serine/threonine protein kinase	Oleosin-B6 OS=Brassica napus GN=OlnB6 PE=1 SV=3	GO:0016021//integral component of membrane
CL1622.Contig1_All	1682	ko03013//RNA transport	Genetic Information Processing	Translation	1.08401	0	0	K14306//nuclear pore complex protein Nup62+ko03013//RNA transport;K14306//nuclear pore complex protein Nup62+ko03013//RNA transport	RNA synthesis protein NSP10		hypothetical protein THRCLA_06712, partial [Thraustotheca clavata]	[WV] KOG1216 von Willebrand factor and related coagulation proteins		GO:0016021//integral component of membrane
Unigene6242_All	1977	ko03013//RNA transport;ko03015//mRNA surveillance pathway	Genetic Information Processing	Translation	1.08312	0	0	K22020//mucin-19;K09566//peptidyl-prolyl isomerase G (cyclophilin G) [EC:5.2.1.8];K13171//serine/arginine repetitive matrix protein 1+ko03015//mRNA surveillance pathway+ko03013//RNA transport;K14325//RNA-binding protein with serine-rich domain 1+ko03015//mRNA surveillance pathway+ko03013//RNA transport;K14325//RNA-binding protein with serine-rich domain 1+ko03015//mRNA surveillance pathway+ko0301…	Protein of unknown function (DUF2408)		hypothetical protein BU14_0222s0009 [Porphyra umbilicalis]	[PT] KOG0498 K+-channel ERG and related proteins, contain PAS/PAC sensor domain
CL3700.Contig3_All	2567	ko03013//RNA transport;ko03015//mRNA surveillance pathway	Genetic Information Processing	Translation	1.08074	3.3604e-33	6.07461e-34	K13171//serine/arginine repetitive matrix protein 1+ko03015//mRNA surveillance pathway+ko03013//RNA transport;K04733//interleukin-1 receptor-associated kinase 4 [EC:2.7.11.1];K13171//serine/arginine repetitive matrix protein 1+ko03015//mRNA surveillance pathway+ko03013//RNA transport;K14325//RNA-binding protein with serine-rich domain 1+ko03015//mRNA surveillance pathway+ko03013//RNA transport;K1…			hypothetical protein AURANDRAFT_64088 [Aureococcus anophagefferens] >EGB08443.1 hypothetical protein AURANDRAFT_64088 [Aureococcus anophagefferens]	[W] KOG3544 Collagens (type IV and type XIII), and related proteins	Formin-like protein 18 OS=Oryza sativa subsp. japonica GN=FH18 PE=2 SV=1	GO:0046872//metal ion binding;GO:0016787//hydrolase activity;GO:0016491//oxidoreductase activity
Unigene41247_All	1896	ko03013//RNA transport;ko03015//mRNA surveillance pathway	Genetic Information Processing	Translation	1.07993	3.07704e-79	2.95571e-80	K02184//formin 2;K14325//RNA-binding protein with serine-rich domain 1+ko03015//mRNA surveillance pathway+ko03013//RNA transport;K02184//formin 2;K14325//RNA-binding protein with serine-rich domain 1+ko03015//mRNA surveillance pathway+ko03013//RNA transport;K02184//formin 2	Kelch motif		conserved unknown protein [Ectocarpus siliculosus]	[A] KOG1869 Splicing coactivator SRm160/300, subunit SRm300
Unigene11356_All	4534	ko03013//RNA transport	Genetic Information Processing	Translation	1.07272	7.81799e-135	5.15585e-136	K14306//nuclear pore complex protein Nup62+ko03013//RNA transport;K14306//nuclear pore complex protein Nup62+ko03013//RNA transport;K01404//leishmanolysin [EC:3.4.24.36];K01404//leishmanolysin [EC:3.4.24.36]	Chaperone of endosialidase		conserved unknown protein [Ectocarpus siliculosus]	[TW] KOG1225 Teneurin-1 and related extracellular matrix proteins, contain EGF-like repeats
CL4089.Contig1_All	2124	ko03015//mRNA surveillance pathway;ko03013//RNA transport	Genetic Information Processing	Translation	1.07262	9.63952e-167	5.3548e-168	K02184//formin 2;K02184//formin 2;K14325//RNA-binding protein with serine-rich domain 1+ko03015//mRNA surveillance pathway+ko03013//RNA transport	Legume lectin domain	XM_015779384.1 PREDICTED: Oryza sativa Japonica Group omega-hydroxypalmitate O-feruloyl transferase (LOC9266238), transcript variant X2, mRNA	hypothetical protein AURANDRAFT_65479 [Aureococcus anophagefferens] >EGB06651.1 hypothetical protein AURANDRAFT_65479 [Aureococcus anophagefferens]	[M] LSE0601 A Pollen extensin-like protein (Pex)	Formin-like protein 5 OS=Oryza sativa subsp. japonica GN=FH5 PE=2 SV=2	GO:0016021//integral component of membrane;GO:0035091//phosphatidylinositol binding
Unigene5117_All	1491	ko03013//RNA transport	Genetic Information Processing	Translation	1.0724	1.67337e-107	1.29641e-108	K03243//translation initiation factor 5B+ko03013//RNA transport;K03243//translation initiation factor 5B+ko03013//RNA transport;K20283//golgin subfamily A member 4;K03243//translation initiation factor 5B+ko03013//RNA transport;K03243//translation initiation factor 5B+ko03013//RNA transport	Sec23/Sec24 helical domain		predicted protein [Thalassiosira pseudonana CCMP1335] >EED88483.1 predicted protein [Thalassiosira pseudonana CCMP1335]		WEB family protein At4g27595, chloroplastic OS=Arabidopsis thaliana GN=At4g27595 PE=2 SV=1	GO:0018026//peptidyl-lysine monomethylation;GO:0016279//protein-lysine N-methyltransferase activity
Unigene40669_All	2418	ko03013//RNA transport;ko01100//Metabolic pathways;ko03040//Spliceosome;ko00940//Phenylpropanoid biosynthesis;ko03015//mRNA surveillance pathway;ko01110//Biosynthesis of secondary metabolites	Metabolism;Genetic Information Processing	Global and overview maps;Translation;Transcription;Biosynthesis of other secondary metabolites	1.06045	6.00723e-49	8.19522e-50	K10990//RecQ-mediated genome instability protein 1;K10990//RecQ-mediated genome instability protein 1;K12875//apoptotic chromatin condensation inducer in the nucleus+ko03040//Spliceosome+ko03015//mRNA surveillance pathway+ko03013//RNA transport;K00430//peroxidase [EC:1.11.1.7]+ko01100//Metabolic pathways+ko01110//Biosynthesis of secondary metabolites+ko00940//Phenylpropanoid biosynthesis	PT repeat		Mucin-1 [Symbiodinium microadriaticum]	[LR] LSE0097 Y DNA helicase	Classical arabinogalactan protein 10 OS=Arabidopsis thaliana GN=AGP10 PE=1 SV=1	GO:0016539//intein-mediated protein splicing;GO:0008233//peptidase activity;GO:0016021//integral component of membrane
CL2720.Contig1_All	2310	ko03013//RNA transport;ko03015//mRNA surveillance pathway	Genetic Information Processing	Translation	1.05098	5.66585e-144	3.57131e-145	K13171//serine/arginine repetitive matrix protein 1+ko03015//mRNA surveillance pathway+ko03013//RNA transport;K13171//serine/arginine repetitive matrix protein 1+ko03015//mRNA surveillance pathway+ko03013//RNA transport;K14325//RNA-binding protein with serine-rich domain 1+ko03015//mRNA surveillance pathway+ko03013//RNA transport;K13171//serine/arginine repetitive matrix protein 1+ko03015//mRNA s…	Common central domain of tyrosinase		putative scytonemin-related tyrosinase [Ectocarpus siliculosus]	[A] KOG1869 Splicing coactivator SRm160/300, subunit SRm300		GO:0046872//metal ion binding;GO:0016491//oxidoreductase activity
Unigene58_All	10066	ko03015//mRNA surveillance pathway;ko03013//RNA transport	Genetic Information Processing	Translation	1.05018	0	0	K22020//mucin-19;K13172//serine/arginine repetitive matrix protein 2;K13171//serine/arginine repetitive matrix protein 1+ko03015//mRNA surveillance pathway+ko03013//RNA transport;K13171//serine/arginine repetitive matrix protein 1+ko03015//mRNA surveillance pathway+ko03013//RNA transport	FG-GAP repeat		predicted protein [Thalassiosira pseudonana CCMP1335] >EED87619.1 predicted protein [Thalassiosira pseudonana CCMP1335]	[K] LSE0096 H SON DNA-binding protein/negative regulatory element-binding protein	Serine/arginine-rich splicing factor SR45 OS=Arabidopsis thaliana GN=SR45 PE=1 SV=1	GO:0007154//cell communication;GO:0016021//integral component of membrane
CL3794.Contig1_All	2142	ko03013//RNA transport;ko03015//mRNA surveillance pathway	Genetic Information Processing	Translation	1.04676	2.65387e-154	1.57885e-155	K22020//mucin-19;K16628//collagen, type VII, alpha;K19719//collagen, type II, alpha;K16628//collagen, type VII, alpha;K13171//serine/arginine repetitive matrix protein 1+ko03015//mRNA surveillance pathway+ko03013//RNA transport	ABC-2 family transporter protein		hypothetical protein AURANDRAFT_70670, partial [Aureococcus anophagefferens] >EGB11868.1 hypothetical protein AURANDRAFT_70670, partial [Aureococcus anophagefferens]	[T] KOG1187 Serine/threonine protein kinase	Proline-rich receptor-like protein kinase PERK9 OS=Arabidopsis thaliana GN=PERK9 PE=1 SV=1
CL5395.Contig2_All	2013	ko03013//RNA transport	Genetic Information Processing	Translation	1.04065	2.45352e-28	4.93166e-29	K03257//translation initiation factor 4A+ko03013//RNA transport;K03257//translation initiation factor 4A+ko03013//RNA transport;K14778//ATP-dependent RNA helicase DDX49/DBP8 [EC:3.6.4.13];K14778//ATP-dependent RNA helicase DDX49/DBP8 [EC:3.6.4.13]	DEAD/DEAH box helicase		ATP dependant RNA helicase [Chondrus crispus] >CDF38757.1 ATP dependant RNA helicase [Chondrus crispus]	[J] KOG0327 Translation initiation factor 4F, helicase subunit (eIF-4A) and related helicases	DEAD-box ATP-dependent RNA helicase 47, mitochondrial OS=Arabidopsis thaliana GN=RH47 PE=1 SV=2	GO:0005524//ATP binding;GO:0004386//helicase activity;GO:0003676//nucleic acid binding
CL9728.Contig1_All	1729	ko03015//mRNA surveillance pathway;ko03013//RNA transport	Genetic Information Processing	Translation	1.0387	3.43719e-100	2.81083e-101	K22020//mucin-19;K13171//serine/arginine repetitive matrix protein 1+ko03015//mRNA surveillance pathway+ko03013//RNA transport;K13171//serine/arginine repetitive matrix protein 1+ko03015//mRNA surveillance pathway+ko03013//RNA transport;K13171//serine/arginine repetitive matrix protein 1+ko03015//mRNA surveillance pathway+ko03013//RNA transport	Mitochondrial-associated sphingomyelin phosphodiesterase	XM_009041081.1 Aureococcus anophagefferens hypothetical protein partial mRNA	predicted protein [Thalassiosira pseudonana CCMP1335] >ACI64122.1 predicted protein [Thalassiosira pseudonana CCMP1335]	[T] LSE0513 C 7-transmembrane receptor	Formin-like protein 3 OS=Oryza sativa subsp. japonica GN=FH3 PE=2 SV=2	GO:0055085//transmembrane transport;GO:0004553//hydrolase activity, hydrolyzing O-glycosyl compounds;GO:0016021//integral component of membrane;GO:0042597//periplasmic space
CL2776.Contig2_All	1174	ko03013//RNA transport;ko03015//mRNA surveillance pathway	Genetic Information Processing	Translation	1.03288	0	0	K14325//RNA-binding protein with serine-rich domain 1+ko03015//mRNA surveillance pathway+ko03013//RNA transport;K13171//serine/arginine repetitive matrix protein 1+ko03015//mRNA surveillance pathway+ko03013//RNA transport;K14325//RNA-binding protein with serine-rich domain 1+ko03015//mRNA surveillance pathway+ko03013//RNA transport;K14325//RNA-binding protein with serine-rich domain 1+ko03015//mR…	Eukaryotic porin		hypothetical protein AURANDRAFT_70520 [Aureococcus anophagefferens] >EGB12618.1 hypothetical protein AURANDRAFT_70520 [Aureococcus anophagefferens]	[T] KOG1187 Serine/threonine protein kinase	Formin-like protein 5 OS=Oryza sativa subsp. japonica GN=FH5 PE=2 SV=2	GO:0005509//calcium ion binding
CL5847.Contig3_All	2604	ko03013//RNA transport;ko04144//Endocytosis;ko03015//mRNA surveillance pathway	Cellular Processes;Genetic Information Processing	Transport and catabolism;Translation	1.0285	6.92688e-11	2.64032e-11	K05747//Wiskott-Aldrich syndrome protein+ko04144//Endocytosis;K14325//RNA-binding protein with serine-rich domain 1+ko03015//mRNA surveillance pathway+ko03013//RNA transport;K02184//formin 2;K02184//formin 2	Cyclin		hypothetical protein FisN_4Lh178 [Fistulifera solaris]	[R] KOG1674 Cyclin	Cyclin-U4-1 OS=Arabidopsis thaliana GN=CYCU4-1 PE=1 SV=1	GO:0008080//N-acetyltransferase activity;GO:0000079//regulation of cyclin-dependent protein serine/threonine kinase activity;GO:0019901//protein kinase binding
Unigene152_All	1481	ko03015//mRNA surveillance pathway;ko03013//RNA transport	Genetic Information Processing	Translation	1.02396	1.99863e-17	5.57617e-18	K22020//mucin-19;K14325//RNA-binding protein with serine-rich domain 1+ko03015//mRNA surveillance pathway+ko03013//RNA transport;K13171//serine/arginine repetitive matrix protein 1+ko03015//mRNA surveillance pathway+ko03013//RNA transport			hypothetical protein AURANDRAFT_70670, partial [Aureococcus anophagefferens] >EGB11868.1 hypothetical protein AURANDRAFT_70670, partial [Aureococcus anophagefferens]	[W] KOG3544 Collagens (type IV and type XIII), and related proteins	Vegetative cell wall protein gp1 OS=Chlamydomonas reinhardtii GN=GP1 PE=1 SV=1
Unigene40670_All	2530	ko00040//Pentose and glucuronate interconversions;ko03015//mRNA surveillance pathway;ko03040//Spliceosome;ko01100//Metabolic pathways;ko03013//RNA transport;ko00940//Phenylpropanoid biosynthesis;ko01110//Biosynthesis of secondary metabolites	Metabolism;Genetic Information Processing	Biosynthesis of other secondary metabolites;Global and overview maps;Carbohydrate metabolism;Transcription;Translation	1.02094	7.49391e-27	1.56237e-27	K10990//RecQ-mediated genome instability protein 1;K00430//peroxidase [EC:1.11.1.7]+ko01100//Metabolic pathways+ko01110//Biosynthesis of secondary metabolites+ko00940//Phenylpropanoid biosynthesis;K12875//apoptotic chromatin condensation inducer in the nucleus+ko03040//Spliceosome+ko03015//mRNA surveillance pathway+ko03013//RNA transport;K01051//pectinesterase [EC:3.1.1.11]+ko00040//Pentose and g…	PT repeat		similar to hedgehog protein [Cyanidioschyzon merolae strain 10D] >BAM79537.1 similar to hedgehog protein [Cyanidioschyzon merolae strain 10D]	[S] LSE0042 A Uncharacterized plastocyanin-like protein, probably non-copper-binding	Myrosinase-binding protein 2 OS=Arabidopsis thaliana GN=MBP2 PE=2 SV=1	GO:0016539//intein-mediated protein splicing;GO:0008233//peptidase activity;GO:0016021//integral component of membrane
CL3427.Contig6_All	1922	ko01230//Biosynthesis of amino acids;ko00562//Inositol phosphate metabolism;ko04070//Phosphatidylinositol signaling system;ko00770//Pantothenate and CoA biosynthesis;ko01110//Biosynthesis of secondary metabolites;ko00290//Valine, leucine and isoleucine biosynthesis;ko03013//RNA transport;ko01100//Metabolic pathways;ko01210//2-Oxocarboxylic acid metabolism	Environmental Information Processing;Metabolism;Genetic Information Processing	Signal transduction;Translation;Metabolism of cofactors and vitamins;Carbohydrate metabolism;Global and overview maps;Amino acid metabolism	1.01907	2.43449e-161	1.39252e-162	K05857//phosphatidylinositol phospholipase C, delta [EC:3.1.4.11]+ko01100//Metabolic pathways+ko04933//AGE-RAGE signaling pathway in diabetic complications+ko04070//Phosphatidylinositol signaling system+ko00562//Inositol phosphate metabolism;K10406//kinesin family member C2/C3;K00053//ketol-acid reductoisomerase [EC:1.1.1.86]+ko00290//Valine, leucine and isoleucine biosynthesis+ko00770//Pantothen…	NUMOD3 motif (2 copies)		conserved unknown protein [Ectocarpus siliculosus]			GO:0003677//DNA binding
CL966.Contig3_All	2958	ko03020//RNA polymerase;ko03040//Spliceosome;ko00040//Pentose and glucuronate interconversions;ko01100//Metabolic pathways;ko03015//mRNA surveillance pathway;ko03013//RNA transport	Metabolism;Genetic Information Processing	Global and overview maps;Translation;Carbohydrate metabolism;Transcription	1.01367	3.94299e-25	8.57108e-26	K01051//pectinesterase [EC:3.1.1.11]+ko00040//Pentose and glucuronate interconversions+ko01100//Metabolic pathways;K03006//DNA-directed RNA polymerase II subunit RPB1 [EC:2.7.7.6]+ko03020//RNA polymerase;K10990//RecQ-mediated genome instability protein 1;K12875//apoptotic chromatin condensation inducer in the nucleus+ko03040//Spliceosome+ko03015//mRNA surveillance pathway+ko03013//RNA transport;K…	Sulfatase		hypothetical protein H310_03146 [Aphanomyces invadans] >ETW07074.1 hypothetical protein H310_03146 [Aphanomyces invadans]	[WV] KOG1216 von Willebrand factor and related coagulation proteins	Protein TIC 214 OS=Cucumis sativus GN=TIC214 PE=3 SV=2	GO:0016539//intein-mediated protein splicing;GO:0008233//peptidase activity;GO:0016021//integral component of membrane
CL7000.Contig1_All	3588	ko03013//RNA transport	Genetic Information Processing	Translation	1.00919	1.96556e-201	9.35725e-203	K14306//nuclear pore complex protein Nup62+ko03013//RNA transport;K14306//nuclear pore complex protein Nup62+ko03013//RNA transport	PT repeat		putative lipase, partial [Nannochloropsis gaditana]	[T] LSE0513 C 7-transmembrane receptor	Protein TIC 214 OS=Cucumis sativus GN=TIC214 PE=3 SV=2
Unigene19657_All	1432	ko03013//RNA transport	Genetic Information Processing	Translation	1.00395	9.61283e-187	4.86629e-188	K03259//translation initiation factor 4E+ko03013//RNA transport;K03259//translation initiation factor 4E+ko03013//RNA transport;K03259//translation initiation factor 4E+ko03013//RNA transport;K03259//translation initiation factor 4E+ko03013//RNA transport	Eukaryotic initiation factor 4E		eukaryotic initiation factor 4E [Achlya hypogyna]	[J] KOG1670 Translation initiation factor 4F, cap-binding subunit (eIF-4E) and related cap-binding proteins	Eukaryotic translation initiation factor 4E-1 OS=Zea mays PE=2 SV=1	GO:0003743//translation initiation factor activity;GO:0005737//cytoplasm
Unigene18909_All	745	ko03015//mRNA surveillance pathway;ko03013//RNA transport	Genetic Information Processing	Translation	-1.00338	3.71082e-08	1.70075e-08	K14325//RNA-binding protein with serine-rich domain 1+ko03015//mRNA surveillance pathway+ko03013//RNA transport;K14325//RNA-binding protein with serine-rich domain 1+ko03015//mRNA surveillance pathway+ko03013//RNA transport;K14325//RNA-binding protein with serine-rich domain 1+ko03015//mRNA surveillance pathway+ko03013//RNA transport;K22020//mucin-19;K14325//RNA-binding protein with serine-rich d…			hypothetical protein BU14_0104s0020 [Porphyra umbilicalis]
Unigene19078_All	545	ko03013//RNA transport;ko01100//Metabolic pathways;ko00040//Pentose and glucuronate interconversions	Genetic Information Processing;Metabolism	Translation;Carbohydrate metabolism;Global and overview maps	-1.00666	5.06694e-09	2.18064e-09	K14297//nuclear pore complex protein Nup98-Nup96+ko03013//RNA transport;K02184//formin 2;K01051//pectinesterase [EC:3.1.1.11]+ko00040//Pentose and glucuronate interconversions+ko01100//Metabolic pathways			hypothetical protein AURANDRAFT_71291, partial [Aureococcus anophagefferens] >EGB09872.1 hypothetical protein AURANDRAFT_71291, partial [Aureococcus anophagefferens]	[W] KOG3544 Collagens (type IV and type XIII), and related proteins		GO:0046872//metal ion binding
CL4235.Contig3_All	1726	ko03013//RNA transport	Genetic Information Processing	Translation	-1.00767	6.0836e-26	1.29722e-26	K14439//SWI/SNF-related matrix-associated actin-dependent regulator of chromatin subfamily A containing DEAD/H box 1 [EC:3.6.4.12];K14306//nuclear pore complex protein Nup62+ko03013//RNA transport;K14306//nuclear pore complex protein Nup62+ko03013//RNA transport;K14306//nuclear pore complex protein Nup62+ko03013//RNA transport	Pentapeptide repeats (9 copies)		hypothetical protein EMIHUDRAFT_97878 [Emiliania huxleyi CCMP1516] >EOD39717.1 hypothetical protein EMIHUDRAFT_97878 [Emiliania huxleyi CCMP1516]	[Z] KOG0516 Dystonin, GAS (Growth-arrest-specific protein), and related proteins	Dynein assembly factor 3, axonemal homolog OS=Chlamydomonas reinhardtii GN=DAB1 PE=3 SV=1	GO:0016021//integral component of membrane;GO:0035091//phosphatidylinositol binding
CL5920.Contig1_All	1225	ko03013//RNA transport;ko03015//mRNA surveillance pathway	Genetic Information Processing	Translation	-1.00787	6.23684e-05	3.96898e-05	K13171//serine/arginine repetitive matrix protein 1+ko03015//mRNA surveillance pathway+ko03013//RNA transport;K17987//next to BRCA1 gene 1 protein;K13171//serine/arginine repetitive matrix protein 1+ko03015//mRNA surveillance pathway+ko03013//RNA transport	dDENN domain	CP012610.1 Oryza sativa Indica Group cultivar RP Bio-226 chromosome 2 sequence	hypothetical protein BU14_0546s0009 [Porphyra umbilicalis]	[A] KOG1869 Splicing coactivator SRm160/300, subunit SRm300
CL4892.Contig1_All	1390	ko03040//Spliceosome;ko03013//RNA transport	Genetic Information Processing	Transcription;Translation	-1.00816	5.63404e-09	2.43297e-09	K12878//THO complex subunit 1+ko03040//Spliceosome+ko03013//RNA transport;K12878//THO complex subunit 1+ko03040//Spliceosome+ko03013//RNA transport;K12878//THO complex subunit 1+ko03040//Spliceosome+ko03013//RNA transport	THO complex subunit 1 transcription elongation factor		hypothetical protein F443_18010 [Phytophthora parasitica P1569]	[Y] KOG2491 Nuclear matrix protein	THO complex subunit 1 OS=Arabidopsis thaliana GN=THO1 PE=1 SV=1
Unigene33968_All	731	ko03015//mRNA surveillance pathway;ko03013//RNA transport	Genetic Information Processing	Translation	-1.00953	5.78218e-10	2.33389e-10	K13171//serine/arginine repetitive matrix protein 1+ko03015//mRNA surveillance pathway+ko03013//RNA transport;K14325//RNA-binding protein with serine-rich domain 1+ko03015//mRNA surveillance pathway+ko03013//RNA transport;K14325//RNA-binding protein with serine-rich domain 1+ko03015//mRNA surveillance pathway+ko03013//RNA transport;K14325//RNA-binding protein with serine-rich domain 1+ko03015//mR…	Adenylate and Guanylate cyclase catalytic domain		guanylyl cyclase [Ectocarpus siliculosus]	[T] LSE2823 H Adenylate cyclase		GO:0016849//phosphorus-oxygen lyase activity;GO:0009190//cyclic nucleotide biosynthetic process;GO:0005622//intracellular;GO:0035556//intracellular signal transduction
CL8458.Contig2_All	1578	ko00940//Phenylpropanoid biosynthesis;ko03015//mRNA surveillance pathway;ko01110//Biosynthesis of secondary metabolites;ko01100//Metabolic pathways;ko03013//RNA transport	Metabolism;Genetic Information Processing	Global and overview maps;Translation;Biosynthesis of other secondary metabolites	-1.01082	5.10372e-208	2.36604e-209	K14325//RNA-binding protein with serine-rich domain 1+ko03015//mRNA surveillance pathway+ko03013//RNA transport;K14325//RNA-binding protein with serine-rich domain 1+ko03015//mRNA surveillance pathway+ko03013//RNA transport;K00430//peroxidase [EC:1.11.1.7]+ko01100//Metabolic pathways+ko01110//Biosynthesis of secondary metabolites+ko00940//Phenylpropanoid biosynthesis;K14325//RNA-binding protein w…	ATP-grasp domain		conserved unknown protein [Ectocarpus siliculosus]	[R] KOG0825 PHD Zn-finger protein	Vegetative cell wall protein gp1 OS=Chlamydomonas reinhardtii GN=GP1 PE=1 SV=1	GO:0046872//metal ion binding;GO:0005524//ATP binding;GO:0003824//catalytic activity
CL4269.Contig2_All	1136	ko03013//RNA transport;ko03015//mRNA surveillance pathway	Genetic Information Processing	Translation	-1.01251	2.82349e-31	5.32209e-32	K02184//formin 2;K02184//formin 2;K22020//mucin-19;K14325//RNA-binding protein with serine-rich domain 1+ko03015//mRNA surveillance pathway+ko03013//RNA transport;K14325//RNA-binding protein with serine-rich domain 1+ko03015//mRNA surveillance pathway+ko03013//RNA transport	NAD(P)H-binding		predicted protein [Thalassiosira pseudonana CCMP1335] >EED87894.1 predicted protein [Thalassiosira pseudonana CCMP1335]	[S] KOG2567 Uncharacterized conserved protein	Sulfated surface glycoprotein 185 OS=Volvox carteri PE=1 SV=1	GO:0005622//intracellular
Unigene26010_All	1061	ko03013//RNA transport;ko03015//mRNA surveillance pathway	Genetic Information Processing	Translation	-1.01579	0.000321291	0.000228087	K22020//mucin-19;K13171//serine/arginine repetitive matrix protein 1+ko03015//mRNA surveillance pathway+ko03013//RNA transport;K14325//RNA-binding protein with serine-rich domain 1+ko03015//mRNA surveillance pathway+ko03013//RNA transport;K14325//RNA-binding protein with serine-rich domain 1+ko03015//mRNA surveillance pathway+ko03013//RNA transport;K14325//RNA-binding protein with serine-rich dom…	Calcineurin-like phosphoesterase		hypothetical protein BU14_0032s0008 [Porphyra umbilicalis]	[AR] KOG2146 Splicing coactivator SRm160/300, subunit SRm160 (contains PWI domain)
Unigene14950_All	5019	ko03015//mRNA surveillance pathway;ko03013//RNA transport	Genetic Information Processing	Translation	-1.0167	0	0	K14325//RNA-binding protein with serine-rich domain 1+ko03015//mRNA surveillance pathway+ko03013//RNA transport;K14325//RNA-binding protein with serine-rich domain 1+ko03015//mRNA surveillance pathway+ko03013//RNA transport;K14325//RNA-binding protein with serine-rich domain 1+ko03015//mRNA surveillance pathway+ko03013//RNA transport;K14325//RNA-binding protein with serine-rich domain 1+ko03015//…	Hint-domain	XM_005759800.1 Emiliania huxleyi CCMP1516 hypothetical protein mRNA	Inter-alpha-trypsin inhibitor heavy chain H5 [Symbiodinium microadriaticum]	[T] TWOG0129 Protein kinase, contains U-box domains	U-box domain-containing protein 52 OS=Arabidopsis thaliana GN=PUB52 PE=2 SV=1
Unigene30267_All	693	ko03013//RNA transport;ko03015//mRNA surveillance pathway	Genetic Information Processing	Translation	-1.01897	7.58999e-05	4.88596e-05	K14325//RNA-binding protein with serine-rich domain 1+ko03015//mRNA surveillance pathway+ko03013//RNA transport;K14325//RNA-binding protein with serine-rich domain 1+ko03015//mRNA surveillance pathway+ko03013//RNA transport;K14325//RNA-binding protein with serine-rich domain 1+ko03015//mRNA surveillance pathway+ko03013//RNA transport;K19719//collagen, type II, alpha	PWWP domain		serine/arginine-rich splicing factor SR45 isoform X1 [Aegilops tauschii subsp. tauschii]	[W] KOG3544 Collagens (type IV and type XIII), and related proteins	Formin-like protein 3 OS=Oryza sativa subsp. japonica GN=FH3 PE=2 SV=2
CL10189.Contig1_All	2908	ko03013//RNA transport	Genetic Information Processing	Translation	-1.02058	2.08915e-19	5.40433e-20	K14306//nuclear pore complex protein Nup62+ko03013//RNA transport;K03243//translation initiation factor 5B+ko03013//RNA transport;K14306//nuclear pore complex protein Nup62+ko03013//RNA transport	Pentapeptide repeats (9 copies)		uncharacterized protein [Blastocystis hominis] >CBK23973.2 unnamed protein product [Blastocystis hominis]	[TV] KOG4297 C-type lectin	Auxilin-related protein 1 OS=Arabidopsis thaliana GN=AUXI1 PE=1 SV=2	GO:0016021//integral component of membrane;GO:0035091//phosphatidylinositol binding
CL3251.Contig6_All	2109	ko03013//RNA transport;ko03015//mRNA surveillance pathway	Genetic Information Processing	Translation	-1.02093	7.96174e-111	6.01768e-112	K02184//formin 2;K14325//RNA-binding protein with serine-rich domain 1+ko03015//mRNA surveillance pathway+ko03013//RNA transport;K02184//formin 2;K14325//RNA-binding protein with serine-rich domain 1+ko03015//mRNA surveillance pathway+ko03013//RNA transport;K14325//RNA-binding protein with serine-rich domain 1+ko03015//mRNA surveillance pathway+ko03013//RNA transport	Domain of unknown function (DUF4217)		PREDICTED: nascent polypeptide-associated complex subunit alpha, muscle-specific form-like [Musa acuminata subsp. malaccensis]	[T] KOG1187 Serine/threonine protein kinase	Proline-rich receptor-like protein kinase PERK2 OS=Arabidopsis thaliana GN=PERK2 PE=2 SV=3	GO:0005509//calcium ion binding
Unigene33465_All	1532	ko03013//RNA transport	Genetic Information Processing	Translation	-1.02376	4.71341e-43	7.03306e-44	K14306//nuclear pore complex protein Nup62+ko03013//RNA transport;K14306//nuclear pore complex protein Nup62+ko03013//RNA transport;K17046//protein DEK	Transcription cofactor vestigial-like protein 4		hypothetical protein F442_06973 [Phytophthora parasitica P10297]	[GO] KOG4157 beta-1,6-N-acetylglucosaminyltransferase, contains WSC domain	Acidic leucine-rich nuclear phosphoprotein 32-related protein 2 OS=Oryza sativa subsp. japonica GN=Os03g0668900 PE=2 SV=1	GO:0003723//RNA binding
Unigene22040_All	737	ko03013//RNA transport	Genetic Information Processing	Translation	-1.02539	1.16429e-06	6.09511e-07	K03243//translation initiation factor 5B+ko03013//RNA transport;K03243//translation initiation factor 5B+ko03013//RNA transport;K02184//formin 2;K02184//formin 2;K03243//translation initiation factor 5B+ko03013//RNA transport	Protein of unknown function (DUF1501)		translation initiation factor aIF-2 [Phytophthora parasitica] >ETP17597.1 translation initiation factor aIF-2 [Phytophthora parasitica CJ01A1]	[J] KOG1144 Translation initiation factor 5B (eIF-5B)	Formin-like protein 16 OS=Oryza sativa subsp. japonica GN=FH16 PE=2 SV=1	GO:0003743//translation initiation factor activity;GO:0005525//GTP binding;GO:0003924//GTPase activity
Unigene44742_All	1516	ko03013//RNA transport;ko04141//Protein processing in endoplasmic reticulum	Genetic Information Processing	Folding, sorting and degradation;Translation	-1.02543	1.92789e-05	1.15331e-05	K14004//protein transport protein SEC13+ko04141//Protein processing in endoplasmic reticulum+ko03013//RNA transport	WD domain, G-beta repeat		Protein transport protein SEC13 [Phytophthora megakarya]	[U] KOG1332 Vesicle coat complex COPII, subunit SEC13	Protein transport protein SEC13 homolog B OS=Arabidopsis thaliana GN=SEC13B PE=1 SV=1
CL4078.Contig3_All	1391	ko03015//mRNA surveillance pathway;ko03013//RNA transport	Genetic Information Processing	Translation	-1.03025	6.62295e-37	1.1064e-37	K14325//RNA-binding protein with serine-rich domain 1+ko03015//mRNA surveillance pathway+ko03013//RNA transport;K14325//RNA-binding protein with serine-rich domain 1+ko03015//mRNA surveillance pathway+ko03013//RNA transport;K14325//RNA-binding protein with serine-rich domain 1+ko03015//mRNA surveillance pathway+ko03013//RNA transport;K22020//mucin-19	CRT-like, chloroquine-resistance transporter-like		hypothetical protein Naga_101129g2 [Nannochloropsis gaditana]	[A] KOG1869 Splicing coactivator SRm160/300, subunit SRm300	Proline-rich receptor-like protein kinase PERK9 OS=Arabidopsis thaliana GN=PERK9 PE=1 SV=1	GO:0016021//integral component of membrane
CL2720.Contig2_All	1637	ko03013//RNA transport;ko03015//mRNA surveillance pathway	Genetic Information Processing	Translation	-1.03095	1.21034e-07	5.79215e-08	K13171//serine/arginine repetitive matrix protein 1+ko03015//mRNA surveillance pathway+ko03013//RNA transport;K13171//serine/arginine repetitive matrix protein 1+ko03015//mRNA surveillance pathway+ko03013//RNA transport;K14325//RNA-binding protein with serine-rich domain 1+ko03015//mRNA surveillance pathway+ko03013//RNA transport;K13171//serine/arginine repetitive matrix protein 1+ko03015//mRNA s…	4Fe-4S dicluster domain		putative scytonemin-related tyrosinase [Ectocarpus siliculosus]	[A] KOG1869 Splicing coactivator SRm160/300, subunit SRm300	Proline-rich receptor-like protein kinase PERK8 OS=Arabidopsis thaliana GN=PERK8 PE=1 SV=1	GO:0046872//metal ion binding;GO:0016491//oxidoreductase activity
Unigene19990_All	614	ko03015//mRNA surveillance pathway;ko03013//RNA transport	Genetic Information Processing	Translation	-1.0344	0.000412399	0.000297302	K14325//RNA-binding protein with serine-rich domain 1+ko03015//mRNA surveillance pathway+ko03013//RNA transport;K02184//formin 2;K22020//mucin-19;K14325//RNA-binding protein with serine-rich domain 1+ko03015//mRNA surveillance pathway+ko03013//RNA transport;K14325//RNA-binding protein with serine-rich domain 1+ko03015//mRNA surveillance pathway+ko03013//RNA transport			hypothetical protein BU14_0463s0017 [Porphyra umbilicalis]	[W] KOG3544 Collagens (type IV and type XIII), and related proteins	Serine/arginine-rich splicing factor SR45 OS=Arabidopsis thaliana GN=SR45 PE=1 SV=1
CL11200.Contig18_All	1305	ko03015//mRNA surveillance pathway;ko03013//RNA transport	Genetic Information Processing	Translation	-1.03801	2.37373e-12	8.30413e-13	K18626//trichohyalin;K13171//serine/arginine repetitive matrix protein 1+ko03015//mRNA surveillance pathway+ko03013//RNA transport			neurofilament protein [Blastocystis sp. ATCC 50177/Nand II]	[N] LSE2785 H Caldesmon 1	Vicilin-like seed storage protein At2g18540 OS=Arabidopsis thaliana GN=At2g18540 PE=3 SV=1
Unigene4382_All	4241	ko03015//mRNA surveillance pathway;ko03013//RNA transport	Genetic Information Processing	Translation	-1.03899	1.01787e-27	2.07851e-28	K22020//mucin-19;K13171//serine/arginine repetitive matrix protein 1+ko03015//mRNA surveillance pathway+ko03013//RNA transport;K13171//serine/arginine repetitive matrix protein 1+ko03015//mRNA surveillance pathway+ko03013//RNA transport			PREDICTED: trichohyalin-like, partial [Ipomoea nil]	[W] KOG3544 Collagens (type IV and type XIII), and related proteins	Protein argonaute PNH1 OS=Oryza sativa subsp. japonica GN=PHN1 PE=2 SV=1
CL179.Contig2_All	4528	ko00040//Pentose and glucuronate interconversions;ko01100//Metabolic pathways;ko03015//mRNA surveillance pathway;ko03013//RNA transport;ko03040//Spliceosome	Genetic Information Processing;Metabolism	Transcription;Global and overview maps;Carbohydrate metabolism;Translation	-1.04258	6.18287e-22	1.47134e-22	K12875//apoptotic chromatin condensation inducer in the nucleus+ko03040//Spliceosome+ko03015//mRNA surveillance pathway+ko03013//RNA transport;K01051//pectinesterase [EC:3.1.1.11]+ko00040//Pentose and glucuronate interconversions+ko01100//Metabolic pathways;K12418//acyl-lipid (7-3)-desaturase (Delta-4 desaturase) [EC:1.14.19.31]	REJ domain		lpxtg-motif cell wall anchor domain protein [Nannochloropsis gaditana]	[LR] LSE0097 Y DNA helicase	Lysine-rich arabinogalactan protein 19 OS=Arabidopsis thaliana GN=AGP19 PE=2 SV=2	GO:0016021//integral component of membrane
Unigene14091_All	3062	ko03013//RNA transport;ko03015//mRNA surveillance pathway	Genetic Information Processing	Translation	-1.04271	2.35282e-18	6.33815e-19	K13171//serine/arginine repetitive matrix protein 1+ko03015//mRNA surveillance pathway+ko03013//RNA transport;K13171//serine/arginine repetitive matrix protein 1+ko03015//mRNA surveillance pathway+ko03013//RNA transport;K13171//serine/arginine repetitive matrix protein 1+ko03015//mRNA surveillance pathway+ko03013//RNA transport;K13171//serine/arginine repetitive matrix protein 1+ko03015//mRNA sur…	Tar ligand binding domain homologue		PREDICTED: serine/arginine repetitive matrix protein 1 [Raphanus sativus]	[J] KOG1041 Translation initiation factor 2C (eIF-2C) and related proteins	Protein argonaute 3 OS=Arabidopsis thaliana GN=AGO3 PE=3 SV=1	GO:0006397//mRNA processing;GO:0008380//RNA splicing
CL131.Contig1_All	1158	ko03013//RNA transport	Genetic Information Processing	Translation	-1.04303	4.18675e-10	1.6746e-10	K14306//nuclear pore complex protein Nup62+ko03013//RNA transport;K14306//nuclear pore complex protein Nup62+ko03013//RNA transport;K14306//nuclear pore complex protein Nup62+ko03013//RNA transport;K14306//nuclear pore complex protein Nup62+ko03013//RNA transport;K14306//nuclear pore complex protein Nup62+ko03013//RNA transport	TFIIB zinc-binding	XM_021426715.1 PREDICTED: Herrania umbratica something about silencing protein 10 (LOC110415159), mRNA	uncharacterized protein DDB_G0271670, partial [Zea mays]	[Y] KOG2992 Nucleolar GTPase/ATPase p130	Splicing factor U2af large subunit A OS=Triticum aestivum GN=U2AF65A PE=2 SV=1
CL11143.Contig4_All	2580	ko03013//RNA transport;ko03015//mRNA surveillance pathway	Genetic Information Processing	Translation	-1.04316	0.00014186	9.49758e-05	K13171//serine/arginine repetitive matrix protein 1+ko03015//mRNA surveillance pathway+ko03013//RNA transport	Protein of unknown function (DUF3611)	AP009361.1 Solanum lycopersicum genomic DNA, chromosome 8, clone: C08HBa0074F18, complete sequence	hypothetical protein FisN_13Hh310 [Fistulifera solaris]		Protein TIC 21, chloroplastic OS=Arabidopsis thaliana GN=TIC21 PE=1 SV=1	GO:0016021//integral component of membrane
CL393.Contig2_All	839	ko03013//RNA transport;ko03015//mRNA surveillance pathway	Genetic Information Processing	Translation	-1.05012	3.71921e-07	1.85756e-07	K13171//serine/arginine repetitive matrix protein 1+ko03015//mRNA surveillance pathway+ko03013//RNA transport;K13171//serine/arginine repetitive matrix protein 1+ko03015//mRNA surveillance pathway+ko03013//RNA transport;K13171//serine/arginine repetitive matrix protein 1+ko03015//mRNA surveillance pathway+ko03013//RNA transport;K14325//RNA-binding protein with serine-rich domain 1+ko03015//mRNA s…	KAP family P-loop domain		hypothetical protein BU14_0180s0014, partial [Porphyra umbilicalis]	[R] KOG0502 Integral membrane ankyrin-repeat protein Kidins220 (protein kinase D substrate)	Serine/arginine-rich SC35-like splicing factor SCL33 OS=Arabidopsis thaliana GN=SCL33 PE=1 SV=1
Unigene17956_All	2535	ko03013//RNA transport	Genetic Information Processing	Translation	-1.05098	1.23691e-27	2.53126e-28	K02184//formin 2;K14306//nuclear pore complex protein Nup62+ko03013//RNA transport;K02184//formin 2	SGF29 tudor-like domain		hypothetical protein THRCLA_20376 [Thraustotheca clavata]	[ZR] LSE0118 A Protein possibly involved in cytoskeleton rearrangements, contains FH domain	Formin-like protein 20 OS=Arabidopsis thaliana GN=FH20 PE=2 SV=3	GO:0005509//calcium ion binding
Unigene8914_All	843	ko03013//RNA transport;ko03015//mRNA surveillance pathway	Genetic Information Processing	Translation	-1.05248	1.93165e-15	5.84734e-16	K14325//RNA-binding protein with serine-rich domain 1+ko03015//mRNA surveillance pathway+ko03013//RNA transport;K14325//RNA-binding protein with serine-rich domain 1+ko03015//mRNA surveillance pathway+ko03013//RNA transport;K14325//RNA-binding protein with serine-rich domain 1+ko03015//mRNA surveillance pathway+ko03013//RNA transport;K14325//RNA-binding protein with serine-rich domain 1+ko03015//…			hypothetical protein BU14_0082s0028 [Porphyra umbilicalis]	[A] KOG1869 Splicing coactivator SRm160/300, subunit SRm300	Cilia- and flagella-associated protein 65 (Fragment) OS=Chlamydomonas reinhardtii GN=CFAP65 PE=1 SV=1
Unigene438_All	1861	ko03013//RNA transport	Genetic Information Processing	Translation	-1.05261	4.27764e-27	8.86232e-28	K22020//mucin-19;K14306//nuclear pore complex protein Nup62+ko03013//RNA transport;K14306//nuclear pore complex protein Nup62+ko03013//RNA transport;K14306//nuclear pore complex protein Nup62+ko03013//RNA transport	KH domain		plus agglutinin [Chlamydomonas reinhardtii]	[W] LSE0516 C Uncharacterized protein, contains major sperm protein (MSP) domain	Protein Ycf2 OS=Oenothera argillicola GN=ycf2-A PE=3 SV=1
Unigene38695_All	495	ko03013//RNA transport;ko03015//mRNA surveillance pathway	Genetic Information Processing	Translation	-1.05326	0.000212622	0.000146503	K02184//formin 2;K02184//formin 2;K14325//RNA-binding protein with serine-rich domain 1+ko03015//mRNA surveillance pathway+ko03013//RNA transport;K14325//RNA-binding protein with serine-rich domain 1+ko03015//mRNA surveillance pathway+ko03013//RNA transport		XM_003063269.1 Micromonas pusilla CCMP1545 predicted protein, mRNA	hypothetical protein BU14_0235s0010 [Porphyra umbilicalis]	[ZR] LSE0118 A Protein possibly involved in cytoskeleton rearrangements, contains FH domain	Formin-like protein 18 OS=Oryza sativa subsp. japonica GN=FH18 PE=2 SV=1
Unigene44723_All	920	ko03013//RNA transport;ko00940//Phenylpropanoid biosynthesis;ko03015//mRNA surveillance pathway;ko01100//Metabolic pathways;ko01110//Biosynthesis of secondary metabolites	Metabolism;Genetic Information Processing	Global and overview maps;Translation;Biosynthesis of other secondary metabolites	-1.05377	0.00025538	0.000177711	K13171//serine/arginine repetitive matrix protein 1+ko03015//mRNA surveillance pathway+ko03013//RNA transport;K13171//serine/arginine repetitive matrix protein 1+ko03015//mRNA surveillance pathway+ko03013//RNA transport;K00430//peroxidase [EC:1.11.1.7]+ko01100//Metabolic pathways+ko01110//Biosynthesis of secondary metabolites+ko00940//Phenylpropanoid biosynthesis;K13171//serine/arginine repetitiv…	Cyclic nucleotide-binding domain		hypothetical protein BU14_0361s0001 [Porphyra umbilicalis]	[AR] KOG2146 Splicing coactivator SRm160/300, subunit SRm160 (contains PWI domain)	Formin-like protein 18 OS=Oryza sativa subsp. japonica GN=FH18 PE=2 SV=1	GO:0016021//integral component of membrane
Unigene6621_All	2754	ko03013//RNA transport;ko03015//mRNA surveillance pathway	Genetic Information Processing	Translation	-1.05385	0.000244444	0.000169767	K22020//mucin-19;K14325//RNA-binding protein with serine-rich domain 1+ko03015//mRNA surveillance pathway+ko03013//RNA transport;K06627//cyclin-A	MYND finger		hypothetical protein BU14_0251s0002 [Porphyra umbilicalis]	[K] KOG0485 Transcription factor NKX-5.1/HMX1, contains HOX domain	Vegetative cell wall protein gp1 OS=Chlamydomonas reinhardtii GN=GP1 PE=1 SV=1
CL6583.Contig2_All	2292	ko03013//RNA transport;ko03015//mRNA surveillance pathway	Genetic Information Processing	Translation	-1.05488	9.44758e-234	4.01879e-235	K16628//collagen, type VII, alpha;K22020//mucin-19;K14325//RNA-binding protein with serine-rich domain 1+ko03015//mRNA surveillance pathway+ko03013//RNA transport;K14325//RNA-binding protein with serine-rich domain 1+ko03015//mRNA surveillance pathway+ko03013//RNA transport;K05740//diaphanous 1+ko04933//AGE-RAGE signaling pathway in diabetic complications	Glycosyl hydrolases family 16		glucan binding protein-1 [Actinophrys sol]	[WV] KOG1216 von Willebrand factor and related coagulation proteins		GO:0004553//hydrolase activity, hydrolyzing O-glycosyl compounds;GO:0005975//carbohydrate metabolic process;GO:0016021//integral component of membrane
Unigene33869_All	844	ko03013//RNA transport;ko03015//mRNA surveillance pathway	Genetic Information Processing	Translation	-1.06189	1.24895e-05	7.30247e-06	K13171//serine/arginine repetitive matrix protein 1+ko03015//mRNA surveillance pathway+ko03013//RNA transport;K13171//serine/arginine repetitive matrix protein 1+ko03015//mRNA surveillance pathway+ko03013//RNA transport;K22020//mucin-19;K13171//serine/arginine repetitive matrix protein 1+ko03015//mRNA surveillance pathway+ko03013//RNA transport	C2 domain		expressed unknown protein [Ectocarpus siliculosus]	[W] KOG3544 Collagens (type IV and type XIII), and related proteins		GO:0005509//calcium ion binding
CL870.Contig7_All	1946	ko03013//RNA transport	Genetic Information Processing	Translation	-1.06287	2.03313e-64	2.27928e-65	K03231//elongation factor 1-alpha+ko03013//RNA transport;K03231//elongation factor 1-alpha+ko03013//RNA transport;K03231//elongation factor 1-alpha+ko03013//RNA transport;K03231//elongation factor 1-alpha+ko03013//RNA transport;K03231//elongation factor 1-alpha+ko03013//RNA transport	Elongation factor Tu GTP binding domain	AY729814.1 Heterosigma akashiwo elongation factor 1 alpha-like gene, partial sequence	hypothetical protein PHYSODRAFT_354062 [Phytophthora sojae] >XP_009520658.1 hypothetical protein PHYSODRAFT_354065 [Phytophthora sojae] >EGZ25258.1 hypothetical protein PHYSODRAFT_354062 [Phytophthora sojae] >EGZ25370.1 hypothetical protein PHYSODRAFT_354065 [Phytophthora sojae]	[J] KOG0052 Translation elongation factor EF-1 alpha/Tu	Elongation factor 1-alpha 1 OS=Arabidopsis thaliana GN=A1 PE=1 SV=1	GO:0003746//translation elongation factor activity;GO:0005525//GTP binding;GO:0005737//cytoplasm;GO:0003924//GTPase activity
CL8024.Contig3_All	2243	ko03013//RNA transport	Genetic Information Processing	Translation	-1.06378	8.65174e-43	1.29862e-43	K14306//nuclear pore complex protein Nup62+ko03013//RNA transport;K14306//nuclear pore complex protein Nup62+ko03013//RNA transport;K14306//nuclear pore complex protein Nup62+ko03013//RNA transport;K14306//nuclear pore complex protein Nup62+ko03013//RNA transport;K14306//nuclear pore complex protein Nup62+ko03013//RNA transport	RNA recognition motif. (a.k.a. RRM, RBD, or RNP domain)	XM_005850606.1 Chlorella variabilis hypothetical protein (CHLNCDRAFT_140706) mRNA, complete cds	hypothetical protein Csa_6G108530 [Cucumis sativus]	[T] KOG2085 Serine/threonine protein phosphatase 2A, regulatory subunit	Flagellar radial spoke protein 2 OS=Chlamydomonas reinhardtii GN=RSP2 PE=1 SV=1
CL1253.Contig2_All	1589	ko04141//Protein processing in endoplasmic reticulum;ko03015//mRNA surveillance pathway;ko03013//RNA transport	Genetic Information Processing	Translation;Folding, sorting and degradation	-1.06405	7.31105e-12	2.63045e-12	K14007//protein transport protein SEC24+ko04141//Protein processing in endoplasmic reticulum;K13171//serine/arginine repetitive matrix protein 1+ko03015//mRNA surveillance pathway+ko03013//RNA transport	His Kinase A (phospho-acceptor) domain		hypothetical protein BU14_0077s0056 [Porphyra umbilicalis]
CL4235.Contig4_All	1339	ko03013//RNA transport	Genetic Information Processing	Translation	-1.06417	5.11121e-16	1.5134e-16	K17987//next to BRCA1 gene 1 protein;K14306//nuclear pore complex protein Nup62+ko03013//RNA transport;K14306//nuclear pore complex protein Nup62+ko03013//RNA transport;K14306//nuclear pore complex protein Nup62+ko03013//RNA transport	Transcription factor IIA, alpha/beta subunit		hypothetical protein EMIHUDRAFT_97878 [Emiliania huxleyi CCMP1516] >EOD39717.1 hypothetical protein EMIHUDRAFT_97878 [Emiliania huxleyi CCMP1516]	[J] KOG0401 Translation initiation factor 4F, ribosome/mRNA-bridging subunit (eIF-4G)	Flagellar radial spoke protein 2 OS=Chlamydomonas reinhardtii GN=RSP2 PE=1 SV=1	GO:0035091//phosphatidylinositol binding
CL4892.Contig2_All	2286	ko03013//RNA transport;ko03040//Spliceosome	Genetic Information Processing	Translation;Transcription	-1.06738	5.6687e-43	8.46876e-44	K12878//THO complex subunit 1+ko03040//Spliceosome+ko03013//RNA transport;K12878//THO complex subunit 1+ko03040//Spliceosome+ko03013//RNA transport;K12878//THO complex subunit 1+ko03040//Spliceosome+ko03013//RNA transport;K12878//THO complex subunit 1+ko03040//Spliceosome+ko03013//RNA transport	THO complex subunit 1 transcription elongation factor	AK366095.1 Hordeum vulgare subsp. vulgare mRNA for predicted protein, complete cds, clone: NIASHv2040F11	Nuclear matrix protein [Plasmopara halstedii]	[TZ] KOG3671 Actin regulatory protein (Wiskott-Aldrich syndrome protein)	Formin-like protein 6 OS=Oryza sativa subsp. japonica GN=FH6 PE=2 SV=2
Unigene41199_All	819	ko03015//mRNA surveillance pathway;ko03013//RNA transport	Genetic Information Processing	Translation	-1.06835	7.6358e-05	4.91683e-05	K22020//mucin-19;K13171//serine/arginine repetitive matrix protein 1+ko03015//mRNA surveillance pathway+ko03013//RNA transport;K06236//collagen, type I, alpha+ko04933//AGE-RAGE signaling pathway in diabetic complications	Potassium channel Kv1.4 tandem inactivation domain		hypothetical protein BU14_0217s0021 [Porphyra umbilicalis]	[AR] KOG2146 Splicing coactivator SRm160/300, subunit SRm160 (contains PWI domain)	Oleosin-B6 OS=Brassica napus GN=OlnB6 PE=1 SV=3
Unigene18163_All	1496	ko03013//RNA transport;ko03018//RNA degradation;ko03015//mRNA surveillance pathway	Genetic Information Processing	Translation;Folding, sorting and degradation	-1.06899	5.67849e-82	5.32666e-83	K13126//polyadenylate-binding protein+ko03015//mRNA surveillance pathway+ko03018//RNA degradation+ko03013//RNA transport;K13161//heterogeneous nuclear ribonucleoprotein R;K13161//heterogeneous nuclear ribonucleoprotein R;K13126//polyadenylate-binding protein+ko03015//mRNA surveillance pathway+ko03018//RNA degradation+ko03013//RNA transport;K13126//polyadenylate-binding protein+ko03015//mRNA surve…	RNA recognition motif. (a.k.a. RRM, RBD, or RNP domain)		tia1 cytotoxic granule-associated rna binding protein [Nannochloropsis gaditana]	[A] KOG0145 RNA-binding protein ELAV/HU (RRM superfamily)	Polyadenylate-binding protein RBP45C OS=Arabidopsis thaliana GN=RBP45C PE=2 SV=1	GO:0003723//RNA binding;GO:0016021//integral component of membrane
Unigene29337_All	3851	ko03015//mRNA surveillance pathway;ko03018//RNA degradation;ko03013//RNA transport	Genetic Information Processing	Translation;Folding, sorting and degradation	-1.06995	0	0	K22020//mucin-19;K14325//RNA-binding protein with serine-rich domain 1+ko03015//mRNA surveillance pathway+ko03013//RNA transport;K03514//non-canonical poly(A) RNA polymerase PAPD5/7 [EC:2.7.7.19]+ko03018//RNA degradation;K14325//RNA-binding protein with serine-rich domain 1+ko03015//mRNA surveillance pathway+ko03013//RNA transport;K14325//RNA-binding protein with serine-rich domain 1+ko03015//mRN…	ATP:guanido phosphotransferase, C-terminal catalytic domain	CT837280.1 Oryza sativa (indica cultivar-group) cDNA clone:OSIGCRA112N04, full insert sequence	hypothetical protein EMIHUDRAFT_452258 [Emiliania huxleyi CCMP1516] >EOD12102.1 hypothetical protein EMIHUDRAFT_452258 [Emiliania huxleyi CCMP1516]	[C] KOG3581 Creatine kinases		GO:0005524//ATP binding;GO:0016301//kinase activity
Unigene38435_All	1229	ko03013//RNA transport;ko03015//mRNA surveillance pathway	Genetic Information Processing	Translation	-1.07039	1.21337e-75	1.20994e-76	K14325//RNA-binding protein with serine-rich domain 1+ko03015//mRNA surveillance pathway+ko03013//RNA transport	Phytanoyl-CoA dioxygenase (PhyH)		hypothetical protein BU14_0014s0090 [Porphyra umbilicalis]	[Z] KOG1820 Microtubule-associated protein	Vegetative cell wall protein gp1 OS=Chlamydomonas reinhardtii GN=GP1 PE=1 SV=1
Unigene12918_All	7658	ko00520//Amino sugar and nucleotide sugar metabolism;ko03013//RNA transport;ko03015//mRNA surveillance pathway;ko00940//Phenylpropanoid biosynthesis;ko03040//Spliceosome;ko01100//Metabolic pathways;ko01110//Biosynthesis of secondary metabolites	Metabolism;Genetic Information Processing	Biosynthesis of other secondary metabolites;Carbohydrate metabolism;Transcription;Translation;Global and overview maps	-1.07118	3.97276e-115	2.91482e-116	K01183//chitinase [EC:3.2.1.14]+ko00520//Amino sugar and nucleotide sugar metabolism+ko01100//Metabolic pathways;K01183//chitinase [EC:3.2.1.14]+ko00520//Amino sugar and nucleotide sugar metabolism+ko01100//Metabolic pathways;K00430//peroxidase [EC:1.11.1.7]+ko01100//Metabolic pathways+ko01110//Biosynthesis of secondary metabolites+ko00940//Phenylpropanoid biosynthesis;K12875//apoptotic chromatin…	PT repeat		Extracellular matrix protein A [Symbiodinium microadriaticum]	[M] LSE0601 A Pollen extensin-like protein (Pex)	Non-classical arabinogalactan protein 30 OS=Arabidopsis thaliana GN=AGP30 PE=2 SV=1	GO:0016539//intein-mediated protein splicing;GO:0008233//peptidase activity;GO:0016021//integral component of membrane
Unigene33384_All	5702	ko03015//mRNA surveillance pathway;ko03013//RNA transport	Genetic Information Processing	Translation	-1.07156	8.40455e-39	1.35195e-39	K02184//formin 2;K22020//mucin-19;K13171//serine/arginine repetitive matrix protein 1+ko03015//mRNA surveillance pathway+ko03013//RNA transport;K17987//next to BRCA1 gene 1 protein;K13171//serine/arginine repetitive matrix protein 1+ko03015//mRNA surveillance pathway+ko03013//RNA transport	EGF domain		conserved unknown protein [Ectocarpus siliculosus]	[K] KOG2341 TATA box binding protein (TBP)-associated factor, RNA polymerase II	Oleosin-B6 OS=Brassica napus GN=OlnB6 PE=1 SV=3	GO:0005201//extracellular matrix structural constituent;GO:0005509//calcium ion binding;GO:0016021//integral component of membrane;GO:0005578//proteinaceous extracellular matrix
CL11012.Contig10_All	9272	ko03013//RNA transport;ko03015//mRNA surveillance pathway	Genetic Information Processing	Translation	-1.07194	2.83669e-47	3.97943e-48	K13171//serine/arginine repetitive matrix protein 1+ko03015//mRNA surveillance pathway+ko03013//RNA transport;K13171//serine/arginine repetitive matrix protein 1+ko03015//mRNA surveillance pathway+ko03013//RNA transport;K13171//serine/arginine repetitive matrix protein 1+ko03015//mRNA surveillance pathway+ko03013//RNA transport;K13171//serine/arginine repetitive matrix protein 1+ko03015//mRNA sur…	Histone methylation protein DOT1		serine/arginine repetitive matrix protein 1 isoform X2 [Amborella trichopoda] >ERN08012.1 hypothetical protein AMTR_s00012p00256890 [Amborella trichopoda]
Unigene14402_All	1958	ko03013//RNA transport	Genetic Information Processing	Translation	-1.0742	2.54222e-23	5.80379e-24	K14306//nuclear pore complex protein Nup62+ko03013//RNA transport;K14306//nuclear pore complex protein Nup62+ko03013//RNA transport;K14306//nuclear pore complex protein Nup62+ko03013//RNA transport;K14306//nuclear pore complex protein Nup62+ko03013//RNA transport;K14306//nuclear pore complex protein Nup62+ko03013//RNA transport	Procyclic acidic repetitive protein (PARP)	XM_016687319.1 PREDICTED: Capsicum annuum E3 ubiquitin-protein ligase RFWD3 (LOC107843135), transcript variant X1, mRNA	plus agglutinin, partial [Chlamydomonas incerta]	[A] KOG1869 Splicing coactivator SRm160/300, subunit SRm300	Oleosin-B6 OS=Brassica napus GN=OlnB6 PE=1 SV=3
CL475.Contig6_All	2291	ko03013//RNA transport	Genetic Information Processing	Translation	-1.07647	1.05539e-09	4.33103e-10	K19719//collagen, type II, alpha;K22020//mucin-19;K03243//translation initiation factor 5B+ko03013//RNA transport;K03243//translation initiation factor 5B+ko03013//RNA transport	CUT1-like DNA-binding domain of SATB		PREDICTED: hornerin-like, partial [Ipomoea nil]	[A] KOG2253 U1 snRNP complex, subunit SNU71 and related PWI-motif proteins	FHA domain-containing protein DDL OS=Arabidopsis thaliana GN=DDL PE=1 SV=1
Unigene14954_All	2922	ko03013//RNA transport	Genetic Information Processing	Translation	-1.07791	1.73934e-17	4.83945e-18	K17987//next to BRCA1 gene 1 protein;K14306//nuclear pore complex protein Nup62+ko03013//RNA transport;K14306//nuclear pore complex protein Nup62+ko03013//RNA transport;K14306//nuclear pore complex protein Nup62+ko03013//RNA transport;K14306//nuclear pore complex protein Nup62+ko03013//RNA transport	Domain of unknown function (DUF4148)		PREDICTED: vegetative cell wall protein gp1-like [Vigna angularis]		Nuclear pore complex protein NUP62 OS=Arabidopsis thaliana GN=NUP62 PE=1 SV=1
Unigene1278_All	655	ko03013//RNA transport;ko03015//mRNA surveillance pathway	Genetic Information Processing	Translation	-1.07813	6.47145e-07	3.30701e-07	K15542//polyadenylation factor subunit 2+ko03015//mRNA surveillance pathway;K14325//RNA-binding protein with serine-rich domain 1+ko03015//mRNA surveillance pathway+ko03013//RNA transport;K02184//formin 2;K10990//RecQ-mediated genome instability protein 1			hypothetical protein H257_06035 [Aphanomyces astaci] >ETV81548.1 hypothetical protein H257_06035 [Aphanomyces astaci]	[T] LSE2669 H Opioid growth factor receptor	Classical arabinogalactan protein 7 OS=Arabidopsis thaliana GN=AGP7 PE=1 SV=2	GO:0005509//calcium ion binding
CL3528.Contig2_All	1976	ko03013//RNA transport;ko03015//mRNA surveillance pathway	Genetic Information Processing	Translation	-1.07849	4.2139e-16	1.24288e-16	K19719//collagen, type II, alpha;K14325//RNA-binding protein with serine-rich domain 1+ko03015//mRNA surveillance pathway+ko03013//RNA transport;K02184//formin 2;K02184//formin 2	Nucleocapsid protein N	XM_021870431.1 PREDICTED: Chenopodium quinoa protein WEAK CHLOROPLAST MOVEMENT UNDER BLUE LIGHT 1-like (LOC110693271), transcript variant X1, mRNA	hypothetical protein AURANDRAFT_71219, partial [Aureococcus anophagefferens] >EGB10311.1 hypothetical protein AURANDRAFT_71219, partial [Aureococcus anophagefferens]	[W] KOG3544 Collagens (type IV and type XIII), and related proteins
Unigene45940_All	1313	ko03013//RNA transport;ko03015//mRNA surveillance pathway	Genetic Information Processing	Translation	-1.08137	4.87807e-25	1.06322e-25	K13171//serine/arginine repetitive matrix protein 1+ko03015//mRNA surveillance pathway+ko03013//RNA transport;K04733//interleukin-1 receptor-associated kinase 4 [EC:2.7.11.1];K13171//serine/arginine repetitive matrix protein 1+ko03015//mRNA surveillance pathway+ko03013//RNA transport;K02184//formin 2	HMG-box domain		Pollen-specific leucine-rich repeat extensin-like protein 1 [Dichanthelium oligosanthes]	[AR] KOG2146 Splicing coactivator SRm160/300, subunit SRm160 (contains PWI domain)	Glycine-rich protein DOT1 OS=Arabidopsis thaliana GN=DOT1 PE=2 SV=1
CL5897.Contig2_All	1452	ko03013//RNA transport	Genetic Information Processing	Translation	-1.08437	6.21996e-06	3.51764e-06	K14306//nuclear pore complex protein Nup62+ko03013//RNA transport;K14306//nuclear pore complex protein Nup62+ko03013//RNA transport;K14306//nuclear pore complex protein Nup62+ko03013//RNA transport	DUF2407 C-terminal domain		uncharacterized protein [Blastocystis hominis] >CBK21500.2 unnamed protein product [Blastocystis hominis]	[TV] KOG4297 C-type lectin		GO:0008234//cysteine-type peptidase activity
Unigene27079_All	1209	ko03040//Spliceosome;ko01100//Metabolic pathways;ko00040//Pentose and glucuronate interconversions;ko03015//mRNA surveillance pathway;ko03013//RNA transport	Metabolism;Genetic Information Processing	Carbohydrate metabolism;Transcription;Global and overview maps;Translation	-1.08503	0.00096268	0.000735226	K12875//apoptotic chromatin condensation inducer in the nucleus+ko03040//Spliceosome+ko03015//mRNA surveillance pathway+ko03013//RNA transport;K01051//pectinesterase [EC:3.1.1.11]+ko00040//Pentose and glucuronate interconversions+ko01100//Metabolic pathways;K01051//pectinesterase [EC:3.1.1.11]+ko00040//Pentose and glucuronate interconversions+ko01100//Metabolic pathways	FG-GAP repeat		hypothetical protein FRACYDRAFT_232027 [Fragilariopsis cylindrus CCMP1102]	[WV] KOG1216 von Willebrand factor and related coagulation proteins	Non-classical arabinogalactan protein 30 OS=Arabidopsis thaliana GN=AGP30 PE=2 SV=1
Unigene30266_All	718	ko03013//RNA transport	Genetic Information Processing	Translation	-1.0855	2.10191e-29	4.11921e-30	K03754//translation initiation factor eIF-2B subunit beta+ko03013//RNA transport;K03754//translation initiation factor eIF-2B subunit beta+ko03013//RNA transport;K03754//translation initiation factor eIF-2B subunit beta+ko03013//RNA transport	Initiation factor 2 subunit family		translation initiation factor eif-2b subunit beta [Nannochloropsis gaditana]	[J] KOG1465 Translation initiation factor 2B, beta subunit (eIF-2Bbeta/GCD7)		GO:0044237//cellular metabolic process;GO:0005737//cytoplasm
CL2593.Contig3_All	2890	ko03013//RNA transport	Genetic Information Processing	Translation	-1.08989	5.76294e-22	1.37083e-22	K14439//SWI/SNF-related matrix-associated actin-dependent regulator of chromatin subfamily A containing DEAD/H box 1 [EC:3.6.4.12];K14306//nuclear pore complex protein Nup62+ko03013//RNA transport;K11493//regulator of chromosome condensation	TT viral orf 1		hypothetical protein BU14_0071s0060 [Porphyra umbilicalis]	[R] KOG1075 FOG: Reverse transcriptase		GO:0016021//integral component of membrane
CL5979.Contig2_All	2355	ko03015//mRNA surveillance pathway;ko03013//RNA transport	Genetic Information Processing	Translation	-1.09032	3.5463e-09	1.50866e-09	K22020//mucin-19;K17987//next to BRCA1 gene 1 protein;K13171//serine/arginine repetitive matrix protein 1+ko03015//mRNA surveillance pathway+ko03013//RNA transport;K14306//nuclear pore complex protein Nup62+ko03013//RNA transport			EsV-1-7 [Ectocarpus siliculosus]	[A] KOG1869 Splicing coactivator SRm160/300, subunit SRm300	Holliday junction resolvase MOC1, chloroplastic OS=Chlamydomonas reinhardtii GN=MOC1 PE=3 SV=2
CL5626.Contig3_All	2064	ko03013//RNA transport;ko03008//Ribosome biogenesis in eukaryotes	Genetic Information Processing	Translation	-1.09196	3.62509e-43	5.39602e-44	K07562//nonsense-mediated mRNA decay protein 3+ko03013//RNA transport+ko03008//Ribosome biogenesis in eukaryotes;K07562//nonsense-mediated mRNA decay protein 3+ko03013//RNA transport+ko03008//Ribosome biogenesis in eukaryotes	NMD3 family	KJ195045.1 Mesotaenium braunii neochrome mRNA, partial cds	hypothetical protein H310_07040 [Aphanomyces invadans] >ETW00402.1 hypothetical protein H310_07040 [Aphanomyces invadans]	[J] KOG2613 NMD protein affecting ribosome stability and mRNA decay	Formin-like protein 3 OS=Oryza sativa subsp. japonica GN=FH3 PE=2 SV=2	GO:0005634//nucleus;GO:0015031//protein transport;GO:0005737//cytoplasm
CL9869.Contig1_All	1872	ko03013//RNA transport	Genetic Information Processing	Translation	-1.09705	1.3207e-19	3.3931e-20	K17987//next to BRCA1 gene 1 protein;K22020//mucin-19;K14306//nuclear pore complex protein Nup62+ko03013//RNA transport	HOOK protein	CP023127.1 Lupinus angustiflorus cultivar Tanjil chromosome LG-15	conserved unknown protein [Ectocarpus siliculosus]	[A] KOG1869 Splicing coactivator SRm160/300, subunit SRm300	Oleosin-B6 OS=Brassica napus GN=OlnB6 PE=1 SV=3
CL4274.Contig2_All	5502	ko00040//Pentose and glucuronate interconversions;ko01100//Metabolic pathways;ko03013//RNA transport	Genetic Information Processing;Metabolism	Global and overview maps;Translation;Carbohydrate metabolism	-1.09876	8.62678e-24	1.94482e-24	K14306//nuclear pore complex protein Nup62+ko03013//RNA transport;K01051//pectinesterase [EC:3.1.1.11]+ko00040//Pentose and glucuronate interconversions+ko01100//Metabolic pathways	N-terminal segments of PfEMP1		predicted protein [Ostreococcus lucimarinus CCE9901] >ABP00443.1 predicted protein [Ostreococcus lucimarinus CCE9901]	[GO] KOG4157 beta-1,6-N-acetylglucosaminyltransferase, contains WSC domain
CL3058.Contig1_All	3139	ko03013//RNA transport	Genetic Information Processing	Translation	-1.10055	7.36703e-07	3.782e-07	K18626//trichohyalin;K10406//kinesin family member C2/C3;K03243//translation initiation factor 5B+ko03013//RNA transport	Cytochrome oxidase complex assembly protein 1		Flagellar attachment zone protein 1 [Symbiodinium microadriaticum]	[W] LSE0345 A 12S cruciferin seed storage protein/vicilin-like seed storage protein	Vicilin-like seed storage protein At2g18540 OS=Arabidopsis thaliana GN=At2g18540 PE=3 SV=1
Unigene30004_All	1278	ko03015//mRNA surveillance pathway;ko03013//RNA transport	Genetic Information Processing	Translation	-1.1009	4.13671e-06	2.2923e-06	K02184//formin 2;K13171//serine/arginine repetitive matrix protein 1+ko03015//mRNA surveillance pathway+ko03013//RNA transport;K13171//serine/arginine repetitive matrix protein 1+ko03015//mRNA surveillance pathway+ko03013//RNA transport;K13171//serine/arginine repetitive matrix protein 1+ko03015//mRNA surveillance pathway+ko03013//RNA transport;K22020//mucin-19	DNA primase DnaG DnaB-binding		LOW QUALITY PROTEIN: hypothetical protein BU14_0159s0022 [Porphyra umbilicalis]	[W] KOG3544 Collagens (type IV and type XIII), and related proteins	Formin-like protein 20 OS=Arabidopsis thaliana GN=FH20 PE=2 SV=3	GO:0009055//electron transfer activity
CL48.Contig2_All	1810	ko03015//mRNA surveillance pathway;ko03013//RNA transport	Genetic Information Processing	Translation	-1.10236	5.85018e-84	5.403e-85	K14325//RNA-binding protein with serine-rich domain 1+ko03015//mRNA surveillance pathway+ko03013//RNA transport	Periplasmic binding protein		hypothetical protein BU14_0381s0004 [Porphyra umbilicalis]	[WV] KOG1216 von Willebrand factor and related coagulation proteins
CL9035.Contig6_All	1982	ko03013//RNA transport;ko03015//mRNA surveillance pathway	Genetic Information Processing	Translation	-1.10259	1.09867e-35	1.88022e-36	K14325//RNA-binding protein with serine-rich domain 1+ko03015//mRNA surveillance pathway+ko03013//RNA transport	Major Facilitator Superfamily		major facilitator superfamily [Micromonas pusilla CCMP1545] >EEH58685.1 major facilitator superfamily [Micromonas pusilla CCMP1545]	[R] KOG0255 Synaptic vesicle transporter SVOP and related transporters (major facilitator superfamily)		GO:0055085//transmembrane transport;GO:0016021//integral component of membrane
Unigene367_All	1463	ko03015//mRNA surveillance pathway;ko03013//RNA transport	Genetic Information Processing	Translation	-1.10697	1.49925e-24	3.30783e-25	K22020//mucin-19;K16628//collagen, type VII, alpha;K14325//RNA-binding protein with serine-rich domain 1+ko03015//mRNA surveillance pathway+ko03013//RNA transport;K14325//RNA-binding protein with serine-rich domain 1+ko03015//mRNA surveillance pathway+ko03013//RNA transport	PHD-finger		hypothetical protein AURANDRAFT_68471 [Aureococcus anophagefferens] >EGB02888.1 hypothetical protein AURANDRAFT_68471 [Aureococcus anophagefferens]	[W] KOG3544 Collagens (type IV and type XIII), and related proteins	Protein CHROMATIN REMODELING 4 OS=Arabidopsis thaliana GN=CHR4 PE=2 SV=1	GO:0003677//DNA binding;GO:0005634//nucleus;GO:0016021//integral component of membrane
CL8278.Contig2_All	556	ko03013//RNA transport	Genetic Information Processing	Translation	-1.10962	2.36332e-10	9.30439e-11	K03243//translation initiation factor 5B+ko03013//RNA transport;K04508//transducin (beta)-like 1;K03243//translation initiation factor 5B+ko03013//RNA transport	Chromatin assembly factor 1 complex p150 subunit, N-terminal	XM_007509657.1 Bathycoccus prasinos predicted protein (Bathy12g00740), partial mRNA	uncharacterized protein [Blastocystis hominis] >CBK22299.2 unnamed protein product [Blastocystis hominis]	[Z] KOG3592 Microtubule-associated proteins	Vicilin-like seed storage protein At2g18540 OS=Arabidopsis thaliana GN=At2g18540 PE=3 SV=1
CL3651.Contig3_All	1945	ko03013//RNA transport;ko03015//mRNA surveillance pathway	Genetic Information Processing	Translation	-1.1107	4.71176e-28	9.54228e-29	K14325//RNA-binding protein with serine-rich domain 1+ko03015//mRNA surveillance pathway+ko03013//RNA transport;K14325//RNA-binding protein with serine-rich domain 1+ko03015//mRNA surveillance pathway+ko03013//RNA transport;K14325//RNA-binding protein with serine-rich domain 1+ko03015//mRNA surveillance pathway+ko03013//RNA transport;K14325//RNA-binding protein with serine-rich domain 1+ko03015//…	HAD-hyrolase-like		TIGR01456 family HAD hydrolase [Aphanomyces astaci] >ETV88198.1 TIGR01456 family HAD hydrolase [Aphanomyces astaci]	[R] KOG1618 Predicted phosphatase		GO:0016787//hydrolase activity
Unigene11180_All	2191	ko03013//RNA transport	Genetic Information Processing	Translation	-1.11343	2.49911e-15	7.60633e-16	K03243//translation initiation factor 5B+ko03013//RNA transport;K10406//kinesin family member C2/C3;K18626//trichohyalin	Ran-interacting Mog1 protein	AP015053.1 Vigna angularis var. angularis DNA, scaffold: Scaffold_0009, complete sequence, cultivar: Shumari	LOW QUALITY PROTEIN: cilia- and flagella-associated protein 251-like, partial [Chenopodium quinoa]	[A] KOG2548 SWAP mRNA splicing regulator		GO:0045735//nutrient reservoir activity
CL8527.Contig2_All	2168	ko03015//mRNA surveillance pathway;ko03013//RNA transport	Genetic Information Processing	Translation	-1.1157	0	0	K16628//collagen, type VII, alpha;K22020//mucin-19;K17987//next to BRCA1 gene 1 protein;K13171//serine/arginine repetitive matrix protein 1+ko03015//mRNA surveillance pathway+ko03013//RNA transport;K13171//serine/arginine repetitive matrix protein 1+ko03015//mRNA surveillance pathway+ko03013//RNA transport	ATP:guanido phosphotransferase, C-terminal catalytic domain	CT837280.1 Oryza sativa (indica cultivar-group) cDNA clone:OSIGCRA112N04, full insert sequence	hypothetical protein EMIHUDRAFT_77619, partial [Emiliania huxleyi CCMP1516] >EOD40815.1 hypothetical protein EMIHUDRAFT_77619, partial [Emiliania huxleyi CCMP1516]	[C] KOG3581 Creatine kinases		GO:0005524//ATP binding;GO:0016301//kinase activity
CL5762.Contig2_All	1341	ko03013//RNA transport	Genetic Information Processing	Translation	-1.11607	0.000300499	0.000212426	K14439//SWI/SNF-related matrix-associated actin-dependent regulator of chromatin subfamily A containing DEAD/H box 1 [EC:3.6.4.12];K14306//nuclear pore complex protein Nup62+ko03013//RNA transport	TOBE domain	XM_005827218.1 Guillardia theta CCMP2712 hypothetical protein (GUITHDRAFT_113538) mRNA, complete cds	Repetin [Symbiodinium microadriaticum]	[K] KOG1878 Nuclear receptor coregulator SMRT/SMRTER, contains Myb-like domains	Dynein assembly factor 3, axonemal homolog OS=Chlamydomonas reinhardtii GN=DAB1 PE=3 SV=1
Unigene41672_All	720	ko03015//mRNA surveillance pathway;ko03013//RNA transport	Genetic Information Processing	Translation	-1.1162	3.13327e-18	8.47775e-19	K16628//collagen, type VII, alpha;K22020//mucin-19;K13171//serine/arginine repetitive matrix protein 1+ko03015//mRNA surveillance pathway+ko03013//RNA transport;K14325//RNA-binding protein with serine-rich domain 1+ko03015//mRNA surveillance pathway+ko03013//RNA transport	zinc-finger of a C2HC-type		hypothetical protein GPECTOR_70g497 [Gonium pectorale]	[S] KOG3940 Uncharacterized conserved protein	Arabinogalactan protein 1 OS=Oryza sativa subsp. japonica GN=AGP1 PE=1 SV=1	GO:0003677//DNA binding;GO:0006281//DNA repair
Unigene396_All	1385	ko03013//RNA transport;ko03020//RNA polymerase;ko04075//Plant hormone signal transduction	Genetic Information Processing;Environmental Information Processing	Translation;Transcription;Signal transduction	-1.11687	0.000173209	0.000117821	K17987//next to BRCA1 gene 1 protein;K03006//DNA-directed RNA polymerase II subunit RPB1 [EC:2.7.7.6]+ko03020//RNA polymerase;K14486//auxin response factor+ko04075//Plant hormone signal transduction;K15168//mediator of RNA polymerase II transcription subunit 25;K14306//nuclear pore complex protein Nup62+ko03013//RNA transport	Calcineurin-like phosphoesterase		hypothetical protein AV274_3234 [Blastocystis sp. ATCC 50177/Nand II]	[T] LSE0513 C 7-transmembrane receptor	Gamma-gliadin OS=Triticum aestivum PE=3 SV=1
Unigene40930_All	2702	ko03015//mRNA surveillance pathway;ko03013//RNA transport	Genetic Information Processing	Translation	-1.11687	5.69099e-35	9.9099e-36	K22020//mucin-19;K14325//RNA-binding protein with serine-rich domain 1+ko03015//mRNA surveillance pathway+ko03013//RNA transport;K19719//collagen, type II, alpha			hypothetical protein BU14_0288s0030 [Porphyra umbilicalis]	[W] KOG3544 Collagens (type IV and type XIII), and related proteins
CL10299.Contig2_All	2346	ko03013//RNA transport;ko03015//mRNA surveillance pathway	Genetic Information Processing	Translation	-1.12022	1.12188e-28	2.23719e-29	K14325//RNA-binding protein with serine-rich domain 1+ko03015//mRNA surveillance pathway+ko03013//RNA transport;K14325//RNA-binding protein with serine-rich domain 1+ko03015//mRNA surveillance pathway+ko03013//RNA transport;K14325//RNA-binding protein with serine-rich domain 1+ko03015//mRNA surveillance pathway+ko03013//RNA transport;K14325//RNA-binding protein with serine-rich domain 1+ko03015//…	Astacin (Peptidase family M12A)		hypothetical protein AURANDRAFT_70520 [Aureococcus anophagefferens] >EGB12618.1 hypothetical protein AURANDRAFT_70520 [Aureococcus anophagefferens]	[O] KOG3714 Meprin A metalloprotease	Vegetative cell wall protein gp1 OS=Chlamydomonas reinhardtii GN=GP1 PE=1 SV=1	GO:0005509//calcium ion binding
Unigene7733_All	3115	ko03015//mRNA surveillance pathway;ko03013//RNA transport	Genetic Information Processing	Translation	-1.12334	0.000437773	0.000316775	K14325//RNA-binding protein with serine-rich domain 1+ko03015//mRNA surveillance pathway+ko03013//RNA transport;K14325//RNA-binding protein with serine-rich domain 1+ko03015//mRNA surveillance pathway+ko03013//RNA transport	Sulfotransferase family		predicted protein, partial [Phaeodactylum tricornutum CCAP 1055/1] >EEC47056.1 predicted protein, partial [Phaeodactylum tricornutum CCAP 1055/1]			GO:0016021//integral component of membrane
Unigene42328_All	382	ko03015//mRNA surveillance pathway;ko03013//RNA transport	Genetic Information Processing	Translation	-1.12404	5.161e-05	3.24292e-05	K02184//formin 2;K22020//mucin-19;K14325//RNA-binding protein with serine-rich domain 1+ko03015//mRNA surveillance pathway+ko03013//RNA transport			hypothetical protein BU14_0095s0027 [Porphyra umbilicalis]	[TZ] KOG3671 Actin regulatory protein (Wiskott-Aldrich syndrome protein)	Formin-like protein 13 OS=Arabidopsis thaliana GN=FH13 PE=2 SV=3
Unigene35477_All	1071	ko03013//RNA transport	Genetic Information Processing	Translation	-1.12751	0.000355969	0.000253944	K14306//nuclear pore complex protein Nup62+ko03013//RNA transport;K17987//next to BRCA1 gene 1 protein;K14306//nuclear pore complex protein Nup62+ko03013//RNA transport;K14306//nuclear pore complex protein Nup62+ko03013//RNA transport;K04733//interleukin-1 receptor-associated kinase 4 [EC:2.7.11.1]	Gram-negative porin		similar to hedgehog protein [Cyanidioschyzon merolae strain 10D] >BAM79403.1 similar to hedgehog protein [Cyanidioschyzon merolae strain 10D]	[T] LSE0513 C 7-transmembrane receptor	Proline-rich receptor-like protein kinase PERK8 OS=Arabidopsis thaliana GN=PERK8 PE=1 SV=1	GO:0016539//intein-mediated protein splicing;GO:0008233//peptidase activity
CL216.Contig1_All	1426	ko03013//RNA transport;ko03015//mRNA surveillance pathway	Genetic Information Processing	Translation	-1.12956	1.52444e-05	8.99661e-06	K10990//RecQ-mediated genome instability protein 1;K22020//mucin-19;K13171//serine/arginine repetitive matrix protein 1+ko03015//mRNA surveillance pathway+ko03013//RNA transport;K13171//serine/arginine repetitive matrix protein 1+ko03015//mRNA surveillance pathway+ko03013//RNA transport;K17987//next to BRCA1 gene 1 protein	Putative ephrin-receptor like		conserved unknown protein [Ectocarpus siliculosus]	[T] LSE0519 C GROUND domains (extracellular cysteine-containing domain sometimes associated with HOG domains)	Serine/arginine-rich splicing factor SR45 OS=Arabidopsis thaliana GN=SR45 PE=1 SV=1	GO:0016746//transferase activity, transferring acyl groups;GO:0008061//chitin binding;GO:0006030//chitin metabolic process;GO:0016021//integral component of membrane;GO:0005576//extracellular region
Unigene45824_All	455	ko03015//mRNA surveillance pathway;ko03013//RNA transport	Genetic Information Processing	Translation	-1.13016	3.15219e-06	1.72544e-06	K13171//serine/arginine repetitive matrix protein 1+ko03015//mRNA surveillance pathway+ko03013//RNA transport;K02184//formin 2;K13171//serine/arginine repetitive matrix protein 1+ko03015//mRNA surveillance pathway+ko03013//RNA transport;K13171//serine/arginine repetitive matrix protein 1+ko03015//mRNA surveillance pathway+ko03013//RNA transport	Putative cytokine, C6ORF120		serine/arginine repetitive matrix protein 1 isoform X1 [Sorghum bicolor] >KXG39705.1 hypothetical protein SORBI_3001G423700 [Sorghum bicolor] >OQU92852.1 hypothetical protein SORBI_3001G423700 [Sorghum bicolor]	[W] KOG3544 Collagens (type IV and type XIII), and related proteins	Serine/arginine-rich splicing factor SR45 OS=Arabidopsis thaliana GN=SR45 PE=1 SV=1
CL9522.Contig1_All	1100	ko03013//RNA transport;ko00940//Phenylpropanoid biosynthesis;ko03015//mRNA surveillance pathway;ko01100//Metabolic pathways;ko01110//Biosynthesis of secondary metabolites	Metabolism;Genetic Information Processing	Biosynthesis of other secondary metabolites;Global and overview maps;Translation	-1.13018	3.49908e-14	1.121e-14	K00430//peroxidase [EC:1.11.1.7]+ko01100//Metabolic pathways+ko01110//Biosynthesis of secondary metabolites+ko00940//Phenylpropanoid biosynthesis;K02184//formin 2;K13171//serine/arginine repetitive matrix protein 1+ko03015//mRNA surveillance pathway+ko03013//RNA transport;K22020//mucin-19			hypothetical protein BU14_0066s0031 [Porphyra umbilicalis]	[ZR] LSE0118 A Protein possibly involved in cytoskeleton rearrangements, contains FH domain	Formin-like protein 14 OS=Arabidopsis thaliana GN=FH14 PE=3 SV=3
Unigene29632_All	1040	ko03013//RNA transport;ko03015//mRNA surveillance pathway;ko01100//Metabolic pathways;ko00040//Pentose and glucuronate interconversions	Metabolism;Genetic Information Processing	Carbohydrate metabolism;Translation;Global and overview maps	-1.13202	3.77072e-06	2.08161e-06	K22020//mucin-19;K14325//RNA-binding protein with serine-rich domain 1+ko03015//mRNA surveillance pathway+ko03013//RNA transport;K14325//RNA-binding protein with serine-rich domain 1+ko03015//mRNA surveillance pathway+ko03013//RNA transport;K01051//pectinesterase [EC:3.1.1.11]+ko00040//Pentose and glucuronate interconversions+ko01100//Metabolic pathways;K19719//collagen, type II, alpha	mTERF		hypothetical protein BU14_0259s0006 [Porphyra umbilicalis]	[W] KOG3544 Collagens (type IV and type XIII), and related proteins
CL7992.Contig1_All	2278	ko03013//RNA transport	Genetic Information Processing	Translation	-1.13218	1.58857e-79	1.52241e-80	K03243//translation initiation factor 5B+ko03013//RNA transport;K03243//translation initiation factor 5B+ko03013//RNA transport;K03243//translation initiation factor 5B+ko03013//RNA transport	Elongation factor Tu GTP binding domain	XM_003055379.1 Micromonas pusilla CCMP1545 translation initiation factor, mRNA	EIF5B, eukaryotic translation initiation factor 5B [Ectocarpus siliculosus]	[J] KOG1144 Translation initiation factor 5B (eIF-5B)	Proline-rich receptor-like protein kinase PERK9 OS=Arabidopsis thaliana GN=PERK9 PE=1 SV=1
Unigene23372_All	807	ko03013//RNA transport;ko03015//mRNA surveillance pathway	Genetic Information Processing	Translation	-1.13394	2.15613e-18	5.80093e-19	K13171//serine/arginine repetitive matrix protein 1+ko03015//mRNA surveillance pathway+ko03013//RNA transport	SFI toxin family		hypothetical protein H632_c290p0, partial [Helicosporidium sp. ATCC 50920]	[AR] KOG2146 Splicing coactivator SRm160/300, subunit SRm160 (contains PWI domain)
CL7992.Contig2_All	1938	ko03013//RNA transport	Genetic Information Processing	Translation	-1.13509	1.21823e-05	7.11353e-06	K03243//translation initiation factor 5B+ko03013//RNA transport;K03243//translation initiation factor 5B+ko03013//RNA transport;K03243//translation initiation factor 5B+ko03013//RNA transport	Elongation factor Tu GTP binding domain	XM_003055379.1 Micromonas pusilla CCMP1545 translation initiation factor, mRNA	EIF5B, eukaryotic translation initiation factor 5B [Ectocarpus siliculosus]	[J] KOG1144 Translation initiation factor 5B (eIF-5B)	Proline-rich receptor-like protein kinase PERK9 OS=Arabidopsis thaliana GN=PERK9 PE=1 SV=1
CL229.Contig2_All	1148	ko03013//RNA transport	Genetic Information Processing	Translation	-1.13627	6.99349e-64	7.88517e-65	K22020//mucin-19;K14306//nuclear pore complex protein Nup62+ko03013//RNA transport;K01414//oligopeptidase A [EC:3.4.24.70];K14306//nuclear pore complex protein Nup62+ko03013//RNA transport	SDA1	HG975450.1 Solanum pennellii chromosome ch11, complete genome	LOW QUALITY PROTEIN: hypothetical protein BU14_0183s0035 [Porphyra umbilicalis]	[GO] KOG4157 beta-1,6-N-acetylglucosaminyltransferase, contains WSC domain	Protein FANTASTIC FOUR 1 OS=Arabidopsis thaliana GN=FAF1 PE=2 SV=1
Unigene44667_All	728	ko03013//RNA transport;ko03015//mRNA surveillance pathway	Genetic Information Processing	Translation	-1.13803	6.45778e-06	3.65616e-06	K14325//RNA-binding protein with serine-rich domain 1+ko03015//mRNA surveillance pathway+ko03013//RNA transport;K14325//RNA-binding protein with serine-rich domain 1+ko03015//mRNA surveillance pathway+ko03013//RNA transport;K14325//RNA-binding protein with serine-rich domain 1+ko03015//mRNA surveillance pathway+ko03013//RNA transport;K14325//RNA-binding protein with serine-rich domain 1+ko03015//…	PT repeat		hypothetical protein EMIHUDRAFT_433316 [Emiliania huxleyi CCMP1516] >EOD41329.1 hypothetical protein EMIHUDRAFT_433316 [Emiliania huxleyi CCMP1516]	[OW] KOG1565 Gelatinase A and related matrix metalloproteases	Vegetative cell wall protein gp1 OS=Chlamydomonas reinhardtii GN=GP1 PE=1 SV=1	GO:0008237//metallopeptidase activity
Unigene44587_All	1433	ko03013//RNA transport;ko03015//mRNA surveillance pathway	Genetic Information Processing	Translation	-1.13845	1.05088e-10	4.05362e-11	K14327//regulator of nonsense transcripts 2+ko03015//mRNA surveillance pathway+ko03013//RNA transport;K14327//regulator of nonsense transcripts 2+ko03015//mRNA surveillance pathway+ko03013//RNA transport;K14327//regulator of nonsense transcripts 2+ko03015//mRNA surveillance pathway+ko03013//RNA transport;K14327//regulator of nonsense transcripts 2+ko03015//mRNA surveillance pathway+ko03013//RNA t…	MIF4G domain		putative hUPF2 [Ectocarpus siliculosus]	[A] KOG2051 Nonsense-mediated mRNA decay 2 protein	Formin-like protein 16 OS=Oryza sativa subsp. japonica GN=FH16 PE=2 SV=1	GO:0003723//RNA binding;GO:0000184//nuclear-transcribed mRNA catabolic process, nonsense-mediated decay;GO:0035145//exon-exon junction complex;GO:0005737//cytoplasm;GO:0005844//polysome
Unigene18579_All	1057	ko03015//mRNA surveillance pathway;ko03013//RNA transport	Genetic Information Processing	Translation	-1.14403	7.19074e-09	3.12574e-09	K14325//RNA-binding protein with serine-rich domain 1+ko03015//mRNA surveillance pathway+ko03013//RNA transport;K14325//RNA-binding protein with serine-rich domain 1+ko03015//mRNA surveillance pathway+ko03013//RNA transport;K13171//serine/arginine repetitive matrix protein 1+ko03015//mRNA surveillance pathway+ko03013//RNA transport;K14325//RNA-binding protein with serine-rich domain 1+ko03015//mR…	PWWP domain		hypothetical protein BU14_0504s0008 [Porphyra umbilicalis]	[AR] KOG2146 Splicing coactivator SRm160/300, subunit SRm160 (contains PWI domain)	Oleosin-B6 OS=Brassica napus GN=OlnB6 PE=1 SV=3	GO:0005509//calcium ion binding
Unigene43033_All	658	ko03013//RNA transport;ko03015//mRNA surveillance pathway	Genetic Information Processing	Translation	-1.14544	0.000876762	0.000666152	K22020//mucin-19;K19719//collagen, type II, alpha;K02184//formin 2;K14325//RNA-binding protein with serine-rich domain 1+ko03015//mRNA surveillance pathway+ko03013//RNA transport;K14325//RNA-binding protein with serine-rich domain 1+ko03015//mRNA surveillance pathway+ko03013//RNA transport			conserved unknown protein [Ectocarpus siliculosus]	[K] KOG2341 TATA box binding protein (TBP)-associated factor, RNA polymerase II	Formin-like protein 18 OS=Oryza sativa subsp. japonica GN=FH18 PE=2 SV=1
Unigene33721_All	1022	ko03013//RNA transport;ko03015//mRNA surveillance pathway	Genetic Information Processing	Translation	-1.14605	5.26294e-10	2.11754e-10	K22020//mucin-19;K16628//collagen, type VII, alpha;K13171//serine/arginine repetitive matrix protein 1+ko03015//mRNA surveillance pathway+ko03013//RNA transport;K14325//RNA-binding protein with serine-rich domain 1+ko03015//mRNA surveillance pathway+ko03013//RNA transport;K13171//serine/arginine repetitive matrix protein 1+ko03015//mRNA surveillance pathway+ko03013//RNA transport	Protein kinase domain		hornerin-like, partial [Zea mays]	[B] KOG2510 SWI-SNF chromatin-remodeling complex protein	Formin-like protein 16 OS=Oryza sativa subsp. japonica GN=FH16 PE=2 SV=1	GO:0005509//calcium ion binding
Unigene46217_All	1320	ko03013//RNA transport;ko03015//mRNA surveillance pathway	Genetic Information Processing	Translation	-1.14852	1.12591e-116	8.19512e-118	K02184//formin 2;K02184//formin 2;K02184//formin 2;K14325//RNA-binding protein with serine-rich domain 1+ko03015//mRNA surveillance pathway+ko03013//RNA transport;K22020//mucin-19	ATP-grasp domain		hypothetical protein H310_04645 [Aphanomyces invadans] >ETW04352.1 hypothetical protein H310_04645 [Aphanomyces invadans]	[A] KOG1869 Splicing coactivator SRm160/300, subunit SRm300	Oleosin-B6 OS=Brassica napus GN=OlnB6 PE=1 SV=3	GO:0046872//metal ion binding;GO:0005524//ATP binding;GO:0003824//catalytic activity
Unigene33740_All	796	ko03013//RNA transport	Genetic Information Processing	Translation	-1.14866	1.86115e-10	7.2828e-11	K02184//formin 2;K14306//nuclear pore complex protein Nup62+ko03013//RNA transport;K02184//formin 2	SGT1 protein		hypothetical protein Csa_2G354810 [Cucumis sativus]	[GO] KOG4157 beta-1,6-N-acetylglucosaminyltransferase, contains WSC domain	Mulatexin OS=Morus alba PE=1 SV=2
CL2501.Contig3_All	3109	ko03013//RNA transport;ko03015//mRNA surveillance pathway	Genetic Information Processing	Translation	-1.14963	1.34226e-84	1.23426e-85	K14325//RNA-binding protein with serine-rich domain 1+ko03015//mRNA surveillance pathway+ko03013//RNA transport;K14325//RNA-binding protein with serine-rich domain 1+ko03015//mRNA surveillance pathway+ko03013//RNA transport;K01180//endo-1,3(4)-beta-glucanase [EC:3.2.1.6]			hypothetical protein BU14_0066s0031 [Porphyra umbilicalis]	[ZR] LSE0118 A Protein possibly involved in cytoskeleton rearrangements, contains FH domain	Sulfated surface glycoprotein 185 OS=Volvox carteri PE=1 SV=1
CL2248.Contig3_All	1157	ko03015//mRNA surveillance pathway;ko03013//RNA transport	Genetic Information Processing	Translation	-1.15016	7.7319e-12	2.7856e-12	K02184//formin 2;K13171//serine/arginine repetitive matrix protein 1+ko03015//mRNA surveillance pathway+ko03013//RNA transport;K14325//RNA-binding protein with serine-rich domain 1+ko03015//mRNA surveillance pathway+ko03013//RNA transport;K02184//formin 2;K14325//RNA-binding protein with serine-rich domain 1+ko03015//mRNA surveillance pathway+ko03013//RNA transport			putative cytochrome P450 superfamily protein isoform X4 [Zea mays]	[R] KOG0118 FOG: RRM domain	Serine/arginine-rich splicing factor SR45 OS=Arabidopsis thaliana GN=SR45 PE=1 SV=1
CL575.Contig3_All	1866	ko03015//mRNA surveillance pathway;ko03013//RNA transport	Genetic Information Processing	Translation	-1.15349	1.64912e-14	5.20104e-15	K13171//serine/arginine repetitive matrix protein 1+ko03015//mRNA surveillance pathway+ko03013//RNA transport;K13171//serine/arginine repetitive matrix protein 1+ko03015//mRNA surveillance pathway+ko03013//RNA transport		XM_002958197.1 Volvox carteri f. nagariensis hypothetical protein, mRNA	hornerin-like, partial [Zea mays]	[R] KOG0118 FOG: RRM domain	Serine/arginine-rich splicing factor SR45 OS=Arabidopsis thaliana GN=SR45 PE=1 SV=1
Unigene37575_All	1719	ko03015//mRNA surveillance pathway;ko03013//RNA transport	Genetic Information Processing	Translation	-1.15921	7.78732e-10	3.16658e-10	K16628//collagen, type VII, alpha;K02184//formin 2;K02184//formin 2;K22020//mucin-19;K14325//RNA-binding protein with serine-rich domain 1+ko03015//mRNA surveillance pathway+ko03013//RNA transport	Immune inhibitor A peptidase M6		predicted protein [Thalassiosira pseudonana CCMP1335] >ACI64840.1 predicted protein [Thalassiosira pseudonana CCMP1335]	[T] KOG1164 Casein kinase (serine/threonine/tyrosine protein kinase)	Leucine-rich repeat extensin-like protein 5 OS=Arabidopsis thaliana GN=LRX5 PE=2 SV=2	GO:0008237//metallopeptidase activity
CL3792.Contig1_All	703	ko03013//RNA transport	Genetic Information Processing	Translation	-1.16039	0.000356266	0.00025417	K22614//NLR family CARD domain-containing protein 3;K14319//Ran GTPase-activating protein 1+ko03013//RNA transport;K14319//Ran GTPase-activating protein 1+ko03013//RNA transport;K14319//Ran GTPase-activating protein 1+ko03013//RNA transport	Leucine Rich repeat	XR_002303943.1 PREDICTED: Dendrobium catenatum uncharacterized LOC110103385 (LOC110103385), transcript variant X2, ncRNA	hypothetical protein ZOSMA_30G00530, partial [Zostera marina]	[A] KOG4849 mRNA cleavage factor I subunit/CPSF subunit	Sulfated surface glycoprotein 185 OS=Volvox carteri PE=1 SV=1
CL9102.Contig1_All	1042	ko03015//mRNA surveillance pathway;ko03013//RNA transport;ko04016//MAPK signaling pathway - plant;ko00520//Amino sugar and nucleotide sugar metabolism;ko01100//Metabolic pathways	Genetic Information Processing;Metabolism;Environmental Information Processing	Signal transduction;Translation;Global and overview maps;Carbohydrate metabolism	-1.16089	4.85132e-09	2.08355e-09	K20547//basic endochitinase B [EC:3.2.1.14]+ko04016//MAPK signaling pathway - plant+ko00520//Amino sugar and nucleotide sugar metabolism+ko01100//Metabolic pathways;K02184//formin 2;K14325//RNA-binding protein with serine-rich domain 1+ko03015//mRNA surveillance pathway+ko03013//RNA transport			LOW QUALITY PROTEIN: hypothetical protein BU14_1244s0001, partial [Porphyra umbilicalis]	[K] KOG2341 TATA box binding protein (TBP)-associated factor, RNA polymerase II	Formin-like protein 16 OS=Oryza sativa subsp. japonica GN=FH16 PE=2 SV=1
[truncated: 688 more rows]

## Sheet: mRNA survilance
Supplementary Table 6:	Differentially expressed genes involved in mRNA survilance metabolism
Gene ID	Length	Pathway Name	Level 1	Level 2	log2(He_1000/He_400)	Qvalue(He_400-vs-He_1000)	Pvalue(He_400-vs-He_1000)	Kegg Orthology	Pfam	Nt	Nr	Kog	Swissprot	GO
[truncated: 694 more rows]

## Sheet: Spiceliosome
Supplementary Table 6:	Differentially expressed genes involved in spiceliosome metabolism
[truncated: 274 more rows]
