# Supplementary material for: Ocean warming and acidification affect the transitional element and macromolecular accumulation in harmful raphidophyte Heterosigma akashiwo
Source: Research Square preprint supplement (doi:10.21203/rs.3.rs-2173912/v1), 2022-11-03
Supplement: Supplementary file 4 [file 8f86dd2d77e4422ac99ffc55.xlsx]

## Sheet: Photosynthesis
Supplementary Table 2:	Differentially expressed genes involved in photosynthesis metabolism
Gene ID	Length	Pathway Name	Level 1	Level 2	log2(He_1000/He_400)	Qvalue(He_400-vs-He_1000)	Pvalue(He_400-vs-He_1000)	Kegg Orthology	Pfam	Nt	Nr	Kog	Swissprot	GO
Unigene23415_All	935	ko01100//Metabolic pathways;ko00195//Photosynthesis	Metabolism	Global and overview maps;Energy metabolism	2.57604	0	0	K02719//photosystem II PsbU protein+ko01100//Metabolic pathways+ko00195//Photosynthesis;K02719//photosystem II PsbU protein+ko01100//Metabolic pathways+ko00195//Photosynthesis	Photosystem II 12 kDa extrinsic protein (PsbU)		predicted protein [Thalassiosira pseudonana CCMP1335] >EED92635.1 predicted protein [Thalassiosira pseudonana CCMP1335]		Photosystem II 12 kDa extrinsic protein, chloroplastic OS=Griffithsia japonica GN=psbU PE=2 SV=1	GO:0042549//photosystem II stabilization;GO:0019898//extrinsic component of membrane;GO:0015979//photosynthesis;GO:0009654//photosystem II oxygen evolving complex
Unigene46913_All	723	ko00195//Photosynthesis;ko01100//Metabolic pathways	Metabolism	Energy metabolism;Global and overview maps	2.50992	9.15915e-11	3.51975e-11	K02719//photosystem II PsbU protein+ko01100//Metabolic pathways+ko00195//Photosynthesis;K02719//photosystem II PsbU protein+ko01100//Metabolic pathways+ko00195//Photosynthesis;K02719//photosystem II PsbU protein+ko01100//Metabolic pathways+ko00195//Photosynthesis	Photosystem II 12 kDa extrinsic protein (PsbU)		predicted protein [Thalassiosira pseudonana CCMP1335] >EED95468.1 predicted protein [Thalassiosira pseudonana CCMP1335]	[T] KOG1187 Serine/threonine protein kinase	Photosystem II 12 kDa extrinsic protein, chloroplastic OS=Griffithsia japonica GN=psbU PE=2 SV=1	GO:0042549//photosystem II stabilization;GO:0019898//extrinsic component of membrane;GO:0015979//photosynthesis;GO:0009654//photosystem II oxygen evolving complex
Unigene28869_All	523	ko00195//Photosynthesis	Metabolism	Energy metabolism	2.28752	0.000255149	0.00017752	K02639//ferredoxin+ko00195//Photosynthesis;K02639//ferredoxin+ko00195//Photosynthesis;K02639//ferredoxin+ko00195//Photosynthesis	2Fe-2S iron-sulfur cluster binding domain		ferredoxin (plastid) [Bangia fuscopurpurea]		Ferredoxin OS=Thalassiosira weissflogii GN=petF PE=3 SV=3	GO:0009055//electron transfer activity;GO:0022900//electron transport chain;GO:0046872//metal ion binding;GO:0051537//2 iron, 2 sulfur cluster binding;GO:0009507//chloroplast
Unigene47225_All	1083	ko00190//Oxidative phosphorylation;ko00195//Photosynthesis;ko01100//Metabolic pathways	Metabolism	Energy metabolism;Global and overview maps	2.07412	1.05275e-08	4.627e-09	K02115//F-type H+-transporting ATPase subunit gamma+ko01100//Metabolic pathways+ko00190//Oxidative phosphorylation+ko00195//Photosynthesis;K02115//F-type H+-transporting ATPase subunit gamma+ko01100//Metabolic pathways+ko00190//Oxidative phosphorylation+ko00195//Photosynthesis;K02115//F-type H+-transporting ATPase subunit gamma+ko01100//Metabolic pathways+ko00190//Oxidative phosphorylation+ko0019…	ATP synthase		ATP synthase [Thalassiosira pseudonana CCMP1335] >EED92675.1 ATP synthase [Thalassiosira pseudonana CCMP1335]	[C] KOG1531 F0F1-type ATP synthase, gamma subunit	ATP synthase gamma chain, chloroplastic OS=Odontella sinensis GN=ATPC PE=1 SV=1	GO:0015986//ATP synthesis coupled proton transport;GO:0045261//proton-transporting ATP synthase complex, catalytic core F(1);GO:0046933//proton-transporting ATP synthase activity, rotational mechanism
CL11139.Contig2_All	1467	ko00195//Photosynthesis;ko01100//Metabolic pathways	Metabolism	Global and overview maps;Energy metabolism	2.04242	8.88077e-31	1.68968e-31	K02641//ferredoxin--NADP+ reductase [EC:1.18.1.2]+ko01100//Metabolic pathways+ko00195//Photosynthesis;K02641//ferredoxin--NADP+ reductase [EC:1.18.1.2]+ko01100//Metabolic pathways+ko00195//Photosynthesis;K02641//ferredoxin--NADP+ reductase [EC:1.18.1.2]+ko01100//Metabolic pathways+ko00195//Photosynthesis;K02641//ferredoxin--NADP+ reductase [EC:1.18.1.2]+ko01100//Metabolic pathways+ko00195//Photos…	Oxidoreductase NAD-binding domain		Ferredoxin reductase-type FAD-binding domain protein [Nannochloropsis gaditana]	[C] KOG1158 NADP/FAD dependent oxidoreductase	Ferredoxin--NADP reductase, embryo isozyme, chloroplastic OS=Oryza sativa subsp. japonica GN=Os07g0147900 PE=1 SV=1	GO:0004324//ferredoxin-NADP+ reductase activity
Unigene28323_All	479	ko00195//Photosynthesis	Metabolism	Energy metabolism	1.84006	2.53339e-05	1.53698e-05	K08906//cytochrome c6+ko00195//Photosynthesis;K08906//cytochrome c6+ko00195//Photosynthesis;K08906//cytochrome c6+ko00195//Photosynthesis;K08906//cytochrome c6+ko00195//Photosynthesis	Cytochrome C oxidase, cbb3-type, subunit III	XM_002291938.1 Thalassiosira pseudonana CCMP1335 hypothetical protein partial mRNA	hypothetical protein THAPSDRAFT_35934 [Thalassiosira pseudonana CCMP1335] >EED90825.1 hypothetical protein THAPSDRAFT_35934 [Thalassiosira pseudonana CCMP1335]		Cytochrome c6 OS=Bumilleriopsis filiformis GN=petJ PE=1 SV=1	GO:0009055//electron transfer activity;GO:0020037//heme binding;GO:0005506//iron ion binding
Unigene20366_All	908	ko01100//Metabolic pathways;ko00195//Photosynthesis	Metabolism	Energy metabolism;Global and overview maps	1.68996	1.75372e-07	8.50996e-08	K08901//photosystem II oxygen-evolving enhancer protein 3+ko01100//Metabolic pathways+ko00195//Photosynthesis	Oxygen evolving enhancer protein 3 (PsbQ)	XM_002286535.1 Thalassiosira pseudonana CCMP1335 predicted protein partial mRNA	predicted protein [Thalassiosira pseudonana CCMP1335] >EED96212.1 predicted protein [Thalassiosira pseudonana CCMP1335]
Unigene16441_All	772	ko01100//Metabolic pathways;ko00195//Photosynthesis	Metabolism	Global and overview maps;Energy metabolism	1.48916	5.72045e-06	3.22099e-06	K02636//cytochrome b6-f complex iron-sulfur subunit [EC:7.1.1.6]+ko01100//Metabolic pathways+ko00195//Photosynthesis;K02636//cytochrome b6-f complex iron-sulfur subunit [EC:7.1.1.6]+ko01100//Metabolic pathways+ko00195//Photosynthesis;K02636//cytochrome b6-f complex iron-sulfur subunit [EC:7.1.1.6]+ko01100//Metabolic pathways+ko00195//Photosynthesis;K02636//cytochrome b6-f complex iron-sulfur subu…	Cytochrome B6-F complex Fe-S subunit	XM_002287452.1 Thalassiosira pseudonana CCMP1335 predicted protein partial mRNA	predicted protein [Thalassiosira pseudonana CCMP1335] >EED94931.1 predicted protein [Thalassiosira pseudonana CCMP1335]	[C] KOG1671 Ubiquinol cytochrome c reductase, subunit RIP1	Cytochrome b6-f complex iron-sulfur subunit 1, cyanelle OS=Cyanophora paradoxa GN=petC-1 PE=2 SV=1	GO:0009496//plastoquinol--plastocyanin reductase activity;GO:0045158//electron transporter, transferring electrons within cytochrome b6/f complex of photosystem II activity;GO:0051537//2 iron, 2 sulfur cluster binding;GO:0016021//integral component of membrane;GO:0015979//photosynthesis;GO:0042651//thylakoid membrane
Unigene29867_All	1106	ko00195//Photosynthesis;ko01100//Metabolic pathways	Metabolism	Global and overview maps;Energy metabolism	1.47256	6.88377e-05	4.40905e-05	K02716//photosystem II oxygen-evolving enhancer protein 1+ko01100//Metabolic pathways+ko00195//Photosynthesis;K02716//photosystem II oxygen-evolving enhancer protein 1+ko01100//Metabolic pathways+ko00195//Photosynthesis;K02716//photosystem II oxygen-evolving enhancer protein 1+ko01100//Metabolic pathways+ko00195//Photosynthesis;K02716//photosystem II oxygen-evolving enhancer protein 1+ko01100//Me…	Manganese-stabilising protein / photosystem II polypeptide	XM_002291189.1 Thalassiosira pseudonana CCMP1335 oxygen-evolving enhancer protein 1 precursor (PsbO), mRNA	oxygen-evolving enhancer protein 1 precursor [Thalassiosira pseudonana CCMP1335] >EED91332.1 oxygen-evolving enhancer protein 1 precursor [Thalassiosira pseudonana CCMP1335]		Oxygen-evolving enhancer protein 1, chloroplastic OS=Volvox carteri GN=PSBO PE=2 SV=1	GO:0042549//photosystem II stabilization;GO:0005509//calcium ion binding;GO:0019898//extrinsic component of membrane;GO:0016021//integral component of membrane;GO:0015979//photosynthesis;GO:0009654//photosystem II oxygen evolving complex
CL10481.Contig2_All	1460	ko00195//Photosynthesis;ko01100//Metabolic pathways	Metabolism	Energy metabolism;Global and overview maps	1.40979	0	0	K02719//photosystem II PsbU protein+ko01100//Metabolic pathways+ko00195//Photosynthesis;K02719//photosystem II PsbU protein+ko01100//Metabolic pathways+ko00195//Photosynthesis;K02719//photosystem II PsbU protein+ko01100//Metabolic pathways+ko00195//Photosynthesis	Photosystem II 12 kDa extrinsic protein (PsbU)		photosystem II PsbU protein [Fistulifera solaris]		Photosystem II 12 kDa extrinsic protein, chloroplastic OS=Griffithsia japonica GN=psbU PE=2 SV=1	GO:0042549//photosystem II stabilization;GO:0019898//extrinsic component of membrane;GO:0015979//photosynthesis;GO:0009654//photosystem II oxygen evolving complex
CL10481.Contig1_All	867	ko01100//Metabolic pathways;ko00195//Photosynthesis	Metabolism	Global and overview maps;Energy metabolism	1.39664	0	0	K02719//photosystem II PsbU protein+ko01100//Metabolic pathways+ko00195//Photosynthesis;K02719//photosystem II PsbU protein+ko01100//Metabolic pathways+ko00195//Photosynthesis;K02719//photosystem II PsbU protein+ko01100//Metabolic pathways+ko00195//Photosynthesis	Photosystem II 12 kDa extrinsic protein (PsbU)		photosystem II PsbU protein [Fistulifera solaris]		Photosystem II 12 kDa extrinsic protein, chloroplastic OS=Griffithsia japonica GN=psbU PE=2 SV=1	GO:0042549//photosystem II stabilization;GO:0019898//extrinsic component of membrane;GO:0015979//photosynthesis;GO:0009654//photosystem II oxygen evolving complex
Unigene42666_All	1219	ko00195//Photosynthesis;ko01100//Metabolic pathways	Metabolism	Global and overview maps;Energy metabolism	1.39302	7.2132e-11	2.75366e-11	K02641//ferredoxin--NADP+ reductase [EC:1.18.1.2]+ko01100//Metabolic pathways+ko00195//Photosynthesis;K02641//ferredoxin--NADP+ reductase [EC:1.18.1.2]+ko01100//Metabolic pathways+ko00195//Photosynthesis;K02641//ferredoxin--NADP+ reductase [EC:1.18.1.2]+ko01100//Metabolic pathways+ko00195//Photosynthesis;K02641//ferredoxin--NADP+ reductase [EC:1.18.1.2]+ko01100//Metabolic pathways+ko00195//Photos…	Oxidoreductase NAD-binding domain	XM_002295285.1 Thalassiosira pseudonana CCMP1335 ferredoxin-nadp reductase partial mRNA	ferredoxin-nadp reductase [Thalassiosira pseudonana CCMP1335] >EED87387.1 ferredoxin-nadp reductase [Thalassiosira pseudonana CCMP1335]	[C] KOG1158 NADP/FAD dependent oxidoreductase	Ferredoxin--NADP reductase, embryo isozyme, chloroplastic OS=Oryza sativa subsp. japonica GN=Os07g0147900 PE=1 SV=1	GO:0004324//ferredoxin-NADP+ reductase activity
CL4389.Contig1_All	1486	ko01100//Metabolic pathways;ko00195//Photosynthesis	Metabolism	Global and overview maps;Energy metabolism	1.20602	0	0	K08902//photosystem II Psb27 protein+ko01100//Metabolic pathways+ko00195//Photosynthesis;K08902//photosystem II Psb27 protein+ko01100//Metabolic pathways+ko00195//Photosynthesis;K08902//photosystem II Psb27 protein+ko01100//Metabolic pathways+ko00195//Photosynthesis	Photosystem II Pbs27		hypothetical protein AURANDRAFT_7494, partial [Aureococcus anophagefferens] >EGB06728.1 hypothetical protein AURANDRAFT_7494, partial [Aureococcus anophagefferens]		Photosystem II repair protein PSB27-H1, chloroplastic OS=Arabidopsis thaliana GN=PSB27-1 PE=1 SV=1	GO:0010207//photosystem II assembly
Unigene22033_All	2556	ko00195//Photosynthesis;ko01100//Metabolic pathways	Metabolism	Global and overview maps;Energy metabolism	1.18944	0	0	K02692//photosystem I subunit II+ko01100//Metabolic pathways+ko00195//Photosynthesis;K02692//photosystem I subunit II+ko01100//Metabolic pathways+ko00195//Photosynthesis;K02692//photosystem I subunit II+ko01100//Metabolic pathways+ko00195//Photosynthesis;K02692//photosystem I subunit II+ko01100//Metabolic pathways+ko00195//Photosynthesis;K02692//photosystem I subunit II+ko01100//Metabolic pathway…	PsaD	LC269922.1 Heterosigma akashiwo chloroplast DNA, complete genome, isolate: CCMP3374	photosystem I assembly protein Ycf3 (chloroplast) [Heterosigma akashiwo] >BBA18307.1 photosystem I assembly protein Ycf3 (chloroplast) [Heterosigma akashiwo] >BBA18446.1 photosystem I assembly protein Ycf3 (chloroplast) [Heterosigma akashiwo] >BBA18584.1 photosystem I assembly protein Ycf3 (chloroplast) [Heterosigma akashiwo] >BBA18723.1 photosystem I assembly protein Ycf3 (chloroplast) [Heterosi…	[J] KOG1741 Mitochondrial/chloroplast ribosomal protein S14/S29	Photosystem I reaction center subunit II OS=Odontella sinensis GN=psaD PE=3 SV=1	GO:0016021//integral component of membrane;GO:0009538//photosystem I reaction center;GO:0015979//photosynthesis;GO:0009507//chloroplast
CL4389.Contig2_All	1474	ko00195//Photosynthesis;ko01100//Metabolic pathways	Metabolism	Global and overview maps;Energy metabolism	1.0936	0	0	K08902//photosystem II Psb27 protein+ko01100//Metabolic pathways+ko00195//Photosynthesis;K08902//photosystem II Psb27 protein+ko01100//Metabolic pathways+ko00195//Photosynthesis;K08902//photosystem II Psb27 protein+ko01100//Metabolic pathways+ko00195//Photosynthesis	Photosystem II Pbs27		hypothetical protein AURANDRAFT_7494, partial [Aureococcus anophagefferens] >EGB06728.1 hypothetical protein AURANDRAFT_7494, partial [Aureococcus anophagefferens]		Photosystem II repair protein PSB27-H1, chloroplastic OS=Arabidopsis thaliana GN=PSB27-1 PE=1 SV=1	GO:0010207//photosystem II assembly
CL11139.Contig1_All	1546	ko00195//Photosynthesis;ko01100//Metabolic pathways	Metabolism	Energy metabolism;Global and overview maps	1.08032	4.77512e-109	3.65429e-110	K02641//ferredoxin--NADP+ reductase [EC:1.18.1.2]+ko01100//Metabolic pathways+ko00195//Photosynthesis;K02641//ferredoxin--NADP+ reductase [EC:1.18.1.2]+ko01100//Metabolic pathways+ko00195//Photosynthesis;K02641//ferredoxin--NADP+ reductase [EC:1.18.1.2]+ko01100//Metabolic pathways+ko00195//Photosynthesis;K02641//ferredoxin--NADP+ reductase [EC:1.18.1.2]+ko01100//Metabolic pathways+ko00195//Photos…	Oxidoreductase NAD-binding domain		hypothetical protein THAOC_06509 [Thalassiosira oceanica]	[C] KOG1158 NADP/FAD dependent oxidoreductase	Ferredoxin--NADP reductase, root isozyme, chloroplastic OS=Oryza sativa subsp. japonica GN=Os03g0784700 PE=1 SV=1	GO:0004324//ferredoxin-NADP+ reductase activity
Unigene42180_All	1155	ko00195//Photosynthesis	Metabolism	Energy metabolism	1.0018	1.22131e-138	7.90208e-140	K02639//ferredoxin+ko00195//Photosynthesis;K02639//ferredoxin+ko00195//Photosynthesis;K02639//ferredoxin+ko00195//Photosynthesis;K02639//ferredoxin+ko00195//Photosynthesis	2Fe-2S iron-sulfur cluster binding domain		hypothetical protein BU14_0238s0022 [Porphyra umbilicalis]	[C] KOG0557 Dihydrolipoamide acetyltransferase	Myrosinase-binding protein 2 OS=Arabidopsis thaliana GN=F-ATMBP PE=2 SV=1
Unigene44700_All	1690	ko00520//Amino sugar and nucleotide sugar metabolism;ko00195//Photosynthesis	Metabolism	Energy metabolism;Carbohydrate metabolism	-1.02191	1.03432e-05	5.9941e-06	K02639//ferredoxin+ko00195//Photosynthesis;K02639//ferredoxin+ko00195//Photosynthesis;K02639//ferredoxin+ko00195//Photosynthesis;K00326//cytochrome-b5 reductase [EC:1.6.2.2]+ko00520//Amino sugar and nucleotide sugar metabolism	Glycosyltransferase family 9 (heptosyltransferase)		hypothetical protein LR48_Vigan09g273900 [Vigna angularis]	[HC] KOG0534 NADH-cytochrome b-5 reductase	Ferredoxin OS=Gleichenia japonica PE=1 SV=1	GO:0009055//electron transfer activity;GO:0051536//iron-sulfur cluster binding;GO:0016491//oxidoreductase activity;GO:0004128//cytochrome-b5 reductase activity, acting on NAD(P)H
CL106.Contig48_All	3073	ko01100//Metabolic pathways;ko00190//Oxidative phosphorylation;ko00195//Photosynthesis	Metabolism	Energy metabolism;Global and overview maps	-1.06699	6.58583e-103	5.27708e-104	K02108//F-type H+-transporting ATPase subunit a+ko01100//Metabolic pathways+ko00190//Oxidative phosphorylation+ko00195//Photosynthesis		HG670306.1 Triticum aestivum chromosome 3B, genomic scaffold, cultivar Chinese Spring	cell wall-associated hydrolase, partial [Phaeodactylum tricornutum]		Uncharacterized protein ORF91 OS=Phalaenopsis aphrodite subsp. formosana PE=4 SV=1
CL11139.Contig3_All	1678	ko01100//Metabolic pathways;ko00195//Photosynthesis	Metabolism	Global and overview maps;Energy metabolism	-1.14739	7.3343e-06	4.17402e-06	K02641//ferredoxin--NADP+ reductase [EC:1.18.1.2]+ko01100//Metabolic pathways+ko00195//Photosynthesis;K02641//ferredoxin--NADP+ reductase [EC:1.18.1.2]+ko01100//Metabolic pathways+ko00195//Photosynthesis;K02641//ferredoxin--NADP+ reductase [EC:1.18.1.2]+ko01100//Metabolic pathways+ko00195//Photosynthesis;K02641//ferredoxin--NADP+ reductase [EC:1.18.1.2]+ko01100//Metabolic pathways+ko00195//Photos…	Oxidoreductase NAD-binding domain		Ferredoxin reductase-type FAD-binding domain protein [Nannochloropsis gaditana]	[C] KOG1158 NADP/FAD dependent oxidoreductase	Ferredoxin--NADP reductase, embryo isozyme, chloroplastic OS=Oryza sativa subsp. japonica GN=Os07g0147900 PE=1 SV=1	GO:0004324//ferredoxin-NADP+ reductase activity
Unigene37102_All	5158	ko01100//Metabolic pathways;ko00190//Oxidative phosphorylation;ko00195//Photosynthesis	Metabolism	Global and overview maps;Energy metabolism	-1.17038	7.48476e-110	5.68426e-111	K02111//F-type H+/Na+-transporting ATPase subunit alpha [EC:7.1.2.2 7.2.2.1]+ko01100//Metabolic pathways+ko00190//Oxidative phosphorylation+ko00195//Photosynthesis;K02132//F-type H+-transporting ATPase subunit alpha+ko01100//Metabolic pathways+ko00190//Oxidative phosphorylation;K02132//F-type H+-transporting ATPase subunit alpha+ko01100//Metabolic pathways+ko00190//Oxidative phosphorylation;K0213…	ATP synthase	MF083689.2 Chlamydomonas reinhardtii strain CC-2359 lts1-30 mt- chloroplast, complete genome	hypothetical protein SOVF_209290, partial [Spinacia oleracea]	[C] KOG1353 F0F1-type ATP synthase, alpha subunit	ATP synthase subunit alpha, chloroplastic OS=Rhodomonas salina GN=atpA PE=3 SV=1	GO:0015986//ATP synthesis coupled proton transport;GO:0045261//proton-transporting ATP synthase complex, catalytic core F(1);GO:0005524//ATP binding;GO:0045263//proton-transporting ATP synthase complex, coupling factor F(o);GO:0016021//integral component of membrane;GO:0046933//proton-transporting ATP synthase activity, rotational mechanism
CL106.Contig45_All	1603	ko00195//Photosynthesis;ko01100//Metabolic pathways;ko00190//Oxidative phosphorylation	Metabolism	Global and overview maps;Energy metabolism	-1.1849	0.000189401	0.000129479	K02108//F-type H+-transporting ATPase subunit a+ko01100//Metabolic pathways+ko00190//Oxidative phosphorylation+ko00195//Photosynthesis		LC269924.1 Heterosigma akashiwo chloroplast DNA, complete genome, isolate: CCMP1596	hypothetical protein BVRB_041110, partial [Beta vulgaris subsp. vulgaris]		Uncharacterized protein ORF91 OS=Phalaenopsis aphrodite subsp. formosana PE=4 SV=1
CL106.Contig5_All	3900	ko00195//Photosynthesis;ko01100//Metabolic pathways;ko00190//Oxidative phosphorylation	Metabolism	Energy metabolism;Global and overview maps	-1.18674	7.70024e-84	7.12094e-85	K02108//F-type H+-transporting ATPase subunit a+ko01100//Metabolic pathways+ko00190//Oxidative phosphorylation+ko00195//Photosynthesis;K01358//ATP-dependent Clp protease, protease subunit [EC:3.4.21.92]		LC269924.1 Heterosigma akashiwo chloroplast DNA, complete genome, isolate: CCMP1596	hypothetical protein CH29B_p069 (chloroplast) [Chlorella sp. ArM0029B]		Uncharacterized protein ORF91 OS=Phalaenopsis aphrodite subsp. formosana PE=4 SV=1
CL106.Contig39_All	2649	ko00190//Oxidative phosphorylation;ko01100//Metabolic pathways;ko00195//Photosynthesis	Metabolism	Energy metabolism;Global and overview maps	-1.38031	2.99697e-244	1.22843e-245	K02108//F-type H+-transporting ATPase subunit a+ko01100//Metabolic pathways+ko00190//Oxidative phosphorylation+ko00195//Photosynthesis;K01358//ATP-dependent Clp protease, protease subunit [EC:3.4.21.92]		HG670306.1 Triticum aestivum chromosome 3B, genomic scaffold, cultivar Chinese Spring	hypothetical protein BVRB_041110, partial [Beta vulgaris subsp. vulgaris]		Uncharacterized protein ORF91 OS=Phalaenopsis aphrodite subsp. formosana PE=4 SV=1
Unigene40863_All	4565	ko00195//Photosynthesis;ko01100//Metabolic pathways	Metabolism	Global and overview maps;Energy metabolism	-1.41476	4.91537e-305	1.66282e-306	K02689//photosystem I P700 chlorophyll a apoprotein A1+ko01100//Metabolic pathways+ko00195//Photosynthesis;K02690//photosystem I P700 chlorophyll a apoprotein A2+ko01100//Metabolic pathways+ko00195//Photosynthesis;K02689//photosystem I P700 chlorophyll a apoprotein A1+ko01100//Metabolic pathways+ko00195//Photosynthesis;K02689//photosystem I P700 chlorophyll a apoprotein A1+ko01100//Metabolic path…	Photosystem I psaA/psaB protein	LC269922.1 Heterosigma akashiwo chloroplast DNA, complete genome, isolate: CCMP3374	photosystem I P700 apoprotein A2 (chloroplast) [Thalassiophyllum clathrus]	[C] LSE2188 A Photosystem I P700 apoprotein A2	Photosystem I P700 chlorophyll a apoprotein A1 OS=Phaeodactylum tricornutum (strain CCAP 1055/1) GN=psaA PE=3 SV=1	GO:0000287//magnesium ion binding;GO:0009055//electron transfer activity;GO:0009535//chloroplast thylakoid membrane;GO:0018298//protein-chromophore linkage;GO:0016021//integral component of membrane;GO:0051539//4 iron, 4 sulfur cluster binding;GO:0016168//chlorophyll binding;GO:0015979//photosynthesis;GO:0009522//photosystem I;GO:0016491//oxidoreductase activity
CL106.Contig18_All	3445	ko00195//Photosynthesis;ko01100//Metabolic pathways;ko00190//Oxidative phosphorylation	Metabolism	Global and overview maps;Energy metabolism	-1.44385	2.92715e-82	2.73578e-83	K02108//F-type H+-transporting ATPase subunit a+ko01100//Metabolic pathways+ko00190//Oxidative phosphorylation+ko00195//Photosynthesis		HG670306.1 Triticum aestivum chromosome 3B, genomic scaffold, cultivar Chinese Spring	cell wall-associated hydrolase, partial [Phaeodactylum tricornutum]		Uncharacterized protein ORF91 OS=Phalaenopsis aphrodite subsp. formosana PE=4 SV=1
Unigene5006_All	4100	ko00195//Photosynthesis;ko01100//Metabolic pathways;ko00190//Oxidative phosphorylation	Metabolism	Energy metabolism;Global and overview maps	-1.45086	2.43781e-44	3.55861e-45	K02108//F-type H+-transporting ATPase subunit a+ko01100//Metabolic pathways+ko00190//Oxidative phosphorylation+ko00195//Photosynthesis;K01358//ATP-dependent Clp protease, protease subunit [EC:3.4.21.92]		HG670306.1 Triticum aestivum chromosome 3B, genomic scaffold, cultivar Chinese Spring	hypothetical protein BVRB_041110, partial [Beta vulgaris subsp. vulgaris]		Uncharacterized protein ORF91 OS=Phalaenopsis aphrodite subsp. formosana PE=4 SV=1
CL3910.Contig2_All	2956	ko00195//Photosynthesis;ko01100//Metabolic pathways	Metabolism	Energy metabolism;Global and overview maps	-1.50372	0	0	K02704//photosystem II CP47 chlorophyll apoprotein+ko01100//Metabolic pathways+ko00195//Photosynthesis;K02704//photosystem II CP47 chlorophyll apoprotein+ko01100//Metabolic pathways+ko00195//Photosynthesis;K02704//photosystem II CP47 chlorophyll apoprotein+ko01100//Metabolic pathways+ko00195//Photosynthesis;K02704//photosystem II CP47 chlorophyll apoprotein+ko01100//Metabolic pathways+ko00195//Ph…	Photosystem II protein	LC269922.1 Heterosigma akashiwo chloroplast DNA, complete genome, isolate: CCMP3374	photosystem II CP47 chlorophyll apoprotein (chloroplast) [Cylindrotheca closterium] >AGH28572.1 photosystem II CP47 chlorophyll apoprotein (chloroplast) (chloroplast) [Cylindrotheca closterium]		Photosystem II CP47 reaction center protein OS=Guillardia theta GN=psbB PE=3 SV=1	GO:0009772//photosynthetic electron transport in photosystem II;GO:0009535//chloroplast thylakoid membrane;GO:0009523//photosystem II;GO:0045156//electron transporter, transferring electrons within the cyclic electron transport pathway of photosynthesis activity;GO:0016021//integral component of membrane;GO:0016168//chlorophyll binding;GO:0009536//plastid;GO:0018298//protein-chromophore linkage;G…
Unigene10194_All	6678	ko00195//Photosynthesis;ko03020//RNA polymerase;ko00190//Oxidative phosphorylation;ko03010//Ribosome;ko01100//Metabolic pathways	Metabolism;Genetic Information Processing	Energy metabolism;Translation;Transcription;Global and overview maps	-1.72625	1.96548e-105	1.54644e-106	K02108//F-type H+-transporting ATPase subunit a+ko01100//Metabolic pathways+ko00190//Oxidative phosphorylation+ko00195//Photosynthesis;K03046//DNA-directed RNA polymerase subunit beta' [EC:2.7.7.6]+ko03020//RNA polymerase;K02948//small subunit ribosomal protein S11+ko03010//Ribosome;K01358//ATP-dependent Clp protease, protease subunit [EC:3.4.21.92]	SIS domain	KT305105.1 Trachelomonas sp. Jilnal030207BT small subunit ribosomal RNA gene, partial sequence; chloroplast	cell wall-associated hydrolase [Phaseolus vulgaris]		Uncharacterized protein ORF91 OS=Phalaenopsis aphrodite subsp. formosana PE=4 SV=1
CL106.Contig71_All	2653	ko00190//Oxidative phosphorylation;ko01100//Metabolic pathways;ko00195//Photosynthesis	Metabolism	Global and overview maps;Energy metabolism	-1.83021	2.63479e-08	1.1955e-08	K02108//F-type H+-transporting ATPase subunit a+ko01100//Metabolic pathways+ko00190//Oxidative phosphorylation+ko00195//Photosynthesis		KU726247.1 Heterosigma akashiwo isolate NEPCC522 mitochondrion, complete genome	hypothetical protein BVRB_020780, partial [Beta vulgaris subsp. vulgaris]		Uncharacterized protein ORF91 OS=Phalaenopsis aphrodite subsp. formosana PE=4 SV=1
CL106.Contig57_All	929	ko01100//Metabolic pathways;ko00195//Photosynthesis;ko00190//Oxidative phosphorylation	Metabolism	Energy metabolism;Global and overview maps	-2.23595	3.85996e-21	9.42777e-22	K02108//F-type H+-transporting ATPase subunit a+ko01100//Metabolic pathways+ko00190//Oxidative phosphorylation+ko00195//Photosynthesis;K01358//ATP-dependent Clp protease, protease subunit [EC:3.4.21.92]		HG670306.1 Triticum aestivum chromosome 3B, genomic scaffold, cultivar Chinese Spring	hypothetical protein BVRB_041110, partial [Beta vulgaris subsp. vulgaris]
CL856.Contig2_All	1473	ko01100//Metabolic pathways;ko00195//Photosynthesis	Metabolism	Global and overview maps;Energy metabolism	-2.2923	0	0	K02691//photosystem I subunit VII+ko01100//Metabolic pathways+ko00195//Photosynthesis;K02691//photosystem I subunit VII+ko01100//Metabolic pathways+ko00195//Photosynthesis;K02691//photosystem I subunit VII+ko01100//Metabolic pathways+ko00195//Photosynthesis;K02691//photosystem I subunit VII+ko01100//Metabolic pathways+ko00195//Photosynthesis;K02691//photosystem I subunit VII+ko01100//Metabolic pa…	Cytochrome C assembly protein	LC269923.1 Heterosigma akashiwo chloroplast DNA, complete genome, isolate: HaFk01	cytochrome c biogenesis protein [Heterosigma akashiwo] >B2XT99.1 RecName: Full=Cytochrome c biogenesis protein CcsA >B2XTQ5.1 RecName: Full=Cytochrome c biogenesis protein CcsA >ABV65997.1 cytochrome c biogenesis protein (chloroplast) [Heterosigma akashiwo] >ABV70138.1 cytochrome c biogenesis protein (chloroplast) [Heterosigma akashiwo] >BBA18206.1 cytochrome c biogenesis protein (chloroplast) [H…		Cytochrome c biogenesis protein CcsA OS=Heterosigma akashiwo (strain NIES-293) GN=ccsA PE=3 SV=1	GO:0020037//heme binding;GO:0009535//chloroplast thylakoid membrane;GO:0017004//cytochrome complex assembly;GO:0016021//integral component of membrane;GO:0009507//chloroplast
CL106.Contig10_All	3142	ko00190//Oxidative phosphorylation;ko01100//Metabolic pathways;ko00195//Photosynthesis	Metabolism	Energy metabolism;Global and overview maps	-2.43582	1.0419e-252	4.15538e-254	K02108//F-type H+-transporting ATPase subunit a+ko01100//Metabolic pathways+ko00190//Oxidative phosphorylation+ko00195//Photosynthesis;K01358//ATP-dependent Clp protease, protease subunit [EC:3.4.21.92]		KJ410683.1 Nannochloropsis oceanica strain LAMB0001 chloroplast, partial genome	hypothetical protein BVRB_041110, partial [Beta vulgaris subsp. vulgaris]		Uncharacterized protein ORF91 OS=Phalaenopsis aphrodite subsp. formosana PE=4 SV=1
CL106.Contig55_All	865	ko01100//Metabolic pathways;ko00195//Photosynthesis;ko00190//Oxidative phosphorylation	Metabolism	Global and overview maps;Energy metabolism	-2.43888	1.20497e-26	2.526e-27	K02108//F-type H+-transporting ATPase subunit a+ko01100//Metabolic pathways+ko00190//Oxidative phosphorylation+ko00195//Photosynthesis;K01358//ATP-dependent Clp protease, protease subunit [EC:3.4.21.92]		LC269924.1 Heterosigma akashiwo chloroplast DNA, complete genome, isolate: CCMP1596	hypothetical protein BVRB_020780, partial [Beta vulgaris subsp. vulgaris]
CL7919.Contig3_All	1500	ko01100//Metabolic pathways;ko00190//Oxidative phosphorylation;ko00195//Photosynthesis	Metabolism	Global and overview maps;Energy metabolism	-2.48135	4.06367e-95	3.43021e-96	K02115//F-type H+-transporting ATPase subunit gamma+ko01100//Metabolic pathways+ko00190//Oxidative phosphorylation+ko00195//Photosynthesis;K02115//F-type H+-transporting ATPase subunit gamma+ko01100//Metabolic pathways+ko00190//Oxidative phosphorylation+ko00195//Photosynthesis;K02115//F-type H+-transporting ATPase subunit gamma+ko01100//Metabolic pathways+ko00190//Oxidative phosphorylation+ko0019…	ATP synthase		ATP synthase [Thalassiosira pseudonana CCMP1335] >EED92675.1 ATP synthase [Thalassiosira pseudonana CCMP1335]	[C] KOG1531 F0F1-type ATP synthase, gamma subunit	ATP synthase gamma chain, chloroplastic OS=Odontella sinensis GN=ATPC PE=1 SV=1	GO:0015986//ATP synthesis coupled proton transport;GO:0045261//proton-transporting ATP synthase complex, catalytic core F(1);GO:0046933//proton-transporting ATP synthase activity, rotational mechanism
CL106.Contig42_All	3557	ko00190//Oxidative phosphorylation;ko00195//Photosynthesis;ko01100//Metabolic pathways	Metabolism	Global and overview maps;Energy metabolism	-2.62946	7.4964e-130	5.09152e-131	K02108//F-type H+-transporting ATPase subunit a+ko01100//Metabolic pathways+ko00190//Oxidative phosphorylation+ko00195//Photosynthesis;K01358//ATP-dependent Clp protease, protease subunit [EC:3.4.21.92]		HG670306.1 Triticum aestivum chromosome 3B, genomic scaffold, cultivar Chinese Spring	cell wall-associated hydrolase [Phaseolus vulgaris]		Uncharacterized protein ORF91 OS=Phalaenopsis aphrodite subsp. formosana PE=4 SV=1
Unigene5519_All	3705	ko01100//Metabolic pathways;ko03010//Ribosome;ko00190//Oxidative phosphorylation;ko00195//Photosynthesis	Genetic Information Processing;Metabolism	Energy metabolism;Global and overview maps;Translation	-2.65548	1.53877e-131	1.03429e-132	K02108//F-type H+-transporting ATPase subunit a+ko01100//Metabolic pathways+ko00190//Oxidative phosphorylation+ko00195//Photosynthesis;K01358//ATP-dependent Clp protease, protease subunit [EC:3.4.21.92];K02948//small subunit ribosomal protein S11+ko03010//Ribosome		KX284721.2 Erythrotrichia carnea plastid, complete genome	hypothetical protein BVRB_041110, partial [Beta vulgaris subsp. vulgaris]		Uncharacterized protein ORF91 OS=Phalaenopsis aphrodite subsp. formosana PE=4 SV=1
CL106.Contig12_All	3120	ko00190//Oxidative phosphorylation;ko00195//Photosynthesis;ko01100//Metabolic pathways	Metabolism	Global and overview maps;Energy metabolism	-2.66661	0	0	K02108//F-type H+-transporting ATPase subunit a+ko01100//Metabolic pathways+ko00190//Oxidative phosphorylation+ko00195//Photosynthesis		HG670306.1 Triticum aestivum chromosome 3B, genomic scaffold, cultivar Chinese Spring	cell wall-associated hydrolase, partial [Phaeodactylum tricornutum]		Uncharacterized protein ORF91 OS=Phalaenopsis aphrodite subsp. formosana PE=4 SV=1
CL106.Contig16_All	3220	ko01100//Metabolic pathways;ko00190//Oxidative phosphorylation;ko00195//Photosynthesis	Metabolism	Global and overview maps;Energy metabolism	-2.77973	0	0	K02108//F-type H+-transporting ATPase subunit a+ko01100//Metabolic pathways+ko00190//Oxidative phosphorylation+ko00195//Photosynthesis;K01358//ATP-dependent Clp protease, protease subunit [EC:3.4.21.92]		KJ410683.1 Nannochloropsis oceanica strain LAMB0001 chloroplast, partial genome	hypothetical protein BVRB_041110, partial [Beta vulgaris subsp. vulgaris]		Uncharacterized protein ORF91 OS=Phalaenopsis aphrodite subsp. formosana PE=4 SV=1
CL106.Contig36_All	2851	ko00190//Oxidative phosphorylation;ko00195//Photosynthesis;ko01100//Metabolic pathways	Metabolism	Energy metabolism;Global and overview maps	-2.82231	3.08e-98	2.54537e-99	K02108//F-type H+-transporting ATPase subunit a+ko01100//Metabolic pathways+ko00190//Oxidative phosphorylation+ko00195//Photosynthesis;K01358//ATP-dependent Clp protease, protease subunit [EC:3.4.21.92]		KX284728.2 Rhodochaete parvula plastid, complete genome	hypothetical protein BVRB_041110, partial [Beta vulgaris subsp. vulgaris]		Uncharacterized protein ORF91 OS=Phalaenopsis aphrodite subsp. formosana PE=4 SV=1
Unigene43289_All	381	ko00190//Oxidative phosphorylation;ko00195//Photosynthesis;ko01100//Metabolic pathways	Metabolism	Global and overview maps;Energy metabolism	-2.9413	1.15618e-08	5.09813e-09	K02113//F-type H+-transporting ATPase subunit delta+ko01100//Metabolic pathways+ko00190//Oxidative phosphorylation+ko00195//Photosynthesis;K02113//F-type H+-transporting ATPase subunit delta+ko01100//Metabolic pathways+ko00190//Oxidative phosphorylation+ko00195//Photosynthesis;K02113//F-type H+-transporting ATPase subunit delta+ko01100//Metabolic pathways+ko00190//Oxidative phosphorylation+ko0019…	Protein of unknown function (DUF4079)		F-type H+-transporting ATPase subunit delta [Monoraphidium neglectum] >KIY92405.1 F-type H+-transporting ATPase subunit delta [Monoraphidium neglectum]		ATP synthase delta chain, chloroplastic OS=Chlamydomonas reinhardtii GN=ATPD PE=1 SV=1	GO:0015986//ATP synthesis coupled proton transport;GO:0016020//membrane;GO:0046933//proton-transporting ATP synthase activity, rotational mechanism
CL106.Contig4_All	2917	ko00190//Oxidative phosphorylation;ko01100//Metabolic pathways;ko00195//Photosynthesis	Metabolism	Energy metabolism;Global and overview maps	-3.033	0	0	K02108//F-type H+-transporting ATPase subunit a+ko01100//Metabolic pathways+ko00190//Oxidative phosphorylation+ko00195//Photosynthesis;K01358//ATP-dependent Clp protease, protease subunit [EC:3.4.21.92]		KJ410683.1 Nannochloropsis oceanica strain LAMB0001 chloroplast, partial genome	hypothetical protein BVRB_041110, partial [Beta vulgaris subsp. vulgaris]		Uncharacterized protein ORF91 OS=Phalaenopsis aphrodite subsp. formosana PE=4 SV=1
Unigene9208_All	2211	ko00190//Oxidative phosphorylation;ko00195//Photosynthesis;ko01100//Metabolic pathways	Metabolism	Energy metabolism;Global and overview maps	-3.20415	3.35436e-103	2.68171e-104	K02108//F-type H+-transporting ATPase subunit a+ko01100//Metabolic pathways+ko00190//Oxidative phosphorylation+ko00195//Photosynthesis;K01358//ATP-dependent Clp protease, protease subunit [EC:3.4.21.92];K22020//mucin-19	Recombinase zinc beta ribbon domain	HG670306.1 Triticum aestivum chromosome 3B, genomic scaffold, cultivar Chinese Spring	hypothetical protein BVRB_020780, partial [Beta vulgaris subsp. vulgaris]		Uncharacterized protein ORF91 OS=Phalaenopsis aphrodite subsp. formosana PE=4 SV=1
CL106.Contig6_All	2422	ko01100//Metabolic pathways;ko00190//Oxidative phosphorylation;ko00195//Photosynthesis	Metabolism	Global and overview maps;Energy metabolism	-3.30836	5.30306e-128	3.63275e-129	K02108//F-type H+-transporting ATPase subunit a+ko01100//Metabolic pathways+ko00190//Oxidative phosphorylation+ko00195//Photosynthesis;K01358//ATP-dependent Clp protease, protease subunit [EC:3.4.21.92]		KJ410683.1 Nannochloropsis oceanica strain LAMB0001 chloroplast, partial genome	hypothetical protein BVRB_041110, partial [Beta vulgaris subsp. vulgaris]		Uncharacterized protein ORF91 OS=Phalaenopsis aphrodite subsp. formosana PE=4 SV=1
CL106.Contig33_All	2625	ko00195//Photosynthesis;ko00190//Oxidative phosphorylation;ko01100//Metabolic pathways	Metabolism	Energy metabolism;Global and overview maps	-3.34137	0	0	K02108//F-type H+-transporting ATPase subunit a+ko01100//Metabolic pathways+ko00190//Oxidative phosphorylation+ko00195//Photosynthesis		AK107373.1 Oryza sativa Japonica Group cDNA clone:002-127-B06, full insert sequence	hypothetical protein BVRB_020780, partial [Beta vulgaris subsp. vulgaris]		Uncharacterized protein ORF91 OS=Phalaenopsis aphrodite subsp. formosana PE=4 SV=1
CL106.Contig46_All	2626	ko00195//Photosynthesis;ko00190//Oxidative phosphorylation;ko01100//Metabolic pathways	Metabolism	Energy metabolism;Global and overview maps	-3.41723	1.13947e-163	6.4398e-165	K02108//F-type H+-transporting ATPase subunit a+ko01100//Metabolic pathways+ko00190//Oxidative phosphorylation+ko00195//Photosynthesis;K01358//ATP-dependent Clp protease, protease subunit [EC:3.4.21.92]		KU726247.1 Heterosigma akashiwo isolate NEPCC522 mitochondrion, complete genome	cell wall-associated hydrolase, partial [Phaeodactylum tricornutum]		Uncharacterized protein ORF91 OS=Phalaenopsis aphrodite subsp. formosana PE=4 SV=1
CL106.Contig21_All	928	ko00195//Photosynthesis;ko01100//Metabolic pathways;ko00190//Oxidative phosphorylation	Metabolism	Energy metabolism;Global and overview maps	-3.5375	4.03098e-37	6.71687e-38	K02108//F-type H+-transporting ATPase subunit a+ko01100//Metabolic pathways+ko00190//Oxidative phosphorylation+ko00195//Photosynthesis		HG670306.1 Triticum aestivum chromosome 3B, genomic scaffold, cultivar Chinese Spring	cell wall-associated hydrolase, partial [Phaeodactylum tricornutum]
CL106.Contig35_All	1396	ko01100//Metabolic pathways;ko00190//Oxidative phosphorylation;ko00195//Photosynthesis	Metabolism	Energy metabolism;Global and overview maps	-3.80759	7.76466e-64	8.76404e-65	K02108//F-type H+-transporting ATPase subunit a+ko01100//Metabolic pathways+ko00190//Oxidative phosphorylation+ko00195//Photosynthesis;K01358//ATP-dependent Clp protease, protease subunit [EC:3.4.21.92]		AK110485.1 Oryza sativa Japonica Group cDNA clone:002-167-B02, full insert sequence	hypothetical protein BVRB_042430, partial [Beta vulgaris subsp. vulgaris]		Uncharacterized protein ORF91 OS=Phalaenopsis aphrodite subsp. formosana PE=4 SV=1
Unigene18772_All	2466	ko00190//Oxidative phosphorylation;ko00195//Photosynthesis;ko01100//Metabolic pathways	Metabolism	Energy metabolism;Global and overview maps	-4.03914	6.74628e-66	7.45719e-67	K02132//F-type H+-transporting ATPase subunit alpha+ko01100//Metabolic pathways+ko00190//Oxidative phosphorylation;K02132//F-type H+-transporting ATPase subunit alpha+ko01100//Metabolic pathways+ko00190//Oxidative phosphorylation;K02132//F-type H+-transporting ATPase subunit alpha+ko01100//Metabolic pathways+ko00190//Oxidative phosphorylation;K02111//F-type H+/Na+-transporting ATPase subunit alph…	ATP synthase delta (OSCP) subunit	KF285533.1 Ostreococcus tauri isolate RCC1561 chloroplast, complete genome	hypothetical protein SOVF_209290, partial [Spinacia oleracea]	[C] KOG1353 F0F1-type ATP synthase, alpha subunit	ATP synthase subunit alpha, chloroplastic OS=Euglena gracilis GN=atpA PE=3 SV=1	GO:0015986//ATP synthesis coupled proton transport;GO:0045261//proton-transporting ATP synthase complex, catalytic core F(1);GO:0005524//ATP binding;GO:0046933//proton-transporting ATP synthase activity, rotational mechanism
CL106.Contig24_All	1256	ko00195//Photosynthesis;ko00190//Oxidative phosphorylation;ko01100//Metabolic pathways	Metabolism	Energy metabolism;Global and overview maps	-4.04366	2.00975e-32	3.69689e-33	K02108//F-type H+-transporting ATPase subunit a+ko01100//Metabolic pathways+ko00190//Oxidative phosphorylation+ko00195//Photosynthesis		LC269924.1 Heterosigma akashiwo chloroplast DNA, complete genome, isolate: CCMP1596	hypothetical protein BVRB_020780, partial [Beta vulgaris subsp. vulgaris]		Uncharacterized protein ORF91 OS=Phalaenopsis aphrodite subsp. formosana PE=4 SV=1
Unigene48011_All	287	ko00195//Photosynthesis;ko00190//Oxidative phosphorylation;ko01100//Metabolic pathways	Metabolism	Global and overview maps;Energy metabolism	-4.49384	0.000965735	0.000743173	K02115//F-type H+-transporting ATPase subunit gamma+ko01100//Metabolic pathways+ko00190//Oxidative phosphorylation+ko00195//Photosynthesis;K02115//F-type H+-transporting ATPase subunit gamma+ko01100//Metabolic pathways+ko00190//Oxidative phosphorylation+ko00195//Photosynthesis
Unigene73593_All	537	ko00195//Photosynthesis	Metabolism	Energy metabolism	-4.49384	0.000965735	0.000743173	K02639//ferredoxin+ko00195//Photosynthesis;K02639//ferredoxin+ko00195//Photosynthesis;K02639//ferredoxin+ko00195//Photosynthesis;K02639//ferredoxin+ko00195//Photosynthesis	2Fe-2S iron-sulfur cluster binding domain		PREDICTED: ferredoxin, root R-B1-like isoform X2 [Raphanus sativus]		Ferredoxin, root R-B1 OS=Raphanus sativus PE=1 SV=1
Unigene48058_All	991	ko00190//Oxidative phosphorylation;ko00195//Photosynthesis;ko01100//Metabolic pathways	Metabolism	Global and overview maps;Energy metabolism	-4.78929	1.79977e-07	8.74502e-08	K02109//F-type H+-transporting ATPase subunit b+ko01100//Metabolic pathways+ko00190//Oxidative phosphorylation+ko00195//Photosynthesis;K02109//F-type H+-transporting ATPase subunit b+ko01100//Metabolic pathways+ko00190//Oxidative phosphorylation+ko00195//Photosynthesis;K02109//F-type H+-transporting ATPase subunit b+ko01100//Metabolic pathways+ko00190//Oxidative phosphorylation+ko00195//Photosynt…	ATP synthase B/B' CF(0)		F-ATPase family transporter: protons (mitochondrial) [Ostreococcus lucimarinus CCE9901] >ABO94039.1 F-ATPase family transporter: protons (mitochondrial) [Ostreococcus lucimarinus CCE9901]	[C] KOG0232 Vacuolar H+-ATPase V0 sector, subunits c/c'	ATP synthase subunit C, cyanelle OS=Cyanophora paradoxa GN=atpE PE=3 SV=1	GO:0015986//ATP synthesis coupled proton transport;GO:0045263//proton-transporting ATP synthase complex, coupling factor F(o);GO:0016021//integral component of membrane;GO:0015078//hydrogen ion transmembrane transporter activity;GO:0009536//plastid;GO:0005886//plasma membrane;GO:0046933//proton-transporting ATP synthase activity, rotational mechanism
Unigene46712_All	917	ko00195//Photosynthesis;ko00190//Oxidative phosphorylation;ko01100//Metabolic pathways	Metabolism	Global and overview maps;Energy metabolism	-4.84176	1.00728e-07	4.78635e-08	K02109//F-type H+-transporting ATPase subunit b+ko01100//Metabolic pathways+ko00190//Oxidative phosphorylation+ko00195//Photosynthesis;K02110//F-type H+-transporting ATPase subunit c+ko01100//Metabolic pathways+ko00190//Oxidative phosphorylation+ko00195//Photosynthesis;K02110//F-type H+-transporting ATPase subunit c+ko01100//Metabolic pathways+ko00190//Oxidative phosphorylation+ko00195//Photosynt…	ATP synthase B/B' CF(0)		ATP synthase CF0 C subunit [Cyanophora paradoxa] >P48086.1 RecName: Full=ATP synthase subunit C, cyanelle; AltName: Full=ATP synthase F0 sector subunit C; AltName: Full=ATPase subunit III; AltName: Full=Lipid-binding protein >AAA81257.1 c subunit of the F0 portion of ATP synthase [Cyanophora paradoxa] >AIU44581.1 ATP synthase CF0 C subunit (cyanelle) [Cyanophora paradoxa]	[C] KOG0232 Vacuolar H+-ATPase V0 sector, subunits c/c'	ATP synthase subunit C, cyanelle OS=Cyanophora paradoxa GN=atpE PE=3 SV=1	GO:0033115//cyanelle thylakoid membrane;GO:0009535//chloroplast thylakoid membrane;GO:0015986//ATP synthesis coupled proton transport;GO:0008289//lipid binding;GO:0015991//ATP hydrolysis coupled proton transport;GO:0045263//proton-transporting ATP synthase complex, coupling factor F(o);GO:0016021//integral component of membrane;GO:0009536//plastid;GO:0015078//hydrogen ion transmembrane transporte…
Unigene61447_All	1036	ko01100//Metabolic pathways;ko00190//Oxidative phosphorylation;ko00195//Photosynthesis	Metabolism	Energy metabolism;Global and overview maps	-5.0788	5.61589e-09	2.42483e-09	K02115//F-type H+-transporting ATPase subunit gamma+ko01100//Metabolic pathways+ko00190//Oxidative phosphorylation+ko00195//Photosynthesis;K02115//F-type H+-transporting ATPase subunit gamma+ko01100//Metabolic pathways+ko00190//Oxidative phosphorylation+ko00195//Photosynthesis;K02115//F-type H+-transporting ATPase subunit gamma+ko01100//Metabolic pathways+ko00190//Oxidative phosphorylation+ko0019…	ATP synthase		ATP synthase subunit C (chromatophore) [Paulinella chromatophora] >ACB42656.1 ATP synthase subunit C (chromatophore) [Paulinella chromatophora]	[C] KOG1531 F0F1-type ATP synthase, gamma subunit	ATP synthase gamma chain, chloroplastic OS=Pisum sativum GN=ATPC PE=2 SV=1	GO:0015986//ATP synthesis coupled proton transport;GO:0045261//proton-transporting ATP synthase complex, catalytic core F(1);GO:0009536//plastid;GO:0046933//proton-transporting ATP synthase activity, rotational mechanism
Unigene31393_All	443	ko00190//Oxidative phosphorylation;ko01100//Metabolic pathways;ko00195//Photosynthesis	Metabolism	Global and overview maps;Energy metabolism	-5.35633	5.39685e-06	3.03151e-06	K02133//F-type H+-transporting ATPase subunit beta [EC:7.1.2.2]+ko01100//Metabolic pathways+ko00190//Oxidative phosphorylation;K02112//F-type H+/Na+-transporting ATPase subunit beta [EC:7.1.2.2 7.2.2.1]+ko01100//Metabolic pathways+ko00190//Oxidative phosphorylation+ko00195//Photosynthesis;K02133//F-type H+-transporting ATPase subunit beta [EC:7.1.2.2]+ko01100//Metabolic pathways+ko00190//Oxidativ…			ATP synthase CF1 beta subunit [Cyanophora paradoxa] >P48081.1 RecName: Full=ATP synthase subunit beta, cyanelle; AltName: Full=ATP synthase F1 sector subunit beta; AltName: Full=F-ATPase subunit beta >AAA81272.1 beta subunit of the F1 portion of ATP synthase [Cyanophora paradoxa]	[C] KOG1350 F0F1-type ATP synthase, beta subunit	ATP synthase subunit beta, cyanelle OS=Cyanophora paradoxa GN=atpB PE=3 SV=1	GO:0015986//ATP synthesis coupled proton transport;GO:0045261//proton-transporting ATP synthase complex, catalytic core F(1);GO:0033115//cyanelle thylakoid membrane;GO:0005524//ATP binding;GO:0046933//proton-transporting ATP synthase activity, rotational mechanism

## Sheet: Photosynthesis antenna
Supplementary Table 2:	Differentially expressed genes involved in photosynthesis antenna metabolism
Gene ID	Length	Pathway Name	Level 1	Level 2	log2(He_1000/He_400)	Qvalue(He_400-vs-He_1000)	Pvalue(He_400-vs-He_1000)	Kegg Orthology	Pfam	Nt	Nr	Kog	Swissprot	GO
Unigene54614_All	568	ko00196//Photosynthesis - antenna proteins	Metabolism	Energy metabolism	3.05306	0.000418528	0.000302066	K08907//light-harvesting complex I chlorophyll a/b binding protein 1+ko00196//Photosynthesis - antenna proteins;K08907//light-harvesting complex I chlorophyll a/b binding protein 1+ko00196//Photosynthesis - antenna proteins;K08907//light-harvesting complex I chlorophyll a/b binding protein 1+ko00196//Photosynthesis - antenna proteins;K08907//light-harvesting complex I chlorophyll a/b binding prot…	Chlorophyll A-B binding protein		hypothetical protein THAOC_37813 [Thalassiosira oceanica]	[C] LSE0391 A Chlorophyll A/B binding protein	Chlorophyll a-b binding protein 6, chloroplastic OS=Arabidopsis thaliana GN=LHCA1 PE=1 SV=1	GO:0009768//photosynthesis, light harvesting in photosystem I;GO:0009535//chloroplast thylakoid membrane;GO:0009416//response to light stimulus;GO:0018298//protein-chromophore linkage;GO:0031409//pigment binding;GO:0009765//photosynthesis, light harvesting;GO:0016021//integral component of membrane;GO:0016168//chlorophyll binding
Unigene13499_All	1149	ko00196//Photosynthesis - antenna proteins	Metabolism	Energy metabolism	2.47858	0	0	K08907//light-harvesting complex I chlorophyll a/b binding protein 1+ko00196//Photosynthesis - antenna proteins;K08907//light-harvesting complex I chlorophyll a/b binding protein 1+ko00196//Photosynthesis - antenna proteins	Chlorophyll A-B binding protein	X99697.1 H.carterae mRNA for fucoxanthin chlorophyll a/c binding protein, Fcp1	fucoxanthin chlorophyll a /c binding protein [Heterosigma akashiwo]		Fucoxanthin-chlorophyll a-c binding protein A, chloroplastic OS=Macrocystis pyrifera GN=FCPA PE=2 SV=1
Unigene28390_All	770	ko00196//Photosynthesis - antenna proteins	Metabolism	Energy metabolism	2.35791	0.000628835	0.000467296	K08907//light-harvesting complex I chlorophyll a/b binding protein 1+ko00196//Photosynthesis - antenna proteins;K08907//light-harvesting complex I chlorophyll a/b binding protein 1+ko00196//Photosynthesis - antenna proteins;K08907//light-harvesting complex I chlorophyll a/b binding protein 1+ko00196//Photosynthesis - antenna proteins;K08907//light-harvesting complex I chlorophyll a/b binding prot…	Chlorophyll A-B binding protein		fucoxanthin chl a/c light-harvesting protein [Thalassiosira pseudonana CCMP1335] >EED92402.1 fucoxanthin chl a/c light-harvesting protein [Thalassiosira pseudonana CCMP1335]	[C] LSE0391 A Chlorophyll A/B binding protein	Chlorophyll a-b binding protein CP24, chloroplastic OS=Spinacia oleracea PE=2 SV=1	GO:0009768//photosynthesis, light harvesting in photosystem I;GO:0009535//chloroplast thylakoid membrane;GO:0009416//response to light stimulus;GO:0018298//protein-chromophore linkage;GO:0031409//pigment binding;GO:0009765//photosynthesis, light harvesting;GO:0016021//integral component of membrane;GO:0016168//chlorophyll binding
Unigene88440_All	781	ko00196//Photosynthesis - antenna proteins	Metabolism	Energy metabolism	2.26204	2.11342e-21	5.11304e-22	K08907//light-harvesting complex I chlorophyll a/b binding protein 1+ko00196//Photosynthesis - antenna proteins;K08907//light-harvesting complex I chlorophyll a/b binding protein 1+ko00196//Photosynthesis - antenna proteins	Chlorophyll A-B binding protein	X99697.1 H.carterae mRNA for fucoxanthin chlorophyll a/c binding protein, Fcp1	fucoxanthin chlorophyll a /c binding protein [Heterosigma akashiwo]		Fucoxanthin-chlorophyll a-c binding protein B, chloroplastic OS=Macrocystis pyrifera GN=FCPB PE=2 SV=1
Unigene44145_All	1084	ko00196//Photosynthesis - antenna proteins	Metabolism	Energy metabolism	1.8604	0	0	K08907//light-harvesting complex I chlorophyll a/b binding protein 1+ko00196//Photosynthesis - antenna proteins;K08907//light-harvesting complex I chlorophyll a/b binding protein 1+ko00196//Photosynthesis - antenna proteins	Chlorophyll A-B binding protein	X99697.1 H.carterae mRNA for fucoxanthin chlorophyll a/c binding protein, Fcp1	fucoxanthin chlorophyll a /c binding protein [Heterosigma akashiwo]		Fucoxanthin-chlorophyll a-c binding protein F, chloroplastic (Fragment) OS=Macrocystis pyrifera GN=FCPF PE=2 SV=1
Unigene77128_All	873	ko00196//Photosynthesis - antenna proteins	Metabolism	Energy metabolism	1.85785	0	0	K08907//light-harvesting complex I chlorophyll a/b binding protein 1+ko00196//Photosynthesis - antenna proteins;K08907//light-harvesting complex I chlorophyll a/b binding protein 1+ko00196//Photosynthesis - antenna proteins	Chlorophyll A-B binding protein	X99697.1 H.carterae mRNA for fucoxanthin chlorophyll a/c binding protein, Fcp1	fucoxanthin chlorophyll a /c binding protein [Heterosigma akashiwo]		Fucoxanthin-chlorophyll a-c binding protein D, chloroplastic (Fragment) OS=Macrocystis pyrifera GN=FCPD PE=2 SV=1
Unigene42250_All	1790	ko00196//Photosynthesis - antenna proteins	Metabolism	Energy metabolism	1.8163	0	0	K08907//light-harvesting complex I chlorophyll a/b binding protein 1+ko00196//Photosynthesis - antenna proteins;K08907//light-harvesting complex I chlorophyll a/b binding protein 1+ko00196//Photosynthesis - antenna proteins;K08907//light-harvesting complex I chlorophyll a/b binding protein 1+ko00196//Photosynthesis - antenna proteins;K08907//light-harvesting complex I chlorophyll a/b binding prot…	Chlorophyll A-B binding protein		light harvesting complex protein, partial [Guillardia theta]		Fucoxanthin-chlorophyll a-c binding protein B, chloroplastic OS=Phaeodactylum tricornutum GN=FCPB PE=3 SV=1	GO:0009765//photosynthesis, light harvesting;GO:0009535//chloroplast thylakoid membrane;GO:0016021//integral component of membrane;GO:0016168//chlorophyll binding;GO:0018298//protein-chromophore linkage
Unigene35971_All	883	ko00196//Photosynthesis - antenna proteins	Metabolism	Energy metabolism	1.79157	9.81752e-05	6.43028e-05	K08907//light-harvesting complex I chlorophyll a/b binding protein 1+ko00196//Photosynthesis - antenna proteins;K08907//light-harvesting complex I chlorophyll a/b binding protein 1+ko00196//Photosynthesis - antenna proteins;K08907//light-harvesting complex I chlorophyll a/b binding protein 1+ko00196//Photosynthesis - antenna proteins;K08907//light-harvesting complex I chlorophyll a/b binding prot…	Chlorophyll A-B binding protein	XM_002295542.1 Thalassiosira pseudonana CCMP1335 fucoxanthin chlorophyll a/c protein -LI818 clade (Lhcx6_1), partial mRNA	hypothetical protein THAOC_08095 [Thalassiosira oceanica]	[C] LSE0391 A Chlorophyll A/B binding protein	Fucoxanthin-chlorophyll a-c binding protein D, chloroplastic OS=Phaeodactylum tricornutum GN=FCPD PE=3 SV=1	GO:0009768//photosynthesis, light harvesting in photosystem I;GO:0009535//chloroplast thylakoid membrane;GO:0009416//response to light stimulus;GO:0018298//protein-chromophore linkage;GO:0031409//pigment binding;GO:0009765//photosynthesis, light harvesting;GO:0016021//integral component of membrane;GO:0016168//chlorophyll binding
CL7808.Contig1_All	1945	ko00196//Photosynthesis - antenna proteins	Metabolism	Energy metabolism	1.75994	0	0	K08907//light-harvesting complex I chlorophyll a/b binding protein 1+ko00196//Photosynthesis - antenna proteins;K08907//light-harvesting complex I chlorophyll a/b binding protein 1+ko00196//Photosynthesis - antenna proteins;K08907//light-harvesting complex I chlorophyll a/b binding protein 1+ko00196//Photosynthesis - antenna proteins	Chlorophyll A-B binding protein		hypothetical protein THAOC_09862 [Thalassiosira oceanica]		Light-harvesting complex I LH38 proteins (Fragment) OS=Euglena gracilis PE=2 SV=1	GO:0009765//photosynthesis, light harvesting;GO:0009535//chloroplast thylakoid membrane;GO:0016021//integral component of membrane;GO:0016168//chlorophyll binding;GO:0018298//protein-chromophore linkage
Unigene50512_All	1059	ko00196//Photosynthesis - antenna proteins	Metabolism	Energy metabolism	1.72681	0	0	K08907//light-harvesting complex I chlorophyll a/b binding protein 1+ko00196//Photosynthesis - antenna proteins;K08907//light-harvesting complex I chlorophyll a/b binding protein 1+ko00196//Photosynthesis - antenna proteins	Chlorophyll A-B binding protein	X99697.1 H.carterae mRNA for fucoxanthin chlorophyll a/c binding protein, Fcp1	fucoxanthin chlorophyll a /c binding protein [Heterosigma akashiwo]		Fucoxanthin-chlorophyll a-c binding protein D, chloroplastic (Fragment) OS=Macrocystis pyrifera GN=FCPD PE=2 SV=1
Unigene30903_All	1344	ko00196//Photosynthesis - antenna proteins	Metabolism	Energy metabolism	1.72036	0	0	K08907//light-harvesting complex I chlorophyll a/b binding protein 1+ko00196//Photosynthesis - antenna proteins;K08910//light-harvesting complex I chlorophyll a/b binding protein 4+ko00196//Photosynthesis - antenna proteins;K08907//light-harvesting complex I chlorophyll a/b binding protein 1+ko00196//Photosynthesis - antenna proteins;K08907//light-harvesting complex I chlorophyll a/b binding prot…	Chlorophyll A-B binding protein		light harvesting complex protein [Chrysochromulina sp. CCMP291]	[C] LSE0391 A Chlorophyll A/B binding protein	Fucoxanthin-chlorophyll a-c binding protein A, chloroplastic OS=Macrocystis pyrifera GN=FCPA PE=2 SV=1
CL7808.Contig2_All	1862	ko00196//Photosynthesis - antenna proteins	Metabolism	Energy metabolism	1.71315	1.36415e-56	1.68267e-57	K08907//light-harvesting complex I chlorophyll a/b binding protein 1+ko00196//Photosynthesis - antenna proteins;K08907//light-harvesting complex I chlorophyll a/b binding protein 1+ko00196//Photosynthesis - antenna proteins;K08907//light-harvesting complex I chlorophyll a/b binding protein 1+ko00196//Photosynthesis - antenna proteins	Chlorophyll A-B binding protein		hypothetical protein THAOC_09862 [Thalassiosira oceanica]		Light-harvesting complex I LH38 proteins (Fragment) OS=Euglena gracilis PE=2 SV=1	GO:0009765//photosynthesis, light harvesting;GO:0009535//chloroplast thylakoid membrane;GO:0016021//integral component of membrane;GO:0016168//chlorophyll binding;GO:0018298//protein-chromophore linkage
Unigene43035_All	1021	ko00196//Photosynthesis - antenna proteins	Metabolism	Energy metabolism	1.66603	1.76788e-06	9.41995e-07	K08907//light-harvesting complex I chlorophyll a/b binding protein 1+ko00196//Photosynthesis - antenna proteins;K08907//light-harvesting complex I chlorophyll a/b binding protein 1+ko00196//Photosynthesis - antenna proteins;K08907//light-harvesting complex I chlorophyll a/b binding protein 1+ko00196//Photosynthesis - antenna proteins;K08911//light-harvesting complex I chlorophyll a/b binding prot…	Chlorophyll A-B binding protein	XM_002287341.1 Thalassiosira pseudonana CCMP1335 fucoxanthin chl a/c protein, lhca clade (Lhca2), partial mRNA	hypothetical protein THAOC_34573 [Thalassiosira oceanica]	[C] LSE0391 A Chlorophyll A/B binding protein	Chlorophyll a-b binding protein 6A, chloroplastic OS=Solanum lycopersicum GN=CAB6A PE=2 SV=1	GO:0009768//photosynthesis, light harvesting in photosystem I;GO:0031409//pigment binding;GO:0009535//chloroplast thylakoid membrane;GO:0009416//response to light stimulus;GO:0016021//integral component of membrane;GO:0016168//chlorophyll binding;GO:0018298//protein-chromophore linkage
Unigene20234_All	759	ko00196//Photosynthesis - antenna proteins	Metabolism	Energy metabolism	1.63545	0.000525122	0.000384047	K08907//light-harvesting complex I chlorophyll a/b binding protein 1+ko00196//Photosynthesis - antenna proteins;K08907//light-harvesting complex I chlorophyll a/b binding protein 1+ko00196//Photosynthesis - antenna proteins;K08910//light-harvesting complex I chlorophyll a/b binding protein 4+ko00196//Photosynthesis - antenna proteins;K08907//light-harvesting complex I chlorophyll a/b binding prot…	Chlorophyll A-B binding protein		fucoxanthin chl a/c light-harvesting protein, lhcr type [Thalassiosira pseudonana CCMP1335] >EED90328.1 fucoxanthin chl a/c light-harvesting protein, lhcr type [Thalassiosira pseudonana CCMP1335]	[C] LSE0391 A Chlorophyll A/B binding protein	Chlorophyll a-b binding protein L1818, chloroplastic OS=Chlamydomonas moewusii GN=L1818 PE=2 SV=1	GO:0009768//photosynthesis, light harvesting in photosystem I;GO:0009535//chloroplast thylakoid membrane;GO:0009416//response to light stimulus;GO:0018298//protein-chromophore linkage;GO:0031409//pigment binding;GO:0009765//photosynthesis, light harvesting;GO:0016021//integral component of membrane;GO:0016168//chlorophyll binding
Unigene9726_All	1179	ko00196//Photosynthesis - antenna proteins	Metabolism	Energy metabolism	1.57825	0	0	K08907//light-harvesting complex I chlorophyll a/b binding protein 1+ko00196//Photosynthesis - antenna proteins;K08907//light-harvesting complex I chlorophyll a/b binding protein 1+ko00196//Photosynthesis - antenna proteins	Chlorophyll A-B binding protein	EF115376.1 Heterosigma akashiwo strain CCMP 452 chloroplast chlorophyll a/c binding precursor protein (fcp2) gene, partial cds; nuclear gene for chloroplast product	fucoxanthin chlorophyll a /c binding protein [Heterosigma akashiwo]		Fucoxanthin-chlorophyll a-c binding protein A, chloroplastic OS=Macrocystis pyrifera GN=FCPA PE=2 SV=1
CL10656.Contig2_All	1434	ko00196//Photosynthesis - antenna proteins	Metabolism	Energy metabolism	1.50636	6.23381e-276	2.29941e-277	K08907//light-harvesting complex I chlorophyll a/b binding protein 1+ko00196//Photosynthesis - antenna proteins;K08907//light-harvesting complex I chlorophyll a/b binding protein 1+ko00196//Photosynthesis - antenna proteins;K08907//light-harvesting complex I chlorophyll a/b binding protein 1+ko00196//Photosynthesis - antenna proteins;K08907//light-harvesting complex I chlorophyll a/b binding prot…	Chlorophyll A-B binding protein		chloroplast light harvesting protein isoform 4 [Nannochloropsis gaditana]	[C] LSE0391 A Chlorophyll A/B binding protein	Fucoxanthin-chlorophyll a-c binding protein, chloroplastic OS=Isochrysis galbana GN=FCP PE=1 SV=1	GO:0009765//photosynthesis, light harvesting;GO:0009535//chloroplast thylakoid membrane;GO:0016021//integral component of membrane;GO:0016168//chlorophyll binding;GO:0018298//protein-chromophore linkage
Unigene39280_All	778	ko00196//Photosynthesis - antenna proteins	Metabolism	Energy metabolism	1.48203	7.39747e-13	2.5202e-13	K08907//light-harvesting complex I chlorophyll a/b binding protein 1+ko00196//Photosynthesis - antenna proteins	Chlorophyll A-B binding protein	U66179.1 Skeletonema costatum fucoxanthin-chlorophyll a/c light harvesting protein (scfcpG) mRNA, 5' end, partial cds	fucoxanthin-chlorophyll a/c light-harvesting protein, partial [Skeletonema costatum]		Fucoxanthin-chlorophyll a-c binding protein, chloroplastic OS=Odontella sinensis GN=FCPA PE=2 SV=1	GO:0009768//photosynthesis, light harvesting in photosystem I;GO:0031409//pigment binding;GO:0009535//chloroplast thylakoid membrane;GO:0009416//response to light stimulus;GO:0016021//integral component of membrane;GO:0016168//chlorophyll binding;GO:0018298//protein-chromophore linkage
CL9572.Contig2_All	932	ko00196//Photosynthesis - antenna proteins	Metabolism	Energy metabolism	1.45462	0	0	K08907//light-harvesting complex I chlorophyll a/b binding protein 1+ko00196//Photosynthesis - antenna proteins;K08907//light-harvesting complex I chlorophyll a/b binding protein 1+ko00196//Photosynthesis - antenna proteins;K08907//light-harvesting complex I chlorophyll a/b binding protein 1+ko00196//Photosynthesis - antenna proteins	Chlorophyll A-B binding protein	X99697.1 H.carterae mRNA for fucoxanthin chlorophyll a/c binding protein, Fcp1	fucoxanthin chlorophyll a /c binding protein [Heterosigma akashiwo]		Fucoxanthin-chlorophyll a-c binding protein E, chloroplastic OS=Macrocystis pyrifera GN=FCPE PE=2 SV=1
Unigene42522_All	825	ko00196//Photosynthesis - antenna proteins	Metabolism	Energy metabolism	1.34411	0.000262523	0.000183099	K08907//light-harvesting complex I chlorophyll a/b binding protein 1+ko00196//Photosynthesis - antenna proteins;K08907//light-harvesting complex I chlorophyll a/b binding protein 1+ko00196//Photosynthesis - antenna proteins	Chlorophyll A-B binding protein	XM_002287987.1 Thalassiosira pseudonana CCMP1335 fucoxanthin-chlorophyll a-c binding protein, plastid precursor (Lhcf11), mRNA	hypothetical protein THAOC_09684 [Thalassiosira oceanica]	[T] KOG1187 Serine/threonine protein kinase	Fucoxanthin-chlorophyll a-c binding protein B, chloroplastic OS=Phaeodactylum tricornutum GN=FCPB PE=3 SV=1	GO:0009768//photosynthesis, light harvesting in photosystem I;GO:0009535//chloroplast thylakoid membrane;GO:0009416//response to light stimulus;GO:0018298//protein-chromophore linkage;GO:0031409//pigment binding;GO:0009765//photosynthesis, light harvesting;GO:0016021//integral component of membrane;GO:0016168//chlorophyll binding
CL5092.Contig1_All	1111	ko00196//Photosynthesis - antenna proteins	Metabolism	Energy metabolism	1.25271	0	0	K08907//light-harvesting complex I chlorophyll a/b binding protein 1+ko00196//Photosynthesis - antenna proteins;K08907//light-harvesting complex I chlorophyll a/b binding protein 1+ko00196//Photosynthesis - antenna proteins	Chlorophyll A-B binding protein	X99697.1 H.carterae mRNA for fucoxanthin chlorophyll a/c binding protein, Fcp1	fucoxanthin chlorophyll a /c binding protein [Heterosigma akashiwo]		Fucoxanthin-chlorophyll a-c binding protein D, chloroplastic (Fragment) OS=Macrocystis pyrifera GN=FCPD PE=2 SV=1
Unigene57989_All	1042	ko00196//Photosynthesis - antenna proteins	Metabolism	Energy metabolism	1.24739	0	0	K08907//light-harvesting complex I chlorophyll a/b binding protein 1+ko00196//Photosynthesis - antenna proteins;K08907//light-harvesting complex I chlorophyll a/b binding protein 1+ko00196//Photosynthesis - antenna proteins;K08907//light-harvesting complex I chlorophyll a/b binding protein 1+ko00196//Photosynthesis - antenna proteins	Chlorophyll A-B binding protein	X99697.1 H.carterae mRNA for fucoxanthin chlorophyll a/c binding protein, Fcp1	fucoxanthin chlorophyll a /c binding protein [Heterosigma akashiwo]		Fucoxanthin-chlorophyll a-c binding protein A, chloroplastic OS=Macrocystis pyrifera GN=FCPA PE=2 SV=1
CL5092.Contig3_All	1002	ko00196//Photosynthesis - antenna proteins	Metabolism	Energy metabolism	1.11485	0	0	K08907//light-harvesting complex I chlorophyll a/b binding protein 1+ko00196//Photosynthesis - antenna proteins;K08907//light-harvesting complex I chlorophyll a/b binding protein 1+ko00196//Photosynthesis - antenna proteins;K08907//light-harvesting complex I chlorophyll a/b binding protein 1+ko00196//Photosynthesis - antenna proteins	Chlorophyll A-B binding protein	X99697.1 H.carterae mRNA for fucoxanthin chlorophyll a/c binding protein, Fcp1	fucoxanthin chlorophyll a /c binding protein [Heterosigma akashiwo]		Fucoxanthin-chlorophyll a-c binding protein D, chloroplastic (Fragment) OS=Macrocystis pyrifera GN=FCPD PE=2 SV=1
Unigene32713_All	1193	ko00196//Photosynthesis - antenna proteins	Metabolism	Energy metabolism	1.10275	0	0	K08907//light-harvesting complex I chlorophyll a/b binding protein 1+ko00196//Photosynthesis - antenna proteins;K08907//light-harvesting complex I chlorophyll a/b binding protein 1+ko00196//Photosynthesis - antenna proteins	Chlorophyll A-B binding protein	X99697.1 H.carterae mRNA for fucoxanthin chlorophyll a/c binding protein, Fcp1	fucoxanthin chlorophyll a /c binding protein [Heterosigma akashiwo]		Fucoxanthin-chlorophyll a-c binding protein A, chloroplastic OS=Phaeodactylum tricornutum GN=FCPA PE=2 SV=1
CL5092.Contig4_All	1379	ko00196//Photosynthesis - antenna proteins	Metabolism	Energy metabolism	1.04907	0	0	K08907//light-harvesting complex I chlorophyll a/b binding protein 1+ko00196//Photosynthesis - antenna proteins;K08907//light-harvesting complex I chlorophyll a/b binding protein 1+ko00196//Photosynthesis - antenna proteins	Chlorophyll A-B binding protein	X99697.1 H.carterae mRNA for fucoxanthin chlorophyll a/c binding protein, Fcp1	fucoxanthin chlorophyll a /c binding protein [Heterosigma akashiwo]		Fucoxanthin-chlorophyll a-c binding protein D, chloroplastic (Fragment) OS=Macrocystis pyrifera GN=FCPD PE=2 SV=1
CL9465.Contig1_All	1142	ko00196//Photosynthesis - antenna proteins	Metabolism	Energy metabolism	-1.50883	0	0	K08907//light-harvesting complex I chlorophyll a/b binding protein 1+ko00196//Photosynthesis - antenna proteins;K08907//light-harvesting complex I chlorophyll a/b binding protein 1+ko00196//Photosynthesis - antenna proteins;K08907//light-harvesting complex I chlorophyll a/b binding protein 1+ko00196//Photosynthesis - antenna proteins	Chlorophyll A-B binding protein	X99697.1 H.carterae mRNA for fucoxanthin chlorophyll a/c binding protein, Fcp1	fucoxanthin chlorophyll a /c binding protein [Heterosigma akashiwo]		Fucoxanthin-chlorophyll a-c binding protein D, chloroplastic (Fragment) OS=Macrocystis pyrifera GN=FCPD PE=2 SV=1
Unigene36977_All	1302	ko00196//Photosynthesis - antenna proteins	Metabolism	Energy metabolism	-1.67649	9.40953e-151	5.70205e-152	K08907//light-harvesting complex I chlorophyll a/b binding protein 1+ko00196//Photosynthesis - antenna proteins;K08908//light-harvesting complex I chlorophyll a/b binding protein 2+ko00196//Photosynthesis - antenna proteins;K08907//light-harvesting complex I chlorophyll a/b binding protein 1+ko00196//Photosynthesis - antenna proteins;K08908//light-harvesting complex I chlorophyll a/b binding prot…	Chlorophyll A-B binding protein	AM050696.1 Rhodomonas sp. CS24 lhcc5 gene for light-harvesting complex protein Lhcc5 precursor, exons 1-3	Light harvesting complex protein [Ectocarpus siliculosus]	[C] LSE0391 A Chlorophyll A/B binding protein	Chlorophyll a-b binding protein L1818, chloroplastic OS=Chlamydomonas moewusii GN=L1818 PE=2 SV=1	GO:0009765//photosynthesis, light harvesting;GO:0009535//chloroplast thylakoid membrane;GO:0016021//integral component of membrane;GO:0016168//chlorophyll binding;GO:0018298//protein-chromophore linkage
Unigene43596_All	568	ko00196//Photosynthesis - antenna proteins	Metabolism	Energy metabolism	-1.86448	0.000240262	0.000166741	K08907//light-harvesting complex I chlorophyll a/b binding protein 1+ko00196//Photosynthesis - antenna proteins	Chlorophyll A-B binding protein		Light harvesting complex protein [Ectocarpus siliculosus]		Fucoxanthin-chlorophyll a-c binding protein C, chloroplastic OS=Phaeodactylum tricornutum GN=FCPC PE=2 SV=1
CL7440.Contig4_All	1313	ko00196//Photosynthesis - antenna proteins	Metabolism	Energy metabolism	-1.9248	0	0	K08907//light-harvesting complex I chlorophyll a/b binding protein 1+ko00196//Photosynthesis - antenna proteins;K08907//light-harvesting complex I chlorophyll a/b binding protein 1+ko00196//Photosynthesis - antenna proteins;K08907//light-harvesting complex I chlorophyll a/b binding protein 1+ko00196//Photosynthesis - antenna proteins;K08907//light-harvesting complex I chlorophyll a/b binding prot…	Chlorophyll A-B binding protein		Light harvesting complex protein [Ectocarpus siliculosus]	[C] LSE0391 A Chlorophyll A/B binding protein	Chlorophyll a-b binding protein L1818, chloroplastic OS=Chlamydomonas moewusii GN=L1818 PE=2 SV=1	GO:0009765//photosynthesis, light harvesting;GO:0009535//chloroplast thylakoid membrane;GO:0016021//integral component of membrane;GO:0016168//chlorophyll binding;GO:0018298//protein-chromophore linkage
CL8869.Contig1_All	1174	ko00196//Photosynthesis - antenna proteins	Metabolism	Energy metabolism	-2.00816	6.52589e-39	1.04804e-39	K08907//light-harvesting complex I chlorophyll a/b binding protein 1+ko00196//Photosynthesis - antenna proteins;K08907//light-harvesting complex I chlorophyll a/b binding protein 1+ko00196//Photosynthesis - antenna proteins;K08907//light-harvesting complex I chlorophyll a/b binding protein 1+ko00196//Photosynthesis - antenna proteins	Chlorophyll A-B binding protein	X99697.1 H.carterae mRNA for fucoxanthin chlorophyll a/c binding protein, Fcp1	fucoxanthin chlorophyll a /c binding protein [Heterosigma akashiwo]		Fucoxanthin-chlorophyll a-c binding protein E, chloroplastic OS=Macrocystis pyrifera GN=FCPE PE=2 SV=1
CL7440.Contig2_All	1036	ko00196//Photosynthesis - antenna proteins	Metabolism	Energy metabolism	-2.2239	0	0	K08907//light-harvesting complex I chlorophyll a/b binding protein 1+ko00196//Photosynthesis - antenna proteins;K08907//light-harvesting complex I chlorophyll a/b binding protein 1+ko00196//Photosynthesis - antenna proteins;K08907//light-harvesting complex I chlorophyll a/b binding protein 1+ko00196//Photosynthesis - antenna proteins;K08910//light-harvesting complex I chlorophyll a/b binding prot…	Chlorophyll A-B binding protein	XM_005821691.1 Guillardia theta CCMP2712 light-harvesting Chl a protein 4 (Lhcr4) mRNA, complete cds	TPA_inf: chloroplast protein precursor LI818;2 [Mesostigma viride]	[C] LSE0391 A Chlorophyll A/B binding protein	Chlorophyll a-b binding protein L1818, chloroplastic OS=Chlamydomonas moewusii GN=L1818 PE=2 SV=1
CL7440.Contig6_All	572	ko00196//Photosynthesis - antenna proteins	Metabolism	Energy metabolism	-2.39161	0	0	K08907//light-harvesting complex I chlorophyll a/b binding protein 1+ko00196//Photosynthesis - antenna proteins		CP002685.1 Arabidopsis thaliana chromosome 2 sequence	hypothetical protein GPECTOR_17g812 [Gonium pectorale]			GO:0009768//photosynthesis, light harvesting in photosystem I;GO:0009535//chloroplast thylakoid membrane;GO:0009523//photosystem II;GO:0009416//response to light stimulus;GO:0018298//protein-chromophore linkage;GO:0009765//photosynthesis, light harvesting;GO:0031409//pigment binding;GO:0016021//integral component of membrane;GO:0016168//chlorophyll binding;GO:0009522//photosystem I
CL7440.Contig3_All	1256	ko00196//Photosynthesis - antenna proteins;ko01100//Metabolic pathways	Metabolism	Energy metabolism;Global and overview maps	-2.62679	0	0	K08907//light-harvesting complex I chlorophyll a/b binding protein 1+ko00196//Photosynthesis - antenna proteins;K08907//light-harvesting complex I chlorophyll a/b binding protein 1+ko00196//Photosynthesis - antenna proteins;K08912//light-harvesting complex II chlorophyll a/b binding protein 1+ko01100//Metabolic pathways+ko00196//Photosynthesis - antenna proteins;K08912//light-harvesting complex I…	Chlorophyll A-B binding protein		protein fucoxanthin chlorophyll a/c protein [Phaeodactylum tricornutum CCAP 1055/1] >EEC48746.1 protein fucoxanthin chlorophyll a/c protein [Phaeodactylum tricornutum CCAP 1055/1]	[C] LSE0391 A Chlorophyll A/B binding protein	Chlorophyll a-b binding protein L1818, chloroplastic OS=Chlamydomonas moewusii GN=L1818 PE=2 SV=1	GO:0009765//photosynthesis, light harvesting;GO:0009535//chloroplast thylakoid membrane;GO:0016021//integral component of membrane;GO:0016168//chlorophyll binding;GO:0018298//protein-chromophore linkage
CL7440.Contig5_All	1078	ko00196//Photosynthesis - antenna proteins	Metabolism	Energy metabolism	-2.95962	0	0	K08907//light-harvesting complex I chlorophyll a/b binding protein 1+ko00196//Photosynthesis - antenna proteins;K08907//light-harvesting complex I chlorophyll a/b binding protein 1+ko00196//Photosynthesis - antenna proteins;K08907//light-harvesting complex I chlorophyll a/b binding protein 1+ko00196//Photosynthesis - antenna proteins;K08910//light-harvesting complex I chlorophyll a/b binding prot…	Chlorophyll A-B binding protein		fucoxanthin chlorophyll a/c binding protein [Cyclotella cryptica] >CAA04405.1 fucoxanthin chlorophyll a/c binding protein [Cyclotella cryptica] >CAA04406.1 fucoxanthin chlorophyll a/c binding protein [Cyclotella cryptica] >CAA04407.1 fucoxanthin chlorophyll a/c binding protein [Cyclotella cryptica]	[C] LSE0391 A Chlorophyll A/B binding protein	Chlorophyll a-b binding protein L1818, chloroplastic OS=Chlamydomonas moewusii GN=L1818 PE=2 SV=1	GO:0009765//photosynthesis, light harvesting;GO:0009535//chloroplast thylakoid membrane;GO:0016021//integral component of membrane;GO:0016168//chlorophyll binding;GO:0018298//protein-chromophore linkage
CL794.Contig2_All	1132	ko00196//Photosynthesis - antenna proteins	Metabolism	Energy metabolism	-3.38261	1.95633e-25	4.21834e-26	K08907//light-harvesting complex I chlorophyll a/b binding protein 1+ko00196//Photosynthesis - antenna proteins;K08907//light-harvesting complex I chlorophyll a/b binding protein 1+ko00196//Photosynthesis - antenna proteins;K08907//light-harvesting complex I chlorophyll a/b binding protein 1+ko00196//Photosynthesis - antenna proteins;K08907//light-harvesting complex I chlorophyll a/b binding prot…	Chlorophyll A-B binding protein		protein fucoxanthin chlorophyll a/c protein [Phaeodactylum tricornutum CCAP 1055/1] >EEC46516.1 protein fucoxanthin chlorophyll a/c protein [Phaeodactylum tricornutum CCAP 1055/1]	[C] LSE0391 A Chlorophyll A/B binding protein	Chlorophyll a-b binding protein CP26, chloroplastic OS=Arabidopsis thaliana GN=LHCB5 PE=1 SV=1	GO:0009765//photosynthesis, light harvesting;GO:0009535//chloroplast thylakoid membrane;GO:0016021//integral component of membrane;GO:0016168//chlorophyll binding;GO:0018298//protein-chromophore linkage
CL794.Contig10_All	1270	ko00196//Photosynthesis - antenna proteins	Metabolism	Energy metabolism	-3.46456	1.25501e-37	2.06979e-38	K08907//light-harvesting complex I chlorophyll a/b binding protein 1+ko00196//Photosynthesis - antenna proteins;K08907//light-harvesting complex I chlorophyll a/b binding protein 1+ko00196//Photosynthesis - antenna proteins;K08907//light-harvesting complex I chlorophyll a/b binding protein 1+ko00196//Photosynthesis - antenna proteins;K08907//light-harvesting complex I chlorophyll a/b binding prot…	Chlorophyll A-B binding protein		protein fucoxanthin chlorophyll a/c protein, partial [Phaeodactylum tricornutum CCAP 1055/1] >EEC45497.1 protein fucoxanthin chlorophyll a/c protein, partial [Phaeodactylum tricornutum CCAP 1055/1]	[C] LSE0391 A Chlorophyll A/B binding protein	Chlorophyll a-b binding protein CP26, chloroplastic OS=Arabidopsis thaliana GN=LHCB5 PE=1 SV=1	GO:0009765//photosynthesis, light harvesting;GO:0009535//chloroplast thylakoid membrane;GO:0016021//integral component of membrane;GO:0016168//chlorophyll binding;GO:0018298//protein-chromophore linkage
CL794.Contig4_All	1037	ko00196//Photosynthesis - antenna proteins	Metabolism	Energy metabolism	-3.82426	3.56899e-115	2.61785e-116	K08907//light-harvesting complex I chlorophyll a/b binding protein 1+ko00196//Photosynthesis - antenna proteins;K08907//light-harvesting complex I chlorophyll a/b binding protein 1+ko00196//Photosynthesis - antenna proteins;K08907//light-harvesting complex I chlorophyll a/b binding protein 1+ko00196//Photosynthesis - antenna proteins;K08907//light-harvesting complex I chlorophyll a/b binding prot…	Chlorophyll A-B binding protein		protein fucoxanthin chlorophyll a/c protein, partial [Phaeodactylum tricornutum CCAP 1055/1] >EEC45497.1 protein fucoxanthin chlorophyll a/c protein, partial [Phaeodactylum tricornutum CCAP 1055/1]	[C] LSE0391 A Chlorophyll A/B binding protein	Chlorophyll a-b binding protein CP26, chloroplastic OS=Arabidopsis thaliana GN=LHCB5 PE=1 SV=1	GO:0009765//photosynthesis, light harvesting;GO:0009535//chloroplast thylakoid membrane;GO:0016021//integral component of membrane;GO:0016168//chlorophyll binding;GO:0018298//protein-chromophore linkage
Unigene36990_All	1034	ko00196//Photosynthesis - antenna proteins	Metabolism	Energy metabolism	-3.9898	2.85824e-20	7.18749e-21	K08907//light-harvesting complex I chlorophyll a/b binding protein 1+ko00196//Photosynthesis - antenna proteins;K08907//light-harvesting complex I chlorophyll a/b binding protein 1+ko00196//Photosynthesis - antenna proteins;K08907//light-harvesting complex I chlorophyll a/b binding protein 1+ko00196//Photosynthesis - antenna proteins;K08907//light-harvesting complex I chlorophyll a/b binding prot…	Chlorophyll A-B binding protein		protein fucoxanthin chlorophyll a/c protein [Phaeodactylum tricornutum CCAP 1055/1] >EEC46516.1 protein fucoxanthin chlorophyll a/c protein [Phaeodactylum tricornutum CCAP 1055/1]	[C] LSE0391 A Chlorophyll A/B binding protein	Chlorophyll a-b binding protein CP26, chloroplastic OS=Arabidopsis thaliana GN=LHCB5 PE=1 SV=1	GO:0009765//photosynthesis, light harvesting;GO:0009535//chloroplast thylakoid membrane;GO:0016021//integral component of membrane;GO:0016168//chlorophyll binding;GO:0018298//protein-chromophore linkage
CL7440.Contig1_All	1157	ko01100//Metabolic pathways;ko00196//Photosynthesis - antenna proteins	Metabolism	Energy metabolism;Global and overview maps	-4.01264	0	0	K08907//light-harvesting complex I chlorophyll a/b binding protein 1+ko00196//Photosynthesis - antenna proteins;K08907//light-harvesting complex I chlorophyll a/b binding protein 1+ko00196//Photosynthesis - antenna proteins;K08908//light-harvesting complex I chlorophyll a/b binding protein 2+ko00196//Photosynthesis - antenna proteins;K08908//light-harvesting complex I chlorophyll a/b binding prot…	Chlorophyll A-B binding protein		Light harvesting complex protein [Ectocarpus siliculosus]	[C] LSE0391 A Chlorophyll A/B binding protein	Fucoxanthin-chlorophyll a-c binding protein, chloroplastic OS=Isochrysis galbana GN=FCP PE=1 SV=1
CL794.Contig6_All	1135	ko00196//Photosynthesis - antenna proteins	Metabolism	Energy metabolism	-4.25273	9.29758e-54	1.18743e-54	K08907//light-harvesting complex I chlorophyll a/b binding protein 1+ko00196//Photosynthesis - antenna proteins;K08907//light-harvesting complex I chlorophyll a/b binding protein 1+ko00196//Photosynthesis - antenna proteins;K08907//light-harvesting complex I chlorophyll a/b binding protein 1+ko00196//Photosynthesis - antenna proteins;K08907//light-harvesting complex I chlorophyll a/b binding prot…	Chlorophyll A-B binding protein		protein fucoxanthin chlorophyll a/c protein, partial [Phaeodactylum tricornutum CCAP 1055/1] >EEC45497.1 protein fucoxanthin chlorophyll a/c protein, partial [Phaeodactylum tricornutum CCAP 1055/1]	[C] LSE0391 A Chlorophyll A/B binding protein	Chlorophyll a-b binding protein CP26, chloroplastic OS=Arabidopsis thaliana GN=LHCB5 PE=1 SV=1	GO:0009765//photosynthesis, light harvesting;GO:0009535//chloroplast thylakoid membrane;GO:0016021//integral component of membrane;GO:0016168//chlorophyll binding;GO:0018298//protein-chromophore linkage
CL4029.Contig1_All	1207	ko00196//Photosynthesis - antenna proteins	Metabolism	Energy metabolism	-4.40676	6.25218e-267	2.37912e-268	K08907//light-harvesting complex I chlorophyll a/b binding protein 1+ko00196//Photosynthesis - antenna proteins;K08907//light-harvesting complex I chlorophyll a/b binding protein 1+ko00196//Photosynthesis - antenna proteins;K08907//light-harvesting complex I chlorophyll a/b binding protein 1+ko00196//Photosynthesis - antenna proteins;K08910//light-harvesting complex I chlorophyll a/b binding prot…	Chlorophyll A-B binding protein	XM_005821691.1 Guillardia theta CCMP2712 light-harvesting Chl a protein 4 (Lhcr4) mRNA, complete cds	TPA_inf: chloroplast protein precursor LI818;2 [Mesostigma viride]	[C] LSE0391 A Chlorophyll A/B binding protein	Chlorophyll a-b binding protein L1818, chloroplastic OS=Chlamydomonas moewusii GN=L1818 PE=2 SV=1
CL4029.Contig2_All	1183	ko00196//Photosynthesis - antenna proteins;ko01100//Metabolic pathways	Metabolism	Energy metabolism;Global and overview maps	-5.32333	0	0	K08907//light-harvesting complex I chlorophyll a/b binding protein 1+ko00196//Photosynthesis - antenna proteins;K08907//light-harvesting complex I chlorophyll a/b binding protein 1+ko00196//Photosynthesis - antenna proteins;K08907//light-harvesting complex I chlorophyll a/b binding protein 1+ko00196//Photosynthesis - antenna proteins;K08912//light-harvesting complex II chlorophyll a/b binding pro…	Chlorophyll A-B binding protein		Light harvesting complex protein [Ectocarpus siliculosus]	[C] LSE0391 A Chlorophyll A/B binding protein	Fucoxanthin-chlorophyll a-c binding protein, chloroplastic OS=Isochrysis galbana GN=FCP PE=1 SV=1	GO:0009765//photosynthesis, light harvesting;GO:0009535//chloroplast thylakoid membrane;GO:0016021//integral component of membrane;GO:0016168//chlorophyll binding;GO:0018298//protein-chromophore linkage
Unigene36989_All	962	ko00196//Photosynthesis - antenna proteins	Metabolism	Energy metabolism	-6.78949	1.28849e-50	1.71581e-51	K08907//light-harvesting complex I chlorophyll a/b binding protein 1+ko00196//Photosynthesis - antenna proteins;K08907//light-harvesting complex I chlorophyll a/b binding protein 1+ko00196//Photosynthesis - antenna proteins;K08907//light-harvesting complex I chlorophyll a/b binding protein 1+ko00196//Photosynthesis - antenna proteins;K08907//light-harvesting complex I chlorophyll a/b binding prot…	Chlorophyll A-B binding protein		protein fucoxanthin chlorophyll a/c protein [Phaeodactylum tricornutum CCAP 1055/1] >EEC46516.1 protein fucoxanthin chlorophyll a/c protein [Phaeodactylum tricornutum CCAP 1055/1]	[C] LSE0391 A Chlorophyll A/B binding protein	Chlorophyll a-b binding protein CP26, chloroplastic OS=Arabidopsis thaliana GN=LHCB5 PE=1 SV=1	GO:0009765//photosynthesis, light harvesting;GO:0009535//chloroplast thylakoid membrane;GO:0016021//integral component of membrane;GO:0016168//chlorophyll binding;GO:0018298//protein-chromophore linkage
CL794.Contig9_All	1368	ko00196//Photosynthesis - antenna proteins	Metabolism	Energy metabolism	-8.82348	7.47956e-44	1.10011e-44	K08907//light-harvesting complex I chlorophyll a/b binding protein 1+ko00196//Photosynthesis - antenna proteins;K08907//light-harvesting complex I chlorophyll a/b binding protein 1+ko00196//Photosynthesis - antenna proteins;K08907//light-harvesting complex I chlorophyll a/b binding protein 1+ko00196//Photosynthesis - antenna proteins;K08907//light-harvesting complex I chlorophyll a/b binding prot…	Chlorophyll A-B binding protein		protein fucoxanthin chlorophyll a/c protein, partial [Phaeodactylum tricornutum CCAP 1055/1] >EEC45497.1 protein fucoxanthin chlorophyll a/c protein, partial [Phaeodactylum tricornutum CCAP 1055/1]	[C] LSE0391 A Chlorophyll A/B binding protein	Chlorophyll a-b binding protein CP26, chloroplastic OS=Arabidopsis thaliana GN=LHCB5 PE=1 SV=1	GO:0009765//photosynthesis, light harvesting;GO:0009535//chloroplast thylakoid membrane;GO:0016021//integral component of membrane;GO:0016168//chlorophyll binding;GO:0018298//protein-chromophore linkage
CL794.Contig1_All	1019	ko00196//Photosynthesis - antenna proteins	Metabolism	Energy metabolism	-9.0924	6.48905e-51	8.61239e-52	K08907//light-harvesting complex I chlorophyll a/b binding protein 1+ko00196//Photosynthesis - antenna proteins;K08907//light-harvesting complex I chlorophyll a/b binding protein 1+ko00196//Photosynthesis - antenna proteins;K08907//light-harvesting complex I chlorophyll a/b binding protein 1+ko00196//Photosynthesis - antenna proteins;K08907//light-harvesting complex I chlorophyll a/b binding prot…	Chlorophyll A-B binding protein		protein fucoxanthin chlorophyll a/c protein, partial [Phaeodactylum tricornutum CCAP 1055/1] >EEC45497.1 protein fucoxanthin chlorophyll a/c protein, partial [Phaeodactylum tricornutum CCAP 1055/1]	[C] LSE0391 A Chlorophyll A/B binding protein	Chlorophyll a-b binding protein CP26, chloroplastic OS=Arabidopsis thaliana GN=LHCB5 PE=1 SV=1	GO:0009765//photosynthesis, light harvesting;GO:0009535//chloroplast thylakoid membrane;GO:0016021//integral component of membrane;GO:0016168//chlorophyll binding;GO:0018298//protein-chromophore linkage
CL7808.Contig5_All	1594	ko00196//Photosynthesis - antenna proteins	Metabolism	Energy metabolism	-9.96118	7.86781e-82	7.393e-83	K08907//light-harvesting complex I chlorophyll a/b binding protein 1+ko00196//Photosynthesis - antenna proteins;K08907//light-harvesting complex I chlorophyll a/b binding protein 1+ko00196//Photosynthesis - antenna proteins;K08907//light-harvesting complex I chlorophyll a/b binding protein 1+ko00196//Photosynthesis - antenna proteins;K08911//light-harvesting complex I chlorophyll a/b binding prot…	Chlorophyll A-B binding protein		hypothetical protein THAOC_09862 [Thalassiosira oceanica]	[C] LSE0391 A Chlorophyll A/B binding protein	Light-harvesting complex I LH38 proteins (Fragment) OS=Euglena gracilis PE=2 SV=1	GO:0009765//photosynthesis, light harvesting;GO:0009535//chloroplast thylakoid membrane;GO:0016021//integral component of membrane;GO:0016168//chlorophyll binding;GO:0018298//protein-chromophore linkage

## Sheet: Chlorophyll metabolism
Supplementary Table 2:	Differentially expressed genes involved in chlorophyll metabolism
Gene ID	Length	Pathway Name	Level 1	Level 2	log2(He_1000/He_400)	Qvalue(He_400-vs-He_1000)	Pvalue(He_400-vs-He_1000)	Kegg Orthology	Pfam	Nt	Nr	Kog	Swissprot	GO
CL3008.Contig2_All	1735	ko01110//Biosynthesis of secondary metabolites;ko00860//Porphyrin and chlorophyll metabolism;ko01100//Metabolic pathways	Metabolism	Global and overview maps;Metabolism of cofactors and vitamins	2.09263	0	0	K01698//porphobilinogen synthase [EC:4.2.1.24]+ko00860//Porphyrin and chlorophyll metabolism+ko01100//Metabolic pathways+ko01110//Biosynthesis of secondary metabolites;K01698//porphobilinogen synthase [EC:4.2.1.24]+ko00860//Porphyrin and chlorophyll metabolism+ko01100//Metabolic pathways+ko01110//Biosynthesis of secondary metabolites;K01698//porphobilinogen synthase [EC:4.2.1.24]+ko00860//Porphyr…	Delta-aminolevulinic acid dehydratase	AJ310905.1 Odontella sinensis mRNA for ALA dehydratase (hemB gene)	ALA dehydratase [Odontella sinensis]	[H] KOG2794 Delta-aminolevulinic acid dehydratase	Delta-aminolevulinic acid dehydratase, chloroplastic OS=Physcomitrella patens subsp. patens GN=HEMB PE=2 SV=2
Unigene89015_All	511	ko00860//Porphyrin and chlorophyll metabolism	Metabolism	Metabolism of cofactors and vitamins	1.95902	3.75268e-09	1.59917e-09	K19054//frataxin [EC:1.16.3.1]+ko00860//Porphyrin and chlorophyll metabolism;K19054//frataxin [EC:1.16.3.1]+ko00860//Porphyrin and chlorophyll metabolism;K19054//frataxin [EC:1.16.3.1]+ko00860//Porphyrin and chlorophyll metabolism;K19054//frataxin [EC:1.16.3.1]+ko00860//Porphyrin and chlorophyll metabolism	Frataxin-like domain		conserved unknown protein [Ectocarpus siliculosus]	[P] KOG3413 Mitochondrial matrix protein frataxin, involved in Fe/S protein biosynthesis	Frataxin, mitochondrial OS=Arabidopsis thaliana GN=FH PE=1 SV=2	GO:0006879//cellular iron ion homeostasis;GO:0051537//2 iron, 2 sulfur cluster binding;GO:0008199//ferric iron binding;GO:0007005//mitochondrion organization;GO:0034986//iron chaperone activity;GO:0004322//ferroxidase activity;GO:0034599//cellular response to oxidative stress;GO:0018283//iron incorporation into metallo-sulfur cluster;GO:0005739//mitochondrion;GO:0008198//ferrous iron binding
Unigene29819_All	2304	ko01110//Biosynthesis of secondary metabolites;ko00860//Porphyrin and chlorophyll metabolism	Metabolism	Global and overview maps;Metabolism of cofactors and vitamins	1.72806	3.65843e-128	2.50392e-129	K13071//pheophorbide a oxygenase [EC:1.14.15.17]+ko00860//Porphyrin and chlorophyll metabolism+ko01110//Biosynthesis of secondary metabolites	Rieske [2Fe-2S] domain		pheophorbide a oxygenase [Fistulifera solaris]		Pheophorbide a oxygenase, chloroplastic OS=Arabidopsis thaliana GN=PAO PE=1 SV=1	GO:0051537//2 iron, 2 sulfur cluster binding;GO:0010277//chlorophyllide a oxygenase [overall] activity
Unigene23165_All	1988	ko01100//Metabolic pathways;ko01110//Biosynthesis of secondary metabolites;ko00860//Porphyrin and chlorophyll metabolism	Metabolism	Metabolism of cofactors and vitamins;Global and overview maps	1.62201	0	0	K00218//protochlorophyllide reductase [EC:1.3.1.33]+ko00860//Porphyrin and chlorophyll metabolism+ko01100//Metabolic pathways+ko01110//Biosynthesis of secondary metabolites;K00218//protochlorophyllide reductase [EC:1.3.1.33]+ko00860//Porphyrin and chlorophyll metabolism+ko01100//Metabolic pathways+ko01110//Biosynthesis of secondary metabolites;K00218//protochlorophyllide reductase [EC:1.3.1.33]+k…	short chain dehydrogenase		predicted protein [Phaeodactylum tricornutum CCAP 1055/1] >EEC47644.1 predicted protein [Phaeodactylum tricornutum CCAP 1055/1]	[Q] KOG1208 Dehydrogenases with different specificities (related to short-chain alcohol dehydrogenases)	Protochlorophyllide reductase, chloroplastic OS=Marchantia paleacea GN=PORA PE=2 SV=1	GO:0016491//oxidoreductase activity
CL3343.Contig3_All	1007	ko01100//Metabolic pathways;ko00860//Porphyrin and chlorophyll metabolism;ko01110//Biosynthesis of secondary metabolites	Metabolism	Metabolism of cofactors and vitamins;Global and overview maps	1.41405	5.26821e-05	3.31368e-05	K03428//magnesium-protoporphyrin O-methyltransferase [EC:2.1.1.11]+ko00860//Porphyrin and chlorophyll metabolism+ko01100//Metabolic pathways+ko01110//Biosynthesis of secondary metabolites;K03428//magnesium-protoporphyrin O-methyltransferase [EC:2.1.1.11]+ko00860//Porphyrin and chlorophyll metabolism+ko01100//Metabolic pathways+ko01110//Biosynthesis of secondary metabolites;K03428//magnesium-proto…	Magnesium-protoporphyrin IX methyltransferase C-terminus	XM_002499609.1 Micromonas commoda magnesium-protoporphyrin IX methyltransferase chloroplast precursor (CHLM), partial mRNA	magnesium-protoporphyrin O-methyltransferase [Fistulifera solaris]	[H] KOG1270 Methyltransferases	Magnesium protoporphyrin IX methyltransferase, chloroplastic OS=Arabidopsis thaliana GN=CHLM PE=1 SV=1	GO:0015995//chlorophyll biosynthetic process;GO:0046406//magnesium protoporphyrin IX methyltransferase activity
Unigene11250_All	1165	ko00860//Porphyrin and chlorophyll metabolism;ko01110//Biosynthesis of secondary metabolites;ko01100//Metabolic pathways	Metabolism	Metabolism of cofactors and vitamins;Global and overview maps	1.25262	0	0	K21480//heme oxygenase (biliverdin-producing, ferredoxin) [EC:1.14.15.20]+ko00860//Porphyrin and chlorophyll metabolism+ko01100//Metabolic pathways+ko01110//Biosynthesis of secondary metabolites;K21480//heme oxygenase (biliverdin-producing, ferredoxin) [EC:1.14.15.20]+ko00860//Porphyrin and chlorophyll metabolism+ko01100//Metabolic pathways+ko01110//Biosynthesis of secondary metabolites;K21480//h…	Heme oxygenase		heme oxygenase 1 [Chrysochromulina sp. CCMP291]	[P] KOG4480 Heme oxygenase	Heme oxygenase 1, chloroplastic OS=Oryza sativa subsp. japonica GN=HO1 PE=2 SV=1	GO:0010229//inflorescence development;GO:0006788//heme oxidation;GO:0004392//heme oxygenase (decyclizing) activity;GO:0048573//photoperiodism, flowering
Unigene18019_All	2394	ko01110//Biosynthesis of secondary metabolites;ko01100//Metabolic pathways;ko00860//Porphyrin and chlorophyll metabolism	Metabolism	Global and overview maps;Metabolism of cofactors and vitamins	1.16746	7.20182e-20	1.83447e-20	K00228//coproporphyrinogen III oxidase [EC:1.3.3.3]+ko00860//Porphyrin and chlorophyll metabolism+ko01100//Metabolic pathways+ko01110//Biosynthesis of secondary metabolites	Sulfatase	XM_016114527.2 PREDICTED: Arachis duranensis WRKY transcription factor 44 (LOC107493426), transcript variant X1, mRNA	Formylglycine-dependent sulfatase [Ectocarpus siliculosus]	[R] KOG3867 Sulfatase		GO:0008152//metabolic process;GO:0008484//sulfuric ester hydrolase activity
CL3394.Contig4_All	1859	ko01110//Biosynthesis of secondary metabolites;ko00860//Porphyrin and chlorophyll metabolism;ko01100//Metabolic pathways	Metabolism	Global and overview maps;Metabolism of cofactors and vitamins	1.16651	1.42375e-89	1.25622e-90	K01845//glutamate-1-semialdehyde 2,1-aminomutase [EC:5.4.3.8]+ko00860//Porphyrin and chlorophyll metabolism+ko01100//Metabolic pathways+ko01110//Biosynthesis of secondary metabolites;K01845//glutamate-1-semialdehyde 2,1-aminomutase [EC:5.4.3.8]+ko00860//Porphyrin and chlorophyll metabolism+ko01100//Metabolic pathways+ko01110//Biosynthesis of secondary metabolites;K01845//glutamate-1-semialdehyde …	Aminotransferase class-III	KU375790.1 Lepocinclis tripteris plastid glutamate 1-semialdehyde 2,1-aminotransferase mRNA, partial cds; nuclear gene for plastid product	plastid glutamate 1-semialdehyde 2,1-aminotransferase, partial [Eutreptia viridis]	[E] KOG1401 Acetylornithine aminotransferase	Glutamate-1-semialdehyde 2,1-aminomutase, chloroplastic OS=Chlamydomonas reinhardtii GN=GSA PE=2 SV=1
CL10479.Contig1_All	5075	ko00860//Porphyrin and chlorophyll metabolism;ko01110//Biosynthesis of secondary metabolites;ko01100//Metabolic pathways;ko00970//Aminoacyl-tRNA biosynthesis	Metabolism;Genetic Information Processing	Global and overview maps;Metabolism of cofactors and vitamins;Translation	1.05989	6.43805e-31	1.22208e-31	K01885//glutamyl-tRNA synthetase [EC:6.1.1.17]+ko00860//Porphyrin and chlorophyll metabolism+ko00970//Aminoacyl-tRNA biosynthesis+ko01100//Metabolic pathways+ko01110//Biosynthesis of secondary metabolites;K01885//glutamyl-tRNA synthetase [EC:6.1.1.17]+ko00860//Porphyrin and chlorophyll metabolism+ko00970//Aminoacyl-tRNA biosynthesis+ko01100//Metabolic pathways+ko01110//Biosynthesis of secondary m…	tRNA synthetases class I (E and Q), catalytic domain		plus agglutinin [Chlamydomonas reinhardtii]	[J] KOG1149 Glutamyl-tRNA synthetase (mitochondrial)	Glutamate--tRNA ligase, chloroplastic/mitochondrial OS=Nicotiana tabacum PE=2 SV=1
CL6020.Contig7_All	1405	ko01100//Metabolic pathways;ko00860//Porphyrin and chlorophyll metabolism;ko01110//Biosynthesis of secondary metabolites	Metabolism	Global and overview maps;Metabolism of cofactors and vitamins	1.05829	0.000306587	0.000216946	K00228//coproporphyrinogen III oxidase [EC:1.3.3.3]+ko00860//Porphyrin and chlorophyll metabolism+ko01100//Metabolic pathways+ko01110//Biosynthesis of secondary metabolites;K00228//coproporphyrinogen III oxidase [EC:1.3.3.3]+ko00860//Porphyrin and chlorophyll metabolism+ko01100//Metabolic pathways+ko01110//Biosynthesis of secondary metabolites;K00228//coproporphyrinogen III oxidase [EC:1.3.3.3]+k…	Coproporphyrinogen III oxidase	XM_014034798.1 Monoraphidium neglectum coproporphyrinogen III oxidase mRNA	coproporphyrinogen iii oxidase [Chrysochromulina sp. CCMP291]	[H] KOG1518 Coproporphyrinogen III oxidase CPO/HEM13	Oxygen-dependent coproporphyrinogen-III oxidase, chloroplastic OS=Glycine max GN=CPX PE=2 SV=1	GO:0004109//coproporphyrinogen oxidase activity;GO:0006779//porphyrin-containing compound biosynthetic process
Unigene17916_All	6341	ko00860//Porphyrin and chlorophyll metabolism;ko01100//Metabolic pathways;ko01110//Biosynthesis of secondary metabolites	Metabolism	Metabolism of cofactors and vitamins;Global and overview maps	-1.01869	7.96745e-47	1.12476e-47	K01772//protoporphyrin/coproporphyrin ferrochelatase [EC:4.99.1.1 4.99.1.9]+ko00860//Porphyrin and chlorophyll metabolism+ko01100//Metabolic pathways+ko01110//Biosynthesis of secondary metabolites;K01772//protoporphyrin/coproporphyrin ferrochelatase [EC:4.99.1.1 4.99.1.9]+ko00860//Porphyrin and chlorophyll metabolism+ko01100//Metabolic pathways+ko01110//Biosynthesis of secondary metabolites;K0177…	Ferrochelatase		ferrochelatase, partial [Euglena gracilis]	[H] KOG1321 Protoheme ferro-lyase (ferrochelatase)	Ferrochelatase-2, chloroplastic OS=Oryza sativa subsp. indica GN=HEMH PE=2 SV=2	GO:0005739//mitochondrion;GO:0004325//ferrochelatase activity;GO:0006783//heme biosynthetic process
Unigene76795_All	1481	ko01110//Biosynthesis of secondary metabolites;ko00860//Porphyrin and chlorophyll metabolism;ko01100//Metabolic pathways	Metabolism	Global and overview maps;Metabolism of cofactors and vitamins	-1.1478	5.71768e-15	1.76577e-15	K01772//protoporphyrin/coproporphyrin ferrochelatase [EC:4.99.1.1 4.99.1.9]+ko00860//Porphyrin and chlorophyll metabolism+ko01100//Metabolic pathways+ko01110//Biosynthesis of secondary metabolites;K01772//protoporphyrin/coproporphyrin ferrochelatase [EC:4.99.1.1 4.99.1.9]+ko00860//Porphyrin and chlorophyll metabolism+ko01100//Metabolic pathways+ko01110//Biosynthesis of secondary metabolites;K0177…	Ferrochelatase	XM_014039372.1 Monoraphidium neglectum ferrochelatase mRNA	ferrochelatase [Nannochloropsis gaditana]	[H] KOG1321 Protoheme ferro-lyase (ferrochelatase)	Ferrochelatase-2, chloroplastic OS=Arabidopsis thaliana GN=FC2 PE=1 SV=1	GO:0005739//mitochondrion;GO:0004325//ferrochelatase activity;GO:0006783//heme biosynthetic process
Unigene41245_All	1560	ko00860//Porphyrin and chlorophyll metabolism;ko01110//Biosynthesis of secondary metabolites	Metabolism	Global and overview maps;Metabolism of cofactors and vitamins	-1.15098	1.61419e-52	2.09271e-53	K13071//pheophorbide a oxygenase [EC:1.14.15.17]+ko00860//Porphyrin and chlorophyll metabolism+ko01110//Biosynthesis of secondary metabolites;K13071//pheophorbide a oxygenase [EC:1.14.15.17]+ko00860//Porphyrin and chlorophyll metabolism+ko01110//Biosynthesis of secondary metabolites;K13071//pheophorbide a oxygenase [EC:1.14.15.17]+ko00860//Porphyrin and chlorophyll metabolism+ko01110//Biosynthesi…	Pheophorbide a oxygenase		hypothetical protein GUITHDRAFT_159336 [Guillardia theta CCMP2712] >EKX51208.1 hypothetical protein GUITHDRAFT_159336 [Guillardia theta CCMP2712]	[AR] KOG2146 Splicing coactivator SRm160/300, subunit SRm160 (contains PWI domain)	Alpha carbonic anhydrase 8 OS=Arabidopsis thaliana GN=ACA8 PE=3 SV=3	GO:0051537//2 iron, 2 sulfur cluster binding;GO:0010277//chlorophyllide a oxygenase [overall] activity;GO:0019031//viral envelope;GO:0016021//integral component of membrane
Unigene40776_All	3035	ko01110//Biosynthesis of secondary metabolites;ko00190//Oxidative phosphorylation;ko01100//Metabolic pathways;ko00860//Porphyrin and chlorophyll metabolism	Metabolism	Global and overview maps;Energy metabolism;Metabolism of cofactors and vitamins	-1.29657	1.2198e-38	1.96681e-39	K02257//heme o synthase [EC:2.5.1.141]+ko00860//Porphyrin and chlorophyll metabolism+ko01100//Metabolic pathways+ko00190//Oxidative phosphorylation+ko01110//Biosynthesis of secondary metabolites;K02257//heme o synthase [EC:2.5.1.141]+ko00860//Porphyrin and chlorophyll metabolism+ko01100//Metabolic pathways+ko00190//Oxidative phosphorylation+ko01110//Biosynthesis of secondary metabolites;K02257//h…	UbiA prenyltransferase family		protoheme IX farnesyltransferase [Monoraphidium neglectum] >KIY93611.1 protoheme IX farnesyltransferase [Monoraphidium neglectum]	[H] KOG1380 Heme A farnesyltransferase	Cytochrome c oxidase subunit 3 OS=Marchantia polymorpha GN=COX3 PE=3 SV=2	GO:0016021//integral component of membrane;GO:0031966//mitochondrial membrane;GO:0008495//protoheme IX farnesyltransferase activity;GO:0048034//heme O biosynthetic process
Unigene11611_All	5893	ko03015//mRNA surveillance pathway;ko00860//Porphyrin and chlorophyll metabolism;ko03013//RNA transport;ko01110//Biosynthesis of secondary metabolites;ko01100//Metabolic pathways	Genetic Information Processing;Metabolism	Metabolism of cofactors and vitamins;Global and overview maps;Translation	-1.32593	8.95173e-304	3.03909e-305	K22857//EEF1A lysine methyltransferase 4 [EC:2.1.1.-];K19073//divinyl chlorophyllide a 8-vinyl-reductase [EC:1.3.1.75]+ko00860//Porphyrin and chlorophyll metabolism+ko01100//Metabolic pathways+ko01110//Biosynthesis of secondary metabolites;K13171//serine/arginine repetitive matrix protein 1+ko03015//mRNA surveillance pathway+ko03013//RNA transport;K19073//divinyl chlorophyllide a 8-vinyl-reductas…	NAD(P)H-binding		predicted protein [Micromonas commoda] >ACO60679.1 predicted protein [Micromonas commoda]	[G] KOG1203 Predicted dehydrogenase	Uncharacterized protein ycf39 OS=Cyanophora paradoxa GN=ycf39 PE=3 SV=1	GO:0016021//integral component of membrane
Unigene32596_All	1305	ko01110//Biosynthesis of secondary metabolites;ko01100//Metabolic pathways;ko00860//Porphyrin and chlorophyll metabolism;ko00970//Aminoacyl-tRNA biosynthesis	Genetic Information Processing;Metabolism	Global and overview maps;Metabolism of cofactors and vitamins;Translation	-1.41773	3.68564e-05	2.28186e-05	K01885//glutamyl-tRNA synthetase [EC:6.1.1.17]+ko00860//Porphyrin and chlorophyll metabolism+ko00970//Aminoacyl-tRNA biosynthesis+ko01100//Metabolic pathways+ko01110//Biosynthesis of secondary metabolites;K01885//glutamyl-tRNA synthetase [EC:6.1.1.17]+ko00860//Porphyrin and chlorophyll metabolism+ko00970//Aminoacyl-tRNA biosynthesis+ko01100//Metabolic pathways+ko01110//Biosynthesis of secondary m…	tRNA synthetases class I (E and Q), catalytic domain		glutamate-tRNA ligase [Aphanomyces invadans] >ETW00374.1 glutamate-tRNA ligase [Aphanomyces invadans]	[J] KOG1149 Glutamyl-tRNA synthetase (mitochondrial)	Glutamate--tRNA ligase, chloroplastic/mitochondrial OS=Nicotiana tabacum PE=2 SV=1	GO:0005524//ATP binding;GO:0006424//glutamyl-tRNA aminoacylation;GO:0008270//zinc ion binding;GO:0000049//tRNA binding;GO:0005737//cytoplasm;GO:0004818//glutamate-tRNA ligase activity
CL9580.Contig2_All	1829	ko00860//Porphyrin and chlorophyll metabolism;ko01110//Biosynthesis of secondary metabolites	Metabolism	Global and overview maps;Metabolism of cofactors and vitamins	-2.37883	2.83386e-187	1.43116e-188	K08101//phytochromobilin:ferredoxin oxidoreductase [EC:1.3.7.4]+ko00860//Porphyrin and chlorophyll metabolism+ko01110//Biosynthesis of secondary metabolites	Ferredoxin-dependent bilin reductase		conserved unknown protein (Partial), partial [Ectocarpus siliculosus]			GO:0010024//phytochromobilin biosynthetic process;GO:0050617//15,16-dihydrobiliverdin:ferredoxin oxidoreductase activity;GO:0016636//oxidoreductase activity, acting on the CH-CH group of donors, iron-sulfur protein as acceptor;GO:0050897//cobalt ion binding
Unigene1976_All	914	ko00860//Porphyrin and chlorophyll metabolism;ko01100//Metabolic pathways;ko01110//Biosynthesis of secondary metabolites	Metabolism	Metabolism of cofactors and vitamins;Global and overview maps	-2.41292	3.55328e-08	1.6264e-08	K01772//protoporphyrin/coproporphyrin ferrochelatase [EC:4.99.1.1 4.99.1.9]+ko00860//Porphyrin and chlorophyll metabolism+ko01100//Metabolic pathways+ko01110//Biosynthesis of secondary metabolites;K01772//protoporphyrin/coproporphyrin ferrochelatase [EC:4.99.1.1 4.99.1.9]+ko00860//Porphyrin and chlorophyll metabolism+ko01100//Metabolic pathways+ko01110//Biosynthesis of secondary metabolites;K0177…	Ferrochelatase		ferrochelatase, partial [Euglena gracilis]	[H] KOG1321 Protoheme ferro-lyase (ferrochelatase)	Ferrochelatase-2, chloroplastic OS=Oryza sativa subsp. japonica GN=Os05g0361200 PE=2 SV=1	GO:0005739//mitochondrion;GO:0004325//ferrochelatase activity;GO:0006783//heme biosynthetic process
Unigene26087_All	1564	ko00860//Porphyrin and chlorophyll metabolism;ko01100//Metabolic pathways;ko01110//Biosynthesis of secondary metabolites	Metabolism	Metabolism of cofactors and vitamins;Global and overview maps	-2.5924	1.56739e-16	4.54387e-17	K01698//porphobilinogen synthase [EC:4.2.1.24]+ko00860//Porphyrin and chlorophyll metabolism+ko01100//Metabolic pathways+ko01110//Biosynthesis of secondary metabolites;K01698//porphobilinogen synthase [EC:4.2.1.24]+ko00860//Porphyrin and chlorophyll metabolism+ko01100//Metabolic pathways+ko01110//Biosynthesis of secondary metabolites;K01698//porphobilinogen synthase [EC:4.2.1.24]+ko00860//Porphyr…	Delta-aminolevulinic acid dehydratase		delta-aminolevulinic acid dehydratase (porphobilinogen synthase) [Dorcoceras hygrometricum]	[H] KOG2794 Delta-aminolevulinic acid dehydratase	Delta-aminolevulinic acid dehydratase, chloroplastic OS=Chlamydomonas reinhardtii GN=HEMB PE=2 SV=1	GO:0005829//cytosol;GO:0008270//zinc ion binding;GO:0004655//porphobilinogen synthase activity;GO:0006783//heme biosynthetic process
Unigene42506_All	1289	ko01100//Metabolic pathways;ko00860//Porphyrin and chlorophyll metabolism;ko01212//Fatty acid metabolism;ko01040//Biosynthesis of unsaturated fatty acids;ko00062//Fatty acid elongation;ko01110//Biosynthesis of secondary metabolites	Metabolism	Lipid metabolism;Global and overview maps;Metabolism of cofactors and vitamins	-2.78164	1.43391e-08	6.37352e-09	K22970//17beta-estradiol 17-dehydrogenase / 3beta-hydroxysteroid 3-dehydrogenase [EC:1.1.1.62 1.1.1.270];K10251//17beta-estradiol 17-dehydrogenase / very-long-chain 3-oxoacyl-CoA reductase [EC:1.1.1.62 1.1.1.330]+ko01100//Metabolic pathways+ko01110//Biosynthesis of secondary metabolites+ko00062//Fatty acid elongation+ko01212//Fatty acid metabolism+ko01040//Biosynthesis of unsaturated fatty acids;…	Aldo/keto reductase family		putative oxidoreductase ycsn [Nannochloropsis gaditana]	[R] KOG0725 Reductases with broad range of substrate specificities	Probable aldo-keto reductase 1 OS=Glycine max GN=AKR1 PE=2 SV=1
Unigene42308_All	1550	ko01110//Biosynthesis of secondary metabolites;ko00906//Carotenoid biosynthesis;ko00860//Porphyrin and chlorophyll metabolism;ko01100//Metabolic pathways	Metabolism	Metabolism of cofactors and vitamins;Global and overview maps;Metabolism of terpenoids and polyketides	-3.02309	1.10133e-22	2.55993e-23	K15745//phytoene desaturase (3,4-didehydrolycopene-forming) [EC:1.3.99.30]+ko00906//Carotenoid biosynthesis+ko01100//Metabolic pathways+ko01110//Biosynthesis of secondary metabolites;K00231//protoporphyrinogen/coproporphyrinogen III oxidase [EC:1.3.3.4 1.3.3.15]+ko00860//Porphyrin and chlorophyll metabolism+ko01100//Metabolic pathways+ko01110//Biosynthesis of secondary metabolites	NAD(P)-binding Rossmann-like domain		hypothetical protein GUITHDRAFT_116060 [Guillardia theta CCMP2712] >EKX37753.1 hypothetical protein GUITHDRAFT_116060 [Guillardia theta CCMP2712]		Protoporphyrinogen oxidase, chloroplastic/mitochondrial OS=Spinacia oleracea GN=POX2 PE=1 SV=1	GO:0016021//integral component of membrane;GO:0016117//carotenoid biosynthetic process;GO:0016491//oxidoreductase activity
Unigene44672_All	3152	ko00190//Oxidative phosphorylation;ko00860//Porphyrin and chlorophyll metabolism;ko01110//Biosynthesis of secondary metabolites;ko01100//Metabolic pathways	Metabolism	Energy metabolism;Metabolism of cofactors and vitamins;Global and overview maps	-3.09028	0	0	K02259//cytochrome c oxidase assembly protein subunit 15+ko00860//Porphyrin and chlorophyll metabolism+ko01100//Metabolic pathways+ko00190//Oxidative phosphorylation+ko01110//Biosynthesis of secondary metabolites;K02259//cytochrome c oxidase assembly protein subunit 15+ko00860//Porphyrin and chlorophyll metabolism+ko01100//Metabolic pathways+ko00190//Oxidative phosphorylation+ko01110//Biosynthesi…	Cytochrome oxidase assembly protein		predicted protein [Hordeum vulgare subsp. vulgare] >BAK03513.1 predicted protein [Hordeum vulgare subsp. vulgare]	[O] KOG2725 Cytochrome oxidase assembly factor COX15	Cytochrome c oxidase assembly protein COX15 OS=Arabidopsis thaliana GN=COX15 PE=2 SV=1	GO:0016627//oxidoreductase activity, acting on the CH-CH group of donors;GO:0006784//heme a biosynthetic process;GO:0005743//mitochondrial inner membrane;GO:0016021//integral component of membrane
Unigene19399_All	1493	ko01110//Biosynthesis of secondary metabolites;ko01100//Metabolic pathways;ko00860//Porphyrin and chlorophyll metabolism	Metabolism	Metabolism of cofactors and vitamins;Global and overview maps	-3.5763	1.6488e-78	1.59672e-79	K01845//glutamate-1-semialdehyde 2,1-aminomutase [EC:5.4.3.8]+ko00860//Porphyrin and chlorophyll metabolism+ko01100//Metabolic pathways+ko01110//Biosynthesis of secondary metabolites;K01845//glutamate-1-semialdehyde 2,1-aminomutase [EC:5.4.3.8]+ko00860//Porphyrin and chlorophyll metabolism+ko01100//Metabolic pathways+ko01110//Biosynthesis of secondary metabolites;K01845//glutamate-1-semialdehyde …	Mannosyl-glycoprotein endo-beta-N-acetylglucosaminidase		PREDICTED: glutamate-1-semialdehyde 2,1-aminomutase 2, chloroplastic isoform X1 [Gossypium raimondii] >KJB19787.1 hypothetical protein B456_003G119100 [Gossypium raimondii]	[E] KOG1401 Acetylornithine aminotransferase	Glutamate-1-semialdehyde 2,1-aminomutase, chloroplastic OS=Hordeum vulgare GN=GSA PE=1 SV=3	GO:0033014//tetrapyrrole biosynthetic process;GO:0008483//transaminase activity;GO:0042286//glutamate-1-semialdehyde 2,1-aminomutase activity;GO:0030170//pyridoxal phosphate binding
Unigene58582_All	928	ko01100//Metabolic pathways;ko01110//Biosynthesis of secondary metabolites;ko00970//Aminoacyl-tRNA biosynthesis;ko00860//Porphyrin and chlorophyll metabolism	Genetic Information Processing;Metabolism	Metabolism of cofactors and vitamins;Translation;Global and overview maps	-3.67826	3.22417e-11	1.20224e-11	K01885//glutamyl-tRNA synthetase [EC:6.1.1.17]+ko00860//Porphyrin and chlorophyll metabolism+ko00970//Aminoacyl-tRNA biosynthesis+ko01100//Metabolic pathways+ko01110//Biosynthesis of secondary metabolites;K01885//glutamyl-tRNA synthetase [EC:6.1.1.17]+ko00860//Porphyrin and chlorophyll metabolism+ko00970//Aminoacyl-tRNA biosynthesis+ko01100//Metabolic pathways+ko01110//Biosynthesis of secondary m…	tRNA synthetases class I (E and Q), catalytic domain		glutamate--tRNA ligase 2 [Ostreococcus tauri]	[J] KOG1149 Glutamyl-tRNA synthetase (mitochondrial)	Glutamine--tRNA ligase, cytoplasmic OS=Arabidopsis thaliana GN=OVA9 PE=2 SV=1	GO:0005524//ATP binding;GO:0006424//glutamyl-tRNA aminoacylation;GO:0008270//zinc ion binding;GO:0000049//tRNA binding;GO:0009536//plastid;GO:0005737//cytoplasm;GO:0004818//glutamate-tRNA ligase activity
Unigene31701_All	500	ko00860//Porphyrin and chlorophyll metabolism;ko01110//Biosynthesis of secondary metabolites;ko01100//Metabolic pathways	Metabolism	Global and overview maps;Metabolism of cofactors and vitamins	-4.12187	6.4051e-05	4.08984e-05	K03403//magnesium chelatase subunit H [EC:6.6.1.1]+ko00860//Porphyrin and chlorophyll metabolism+ko01100//Metabolic pathways+ko01110//Biosynthesis of secondary metabolites;K03403//magnesium chelatase subunit H [EC:6.6.1.1]+ko00860//Porphyrin and chlorophyll metabolism+ko01100//Metabolic pathways+ko01110//Biosynthesis of secondary metabolites;K03403//magnesium chelatase subunit H [EC:6.6.1.1]+ko00…	CobN/Magnesium Chelatase		Magnesium chelatase subunit H, putative chloroplast precursor [Ectocarpus siliculosus]		Magnesium-chelatase subunit ChlH, chloroplastic OS=Oryza sativa subsp. indica GN=CHLH PE=3 SV=1	GO:0009058//biosynthetic process;GO:0016851//magnesium chelatase activity;GO:0015995//chlorophyll biosynthetic process
Unigene24599_All	811	ko01100//Metabolic pathways;ko01110//Biosynthesis of secondary metabolites;ko00860//Porphyrin and chlorophyll metabolism	Metabolism	Metabolism of cofactors and vitamins;Global and overview maps	-4.35633	4.2573e-10	1.70435e-10	K02492//glutamyl-tRNA reductase [EC:1.2.1.70]+ko00860//Porphyrin and chlorophyll metabolism+ko01100//Metabolic pathways+ko01110//Biosynthesis of secondary metabolites;K02492//glutamyl-tRNA reductase [EC:1.2.1.70]+ko00860//Porphyrin and chlorophyll metabolism+ko01100//Metabolic pathways+ko01110//Biosynthesis of secondary metabolites;K02492//glutamyl-tRNA reductase [EC:1.2.1.70]+ko00860//Porphyrin …	Glutamyl-tRNAGlu reductase, N-terminal domain		glutamyl-tRNA reductase (cyanelle) [Cyanophora paradoxa]	[J] LSE1622 A Glutamyl-tRNA reductase	Probable glutamyl-tRNA reductase 3, chloroplastic OS=Arabidopsis thaliana GN=HEMA3 PE=3 SV=1	GO:0050661//NADP binding;GO:0008883//glutamyl-tRNA reductase activity;GO:0006782//protoporphyrinogen IX biosynthetic process;GO:0009842//cyanelle;GO:0015995//chlorophyll biosynthetic process
Unigene68117_All	2105	ko01110//Biosynthesis of secondary metabolites;ko00190//Oxidative phosphorylation;ko01100//Metabolic pathways;ko00860//Porphyrin and chlorophyll metabolism	Metabolism	Global and overview maps;Metabolism of cofactors and vitamins;Energy metabolism	-4.41292	2.3511e-24	5.21756e-25	K02259//cytochrome c oxidase assembly protein subunit 15+ko00860//Porphyrin and chlorophyll metabolism+ko01100//Metabolic pathways+ko00190//Oxidative phosphorylation+ko01110//Biosynthesis of secondary metabolites;K02259//cytochrome c oxidase assembly protein subunit 15+ko00860//Porphyrin and chlorophyll metabolism+ko01100//Metabolic pathways+ko00190//Oxidative phosphorylation+ko01110//Biosynthesi…	Cytochrome oxidase assembly protein		cytochrome c oxidase assembly protein COX15-like isoform X1 [Asparagus officinalis]	[O] KOG2725 Cytochrome oxidase assembly factor COX15	Cytochrome c oxidase assembly protein COX15 OS=Arabidopsis thaliana GN=COX15 PE=2 SV=1
Unigene38738_All	5573	ko00860//Porphyrin and chlorophyll metabolism;ko01100//Metabolic pathways;ko01110//Biosynthesis of secondary metabolites;ko00910//Nitrogen metabolism	Metabolism	Energy metabolism;Global and overview maps;Metabolism of cofactors and vitamins	-4.41852	1.84791e-196	8.95328e-198	K02303//uroporphyrin-III C-methyltransferase [EC:2.1.1.107]+ko00860//Porphyrin and chlorophyll metabolism+ko01100//Metabolic pathways+ko01110//Biosynthesis of secondary metabolites;K02303//uroporphyrin-III C-methyltransferase [EC:2.1.1.107]+ko00860//Porphyrin and chlorophyll metabolism+ko01100//Metabolic pathways+ko01110//Biosynthesis of secondary metabolites;K02303//uroporphyrin-III C-methyltran…	Nitrite and sulphite reductase 4Fe-4S domain		uncharacterized protein LOC109794706, partial [Cajanus cajan]	[H] KOG1527 Uroporphyrin III methyltransferase	Uroporphyrinogen-III C-methyltransferase OS=Cyanidium caldarium GN=cobA PE=3 SV=1	GO:0008168//methyltransferase activity;GO:0055114//oxidation-reduction process;GO:0006779//porphyrin-containing compound biosynthetic process
Unigene70153_All	919	ko00860//Porphyrin and chlorophyll metabolism;ko01110//Biosynthesis of secondary metabolites;ko01100//Metabolic pathways	Metabolism	Metabolism of cofactors and vitamins;Global and overview maps	-4.49384	3.34771e-06	1.8392e-06	K01749//hydroxymethylbilane synthase [EC:2.5.1.61]+ko00860//Porphyrin and chlorophyll metabolism+ko01100//Metabolic pathways+ko01110//Biosynthesis of secondary metabolites;K01749//hydroxymethylbilane synthase [EC:2.5.1.61]+ko00860//Porphyrin and chlorophyll metabolism+ko01100//Metabolic pathways+ko01110//Biosynthesis of secondary metabolites;K01749//hydroxymethylbilane synthase [EC:2.5.1.61]+ko00…	Porphobilinogen deaminase, dipyromethane cofactor binding domain		plastid porphobilinogen deaminase, partial [Eutreptiella braarudii]	[H] KOG2892 Porphobilinogen deaminase	Porphobilinogen deaminase, chloroplastic OS=Euglena gracilis PE=1 SV=1
Unigene65145_All	454	ko01110//Biosynthesis of secondary metabolites;ko00860//Porphyrin and chlorophyll metabolism;ko01100//Metabolic pathways	Metabolism	Global and overview maps;Metabolism of cofactors and vitamins	-4.61937	0.000536232	0.000394685	K01845//glutamate-1-semialdehyde 2,1-aminomutase [EC:5.4.3.8]+ko00860//Porphyrin and chlorophyll metabolism+ko01100//Metabolic pathways+ko01110//Biosynthesis of secondary metabolites;K01845//glutamate-1-semialdehyde 2,1-aminomutase [EC:5.4.3.8]+ko00860//Porphyrin and chlorophyll metabolism+ko01100//Metabolic pathways+ko01110//Biosynthesis of secondary metabolites;K01845//glutamate-1-semialdehyde …	Aminotransferase class-III	NM_001345595.1 Arabidopsis thaliana glutamate-1-semialdehyde-2,1-aminomutase (GSA1), mRNA	PREDICTED: glutamate-1-semialdehyde 2,1-aminomutase, chloroplastic-like [Ipomoea nil]	[E] KOG1401 Acetylornithine aminotransferase	Glutamate-1-semialdehyde 2,1-aminomutase, chloroplastic OS=Glycine max GN=GSA1 PE=2 SV=1
Unigene86129_All	497	ko00860//Porphyrin and chlorophyll metabolism;ko01110//Biosynthesis of secondary metabolites;ko00190//Oxidative phosphorylation;ko01100//Metabolic pathways	Metabolism	Energy metabolism;Metabolism of cofactors and vitamins;Global and overview maps	-4.84176	0.000167012	0.00011332	K02259//cytochrome c oxidase assembly protein subunit 15+ko00860//Porphyrin and chlorophyll metabolism+ko01100//Metabolic pathways+ko00190//Oxidative phosphorylation+ko01110//Biosynthesis of secondary metabolites;K02259//cytochrome c oxidase assembly protein subunit 15+ko00860//Porphyrin and chlorophyll metabolism+ko01100//Metabolic pathways+ko00190//Oxidative phosphorylation+ko01110//Biosynthesi…	Cytochrome oxidase assembly protein		PREDICTED: cytochrome c oxidase assembly protein COX15 [Fragaria vesca subsp. vesca]	[O] KOG2725 Cytochrome oxidase assembly factor COX15	Cytochrome c oxidase assembly protein COX15 OS=Arabidopsis thaliana GN=COX15 PE=2 SV=1	GO:0016627//oxidoreductase activity, acting on the CH-CH group of donors;GO:0006784//heme a biosynthetic process;GO:0016021//integral component of membrane
Unigene30938_All	2298	ko01100//Metabolic pathways;ko01110//Biosynthesis of secondary metabolites;ko00860//Porphyrin and chlorophyll metabolism	Metabolism	Metabolism of cofactors and vitamins;Global and overview maps	-4.96356	1.79043e-107	1.38746e-108	K03403//magnesium chelatase subunit H [EC:6.6.1.1]+ko00860//Porphyrin and chlorophyll metabolism+ko01100//Metabolic pathways+ko01110//Biosynthesis of secondary metabolites;K03403//magnesium chelatase subunit H [EC:6.6.1.1]+ko00860//Porphyrin and chlorophyll metabolism+ko01100//Metabolic pathways+ko01110//Biosynthesis of secondary metabolites;K03403//magnesium chelatase subunit H [EC:6.6.1.1]+ko00…	CobN/Magnesium Chelatase	XM_001697307.1 Chlamydomonas reinhardtii magnesium chelatase subunit H (CHLH2), partial mRNA	magnesium-chelatase H subunit [Klebsormidium nitens]		Magnesium-chelatase subunit ChlH, chloroplastic OS=Oryza sativa subsp. indica GN=CHLH PE=3 SV=1	GO:0009058//biosynthetic process;GO:0016851//magnesium chelatase activity
Unigene25326_All	942	ko01100//Metabolic pathways;ko00860//Porphyrin and chlorophyll metabolism	Metabolism	Global and overview maps;Metabolism of cofactors and vitamins	-5.42672	4.11879e-21	1.00732e-21	K00798//cob(I)alamin adenosyltransferase [EC:2.5.1.17]+ko00860//Porphyrin and chlorophyll metabolism+ko01100//Metabolic pathways;K00798//cob(I)alamin adenosyltransferase [EC:2.5.1.17]+ko00860//Porphyrin and chlorophyll metabolism+ko01100//Metabolic pathways	Cobalamin adenosyltransferase		cob(I)alamin adenosyltransferase [Klebsormidium nitens]			GO:0016740//transferase activity
Unigene43088_All	718	ko01110//Biosynthesis of secondary metabolites;ko01100//Metabolic pathways;ko00860//Porphyrin and chlorophyll metabolism	Metabolism	Metabolism of cofactors and vitamins;Global and overview maps	-5.49384	1.76295e-06	9.3908e-07	K03403//magnesium chelatase subunit H [EC:6.6.1.1]+ko00860//Porphyrin and chlorophyll metabolism+ko01100//Metabolic pathways+ko01110//Biosynthesis of secondary metabolites;K03403//magnesium chelatase subunit H [EC:6.6.1.1]+ko00860//Porphyrin and chlorophyll metabolism+ko01100//Metabolic pathways+ko01110//Biosynthesis of secondary metabolites;K03403//magnesium chelatase subunit H [EC:6.6.1.1]+ko00…	Domain of unknown function (DUF3479)		hypothetical protein CEUSTIGMA_g4262.t1 [Chlamydomonas eustigma]			GO:0009058//biosynthetic process;GO:0016851//magnesium chelatase activity
CL7015.Contig2_All	1390	ko01100//Metabolic pathways;ko01110//Biosynthesis of secondary metabolites;ko00860//Porphyrin and chlorophyll metabolism	Metabolism	Global and overview maps;Metabolism of cofactors and vitamins	-7.06562	4.12214e-16	1.21549e-16	K01772//protoporphyrin/coproporphyrin ferrochelatase [EC:4.99.1.1 4.99.1.9]+ko00860//Porphyrin and chlorophyll metabolism+ko01100//Metabolic pathways+ko01110//Biosynthesis of secondary metabolites;K01772//protoporphyrin/coproporphyrin ferrochelatase [EC:4.99.1.1 4.99.1.9]+ko00860//Porphyrin and chlorophyll metabolism+ko01100//Metabolic pathways+ko01110//Biosynthesis of secondary metabolites;K0177…	Ferrochelatase		ferrochelatase, putative, partial [Ricinus communis]	[H] KOG1321 Protoheme ferro-lyase (ferrochelatase)	Ferrochelatase-2, chloroplastic OS=Oryza sativa subsp. japonica GN=Os05g0361200 PE=2 SV=1	GO:0005739//mitochondrion;GO:0004325//ferrochelatase activity;GO:0006783//heme biosynthetic process

## Sheet: Oxidative phosphorylation
Supplementary Table 2:	Differentially expressed genes involved in oxidative phosphorylation metabolism
Gene ID	Length	Pathway Name	Level 1	Level 2	log2(He_1000/He_400)	Qvalue(He_400-vs-He_1000)	Pvalue(He_400-vs-He_1000)	Kegg Orthology	Pfam	Nt	Nr	Kog	Swissprot	GO
CL10890.Contig2_All	987	ko01100//Metabolic pathways;ko00190//Oxidative phosphorylation	Metabolism	Global and overview maps;Energy metabolism	6.90952	4.87092e-15	1.49908e-15	K00417//ubiquinol-cytochrome c reductase subunit 7+ko01100//Metabolic pathways+ko00190//Oxidative phosphorylation	Uncharacterized conserved protein (DUF2358)		hypothetical protein KFL_004590030 [Klebsormidium nitens]
Unigene47225_All	1083	ko00190//Oxidative phosphorylation;ko00195//Photosynthesis;ko01100//Metabolic pathways	Metabolism	Energy metabolism;Global and overview maps	2.07412	1.05275e-08	4.627e-09	K02115//F-type H+-transporting ATPase subunit gamma+ko01100//Metabolic pathways+ko00190//Oxidative phosphorylation+ko00195//Photosynthesis;K02115//F-type H+-transporting ATPase subunit gamma+ko01100//Metabolic pathways+ko00190//Oxidative phosphorylation+ko00195//Photosynthesis;K02115//F-type H+-transporting ATPase subunit gamma+ko01100//Metabolic pathways+ko00190//Oxidative phosphorylation+ko0019…	ATP synthase		ATP synthase [Thalassiosira pseudonana CCMP1335] >EED92675.1 ATP synthase [Thalassiosira pseudonana CCMP1335]	[C] KOG1531 F0F1-type ATP synthase, gamma subunit	ATP synthase gamma chain, chloroplastic OS=Odontella sinensis GN=ATPC PE=1 SV=1	GO:0015986//ATP synthesis coupled proton transport;GO:0045261//proton-transporting ATP synthase complex, catalytic core F(1);GO:0046933//proton-transporting ATP synthase activity, rotational mechanism
Unigene5920_All	1201	ko00190//Oxidative phosphorylation;ko01100//Metabolic pathways	Metabolism	Energy metabolism;Global and overview maps	1.70939	9.92886e-47	1.40305e-47	K00417//ubiquinol-cytochrome c reductase subunit 7+ko01100//Metabolic pathways+ko00190//Oxidative phosphorylation	Uncharacterized conserved protein (DUF2358)		Uncharacterized protein family CreA [Nannochloropsis gaditana]
Unigene17493_All	770	ko00190//Oxidative phosphorylation;ko01100//Metabolic pathways	Metabolism	Energy metabolism;Global and overview maps	1.63545	0.000525122	0.000384047	K02133//F-type H+-transporting ATPase subunit beta [EC:7.1.2.2]+ko01100//Metabolic pathways+ko00190//Oxidative phosphorylation;K02133//F-type H+-transporting ATPase subunit beta [EC:7.1.2.2]+ko01100//Metabolic pathways+ko00190//Oxidative phosphorylation;K02133//F-type H+-transporting ATPase subunit beta [EC:7.1.2.2]+ko01100//Metabolic pathways+ko00190//Oxidative phosphorylation;K02133//F-type H+-…	ATP synthase alpha/beta family, nucleotide-binding domain	XM_002296005.1 Thalassiosira pseudonana CCMP1335 F-type H-ATPase beta subunit mRNA	hypothetical protein THAOC_27647 [Thalassiosira oceanica]	[C] KOG1350 F0F1-type ATP synthase, beta subunit	ATP synthase subunit beta, mitochondrial OS=Hevea brasiliensis GN=ATPB PE=2 SV=1	GO:0015986//ATP synthesis coupled proton transport;GO:0045261//proton-transporting ATP synthase complex, catalytic core F(1);GO:0005524//ATP binding;GO:0046933//proton-transporting ATP synthase activity, rotational mechanism
Unigene42475_All	555	ko04145//Phagosome;ko01100//Metabolic pathways;ko00190//Oxidative phosphorylation	Cellular Processes;Metabolism	Global and overview maps;Energy metabolism;Transport and catabolism	1.55056	0.000429738	0.000310554	K02155//V-type H+-transporting ATPase 16kDa proteolipid subunit+ko04145//Phagosome+ko01100//Metabolic pathways+ko00190//Oxidative phosphorylation;K02155//V-type H+-transporting ATPase 16kDa proteolipid subunit+ko04145//Phagosome+ko01100//Metabolic pathways+ko00190//Oxidative phosphorylation;K02155//V-type H+-transporting ATPase 16kDa proteolipid subunit+ko04145//Phagosome+ko01100//Metabolic pathw…	ATP synthase subunit C	XM_002294995.1 Thalassiosira pseudonana CCMP1335 v-atpase subunit partial mRNA	v-atpase subunit, partial [Thalassiosira pseudonana CCMP1335] >EED87811.1 v-atpase subunit, partial [Thalassiosira pseudonana CCMP1335]	[C] KOG0232 Vacuolar H+-ATPase V0 sector, subunits c/c'	V-type proton ATPase 16 kDa proteolipid subunit OS=Nicotiana tabacum PE=2 SV=1	GO:0005774//vacuolar membrane;GO:0033179//proton-transporting V-type ATPase, V0 domain;GO:0015991//ATP hydrolysis coupled proton transport;GO:0000220//vacuolar proton-transporting V-type ATPase, V0 domain;GO:0016021//integral component of membrane;GO:0015078//hydrogen ion transmembrane transporter activity;GO:0007035//vacuolar acidification;GO:0046961//proton-transporting ATPase activity, rotatio…
CL419.Contig2_All	1116	ko00190//Oxidative phosphorylation	Metabolism	Energy metabolism	1.37928	6.16859e-08	2.8793e-08	K01507//inorganic pyrophosphatase [EC:3.6.1.1]+ko00190//Oxidative phosphorylation;K01507//inorganic pyrophosphatase [EC:3.6.1.1]+ko00190//Oxidative phosphorylation;K01507//inorganic pyrophosphatase [EC:3.6.1.1]+ko00190//Oxidative phosphorylation;K01507//inorganic pyrophosphatase [EC:3.6.1.1]+ko00190//Oxidative phosphorylation;K01507//inorganic pyrophosphatase [EC:3.6.1.1]+ko00190//Oxidative phosp…	Inorganic pyrophosphatase		inorganic pyrophosphatase [Fragilariopsis cylindrus CCMP1102]	[C] KOG1626 Inorganic pyrophosphatase/Nucleosome remodeling factor, subunit NURF38	Soluble inorganic pyrophosphatase 6, chloroplastic OS=Arabidopsis thaliana GN=PPA6 PE=1 SV=1	GO:0000287//magnesium ion binding;GO:0004427//inorganic diphosphatase activity;GO:0006796//phosphate-containing compound metabolic process;GO:0005737//cytoplasm
CL9340.Contig2_All	1792	ko00190//Oxidative phosphorylation;ko01100//Metabolic pathways;ko04145//Phagosome	Cellular Processes;Metabolism	Transport and catabolism;Global and overview maps;Energy metabolism	1.27441	0	0	K02155//V-type H+-transporting ATPase 16kDa proteolipid subunit+ko04145//Phagosome+ko01100//Metabolic pathways+ko00190//Oxidative phosphorylation;K02155//V-type H+-transporting ATPase 16kDa proteolipid subunit+ko04145//Phagosome+ko01100//Metabolic pathways+ko00190//Oxidative phosphorylation;K02155//V-type H+-transporting ATPase 16kDa proteolipid subunit+ko04145//Phagosome+ko01100//Metabolic pathw…	ATP synthase subunit C	XM_022164744.1 PREDICTED: Helianthus annuus V-type proton ATPase 16 kDa proteolipid subunit-like (LOC110920581), mRNA	hypothetical protein AURANDRAFT_32575 [Aureococcus anophagefferens] >EGB04501.1 hypothetical protein AURANDRAFT_32575 [Aureococcus anophagefferens]	[C] KOG0232 Vacuolar H+-ATPase V0 sector, subunits c/c'	V-type proton ATPase 16 kDa proteolipid subunit OS=Chrysotila carteri GN=VAP PE=2 SV=1	GO:0005774//vacuolar membrane;GO:0033179//proton-transporting V-type ATPase, V0 domain;GO:0015991//ATP hydrolysis coupled proton transport;GO:0000220//vacuolar proton-transporting V-type ATPase, V0 domain;GO:0016021//integral component of membrane;GO:0015078//hydrogen ion transmembrane transporter activity;GO:0007035//vacuolar acidification;GO:0046961//proton-transporting ATPase activity, rotatio…
CL4750.Contig3_All	1777	ko00190//Oxidative phosphorylation	Metabolism	Energy metabolism	1.07079	0	0	K01507//inorganic pyrophosphatase [EC:3.6.1.1]+ko00190//Oxidative phosphorylation;K01507//inorganic pyrophosphatase [EC:3.6.1.1]+ko00190//Oxidative phosphorylation;K01507//inorganic pyrophosphatase [EC:3.6.1.1]+ko00190//Oxidative phosphorylation	Inorganic pyrophosphatase	XM_009041196.1 Aureococcus anophagefferens hypothetical protein (PPA4), mRNA	conserved unknown protein [Ectocarpus siliculosus]	[C] KOG1626 Inorganic pyrophosphatase/Nucleosome remodeling factor, subunit NURF38	Soluble inorganic pyrophosphatase 1, chloroplastic OS=Chlamydomonas reinhardtii GN=ppa1 PE=1 SV=1	GO:0000287//magnesium ion binding;GO:0004427//inorganic diphosphatase activity;GO:0006796//phosphate-containing compound metabolic process;GO:0005737//cytoplasm
CL1061.Contig3_All	1694	ko00190//Oxidative phosphorylation;ko01100//Metabolic pathways;ko04145//Phagosome	Cellular Processes;Metabolism	Energy metabolism;Transport and catabolism;Global and overview maps	-1.06033	1.8092e-116	1.31831e-117	K02148//V-type H+-transporting ATPase subunit C+ko04145//Phagosome+ko01100//Metabolic pathways+ko00190//Oxidative phosphorylation;K02148//V-type H+-transporting ATPase subunit C+ko04145//Phagosome+ko01100//Metabolic pathways+ko00190//Oxidative phosphorylation;K02148//V-type H+-transporting ATPase subunit C+ko04145//Phagosome+ko01100//Metabolic pathways+ko00190//Oxidative phosphorylation;K02148//V…	V-ATPase subunit C		conserved unknown protein [Ectocarpus siliculosus]	[C] KOG2909 Vacuolar H+-ATPase V1 sector, subunit C	V-type proton ATPase subunit C OS=Hordeum vulgare GN=VATC PE=1 SV=1	GO:0015991//ATP hydrolysis coupled proton transport;GO:0015078//hydrogen ion transmembrane transporter activity;GO:0033180//proton-transporting V-type ATPase, V1 domain
CL106.Contig48_All	3073	ko01100//Metabolic pathways;ko00190//Oxidative phosphorylation;ko00195//Photosynthesis	Metabolism	Energy metabolism;Global and overview maps	-1.06699	6.58583e-103	5.27708e-104	K02108//F-type H+-transporting ATPase subunit a+ko01100//Metabolic pathways+ko00190//Oxidative phosphorylation+ko00195//Photosynthesis		HG670306.1 Triticum aestivum chromosome 3B, genomic scaffold, cultivar Chinese Spring	cell wall-associated hydrolase, partial [Phaeodactylum tricornutum]		Uncharacterized protein ORF91 OS=Phalaenopsis aphrodite subsp. formosana PE=4 SV=1
Unigene45028_All	3475	ko00190//Oxidative phosphorylation	Metabolism	Energy metabolism	-1.10072	2.33169e-184	1.19303e-185	K01535//H+-transporting ATPase [EC:7.1.2.1]+ko00190//Oxidative phosphorylation;K01535//H+-transporting ATPase [EC:7.1.2.1]+ko00190//Oxidative phosphorylation	E1-E2 ATPase	D26472.1 Heterosigma akashiwo mRNA for P-type ATPase	plasma membrane h+ atpase [Klebsormidium nitens]	[P] KOG0205 Plasma membrane H+-transporting ATPase	Plasma membrane ATPase 1 OS=Nicotiana plumbaginifolia GN=PMA1 PE=2 SV=1	GO:0006754//ATP biosynthetic process;GO:0005524//ATP binding;GO:0016021//integral component of membrane;GO:0008553//hydrogen-exporting ATPase activity, phosphorylative mechanism
Unigene8649_All	3002	ko00190//Oxidative phosphorylation;ko01200//Carbon metabolism;ko01100//Metabolic pathways;ko00020//Citrate cycle (TCA cycle);ko01110//Biosynthesis of secondary metabolites	Metabolism	Energy metabolism;Carbohydrate metabolism;Global and overview maps	-1.11001	1.0832e-64	1.21086e-65	K00234//succinate dehydrogenase (ubiquinone) flavoprotein subunit [EC:1.3.5.1]+ko00020//Citrate cycle (TCA cycle)+ko01100//Metabolic pathways+ko00190//Oxidative phosphorylation+ko01110//Biosynthesis of secondary metabolites+ko01200//Carbon metabolism;K00234//succinate dehydrogenase (ubiquinone) flavoprotein subunit [EC:1.3.5.1]+ko00020//Citrate cycle (TCA cycle)+ko01100//Metabolic pathways+ko0019…	FAD binding domain	XM_009040194.1 Aureococcus anophagefferens hypothetical protein mRNA	succinate dehydrogenase (ubiquinone) flavoprotein subunit [Fistulifera solaris]	[C] KOG2403 Succinate dehydrogenase, flavoprotein subunit	Succinate dehydrogenase [ubiquinone] flavoprotein subunit 1, mitochondrial OS=Arabidopsis thaliana GN=SDH1-1 PE=1 SV=1	GO:0009055//electron transfer activity;GO:0006121//mitochondrial electron transport, succinate to ubiquinone;GO:0050660//flavin adenine dinucleotide binding;GO:0006099//tricarboxylic acid cycle;GO:0005749//mitochondrial respiratory chain complex II, succinate dehydrogenase complex (ubiquinone);GO:0000104//succinate dehydrogenase activity;GO:0022900//electron transport chain;GO:0005743//mitochondr…
CL3713.Contig4_All	1541	ko00190//Oxidative phosphorylation	Metabolism	Energy metabolism	-1.11213	1.26408e-11	4.60398e-12	K01507//inorganic pyrophosphatase [EC:3.6.1.1]+ko00190//Oxidative phosphorylation;K01507//inorganic pyrophosphatase [EC:3.6.1.1]+ko00190//Oxidative phosphorylation;K01507//inorganic pyrophosphatase [EC:3.6.1.1]+ko00190//Oxidative phosphorylation;K01507//inorganic pyrophosphatase [EC:3.6.1.1]+ko00190//Oxidative phosphorylation	Inorganic pyrophosphatase		similar to 3-phosphoadenosine 5-phosphosulfate synthase 2 isoform 2 [Ectocarpus siliculosus]	[C] KOG1626 Inorganic pyrophosphatase/Nucleosome remodeling factor, subunit NURF38	Soluble inorganic pyrophosphatase 6, chloroplastic OS=Arabidopsis thaliana GN=PPA6 PE=1 SV=1	GO:0000103//sulfate assimilation;GO:0000287//magnesium ion binding;GO:0005524//ATP binding;GO:0004427//inorganic diphosphatase activity;GO:0004020//adenylylsulfate kinase activity;GO:0004781//sulfate adenylyltransferase (ATP) activity;GO:0005737//cytoplasm;GO:0016021//integral component of membrane;GO:0006796//phosphate-containing compound metabolic process
Unigene37102_All	5158	ko01100//Metabolic pathways;ko00190//Oxidative phosphorylation;ko00195//Photosynthesis	Metabolism	Global and overview maps;Energy metabolism	-1.17038	7.48476e-110	5.68426e-111	K02111//F-type H+/Na+-transporting ATPase subunit alpha [EC:7.1.2.2 7.2.2.1]+ko01100//Metabolic pathways+ko00190//Oxidative phosphorylation+ko00195//Photosynthesis;K02132//F-type H+-transporting ATPase subunit alpha+ko01100//Metabolic pathways+ko00190//Oxidative phosphorylation;K02132//F-type H+-transporting ATPase subunit alpha+ko01100//Metabolic pathways+ko00190//Oxidative phosphorylation;K0213…	ATP synthase	MF083689.2 Chlamydomonas reinhardtii strain CC-2359 lts1-30 mt- chloroplast, complete genome	hypothetical protein SOVF_209290, partial [Spinacia oleracea]	[C] KOG1353 F0F1-type ATP synthase, alpha subunit	ATP synthase subunit alpha, chloroplastic OS=Rhodomonas salina GN=atpA PE=3 SV=1	GO:0015986//ATP synthesis coupled proton transport;GO:0045261//proton-transporting ATP synthase complex, catalytic core F(1);GO:0005524//ATP binding;GO:0045263//proton-transporting ATP synthase complex, coupling factor F(o);GO:0016021//integral component of membrane;GO:0046933//proton-transporting ATP synthase activity, rotational mechanism
CL106.Contig45_All	1603	ko00195//Photosynthesis;ko01100//Metabolic pathways;ko00190//Oxidative phosphorylation	Metabolism	Global and overview maps;Energy metabolism	-1.1849	0.000189401	0.000129479	K02108//F-type H+-transporting ATPase subunit a+ko01100//Metabolic pathways+ko00190//Oxidative phosphorylation+ko00195//Photosynthesis		LC269924.1 Heterosigma akashiwo chloroplast DNA, complete genome, isolate: CCMP1596	hypothetical protein BVRB_041110, partial [Beta vulgaris subsp. vulgaris]		Uncharacterized protein ORF91 OS=Phalaenopsis aphrodite subsp. formosana PE=4 SV=1
CL106.Contig5_All	3900	ko00195//Photosynthesis;ko01100//Metabolic pathways;ko00190//Oxidative phosphorylation	Metabolism	Energy metabolism;Global and overview maps	-1.18674	7.70024e-84	7.12094e-85	K02108//F-type H+-transporting ATPase subunit a+ko01100//Metabolic pathways+ko00190//Oxidative phosphorylation+ko00195//Photosynthesis;K01358//ATP-dependent Clp protease, protease subunit [EC:3.4.21.92]		LC269924.1 Heterosigma akashiwo chloroplast DNA, complete genome, isolate: CCMP1596	hypothetical protein CH29B_p069 (chloroplast) [Chlorella sp. ArM0029B]		Uncharacterized protein ORF91 OS=Phalaenopsis aphrodite subsp. formosana PE=4 SV=1
CL6454.Contig3_All	22636	ko00190//Oxidative phosphorylation;ko01100//Metabolic pathways	Metabolism	Energy metabolism;Global and overview maps	-1.19686	0	0	K03883//NADH-ubiquinone oxidoreductase chain 5 [EC:7.1.1.2]+ko01100//Metabolic pathways+ko00190//Oxidative phosphorylation;K03883//NADH-ubiquinone oxidoreductase chain 5 [EC:7.1.1.2]+ko01100//Metabolic pathways+ko00190//Oxidative phosphorylation;K03883//NADH-ubiquinone oxidoreductase chain 5 [EC:7.1.1.2]+ko01100//Metabolic pathways+ko00190//Oxidative phosphorylation;K03883//NADH-ubiquinone oxidor…	NADH dehydrogenase	KU561548.1 Heterosigma akashiwo strain Ha00_17 isolate SecD mitochondrion, complete genome	NADH dehydrogenase subunit 5 (mitochondrion) [Chattonella marina] >BAI70571.1 NADH dehydrogenase subunit 5 (mitochondrion) [Chattonella marina]	[C] KOG4668 NADH dehydrogenase subunits 2, 5, and related proteins	NADH-ubiquinone oxidoreductase chain 5 OS=Marchantia polymorpha GN=ND5 PE=3 SV=2	GO:0005743//mitochondrial inner membrane;GO:0016021//integral component of membrane;GO:0042773//ATP synthesis coupled electron transport;GO:0070469//respiratory chain;GO:0008137//NADH dehydrogenase (ubiquinone) activity
CL491.Contig3_All	2066	ko01100//Metabolic pathways;ko00190//Oxidative phosphorylation	Metabolism	Global and overview maps;Energy metabolism	-1.22024	0	0	K02133//F-type H+-transporting ATPase subunit beta [EC:7.1.2.2]+ko01100//Metabolic pathways+ko00190//Oxidative phosphorylation;K02133//F-type H+-transporting ATPase subunit beta [EC:7.1.2.2]+ko01100//Metabolic pathways+ko00190//Oxidative phosphorylation;K02133//F-type H+-transporting ATPase subunit beta [EC:7.1.2.2]+ko01100//Metabolic pathways+ko00190//Oxidative phosphorylation;K02133//F-type H+-…	ATP synthase alpha/beta family, nucleotide-binding domain	X61624.1 Chlamydomonas reinhardtii atp2 (atpB) mRNA	F-type H-ATPase beta subunit [Ectocarpus siliculosus]	[C] KOG1350 F0F1-type ATP synthase, beta subunit	ATP synthase subunit beta, mitochondrial OS=Chlamydomonas reinhardtii GN=ATP2 PE=1 SV=1	GO:0015986//ATP synthesis coupled proton transport;GO:0045261//proton-transporting ATP synthase complex, catalytic core F(1);GO:0005524//ATP binding;GO:0046933//proton-transporting ATP synthase activity, rotational mechanism
Unigene40776_All	3035	ko01110//Biosynthesis of secondary metabolites;ko00190//Oxidative phosphorylation;ko01100//Metabolic pathways;ko00860//Porphyrin and chlorophyll metabolism	Metabolism	Global and overview maps;Energy metabolism;Metabolism of cofactors and vitamins	-1.29657	1.2198e-38	1.96681e-39	K02257//heme o synthase [EC:2.5.1.141]+ko00860//Porphyrin and chlorophyll metabolism+ko01100//Metabolic pathways+ko00190//Oxidative phosphorylation+ko01110//Biosynthesis of secondary metabolites;K02257//heme o synthase [EC:2.5.1.141]+ko00860//Porphyrin and chlorophyll metabolism+ko01100//Metabolic pathways+ko00190//Oxidative phosphorylation+ko01110//Biosynthesis of secondary metabolites;K02257//h…	UbiA prenyltransferase family		protoheme IX farnesyltransferase [Monoraphidium neglectum] >KIY93611.1 protoheme IX farnesyltransferase [Monoraphidium neglectum]	[H] KOG1380 Heme A farnesyltransferase	Cytochrome c oxidase subunit 3 OS=Marchantia polymorpha GN=COX3 PE=3 SV=2	GO:0016021//integral component of membrane;GO:0031966//mitochondrial membrane;GO:0008495//protoheme IX farnesyltransferase activity;GO:0048034//heme O biosynthetic process
Unigene2340_All	2348	ko00190//Oxidative phosphorylation;ko01100//Metabolic pathways	Metabolism	Global and overview maps;Energy metabolism	-1.32802	0	0	K03935//NADH dehydrogenase (ubiquinone) Fe-S protein 2 [EC:7.1.1.2 1.6.99.3]+ko01100//Metabolic pathways+ko00190//Oxidative phosphorylation;K03935//NADH dehydrogenase (ubiquinone) Fe-S protein 2 [EC:7.1.1.2 1.6.99.3]+ko01100//Metabolic pathways+ko00190//Oxidative phosphorylation;K03935//NADH dehydrogenase (ubiquinone) Fe-S protein 2 [EC:7.1.1.2 1.6.99.3]+ko01100//Metabolic pathways+ko00190//Oxida…	Respiratory-chain NADH dehydrogenase, 49 Kd subunit	KU561548.1 Heterosigma akashiwo strain Ha00_17 isolate SecD mitochondrion, complete genome	NADH dehydrogenase subunit 7 (mitochondrion) [Nannochloropsis salina] >AGI48967.1 NADH dehydrogenase subunit 7 (mitochondrion) [Nannochloropsis salina] >AHX25051.1 NADH dehydrogenase subunit 7 (mitochondrion) (mitochondrion) [Nannochloropsis salina]	[C] KOG2870 NADH:ubiquinone oxidoreductase, NDUFS2/49 kDa subunit	NADH-ubiquinone oxidoreductase 49 kDa subunit OS=Pylaiella littoralis GN=NAD7 PE=3 SV=1	GO:0016651//oxidoreductase activity, acting on NAD(P)H;GO:0048038//quinone binding;GO:0051287//NAD binding;GO:0005739//mitochondrion
CL106.Contig39_All	2649	ko00190//Oxidative phosphorylation;ko01100//Metabolic pathways;ko00195//Photosynthesis	Metabolism	Energy metabolism;Global and overview maps	-1.38031	2.99697e-244	1.22843e-245	K02108//F-type H+-transporting ATPase subunit a+ko01100//Metabolic pathways+ko00190//Oxidative phosphorylation+ko00195//Photosynthesis;K01358//ATP-dependent Clp protease, protease subunit [EC:3.4.21.92]		HG670306.1 Triticum aestivum chromosome 3B, genomic scaffold, cultivar Chinese Spring	hypothetical protein BVRB_041110, partial [Beta vulgaris subsp. vulgaris]		Uncharacterized protein ORF91 OS=Phalaenopsis aphrodite subsp. formosana PE=4 SV=1
CL4289.Contig1_All	904	ko00190//Oxidative phosphorylation;ko01100//Metabolic pathways;ko01110//Biosynthesis of secondary metabolites;ko01200//Carbon metabolism;ko00020//Citrate cycle (TCA cycle)	Metabolism	Carbohydrate metabolism;Global and overview maps;Energy metabolism	-1.41462	8.50402e-120	6.07521e-121	K00236//succinate dehydrogenase (ubiquinone) cytochrome b560 subunit+ko00020//Citrate cycle (TCA cycle)+ko01100//Metabolic pathways+ko00190//Oxidative phosphorylation+ko01110//Biosynthesis of secondary metabolites+ko01200//Carbon metabolism;K00236//succinate dehydrogenase (ubiquinone) cytochrome b560 subunit+ko00020//Citrate cycle (TCA cycle)+ko01100//Metabolic pathways+ko00190//Oxidative phospho…	Succinate dehydrogenase/Fumarate reductase transmembrane subunit		succinate dehydrogenase, cytochrome b556 subunit [Aphanomyces invadans] >ETV96110.1 succinate dehydrogenase, cytochrome b556 subunit [Aphanomyces invadans]	[G] KOG0449 Succinate dehydrogenase, cytochrome b subunit	Succinate dehydrogenase cytochrome b560 subunit OS=Porphyra purpurea GN=SDH3 PE=3 SV=1	GO:0006099//tricarboxylic acid cycle;GO:0000104//succinate dehydrogenase activity;GO:0046872//metal ion binding;GO:0045281//succinate dehydrogenase complex;GO:0016021//integral component of membrane
Unigene42159_All	1185	ko00190//Oxidative phosphorylation;ko01100//Metabolic pathways	Metabolism	Energy metabolism;Global and overview maps	-1.42789	0	0	K21776//protein lin-54;K03955//NADH dehydrogenase (ubiquinone) 1 alpha/beta subcomplex 1+ko01100//Metabolic pathways+ko00190//Oxidative phosphorylation;K03955//NADH dehydrogenase (ubiquinone) 1 alpha/beta subcomplex 1+ko01100//Metabolic pathways+ko00190//Oxidative phosphorylation;K03955//NADH dehydrogenase (ubiquinone) 1 alpha/beta subcomplex 1+ko01100//Metabolic pathways+ko00190//Oxidative phosp…	Protein of unknown function (DUF1257)	LC269920.1 Heterosigma akashiwo chloroplast DNA, complete genome, isolate: CCAP934/4	Ycf35 [Heterosigma akashiwo] >YP_001936366.1 Ycf35 [Heterosigma akashiwo] >ABV65910.1 conserved hypothetical plastid protein Ycf35 (chloroplast) [Heterosigma akashiwo] >ABV65972.1 conserved hypothetical plastid protein Ycf35 (chloroplast) [Heterosigma akashiwo] >ABV70051.1 conserved hypothetical plastid protein Ycf35 (chloroplast) [Heterosigma akashiwo] >ABV70113.1 conserved hypothetical plastid …	[CIQ] KOG1748 Acyl carrier protein/NADH-ubiquinone oxidoreductase, NDUFAB1/SDAP subunit	Acyl carrier protein OS=Cyanidioschyzon merolae (strain 10D) GN=acpP PE=3 SV=1	GO:0000036//acyl carrier activity;GO:0009507//chloroplast
CL4289.Contig2_All	888	ko01100//Metabolic pathways;ko01110//Biosynthesis of secondary metabolites;ko00190//Oxidative phosphorylation;ko01200//Carbon metabolism;ko00020//Citrate cycle (TCA cycle)	Metabolism	Energy metabolism;Carbohydrate metabolism;Global and overview maps	-1.44215	9.52485e-113	7.10524e-114	K00236//succinate dehydrogenase (ubiquinone) cytochrome b560 subunit+ko00020//Citrate cycle (TCA cycle)+ko01100//Metabolic pathways+ko00190//Oxidative phosphorylation+ko01110//Biosynthesis of secondary metabolites+ko01200//Carbon metabolism;K00236//succinate dehydrogenase (ubiquinone) cytochrome b560 subunit+ko00020//Citrate cycle (TCA cycle)+ko01100//Metabolic pathways+ko00190//Oxidative phospho…	Succinate dehydrogenase/Fumarate reductase transmembrane subunit		succinate dehydrogenase, cytochrome b556 subunit [Aphanomyces invadans] >ETV96110.1 succinate dehydrogenase, cytochrome b556 subunit [Aphanomyces invadans]	[G] KOG0449 Succinate dehydrogenase, cytochrome b subunit	Succinate dehydrogenase cytochrome b560 subunit OS=Porphyra purpurea GN=SDH3 PE=3 SV=1	GO:0006099//tricarboxylic acid cycle;GO:0000104//succinate dehydrogenase activity;GO:0046872//metal ion binding;GO:0045281//succinate dehydrogenase complex;GO:0016021//integral component of membrane
CL106.Contig18_All	3445	ko00195//Photosynthesis;ko01100//Metabolic pathways;ko00190//Oxidative phosphorylation	Metabolism	Global and overview maps;Energy metabolism	-1.44385	2.92715e-82	2.73578e-83	K02108//F-type H+-transporting ATPase subunit a+ko01100//Metabolic pathways+ko00190//Oxidative phosphorylation+ko00195//Photosynthesis		HG670306.1 Triticum aestivum chromosome 3B, genomic scaffold, cultivar Chinese Spring	cell wall-associated hydrolase, partial [Phaeodactylum tricornutum]		Uncharacterized protein ORF91 OS=Phalaenopsis aphrodite subsp. formosana PE=4 SV=1
CL434.Contig3_All	797	ko00190//Oxidative phosphorylation;ko01100//Metabolic pathways	Metabolism	Energy metabolism;Global and overview maps	-1.45046	1.53828e-45	2.21272e-46	K11352//NADH dehydrogenase (ubiquinone) 1 alpha subcomplex subunit 12+ko01100//Metabolic pathways+ko00190//Oxidative phosphorylation;K11352//NADH dehydrogenase (ubiquinone) 1 alpha subcomplex subunit 12+ko01100//Metabolic pathways+ko00190//Oxidative phosphorylation;K11352//NADH dehydrogenase (ubiquinone) 1 alpha subcomplex subunit 12+ko01100//Metabolic pathways+ko00190//Oxidative phosphorylation;…	NADH ubiquinone oxidoreductase subunit NDUFA12		NADH dehydrogenase (ubiquinone) [Ectocarpus siliculosus]	[C] KOG3382 NADH:ubiquinone oxidoreductase, B17.2 subunit	Formin-like protein 5 OS=Oryza sativa subsp. japonica GN=FH5 PE=2 SV=2
Unigene5006_All	4100	ko00195//Photosynthesis;ko01100//Metabolic pathways;ko00190//Oxidative phosphorylation	Metabolism	Energy metabolism;Global and overview maps	-1.45086	2.43781e-44	3.55861e-45	K02108//F-type H+-transporting ATPase subunit a+ko01100//Metabolic pathways+ko00190//Oxidative phosphorylation+ko00195//Photosynthesis;K01358//ATP-dependent Clp protease, protease subunit [EC:3.4.21.92]		HG670306.1 Triticum aestivum chromosome 3B, genomic scaffold, cultivar Chinese Spring	hypothetical protein BVRB_041110, partial [Beta vulgaris subsp. vulgaris]		Uncharacterized protein ORF91 OS=Phalaenopsis aphrodite subsp. formosana PE=4 SV=1
Unigene9644_All	4454	ko00190//Oxidative phosphorylation;ko01110//Biosynthesis of secondary metabolites;ko01200//Carbon metabolism;ko01100//Metabolic pathways;ko00020//Citrate cycle (TCA cycle)	Metabolism	Energy metabolism;Carbohydrate metabolism;Global and overview maps	-1.63049	9.97915e-153	5.99103e-154	K00234//succinate dehydrogenase (ubiquinone) flavoprotein subunit [EC:1.3.5.1]+ko00020//Citrate cycle (TCA cycle)+ko01100//Metabolic pathways+ko00190//Oxidative phosphorylation+ko01110//Biosynthesis of secondary metabolites+ko01200//Carbon metabolism;K00234//succinate dehydrogenase (ubiquinone) flavoprotein subunit [EC:1.3.5.1]+ko00020//Citrate cycle (TCA cycle)+ko01100//Metabolic pathways+ko0019…	FAD binding domain	XM_009040194.1 Aureococcus anophagefferens hypothetical protein mRNA	succinate dehydrogenase (ubiquinone) flavoprotein subunit [Fistulifera solaris]	[C] KOG2403 Succinate dehydrogenase, flavoprotein subunit	Succinate dehydrogenase [ubiquinone] flavoprotein subunit 1, mitochondrial OS=Arabidopsis thaliana GN=SDH1-1 PE=1 SV=1	GO:0009055//electron transfer activity;GO:0006121//mitochondrial electron transport, succinate to ubiquinone;GO:0050660//flavin adenine dinucleotide binding;GO:0006099//tricarboxylic acid cycle;GO:0005749//mitochondrial respiratory chain complex II, succinate dehydrogenase complex (ubiquinone);GO:0000104//succinate dehydrogenase activity;GO:0022900//electron transport chain;GO:0005743//mitochondr…
CL9340.Contig1_All	1429	ko00190//Oxidative phosphorylation;ko04145//Phagosome;ko01100//Metabolic pathways	Cellular Processes;Metabolism	Global and overview maps;Transport and catabolism;Energy metabolism	-1.65286	1.22557e-182	6.32991e-184	K02155//V-type H+-transporting ATPase 16kDa proteolipid subunit+ko04145//Phagosome+ko01100//Metabolic pathways+ko00190//Oxidative phosphorylation;K02155//V-type H+-transporting ATPase 16kDa proteolipid subunit+ko04145//Phagosome+ko01100//Metabolic pathways+ko00190//Oxidative phosphorylation;K02155//V-type H+-transporting ATPase 16kDa proteolipid subunit+ko04145//Phagosome+ko01100//Metabolic pathw…	ATP synthase subunit C	XM_022164744.1 PREDICTED: Helianthus annuus V-type proton ATPase 16 kDa proteolipid subunit-like (LOC110920581), mRNA	hypothetical protein AURANDRAFT_32575 [Aureococcus anophagefferens] >EGB04501.1 hypothetical protein AURANDRAFT_32575 [Aureococcus anophagefferens]	[C] KOG0232 Vacuolar H+-ATPase V0 sector, subunits c/c'	V-type proton ATPase 16 kDa proteolipid subunit OS=Chrysotila carteri GN=VAP PE=2 SV=1	GO:0005774//vacuolar membrane;GO:0033179//proton-transporting V-type ATPase, V0 domain;GO:0015991//ATP hydrolysis coupled proton transport;GO:0000220//vacuolar proton-transporting V-type ATPase, V0 domain;GO:0016021//integral component of membrane;GO:0015078//hydrogen ion transmembrane transporter activity;GO:0007035//vacuolar acidification;GO:0046961//proton-transporting ATPase activity, rotatio…
Unigene10194_All	6678	ko00195//Photosynthesis;ko03020//RNA polymerase;ko00190//Oxidative phosphorylation;ko03010//Ribosome;ko01100//Metabolic pathways	Metabolism;Genetic Information Processing	Energy metabolism;Translation;Transcription;Global and overview maps	-1.72625	1.96548e-105	1.54644e-106	K02108//F-type H+-transporting ATPase subunit a+ko01100//Metabolic pathways+ko00190//Oxidative phosphorylation+ko00195//Photosynthesis;K03046//DNA-directed RNA polymerase subunit beta' [EC:2.7.7.6]+ko03020//RNA polymerase;K02948//small subunit ribosomal protein S11+ko03010//Ribosome;K01358//ATP-dependent Clp protease, protease subunit [EC:3.4.21.92]	SIS domain	KT305105.1 Trachelomonas sp. Jilnal030207BT small subunit ribosomal RNA gene, partial sequence; chloroplast	cell wall-associated hydrolase [Phaseolus vulgaris]		Uncharacterized protein ORF91 OS=Phalaenopsis aphrodite subsp. formosana PE=4 SV=1
CL5667.Contig1_All	5014	ko00020//Citrate cycle (TCA cycle);ko01110//Biosynthesis of secondary metabolites;ko01100//Metabolic pathways;ko01200//Carbon metabolism;ko00190//Oxidative phosphorylation	Metabolism	Global and overview maps;Carbohydrate metabolism;Energy metabolism	-1.74315	3.49452e-83	3.24639e-84	K00234//succinate dehydrogenase (ubiquinone) flavoprotein subunit [EC:1.3.5.1]+ko00020//Citrate cycle (TCA cycle)+ko01100//Metabolic pathways+ko00190//Oxidative phosphorylation+ko01110//Biosynthesis of secondary metabolites+ko01200//Carbon metabolism;K00234//succinate dehydrogenase (ubiquinone) flavoprotein subunit [EC:1.3.5.1]+ko00020//Citrate cycle (TCA cycle)+ko01100//Metabolic pathways+ko0019…	FAD binding domain		hypothetical protein OsI_32585 [Oryza sativa Indica Group]	[C] KOG2403 Succinate dehydrogenase, flavoprotein subunit	Succinate dehydrogenase [ubiquinone] iron-sulfur subunit 2, mitochondrial OS=Oryza sativa subsp. japonica GN=SDH2-2 PE=1 SV=1	GO:0009055//electron transfer activity;GO:0006121//mitochondrial electron transport, succinate to ubiquinone;GO:0050660//flavin adenine dinucleotide binding;GO:0006099//tricarboxylic acid cycle;GO:0022900//electron transport chain;GO:0005749//mitochondrial respiratory chain complex II, succinate dehydrogenase complex (ubiquinone);GO:0000104//succinate dehydrogenase activity;GO:0005743//mitochondr…
Unigene16460_All	3440	ko00190//Oxidative phosphorylation;ko04145//Phagosome;ko01100//Metabolic pathways	Metabolism;Cellular Processes	Transport and catabolism;Global and overview maps;Energy metabolism	-1.78075	0	0	K02154//V-type H+-transporting ATPase subunit a+ko04145//Phagosome+ko01100//Metabolic pathways+ko00190//Oxidative phosphorylation;K02154//V-type H+-transporting ATPase subunit a+ko04145//Phagosome+ko01100//Metabolic pathways+ko00190//Oxidative phosphorylation;K02154//V-type H+-transporting ATPase subunit a+ko04145//Phagosome+ko01100//Metabolic pathways+ko00190//Oxidative phosphorylation	V-type ATPase 116kDa subunit family	XM_009523833.1 Phytophthora sojae proton pump, proton transport partial mRNA	v-type h-atpase [Ectocarpus siliculosus]	[C] KOG2189 Vacuolar H+-ATPase V0 sector, subunit a	Formin-like protein 5 OS=Oryza sativa subsp. japonica GN=FH5 PE=2 SV=2
CL106.Contig71_All	2653	ko00190//Oxidative phosphorylation;ko01100//Metabolic pathways;ko00195//Photosynthesis	Metabolism	Global and overview maps;Energy metabolism	-1.83021	2.63479e-08	1.1955e-08	K02108//F-type H+-transporting ATPase subunit a+ko01100//Metabolic pathways+ko00190//Oxidative phosphorylation+ko00195//Photosynthesis		KU726247.1 Heterosigma akashiwo isolate NEPCC522 mitochondrion, complete genome	hypothetical protein BVRB_020780, partial [Beta vulgaris subsp. vulgaris]		Uncharacterized protein ORF91 OS=Phalaenopsis aphrodite subsp. formosana PE=4 SV=1
CL106.Contig20_All	10020	ko00190//Oxidative phosphorylation;ko01100//Metabolic pathways	Metabolism	Energy metabolism;Global and overview maps	-1.86948	0	0	K03935//NADH dehydrogenase (ubiquinone) Fe-S protein 2 [EC:7.1.1.2 1.6.99.3]+ko01100//Metabolic pathways+ko00190//Oxidative phosphorylation;K03935//NADH dehydrogenase (ubiquinone) Fe-S protein 2 [EC:7.1.1.2 1.6.99.3]+ko01100//Metabolic pathways+ko00190//Oxidative phosphorylation;K03935//NADH dehydrogenase (ubiquinone) Fe-S protein 2 [EC:7.1.1.2 1.6.99.3]+ko01100//Metabolic pathways+ko00190//Oxida…	Respiratory-chain NADH dehydrogenase, 49 Kd subunit	KU561548.1 Heterosigma akashiwo strain Ha00_17 isolate SecD mitochondrion, complete genome	NADH dehydrogenase subunit 4 (mitochondrion) [Chattonella marina] >BAI70565.1 NADH dehydrogenase subunit 4 (mitochondrion) [Chattonella marina]	[C] KOG2870 NADH:ubiquinone oxidoreductase, NDUFS2/49 kDa subunit	NADH-ubiquinone oxidoreductase 49 kDa subunit OS=Pylaiella littoralis GN=NAD7 PE=3 SV=1	GO:0016651//oxidoreductase activity, acting on NAD(P)H;GO:0006120//mitochondrial electron transport, NADH to ubiquinone;GO:0016021//integral component of membrane;GO:0048038//quinone binding;GO:0051287//NAD binding;GO:0005739//mitochondrion;GO:0008137//NADH dehydrogenase (ubiquinone) activity
Unigene29848_All	4266	ko01100//Metabolic pathways;ko00190//Oxidative phosphorylation	Metabolism	Global and overview maps;Energy metabolism	-1.93535	0	0	K02256//cytochrome c oxidase subunit 1 [EC:1.9.3.1]+ko01100//Metabolic pathways+ko00190//Oxidative phosphorylation;K02256//cytochrome c oxidase subunit 1 [EC:1.9.3.1]+ko01100//Metabolic pathways+ko00190//Oxidative phosphorylation;K02256//cytochrome c oxidase subunit 1 [EC:1.9.3.1]+ko01100//Metabolic pathways+ko00190//Oxidative phosphorylation;K02256//cytochrome c oxidase subunit 1 [EC:1.9.3.1]+ko…	Cytochrome C and Quinol oxidase polypeptide I	KU561547.1 Heterosigma akashiwo strain H93616 isolate SecA mitochondrion, complete genome	cytochrome c oxidase subunit 1 (mitochondrion) [Monodopsis sp. MarTras21]	[C] KOG4769 Cytochrome c oxidase, subunit I	Cytochrome c oxidase subunit 1 OS=Marchantia polymorpha GN=COX1 PE=3 SV=2	GO:0006119//oxidative phosphorylation;GO:0020037//heme binding;GO:0005506//iron ion binding;GO:0004129//cytochrome-c oxidase activity;GO:0045277//respiratory chain complex IV;GO:0005743//mitochondrial inner membrane;GO:0016021//integral component of membrane;GO:0009060//aerobic respiration
CL7996.Contig1_All	620	ko01100//Metabolic pathways;ko01110//Biosynthesis of secondary metabolites;ko00020//Citrate cycle (TCA cycle);ko00190//Oxidative phosphorylation;ko01200//Carbon metabolism	Metabolism	Global and overview maps;Carbohydrate metabolism;Energy metabolism	-1.98778	1.46195e-93	1.24817e-94	K00237//succinate dehydrogenase (ubiquinone) membrane anchor subunit+ko00020//Citrate cycle (TCA cycle)+ko01100//Metabolic pathways+ko00190//Oxidative phosphorylation+ko01110//Biosynthesis of secondary metabolites+ko01200//Carbon metabolism;K00237//succinate dehydrogenase (ubiquinone) membrane anchor subunit+ko00020//Citrate cycle (TCA cycle)+ko01100//Metabolic pathways+ko00190//Oxidative phospho…	CybS, succinate dehydrogenase cytochrome B small subunit		succinate dehydrogenase subunit 4 [Nannochloropsis gaditana]			GO:0005743//mitochondrial inner membrane;GO:0016021//integral component of membrane
CL5614.Contig1_All	1033	ko00190//Oxidative phosphorylation;ko01100//Metabolic pathways	Metabolism	Global and overview maps;Energy metabolism	-2.03604	5.07773e-06	2.83847e-06	K02261//cytochrome c oxidase subunit 2+ko01100//Metabolic pathways+ko00190//Oxidative phosphorylation;K02261//cytochrome c oxidase subunit 2+ko01100//Metabolic pathways+ko00190//Oxidative phosphorylation;K02261//cytochrome c oxidase subunit 2+ko01100//Metabolic pathways+ko00190//Oxidative phosphorylation;K02261//cytochrome c oxidase subunit 2+ko01100//Metabolic pathways+ko00190//Oxidative phospho…	Cytochrome C oxidase subunit II, periplasmic domain		cytochrome c oxidase subunit 2 (mitochondrion) [Oltmannsiellopsis viridis] >ABC96367.1 cytochrome c oxidase subunit 2 (mitochondrion) [Oltmannsiellopsis viridis]	[C] KOG4767 Cytochrome c oxidase, subunit II, and related proteins	Cytochrome c oxidase subunit 2 OS=Oenothera berteroana GN=COX2 PE=3 SV=3	GO:0022900//electron transport chain;GO:0004129//cytochrome-c oxidase activity;GO:0005507//copper ion binding;GO:0005743//mitochondrial inner membrane;GO:0016021//integral component of membrane;GO:0070469//respiratory chain
CL9164.Contig2_All	12404	ko00190//Oxidative phosphorylation;ko01100//Metabolic pathways	Metabolism	Energy metabolism;Global and overview maps	-2.05213	0	0	K02256//cytochrome c oxidase subunit 1 [EC:1.9.3.1]+ko01100//Metabolic pathways+ko00190//Oxidative phosphorylation;K02256//cytochrome c oxidase subunit 1 [EC:1.9.3.1]+ko01100//Metabolic pathways+ko00190//Oxidative phosphorylation;K02256//cytochrome c oxidase subunit 1 [EC:1.9.3.1]+ko01100//Metabolic pathways+ko00190//Oxidative phosphorylation;K02256//cytochrome c oxidase subunit 1 [EC:1.9.3.1]+ko…	Cytochrome C and Quinol oxidase polypeptide I		cytochrome c oxidase subunit 1 (mitochondrion) [Pyramimonas parkeae] >AOT98926.1 cytochrome c oxidase subunit 1 (mitochondrion) [Pyramimonas parkeae]	[C] KOG4769 Cytochrome c oxidase, subunit I	Cytochrome c oxidase subunit 1 OS=Cyanidium caldarium GN=COX1 PE=3 SV=1	GO:0020037//heme binding;GO:0005506//iron ion binding;GO:0004129//cytochrome-c oxidase activity;GO:0045277//respiratory chain complex IV;GO:0009060//aerobic respiration;GO:0006119//oxidative phosphorylation;GO:0022900//electron transport chain;GO:0005507//copper ion binding;GO:0016021//integral component of membrane;GO:0005743//mitochondrial inner membrane;GO:0005886//plasma membrane
CL10778.Contig6_All	3526	ko01100//Metabolic pathways;ko00190//Oxidative phosphorylation	Metabolism	Energy metabolism;Global and overview maps	-2.07799	1.0079e-15	3.01759e-16	K02132//F-type H+-transporting ATPase subunit alpha+ko01100//Metabolic pathways+ko00190//Oxidative phosphorylation;K02132//F-type H+-transporting ATPase subunit alpha+ko01100//Metabolic pathways+ko00190//Oxidative phosphorylation;K02132//F-type H+-transporting ATPase subunit alpha+ko01100//Metabolic pathways+ko00190//Oxidative phosphorylation;K02132//F-type H+-transporting ATPase subunit alpha+ko…	ATP synthase	XM_002506176.1 Micromonas commoda H+-or Na+-translocating f-type, v-type and A-type ATPase superfamily partial mRNA	PREDICTED: uncharacterized protein LOC101255871 [Solanum lycopersicum]	[C] KOG1353 F0F1-type ATP synthase, alpha subunit	ATP synthase subunit alpha, mitochondrial OS=Glycine max GN=ATPA PE=3 SV=1	GO:0015986//ATP synthesis coupled proton transport;GO:0045261//proton-transporting ATP synthase complex, catalytic core F(1);GO:0005524//ATP binding;GO:0005739//mitochondrion;GO:0046933//proton-transporting ATP synthase activity, rotational mechanism
Unigene9867_All	2033	ko00190//Oxidative phosphorylation;ko01100//Metabolic pathways	Metabolism	Energy metabolism;Global and overview maps	-2.17401	0	0	K02262//cytochrome c oxidase subunit 3+ko01100//Metabolic pathways+ko00190//Oxidative phosphorylation;K02262//cytochrome c oxidase subunit 3+ko01100//Metabolic pathways+ko00190//Oxidative phosphorylation;K02262//cytochrome c oxidase subunit 3+ko01100//Metabolic pathways+ko00190//Oxidative phosphorylation;K02262//cytochrome c oxidase subunit 3+ko01100//Metabolic pathways+ko00190//Oxidative phospho…	Cytochrome c oxidase subunit III	AB546637.2 Heterosigma akashiwo mitochondrial DNA, complete genome, strain: Y	cytochrome c oxidase subunit 3 (mitochondrion) [Turbinaria ornata] >AJF48260.1 cytochrome c oxidase subunit 3 (mitochondrion) [Turbinaria ornata]	[C] KOG4664 Cytochrome oxidase subunit III and related proteins	Cytochrome c oxidase subunit 3 OS=Pylaiella littoralis GN=COX3 PE=3 SV=1	GO:0019646//aerobic electron transport chain;GO:0004129//cytochrome-c oxidase activity;GO:0016021//integral component of membrane;GO:0005739//mitochondrion
CL106.Contig57_All	929	ko01100//Metabolic pathways;ko00195//Photosynthesis;ko00190//Oxidative phosphorylation	Metabolism	Energy metabolism;Global and overview maps	-2.23595	3.85996e-21	9.42777e-22	K02108//F-type H+-transporting ATPase subunit a+ko01100//Metabolic pathways+ko00190//Oxidative phosphorylation+ko00195//Photosynthesis;K01358//ATP-dependent Clp protease, protease subunit [EC:3.4.21.92]		HG670306.1 Triticum aestivum chromosome 3B, genomic scaffold, cultivar Chinese Spring	hypothetical protein BVRB_041110, partial [Beta vulgaris subsp. vulgaris]
CL6454.Contig2_All	13269	ko00190//Oxidative phosphorylation;ko01100//Metabolic pathways	Metabolism	Global and overview maps;Energy metabolism	-2.26858	0	0	K03934//NADH dehydrogenase (ubiquinone) Fe-S protein 1 [EC:7.1.1.2 1.6.99.3]+ko01100//Metabolic pathways+ko00190//Oxidative phosphorylation;K03934//NADH dehydrogenase (ubiquinone) Fe-S protein 1 [EC:7.1.1.2 1.6.99.3]+ko01100//Metabolic pathways+ko00190//Oxidative phosphorylation;K03934//NADH dehydrogenase (ubiquinone) Fe-S protein 1 [EC:7.1.1.2 1.6.99.3]+ko01100//Metabolic pathways+ko00190//Oxida…	NADH dehydrogenase	GQ222227.1 Heterosigma akashiwo isolate NIES293 mitochondrion, complete genome	NADH dehydrogenase subunit 11 (mitochondrion) [Heterosigma akashiwo]	[C] KOG2282 NADH-ubiquinone oxidoreductase, NDUFS1/75 kDa subunit	NADH-ubiquinone oxidoreductase chain 1 OS=Chondrus crispus GN=ND1 PE=3 SV=1	GO:0009055//electron transfer activity;GO:0016020//membrane;GO:0042773//ATP synthesis coupled electron transport;GO:0005739//mitochondrion;GO:0008137//NADH dehydrogenase (ubiquinone) activity;GO:0051536//iron-sulfur cluster binding
Unigene65854_All	626	ko01100//Metabolic pathways;ko00190//Oxidative phosphorylation	Metabolism	Global and overview maps;Energy metabolism	-2.35633	0.000734003	0.00055213	K11352//NADH dehydrogenase (ubiquinone) 1 alpha subcomplex subunit 12+ko01100//Metabolic pathways+ko00190//Oxidative phosphorylation;K11352//NADH dehydrogenase (ubiquinone) 1 alpha subcomplex subunit 12+ko01100//Metabolic pathways+ko00190//Oxidative phosphorylation;K11352//NADH dehydrogenase (ubiquinone) 1 alpha subcomplex subunit 12+ko01100//Metabolic pathways+ko00190//Oxidative phosphorylation;…	NADH ubiquinone oxidoreductase subunit NDUFA12		NADH:ubiquinone oxidoreductase [Chondrus crispus] >CDF39984.1 NADH:ubiquinone oxidoreductase [Chondrus crispus]	[C] KOG3382 NADH:ubiquinone oxidoreductase, B17.2 subunit	Probable NADH dehydrogenase [ubiquinone] 1 alpha subcomplex subunit 12 OS=Arabidopsis thaliana GN=At3g03100 PE=1 SV=1	GO:0009055//electron transfer activity;GO:0005743//mitochondrial inner membrane;GO:0070469//respiratory chain;GO:0008137//NADH dehydrogenase (ubiquinone) activity
CL106.Contig10_All	3142	ko00190//Oxidative phosphorylation;ko01100//Metabolic pathways;ko00195//Photosynthesis	Metabolism	Energy metabolism;Global and overview maps	-2.43582	1.0419e-252	4.15538e-254	K02108//F-type H+-transporting ATPase subunit a+ko01100//Metabolic pathways+ko00190//Oxidative phosphorylation+ko00195//Photosynthesis;K01358//ATP-dependent Clp protease, protease subunit [EC:3.4.21.92]		KJ410683.1 Nannochloropsis oceanica strain LAMB0001 chloroplast, partial genome	hypothetical protein BVRB_041110, partial [Beta vulgaris subsp. vulgaris]		Uncharacterized protein ORF91 OS=Phalaenopsis aphrodite subsp. formosana PE=4 SV=1
CL106.Contig55_All	865	ko01100//Metabolic pathways;ko00195//Photosynthesis;ko00190//Oxidative phosphorylation	Metabolism	Global and overview maps;Energy metabolism	-2.43888	1.20497e-26	2.526e-27	K02108//F-type H+-transporting ATPase subunit a+ko01100//Metabolic pathways+ko00190//Oxidative phosphorylation+ko00195//Photosynthesis;K01358//ATP-dependent Clp protease, protease subunit [EC:3.4.21.92]		LC269924.1 Heterosigma akashiwo chloroplast DNA, complete genome, isolate: CCMP1596	hypothetical protein BVRB_020780, partial [Beta vulgaris subsp. vulgaris]
CL7919.Contig3_All	1500	ko01100//Metabolic pathways;ko00190//Oxidative phosphorylation;ko00195//Photosynthesis	Metabolism	Global and overview maps;Energy metabolism	-2.48135	4.06367e-95	3.43021e-96	K02115//F-type H+-transporting ATPase subunit gamma+ko01100//Metabolic pathways+ko00190//Oxidative phosphorylation+ko00195//Photosynthesis;K02115//F-type H+-transporting ATPase subunit gamma+ko01100//Metabolic pathways+ko00190//Oxidative phosphorylation+ko00195//Photosynthesis;K02115//F-type H+-transporting ATPase subunit gamma+ko01100//Metabolic pathways+ko00190//Oxidative phosphorylation+ko0019…	ATP synthase		ATP synthase [Thalassiosira pseudonana CCMP1335] >EED92675.1 ATP synthase [Thalassiosira pseudonana CCMP1335]	[C] KOG1531 F0F1-type ATP synthase, gamma subunit	ATP synthase gamma chain, chloroplastic OS=Odontella sinensis GN=ATPC PE=1 SV=1	GO:0015986//ATP synthesis coupled proton transport;GO:0045261//proton-transporting ATP synthase complex, catalytic core F(1);GO:0046933//proton-transporting ATP synthase activity, rotational mechanism
CL6013.Contig2_All	1246	ko00190//Oxidative phosphorylation;ko01100//Metabolic pathways	Metabolism	Global and overview maps;Energy metabolism	-2.52626	1.43514e-07	6.90574e-08	K02133//F-type H+-transporting ATPase subunit beta [EC:7.1.2.2]+ko01100//Metabolic pathways+ko00190//Oxidative phosphorylation;K02133//F-type H+-transporting ATPase subunit beta [EC:7.1.2.2]+ko01100//Metabolic pathways+ko00190//Oxidative phosphorylation;K02133//F-type H+-transporting ATPase subunit beta [EC:7.1.2.2]+ko01100//Metabolic pathways+ko00190//Oxidative phosphorylation;K02133//F-type H+-…	ATP synthase alpha/beta family, nucleotide-binding domain	EU380550.1 Micromonas sp. SYD ATP synthase beta subunit (atpB) gene, partial cds; plastid	hypothetical protein COCSUDRAFT_48882 [Coccomyxa subellipsoidea C-169] >EIE19260.1 hypothetical protein COCSUDRAFT_48882 [Coccomyxa subellipsoidea C-169]	[C] KOG1350 F0F1-type ATP synthase, beta subunit	ATP synthase subunit beta, mitochondrial OS=Chlamydomonas reinhardtii GN=ATP2 PE=1 SV=1	GO:0015986//ATP synthesis coupled proton transport;GO:0045261//proton-transporting ATP synthase complex, catalytic core F(1);GO:0005524//ATP binding;GO:0000275//mitochondrial proton-transporting ATP synthase complex, catalytic core F(1);GO:0046933//proton-transporting ATP synthase activity, rotational mechanism
Unigene16699_All	1368	ko01110//Biosynthesis of secondary metabolites;ko01200//Carbon metabolism;ko01100//Metabolic pathways;ko00020//Citrate cycle (TCA cycle);ko00190//Oxidative phosphorylation	Metabolism	Global and overview maps;Energy metabolism;Carbohydrate metabolism	-2.60325	3.83494e-14	1.23092e-14	K00234//succinate dehydrogenase (ubiquinone) flavoprotein subunit [EC:1.3.5.1]+ko00020//Citrate cycle (TCA cycle)+ko01100//Metabolic pathways+ko00190//Oxidative phosphorylation+ko01110//Biosynthesis of secondary metabolites+ko01200//Carbon metabolism;K00234//succinate dehydrogenase (ubiquinone) flavoprotein subunit [EC:1.3.5.1]+ko00020//Citrate cycle (TCA cycle)+ko01100//Metabolic pathways+ko0019…	FAD binding domain		NADH-dependent fumarate reductase [Ectocarpus siliculosus]	[C] KOG2403 Succinate dehydrogenase, flavoprotein subunit	Succinate dehydrogenase [ubiquinone] flavoprotein subunit 1, mitochondrial OS=Arabidopsis thaliana GN=SDH1-1 PE=1 SV=1	GO:0000104//succinate dehydrogenase activity
CL106.Contig42_All	3557	ko00190//Oxidative phosphorylation;ko00195//Photosynthesis;ko01100//Metabolic pathways	Metabolism	Global and overview maps;Energy metabolism	-2.62946	7.4964e-130	5.09152e-131	K02108//F-type H+-transporting ATPase subunit a+ko01100//Metabolic pathways+ko00190//Oxidative phosphorylation+ko00195//Photosynthesis;K01358//ATP-dependent Clp protease, protease subunit [EC:3.4.21.92]		HG670306.1 Triticum aestivum chromosome 3B, genomic scaffold, cultivar Chinese Spring	cell wall-associated hydrolase [Phaseolus vulgaris]		Uncharacterized protein ORF91 OS=Phalaenopsis aphrodite subsp. formosana PE=4 SV=1
Unigene5519_All	3705	ko01100//Metabolic pathways;ko03010//Ribosome;ko00190//Oxidative phosphorylation;ko00195//Photosynthesis	Genetic Information Processing;Metabolism	Energy metabolism;Global and overview maps;Translation	-2.65548	1.53877e-131	1.03429e-132	K02108//F-type H+-transporting ATPase subunit a+ko01100//Metabolic pathways+ko00190//Oxidative phosphorylation+ko00195//Photosynthesis;K01358//ATP-dependent Clp protease, protease subunit [EC:3.4.21.92];K02948//small subunit ribosomal protein S11+ko03010//Ribosome		KX284721.2 Erythrotrichia carnea plastid, complete genome	hypothetical protein BVRB_041110, partial [Beta vulgaris subsp. vulgaris]		Uncharacterized protein ORF91 OS=Phalaenopsis aphrodite subsp. formosana PE=4 SV=1
CL106.Contig12_All	3120	ko00190//Oxidative phosphorylation;ko00195//Photosynthesis;ko01100//Metabolic pathways	Metabolism	Global and overview maps;Energy metabolism	-2.66661	0	0	K02108//F-type H+-transporting ATPase subunit a+ko01100//Metabolic pathways+ko00190//Oxidative phosphorylation+ko00195//Photosynthesis		HG670306.1 Triticum aestivum chromosome 3B, genomic scaffold, cultivar Chinese Spring	cell wall-associated hydrolase, partial [Phaeodactylum tricornutum]		Uncharacterized protein ORF91 OS=Phalaenopsis aphrodite subsp. formosana PE=4 SV=1
Unigene71995_All	1285	ko01100//Metabolic pathways;ko00190//Oxidative phosphorylation	Metabolism	Energy metabolism;Global and overview maps	-2.75687	2.36979e-06	1.27901e-06	K02133//F-type H+-transporting ATPase subunit beta [EC:7.1.2.2]+ko01100//Metabolic pathways+ko00190//Oxidative phosphorylation;K02133//F-type H+-transporting ATPase subunit beta [EC:7.1.2.2]+ko01100//Metabolic pathways+ko00190//Oxidative phosphorylation;K02133//F-type H+-transporting ATPase subunit beta [EC:7.1.2.2]+ko01100//Metabolic pathways+ko00190//Oxidative phosphorylation;K02133//F-type H+-…	ATP synthase	XM_009040827.1 Aureococcus anophagefferens hypothetical protein partial mRNA	predicted protein [Hordeum vulgare subsp. vulgare] >KEQ82091.1 ATP synthase F1, beta subunit [Aureobasidium pullulans EXF-150] >OBW67001.1 Uncharacterized protein AUREO_029370 [Aureobasidium pullulans]	[C] KOG1350 F0F1-type ATP synthase, beta subunit	ATP synthase subunit beta, mitochondrial OS=Oryza sativa subsp. japonica GN=ATPB PE=1 SV=2	GO:0015986//ATP synthesis coupled proton transport;GO:0045261//proton-transporting ATP synthase complex, catalytic core F(1);GO:0005524//ATP binding;GO:0000275//mitochondrial proton-transporting ATP synthase complex, catalytic core F(1);GO:0046933//proton-transporting ATP synthase activity, rotational mechanism
Unigene57182_All	2836	ko01200//Carbon metabolism;ko01110//Biosynthesis of secondary metabolites;ko00190//Oxidative phosphorylation;ko00020//Citrate cycle (TCA cycle);ko01100//Metabolic pathways	Metabolism	Carbohydrate metabolism;Energy metabolism;Global and overview maps	-2.77763	3.8514e-25	8.36965e-26	K00234//succinate dehydrogenase (ubiquinone) flavoprotein subunit [EC:1.3.5.1]+ko00020//Citrate cycle (TCA cycle)+ko01100//Metabolic pathways+ko00190//Oxidative phosphorylation+ko01110//Biosynthesis of secondary metabolites+ko01200//Carbon metabolism;K00234//succinate dehydrogenase (ubiquinone) flavoprotein subunit [EC:1.3.5.1]+ko00020//Citrate cycle (TCA cycle)+ko01100//Metabolic pathways+ko0019…	FAD binding domain	XM_009534609.1 Phytophthora sojae hypothetical protein partial mRNA	succinate dehydrogenase subunit A, mitochondrial [Volvox carteri f. nagariensis] >EFJ49184.1 succinate dehydrogenase subunit A, mitochondrial [Volvox carteri f. nagariensis]	[C] KOG2403 Succinate dehydrogenase, flavoprotein subunit	Succinate dehydrogenase [ubiquinone] flavoprotein subunit 1, mitochondrial OS=Arabidopsis thaliana GN=SDH1-1 PE=1 SV=1	GO:0009055//electron transfer activity;GO:0005524//ATP binding;GO:0006121//mitochondrial electron transport, succinate to ubiquinone;GO:0050660//flavin adenine dinucleotide binding;GO:0050897//cobalt ion binding;GO:0045273//respiratory chain complex II;GO:0006099//tricarboxylic acid cycle;GO:0022900//electron transport chain;GO:0000104//succinate dehydrogenase activity;GO:0005749//mitochondrial r…
CL106.Contig16_All	3220	ko01100//Metabolic pathways;ko00190//Oxidative phosphorylation;ko00195//Photosynthesis	Metabolism	Global and overview maps;Energy metabolism	-2.77973	0	0	K02108//F-type H+-transporting ATPase subunit a+ko01100//Metabolic pathways+ko00190//Oxidative phosphorylation+ko00195//Photosynthesis;K01358//ATP-dependent Clp protease, protease subunit [EC:3.4.21.92]		KJ410683.1 Nannochloropsis oceanica strain LAMB0001 chloroplast, partial genome	hypothetical protein BVRB_041110, partial [Beta vulgaris subsp. vulgaris]		Uncharacterized protein ORF91 OS=Phalaenopsis aphrodite subsp. formosana PE=4 SV=1
CL106.Contig36_All	2851	ko00190//Oxidative phosphorylation;ko00195//Photosynthesis;ko01100//Metabolic pathways	Metabolism	Energy metabolism;Global and overview maps	-2.82231	3.08e-98	2.54537e-99	K02108//F-type H+-transporting ATPase subunit a+ko01100//Metabolic pathways+ko00190//Oxidative phosphorylation+ko00195//Photosynthesis;K01358//ATP-dependent Clp protease, protease subunit [EC:3.4.21.92]		KX284728.2 Rhodochaete parvula plastid, complete genome	hypothetical protein BVRB_041110, partial [Beta vulgaris subsp. vulgaris]		Uncharacterized protein ORF91 OS=Phalaenopsis aphrodite subsp. formosana PE=4 SV=1
Unigene25529_All	2176	ko00190//Oxidative phosphorylation;ko01100//Metabolic pathways	Metabolism	Global and overview maps;Energy metabolism	-2.87135	1.2825e-20	3.18557e-21	K02132//F-type H+-transporting ATPase subunit alpha+ko01100//Metabolic pathways+ko00190//Oxidative phosphorylation;K02132//F-type H+-transporting ATPase subunit alpha+ko01100//Metabolic pathways+ko00190//Oxidative phosphorylation;K02132//F-type H+-transporting ATPase subunit alpha+ko01100//Metabolic pathways+ko00190//Oxidative phosphorylation;K02132//F-type H+-transporting ATPase subunit alpha+ko…	ATP synthase alpha/beta family, nucleotide-binding domain	XM_004253314.1 PREDICTED: Solanum lycopersicum ATP synthase subunit alpha (LOC101255871), mRNA	PREDICTED: uncharacterized protein LOC101255871 [Solanum lycopersicum]	[C] KOG1353 F0F1-type ATP synthase, alpha subunit	ATP synthase subunit alpha, mitochondrial OS=Glycine max GN=ATPA PE=3 SV=1	GO:0015986//ATP synthesis coupled proton transport;GO:0045261//proton-transporting ATP synthase complex, catalytic core F(1);GO:0005524//ATP binding;GO:0005739//mitochondrion;GO:0046933//proton-transporting ATP synthase activity, rotational mechanism
CL106.Contig28_All	3327	ko00190//Oxidative phosphorylation;ko01100//Metabolic pathways	Metabolism	Global and overview maps;Energy metabolism	-2.90508	0	0	K02262//cytochrome c oxidase subunit 3+ko01100//Metabolic pathways+ko00190//Oxidative phosphorylation;K02262//cytochrome c oxidase subunit 3+ko01100//Metabolic pathways+ko00190//Oxidative phosphorylation;K02262//cytochrome c oxidase subunit 3+ko01100//Metabolic pathways+ko00190//Oxidative phosphorylation;K02262//cytochrome c oxidase subunit 3+ko01100//Metabolic pathways+ko00190//Oxidative phospho…	Cytochrome c oxidase subunit III	KU561548.1 Heterosigma akashiwo strain Ha00_17 isolate SecD mitochondrion, complete genome	cytochrome c oxidase subunit 3 (mitochondrion) [Turbinaria ornata] >AJF48260.1 cytochrome c oxidase subunit 3 (mitochondrion) [Turbinaria ornata]	[C] KOG4664 Cytochrome oxidase subunit III and related proteins	Cytochrome c oxidase subunit 3 OS=Pylaiella littoralis GN=COX3 PE=3 SV=1	GO:0019646//aerobic electron transport chain;GO:0004129//cytochrome-c oxidase activity;GO:0016021//integral component of membrane;GO:0005739//mitochondrion
CL10954.Contig2_All	3126	ko00190//Oxidative phosphorylation	Metabolism	Energy metabolism	-2.93547	5.86048e-278	2.1452e-279	K01535//H+-transporting ATPase [EC:7.1.2.1]+ko00190//Oxidative phosphorylation;K01535//H+-transporting ATPase [EC:7.1.2.1]+ko00190//Oxidative phosphorylation;K01535//H+-transporting ATPase [EC:7.1.2.1]+ko00190//Oxidative phosphorylation;K01535//H+-transporting ATPase [EC:7.1.2.1]+ko00190//Oxidative phosphorylation	E1-E2 ATPase	D26471.1 Heterosigma akashiwo mRNA for P-type ATPase	plasma membrane h+ atpase [Klebsormidium nitens]	[P] KOG0205 Plasma membrane H+-transporting ATPase	Plasma membrane ATPase OS=Oryza sativa subsp. japonica GN=Os04g0656100 PE=2 SV=1	GO:0006754//ATP biosynthetic process;GO:0005524//ATP binding;GO:0016021//integral component of membrane;GO:0008553//hydrogen-exporting ATPase activity, phosphorylative mechanism
Unigene43289_All	381	ko00190//Oxidative phosphorylation;ko00195//Photosynthesis;ko01100//Metabolic pathways	Metabolism	Global and overview maps;Energy metabolism	-2.9413	1.15618e-08	5.09813e-09	K02113//F-type H+-transporting ATPase subunit delta+ko01100//Metabolic pathways+ko00190//Oxidative phosphorylation+ko00195//Photosynthesis;K02113//F-type H+-transporting ATPase subunit delta+ko01100//Metabolic pathways+ko00190//Oxidative phosphorylation+ko00195//Photosynthesis;K02113//F-type H+-transporting ATPase subunit delta+ko01100//Metabolic pathways+ko00190//Oxidative phosphorylation+ko0019…	Protein of unknown function (DUF4079)		F-type H+-transporting ATPase subunit delta [Monoraphidium neglectum] >KIY92405.1 F-type H+-transporting ATPase subunit delta [Monoraphidium neglectum]		ATP synthase delta chain, chloroplastic OS=Chlamydomonas reinhardtii GN=ATPD PE=1 SV=1	GO:0015986//ATP synthesis coupled proton transport;GO:0016020//membrane;GO:0046933//proton-transporting ATP synthase activity, rotational mechanism
Unigene70720_All	1197	ko01100//Metabolic pathways;ko00190//Oxidative phosphorylation	Metabolism	Energy metabolism;Global and overview maps	-2.9413	3.33164e-06	1.8281e-06	K00412//ubiquinol-cytochrome c reductase cytochrome b subunit+ko01100//Metabolic pathways+ko00190//Oxidative phosphorylation;K00412//ubiquinol-cytochrome c reductase cytochrome b subunit+ko01100//Metabolic pathways+ko00190//Oxidative phosphorylation;K00412//ubiquinol-cytochrome c reductase cytochrome b subunit+ko01100//Metabolic pathways+ko00190//Oxidative phosphorylation;K00412//ubiquinol-cytoch…	Cytochrome b/b6/petB	FP093688.1 Phyllostachys edulis cDNA clone: bphylf034n07, full insert sequence	cytochrome b, partial (mitochondrion) [Glaucocystis nostochinearum]	[C] KOG4663 Cytochrome b	Cytochrome b OS=Arabidopsis thaliana GN=MT-CYB PE=2 SV=2	GO:0046872//metal ion binding;GO:0008121//ubiquinol-cytochrome-c reductase activity;GO:0045275//respiratory chain complex III;GO:0005743//mitochondrial inner membrane;GO:0006122//mitochondrial electron transport, ubiquinol to cytochrome c
CL8539.Contig2_All	869	ko00190//Oxidative phosphorylation;ko01100//Metabolic pathways	Metabolism	Energy metabolism;Global and overview maps	-2.9886	1.90238e-06	1.0176e-06	K02128//F-type H+-transporting ATPase subunit c+ko01100//Metabolic pathways+ko00190//Oxidative phosphorylation;K02128//F-type H+-transporting ATPase subunit c+ko01100//Metabolic pathways+ko00190//Oxidative phosphorylation;K02128//F-type H+-transporting ATPase subunit c+ko01100//Metabolic pathways+ko00190//Oxidative phosphorylation;K02128//F-type H+-transporting ATPase subunit c+ko01100//Metabolic…			ATP synthase subunit 9 (mitochondrion) [Isoetes engelmannii]	[C] LSE2019 A ATPase subunit 9, and related proteins	ATP synthase subunit 9, mitochondrial OS=Arabidopsis thaliana GN=ATP9 PE=2 SV=2	GO:0015986//ATP synthesis coupled proton transport;GO:0008289//lipid binding;GO:0015991//ATP hydrolysis coupled proton transport;GO:0045263//proton-transporting ATP synthase complex, coupling factor F(o);GO:0016021//integral component of membrane;GO:0015078//hydrogen ion transmembrane transporter activity;GO:0031966//mitochondrial membrane
Unigene74745_All	1505	ko00190//Oxidative phosphorylation;ko01100//Metabolic pathways	Metabolism	Global and overview maps;Energy metabolism	-2.99376	5.7846e-13	1.95932e-13	K02126//F-type H+-transporting ATPase subunit a+ko01100//Metabolic pathways+ko00190//Oxidative phosphorylation;K02126//F-type H+-transporting ATPase subunit a+ko01100//Metabolic pathways+ko00190//Oxidative phosphorylation;K02126//F-type H+-transporting ATPase subunit a+ko01100//Metabolic pathways+ko00190//Oxidative phosphorylation;K02126//F-type H+-transporting ATPase subunit a+ko01100//Metabolic…	ATP synthase A chain		ATP synthase F0 subunit 6 (mitochondrion) [Trebouxia aggregata]	[C] KOG4665 ATP synthase F0 subunit 6 and related proteins	ATP synthase subunit a OS=Oenothera berteroana GN=ATP6 PE=2 SV=2	GO:0015986//ATP synthesis coupled proton transport;GO:0045263//proton-transporting ATP synthase complex, coupling factor F(o);GO:0005743//mitochondrial inner membrane;GO:0016021//integral component of membrane;GO:0015078//hydrogen ion transmembrane transporter activity
CL106.Contig4_All	2917	ko00190//Oxidative phosphorylation;ko01100//Metabolic pathways;ko00195//Photosynthesis	Metabolism	Energy metabolism;Global and overview maps	-3.033	0	0	K02108//F-type H+-transporting ATPase subunit a+ko01100//Metabolic pathways+ko00190//Oxidative phosphorylation+ko00195//Photosynthesis;K01358//ATP-dependent Clp protease, protease subunit [EC:3.4.21.92]		KJ410683.1 Nannochloropsis oceanica strain LAMB0001 chloroplast, partial genome	hypothetical protein BVRB_041110, partial [Beta vulgaris subsp. vulgaris]		Uncharacterized protein ORF91 OS=Phalaenopsis aphrodite subsp. formosana PE=4 SV=1
CL10778.Contig5_All	4915	ko01100//Metabolic pathways;ko00190//Oxidative phosphorylation	Metabolism	Energy metabolism;Global and overview maps	-3.07432	6.04288e-26	1.28841e-26	K02133//F-type H+-transporting ATPase subunit beta [EC:7.1.2.2]+ko01100//Metabolic pathways+ko00190//Oxidative phosphorylation;K02133//F-type H+-transporting ATPase subunit beta [EC:7.1.2.2]+ko01100//Metabolic pathways+ko00190//Oxidative phosphorylation;K02133//F-type H+-transporting ATPase subunit beta [EC:7.1.2.2]+ko01100//Metabolic pathways+ko00190//Oxidative phosphorylation;K02133//F-type H+-…	ATP synthase	XM_009040827.1 Aureococcus anophagefferens hypothetical protein partial mRNA	PREDICTED: uncharacterized protein LOC101255871 [Solanum lycopersicum]	[C] KOG1350 F0F1-type ATP synthase, beta subunit	ATP synthase subunit beta, mitochondrial OS=Zea mays GN=ATPB PE=2 SV=1
Unigene44672_All	3152	ko00190//Oxidative phosphorylation;ko00860//Porphyrin and chlorophyll metabolism;ko01110//Biosynthesis of secondary metabolites;ko01100//Metabolic pathways	Metabolism	Energy metabolism;Metabolism of cofactors and vitamins;Global and overview maps	-3.09028	0	0	K02259//cytochrome c oxidase assembly protein subunit 15+ko00860//Porphyrin and chlorophyll metabolism+ko01100//Metabolic pathways+ko00190//Oxidative phosphorylation+ko01110//Biosynthesis of secondary metabolites;K02259//cytochrome c oxidase assembly protein subunit 15+ko00860//Porphyrin and chlorophyll metabolism+ko01100//Metabolic pathways+ko00190//Oxidative phosphorylation+ko01110//Biosynthesi…	Cytochrome oxidase assembly protein		predicted protein [Hordeum vulgare subsp. vulgare] >BAK03513.1 predicted protein [Hordeum vulgare subsp. vulgare]	[O] KOG2725 Cytochrome oxidase assembly factor COX15	Cytochrome c oxidase assembly protein COX15 OS=Arabidopsis thaliana GN=COX15 PE=2 SV=1	GO:0016627//oxidoreductase activity, acting on the CH-CH group of donors;GO:0006784//heme a biosynthetic process;GO:0005743//mitochondrial inner membrane;GO:0016021//integral component of membrane
Unigene27576_All	1533	ko00190//Oxidative phosphorylation;ko01100//Metabolic pathways	Metabolism	Global and overview maps;Energy metabolism	-3.18125	3.13273e-12	1.10319e-12	K02262//cytochrome c oxidase subunit 3+ko01100//Metabolic pathways+ko00190//Oxidative phosphorylation;K02262//cytochrome c oxidase subunit 3+ko01100//Metabolic pathways+ko00190//Oxidative phosphorylation;K02262//cytochrome c oxidase subunit 3+ko01100//Metabolic pathways+ko00190//Oxidative phosphorylation;K02262//cytochrome c oxidase subunit 3+ko01100//Metabolic pathways+ko00190//Oxidative phospho…	Prokaryotic Cytochrome C oxidase subunit IV		cytochrome c oxidase subunit 3 (mitochondrion) [Pyropia yezoensis] >AFH57683.1 cytochrome c oxidase subunit 3 (mitochondrion) [Pyropia yezoensis] >AGZ17879.1 cytochrome c oxidase subunit 3 (mitochondrion) [Pyropia yezoensis]	[C] KOG4664 Cytochrome oxidase subunit III and related proteins	Cytochrome c oxidase subunit 3 OS=Marchantia polymorpha GN=COX3 PE=3 SV=2	GO:0019646//aerobic electron transport chain;GO:0004129//cytochrome-c oxidase activity;GO:0016021//integral component of membrane;GO:0005739//mitochondrion
Unigene9208_All	2211	ko00190//Oxidative phosphorylation;ko00195//Photosynthesis;ko01100//Metabolic pathways	Metabolism	Energy metabolism;Global and overview maps	-3.20415	3.35436e-103	2.68171e-104	K02108//F-type H+-transporting ATPase subunit a+ko01100//Metabolic pathways+ko00190//Oxidative phosphorylation+ko00195//Photosynthesis;K01358//ATP-dependent Clp protease, protease subunit [EC:3.4.21.92];K22020//mucin-19	Recombinase zinc beta ribbon domain	HG670306.1 Triticum aestivum chromosome 3B, genomic scaffold, cultivar Chinese Spring	hypothetical protein BVRB_020780, partial [Beta vulgaris subsp. vulgaris]		Uncharacterized protein ORF91 OS=Phalaenopsis aphrodite subsp. formosana PE=4 SV=1
CL1745.Contig3_All	2201	ko01100//Metabolic pathways;ko00190//Oxidative phosphorylation	Metabolism	Energy metabolism;Global and overview maps	-3.2182	1.29667e-38	2.09338e-39	K03940//NADH dehydrogenase (ubiquinone) Fe-S protein 7 [EC:7.1.1.2 1.6.99.3]+ko01100//Metabolic pathways+ko00190//Oxidative phosphorylation;K03940//NADH dehydrogenase (ubiquinone) Fe-S protein 7 [EC:7.1.1.2 1.6.99.3]+ko01100//Metabolic pathways+ko00190//Oxidative phosphorylation;K03940//NADH dehydrogenase (ubiquinone) Fe-S protein 7 [EC:7.1.1.2 1.6.99.3]+ko01100//Metabolic pathways+ko00190//Oxida…	Respiratory-chain NADH dehydrogenase, 30 Kd subunit	XM_009535048.1 Phytophthora sojae hypothetical protein mRNA	NADH dehydrogenase subunit 10 (mitochondrion) [Nephroselmis olivacea] >AAF03193.1 NADH dehydrogenase subunit 10 (mitochondrion) [Nephroselmis olivacea]	[C] KOG1687 NADH-ubiquinone oxidoreductase, NUFS7/PSST/20 kDa subunit	NADH dehydrogenase [ubiquinone] iron-sulfur protein 7, mitochondrial OS=Arabidopsis thaliana GN=At5g11770 PE=1 SV=1	GO:0046872//metal ion binding;GO:0005747//mitochondrial respiratory chain complex I;GO:0008270//zinc ion binding;GO:0051539//4 iron, 4 sulfur cluster binding;GO:0048038//quinone binding;GO:0005739//mitochondrion;GO:0008137//NADH dehydrogenase (ubiquinone) activity
CL106.Contig6_All	2422	ko01100//Metabolic pathways;ko00190//Oxidative phosphorylation;ko00195//Photosynthesis	Metabolism	Global and overview maps;Energy metabolism	-3.30836	5.30306e-128	3.63275e-129	K02108//F-type H+-transporting ATPase subunit a+ko01100//Metabolic pathways+ko00190//Oxidative phosphorylation+ko00195//Photosynthesis;K01358//ATP-dependent Clp protease, protease subunit [EC:3.4.21.92]		KJ410683.1 Nannochloropsis oceanica strain LAMB0001 chloroplast, partial genome	hypothetical protein BVRB_041110, partial [Beta vulgaris subsp. vulgaris]		Uncharacterized protein ORF91 OS=Phalaenopsis aphrodite subsp. formosana PE=4 SV=1
Unigene57306_All	1404	ko00190//Oxidative phosphorylation;ko01100//Metabolic pathways	Metabolism	Global and overview maps;Energy metabolism	-3.31628	4.60421e-10	1.84629e-10	K02133//F-type H+-transporting ATPase subunit beta [EC:7.1.2.2]+ko01100//Metabolic pathways+ko00190//Oxidative phosphorylation;K02133//F-type H+-transporting ATPase subunit beta [EC:7.1.2.2]+ko01100//Metabolic pathways+ko00190//Oxidative phosphorylation;K02133//F-type H+-transporting ATPase subunit beta [EC:7.1.2.2]+ko01100//Metabolic pathways+ko00190//Oxidative phosphorylation;K02133//F-type H+-…	ATP synthase alpha/beta family, nucleotide-binding domain	XM_005643747.1 Coccomyxa subellipsoidea C-169 hypothetical protein partial mRNA	F0F1-type ATP synthase beta subunit [Klebsormidium nitens]	[C] KOG1350 F0F1-type ATP synthase, beta subunit	ATP synthase subunit beta, mitochondrial OS=Chlamydomonas reinhardtii GN=ATP2 PE=1 SV=1	GO:0015986//ATP synthesis coupled proton transport;GO:0045261//proton-transporting ATP synthase complex, catalytic core F(1);GO:0005524//ATP binding;GO:0046933//proton-transporting ATP synthase activity, rotational mechanism
CL106.Contig33_All	2625	ko00195//Photosynthesis;ko00190//Oxidative phosphorylation;ko01100//Metabolic pathways	Metabolism	Energy metabolism;Global and overview maps	-3.34137	0	0	K02108//F-type H+-transporting ATPase subunit a+ko01100//Metabolic pathways+ko00190//Oxidative phosphorylation+ko00195//Photosynthesis		AK107373.1 Oryza sativa Japonica Group cDNA clone:002-127-B06, full insert sequence	hypothetical protein BVRB_020780, partial [Beta vulgaris subsp. vulgaris]		Uncharacterized protein ORF91 OS=Phalaenopsis aphrodite subsp. formosana PE=4 SV=1
Unigene26101_All	2602	ko01100//Metabolic pathways;ko00190//Oxidative phosphorylation	Metabolism	Global and overview maps;Energy metabolism	-3.35126	1.75122e-106	1.36447e-107	K02126//F-type H+-transporting ATPase subunit a+ko01100//Metabolic pathways+ko00190//Oxidative phosphorylation;K02126//F-type H+-transporting ATPase subunit a+ko01100//Metabolic pathways+ko00190//Oxidative phosphorylation;K02126//F-type H+-transporting ATPase subunit a+ko01100//Metabolic pathways+ko00190//Oxidative phosphorylation;K02126//F-type H+-transporting ATPase subunit a+ko01100//Metabolic…	ATP synthase A chain		ATP synthase F0 subunit 6 (mitochondrion) [Monomastix sp. OKE-1] >AGZ90191.1 ATP synthase F0 subunit 6 (mitochondrion) [Monomastix sp. OKE-1]	[C] KOG4665 ATP synthase F0 subunit 6 and related proteins	ATP synthase subunit a OS=Marchantia polymorpha GN=ATP6 PE=3 SV=2	GO:0015986//ATP synthesis coupled proton transport;GO:0045263//proton-transporting ATP synthase complex, coupling factor F(o);GO:0005743//mitochondrial inner membrane;GO:0016021//integral component of membrane;GO:0015078//hydrogen ion transmembrane transporter activity
Unigene61448_All	742	ko01100//Metabolic pathways;ko00190//Oxidative phosphorylation	Metabolism	Energy metabolism;Global and overview maps	-3.40364	4.39469e-07	2.21031e-07	K02132//F-type H+-transporting ATPase subunit alpha+ko01100//Metabolic pathways+ko00190//Oxidative phosphorylation;K02132//F-type H+-transporting ATPase subunit alpha+ko01100//Metabolic pathways+ko00190//Oxidative phosphorylation;K02132//F-type H+-transporting ATPase subunit alpha+ko01100//Metabolic pathways+ko00190//Oxidative phosphorylation;K02132//F-type H+-transporting ATPase subunit alpha+ko…	ATP synthase alpha/beta family, nucleotide-binding domain	KT428890.1 Guillardia theta voucher CCMP:2712 chloroplast, complete genome	hypothetical protein SOVF_209290, partial [Spinacia oleracea]	[C] KOG1353 F0F1-type ATP synthase, alpha subunit	ATP synthase subunit alpha, chloroplastic OS=Rhodomonas salina GN=atpA PE=3 SV=1	GO:0015986//ATP synthesis coupled proton transport;GO:0045261//proton-transporting ATP synthase complex, catalytic core F(1);GO:0005524//ATP binding;GO:0005739//mitochondrion;GO:0046933//proton-transporting ATP synthase activity, rotational mechanism
Unigene69168_All	667	ko00190//Oxidative phosphorylation;ko01100//Metabolic pathways	Metabolism	Energy metabolism;Global and overview maps	-3.40364	1.0833e-18	2.87837e-19	K03937//NADH dehydrogenase (ubiquinone) Fe-S protein 4+ko01100//Metabolic pathways+ko00190//Oxidative phosphorylation;K03937//NADH dehydrogenase (ubiquinone) Fe-S protein 4+ko01100//Metabolic pathways+ko00190//Oxidative phosphorylation;K03937//NADH dehydrogenase (ubiquinone) Fe-S protein 4+ko01100//Metabolic pathways+ko00190//Oxidative phosphorylation;K03937//NADH dehydrogenase (ubiquinone) Fe-S …	ETC complex I subunit conserved region		PREDICTED: NADH dehydrogenase [ubiquinone] iron-sulfur protein 4, mitochondrial [Daucus carota subsp. sativus]	[C] KOG3389 NADH:ubiquinone oxidoreductase, NDUFS4/18 kDa subunit	NADH dehydrogenase [ubiquinone] iron-sulfur protein 4, mitochondrial OS=Arabidopsis thaliana GN=FRO1 PE=1 SV=1	GO:0022900//electron transport chain;GO:0016651//oxidoreductase activity, acting on NAD(P)H
CL106.Contig46_All	2626	ko00195//Photosynthesis;ko00190//Oxidative phosphorylation;ko01100//Metabolic pathways	Metabolism	Energy metabolism;Global and overview maps	-3.41723	1.13947e-163	6.4398e-165	K02108//F-type H+-transporting ATPase subunit a+ko01100//Metabolic pathways+ko00190//Oxidative phosphorylation+ko00195//Photosynthesis;K01358//ATP-dependent Clp protease, protease subunit [EC:3.4.21.92]		KU726247.1 Heterosigma akashiwo isolate NEPCC522 mitochondrion, complete genome	cell wall-associated hydrolase, partial [Phaeodactylum tricornutum]		Uncharacterized protein ORF91 OS=Phalaenopsis aphrodite subsp. formosana PE=4 SV=1
CL4949.Contig1_All	879	ko01100//Metabolic pathways;ko00190//Oxidative phosphorylation;ko00020//Citrate cycle (TCA cycle);ko01200//Carbon metabolism;ko01110//Biosynthesis of secondary metabolites	Metabolism	Energy metabolism;Global and overview maps;Carbohydrate metabolism	-3.44948	6.96272e-46	9.96783e-47	K00234//succinate dehydrogenase (ubiquinone) flavoprotein subunit [EC:1.3.5.1]+ko00020//Citrate cycle (TCA cycle)+ko01100//Metabolic pathways+ko00190//Oxidative phosphorylation+ko01110//Biosynthesis of secondary metabolites+ko01200//Carbon metabolism;K00234//succinate dehydrogenase (ubiquinone) flavoprotein subunit [EC:1.3.5.1]+ko00020//Citrate cycle (TCA cycle)+ko01100//Metabolic pathways+ko0019…	FAD binding domain		NADH-dependent fumarate reductase [Ectocarpus siliculosus]	[C] KOG2404 Fumarate reductase, flavoprotein subunit	Succinate dehydrogenase [ubiquinone] flavoprotein subunit 1, mitochondrial OS=Arabidopsis thaliana GN=SDH1-1 PE=1 SV=1	GO:0000104//succinate dehydrogenase activity
CL10778.Contig2_All	4933	ko00190//Oxidative phosphorylation;ko01100//Metabolic pathways	Metabolism	Global and overview maps;Energy metabolism	-3.48576	5.27309e-139	3.40859e-140	K02133//F-type H+-transporting ATPase subunit beta [EC:7.1.2.2]+ko01100//Metabolic pathways+ko00190//Oxidative phosphorylation;K02133//F-type H+-transporting ATPase subunit beta [EC:7.1.2.2]+ko01100//Metabolic pathways+ko00190//Oxidative phosphorylation;K02133//F-type H+-transporting ATPase subunit beta [EC:7.1.2.2]+ko01100//Metabolic pathways+ko00190//Oxidative phosphorylation;K02133//F-type H+-…	ATP synthase	XM_009040827.1 Aureococcus anophagefferens hypothetical protein partial mRNA	PREDICTED: uncharacterized protein LOC101255871 [Solanum lycopersicum]	[C] KOG1350 F0F1-type ATP synthase, beta subunit	ATP synthase subunit beta, mitochondrial OS=Zea mays GN=ATPB PE=2 SV=1
CL106.Contig21_All	928	ko00195//Photosynthesis;ko01100//Metabolic pathways;ko00190//Oxidative phosphorylation	Metabolism	Energy metabolism;Global and overview maps	-3.5375	4.03098e-37	6.71687e-38	K02108//F-type H+-transporting ATPase subunit a+ko01100//Metabolic pathways+ko00190//Oxidative phosphorylation+ko00195//Photosynthesis		HG670306.1 Triticum aestivum chromosome 3B, genomic scaffold, cultivar Chinese Spring	cell wall-associated hydrolase, partial [Phaeodactylum tricornutum]
CL4016.Contig2_All	1540	ko01100//Metabolic pathways;ko00190//Oxidative phosphorylation	Metabolism	Energy metabolism;Global and overview maps	-3.54579	6.76299e-08	3.17172e-08	K03941//NADH dehydrogenase (ubiquinone) Fe-S protein 8 [EC:7.1.1.2 1.6.99.3]+ko01100//Metabolic pathways+ko00190//Oxidative phosphorylation;K03941//NADH dehydrogenase (ubiquinone) Fe-S protein 8 [EC:7.1.1.2 1.6.99.3]+ko01100//Metabolic pathways+ko00190//Oxidative phosphorylation;K03941//NADH dehydrogenase (ubiquinone) Fe-S protein 8 [EC:7.1.1.2 1.6.99.3]+ko01100//Metabolic pathways+ko00190//Oxida…	NADH dehydrogenase	XM_005850077.1 Chlorella variabilis hypothetical protein (CHLNCDRAFT_20716) mRNA, partial cds	PREDICTED: NADH dehydrogenase [ubiquinone] iron-sulfur protein 8-B, mitochondrial-like [Populus euphratica]	[C] KOG3256 NADH:ubiquinone oxidoreductase, NDUFS8/23 kDa subunit	NADH dehydrogenase [ubiquinone] iron-sulfur protein 8-B, mitochondrial OS=Arabidopsis thaliana GN=At1g16700 PE=1 SV=1	GO:0016020//membrane;GO:0016651//oxidoreductase activity, acting on NAD(P)H;GO:0051539//4 iron, 4 sulfur cluster binding;GO:0016021//integral component of membrane;GO:0005739//mitochondrion;GO:0008137//NADH dehydrogenase (ubiquinone) activity;GO:0005886//plasma membrane
Unigene23846_All	1150	ko00190//Oxidative phosphorylation;ko01100//Metabolic pathways	Metabolism	Global and overview maps;Energy metabolism	-3.5924	5.45119e-22	1.29525e-22	K03953//NADH dehydrogenase (ubiquinone) 1 alpha subcomplex subunit 9+ko01100//Metabolic pathways+ko00190//Oxidative phosphorylation;K03953//NADH dehydrogenase (ubiquinone) 1 alpha subcomplex subunit 9+ko01100//Metabolic pathways+ko00190//Oxidative phosphorylation;K03953//NADH dehydrogenase (ubiquinone) 1 alpha subcomplex subunit 9+ko01100//Metabolic pathways+ko00190//Oxidative phosphorylation	NAD(P)H-binding		predicted protein [Hordeum vulgare subsp. vulgare] >BAJ96242.1 predicted protein [Hordeum vulgare subsp. vulgare] >BAJ88789.1 predicted protein [Hordeum vulgare subsp. vulgare]	[T] KOG4039 Serine/threonine kinase TIP30/CC3	Cyclin-B1-2 OS=Oryza sativa subsp. japonica GN=CYCB1-2 PE=3 SV=1	GO:0008137//NADH dehydrogenase (ubiquinone) activity;GO:0050662//coenzyme binding
Unigene58884_All	910	ko01100//Metabolic pathways;ko00190//Oxidative phosphorylation	Metabolism	Global and overview maps;Energy metabolism	-3.61937	5.38523e-06	3.01957e-06	K00413//ubiquinol-cytochrome c reductase cytochrome c1 subunit+ko01100//Metabolic pathways+ko00190//Oxidative phosphorylation;K00413//ubiquinol-cytochrome c reductase cytochrome c1 subunit+ko01100//Metabolic pathways+ko00190//Oxidative phosphorylation;K00413//ubiquinol-cytochrome c reductase cytochrome c1 subunit+ko01100//Metabolic pathways+ko00190//Oxidative phosphorylation;K00413//ubiquinol-cyt…	Cytochrome C1 family		Cytochrome c1-1, heme protein, mitochondrial [Auxenochlorella protothecoides] >KFM25848.1 Cytochrome c1-1, heme protein, mitochondrial [Auxenochlorella protothecoides]	[C] KOG3052 Cytochrome c1	Cytochrome c1-2, heme protein, mitochondrial (Fragment) OS=Solanum tuberosum GN=CYCL PE=1 SV=1	GO:0009055//electron transfer activity;GO:0046872//metal ion binding;GO:0020037//heme binding
Unigene33018_All	1087	ko00190//Oxidative phosphorylation;ko01100//Metabolic pathways	Metabolism	Energy metabolism;Global and overview maps	-3.77587	5.92845e-23	1.3687e-23	K11352//NADH dehydrogenase (ubiquinone) 1 alpha subcomplex subunit 12+ko01100//Metabolic pathways+ko00190//Oxidative phosphorylation;K11352//NADH dehydrogenase (ubiquinone) 1 alpha subcomplex subunit 12+ko01100//Metabolic pathways+ko00190//Oxidative phosphorylation;K11352//NADH dehydrogenase (ubiquinone) 1 alpha subcomplex subunit 12+ko01100//Metabolic pathways+ko00190//Oxidative phosphorylation	NADH ubiquinone oxidoreductase subunit NDUFA12		hypothetical protein COCSUDRAFT_53665 [Coccomyxa subellipsoidea C-169] >EIE22801.1 hypothetical protein COCSUDRAFT_53665 [Coccomyxa subellipsoidea C-169]	[C] KOG3382 NADH:ubiquinone oxidoreductase, B17.2 subunit	Probable NADH dehydrogenase [ubiquinone] 1 alpha subcomplex subunit 12 OS=Arabidopsis thaliana GN=At3g03100 PE=1 SV=1	GO:0009055//electron transfer activity;GO:0050897//cobalt ion binding;GO:0006979//response to oxidative stress;GO:0005747//mitochondrial respiratory chain complex I;GO:0005743//mitochondrial inner membrane;GO:0009735//response to cytokinin;GO:0070469//respiratory chain;GO:0008137//NADH dehydrogenase (ubiquinone) activity
CL895.Contig1_All	695	ko01200//Carbon metabolism;ko00190//Oxidative phosphorylation;ko01100//Metabolic pathways;ko01110//Biosynthesis of secondary metabolites;ko00020//Citrate cycle (TCA cycle)	Metabolism	Energy metabolism;Global and overview maps;Carbohydrate metabolism	-3.79953	0.000371169	0.000265399	K00235//succinate dehydrogenase (ubiquinone) iron-sulfur subunit [EC:1.3.5.1]+ko00020//Citrate cycle (TCA cycle)+ko01100//Metabolic pathways+ko00190//Oxidative phosphorylation+ko01110//Biosynthesis of secondary metabolites+ko01200//Carbon metabolism;K00235//succinate dehydrogenase (ubiquinone) iron-sulfur subunit [EC:1.3.5.1]+ko00020//Citrate cycle (TCA cycle)+ko01100//Metabolic pathways+ko00190/…	2Fe-2S iron-sulfur cluster binding domain	XM_009520990.1 Phytophthora sojae hypothetical protein mRNA	SDH2, succinate dehydrogenase subunit 2 [Ectocarpus siliculosus]	[C] KOG3049 Succinate dehydrogenase, Fe-S protein subunit	Succinate dehydrogenase [ubiquinone] iron-sulfur subunit 1, mitochondrial OS=Arabidopsis thaliana GN=SDH2-1 PE=1 SV=2	GO:0009055//electron transfer activity;GO:0051537//2 iron, 2 sulfur cluster binding;GO:0006099//tricarboxylic acid cycle;GO:0046872//metal ion binding;GO:0005743//mitochondrial inner membrane;GO:0051539//4 iron, 4 sulfur cluster binding;GO:0008177//succinate dehydrogenase (ubiquinone) activity;GO:0051538//3 iron, 4 sulfur cluster binding
Unigene1117_All	2981	ko01100//Metabolic pathways;ko00190//Oxidative phosphorylation	Metabolism	Energy metabolism;Global and overview maps	-3.80131	2.67844e-87	2.40475e-88	K00412//ubiquinol-cytochrome c reductase cytochrome b subunit+ko01100//Metabolic pathways+ko00190//Oxidative phosphorylation;K00412//ubiquinol-cytochrome c reductase cytochrome b subunit+ko01100//Metabolic pathways+ko00190//Oxidative phosphorylation;K00412//ubiquinol-cytochrome c reductase cytochrome b subunit+ko01100//Metabolic pathways+ko00190//Oxidative phosphorylation;K00412//ubiquinol-cytoch…	Cytochrome b/b6/petB	XM_009034202.1 Aureococcus anophagefferens hypothetical protein mRNA	apocytochrome b (mitochondrion) [Pyropia yezoensis] >AFH57671.1 apocytochrome b (mitochondrion) [Pyropia yezoensis] >AGZ17867.1 apocytochrome b (mitochondrion) [Pyropia yezoensis]	[C] KOG4663 Cytochrome b	Cytochrome b OS=Phytophthora megasperma GN=cob PE=3 SV=1	GO:0046872//metal ion binding;GO:0008121//ubiquinol-cytochrome-c reductase activity;GO:0045275//respiratory chain complex III;GO:0005743//mitochondrial inner membrane;GO:0006122//mitochondrial electron transport, ubiquinol to cytochrome c
CL106.Contig35_All	1396	ko01100//Metabolic pathways;ko00190//Oxidative phosphorylation;ko00195//Photosynthesis	Metabolism	Energy metabolism;Global and overview maps	-3.80759	7.76466e-64	8.76404e-65	K02108//F-type H+-transporting ATPase subunit a+ko01100//Metabolic pathways+ko00190//Oxidative phosphorylation+ko00195//Photosynthesis;K01358//ATP-dependent Clp protease, protease subunit [EC:3.4.21.92]		AK110485.1 Oryza sativa Japonica Group cDNA clone:002-167-B02, full insert sequence	hypothetical protein BVRB_042430, partial [Beta vulgaris subsp. vulgaris]		Uncharacterized protein ORF91 OS=Phalaenopsis aphrodite subsp. formosana PE=4 SV=1
CL5614.Contig2_All	955	ko00190//Oxidative phosphorylation;ko01100//Metabolic pathways	Metabolism	Energy metabolism;Global and overview maps	-3.8366	0.000388225	0.000278782	K02261//cytochrome c oxidase subunit 2+ko01100//Metabolic pathways+ko00190//Oxidative phosphorylation;K02261//cytochrome c oxidase subunit 2+ko01100//Metabolic pathways+ko00190//Oxidative phosphorylation;K02261//cytochrome c oxidase subunit 2+ko01100//Metabolic pathways+ko00190//Oxidative phosphorylation;K02261//cytochrome c oxidase subunit 2+ko01100//Metabolic pathways+ko00190//Oxidative phospho…	Cytochrome C oxidase subunit II, periplasmic domain		cytochrome c oxidase subunit 2 (mitochondrion) [Oltmannsiellopsis viridis] >ABC96367.1 cytochrome c oxidase subunit 2 (mitochondrion) [Oltmannsiellopsis viridis]	[C] KOG4767 Cytochrome c oxidase, subunit II, and related proteins	Cytochrome c oxidase subunit 2 OS=Oenothera berteroana GN=COX2 PE=3 SV=3	GO:0022900//electron transport chain;GO:0004129//cytochrome-c oxidase activity;GO:0005507//copper ion binding;GO:0005743//mitochondrial inner membrane;GO:0016021//integral component of membrane;GO:0070469//respiratory chain
Unigene71155_All	550	ko01100//Metabolic pathways;ko00190//Oxidative phosphorylation	Metabolism	Global and overview maps;Energy metabolism	-3.84176	0.000376731	0.000270104	K03937//NADH dehydrogenase (ubiquinone) Fe-S protein 4+ko01100//Metabolic pathways+ko00190//Oxidative phosphorylation;K03937//NADH dehydrogenase (ubiquinone) Fe-S protein 4+ko01100//Metabolic pathways+ko00190//Oxidative phosphorylation;K03937//NADH dehydrogenase (ubiquinone) Fe-S protein 4+ko01100//Metabolic pathways+ko00190//Oxidative phosphorylation;K03937//NADH dehydrogenase (ubiquinone) Fe-S …	ETC complex I subunit conserved region		PREDICTED: NADH dehydrogenase [ubiquinone] iron-sulfur protein 4, mitochondrial [Daucus carota subsp. sativus]	[C] KOG3389 NADH:ubiquinone oxidoreductase, NDUFS4/18 kDa subunit	NADH dehydrogenase [ubiquinone] iron-sulfur protein 4, mitochondrial OS=Arabidopsis thaliana GN=FRO1 PE=1 SV=1	GO:0022900//electron transport chain;GO:0016651//oxidoreductase activity, acting on NAD(P)H;GO:0005747//mitochondrial respiratory chain complex I;GO:0006970//response to osmotic stress;GO:0008137//NADH dehydrogenase (ubiquinone) activity;GO:0009631//cold acclimation;GO:0050897//cobalt ion binding
CL8953.Contig2_All	4041	ko01100//Metabolic pathways;ko00190//Oxidative phosphorylation	Metabolism	Global and overview maps;Energy metabolism	-3.88129	5.39654e-162	3.07921e-163	K02262//cytochrome c oxidase subunit 3+ko01100//Metabolic pathways+ko00190//Oxidative phosphorylation;K02262//cytochrome c oxidase subunit 3+ko01100//Metabolic pathways+ko00190//Oxidative phosphorylation;K02262//cytochrome c oxidase subunit 3+ko01100//Metabolic pathways+ko00190//Oxidative phosphorylation;K02262//cytochrome c oxidase subunit 3+ko01100//Metabolic pathways+ko00190//Oxidative phospho…	Cytochrome c oxidase subunit III		cytochrome c oxidase subunit 3 (mitochondrion) [Prasinoderma coloniale] >AGW52208.1 cytochrome c oxidase subunit 3 (mitochondrion) [Prasinoderma coloniale]	[C] KOG4664 Cytochrome oxidase subunit III and related proteins	Cytochrome c oxidase subunit 3 OS=Prototheca wickerhamii GN=COX3 PE=3 SV=1	GO:0019646//aerobic electron transport chain;GO:0004129//cytochrome-c oxidase activity;GO:0016021//integral component of membrane;GO:0005739//mitochondrion
CL491.Contig1_All	1094	ko01100//Metabolic pathways;ko00190//Oxidative phosphorylation	Metabolism	Global and overview maps;Energy metabolism	-3.89239	2.83568e-07	1.40185e-07	K02133//F-type H+-transporting ATPase subunit beta [EC:7.1.2.2]+ko01100//Metabolic pathways+ko00190//Oxidative phosphorylation;K02133//F-type H+-transporting ATPase subunit beta [EC:7.1.2.2]+ko01100//Metabolic pathways+ko00190//Oxidative phosphorylation;K02133//F-type H+-transporting ATPase subunit beta [EC:7.1.2.2]+ko01100//Metabolic pathways+ko00190//Oxidative phosphorylation;K02133//F-type H+-…	ATP synthase alpha/beta family, nucleotide-binding domain	XM_009040827.1 Aureococcus anophagefferens hypothetical protein partial mRNA	hypothetical protein GUITHDRAFT_64866 [Guillardia theta CCMP2712] >EKX52790.1 hypothetical protein GUITHDRAFT_64866 [Guillardia theta CCMP2712]	[C] KOG1350 F0F1-type ATP synthase, beta subunit	ATP synthase subunit beta, mitochondrial OS=Chlamydomonas reinhardtii GN=ATP2 PE=1 SV=1	GO:0015986//ATP synthesis coupled proton transport;GO:0045261//proton-transporting ATP synthase complex, catalytic core F(1);GO:0005524//ATP binding;GO:0046933//proton-transporting ATP synthase activity, rotational mechanism
Unigene40118_All	2450	ko01100//Metabolic pathways;ko00190//Oxidative phosphorylation	Metabolism	Global and overview maps;Energy metabolism	-3.90477	1.60501e-25	3.45305e-26	K02261//cytochrome c oxidase subunit 2+ko01100//Metabolic pathways+ko00190//Oxidative phosphorylation;K02261//cytochrome c oxidase subunit 2+ko01100//Metabolic pathways+ko00190//Oxidative phosphorylation;K02261//cytochrome c oxidase subunit 2+ko01100//Metabolic pathways+ko00190//Oxidative phosphorylation;K02261//cytochrome c oxidase subunit 2+ko01100//Metabolic pathways+ko00190//Oxidative phospho…	UbiA prenyltransferase family		cytochrome c oxidase subunit 2 (mitochondrion) [Trebouxia aggregata]	[C] KOG4767 Cytochrome c oxidase, subunit II, and related proteins	Cytochrome c oxidase subunit 2 OS=Oenothera berteroana GN=COX2 PE=3 SV=3	GO:0022900//electron transport chain;GO:0004129//cytochrome-c oxidase activity;GO:0005507//copper ion binding;GO:0005743//mitochondrial inner membrane;GO:0016021//integral component of membrane;GO:0070469//respiratory chain
Unigene42718_All	1874	ko01100//Metabolic pathways;ko00190//Oxidative phosphorylation	Metabolism	Global and overview maps;Energy metabolism	-4.0344	3.32307e-79	3.19404e-80	K02133//F-type H+-transporting ATPase subunit beta [EC:7.1.2.2]+ko01100//Metabolic pathways+ko00190//Oxidative phosphorylation;K02133//F-type H+-transporting ATPase subunit beta [EC:7.1.2.2]+ko01100//Metabolic pathways+ko00190//Oxidative phosphorylation;K02133//F-type H+-transporting ATPase subunit beta [EC:7.1.2.2]+ko01100//Metabolic pathways+ko00190//Oxidative phosphorylation;K02133//F-type H+-…	ATP synthase alpha/beta family, nucleotide-binding domain	KM009626.1 Lithodesmium undulatum isolate CCMP1797 ATP synthase beta subunit (atpB) gene, partial cds; chloroplast	predicted protein [Physcomitrella patens] >EDQ62468.1 predicted protein [Physcomitrella patens]	[C] KOG1350 F0F1-type ATP synthase, beta subunit	ATP synthase subunit beta, mitochondrial OS=Chlamydomonas reinhardtii GN=ATP2 PE=1 SV=1	GO:0015986//ATP synthesis coupled proton transport;GO:0045261//proton-transporting ATP synthase complex, catalytic core F(1);GO:0005524//ATP binding;GO:0046933//proton-transporting ATP synthase activity, rotational mechanism
Unigene68075_All	425	ko00190//Oxidative phosphorylation;ko01100//Metabolic pathways	Metabolism	Energy metabolism;Global and overview maps	-4.0344	0.000115548	7.6567e-05	K11352//NADH dehydrogenase (ubiquinone) 1 alpha subcomplex subunit 12+ko01100//Metabolic pathways+ko00190//Oxidative phosphorylation;K11352//NADH dehydrogenase (ubiquinone) 1 alpha subcomplex subunit 12+ko01100//Metabolic pathways+ko00190//Oxidative phosphorylation;K11352//NADH dehydrogenase (ubiquinone) 1 alpha subcomplex subunit 12+ko01100//Metabolic pathways+ko00190//Oxidative phosphorylation;…	NADH ubiquinone oxidoreductase subunit NDUFA12		NADH:ubiquinone oxidoreductase [Chondrus crispus] >CDF39984.1 NADH:ubiquinone oxidoreductase [Chondrus crispus]	[C] KOG3382 NADH:ubiquinone oxidoreductase, B17.2 subunit	Probable NADH dehydrogenase [ubiquinone] 1 alpha subcomplex subunit 12 OS=Arabidopsis thaliana GN=At3g03100 PE=1 SV=1	GO:0009055//electron transfer activity;GO:0050897//cobalt ion binding;GO:0006979//response to oxidative stress;GO:0005747//mitochondrial respiratory chain complex I;GO:0005743//mitochondrial inner membrane;GO:0009735//response to cytokinin;GO:0070469//respiratory chain;GO:0008137//NADH dehydrogenase (ubiquinone) activity
Unigene18772_All	2466	ko00190//Oxidative phosphorylation;ko00195//Photosynthesis;ko01100//Metabolic pathways	Metabolism	Energy metabolism;Global and overview maps	-4.03914	6.74628e-66	7.45719e-67	K02132//F-type H+-transporting ATPase subunit alpha+ko01100//Metabolic pathways+ko00190//Oxidative phosphorylation;K02132//F-type H+-transporting ATPase subunit alpha+ko01100//Metabolic pathways+ko00190//Oxidative phosphorylation;K02132//F-type H+-transporting ATPase subunit alpha+ko01100//Metabolic pathways+ko00190//Oxidative phosphorylation;K02111//F-type H+/Na+-transporting ATPase subunit alph…	ATP synthase delta (OSCP) subunit	KF285533.1 Ostreococcus tauri isolate RCC1561 chloroplast, complete genome	hypothetical protein SOVF_209290, partial [Spinacia oleracea]	[C] KOG1353 F0F1-type ATP synthase, alpha subunit	ATP synthase subunit alpha, chloroplastic OS=Euglena gracilis GN=atpA PE=3 SV=1	GO:0015986//ATP synthesis coupled proton transport;GO:0045261//proton-transporting ATP synthase complex, catalytic core F(1);GO:0005524//ATP binding;GO:0046933//proton-transporting ATP synthase activity, rotational mechanism
CL106.Contig24_All	1256	ko00195//Photosynthesis;ko00190//Oxidative phosphorylation;ko01100//Metabolic pathways	Metabolism	Energy metabolism;Global and overview maps	-4.04366	2.00975e-32	3.69689e-33	K02108//F-type H+-transporting ATPase subunit a+ko01100//Metabolic pathways+ko00190//Oxidative phosphorylation+ko00195//Photosynthesis		LC269924.1 Heterosigma akashiwo chloroplast DNA, complete genome, isolate: CCMP1596	hypothetical protein BVRB_020780, partial [Beta vulgaris subsp. vulgaris]		Uncharacterized protein ORF91 OS=Phalaenopsis aphrodite subsp. formosana PE=4 SV=1
CL1745.Contig1_All	673	ko01100//Metabolic pathways;ko00190//Oxidative phosphorylation	Metabolism	Global and overview maps;Energy metabolism	-4.12187	6.4051e-05	4.08984e-05	K03880//NADH-ubiquinone oxidoreductase chain 3 [EC:7.1.1.2]+ko01100//Metabolic pathways+ko00190//Oxidative phosphorylation;K03880//NADH-ubiquinone oxidoreductase chain 3 [EC:7.1.1.2]+ko01100//Metabolic pathways+ko00190//Oxidative phosphorylation;K03880//NADH-ubiquinone oxidoreductase chain 3 [EC:7.1.1.2]+ko01100//Metabolic pathways+ko00190//Oxidative phosphorylation;K03880//NADH-ubiquinone oxidor…	NADH-ubiquinone/plastoquinone oxidoreductase, chain 3	XM_014042681.1 Monoraphidium neglectum NADH dehydrogenase (ubiquinone) Fe-Sprotein 7 mRNA	NADH dehydrogenase subunit 3 (mitochondrion) [Monomastix sp. OKE-1] >AGZ90197.1 NADH dehydrogenase subunit 3 (mitochondrion) [Monomastix sp. OKE-1]	[C] KOG1687 NADH-ubiquinone oxidoreductase, NUFS7/PSST/20 kDa subunit	NADH-ubiquinone oxidoreductase chain 3 OS=Chondrus crispus GN=ND3 PE=3 SV=1	GO:0016021//integral component of membrane;GO:0005739//mitochondrion;GO:0008137//NADH dehydrogenase (ubiquinone) activity
Unigene27588_All	10810	ko00190//Oxidative phosphorylation;ko01100//Metabolic pathways	Metabolism	Energy metabolism;Global and overview maps	-4.13722	7.13798e-164	4.02978e-165	K03934//NADH dehydrogenase (ubiquinone) Fe-S protein 1 [EC:7.1.1.2 1.6.99.3]+ko01100//Metabolic pathways+ko00190//Oxidative phosphorylation;K03934//NADH dehydrogenase (ubiquinone) Fe-S protein 1 [EC:7.1.1.2 1.6.99.3]+ko01100//Metabolic pathways+ko00190//Oxidative phosphorylation;K03934//NADH dehydrogenase (ubiquinone) Fe-S protein 1 [EC:7.1.1.2 1.6.99.3]+ko01100//Metabolic pathways+ko00190//Oxida…	NADH dehydrogenase	XM_012347005.1 Saprolegnia parasitica CBS 223.65 NADH dehydrogenase iron-sulfur protein 8 mRNA	NADH dehydrogenase (ubiquinone) Fe-S protein 1 [Nannochloropsis gaditana CCMP526] >EKU23397.1 NADH dehydrogenase (ubiquinone) Fe-S protein 1 [Nannochloropsis gaditana CCMP526]	[C] KOG2282 NADH-ubiquinone oxidoreductase, NDUFS1/75 kDa subunit	NADH-ubiquinone oxidoreductase chain 4 OS=Triticum aestivum GN=ND4 PE=2 SV=2	GO:0009055//electron transfer activity;GO:0016020//membrane;GO:0042773//ATP synthesis coupled electron transport;GO:0051536//iron-sulfur cluster binding;GO:0006979//response to oxidative stress;GO:0005747//mitochondrial respiratory chain complex I;GO:0045333//cellular respiration;GO:0008137//NADH dehydrogenase (ubiquinone) activity;GO:0009507//chloroplast
Unigene61872_All	1224	ko00190//Oxidative phosphorylation;ko01100//Metabolic pathways	Metabolism	Global and overview maps;Energy metabolism	-4.18415	1.31337e-16	3.79557e-17	K03953//NADH dehydrogenase (ubiquinone) 1 alpha subcomplex subunit 9+ko01100//Metabolic pathways+ko00190//Oxidative phosphorylation;K03953//NADH dehydrogenase (ubiquinone) 1 alpha subcomplex subunit 9+ko01100//Metabolic pathways+ko00190//Oxidative phosphorylation;K03953//NADH dehydrogenase (ubiquinone) 1 alpha subcomplex subunit 9+ko01100//Metabolic pathways+ko00190//Oxidative phosphorylation;K03…	NAD(P)H-binding		NADH dehydrogenase [Galdieria sulphuraria] >EME30459.1 NADH dehydrogenase [Galdieria sulphuraria]	[C] KOG2865 NADH:ubiquinone oxidoreductase, NDUFA9/39kDa subunit	NADH dehydrogenase [ubiquinone] 1 alpha subcomplex subunit 9, mitochondrial OS=Arabidopsis thaliana GN=At2g20360 PE=1 SV=2	GO:0008137//NADH dehydrogenase (ubiquinone) activity;GO:0050662//coenzyme binding
Unigene32727_All	504	ko01100//Metabolic pathways;ko00190//Oxidative phosphorylation	Metabolism	Energy metabolism;Global and overview maps	-4.20433	3.54307e-05	2.18945e-05	K02137//F-type H+-transporting ATPase subunit O+ko01100//Metabolic pathways+ko00190//Oxidative phosphorylation;K02137//F-type H+-transporting ATPase subunit O+ko01100//Metabolic pathways+ko00190//Oxidative phosphorylation;K02137//F-type H+-transporting ATPase subunit O+ko01100//Metabolic pathways+ko00190//Oxidative phosphorylation;K02137//F-type H+-transporting ATPase subunit O+ko01100//Metabolic…	ATP synthase delta (OSCP) subunit		PREDICTED: uncharacterized protein LOC101256168 [Solanum lycopersicum]	[C] KOG1662 Mitochondrial F1F0-ATP synthase, subunit OSCP/ATP5	ATP synthase subunit O, mitochondrial OS=Ipomoea batatas PE=1 SV=1	GO:0015986//ATP synthesis coupled proton transport;GO:0046933//proton-transporting ATP synthase activity, rotational mechanism
CL5577.Contig1_All	3463	ko00190//Oxidative phosphorylation;ko01100//Metabolic pathways	Metabolism	Energy metabolism;Global and overview maps	-4.29493	1.1035e-51	1.44705e-52	K03935//NADH dehydrogenase (ubiquinone) Fe-S protein 2 [EC:7.1.1.2 1.6.99.3]+ko01100//Metabolic pathways+ko00190//Oxidative phosphorylation;K03935//NADH dehydrogenase (ubiquinone) Fe-S protein 2 [EC:7.1.1.2 1.6.99.3]+ko01100//Metabolic pathways+ko00190//Oxidative phosphorylation;K03935//NADH dehydrogenase (ubiquinone) Fe-S protein 2 [EC:7.1.1.2 1.6.99.3]+ko01100//Metabolic pathways+ko00190//Oxida…	Respiratory-chain NADH dehydrogenase, 49 Kd subunit		NADH dehydrogenase subunit 7 (mitochondrion) [Trebouxiophyceae sp. MX-AZ01] >AFQ93763.1 NADH dehydrogenase subunit 7 (mitochondrion) [Trebouxiophyceae sp. MX-AZ01]	[C] KOG2870 NADH:ubiquinone oxidoreductase, NDUFS2/49 kDa subunit	NADH-ubiquinone oxidoreductase 49 kDa subunit OS=Prototheca wickerhamii GN=NAD7 PE=3 SV=1	GO:0016651//oxidoreductase activity, acting on NAD(P)H;GO:0048038//quinone binding;GO:0051287//NAD binding;GO:0005739//mitochondrion
Unigene61319_All	437	ko00190//Oxidative phosphorylation;ko01100//Metabolic pathways	Metabolism	Energy metabolism;Global and overview maps	-4.35633	1.08638e-05	6.31718e-06	K02134//F-type H+-transporting ATPase subunit delta+ko01100//Metabolic pathways+ko00190//Oxidative phosphorylation;K02134//F-type H+-transporting ATPase subunit delta+ko01100//Metabolic pathways+ko00190//Oxidative phosphorylation;K02134//F-type H+-transporting ATPase subunit delta+ko01100//Metabolic pathways+ko00190//Oxidative phosphorylation;K02134//F-type H+-transporting ATPase subunit delta+ko…	ATP synthase, Delta/Epsilon chain, beta-sandwich domain		hypothetical protein M569_05335 [Genlisea aurea]	[C] KOG1758 Mitochondrial F1F0-ATP synthase, subunit delta/ATP16	ATP synthase subunit delta', mitochondrial OS=Arabidopsis thaliana GN=At5g47030 PE=1 SV=1	GO:0015986//ATP synthesis coupled proton transport;GO:0045261//proton-transporting ATP synthase complex, catalytic core F(1);GO:0046933//proton-transporting ATP synthase activity, rotational mechanism
Unigene70118_All	608	ko01100//Metabolic pathways;ko00190//Oxidative phosphorylation	Metabolism	Global and overview maps;Energy metabolism	-4.35633	1.08638e-05	6.31718e-06	K03937//NADH dehydrogenase (ubiquinone) Fe-S protein 4+ko01100//Metabolic pathways+ko00190//Oxidative phosphorylation;K03937//NADH dehydrogenase (ubiquinone) Fe-S protein 4+ko01100//Metabolic pathways+ko00190//Oxidative phosphorylation;K03937//NADH dehydrogenase (ubiquinone) Fe-S protein 4+ko01100//Metabolic pathways+ko00190//Oxidative phosphorylation	ETC complex I subunit conserved region		PREDICTED: NADH dehydrogenase [ubiquinone] iron-sulfur protein 4, mitochondrial-like [Fragaria vesca subsp. vesca]	[C] KOG3389 NADH:ubiquinone oxidoreductase, NDUFS4/18 kDa subunit	NADH dehydrogenase [ubiquinone] iron-sulfur protein 4, mitochondrial OS=Arabidopsis thaliana GN=FRO1 PE=1 SV=1	GO:0022900//electron transport chain;GO:0016651//oxidoreductase activity, acting on NAD(P)H
Unigene68117_All	2105	ko01110//Biosynthesis of secondary metabolites;ko00190//Oxidative phosphorylation;ko01100//Metabolic pathways;ko00860//Porphyrin and chlorophyll metabolism	Metabolism	Global and overview maps;Metabolism of cofactors and vitamins;Energy metabolism	-4.41292	2.3511e-24	5.21756e-25	K02259//cytochrome c oxidase assembly protein subunit 15+ko00860//Porphyrin and chlorophyll metabolism+ko01100//Metabolic pathways+ko00190//Oxidative phosphorylation+ko01110//Biosynthesis of secondary metabolites;K02259//cytochrome c oxidase assembly protein subunit 15+ko00860//Porphyrin and chlorophyll metabolism+ko01100//Metabolic pathways+ko00190//Oxidative phosphorylation+ko01110//Biosynthesi…	Cytochrome oxidase assembly protein		cytochrome c oxidase assembly protein COX15-like isoform X1 [Asparagus officinalis]	[O] KOG2725 Cytochrome oxidase assembly factor COX15	Cytochrome c oxidase assembly protein COX15 OS=Arabidopsis thaliana GN=COX15 PE=2 SV=1
Unigene2480_All	6372	ko00190//Oxidative phosphorylation;ko01100//Metabolic pathways	Metabolism	Global and overview maps;Energy metabolism	-4.43709	6.70253e-157	3.92549e-158	K05577//NAD(P)H-quinone oxidoreductase subunit 5 [EC:7.1.1.2]+ko01100//Metabolic pathways+ko00190//Oxidative phosphorylation;K05577//NAD(P)H-quinone oxidoreductase subunit 5 [EC:7.1.1.2]+ko01100//Metabolic pathways+ko00190//Oxidative phosphorylation;K05577//NAD(P)H-quinone oxidoreductase subunit 5 [EC:7.1.1.2]+ko01100//Metabolic pathways+ko00190//Oxidative phosphorylation;K05577//NAD(P)H-quinone …	Proton-conducting membrane transporter		NADH dehydrogenase subunit L (chromatophore) [Paulinella chromatophora] >B1X491.1 RecName: Full=NAD(P)H-quinone oxidoreductase subunit 5, organellar chromatophore 1; AltName: Full=NAD(P)H dehydrogenase subunit 5 1; AltName: Full=NADH-plastoquinone oxidoreductase subunit 5 1 >ACB42760.1 NADH dehydrogenase subunit L (chromatophore) [Paulinella chromatophora]	[C] KOG4668 NADH dehydrogenase subunits 2, 5, and related proteins	NAD(P)H-quinone oxidoreductase subunit 5, chloroplastic OS=Mesostigma viride GN=ndhF PE=3 SV=1	GO:0006810//transport;GO:0009535//chloroplast thylakoid membrane;GO:0070118//organellar chromatophore thylakoid membrane;GO:0016021//integral component of membrane;GO:0042773//ATP synthesis coupled electron transport;GO:0048038//quinone binding;GO:0009536//plastid;GO:0008137//NADH dehydrogenase (ubiquinone) activity
CL4747.Contig1_All	1756	ko01100//Metabolic pathways;ko00190//Oxidative phosphorylation	Metabolism	Global and overview maps;Energy metabolism	-4.48186	5.75365e-55	7.25216e-56	K02256//cytochrome c oxidase subunit 1 [EC:1.9.3.1]+ko01100//Metabolic pathways+ko00190//Oxidative phosphorylation;K02256//cytochrome c oxidase subunit 1 [EC:1.9.3.1]+ko01100//Metabolic pathways+ko00190//Oxidative phosphorylation;K02256//cytochrome c oxidase subunit 1 [EC:1.9.3.1]+ko01100//Metabolic pathways+ko00190//Oxidative phosphorylation;K02256//cytochrome c oxidase subunit 1 [EC:1.9.3.1]+ko…	Cytochrome C and Quinol oxidase polypeptide I		Cytochrome oxidase subunit I (mitochondrion) [Tetraselmis subcordiformis]	[C] KOG4769 Cytochrome c oxidase, subunit I	Cytochrome c oxidase subunit 1 OS=Marchantia polymorpha GN=COX1 PE=3 SV=2	GO:0020037//heme binding;GO:0005506//iron ion binding;GO:0004129//cytochrome-c oxidase activity;GO:0045277//respiratory chain complex IV;GO:0009060//aerobic respiration;GO:0006119//oxidative phosphorylation;GO:0022900//electron transport chain;GO:0005507//copper ion binding;GO:0016021//integral component of membrane;GO:0005743//mitochondrial inner membrane;GO:0005886//plasma membrane
Unigene48011_All	287	ko00195//Photosynthesis;ko00190//Oxidative phosphorylation;ko01100//Metabolic pathways	Metabolism	Global and overview maps;Energy metabolism	-4.49384	0.000965735	0.000743173	K02115//F-type H+-transporting ATPase subunit gamma+ko01100//Metabolic pathways+ko00190//Oxidative phosphorylation+ko00195//Photosynthesis;K02115//F-type H+-transporting ATPase subunit gamma+ko01100//Metabolic pathways+ko00190//Oxidative phosphorylation+ko00195//Photosynthesis
Unigene68611_All	474	ko00190//Oxidative phosphorylation;ko01100//Metabolic pathways	Metabolism	Global and overview maps;Energy metabolism	-4.49384	0.000965735	0.000743173	K02126//F-type H+-transporting ATPase subunit a+ko01100//Metabolic pathways+ko00190//Oxidative phosphorylation;K02126//F-type H+-transporting ATPase subunit a+ko01100//Metabolic pathways+ko00190//Oxidative phosphorylation;K02126//F-type H+-transporting ATPase subunit a+ko01100//Metabolic pathways+ko00190//Oxidative phosphorylation;K02126//F-type H+-transporting ATPase subunit a+ko01100//Metabolic…	ATP synthase A chain		ATP synthase F0 subunit 6 (mitochondrion) [Gelidium sclerophyllum] >AOX49003.1 ATP synthase F0 subunit 6 (mitochondrion) [Gelidium sclerophyllum]	[C] KOG4665 ATP synthase F0 subunit 6 and related proteins	ATP synthase subunit a OS=Chondrus crispus GN=ATP6 PE=3 SV=1	GO:0015986//ATP synthesis coupled proton transport;GO:0045263//proton-transporting ATP synthase complex, coupling factor F(o);GO:0005743//mitochondrial inner membrane;GO:0016021//integral component of membrane;GO:0015078//hydrogen ion transmembrane transporter activity
Unigene68820_All	400	ko00020//Citrate cycle (TCA cycle);ko01200//Carbon metabolism;ko01110//Biosynthesis of secondary metabolites;ko00190//Oxidative phosphorylation;ko01100//Metabolic pathways	Metabolism	Energy metabolism;Carbohydrate metabolism;Global and overview maps	-4.49384	0.000965735	0.000743173	K00236//succinate dehydrogenase (ubiquinone) cytochrome b560 subunit+ko00020//Citrate cycle (TCA cycle)+ko01100//Metabolic pathways+ko00190//Oxidative phosphorylation+ko01110//Biosynthesis of secondary metabolites+ko01200//Carbon metabolism	Succinate dehydrogenase/Fumarate reductase transmembrane subunit		succinate dehydrogenase cytochrome b560 mitochondrial [Chrysochromulina sp. CCMP291]	[G] KOG0449 Succinate dehydrogenase, cytochrome b subunit	Succinate dehydrogenase cytochrome b560 subunit OS=Marchantia polymorpha GN=SDH3 PE=3 SV=1	GO:0006099//tricarboxylic acid cycle;GO:0009055//electron transfer activity;GO:0000104//succinate dehydrogenase activity;GO:0046872//metal ion binding;GO:0045281//succinate dehydrogenase complex;GO:0016021//integral component of membrane;GO:0005739//mitochondrion
CL6013.Contig1_All	1158	ko00190//Oxidative phosphorylation;ko01100//Metabolic pathways	Metabolism	Energy metabolism;Global and overview maps	-4.55797	1.24914e-11	4.54807e-12	K02133//F-type H+-transporting ATPase subunit beta [EC:7.1.2.2]+ko01100//Metabolic pathways+ko00190//Oxidative phosphorylation;K02133//F-type H+-transporting ATPase subunit beta [EC:7.1.2.2]+ko01100//Metabolic pathways+ko00190//Oxidative phosphorylation;K02133//F-type H+-transporting ATPase subunit beta [EC:7.1.2.2]+ko01100//Metabolic pathways+ko00190//Oxidative phosphorylation;K02133//F-type H+-…	ATP synthase alpha/beta family, nucleotide-binding domain	GU591327.1 Durinskia baltica strain CS-38 chloroplast, complete genome	hypothetical protein COCSUDRAFT_48882 [Coccomyxa subellipsoidea C-169] >EIE19260.1 hypothetical protein COCSUDRAFT_48882 [Coccomyxa subellipsoidea C-169]	[C] KOG1350 F0F1-type ATP synthase, beta subunit	ATP synthase subunit beta, mitochondrial OS=Chlamydomonas reinhardtii GN=ATP2 PE=1 SV=1	GO:0015986//ATP synthesis coupled proton transport;GO:0045261//proton-transporting ATP synthase complex, catalytic core F(1);GO:0005524//ATP binding;GO:0046933//proton-transporting ATP synthase activity, rotational mechanism
CL6885.Contig2_All	874	ko01110//Biosynthesis of secondary metabolites;ko00020//Citrate cycle (TCA cycle);ko01200//Carbon metabolism;ko00190//Oxidative phosphorylation;ko01100//Metabolic pathways	Metabolism	Carbohydrate metabolism;Global and overview maps;Energy metabolism	-4.61937	1.03639e-06	5.40285e-07	K00234//succinate dehydrogenase (ubiquinone) flavoprotein subunit [EC:1.3.5.1]+ko00020//Citrate cycle (TCA cycle)+ko01100//Metabolic pathways+ko00190//Oxidative phosphorylation+ko01110//Biosynthesis of secondary metabolites+ko01200//Carbon metabolism;K00234//succinate dehydrogenase (ubiquinone) flavoprotein subunit [EC:1.3.5.1]+ko00020//Citrate cycle (TCA cycle)+ko01100//Metabolic pathways+ko0019…	Fumarate reductase flavoprotein C-term		LOW QUALITY PROTEIN: succinate dehydrogenase subunit A [Chlamydomonas reinhardtii] >EDP09580.1 succinate dehydrogenase subunit A [Chlamydomonas reinhardtii]	[C] KOG2403 Succinate dehydrogenase, flavoprotein subunit	Succinate dehydrogenase [ubiquinone] flavoprotein subunit, mitochondrial OS=Oryza sativa subsp. japonica GN=SDH1 PE=1 SV=1	GO:0009055//electron transfer activity;GO:0006121//mitochondrial electron transport, succinate to ubiquinone;GO:0050660//flavin adenine dinucleotide binding;GO:0006099//tricarboxylic acid cycle;GO:0022900//electron transport chain;GO:0005749//mitochondrial respiratory chain complex II, succinate dehydrogenase complex (ubiquinone);GO:0000104//succinate dehydrogenase activity;GO:0005743//mitochondr…
Unigene65931_All	530	ko01100//Metabolic pathways;ko00190//Oxidative phosphorylation	Metabolism	Energy metabolism;Global and overview maps	-4.61937	0.000536232	0.000394685	K02261//cytochrome c oxidase subunit 2+ko01100//Metabolic pathways+ko00190//Oxidative phosphorylation;K02261//cytochrome c oxidase subunit 2+ko01100//Metabolic pathways+ko00190//Oxidative phosphorylation;K02261//cytochrome c oxidase subunit 2+ko01100//Metabolic pathways+ko00190//Oxidative phosphorylation;K02261//cytochrome c oxidase subunit 2+ko01100//Metabolic pathways+ko00190//Oxidative phospho…	Cytochrome C oxidase subunit II, transmembrane domain		hypothetical protein PHAVU_009G252600g [Phaseolus vulgaris] >ESW10951.1 hypothetical protein PHAVU_009G252600g [Phaseolus vulgaris]	[C] KOG4767 Cytochrome c oxidase, subunit II, and related proteins	Cytochrome c oxidase subunit 2, mitochondrial (Fragment) OS=Vigna unguiculata GN=COX2 PE=2 SV=2	GO:0022900//electron transport chain;GO:0004129//cytochrome-c oxidase activity;GO:0005507//copper ion binding;GO:0005743//mitochondrial inner membrane;GO:0016021//integral component of membrane;GO:0070469//respiratory chain
Unigene86782_All	397	ko01100//Metabolic pathways;ko00020//Citrate cycle (TCA cycle);ko01200//Carbon metabolism;ko01110//Biosynthesis of secondary metabolites;ko00190//Oxidative phosphorylation;ko00040//Pentose and glucuronate interconversions	Metabolism	Energy metabolism;Global and overview maps;Carbohydrate metabolism	-4.61937	0.000536232	0.000394685	K00236//succinate dehydrogenase (ubiquinone) cytochrome b560 subunit+ko00020//Citrate cycle (TCA cycle)+ko01100//Metabolic pathways+ko00190//Oxidative phosphorylation+ko01110//Biosynthesis of secondary metabolites+ko01200//Carbon metabolism;K00236//succinate dehydrogenase (ubiquinone) cytochrome b560 subunit+ko00020//Citrate cycle (TCA cycle)+ko01100//Metabolic pathways+ko00190//Oxidative phospho…	Succinate dehydrogenase/Fumarate reductase transmembrane subunit		hypothetical protein POPTR_0014s07830g [Populus trichocarpa] >ERP53132.1 hypothetical protein POPTR_0014s07830g [Populus trichocarpa]	[G] KOG0449 Succinate dehydrogenase, cytochrome b subunit	Proline-rich receptor-like protein kinase PERK2 OS=Arabidopsis thaliana GN=PERK2 PE=2 SV=3	GO:0006099//tricarboxylic acid cycle;GO:0000104//succinate dehydrogenase activity;GO:0046872//metal ion binding;GO:0005749//mitochondrial respiratory chain complex II, succinate dehydrogenase complex (ubiquinone);GO:0006121//mitochondrial electron transport, succinate to ubiquinone;GO:0016021//integral component of membrane
Unigene60649_All	523	ko01100//Metabolic pathways;ko00190//Oxidative phosphorylation	Metabolism	Energy metabolism;Global and overview maps	-4.73484	0.000298398	0.000210881	K02126//F-type H+-transporting ATPase subunit a+ko01100//Metabolic pathways+ko00190//Oxidative phosphorylation;K02126//F-type H+-transporting ATPase subunit a+ko01100//Metabolic pathways+ko00190//Oxidative phosphorylation;K02126//F-type H+-transporting ATPase subunit a+ko01100//Metabolic pathways+ko00190//Oxidative phosphorylation;K02126//F-type H+-transporting ATPase subunit a+ko01100//Metabolic…			ATP synthase F0 subunit 6 (mitochondrion) [Trebouxiophyceae sp. MX-AZ01] >AFQ93755.1 ATP synthase F0 subunit 6 (mitochondrion) [Trebouxiophyceae sp. MX-AZ01]	[C] KOG4665 ATP synthase F0 subunit 6 and related proteins	ATP synthase subunit a OS=Marchantia polymorpha GN=ATP6 PE=3 SV=2	GO:0015986//ATP synthesis coupled proton transport;GO:0016787//hydrolase activity;GO:0045263//proton-transporting ATP synthase complex, coupling factor F(o);GO:0005743//mitochondrial inner membrane;GO:0016021//integral component of membrane;GO:0015078//hydrogen ion transmembrane transporter activity
Unigene65135_All	535	ko01100//Metabolic pathways;ko00190//Oxidative phosphorylation	Metabolism	Energy metabolism;Global and overview maps	-4.73484	0.000298398	0.000210881	K00356//NADH dehydrogenase [EC:1.6.99.3]+ko00190//Oxidative phosphorylation;K03953//NADH dehydrogenase (ubiquinone) 1 alpha subcomplex subunit 9+ko01100//Metabolic pathways+ko00190//Oxidative phosphorylation;K03953//NADH dehydrogenase (ubiquinone) 1 alpha subcomplex subunit 9+ko01100//Metabolic pathways+ko00190//Oxidative phosphorylation;K03953//NADH dehydrogenase (ubiquinone) 1 alpha subcomplex …			NADH dehydrogenase [Galdieria sulphuraria] >EME30459.1 NADH dehydrogenase [Galdieria sulphuraria]	[C] KOG2865 NADH:ubiquinone oxidoreductase, NDUFA9/39kDa subunit	NADH dehydrogenase [ubiquinone] 1 alpha subcomplex subunit 9, mitochondrial OS=Arabidopsis thaliana GN=At2g20360 PE=1 SV=2	GO:0003824//catalytic activity;GO:0008137//NADH dehydrogenase (ubiquinone) activity;GO:0050662//coenzyme binding
Unigene86370_All	570	ko00190//Oxidative phosphorylation;ko01100//Metabolic pathways	Metabolism	Global and overview maps;Energy metabolism	-4.73484	0.000298398	0.000210881	K00411//ubiquinol-cytochrome c reductase iron-sulfur subunit [EC:7.1.1.8]+ko01100//Metabolic pathways+ko00190//Oxidative phosphorylation;K00411//ubiquinol-cytochrome c reductase iron-sulfur subunit [EC:7.1.1.8]+ko01100//Metabolic pathways+ko00190//Oxidative phosphorylation;K00411//ubiquinol-cytochrome c reductase iron-sulfur subunit [EC:7.1.1.8]+ko01100//Metabolic pathways+ko00190//Oxidative phos…	Ubiquinol cytochrome reductase transmembrane region	XM_001689730.1 Chlamydomonas reinhardtii rieske iron-sulfur protein of mitochondrial ubiquinol-cytochrome c reductase (RIP1), mRNA	cytochrome bc1 complex subunit Rieske putative [Albugo laibachii Nc14]	[C] KOG1671 Ubiquinol cytochrome c reductase, subunit RIP1	Cytochrome b-c1 complex subunit Rieske-3, mitochondrial OS=Nicotiana tabacum PE=2 SV=1	GO:0016020//membrane;GO:0051537//2 iron, 2 sulfur cluster binding;GO:0008121//ubiquinol-cytochrome-c reductase activity
CL3481.Contig2_All	894	ko01100//Metabolic pathways;ko00190//Oxidative phosphorylation	Metabolism	Energy metabolism;Global and overview maps	-4.7791	2.00931e-07	9.80841e-08	K03942//NADH dehydrogenase (ubiquinone) flavoprotein 1 [EC:7.1.1.2 1.6.99.3]+ko01100//Metabolic pathways+ko00190//Oxidative phosphorylation;K03942//NADH dehydrogenase (ubiquinone) flavoprotein 1 [EC:7.1.1.2 1.6.99.3]+ko01100//Metabolic pathways+ko00190//Oxidative phosphorylation;K03942//NADH dehydrogenase (ubiquinone) flavoprotein 1 [EC:7.1.1.2 1.6.99.3]+ko01100//Metabolic pathways+ko00190//Oxida…	Respiratory-chain NADH dehydrogenase 51 Kd subunit	XM_011400443.1 Auxenochlorella protothecoides NADH dehydrogenase [ubiquinone] flavoprotein 1, mitochondrial partial mRNA	hypothetical protein AXG93_977s1130 [Marchantia polymorpha subsp. ruderalis]	[C] KOG2658 NADH:ubiquinone oxidoreductase, NDUFV1/51kDa subunit	NADH dehydrogenase [ubiquinone] flavoprotein 1, mitochondrial OS=Arabidopsis thaliana GN=At5g08530 PE=1 SV=1	GO:0046872//metal ion binding;GO:0010181//FMN binding;GO:0051539//4 iron, 4 sulfur cluster binding;GO:0005743//mitochondrial inner membrane;GO:0051287//NAD binding;GO:0070469//respiratory chain;GO:0008137//NADH dehydrogenase (ubiquinone) activity
Unigene48058_All	991	ko00190//Oxidative phosphorylation;ko00195//Photosynthesis;ko01100//Metabolic pathways	Metabolism	Global and overview maps;Energy metabolism	-4.78929	1.79977e-07	8.74502e-08	K02109//F-type H+-transporting ATPase subunit b+ko01100//Metabolic pathways+ko00190//Oxidative phosphorylation+ko00195//Photosynthesis;K02109//F-type H+-transporting ATPase subunit b+ko01100//Metabolic pathways+ko00190//Oxidative phosphorylation+ko00195//Photosynthesis;K02109//F-type H+-transporting ATPase subunit b+ko01100//Metabolic pathways+ko00190//Oxidative phosphorylation+ko00195//Photosynt…	ATP synthase B/B' CF(0)		F-ATPase family transporter: protons (mitochondrial) [Ostreococcus lucimarinus CCE9901] >ABO94039.1 F-ATPase family transporter: protons (mitochondrial) [Ostreococcus lucimarinus CCE9901]	[C] KOG0232 Vacuolar H+-ATPase V0 sector, subunits c/c'	ATP synthase subunit C, cyanelle OS=Cyanophora paradoxa GN=atpE PE=3 SV=1	GO:0015986//ATP synthesis coupled proton transport;GO:0045263//proton-transporting ATP synthase complex, coupling factor F(o);GO:0016021//integral component of membrane;GO:0015078//hydrogen ion transmembrane transporter activity;GO:0009536//plastid;GO:0005886//plasma membrane;GO:0046933//proton-transporting ATP synthase activity, rotational mechanism
CL6339.Contig1_All	555	ko01100//Metabolic pathways;ko00190//Oxidative phosphorylation	Metabolism	Global and overview maps;Energy metabolism	-4.84176	0.000167012	0.00011332	K02256//cytochrome c oxidase subunit 1 [EC:1.9.3.1]+ko01100//Metabolic pathways+ko00190//Oxidative phosphorylation;K02256//cytochrome c oxidase subunit 1 [EC:1.9.3.1]+ko01100//Metabolic pathways+ko00190//Oxidative phosphorylation;K02256//cytochrome c oxidase subunit 1 [EC:1.9.3.1]+ko01100//Metabolic pathways+ko00190//Oxidative phosphorylation;K02256//cytochrome c oxidase subunit 1 [EC:1.9.3.1]+ko…			cytochrome c oxidase subunit 1 (mitochondrion) [Closterium baillyanum] >AGZ90272.1 cytochrome c oxidase subunit 1 (mitochondrion) [Closterium baillyanum]	[C] KOG4769 Cytochrome c oxidase, subunit I	Cytochrome c oxidase subunit 1 OS=Beta vulgaris GN=COX1 PE=3 SV=2	GO:0020037//heme binding;GO:0005506//iron ion binding;GO:0004129//cytochrome-c oxidase activity;GO:0045277//respiratory chain complex IV;GO:0009060//aerobic respiration;GO:0006119//oxidative phosphorylation;GO:0022900//electron transport chain;GO:0005507//copper ion binding;GO:0016021//integral component of membrane;GO:0005743//mitochondrial inner membrane;GO:0005886//plasma membrane
Unigene46712_All	917	ko00195//Photosynthesis;ko00190//Oxidative phosphorylation;ko01100//Metabolic pathways	Metabolism	Global and overview maps;Energy metabolism	-4.84176	1.00728e-07	4.78635e-08	K02109//F-type H+-transporting ATPase subunit b+ko01100//Metabolic pathways+ko00190//Oxidative phosphorylation+ko00195//Photosynthesis;K02110//F-type H+-transporting ATPase subunit c+ko01100//Metabolic pathways+ko00190//Oxidative phosphorylation+ko00195//Photosynthesis;K02110//F-type H+-transporting ATPase subunit c+ko01100//Metabolic pathways+ko00190//Oxidative phosphorylation+ko00195//Photosynt…	ATP synthase B/B' CF(0)		ATP synthase CF0 C subunit [Cyanophora paradoxa] >P48086.1 RecName: Full=ATP synthase subunit C, cyanelle; AltName: Full=ATP synthase F0 sector subunit C; AltName: Full=ATPase subunit III; AltName: Full=Lipid-binding protein >AAA81257.1 c subunit of the F0 portion of ATP synthase [Cyanophora paradoxa] >AIU44581.1 ATP synthase CF0 C subunit (cyanelle) [Cyanophora paradoxa]	[C] KOG0232 Vacuolar H+-ATPase V0 sector, subunits c/c'	ATP synthase subunit C, cyanelle OS=Cyanophora paradoxa GN=atpE PE=3 SV=1	GO:0033115//cyanelle thylakoid membrane;GO:0009535//chloroplast thylakoid membrane;GO:0015986//ATP synthesis coupled proton transport;GO:0008289//lipid binding;GO:0015991//ATP hydrolysis coupled proton transport;GO:0045263//proton-transporting ATP synthase complex, coupling factor F(o);GO:0016021//integral component of membrane;GO:0009536//plastid;GO:0015078//hydrogen ion transmembrane transporte…
Unigene75597_All	586	ko00190//Oxidative phosphorylation;ko01100//Metabolic pathways	Metabolism	Global and overview maps;Energy metabolism	-4.84176	0.000167012	0.00011332	K03879//NADH-ubiquinone oxidoreductase chain 2 [EC:7.1.1.2]+ko01100//Metabolic pathways+ko00190//Oxidative phosphorylation;K03879//NADH-ubiquinone oxidoreductase chain 2 [EC:7.1.1.2]+ko01100//Metabolic pathways+ko00190//Oxidative phosphorylation;K03879//NADH-ubiquinone oxidoreductase chain 2 [EC:7.1.1.2]+ko01100//Metabolic pathways+ko00190//Oxidative phosphorylation;K03879//NADH-ubiquinone oxidor…	Proton-conducting membrane transporter		NADH dehydrogenase subunit 2 (mitochondrion) [Nephroselmis olivacea] >AAF03177.1 NADH dehydrogenase subunit 2 (mitochondrion) [Nephroselmis olivacea]	[C] KOG4668 NADH dehydrogenase subunits 2, 5, and related proteins	NAD(P)H-quinone oxidoreductase subunit 2 B, chloroplastic OS=Anthoceros formosae GN=ndhB2 PE=2 SV=1	GO:0016021//integral component of membrane;GO:0042773//ATP synthesis coupled electron transport;GO:0005739//mitochondrion;GO:0008137//NADH dehydrogenase (ubiquinone) activity
Unigene86129_All	497	ko00860//Porphyrin and chlorophyll metabolism;ko01110//Biosynthesis of secondary metabolites;ko00190//Oxidative phosphorylation;ko01100//Metabolic pathways	Metabolism	Energy metabolism;Metabolism of cofactors and vitamins;Global and overview maps	-4.84176	0.000167012	0.00011332	K02259//cytochrome c oxidase assembly protein subunit 15+ko00860//Porphyrin and chlorophyll metabolism+ko01100//Metabolic pathways+ko00190//Oxidative phosphorylation+ko01110//Biosynthesis of secondary metabolites;K02259//cytochrome c oxidase assembly protein subunit 15+ko00860//Porphyrin and chlorophyll metabolism+ko01100//Metabolic pathways+ko00190//Oxidative phosphorylation+ko01110//Biosynthesi…	Cytochrome oxidase assembly protein		PREDICTED: cytochrome c oxidase assembly protein COX15 [Fragaria vesca subsp. vesca]	[O] KOG2725 Cytochrome oxidase assembly factor COX15	Cytochrome c oxidase assembly protein COX15 OS=Arabidopsis thaliana GN=COX15 PE=2 SV=1	GO:0016627//oxidoreductase activity, acting on the CH-CH group of donors;GO:0006784//heme a biosynthetic process;GO:0016021//integral component of membrane
Unigene25034_All	1540	ko00190//Oxidative phosphorylation;ko01100//Metabolic pathways	Metabolism	Global and overview maps;Energy metabolism	-4.89239	1.13495e-14	3.55341e-15	K02132//F-type H+-transporting ATPase subunit alpha+ko01100//Metabolic pathways+ko00190//Oxidative phosphorylation;K02132//F-type H+-transporting ATPase subunit alpha+ko01100//Metabolic pathways+ko00190//Oxidative phosphorylation;K02132//F-type H+-transporting ATPase subunit alpha+ko01100//Metabolic pathways+ko00190//Oxidative phosphorylation;K02132//F-type H+-transporting ATPase subunit alpha+ko…	ATP synthase alpha/beta family, nucleotide-binding domain	KM462867.1 Pedinomonas tuberculata culture-collection SAG:42.84 chloroplast, complete genome	hypothetical protein SOVF_209290, partial [Spinacia oleracea]	[C] KOG1353 F0F1-type ATP synthase, alpha subunit	ATP synthase subunit alpha, chloroplastic OS=Rhodomonas salina GN=atpA PE=3 SV=1	GO:0015986//ATP synthesis coupled proton transport;GO:0045261//proton-transporting ATP synthase complex, catalytic core F(1);GO:0009535//chloroplast thylakoid membrane;GO:0005524//ATP binding;GO:0046933//proton-transporting ATP synthase activity, rotational mechanism
CL5667.Contig3_All	528	ko01200//Carbon metabolism;ko01100//Metabolic pathways;ko00190//Oxidative phosphorylation;ko00020//Citrate cycle (TCA cycle);ko01110//Biosynthesis of secondary metabolites	Metabolism	Energy metabolism;Carbohydrate metabolism;Global and overview maps	-4.9413	9.37088e-05	6.12248e-05	K00234//succinate dehydrogenase (ubiquinone) flavoprotein subunit [EC:1.3.5.1]+ko00020//Citrate cycle (TCA cycle)+ko01100//Metabolic pathways+ko00190//Oxidative phosphorylation+ko01110//Biosynthesis of secondary metabolites+ko01200//Carbon metabolism;K00234//succinate dehydrogenase (ubiquinone) flavoprotein subunit [EC:1.3.5.1]+ko00020//Citrate cycle (TCA cycle)+ko01100//Metabolic pathways+ko0019…	FAD binding domain		hypothetical protein GUITHDRAFT_159138 [Guillardia theta CCMP2712] >EKX54553.1 hypothetical protein GUITHDRAFT_159138 [Guillardia theta CCMP2712]	[C] KOG2403 Succinate dehydrogenase, flavoprotein subunit	Succinate dehydrogenase [ubiquinone] flavoprotein subunit, mitochondrial OS=Oryza sativa subsp. japonica GN=SDH1 PE=1 SV=1	GO:0009055//electron transfer activity;GO:0006121//mitochondrial electron transport, succinate to ubiquinone;GO:0050660//flavin adenine dinucleotide binding;GO:0006099//tricarboxylic acid cycle;GO:0005749//mitochondrial respiratory chain complex II, succinate dehydrogenase complex (ubiquinone);GO:0000104//succinate dehydrogenase activity;GO:0022900//electron transport chain;GO:0005743//mitochondr…
Unigene67290_All	682	ko01100//Metabolic pathways;ko00190//Oxidative phosphorylation	Metabolism	Energy metabolism;Global and overview maps	-4.9413	9.37088e-05	6.12248e-05	K02132//F-type H+-transporting ATPase subunit alpha+ko01100//Metabolic pathways+ko00190//Oxidative phosphorylation;K02132//F-type H+-transporting ATPase subunit alpha+ko01100//Metabolic pathways+ko00190//Oxidative phosphorylation;K02132//F-type H+-transporting ATPase subunit alpha+ko01100//Metabolic pathways+ko00190//Oxidative phosphorylation;K02132//F-type H+-transporting ATPase subunit alpha+ko…	ATP synthase alpha/beta family, nucleotide-binding domain		hypothetical protein SOVF_209290, partial [Spinacia oleracea]	[C] KOG1353 F0F1-type ATP synthase, alpha subunit	ATP synthase subunit alpha, mitochondrial OS=Marchantia polymorpha GN=ATPA PE=3 SV=2	GO:0015986//ATP synthesis coupled proton transport;GO:0045261//proton-transporting ATP synthase complex, catalytic core F(1);GO:0005524//ATP binding;GO:0005739//mitochondrion;GO:0046933//proton-transporting ATP synthase activity, rotational mechanism
Unigene70712_All	635	ko01100//Metabolic pathways;ko00190//Oxidative phosphorylation	Metabolism	Global and overview maps;Energy metabolism	-4.9413	9.37088e-05	6.12248e-05	K03934//NADH dehydrogenase (ubiquinone) Fe-S protein 1 [EC:7.1.1.2 1.6.99.3]+ko01100//Metabolic pathways+ko00190//Oxidative phosphorylation;K03934//NADH dehydrogenase (ubiquinone) Fe-S protein 1 [EC:7.1.1.2 1.6.99.3]+ko01100//Metabolic pathways+ko00190//Oxidative phosphorylation;K03934//NADH dehydrogenase (ubiquinone) Fe-S protein 1 [EC:7.1.1.2 1.6.99.3]+ko01100//Metabolic pathways+ko00190//Oxida…	Molybdopterin oxidoreductase		NADH dehydrogenase (ubiquinone) Fe-S protein 1 [Nannochloropsis gaditana CCMP526] >EKU23397.1 NADH dehydrogenase (ubiquinone) Fe-S protein 1 [Nannochloropsis gaditana CCMP526]	[C] KOG2282 NADH-ubiquinone oxidoreductase, NDUFS1/75 kDa subunit	NADH dehydrogenase [ubiquinone] iron-sulfur protein 1, mitochondrial OS=Solanum tuberosum PE=2 SV=1	GO:0009055//electron transfer activity;GO:0016020//membrane;GO:0042773//ATP synthesis coupled electron transport;GO:0051536//iron-sulfur cluster binding;GO:0006979//response to oxidative stress;GO:0005747//mitochondrial respiratory chain complex I;GO:0045333//cellular respiration;GO:0008137//NADH dehydrogenase (ubiquinone) activity;GO:0009507//chloroplast
Unigene87455_All	441	ko00190//Oxidative phosphorylation;ko01100//Metabolic pathways	Metabolism	Energy metabolism;Global and overview maps	-4.9413	9.37088e-05	6.12248e-05	K02133//F-type H+-transporting ATPase subunit beta [EC:7.1.2.2]+ko01100//Metabolic pathways+ko00190//Oxidative phosphorylation;K02133//F-type H+-transporting ATPase subunit beta [EC:7.1.2.2]+ko01100//Metabolic pathways+ko00190//Oxidative phosphorylation;K02133//F-type H+-transporting ATPase subunit beta [EC:7.1.2.2]+ko01100//Metabolic pathways+ko00190//Oxidative phosphorylation;K02133//F-type H+-…	ATP synthase alpha/beta family, nucleotide-binding domain	XM_001691580.1 Chlamydomonas reinhardtii beta subunit of mitochondrial ATP synthase (ATP2), mRNA	hypothetical protein COCSUDRAFT_48882 [Coccomyxa subellipsoidea C-169] >EIE19260.1 hypothetical protein COCSUDRAFT_48882 [Coccomyxa subellipsoidea C-169]	[C] KOG1350 F0F1-type ATP synthase, beta subunit	ATP synthase subunit beta, mitochondrial OS=Hevea brasiliensis GN=ATPB PE=2 SV=1	GO:0015986//ATP synthesis coupled proton transport;GO:0045261//proton-transporting ATP synthase complex, catalytic core F(1);GO:0005524//ATP binding;GO:0046933//proton-transporting ATP synthase activity, rotational mechanism
CL1013.Contig1_All	510	ko01100//Metabolic pathways;ko00190//Oxidative phosphorylation	Metabolism	Energy metabolism;Global and overview maps	-5.0344	5.26998e-05	3.32497e-05	K02262//cytochrome c oxidase subunit 3+ko01100//Metabolic pathways+ko00190//Oxidative phosphorylation;K02262//cytochrome c oxidase subunit 3+ko01100//Metabolic pathways+ko00190//Oxidative phosphorylation;K02262//cytochrome c oxidase subunit 3+ko01100//Metabolic pathways+ko00190//Oxidative phosphorylation;K02262//cytochrome c oxidase subunit 3+ko01100//Metabolic pathways+ko00190//Oxidative phospho…	Cytochrome c oxidase subunit III		cytochrome oxidase subunit III, partial (mitochondrion) [Cosmarium granatum]	[C] KOG4664 Cytochrome oxidase subunit III and related proteins	Cytochrome c oxidase subunit 3 OS=Chondrus crispus GN=COX3 PE=3 SV=1	GO:0019646//aerobic electron transport chain;GO:0004129//cytochrome-c oxidase activity;GO:0016021//integral component of membrane;GO:0005739//mitochondrion
Unigene28174_All	583	ko01100//Metabolic pathways;ko00190//Oxidative phosphorylation	Metabolism	Energy metabolism;Global and overview maps	-5.0344	5.26998e-05	3.32497e-05	K03955//NADH dehydrogenase (ubiquinone) 1 alpha/beta subcomplex 1+ko01100//Metabolic pathways+ko00190//Oxidative phosphorylation;K03955//NADH dehydrogenase (ubiquinone) 1 alpha/beta subcomplex 1+ko01100//Metabolic pathways+ko00190//Oxidative phosphorylation;K03955//NADH dehydrogenase (ubiquinone) 1 alpha/beta subcomplex 1+ko01100//Metabolic pathways+ko00190//Oxidative phosphorylation;K03955//NADH…			Acyl transferase domain containing protein [Dorcoceras hygrometricum]	[CIQ] KOG1748 Acyl carrier protein/NADH-ubiquinone oxidoreductase, NDUFAB1/SDAP subunit	Acyl carrier protein OS=Guillardia theta GN=acpP PE=3 SV=1	GO:0000036//acyl carrier activity;GO:0009507//chloroplast
Unigene47403_All	377	ko01100//Metabolic pathways;ko00190//Oxidative phosphorylation	Metabolism	Energy metabolism;Global and overview maps	-5.0344	5.26998e-05	3.32497e-05	K03937//NADH dehydrogenase (ubiquinone) Fe-S protein 4+ko01100//Metabolic pathways+ko00190//Oxidative phosphorylation;K03937//NADH dehydrogenase (ubiquinone) Fe-S protein 4+ko01100//Metabolic pathways+ko00190//Oxidative phosphorylation;K03937//NADH dehydrogenase (ubiquinone) Fe-S protein 4+ko01100//Metabolic pathways+ko00190//Oxidative phosphorylation;K03937//NADH dehydrogenase (ubiquinone) Fe-S …	ETC complex I subunit conserved region		PREDICTED: NADH dehydrogenase [ubiquinone] iron-sulfur protein 4, mitochondrial [Daucus carota subsp. sativus]	[C] KOG3389 NADH:ubiquinone oxidoreductase, NDUFS4/18 kDa subunit	NADH dehydrogenase [ubiquinone] iron-sulfur protein 4, mitochondrial OS=Arabidopsis thaliana GN=FRO1 PE=1 SV=1
Unigene61447_All	1036	ko01100//Metabolic pathways;ko00190//Oxidative phosphorylation;ko00195//Photosynthesis	Metabolism	Energy metabolism;Global and overview maps	-5.0788	5.61589e-09	2.42483e-09	K02115//F-type H+-transporting ATPase subunit gamma+ko01100//Metabolic pathways+ko00190//Oxidative phosphorylation+ko00195//Photosynthesis;K02115//F-type H+-transporting ATPase subunit gamma+ko01100//Metabolic pathways+ko00190//Oxidative phosphorylation+ko00195//Photosynthesis;K02115//F-type H+-transporting ATPase subunit gamma+ko01100//Metabolic pathways+ko00190//Oxidative phosphorylation+ko0019…	ATP synthase		ATP synthase subunit C (chromatophore) [Paulinella chromatophora] >ACB42656.1 ATP synthase subunit C (chromatophore) [Paulinella chromatophora]	[C] KOG1531 F0F1-type ATP synthase, gamma subunit	ATP synthase gamma chain, chloroplastic OS=Pisum sativum GN=ATPC PE=2 SV=1	GO:0015986//ATP synthesis coupled proton transport;GO:0045261//proton-transporting ATP synthase complex, catalytic core F(1);GO:0009536//plastid;GO:0046933//proton-transporting ATP synthase activity, rotational mechanism
Unigene61690_All	898	ko00190//Oxidative phosphorylation;ko01100//Metabolic pathways	Metabolism	Energy metabolism;Global and overview maps	-5.12187	3.16679e-09	1.34345e-09	K03935//NADH dehydrogenase (ubiquinone) Fe-S protein 2 [EC:7.1.1.2 1.6.99.3]+ko01100//Metabolic pathways+ko00190//Oxidative phosphorylation;K03935//NADH dehydrogenase (ubiquinone) Fe-S protein 2 [EC:7.1.1.2 1.6.99.3]+ko01100//Metabolic pathways+ko00190//Oxidative phosphorylation;K03935//NADH dehydrogenase (ubiquinone) Fe-S protein 2 [EC:7.1.1.2 1.6.99.3]+ko01100//Metabolic pathways+ko00190//Oxida…	Respiratory-chain NADH dehydrogenase, 49 Kd subunit		NADH dehydrogenase subunit 7 (mitochondrion) [Pseudoperonospora cubensis] >AKZ29827.1 NADH dehydrogenase subunit 7 (mitochondrion) [Pseudoperonospora cubensis]	[C] KOG2870 NADH:ubiquinone oxidoreductase, NDUFS2/49 kDa subunit	NADH dehydrogenase [ubiquinone] iron-sulfur protein 2 OS=Nephroselmis olivacea GN=NAD7 PE=3 SV=1	GO:0016651//oxidoreductase activity, acting on NAD(P)H;GO:0048038//quinone binding;GO:0051287//NAD binding;GO:0005739//mitochondrion;GO:0008137//NADH dehydrogenase (ubiquinone) activity
Unigene67162_All	596	ko01100//Metabolic pathways;ko00190//Oxidative phosphorylation	Metabolism	Energy metabolism;Global and overview maps	-5.12187	2.96514e-05	1.81461e-05	K03884//NADH-ubiquinone oxidoreductase chain 6 [EC:7.1.1.2]+ko01100//Metabolic pathways+ko00190//Oxidative phosphorylation;K03884//NADH-ubiquinone oxidoreductase chain 6 [EC:7.1.1.2]+ko01100//Metabolic pathways+ko00190//Oxidative phosphorylation;K03884//NADH-ubiquinone oxidoreductase chain 6 [EC:7.1.1.2]+ko01100//Metabolic pathways+ko00190//Oxidative phosphorylation;K03884//NADH-ubiquinone oxidor…	NADH-ubiquinone/plastoquinone oxidoreductase chain 6		NADH dehydrogenase subunit 6 (mitochondrion) [Triparma laevis] >BAS19186.1 NADH dehydrogenase subunit 6 (mitochondrion) [Triparma laevis]	[C] LSE2019 A ATPase subunit 9, and related proteins	NADH-ubiquinone oxidoreductase chain 6 OS=Marchantia polymorpha GN=ND6 PE=2 SV=2	GO:0016021//integral component of membrane;GO:0005739//mitochondrion;GO:0008137//NADH dehydrogenase (ubiquinone) activity
Unigene86604_All	355	ko00190//Oxidative phosphorylation;ko01100//Metabolic pathways	Metabolism	Global and overview maps;Energy metabolism	-5.12187	2.96514e-05	1.81461e-05	K03955//NADH dehydrogenase (ubiquinone) 1 alpha/beta subcomplex 1+ko01100//Metabolic pathways+ko00190//Oxidative phosphorylation;K03955//NADH dehydrogenase (ubiquinone) 1 alpha/beta subcomplex 1+ko01100//Metabolic pathways+ko00190//Oxidative phosphorylation;K03955//NADH dehydrogenase (ubiquinone) 1 alpha/beta subcomplex 1+ko01100//Metabolic pathways+ko00190//Oxidative phosphorylation;K03955//NADH…	Phosphopantetheine attachment site		mitochondrial acyl carrier protein [Klebsormidium nitens]	[CIQ] KOG1748 Acyl carrier protein/NADH-ubiquinone oxidoreductase, NDUFAB1/SDAP subunit	Acyl carrier protein 1, mitochondrial OS=Arabidopsis thaliana GN=MTACP1 PE=1 SV=1
Unigene37925_All	1449	ko00190//Oxidative phosphorylation	Metabolism	Energy metabolism	-5.13905	3.51769e-219	1.57205e-220	K01507//inorganic pyrophosphatase [EC:3.6.1.1]+ko00190//Oxidative phosphorylation;K01507//inorganic pyrophosphatase [EC:3.6.1.1]+ko00190//Oxidative phosphorylation;K01507//inorganic pyrophosphatase [EC:3.6.1.1]+ko00190//Oxidative phosphorylation;K01507//inorganic pyrophosphatase [EC:3.6.1.1]+ko00190//Oxidative phosphorylation;K01507//inorganic pyrophosphatase [EC:3.6.1.1]+ko00190//Oxidative phosp…	Inorganic pyrophosphatase	CT831686.1 Oryza sativa (indica cultivar-group) cDNA clone:OSIGCRA128O17, full insert sequence	hypothetical protein M569_10470, partial [Genlisea aurea]	[C] KOG1626 Inorganic pyrophosphatase/Nucleosome remodeling factor, subunit NURF38	Soluble inorganic pyrophosphatase OS=Oryza sativa subsp. indica GN=IPP PE=2 SV=1	GO:0000287//magnesium ion binding;GO:0004427//inorganic diphosphatase activity;GO:0006796//phosphate-containing compound metabolic process;GO:0005737//cytoplasm
CL3481.Contig1_All	2018	ko00190//Oxidative phosphorylation;ko01100//Metabolic pathways	Metabolism	Global and overview maps;Energy metabolism	-5.14293	9.26462e-50	1.24955e-50	K03942//NADH dehydrogenase (ubiquinone) flavoprotein 1 [EC:7.1.1.2 1.6.99.3]+ko01100//Metabolic pathways+ko00190//Oxidative phosphorylation;K03942//NADH dehydrogenase (ubiquinone) flavoprotein 1 [EC:7.1.1.2 1.6.99.3]+ko01100//Metabolic pathways+ko00190//Oxidative phosphorylation;K03942//NADH dehydrogenase (ubiquinone) flavoprotein 1 [EC:7.1.1.2 1.6.99.3]+ko01100//Metabolic pathways+ko00190//Oxida…	Respiratory-chain NADH dehydrogenase 51 Kd subunit		NADH dehydrogenase [ubiquinone] flavoprotein 1, mitochondrial-like [Solanum tuberosum] >CAA58823.1 NADH dehydrogenase [Solanum tuberosum]	[C] KOG2658 NADH:ubiquinone oxidoreductase, NDUFV1/51kDa subunit	NADH dehydrogenase [ubiquinone] flavoprotein 1, mitochondrial OS=Arabidopsis thaliana GN=At5g08530 PE=1 SV=1	GO:0046872//metal ion binding;GO:0010181//FMN binding;GO:0051539//4 iron, 4 sulfur cluster binding;GO:0005743//mitochondrial inner membrane;GO:0051287//NAD binding;GO:0070469//respiratory chain;GO:0008137//NADH dehydrogenase (ubiquinone) activity
Unigene57305_All	1467	ko00190//Oxidative phosphorylation;ko01100//Metabolic pathways	Metabolism	Global and overview maps;Energy metabolism	-5.16369	1.14042e-17	3.14828e-18	K02132//F-type H+-transporting ATPase subunit alpha+ko01100//Metabolic pathways+ko00190//Oxidative phosphorylation;K02132//F-type H+-transporting ATPase subunit alpha+ko01100//Metabolic pathways+ko00190//Oxidative phosphorylation;K02132//F-type H+-transporting ATPase subunit alpha+ko01100//Metabolic pathways+ko00190//Oxidative phosphorylation;K02132//F-type H+-transporting ATPase subunit alpha+ko…	ATP synthase	XM_004253314.1 PREDICTED: Solanum lycopersicum ATP synthase subunit alpha (LOC101255871), mRNA	PREDICTED: uncharacterized protein LOC101255871 [Solanum lycopersicum]	[C] KOG1353 F0F1-type ATP synthase, alpha subunit	ATP synthase subunit alpha, mitochondrial OS=Oenothera biennis GN=ATPA PE=3 SV=1	GO:0015986//ATP synthesis coupled proton transport;GO:0045261//proton-transporting ATP synthase complex, catalytic core F(1);GO:0005524//ATP binding;GO:0005739//mitochondrion;GO:0046933//proton-transporting ATP synthase activity, rotational mechanism
Unigene87818_All	540	ko01100//Metabolic pathways;ko00190//Oxidative phosphorylation	Metabolism	Global and overview maps;Energy metabolism	-5.20433	1.67523e-05	9.94983e-06	K03942//NADH dehydrogenase (ubiquinone) flavoprotein 1 [EC:7.1.1.2 1.6.99.3]+ko01100//Metabolic pathways+ko00190//Oxidative phosphorylation;K03942//NADH dehydrogenase (ubiquinone) flavoprotein 1 [EC:7.1.1.2 1.6.99.3]+ko01100//Metabolic pathways+ko00190//Oxidative phosphorylation;K03942//NADH dehydrogenase (ubiquinone) flavoprotein 1 [EC:7.1.1.2 1.6.99.3]+ko01100//Metabolic pathways+ko00190//Oxida…	NADH-ubiquinone oxidoreductase-F iron-sulfur binding region		NADH dehydrogenase (ubiquinone) flavoprotein 1 [Fistulifera solaris]	[C] KOG2658 NADH:ubiquinone oxidoreductase, NDUFV1/51kDa subunit	NADH dehydrogenase [ubiquinone] flavoprotein 1, mitochondrial OS=Arabidopsis thaliana GN=At5g08530 PE=1 SV=1	GO:0046872//metal ion binding;GO:0010181//FMN binding;GO:0051539//4 iron, 4 sulfur cluster binding;GO:0005743//mitochondrial inner membrane;GO:0051287//NAD binding;GO:0070469//respiratory chain;GO:0008137//NADH dehydrogenase (ubiquinone) activity
Unigene86006_All	649	ko01100//Metabolic pathways;ko01110//Biosynthesis of secondary metabolites;ko00020//Citrate cycle (TCA cycle);ko01200//Carbon metabolism;ko00190//Oxidative phosphorylation	Metabolism	Energy metabolism;Global and overview maps;Carbohydrate metabolism	-5.28233	9.50308e-06	5.48026e-06	K00234//succinate dehydrogenase (ubiquinone) flavoprotein subunit [EC:1.3.5.1]+ko00020//Citrate cycle (TCA cycle)+ko01100//Metabolic pathways+ko00190//Oxidative phosphorylation+ko01110//Biosynthesis of secondary metabolites+ko01200//Carbon metabolism;K00234//succinate dehydrogenase (ubiquinone) flavoprotein subunit [EC:1.3.5.1]+ko00020//Citrate cycle (TCA cycle)+ko01100//Metabolic pathways+ko0019…	FAD binding domain	XM_009040194.1 Aureococcus anophagefferens hypothetical protein mRNA	succinate dehydrogenase flavoprotein [Phaeodactylum tricornutum CCAP 1055/1] >ACI65968.1 succinate dehydrogenase flavoprotein [Phaeodactylum tricornutum CCAP 1055/1]	[C] KOG2403 Succinate dehydrogenase, flavoprotein subunit	Succinate dehydrogenase [ubiquinone] flavoprotein subunit 2, mitochondrial OS=Arabidopsis thaliana GN=SDH1-2 PE=1 SV=1	GO:0009055//electron transfer activity;GO:0006121//mitochondrial electron transport, succinate to ubiquinone;GO:0050660//flavin adenine dinucleotide binding;GO:0006099//tricarboxylic acid cycle;GO:0022900//electron transport chain;GO:0005749//mitochondrial respiratory chain complex II, succinate dehydrogenase complex (ubiquinone);GO:0000104//succinate dehydrogenase activity;GO:0005743//mitochondr…
Unigene31393_All	443	ko00190//Oxidative phosphorylation;ko01100//Metabolic pathways;ko00195//Photosynthesis	Metabolism	Global and overview maps;Energy metabolism	-5.35633	5.39685e-06	3.03151e-06	K02133//F-type H+-transporting ATPase subunit beta [EC:7.1.2.2]+ko01100//Metabolic pathways+ko00190//Oxidative phosphorylation;K02112//F-type H+/Na+-transporting ATPase subunit beta [EC:7.1.2.2 7.2.2.1]+ko01100//Metabolic pathways+ko00190//Oxidative phosphorylation+ko00195//Photosynthesis;K02133//F-type H+-transporting ATPase subunit beta [EC:7.1.2.2]+ko01100//Metabolic pathways+ko00190//Oxidativ…			ATP synthase CF1 beta subunit [Cyanophora paradoxa] >P48081.1 RecName: Full=ATP synthase subunit beta, cyanelle; AltName: Full=ATP synthase F1 sector subunit beta; AltName: Full=F-ATPase subunit beta >AAA81272.1 beta subunit of the F1 portion of ATP synthase [Cyanophora paradoxa]	[C] KOG1350 F0F1-type ATP synthase, beta subunit	ATP synthase subunit beta, cyanelle OS=Cyanophora paradoxa GN=atpB PE=3 SV=1	GO:0015986//ATP synthesis coupled proton transport;GO:0045261//proton-transporting ATP synthase complex, catalytic core F(1);GO:0033115//cyanelle thylakoid membrane;GO:0005524//ATP binding;GO:0046933//proton-transporting ATP synthase activity, rotational mechanism
Unigene65556_All	686	ko00190//Oxidative phosphorylation;ko01100//Metabolic pathways	Metabolism	Energy metabolism;Global and overview maps	-5.35633	5.39685e-06	3.03151e-06	K05577//NAD(P)H-quinone oxidoreductase subunit 5 [EC:7.1.1.2]+ko01100//Metabolic pathways+ko00190//Oxidative phosphorylation;K05577//NAD(P)H-quinone oxidoreductase subunit 5 [EC:7.1.1.2]+ko01100//Metabolic pathways+ko00190//Oxidative phosphorylation;K05577//NAD(P)H-quinone oxidoreductase subunit 5 [EC:7.1.1.2]+ko01100//Metabolic pathways+ko00190//Oxidative phosphorylation;K03883//NADH-ubiquinone …	Proton-conducting membrane transporter		unnamed protein product, partial [Chondrus crispus] >CDF32714.1 unnamed protein product, partial [Chondrus crispus]	[C] KOG4668 NADH dehydrogenase subunits 2, 5, and related proteins	NAD(P)H-quinone oxidoreductase subunit 5, chloroplastic OS=Cucumis sativus GN=ndhF PE=3 SV=1	GO:0005743//mitochondrial inner membrane;GO:0016021//integral component of membrane;GO:0042773//ATP synthesis coupled electron transport;GO:0070469//respiratory chain;GO:0008137//NADH dehydrogenase (ubiquinone) activity
Unigene73475_All	755	ko01100//Metabolic pathways;ko00190//Oxidative phosphorylation	Metabolism	Energy metabolism;Global and overview maps	-5.42672	3.07878e-06	1.6839e-06	K03942//NADH dehydrogenase (ubiquinone) flavoprotein 1 [EC:7.1.1.2 1.6.99.3]+ko01100//Metabolic pathways+ko00190//Oxidative phosphorylation;K03942//NADH dehydrogenase (ubiquinone) flavoprotein 1 [EC:7.1.1.2 1.6.99.3]+ko01100//Metabolic pathways+ko00190//Oxidative phosphorylation;K03942//NADH dehydrogenase (ubiquinone) flavoprotein 1 [EC:7.1.1.2 1.6.99.3]+ko01100//Metabolic pathways+ko00190//Oxida…	NADH-ubiquinone oxidoreductase-F iron-sulfur binding region		NADH:ubiquinone oxidoreductase 51 kDa subunit [Volvox carteri f. nagariensis] >EFJ50775.1 NADH:ubiquinone oxidoreductase 51 kDa subunit [Volvox carteri f. nagariensis]	[C] KOG2658 NADH:ubiquinone oxidoreductase, NDUFV1/51kDa subunit	NADH dehydrogenase [ubiquinone] flavoprotein 1, mitochondrial OS=Arabidopsis thaliana GN=At5g08530 PE=1 SV=1	GO:0046872//metal ion binding;GO:0005747//mitochondrial respiratory chain complex I;GO:0010181//FMN binding;GO:0051539//4 iron, 4 sulfur cluster binding;GO:0005743//mitochondrial inner membrane;GO:0051287//NAD binding;GO:0070469//respiratory chain;GO:0008137//NADH dehydrogenase (ubiquinone) activity
Unigene68957_All	729	ko00190//Oxidative phosphorylation;ko01100//Metabolic pathways	Metabolism	Global and overview maps;Energy metabolism	-5.61937	5.802e-07	2.95406e-07	K03883//NADH-ubiquinone oxidoreductase chain 5 [EC:7.1.1.2]+ko01100//Metabolic pathways+ko00190//Oxidative phosphorylation;K03883//NADH-ubiquinone oxidoreductase chain 5 [EC:7.1.1.2]+ko01100//Metabolic pathways+ko00190//Oxidative phosphorylation;K03883//NADH-ubiquinone oxidoreductase chain 5 [EC:7.1.1.2]+ko01100//Metabolic pathways+ko00190//Oxidative phosphorylation;K05577//NAD(P)H-quinone oxidor…	Proton-conducting membrane transporter		NdhF, partial (chloroplast) [Argemone albiflora]	[C] KOG4668 NADH dehydrogenase subunits 2, 5, and related proteins	NAD(P)H-quinone oxidoreductase subunit 5, chloroplastic OS=Ipomoea purpurea GN=ndhF PE=3 SV=1
Unigene17436_All	663	ko00190//Oxidative phosphorylation;ko01100//Metabolic pathways	Metabolism	Energy metabolism;Global and overview maps	-5.73484	1.93371e-07	9.42656e-08	K03937//NADH dehydrogenase (ubiquinone) Fe-S protein 4+ko01100//Metabolic pathways+ko00190//Oxidative phosphorylation;K03937//NADH dehydrogenase (ubiquinone) Fe-S protein 4+ko01100//Metabolic pathways+ko00190//Oxidative phosphorylation;K03937//NADH dehydrogenase (ubiquinone) Fe-S protein 4+ko01100//Metabolic pathways+ko00190//Oxidative phosphorylation;K03937//NADH dehydrogenase (ubiquinone) Fe-S …	ETC complex I subunit conserved region		NADH dehydrogenase (ubiquinone) Fe-S protein 4 [Galdieria sulphuraria] >EME30758.1 NADH dehydrogenase (ubiquinone) Fe-S protein 4 [Galdieria sulphuraria]	[C] KOG3389 NADH:ubiquinone oxidoreductase, NDUFS4/18 kDa subunit	NADH dehydrogenase [ubiquinone] iron-sulfur protein 4, mitochondrial OS=Arabidopsis thaliana GN=FRO1 PE=1 SV=1	GO:0022900//electron transport chain;GO:0016651//oxidoreductase activity, acting on NAD(P)H;GO:0005747//mitochondrial respiratory chain complex I;GO:0006970//response to osmotic stress;GO:0008137//NADH dehydrogenase (ubiquinone) activity;GO:0009631//cold acclimation;GO:0050897//cobalt ion binding
CL10737.Contig1_All	1556	ko01100//Metabolic pathways;ko00190//Oxidative phosphorylation	Metabolism	Energy metabolism;Global and overview maps	-5.86729	8.81392e-15	2.74643e-15	K02256//cytochrome c oxidase subunit 1 [EC:1.9.3.1]+ko01100//Metabolic pathways+ko00190//Oxidative phosphorylation;K02256//cytochrome c oxidase subunit 1 [EC:1.9.3.1]+ko01100//Metabolic pathways+ko00190//Oxidative phosphorylation;K02256//cytochrome c oxidase subunit 1 [EC:1.9.3.1]+ko01100//Metabolic pathways+ko00190//Oxidative phosphorylation;K02256//cytochrome c oxidase subunit 1 [EC:1.9.3.1]+ko…	Cytochrome C and Quinol oxidase polypeptide I	KJ671753.1 Thalassiosira sp. 24 LG-2014 cytochrome oxidase subunit 1 gene, partial cds; mitochondrial	cytochrome c oxidase subunit 1, partial (mitochondrion) (mitochondrion) [Botryococcus braunii Showa]	[C] KOG4769 Cytochrome c oxidase, subunit I	Cytochrome c oxidase subunit 1 OS=Arabidopsis thaliana GN=COX1 PE=3 SV=1	GO:0020037//heme binding;GO:0005506//iron ion binding;GO:0004129//cytochrome-c oxidase activity;GO:0045277//respiratory chain complex IV;GO:0009060//aerobic respiration;GO:0006119//oxidative phosphorylation;GO:0022900//electron transport chain;GO:0005507//copper ion binding;GO:0016021//integral component of membrane;GO:0005743//mitochondrial inner membrane;GO:0005886//plasma membrane
CL9896.Contig1_All	661	ko01100//Metabolic pathways;ko00190//Oxidative phosphorylation	Metabolism	Global and overview maps;Energy metabolism	-5.87285	4.68305e-08	2.16612e-08	K03880//NADH-ubiquinone oxidoreductase chain 3 [EC:7.1.1.2]+ko01100//Metabolic pathways+ko00190//Oxidative phosphorylation;K03880//NADH-ubiquinone oxidoreductase chain 3 [EC:7.1.1.2]+ko01100//Metabolic pathways+ko00190//Oxidative phosphorylation;K03880//NADH-ubiquinone oxidoreductase chain 3 [EC:7.1.1.2]+ko01100//Metabolic pathways+ko00190//Oxidative phosphorylation;K03880//NADH-ubiquinone oxidor…	NADH-ubiquinone/plastoquinone oxidoreductase, chain 3	XM_017574328.1 PREDICTED: Vigna angularis NADH-quinone oxidoreductase subunit B 1-like (LOC108337746), mRNA	RecName: Full=NADH-ubiquinone oxidoreductase chain 3; AltName: Full=NADH dehydrogenase subunit 3 >CAA87750.1 NADH dehydrogenase subunit 3 (mitochondrion) [Tetraselmis subcordiformis]	[C] KOG4662 NADH dehydrogenase subunit 3 and related proteins	NADH-ubiquinone oxidoreductase chain 3 OS=Tetraselmis subcordiformis GN=ND3 PE=3 SV=1	GO:0016021//integral component of membrane;GO:0005739//mitochondrion;GO:0008137//NADH dehydrogenase (ubiquinone) activity
CL10611.Contig1_All	4786	ko00190//Oxidative phosphorylation;ko01100//Metabolic pathways	Metabolism	Energy metabolism;Global and overview maps	-5.97451	4.9832e-201	2.37531e-202	K03883//NADH-ubiquinone oxidoreductase chain 5 [EC:7.1.1.2]+ko01100//Metabolic pathways+ko00190//Oxidative phosphorylation;K05577//NAD(P)H-quinone oxidoreductase subunit 5 [EC:7.1.1.2]+ko01100//Metabolic pathways+ko00190//Oxidative phosphorylation;K05577//NAD(P)H-quinone oxidoreductase subunit 5 [EC:7.1.1.2]+ko01100//Metabolic pathways+ko00190//Oxidative phosphorylation;K03883//NADH-ubiquinone ox…	Uncharacterized protein conserved in bacteria (DUF2309)		NADH dehydrogenase subunit 5 [Thalassiosira pseudonana] >AAZ99393.1 NADH dehydrogenase subunit 5 (mitochondrion) [Thalassiosira pseudonana]	[C] KOG4668 NADH dehydrogenase subunits 2, 5, and related proteins	NAD(P)H-quinone oxidoreductase subunit 5, chloroplastic OS=Nymphaea alba GN=ndhF PE=3 SV=1	GO:0005743//mitochondrial inner membrane;GO:0016021//integral component of membrane;GO:0042773//ATP synthesis coupled electron transport;GO:0070469//respiratory chain;GO:0008137//NADH dehydrogenase (ubiquinone) activity
Unigene25088_All	657	ko01100//Metabolic pathways;ko00190//Oxidative phosphorylation	Metabolism	Energy metabolism;Global and overview maps	-6.12187	2.63066e-09	1.10903e-09	K02256//cytochrome c oxidase subunit 1 [EC:1.9.3.1]+ko01100//Metabolic pathways+ko00190//Oxidative phosphorylation;K02256//cytochrome c oxidase subunit 1 [EC:1.9.3.1]+ko01100//Metabolic pathways+ko00190//Oxidative phosphorylation;K02256//cytochrome c oxidase subunit 1 [EC:1.9.3.1]+ko01100//Metabolic pathways+ko00190//Oxidative phosphorylation;K02256//cytochrome c oxidase subunit 1 [EC:1.9.3.1]+ko…	Cytochrome C and Quinol oxidase polypeptide I		cytochrome c oxidase subunit 1 (mitochondrion) [Sargassum muticum] >AIE46238.1 cytochrome c oxidase subunit 1 (mitochondrion) [Sargassum muticum]	[C] KOG4769 Cytochrome c oxidase, subunit I	Cytochrome c oxidase subunit 1 OS=Phytophthora megasperma GN=COX1 PE=3 SV=1	GO:0020037//heme binding;GO:0005506//iron ion binding;GO:0004129//cytochrome-c oxidase activity;GO:0045277//respiratory chain complex IV;GO:0009060//aerobic respiration;GO:0006119//oxidative phosphorylation;GO:0022900//electron transport chain;GO:0005507//copper ion binding;GO:0016021//integral component of membrane;GO:0005743//mitochondrial inner membrane;GO:0005886//plasma membrane
Unigene28808_All	563	ko01100//Metabolic pathways;ko00190//Oxidative phosphorylation	Metabolism	Energy metabolism;Global and overview maps	-6.20433	9.19448e-10	3.75671e-10	K11352//NADH dehydrogenase (ubiquinone) 1 alpha subcomplex subunit 12+ko01100//Metabolic pathways+ko00190//Oxidative phosphorylation;K11352//NADH dehydrogenase (ubiquinone) 1 alpha subcomplex subunit 12+ko01100//Metabolic pathways+ko00190//Oxidative phosphorylation;K11352//NADH dehydrogenase (ubiquinone) 1 alpha subcomplex subunit 12+ko01100//Metabolic pathways+ko00190//Oxidative phosphorylation;…	NADH ubiquinone oxidoreductase subunit NDUFA12		NADH dehydrogenase (ubiquinone) 1 alpha subcomplex 12 [Klebsormidium nitens]	[C] KOG3382 NADH:ubiquinone oxidoreductase, B17.2 subunit	Probable NADH dehydrogenase [ubiquinone] 1 alpha subcomplex subunit 12 OS=Arabidopsis thaliana GN=At3g03100 PE=1 SV=1	GO:0009055//electron transfer activity;GO:0050897//cobalt ion binding;GO:0006979//response to oxidative stress;GO:0005747//mitochondrial respiratory chain complex I;GO:0005743//mitochondrial inner membrane;GO:0009735//response to cytokinin;GO:0070469//respiratory chain;GO:0008137//NADH dehydrogenase (ubiquinone) activity
Unigene39306_All	1048	ko00190//Oxidative phosphorylation;ko01100//Metabolic pathways	Metabolism	Energy metabolism;Global and overview maps	-6.28233	3.23736e-10	1.28549e-10	K02256//cytochrome c oxidase subunit 1 [EC:1.9.3.1]+ko01100//Metabolic pathways+ko00190//Oxidative phosphorylation;K02256//cytochrome c oxidase subunit 1 [EC:1.9.3.1]+ko01100//Metabolic pathways+ko00190//Oxidative phosphorylation;K02256//cytochrome c oxidase subunit 1 [EC:1.9.3.1]+ko01100//Metabolic pathways+ko00190//Oxidative phosphorylation;K02256//cytochrome c oxidase subunit 1 [EC:1.9.3.1]+ko…	Cytochrome C and Quinol oxidase polypeptide I		cytochrome c oxidase subunit 1 (mitochondrion) [Gloeochaete wittrockiana] >AIM52021.1 cytochrome c oxidase subunit 1 (mitochondrion) [Gloeochaete wittrockiana]	[C] KOG4769 Cytochrome c oxidase, subunit I	Cytochrome c oxidase subunit 1 OS=Cyanidium caldarium GN=COX1 PE=3 SV=1	GO:0020037//heme binding;GO:0005506//iron ion binding;GO:0004129//cytochrome-c oxidase activity;GO:0045277//respiratory chain complex IV;GO:0009060//aerobic respiration;GO:0006119//oxidative phosphorylation;GO:0022900//electron transport chain;GO:0005507//copper ion binding;GO:0016021//integral component of membrane;GO:0005743//mitochondrial inner membrane;GO:0009536//plastid;GO:0070469//respirat…
Unigene72459_All	1701	ko00190//Oxidative phosphorylation;ko01100//Metabolic pathways	Metabolism	Global and overview maps;Energy metabolism	-6.31981	1.32205e-19	3.39681e-20	K03942//NADH dehydrogenase (ubiquinone) flavoprotein 1 [EC:7.1.1.2 1.6.99.3]+ko01100//Metabolic pathways+ko00190//Oxidative phosphorylation;K03942//NADH dehydrogenase (ubiquinone) flavoprotein 1 [EC:7.1.1.2 1.6.99.3]+ko01100//Metabolic pathways+ko00190//Oxidative phosphorylation;K03942//NADH dehydrogenase (ubiquinone) flavoprotein 1 [EC:7.1.1.2 1.6.99.3]+ko01100//Metabolic pathways+ko00190//Oxida…	Respiratory-chain NADH dehydrogenase 51 Kd subunit		hypothetical protein THAPSDRAFT_29850 [Thalassiosira pseudonana CCMP1335] >EED89316.1 hypothetical protein THAPSDRAFT_29850 [Thalassiosira pseudonana CCMP1335]	[C] KOG2658 NADH:ubiquinone oxidoreductase, NDUFV1/51kDa subunit	NADH dehydrogenase [ubiquinone] flavoprotein 1, mitochondrial OS=Arabidopsis thaliana GN=At5g08530 PE=1 SV=1	GO:0046872//metal ion binding;GO:0010181//FMN binding;GO:0051539//4 iron, 4 sulfur cluster binding;GO:0005743//mitochondrial inner membrane;GO:0051287//NAD binding;GO:0070469//respiratory chain;GO:0008137//NADH dehydrogenase (ubiquinone) activity
Unigene72458_All	1939	ko01100//Metabolic pathways;ko00190//Oxidative phosphorylation	Metabolism	Energy metabolism;Global and overview maps	-6.60426	2.27719e-23	5.19415e-24	K03934//NADH dehydrogenase (ubiquinone) Fe-S protein 1 [EC:7.1.1.2 1.6.99.3]+ko01100//Metabolic pathways+ko00190//Oxidative phosphorylation;K03934//NADH dehydrogenase (ubiquinone) Fe-S protein 1 [EC:7.1.1.2 1.6.99.3]+ko01100//Metabolic pathways+ko00190//Oxidative phosphorylation	Molybdopterin oxidoreductase		PREDICTED: putative formate dehydrogenase YrhE, partial [Ricinus communis] >EEF26352.1 formate dehydrogenase, putative, partial [Ricinus communis]	[C] KOG2282 NADH-ubiquinone oxidoreductase, NDUFS1/75 kDa subunit	NADH dehydrogenase [ubiquinone] flavoprotein 1, mitochondrial OS=Arabidopsis thaliana GN=At5g08530 PE=1 SV=1	GO:0015942//formate metabolic process;GO:0009055//electron transfer activity;GO:0042773//ATP synthesis coupled electron transport;GO:0051536//iron-sulfur cluster binding;GO:0006979//response to oxidative stress;GO:0005747//mitochondrial respiratory chain complex I;GO:0008863//formate dehydrogenase (NAD+) activity;GO:0008137//NADH dehydrogenase (ubiquinone) activity;GO:0009507//chloroplast
CL10778.Contig4_All	2136	ko00190//Oxidative phosphorylation;ko01100//Metabolic pathways	Metabolism	Energy metabolism;Global and overview maps	-6.63134	2.86484e-10	1.13325e-10	K02132//F-type H+-transporting ATPase subunit alpha+ko01100//Metabolic pathways+ko00190//Oxidative phosphorylation;K02132//F-type H+-transporting ATPase subunit alpha+ko01100//Metabolic pathways+ko00190//Oxidative phosphorylation;K02132//F-type H+-transporting ATPase subunit alpha+ko01100//Metabolic pathways+ko00190//Oxidative phosphorylation;K02132//F-type H+-transporting ATPase subunit alpha+ko…	ATP synthase alpha/beta family, nucleotide-binding domain	XM_004253314.1 PREDICTED: Solanum lycopersicum ATP synthase subunit alpha (LOC101255871), mRNA	PREDICTED: uncharacterized protein LOC101255871 [Solanum lycopersicum]	[C] KOG1353 F0F1-type ATP synthase, alpha subunit	ATP synthase subunit alpha, mitochondrial OS=Glycine max GN=ATPA PE=3 SV=1	GO:0015986//ATP synthesis coupled proton transport;GO:0045261//proton-transporting ATP synthase complex, catalytic core F(1);GO:0005524//ATP binding;GO:0005739//mitochondrion;GO:0046933//proton-transporting ATP synthase activity, rotational mechanism
Unigene87686_All	987	ko00190//Oxidative phosphorylation;ko01100//Metabolic pathways;ko01200//Carbon metabolism;ko01110//Biosynthesis of secondary metabolites;ko00020//Citrate cycle (TCA cycle)	Metabolism	Carbohydrate metabolism;Energy metabolism;Global and overview maps	-6.64911	1.20467e-12	4.14556e-13	K00235//succinate dehydrogenase (ubiquinone) iron-sulfur subunit [EC:1.3.5.1]+ko00020//Citrate cycle (TCA cycle)+ko01100//Metabolic pathways+ko00190//Oxidative phosphorylation+ko01110//Biosynthesis of secondary metabolites+ko01200//Carbon metabolism;K00235//succinate dehydrogenase (ubiquinone) iron-sulfur subunit [EC:1.3.5.1]+ko00020//Citrate cycle (TCA cycle)+ko01100//Metabolic pathways+ko00190/…	2Fe-2S iron-sulfur cluster binding domain	XM_020232587.1 PREDICTED: Ananas comosus succinate dehydrogenase [ubiquinone] iron-sulfur subunit 1, mitochondrial-like (LOC109710134), mRNA	succinate dehydrogenase iron-sulfur subunit [Saprolegnia parasitica CBS 223.65] >KDO20453.1 succinate dehydrogenase iron-sulfur subunit [Saprolegnia parasitica CBS 223.65]	[C] KOG3049 Succinate dehydrogenase, Fe-S protein subunit	Succinate dehydrogenase [ubiquinone] iron-sulfur subunit 1, mitochondrial OS=Arabidopsis thaliana GN=SDH2-1 PE=1 SV=2	GO:0009055//electron transfer activity;GO:0051537//2 iron, 2 sulfur cluster binding;GO:0006099//tricarboxylic acid cycle;GO:0046872//metal ion binding;GO:0005743//mitochondrial inner membrane;GO:0051539//4 iron, 4 sulfur cluster binding;GO:0008177//succinate dehydrogenase (ubiquinone) activity;GO:0051538//3 iron, 4 sulfur cluster binding
Unigene39268_All	1190	ko00020//Citrate cycle (TCA cycle);ko01200//Carbon metabolism;ko00190//Oxidative phosphorylation;ko01110//Biosynthesis of secondary metabolites;ko01100//Metabolic pathways	Metabolism	Global and overview maps;Energy metabolism;Carbohydrate metabolism	-6.70683	4.45103e-13	1.49983e-13	K00234//succinate dehydrogenase (ubiquinone) flavoprotein subunit [EC:1.3.5.1]+ko00020//Citrate cycle (TCA cycle)+ko01100//Metabolic pathways+ko00190//Oxidative phosphorylation+ko01110//Biosynthesis of secondary metabolites+ko01200//Carbon metabolism;K00234//succinate dehydrogenase (ubiquinone) flavoprotein subunit [EC:1.3.5.1]+ko00020//Citrate cycle (TCA cycle)+ko01100//Metabolic pathways+ko0019…	FAD binding domain		hypothetical protein OsI_32585 [Oryza sativa Indica Group]	[C] KOG2403 Succinate dehydrogenase, flavoprotein subunit	Succinate dehydrogenase [ubiquinone] flavoprotein subunit 1, mitochondrial OS=Arabidopsis thaliana GN=SDH1-1 PE=1 SV=1	GO:0006099//tricarboxylic acid cycle;GO:0022900//electron transport chain;GO:0050660//flavin adenine dinucleotide binding;GO:0005743//mitochondrial inner membrane;GO:0008177//succinate dehydrogenase (ubiquinone) activity
Unigene86005_All	1328	ko00190//Oxidative phosphorylation;ko00020//Citrate cycle (TCA cycle);ko01200//Carbon metabolism;ko01110//Biosynthesis of secondary metabolites;ko01100//Metabolic pathways	Metabolism	Global and overview maps;Energy metabolism;Carbohydrate metabolism	-7.51014	7.92195e-21	1.95402e-21	K00234//succinate dehydrogenase (ubiquinone) flavoprotein subunit [EC:1.3.5.1]+ko00020//Citrate cycle (TCA cycle)+ko01100//Metabolic pathways+ko00190//Oxidative phosphorylation+ko01110//Biosynthesis of secondary metabolites+ko01200//Carbon metabolism;K00234//succinate dehydrogenase (ubiquinone) flavoprotein subunit [EC:1.3.5.1]+ko00020//Citrate cycle (TCA cycle)+ko01100//Metabolic pathways+ko0019…	FAD binding domain	XM_001689790.1 Chlamydomonas reinhardtii succinate dehydrogenase subunit A (SDH1), mRNA	predicted protein [Physcomitrella patens] >EDQ54899.1 predicted protein [Physcomitrella patens]	[C] KOG2403 Succinate dehydrogenase, flavoprotein subunit	Succinate dehydrogenase [ubiquinone] flavoprotein subunit 1, mitochondrial OS=Arabidopsis thaliana GN=SDH1-1 PE=1 SV=1	GO:0009055//electron transfer activity;GO:0006121//mitochondrial electron transport, succinate to ubiquinone;GO:0050660//flavin adenine dinucleotide binding;GO:0006099//tricarboxylic acid cycle;GO:0022900//electron transport chain;GO:0005749//mitochondrial respiratory chain complex II, succinate dehydrogenase complex (ubiquinone);GO:0000104//succinate dehydrogenase activity;GO:0005743//mitochondr…
Unigene33345_All	4279	ko00190//Oxidative phosphorylation;ko01100//Metabolic pathways	Metabolism	Global and overview maps;Energy metabolism	-9.87676	3.49298e-78	3.39318e-79	K03883//NADH-ubiquinone oxidoreductase chain 5 [EC:7.1.1.2]+ko01100//Metabolic pathways+ko00190//Oxidative phosphorylation;K05577//NAD(P)H-quinone oxidoreductase subunit 5 [EC:7.1.1.2]+ko01100//Metabolic pathways+ko00190//Oxidative phosphorylation;K05577//NAD(P)H-quinone oxidoreductase subunit 5 [EC:7.1.1.2]+ko01100//Metabolic pathways+ko00190//Oxidative phosphorylation;K05577//NAD(P)H-quinone ox…	Uncharacterized protein conserved in bacteria (DUF2309)		hypothetical protein AURANDRAFT_70670, partial [Aureococcus anophagefferens] >EGB11868.1 hypothetical protein AURANDRAFT_70670, partial [Aureococcus anophagefferens]	[C] KOG4668 NADH dehydrogenase subunits 2, 5, and related proteins	NADH-ubiquinone oxidoreductase chain 5 OS=Chondrus crispus GN=ND5 PE=3 SV=1	GO:0005743//mitochondrial inner membrane;GO:0016021//integral component of membrane;GO:0042773//ATP synthesis coupled electron transport;GO:0070469//respiratory chain;GO:0008137//NADH dehydrogenase (ubiquinone) activity
