# Supplementary material for: Ocean warming and acidification affect the transitional element and macromolecular accumulation in harmful raphidophyte Heterosigma akashiwo
Source: Research Square preprint supplement (doi:10.21203/rs.3.rs-2173912/v1), 2022-11-03
Supplement: Supplementary file 5 [file 9682ab671dab7112b2e1df13.xlsx]

## Sheet: DEGs_overall
Supplementary Table 1:	Overall differentially expressed genes identified in this study
Gene ID	Length	log2(He_1000/He_400)	Pvalue(He_400-vs-He_1000)	Qvalue(He_400-vs-He_1000)	Kegg Orthology	Nr	Kog	Pfam	Swissprot	TFs	Nt	GO
CL4455.Contig2_All	2213	-12.7761	0	0		hypothetical protein FisN_28Hh061 [Fistulifera solaris]		Aromatic amino acid lyase
CL810.Contig7_All	2133	-12.0051	1.66478e-240	3.98142e-239	K22378//E3 ubiquitin-protein ligase RNF181 [EC:2.3.2.27];K11982//E3 ubiquitin-protein ligase RNF115/126 [EC:2.3.2.27];K11982//E3 ubiquitin-protein ligase RNF115/126 [EC:2.3.2.27];K11982//E3 ubiquitin-protein ligase RNF115/126 [EC:2.3.2.27];K11982//E3 ubiquitin-protein ligase RNF115/126 [EC:2.3.2.27]	hypothetical protein EMIHUDRAFT_250761 [Emiliania huxleyi CCMP1516] >XP_005776347.1 hypothetical protein EMIHUDRAFT_206896 [Emiliania huxleyi CCMP1516] >EOD03974.1 hypothetical protein EMIHUDRAFT_250761 [Emiliania huxleyi CCMP1516] >EOD23918.1 hypothetical protein EMIHUDRAFT_206896 [Emiliania huxleyi CCMP1516]	[O] KOG0800 FOG: Predicted E3 ubiquitin ligase		Probable E3 ubiquitin-protein ligase RHC2A OS=Arabidopsis thaliana GN=RHC2A PE=2 SV=1			GO:0016021//integral component of membrane
CL3342.Contig1_All	1680	-11.9105	3.36188e-229	7.77825e-228	K20416//palmitoyl-[glycerolipid] 7-desaturase [EC:1.14.19.42];K20416//palmitoyl-[glycerolipid] 7-desaturase [EC:1.14.19.42];K20416//palmitoyl-[glycerolipid] 7-desaturase [EC:1.14.19.42];K20416//palmitoyl-[glycerolipid] 7-desaturase [EC:1.14.19.42];K20416//palmitoyl-[glycerolipid] 7-desaturase [EC:1.14.19.42]	predicted protein [Thalassiosira pseudonana CCMP1335] >EED96172.1 predicted protein [Thalassiosira pseudonana CCMP1335]	[I] KOG1600 Fatty acid desaturase		Delta-9 acyl-lipid desaturase 2 OS=Arabidopsis thaliana GN=ADS2 PE=2 SV=2			GO:0016021//integral component of membrane;GO:0006633//fatty acid biosynthetic process;GO:0006629//lipid metabolic process;GO:0016717//oxidoreductase activity, acting on paired donors, with oxidation of a pair of donors resulting in the reduction of molecular oxygen to two molecules of water
CL531.Contig5_All	1918	-11.5763	0	0	K07243//high-affinity iron transporter;K07243//high-affinity iron transporter;K07243//high-affinity iron transporter;K07243//high-affinity iron transporter	hypothetical protein CHLNCDRAFT_139414 [Chlorella variabilis] >EFN52192.1 hypothetical protein CHLNCDRAFT_139414 [Chlorella variabilis]		Iron permease FTR1 family				GO:0033573//high-affinity iron permease complex;GO:0005381//iron ion transmembrane transporter activity
Unigene47921_All	2913	-11.2704	5.52697e-165	9.78299e-164	K01738//cysteine synthase [EC:2.5.1.47]+ko00920//Sulfur metabolism+ko01230//Biosynthesis of amino acids+ko01100//Metabolic pathways+ko01110//Biosynthesis of secondary metabolites+ko00270//Cysteine and methionine metabolism+ko01200//Carbon metabolism;K01738//cysteine synthase [EC:2.5.1.47]+ko00920//Sulfur metabolism+ko01230//Biosynthesis of amino acids+ko01100//Metabolic pathways+ko01110//Biosynth…	Tryptophan synthase beta subunit-like PLP-dependent enzymes superfamily [Ostreococcus tauri]	[E] KOG1252 Cystathionine beta-synthase and related enzymes	KDPG and KHG aldolase	Cysteine synthase OS=Citrullus lanatus PE=1 SV=1			GO:0006535//cysteine biosynthetic process from serine;GO:0004124//cysteine synthase activity
Unigene20240_All	1552	-10.9295	0	0
CL5066.Contig2_All	895	-10.5305	4.22436e-112	5.59355e-111
CL9204.Contig2_All	3115	-10.1437	2.46877e-91	2.81405e-90	K01687//dihydroxy-acid dehydratase [EC:4.2.1.9]+ko00290//Valine, leucine and isoleucine biosynthesis+ko00770//Pantothenate and CoA biosynthesis+ko01230//Biosynthesis of amino acids+ko01100//Metabolic pathways+ko01110//Biosynthesis of secondary metabolites+ko01210//2-Oxocarboxylic acid metabolism;K01687//dihydroxy-acid dehydratase [EC:4.2.1.9]+ko00290//Valine, leucine and isoleucine biosynthesis+k…	dihydroxy-acid dehydratase, mitochondrial-like [Dorcoceras hygrometricum]	[E] KOG0628 Aromatic-L-amino-acid/L-histidine decarboxylase	Dehydratase family	Tyrosine decarboxylase 1 OS=Arabidopsis thaliana GN=ELI5 PE=2 SV=1			GO:0004160//dihydroxy-acid dehydratase activity;GO:0009536//plastid;GO:0009082//branched-chain amino acid biosynthetic process
CL1121.Contig2_All	1646	-10.0709	7.35255e-88	8.14737e-87	K01897//long-chain acyl-CoA synthetase [EC:6.2.1.3]+ko04146//Peroxisome+ko01100//Metabolic pathways+ko00061//Fatty acid biosynthesis+ko01212//Fatty acid metabolism+ko00071//Fatty acid degradation;K01897//long-chain acyl-CoA synthetase [EC:6.2.1.3]+ko04146//Peroxisome+ko01100//Metabolic pathways+ko00061//Fatty acid biosynthesis+ko01212//Fatty acid metabolism+ko00071//Fatty acid degradation;K01897/…	long chain acyl-coA synthetase [Ectocarpus siliculosus]	[I] KOG1256 Long-chain acyl-CoA synthetases (AMP-forming)	AMP-binding enzyme	Long chain acyl-CoA synthetase 7, peroxisomal OS=Arabidopsis thaliana GN=LACS7 PE=1 SV=2		XM_009832301.1 Aphanomyces astaci hypothetical protein mRNA
Unigene43086_All	1525	-10.0002	1.32628e-84	1.4323e-83	K21737//acyl-lipid Delta6-acetylenase / acyl-lipid (9-3)-desaturase [EC:1.14.19.38 1.14.19.47];K21737//acyl-lipid Delta6-acetylenase / acyl-lipid (9-3)-desaturase [EC:1.14.19.38 1.14.19.47];K21737//acyl-lipid Delta6-acetylenase / acyl-lipid (9-3)-desaturase [EC:1.14.19.38 1.14.19.47];K21737//acyl-lipid Delta6-acetylenase / acyl-lipid (9-3)-desaturase [EC:1.14.19.38 1.14.19.47];K21737//acyl-lipid …	delta-6 fatty acid desaturase [Ectocarpus siliculosus]	[I] KOG4232 Delta 6-fatty acid desaturase/delta-8 sphingolipid desaturase	Fatty acid desaturase	Acyl-lipid (9-3)-desaturase OS=Ceratodon purpureus PE=1 SV=1		XM_012346380.1 Saprolegnia parasitica CBS 223.65 hypothetical protein mRNA
CL7808.Contig5_All	1594	-9.96118	7.393e-83	7.86781e-82	K08907//light-harvesting complex I chlorophyll a/b binding protein 1+ko00196//Photosynthesis - antenna proteins;K08907//light-harvesting complex I chlorophyll a/b binding protein 1+ko00196//Photosynthesis - antenna proteins;K08907//light-harvesting complex I chlorophyll a/b binding protein 1+ko00196//Photosynthesis - antenna proteins;K08911//light-harvesting complex I chlorophyll a/b binding prot…	hypothetical protein THAOC_09862 [Thalassiosira oceanica]	[C] LSE0391 A Chlorophyll A/B binding protein	Chlorophyll A-B binding protein	Light-harvesting complex I LH38 proteins (Fragment) OS=Euglena gracilis PE=2 SV=1			GO:0009765//photosynthesis, light harvesting;GO:0009535//chloroplast thylakoid membrane;GO:0016021//integral component of membrane;GO:0016168//chlorophyll binding;GO:0018298//protein-chromophore linkage
Unigene17483_All	781	-9.95625	1.22179e-82	1.29804e-81	K13171//serine/arginine repetitive matrix protein 1+ko03015//mRNA surveillance pathway+ko03013//RNA transport;K14325//RNA-binding protein with serine-rich domain 1+ko03015//mRNA surveillance pathway+ko03013//RNA transport	Regulatory factor, effector, bacterial [Nannochloropsis gaditana]	[AR] KOG2146 Splicing coactivator SRm160/300, subunit SRm160 (contains PWI domain)	SOUL heme-binding protein
CL9260.Contig7_All	1287	-9.92379	3.23601e-81	3.39731e-80	K14325//RNA-binding protein with serine-rich domain 1+ko03015//mRNA surveillance pathway+ko03013//RNA transport;K04733//interleukin-1 receptor-associated kinase 4 [EC:2.7.11.1];K14325//RNA-binding protein with serine-rich domain 1+ko03015//mRNA surveillance pathway+ko03013//RNA transport;K00430//peroxidase [EC:1.11.1.7]+ko01100//Metabolic pathways+ko01110//Biosynthesis of secondary metabolites+ko…	hypothetical protein BU14_0262s0002, partial [Porphyra umbilicalis]	[T] KOG0507 CASK-interacting adaptor protein (caskin) and related proteins with ankyrin repeats and SAM domain	Kinase associated domain 1	Proline-rich receptor-like protein kinase PERK1 OS=Arabidopsis thaliana GN=PERK1 PE=2 SV=1
CL257.Contig1_All	6187	-9.90431	2.25319e-80	2.34864e-79				FAR1 DNA-binding domain
Unigene33345_All	4279	-9.87676	3.39318e-79	3.49298e-78	K03883//NADH-ubiquinone oxidoreductase chain 5 [EC:7.1.1.2]+ko01100//Metabolic pathways+ko00190//Oxidative phosphorylation;K05577//NAD(P)H-quinone oxidoreductase subunit 5 [EC:7.1.1.2]+ko01100//Metabolic pathways+ko00190//Oxidative phosphorylation;K05577//NAD(P)H-quinone oxidoreductase subunit 5 [EC:7.1.1.2]+ko01100//Metabolic pathways+ko00190//Oxidative phosphorylation;K05577//NAD(P)H-quinone ox…	hypothetical protein AURANDRAFT_70670, partial [Aureococcus anophagefferens] >EGB11868.1 hypothetical protein AURANDRAFT_70670, partial [Aureococcus anophagefferens]	[C] KOG4668 NADH dehydrogenase subunits 2, 5, and related proteins	Uncharacterized protein conserved in bacteria (DUF2309)	NADH-ubiquinone oxidoreductase chain 5 OS=Chondrus crispus GN=ND5 PE=3 SV=1			GO:0005743//mitochondrial inner membrane;GO:0016021//integral component of membrane;GO:0042773//ATP synthesis coupled electron transport;GO:0070469//respiratory chain;GO:0008137//NADH dehydrogenase (ubiquinone) activity
CL11061.Contig1_All	2629	-9.83407	2.10257e-77	2.12093e-76	K09667//protein O-GlcNAc transferase [EC:2.4.1.255]+ko00514//Other types of O-glycan biosynthesis;K09667//protein O-GlcNAc transferase [EC:2.4.1.255]+ko00514//Other types of O-glycan biosynthesis;K09667//protein O-GlcNAc transferase [EC:2.4.1.255]+ko00514//Other types of O-glycan biosynthesis;K09667//protein O-GlcNAc transferase [EC:2.4.1.255]+ko00514//Other types of O-glycan biosynthesis;K09667/…	UDP-N-acetylglucosamine-peptide N-acetylglucosaminyltransferase, putative [Phytophthora infestans T30-4] >EEY67702.1 UDP-N-acetylglucosamine-peptide N-acetylglucosaminyltransferase, putative [Phytophthora infestans T30-4]	[GOT] KOG4626 O-linked N-acetylglucosamine transferase OGT	TPR repeat	Probable UDP-N-acetylglucosamine--peptide N-acetylglucosaminyltransferase SPINDLY OS=Arabidopsis thaliana GN=SPY PE=1 SV=1			GO:0016757//transferase activity, transferring glycosyl groups;GO:0042802//identical protein binding;GO:0016740//transferase activity
Unigene58762_All	4081	-9.74521	8.53213e-74	8.30994e-73	K00666//fatty-acyl-CoA synthase [EC:6.2.1.-];K01904//4-coumarate--CoA ligase [EC:6.2.1.12]+ko00130//Ubiquinone and other terpenoid-quinone biosynthesis+ko01100//Metabolic pathways+ko01110//Biosynthesis of secondary metabolites+ko00940//Phenylpropanoid biosynthesis+ko00360//Phenylalanine metabolism;K01904//4-coumarate--CoA ligase [EC:6.2.1.12]+ko00130//Ubiquinone and other terpenoid-quinone biosyn…	predicted protein [Chlamydomonas reinhardtii] >EDO97965.1 predicted protein [Chlamydomonas reinhardtii]	[I] KOG1406 Peroxisomal 3-ketoacyl-CoA-thiolase P-44/SCP2	AMP-binding enzyme	Butyrate--CoA ligase AAE11, peroxisomal OS=Arabidopsis thaliana GN=AAE11 PE=1 SV=1			GO:0003858//3-hydroxybutyrate dehydrogenase activity;GO:0008152//metabolic process;GO:0004467//long-chain fatty acid-CoA ligase activity;GO:0102391//decanoate--CoA ligase activity;GO:0016874//ligase activity
Unigene27748_All	1334	-9.73137	3.00862e-73	2.91315e-72		FAD-dependent pyridine nucleotide-disulfide oxidoreductase, partial [Medicago truncatula] >KEH15495.1 FAD-dependent pyridine nucleotide-disulfide oxidoreductase, partial [Medicago truncatula]		Cytochrome bd terminal oxidase subunit I				GO:0009055//electron transfer activity;GO:0019646//aerobic electron transport chain;GO:0046294//formaldehyde catabolic process;GO:0070069//cytochrome complex;GO:0016021//integral component of membrane;GO:0018738//S-formylglutathione hydrolase activity;GO:0016491//oxidoreductase activity
Unigene40375_All	1304	-9.7244	5.65639e-73	5.46413e-72	K04712//sphingolipid 4-desaturase/C4-monooxygenase [EC:1.14.19.17 1.14.18.5]+ko00600//Sphingolipid metabolism+ko01100//Metabolic pathways;K04712//sphingolipid 4-desaturase/C4-monooxygenase [EC:1.14.19.17 1.14.18.5]+ko00600//Sphingolipid metabolism+ko01100//Metabolic pathways;K04712//sphingolipid 4-desaturase/C4-monooxygenase [EC:1.14.19.17 1.14.18.5]+ko00600//Sphingolipid metabolism+ko01100//Meta…	sphingolipid Delta-4 desaturase [Fistulifera solaris]	[I] KOG2987 Fatty acid desaturase	Fatty acid desaturase	Sphingolipid delta(4)-desaturase DES1-like OS=Oryza sativa subsp. japonica GN=Os02g0639600 PE=2 SV=1			GO:0042284//sphingolipid delta-4 desaturase activity;GO:0030148//sphingolipid biosynthetic process;GO:0016021//integral component of membrane;GO:0046513//ceramide biosynthetic process
CL8212.Contig2_All	1900	-9.66376	1.25081e-70	1.18167e-69	K13172//serine/arginine repetitive matrix protein 2;K09566//peptidyl-prolyl isomerase G (cyclophilin G) [EC:5.2.1.8];K13171//serine/arginine repetitive matrix protein 1+ko03015//mRNA surveillance pathway+ko03013//RNA transport;K13171//serine/arginine repetitive matrix protein 1+ko03015//mRNA surveillance pathway+ko03013//RNA transport;K13171//serine/arginine repetitive matrix protein 1+ko03015//m…	hypothetical protein COLO4_01399 [Corchorus olitorius]	[GO] KOG4157 beta-1,6-N-acetylglucosaminyltransferase, contains WSC domain	Methane/Phenol/Toluene Hydroxylase
Unigene21378_All	1861	-9.65646	2.36994e-70	2.22961e-69	K13171//serine/arginine repetitive matrix protein 1+ko03015//mRNA surveillance pathway+ko03013//RNA transport;K13171//serine/arginine repetitive matrix protein 1+ko03015//mRNA surveillance pathway+ko03013//RNA transport;K13171//serine/arginine repetitive matrix protein 1+ko03015//mRNA surveillance pathway+ko03013//RNA transport;K13171//serine/arginine repetitive matrix protein 1+ko03015//mRNA sur…	hypothetical protein AURANDRAFT_72421, partial [Aureococcus anophagefferens] >EGB04866.1 hypothetical protein AURANDRAFT_72421, partial [Aureococcus anophagefferens]	[K] LSE0096 H SON DNA-binding protein/negative regulatory element-binding protein	Tripartite tricarboxylate transporter TctA family
Unigene6106_All	3272	-9.65253	3.33714e-70	3.13538e-69		hypothetical protein Naga_100666g1 [Nannochloropsis gaditana]		Arylsulfotransferase (ASST)				GO:0008152//metabolic process;GO:0008484//sulfuric ester hydrolase activity;GO:0016021//integral component of membrane
Unigene24359_All	3007	-9.54616	2.76306e-66	2.48698e-65	K05396//D-cysteine desulfhydrase [EC:4.4.1.15]+ko00270//Cysteine and methionine metabolism;K05396//D-cysteine desulfhydrase [EC:4.4.1.15]+ko00270//Cysteine and methionine metabolism	predicted protein [Ostreococcus lucimarinus CCE9901] >ABP00579.1 predicted protein [Ostreococcus lucimarinus CCE9901]		DegT/DnrJ/EryC1/StrS aminotransferase family	Bifunctional D-cysteine desulfhydrase/1-aminocyclopropane-1-carboxylate deaminase, mitochondrial OS=Arabidopsis thaliana GN=DCD PE=1 SV=1			GO:0003824//catalytic activity
CL1121.Contig4_All	3513	-9.53465	7.12121e-66	6.38195e-65	K01897//long-chain acyl-CoA synthetase [EC:6.2.1.3]+ko04146//Peroxisome+ko01100//Metabolic pathways+ko00061//Fatty acid biosynthesis+ko01212//Fatty acid metabolism+ko00071//Fatty acid degradation;K01897//long-chain acyl-CoA synthetase [EC:6.2.1.3]+ko04146//Peroxisome+ko01100//Metabolic pathways+ko00061//Fatty acid biosynthesis+ko01212//Fatty acid metabolism+ko00071//Fatty acid degradation;K01897/…	long chain acyl-coA synthetase [Ectocarpus siliculosus]	[I] KOG1180 Acyl-CoA synthetase	AMP-binding enzyme	Long chain acyl-CoA synthetase 8 OS=Arabidopsis thaliana GN=LACS8 PE=1 SV=1			GO:0004467//long-chain fatty acid-CoA ligase activity;GO:0102391//decanoate--CoA ligase activity
Unigene31657_All	1816	-9.52425	4.23023e-129	6.17164e-128	K13171//serine/arginine repetitive matrix protein 1+ko03015//mRNA surveillance pathway+ko03013//RNA transport;K13171//serine/arginine repetitive matrix protein 1+ko03015//mRNA surveillance pathway+ko03013//RNA transport;K13171//serine/arginine repetitive matrix protein 1+ko03015//mRNA surveillance pathway+ko03013//RNA transport;K01213//galacturan 1,4-alpha-galacturonidase [EC:3.2.1.67]+ko00040//P…	Quinohemoprotein ethanol dehydrogenase, putative, partial [Ricinus communis]	[K] LSE0096 H SON DNA-binding protein/negative regulatory element-binding protein	PQQ enzyme repeat	Nuclear pore complex protein NUP62 OS=Arabidopsis thaliana GN=NUP62 PE=1 SV=1
CL4286.Contig2_All	1718	-9.52011	2.33567e-65	2.0827e-64	K16914//bifunctional lysine-specific demethylase and histidyl-hydroxylase NO66 [EC:1.14.11.- 1.14.11.27];K16914//bifunctional lysine-specific demethylase and histidyl-hydroxylase NO66 [EC:1.14.11.- 1.14.11.27]	cupin 4 family protein, partial [Chrysochromulina sp. CCMP291]	[S] KOG3706 Uncharacterized conserved protein	Cupin superfamily protein
CL10753.Contig6_All	1080	-9.4054	2.02628e-61	1.71866e-60	K22883//L-ornithine N5-acetyltransferase [EC:2.3.1.-];K22883//L-ornithine N5-acetyltransferase [EC:2.3.1.-];K22883//L-ornithine N5-acetyltransferase [EC:2.3.1.-];K22883//L-ornithine N5-acetyltransferase [EC:2.3.1.-];K10799//tankyrase [EC:2.4.2.30]	hypothetical protein BU14_0736s0005 [Porphyra umbilicalis]	[ZR] LSE0118 A Protein possibly involved in cytoskeleton rearrangements, contains FH domain	Sec23/Sec24 trunk domain	Lysine-rich arabinogalactan protein 19 OS=Arabidopsis thaliana GN=AGP19 PE=2 SV=2			GO:0004674//protein serine/threonine kinase activity;GO:0005524//ATP binding;GO:0016021//integral component of membrane
Unigene85852_All	4388	-9.38313	1.10761e-60	9.31514e-60	K22020//mucin-19;K10956//protein transport protein SEC61 subunit alpha+ko04145//Phagosome+ko04141//Protein processing in endoplasmic reticulum+ko03060//Protein export;K14306//nuclear pore complex protein Nup62+ko03013//RNA transport	protocadherin Fat-like protein [Phytophthora infestans T30-4] >EEY56445.1 protocadherin Fat-like protein [Phytophthora infestans T30-4]	[AR] KOG2146 Splicing coactivator SRm160/300, subunit SRm160 (contains PWI domain)	IPT/TIG domain	Protein TIC 214 OS=Cucumis sativus GN=TIC214 PE=3 SV=2	TIG		GO:0007156//homophilic cell adhesion via plasma membrane adhesion molecules;GO:0005509//calcium ion binding;GO:0016021//integral component of membrane
CL8212.Contig1_All	6510	-9.31153	7.53563e-115	1.01842e-113	K22020//mucin-19;K04733//interleukin-1 receptor-associated kinase 4 [EC:2.7.11.1];K14306//nuclear pore complex protein Nup62+ko03013//RNA transport;K14306//nuclear pore complex protein Nup62+ko03013//RNA transport;K14306//nuclear pore complex protein Nup62+ko03013//RNA transport	hypothetical protein COLO4_01399 [Corchorus olitorius]	[GO] KOG4157 beta-1,6-N-acetylglucosaminyltransferase, contains WSC domain	Methane/Phenol/Toluene Hydroxylase	Ferredoxin OS=Marchantia polymorpha PE=1 SV=1			GO:0016539//intein-mediated protein splicing;GO:0008233//peptidase activity;GO:0016021//integral component of membrane
Unigene13205_All	1685	-9.19876	6.87366e-55	5.39398e-54	K02184//formin 2;K02184//formin 2;K02184//formin 2;K02184//formin 2;K02184//formin 2	formin-like protein 20 isoform X3 [Spinacia oleracea]	[ZR] LSE0118 A Protein possibly involved in cytoskeleton rearrangements, contains FH domain	Domain of unknown function (DUF1995)	Formin-like protein 16 OS=Oryza sativa subsp. japonica GN=FH16 PE=2 SV=1
Unigene24367_All	1239	-9.18922	2.43336e-107	3.11504e-106	K16290//xylem cysteine proteinase [EC:3.4.22.-];K16290//xylem cysteine proteinase [EC:3.4.22.-];K16290//xylem cysteine proteinase [EC:3.4.22.-];K16290//xylem cysteine proteinase [EC:3.4.22.-];K16290//xylem cysteine proteinase [EC:3.4.22.-]	cysteine proteinase [Oxyrrhis marina]	[O] KOG1543 Cysteine proteinase Cathepsin L	Papain family cysteine protease	Cysteine protease XCP1 OS=Arabidopsis thaliana GN=XCP1 PE=1 SV=1		XM_009039553.1 Aureococcus anophagefferens hypothetical protein partial mRNA	GO:0032440//2-alkenal reductase [NAD(P)] activity;GO:0008234//cysteine-type peptidase activity
CL1546.Contig2_All	1561	-9.10485	3.81303e-52	2.88915e-51
Unigene86858_All	1942	-9.10049	5.07297e-52	3.83563e-51	K20660//cytochrome P450 family 709;K20660//cytochrome P450 family 709;K20660//cytochrome P450 family 709;K20660//cytochrome P450 family 709;K20660//cytochrome P450 family 709	hypothetical protein AURANDRAFT_71291, partial [Aureococcus anophagefferens] >EGB09872.1 hypothetical protein AURANDRAFT_71291, partial [Aureococcus anophagefferens]	[WV] KOG1216 von Willebrand factor and related coagulation proteins	Cytochrome P450	Cytochrome P450 734A6 OS=Oryza sativa subsp. japonica GN=CYP734A6 PE=2 SV=1			GO:0016705//oxidoreductase activity, acting on paired donors, with incorporation or reduction of molecular oxygen;GO:0020037//heme binding;GO:0005506//iron ion binding;GO:0004497//monooxygenase activity
CL572.Contig4_All	903	-9.09532	7.11765e-52	5.37179e-51	K04097//prostaglandin-H2 D-isomerase / glutathione transferase [EC:5.3.99.2 2.5.1.18]+ko00590//Arachidonic acid metabolism+ko01100//Metabolic pathways+ko00480//Glutathione metabolism;K04097//prostaglandin-H2 D-isomerase / glutathione transferase [EC:5.3.99.2 2.5.1.18]+ko00590//Arachidonic acid metabolism+ko01100//Metabolic pathways+ko00480//Glutathione metabolism	glutathione S-transferase [Achlya hypogyna]	[O] KOG1695 Glutathione S-transferase	Glutathione S-transferase, N-terminal domain
CL794.Contig1_All	1019	-9.0924	8.61239e-52	6.48905e-51	K08907//light-harvesting complex I chlorophyll a/b binding protein 1+ko00196//Photosynthesis - antenna proteins;K08907//light-harvesting complex I chlorophyll a/b binding protein 1+ko00196//Photosynthesis - antenna proteins;K08907//light-harvesting complex I chlorophyll a/b binding protein 1+ko00196//Photosynthesis - antenna proteins;K08907//light-harvesting complex I chlorophyll a/b binding prot…	protein fucoxanthin chlorophyll a/c protein, partial [Phaeodactylum tricornutum CCAP 1055/1] >EEC45497.1 protein fucoxanthin chlorophyll a/c protein, partial [Phaeodactylum tricornutum CCAP 1055/1]	[C] LSE0391 A Chlorophyll A/B binding protein	Chlorophyll A-B binding protein	Chlorophyll a-b binding protein CP26, chloroplastic OS=Arabidopsis thaliana GN=LHCB5 PE=1 SV=1			GO:0009765//photosynthesis, light harvesting;GO:0009535//chloroplast thylakoid membrane;GO:0016021//integral component of membrane;GO:0016168//chlorophyll binding;GO:0018298//protein-chromophore linkage
Unigene32040_All	340	-9.08969	1.02758e-51	7.73298e-51
CL9767.Contig7_All	2179	-9.08425	1.46321e-51	1.10013e-50	K06875//programmed cell death protein 5;K06875//programmed cell death protein 5;K06875//programmed cell death protein 5;K06875//programmed cell death protein 5	hypothetical protein THRCLA_21535 [Thraustotheca clavata]	[PQ] KOG0039 Ferric reductase, NADH/NADPH oxidase and related proteins	Double-stranded DNA-binding domain	Calcineurin B-like protein 4 OS=Oryza sativa subsp. japonica GN=CBL4 PE=1 SV=1			GO:0046872//metal ion binding;GO:0000049//tRNA binding
CL531.Contig2_All	1723	-8.95849	0	0	K07243//high-affinity iron transporter;K07243//high-affinity iron transporter;K07243//high-affinity iron transporter;K07243//high-affinity iron transporter	Plasma membrane iron permease [Auxenochlorella protothecoides] >KFM26769.1 Plasma membrane iron permease [Auxenochlorella protothecoides]		Iron permease FTR1 family				GO:0033573//high-affinity iron permease complex;GO:0005381//iron ion transmembrane transporter activity
Unigene24228_All	4349	-8.89859	2.62689e-91	2.9936e-90	K00030//isocitrate dehydrogenase (NAD+) [EC:1.1.1.41]+ko00020//Citrate cycle (TCA cycle)+ko01230//Biosynthesis of amino acids+ko01100//Metabolic pathways+ko01110//Biosynthesis of secondary metabolites+ko01210//2-Oxocarboxylic acid metabolism+ko01200//Carbon metabolism;K00030//isocitrate dehydrogenase (NAD+) [EC:1.1.1.41]+ko00020//Citrate cycle (TCA cycle)+ko01230//Biosynthesis of amino acids+ko01…	isocitrate dehydrogenase subunit 2, mitochondrial precursor [Cyanidioschyzon merolae strain 10D] >BAM82866.1 isocitrate dehydrogenase subunit 2, mitochondrial precursor [Cyanidioschyzon merolae strain 10D]	[E] KOG0785 Isocitrate dehydrogenase, alpha subunit	Tripartite tricarboxylate transporter TctA family	3-isopropylmalate dehydrogenase, chloroplastic OS=Solanum tuberosum PE=2 SV=1			GO:0006099//tricarboxylic acid cycle;GO:0004449//isocitrate dehydrogenase (NAD+) activity
Unigene33020_All	1550	-8.86729	8.92935e-46	6.162e-45	K00507//stearoyl-CoA desaturase (Delta-9 desaturase) [EC:1.14.19.1]+ko01212//Fatty acid metabolism+ko01040//Biosynthesis of unsaturated fatty acids;K00507//stearoyl-CoA desaturase (Delta-9 desaturase) [EC:1.14.19.1]+ko01212//Fatty acid metabolism+ko01040//Biosynthesis of unsaturated fatty acids;K00507//stearoyl-CoA desaturase (Delta-9 desaturase) [EC:1.14.19.1]+ko01212//Fatty acid metabolism+ko01…	predicted protein [Hordeum vulgare subsp. vulgare]	[I] KOG1600 Fatty acid desaturase	Fatty acid desaturase	Palmitoyl-monogalactosyldiacylglycerol delta-7 desaturase, chloroplastic OS=Arabidopsis thaliana GN=ADS3 PE=1 SV=2		AK107670.1 Oryza sativa Japonica Group cDNA clone:002-131-H08, full insert sequence	GO:0046872//metal ion binding;GO:0020037//heme binding;GO:0006636//unsaturated fatty acid biosynthetic process;GO:0016021//integral component of membrane;GO:0004768//stearoyl-CoA 9-desaturase activity;GO:0006629//lipid metabolic process;GO:0016717//oxidoreductase activity, acting on paired donors, with oxidation of a pair of donors resulting in the reduction of molecular oxygen to two molecules o…
CL794.Contig9_All	1368	-8.82348	1.10011e-44	7.47956e-44	K08907//light-harvesting complex I chlorophyll a/b binding protein 1+ko00196//Photosynthesis - antenna proteins;K08907//light-harvesting complex I chlorophyll a/b binding protein 1+ko00196//Photosynthesis - antenna proteins;K08907//light-harvesting complex I chlorophyll a/b binding protein 1+ko00196//Photosynthesis - antenna proteins;K08907//light-harvesting complex I chlorophyll a/b binding prot…	protein fucoxanthin chlorophyll a/c protein, partial [Phaeodactylum tricornutum CCAP 1055/1] >EEC45497.1 protein fucoxanthin chlorophyll a/c protein, partial [Phaeodactylum tricornutum CCAP 1055/1]	[C] LSE0391 A Chlorophyll A/B binding protein	Chlorophyll A-B binding protein	Chlorophyll a-b binding protein CP26, chloroplastic OS=Arabidopsis thaliana GN=LHCB5 PE=1 SV=1			GO:0009765//photosynthesis, light harvesting;GO:0009535//chloroplast thylakoid membrane;GO:0016021//integral component of membrane;GO:0016168//chlorophyll binding;GO:0018298//protein-chromophore linkage
CL8815.Contig1_All	1154	-8.78929	7.50292e-44	5.02424e-43	K01673//carbonic anhydrase [EC:4.2.1.1]+ko00910//Nitrogen metabolism;K01673//carbonic anhydrase [EC:4.2.1.1]+ko00910//Nitrogen metabolism;K01673//carbonic anhydrase [EC:4.2.1.1]+ko00910//Nitrogen metabolism;K01673//carbonic anhydrase [EC:4.2.1.1]+ko00910//Nitrogen metabolism;K01673//carbonic anhydrase [EC:4.2.1.1]+ko00910//Nitrogen metabolism	hypothetical protein PPTG_08089 [Phytophthora parasitica INRA-310] >ETI52949.1 hypothetical protein F443_04045 [Phytophthora parasitica P1569] >ETL99359.1 hypothetical protein L917_03785 [Phytophthora parasitica] >ETM52517.1 hypothetical protein L914_03889 [Phytophthora parasitica] >ETN13175.1 hypothetical protein PPTG_08089 [Phytophthora parasitica INRA-310] >ETO81662.1 hypothetical protein F444…	[P] KOG1578 Predicted carbonic anhydrase involved in protection against oxidative damage	Carbonic anhydrase	Beta carbonic anhydrase 1, chloroplastic OS=Arabidopsis thaliana GN=BCA1 PE=1 SV=2			GO:0015976//carbon utilization;GO:0008270//zinc ion binding;GO:0004089//carbonate dehydratase activity
CL77.Contig5_All	2082	-8.78152	1.15507e-43	7.70776e-43	K00430//peroxidase [EC:1.11.1.7]+ko01100//Metabolic pathways+ko01110//Biosynthesis of secondary metabolites+ko00940//Phenylpropanoid biosynthesis;K04733//interleukin-1 receptor-associated kinase 4 [EC:2.7.11.1];K04733//interleukin-1 receptor-associated kinase 4 [EC:2.7.11.1];K00430//peroxidase [EC:1.11.1.7]+ko01100//Metabolic pathways+ko01110//Biosynthesis of secondary metabolites+ko00940//Phenyl…	hypothetical protein Naga_101468g1, partial [Nannochloropsis gaditana]	[T] KOG4743 Cyclin-dependent kinase inhibitor	Domain of unknown function DUF120	Classical arabinogalactan protein 4 OS=Arabidopsis thaliana GN=AGP4 PE=1 SV=1			GO:0046872//metal ion binding;GO:0006508//proteolysis;GO:0005576//extracellular region;GO:0016491//oxidoreductase activity
Unigene1273_All	2146	-8.74176	1.27945e-83	1.37278e-82	K03231//elongation factor 1-alpha+ko03013//RNA transport;K03231//elongation factor 1-alpha+ko03013//RNA transport;K03231//elongation factor 1-alpha+ko03013//RNA transport;K03231//elongation factor 1-alpha+ko03013//RNA transport;K03231//elongation factor 1-alpha+ko03013//RNA transport	elongation factor 1-alpha isoform X1 [Spinacia oleracea] >XP_021865661.1 elongation factor 1-alpha isoform X1 [Spinacia oleracea] >XP_021865662.1 elongation factor 1-alpha isoform X2 [Spinacia oleracea]	[J] KOG0052 Translation elongation factor EF-1 alpha/Tu	Elongation factor Tu GTP binding domain	Elongation factor 1-alpha OS=Vicia faba PE=2 SV=1		XM_009037689.1 Aureococcus anophagefferens hypothetical protein mRNA	GO:0003746//translation elongation factor activity;GO:0005525//GTP binding;GO:0005737//cytoplasm;GO:0003924//GTPase activity
CL916.Contig5_All	1986	-8.72433	2.62226e-42	1.7099e-41	K17609//nucleoredoxin [EC:1.8.1.8];K17609//nucleoredoxin [EC:1.8.1.8];K17609//nucleoredoxin [EC:1.8.1.8];K17609//nucleoredoxin [EC:1.8.1.8];K17609//nucleoredoxin [EC:1.8.1.8]	hypothetical protein POPTR_0010s06960g [Populus trichocarpa] >EEF00704.2 hypothetical protein POPTR_0010s06960g [Populus trichocarpa]	[G] KOG2806 Chitinase	Thioredoxin-like	Probable nucleoredoxin 1-2 OS=Oryza sativa subsp. japonica GN=Os03g0405900 PE=2 SV=1			GO:0005623//cell;GO:0005737//cytoplasm;GO:0045454//cell redox homeostasis;GO:0004791//thioredoxin-disulfide reductase activity
CL3342.Contig2_All	1653	-8.65843	8.71318e-80	9.03303e-79	K20416//palmitoyl-[glycerolipid] 7-desaturase [EC:1.14.19.42];K20416//palmitoyl-[glycerolipid] 7-desaturase [EC:1.14.19.42];K20416//palmitoyl-[glycerolipid] 7-desaturase [EC:1.14.19.42];K20416//palmitoyl-[glycerolipid] 7-desaturase [EC:1.14.19.42];K20416//palmitoyl-[glycerolipid] 7-desaturase [EC:1.14.19.42]	predicted protein [Thalassiosira pseudonana CCMP1335] >EED96172.1 predicted protein [Thalassiosira pseudonana CCMP1335]	[I] KOG1600 Fatty acid desaturase		Delta-9 acyl-lipid desaturase 2 OS=Arabidopsis thaliana GN=ADS2 PE=2 SV=2			GO:0016021//integral component of membrane;GO:0006633//fatty acid biosynthetic process;GO:0006629//lipid metabolic process;GO:0016717//oxidoreductase activity, acting on paired donors, with oxidation of a pair of donors resulting in the reduction of molecular oxygen to two molecules of water
CL10611.Contig2_All	718	-8.64352	3.60313e-24	1.58624e-23				Uncharacterized protein conserved in bacteria (DUF2309)
Unigene60807_All	2778	-8.63432	2.96426e-40	1.86186e-39	K17987//next to BRCA1 gene 1 protein;K14306//nuclear pore complex protein Nup62+ko03013//RNA transport;K14306//nuclear pore complex protein Nup62+ko03013//RNA transport	hypothetical protein BU14_1158s0001, partial [Porphyra umbilicalis]		Uncharacterized protein conserved in bacteria (DUF2309)
Unigene31942_All	992	-8.60426	1.36792e-39	8.50278e-39	K19706//dihydroceramide fatty acyl 2-hydroxylase [EC:1.14.18.7];K19706//dihydroceramide fatty acyl 2-hydroxylase [EC:1.14.18.7];K19706//dihydroceramide fatty acyl 2-hydroxylase [EC:1.14.18.7];K19706//dihydroceramide fatty acyl 2-hydroxylase [EC:1.14.18.7];K19706//dihydroceramide fatty acyl 2-hydroxylase [EC:1.14.18.7]	dihydroceramide fatty acyl 2-hydroxylase FAH1-like [Herrania umbratica] >XP_021298382.1 dihydroceramide fatty acyl 2-hydroxylase FAH1-like [Herrania umbratica]	[GO] KOG4157 beta-1,6-N-acetylglucosaminyltransferase, contains WSC domain	Fatty acid hydroxylase superfamily	Dihydroceramide fatty acyl 2-hydroxylase FAH2 OS=Arabidopsis thaliana GN=FAH2 PE=1 SV=1
Unigene12107_All	2650	-8.55353	1.88423e-148	3.05163e-147				Sec23/Sec24 helical domain
CL3869.Contig2_All	1662	-8.52818	5.89728e-38	3.54254e-37	K00128//aldehyde dehydrogenase (NAD+) [EC:1.2.1.3]+ko00410//beta-Alanine metabolism+ko00310//Lysine degradation+ko00010//Glycolysis / Gluconeogenesis+ko00903//Limonene and pinene degradation+ko00380//Tryptophan metabolism+ko00330//Arginine and proline metabolism+ko00280//Valine, leucine and isoleucine degradation+ko01100//Metabolic pathways+ko00053//Ascorbate and aldarate metabolism+ko00340//Hist…	aldehyde dehydrogenase (NAD+) [Galdieria sulphuraria] >EME26154.1 aldehyde dehydrogenase (NAD+) [Galdieria sulphuraria]	[C] KOG2450 Aldehyde dehydrogenase	Aldehyde dehydrogenase family	Aldehyde dehydrogenase family 2 member B4, mitochondrial OS=Arabidopsis thaliana GN=ALDH2B4 PE=1 SV=1		XM_005778977.1 Emiliania huxleyi CCMP1516 putative mitochondrial aldehyde dehydrogenase (ALDH10), mRNA	GO:0004029//aldehyde dehydrogenase (NAD) activity;GO:0016491//oxidoreductase activity
Unigene40303_All	2072	-8.52626	4.82233e-74	4.70781e-73		conserved hypothetical protein, partial [Ricinus communis]		Phage Tail Collar Domain
Unigene44127_All	955	-8.51822	9.54548e-38	5.71953e-37	K14491//two-component response regulator ARR-B family+ko04075//Plant hormone signal transduction	Transcriptional regulatory protein uhpA, putative, partial [Ricinus communis]		Response regulator receiver domain	Probable transcriptional regulator ycf29 OS=Pyropia yezoensis GN=ycf29 PE=3 SV=1
CL4754.Contig3_All	1048	-8.50641	1.68456e-37	1.00549e-36				Pleckstrin homology domain
CL3549.Contig3_All	1129	-8.48759	4.13117e-37	2.44441e-36	K22020//mucin-19	conserved unknown protein [Ectocarpus siliculosus]		Peptidase family M50	Membrane metalloprotease ARASP, chloroplastic OS=Arabidopsis thaliana GN=ARASP PE=2 SV=1		XM_001703660.1 Chlamydomonas reinhardtii predicted protein (CHLREDRAFT_154884), partial mRNA	GO:0004222//metalloendopeptidase activity;GO:0016021//integral component of membrane
Unigene48214_All	1686	-8.43528	4.77661e-36	2.76351e-35	K03006//DNA-directed RNA polymerase II subunit RPB1 [EC:2.7.7.6]+ko03020//RNA polymerase;K14306//nuclear pore complex protein Nup62+ko03013//RNA transport;K14306//nuclear pore complex protein Nup62+ko03013//RNA transport;K14306//nuclear pore complex protein Nup62+ko03013//RNA transport;K14306//nuclear pore complex protein Nup62+ko03013//RNA transport	hypothetical protein H310_01564 [Aphanomyces invadans] >ETW09114.1 hypothetical protein H310_01564 [Aphanomyces invadans]	[T] LSE0513 C 7-transmembrane receptor	Fatty acid desaturase	Leucine-rich repeat extensin-like protein 5 OS=Arabidopsis thaliana GN=LRX5 PE=2 SV=2		XM_009044732.1 Aureococcus anophagefferens hypothetical protein partial mRNA	GO:0004252//serine-type endopeptidase activity;GO:0016539//intein-mediated protein splicing;GO:0008233//peptidase activity;GO:0016021//integral component of membrane;GO:0006629//lipid metabolic process;GO:0016491//oxidoreductase activity
CL3869.Contig1_All	1748	-8.40073	2.31932e-35	1.32048e-34	K00128//aldehyde dehydrogenase (NAD+) [EC:1.2.1.3]+ko00410//beta-Alanine metabolism+ko00310//Lysine degradation+ko00010//Glycolysis / Gluconeogenesis+ko00903//Limonene and pinene degradation+ko00380//Tryptophan metabolism+ko00330//Arginine and proline metabolism+ko00280//Valine, leucine and isoleucine degradation+ko01100//Metabolic pathways+ko00053//Ascorbate and aldarate metabolism+ko00340//Hist…	aldehyde dehydrogenase (NAD+) [Galdieria sulphuraria] >EME26154.1 aldehyde dehydrogenase (NAD+) [Galdieria sulphuraria]	[C] KOG2450 Aldehyde dehydrogenase	Aldehyde dehydrogenase family	Aldehyde dehydrogenase family 2 member B7, mitochondrial OS=Arabidopsis thaliana GN=ALDH2B7 PE=1 SV=2			GO:0004029//aldehyde dehydrogenase (NAD) activity;GO:0016491//oxidoreductase activity
Unigene27755_All	1171	-8.35633	3.1415e-67	2.85448e-66		cytochrome c biogenesis protein (chloroplast) [Fargesia denudata] >ARM20403.1 cytochrome c biogenesis protein (chloroplast) [Fargesia denudata]		Periplasmic binding protein-like domain			LT799033.1 Quercus robur BAC genome sequence, isolate 87A05
CL6111.Contig1_All	1369	-8.32008	8.28842e-34	4.57335e-33	K21889//Bax inhibitor 1;K21889//Bax inhibitor 1;K21889//Bax inhibitor 1;K21889//Bax inhibitor 1;K21889//Bax inhibitor 1	putative BAX inhibitor [Ectocarpus siliculosus]	[V] KOG1629 Bax-mediated apoptosis inhibitor TEGT/BI-1	Inhibitor of apoptosis-promoting Bax1	Bax inhibitor 1 OS=Arabidopsis thaliana GN=BI-1 PE=1 SV=1			GO:0016021//integral component of membrane
CL5660.Contig7_All	2394	-8.31192	1.18014e-33	6.48616e-33	K14640//solute carrier family 20 (sodium-dependent phosphate transporter);K14640//solute carrier family 20 (sodium-dependent phosphate transporter);K14640//solute carrier family 20 (sodium-dependent phosphate transporter);K14640//solute carrier family 20 (sodium-dependent phosphate transporter)	phosphate transporter [Ostreococcus tauri]	[P] KOG2493 Na+/Pi symporter	Phosphate transporter family	Inorganic phosphate transporter 2-1, chloroplastic OS=Arabidopsis thaliana GN=PHT2-1 PE=1 SV=1			GO:0006817//phosphate ion transport;GO:0005315//inorganic phosphate transmembrane transporter activity;GO:0016021//integral component of membrane
Unigene47197_All	735	-8.29179	2.80353e-33	1.52944e-32	K22547//arsenate reductase [EC:1.20.4.1];K22547//arsenate reductase [EC:1.20.4.1];K22547//arsenate reductase [EC:1.20.4.1]	PREDICTED: thiosulfate sulfurtransferase 16, chloroplastic-like isoform X2 [Oryza brachyantha]		Rhodanese-like domain				GO:0005509//calcium ion binding
Unigene23990_All	1109	-8.29179	2.80353e-33	1.52944e-32			[TR] KOG4441 Proteins containing BTB/POZ and Kelch domains, involved in regulatory/signal transduction processes	BTB And C-terminal Kelch
CL77.Contig4_All	1959	-8.23651	1.74598e-139	2.69265e-138	K00430//peroxidase [EC:1.11.1.7]+ko01100//Metabolic pathways+ko01110//Biosynthesis of secondary metabolites+ko00940//Phenylpropanoid biosynthesis;K04733//interleukin-1 receptor-associated kinase 4 [EC:2.7.11.1];K04733//interleukin-1 receptor-associated kinase 4 [EC:2.7.11.1];K00430//peroxidase [EC:1.11.1.7]+ko01100//Metabolic pathways+ko01110//Biosynthesis of secondary metabolites+ko00940//Phenyl…	hypothetical protein Naga_101468g1, partial [Nannochloropsis gaditana]	[T] KOG4743 Cyclin-dependent kinase inhibitor	Domain of unknown function DUF120	Classical arabinogalactan protein 4 OS=Arabidopsis thaliana GN=AGP4 PE=1 SV=1			GO:0046872//metal ion binding;GO:0006508//proteolysis;GO:0005576//extracellular region;GO:0016491//oxidoreductase activity
Unigene86111_All	1284	-8.22423	4.78243e-32	2.53962e-31	K01758//cystathionine gamma-lyase [EC:4.4.1.1]+ko01230//Biosynthesis of amino acids+ko00450//Selenocompound metabolism+ko01100//Metabolic pathways+ko00260//Glycine, serine and threonine metabolism+ko00270//Cysteine and methionine metabolism;K01758//cystathionine gamma-lyase [EC:4.4.1.1]+ko01230//Biosynthesis of amino acids+ko00450//Selenocompound metabolism+ko01100//Metabolic pathways+ko00260//Gl…	unnamed protein product [Albugo laibachii Nc14]	[E] KOG0053 Cystathionine beta-lyases/cystathionine gamma-synthases	Cys/Met metabolism PLP-dependent enzyme	Cystathionine beta-lyase, chloroplastic OS=Arabidopsis thaliana GN=At3g57050 PE=1 SV=1		XM_009526707.1 Phytophthora sojae hypothetical protein partial mRNA	GO:0004123//cystathionine gamma-lyase activity;GO:0019346//transsulfuration;GO:0003824//catalytic activity;GO:0071266//'de novo' L-methionine biosynthetic process;GO:0005737//cytoplasm;GO:0003962//cystathionine gamma-synthase activity;GO:0019343//cysteine biosynthetic process via cystathionine;GO:0030170//pyridoxal phosphate binding
CL1066.Contig9_All	929	-8.22067	5.53815e-32	2.93749e-31
Unigene49846_All	2361	-8.21799	6.18267e-32	3.2748e-31	K18726//FAS-associated factor 2;K18726//FAS-associated factor 2;K18726//FAS-associated factor 2;K18726//FAS-associated factor 2;K18726//FAS-associated factor 2	plant UBX domain-containing protein 10 [Momordica charantia]	[T] KOG1363 Predicted regulator of the ubiquitin pathway (contains UAS and UBX domains)	2'-5' RNA ligase superfamily	Plant UBX domain-containing protein 10 OS=Arabidopsis thaliana GN=PUX10 PE=2 SV=1			GO:0005886//plasma membrane
Unigene46948_All	1263	-8.20933	8.17071e-62	6.9695e-61	K00161//pyruvate dehydrogenase E1 component alpha subunit [EC:1.2.4.1]+ko00010//Glycolysis / Gluconeogenesis+ko00020//Citrate cycle (TCA cycle)+ko01100//Metabolic pathways+ko01110//Biosynthesis of secondary metabolites+ko00620//Pyruvate metabolism+ko01200//Carbon metabolism;K00161//pyruvate dehydrogenase E1 component alpha subunit [EC:1.2.4.1]+ko00010//Glycolysis / Gluconeogenesis+ko00020//Citrat…	pyruvate dehydrogenase E1 component alpha subunit [Zea mays]	[C] KOG0225 Pyruvate dehydrogenase E1, alpha subunit	Dehydrogenase E1 component	Pyruvate dehydrogenase E1 component subunit alpha-2, mitochondrial OS=Oryza sativa subsp. japonica GN=Os06g0246500 PE=2 SV=1			GO:0043231//intracellular membrane-bounded organelle;GO:0004739//pyruvate dehydrogenase (acetyl-transferring) activity;GO:0006086//acetyl-CoA biosynthetic process from pyruvate
CL4761.Contig2_All	1655	-8.16749	3.40845e-42	2.21849e-41	K13998//dihydrofolate reductase / thymidylate synthase [EC:1.5.1.3 2.1.1.45]+ko00670//One carbon pool by folate+ko01100//Metabolic pathways+ko00790//Folate biosynthesis+ko00240//Pyrimidine metabolism;K13998//dihydrofolate reductase / thymidylate synthase [EC:1.5.1.3 2.1.1.45]+ko00670//One carbon pool by folate+ko01100//Metabolic pathways+ko00790//Folate biosynthesis+ko00240//Pyrimidine metabolism…	conserved unknown protein [Ectocarpus siliculosus]	[F] KOG0673 Thymidylate synthase	Thymidylate synthase	Bifunctional dihydrofolate reductase-thymidylate synthase OS=Zea mays GN=DRTS PE=2 SV=1		XM_009042443.1 Aureococcus anophagefferens hypothetical protein mRNA	GO:0006231//dTMP biosynthetic process;GO:0046654//tetrahydrofolate biosynthetic process;GO:0006730//one-carbon metabolic process;GO:0004799//thymidylate synthase activity;GO:0006545//glycine biosynthetic process;GO:0004146//dihydrofolate reductase activity
Unigene28883_All	1533	-8.15335	8.41592e-31	4.3597e-30	K13171//serine/arginine repetitive matrix protein 1+ko03015//mRNA surveillance pathway+ko03013//RNA transport;K09566//peptidyl-prolyl isomerase G (cyclophilin G) [EC:5.2.1.8];K13171//serine/arginine repetitive matrix protein 1+ko03015//mRNA surveillance pathway+ko03013//RNA transport;K13171//serine/arginine repetitive matrix protein 1+ko03015//mRNA surveillance pathway+ko03013//RNA transport	PREDICTED: mucin-17 [Tarenaya hassleriana]	[WV] KOG1216 von Willebrand factor and related coagulation proteins	Bacterial extracellular solute-binding protein
CL3280.Contig1_All	1657	-8.13328	3.55056e-59	2.92957e-58	K13172//serine/arginine repetitive matrix protein 2;K13171//serine/arginine repetitive matrix protein 1+ko03015//mRNA surveillance pathway+ko03013//RNA transport;K13171//serine/arginine repetitive matrix protein 1+ko03015//mRNA surveillance pathway+ko03013//RNA transport;K13171//serine/arginine repetitive matrix protein 1+ko03015//mRNA surveillance pathway+ko03013//RNA transport	putative amino-acid ABC transporter permease protein YhdX, partial [Symbiodinium microadriaticum]	[A] KOG1869 Splicing coactivator SRm160/300, subunit SRm300	Bacterial extracellular solute-binding proteins, family 3				GO:0016021//integral component of membrane
CL8393.Contig2_All	5766	-8.12346	2.73032e-30	1.39879e-29	K01687//dihydroxy-acid dehydratase [EC:4.2.1.9]+ko00290//Valine, leucine and isoleucine biosynthesis+ko00770//Pantothenate and CoA biosynthesis+ko01230//Biosynthesis of amino acids+ko01100//Metabolic pathways+ko01110//Biosynthesis of secondary metabolites+ko01210//2-Oxocarboxylic acid metabolism;K01687//dihydroxy-acid dehydratase [EC:4.2.1.9]+ko00290//Valine, leucine and isoleucine biosynthesis+k…	dehydratase family protein [Populus trichocarpa] >EEE84088.1 dehydratase family protein [Populus trichocarpa]	[E] KOG2448 Dihydroxy-acid dehydratase	Dehydratase family	Sulfate permease 2, chloroplastic OS=Chlamydomonas reinhardtii GN=SULP2 PE=1 SV=1			GO:0004160//dihydroxy-acid dehydratase activity;GO:0009082//branched-chain amino acid biosynthetic process;GO:0009570//chloroplast stroma
Unigene58574_All	2780	-8.12187	2.90523e-30	1.48748e-29	K13171//serine/arginine repetitive matrix protein 1+ko03015//mRNA surveillance pathway+ko03013//RNA transport;K13171//serine/arginine repetitive matrix protein 1+ko03015//mRNA surveillance pathway+ko03013//RNA transport;K22020//mucin-19;K13171//serine/arginine repetitive matrix protein 1+ko03015//mRNA surveillance pathway+ko03013//RNA transport;K13171//serine/arginine repetitive matrix protein 1+…	hypothetical protein BU14_0066s0031 [Porphyra umbilicalis]	[R] KOG0382 Carbonic anhydrase	AcrB/AcrD/AcrF family	Alpha carbonic anhydrase 8 OS=Arabidopsis thaliana GN=ACA8 PE=3 SV=3
CL8020.Contig2_All	1733	-8.10351	5.92764e-30	3.01324e-29
CL2726.Contig1_All	1783	-8.10049	6.65859e-30	3.37791e-29		hypothetical protein THAOC_13553, partial [Thalassiosira oceanica]		Bacterial extracellular solute-binding proteins, family 3				GO:0016021//integral component of membrane
CL3038.Contig1_All	2506	-8.08672	5.11083e-169	9.21703e-168	K09566//peptidyl-prolyl isomerase G (cyclophilin G) [EC:5.2.1.8];K09566//peptidyl-prolyl isomerase G (cyclophilin G) [EC:5.2.1.8];K13171//serine/arginine repetitive matrix protein 1+ko03015//mRNA surveillance pathway+ko03013//RNA transport;K09566//peptidyl-prolyl isomerase G (cyclophilin G) [EC:5.2.1.8]	conserved hypothetical protein [Ricinus communis]	[K] LSE0096 H SON DNA-binding protein/negative regulatory element-binding protein	Branched-chain amino acid transport system / permease component	Protein TRIGALACTOSYLDIACYLGLYCEROL 3, chloroplastic OS=Arabidopsis thaliana GN=TGD3 PE=1 SV=1
CL1868.Contig1_All	2866	-8.08469	1.22206e-29	6.16365e-29		Villin-1 [Phytophthora nicotianae]	[Z] KOG0444 Cytoskeletal regulator Flightless-I (contains leucine-rich and gelsolin repeats)	Gelsolin repeat				GO:0051015//actin filament binding;GO:0007010//cytoskeleton organization
Unigene57562_All	1454	-8.0788	2.36964e-57	1.91796e-56	K22020//mucin-19;K16628//collagen, type VII, alpha	succinyl CoA transferase, putative [Phytophthora infestans T30-4] >EEY59065.1 succinyl CoA transferase, putative [Phytophthora infestans T30-4]	[C] KOG3822 Succinyl-CoA:alpha-ketoacid-CoA transferase	Coenzyme A transferase			XM_012350338.1 Saprolegnia parasitica CBS 223.65 succinyl-CoA:3-ketoacid-coenzyme A transferase mRNA	GO:0005739//mitochondrion;GO:0046952//ketone body catabolic process;GO:0008260//3-oxoacid CoA-transferase activity
CL257.Contig10_All	3359	-8.05522	3.73989e-29	1.86651e-28				FAR1 DNA-binding domain
Unigene15336_All	2317	-8.04965	4.61036e-29	2.29574e-28		predicted protein [Thalassiosira pseudonana CCMP1335] >EED87164.1 predicted protein [Thalassiosira pseudonana CCMP1335]		Paraquat-inducible protein A				GO:0008289//lipid binding;GO:0016021//integral component of membrane
Unigene31586_All	945	-8.04563	5.3606e-29	2.66292e-28		hypothetical protein AURANDRAFT_70670, partial [Aureococcus anophagefferens] >EGB11868.1 hypothetical protein AURANDRAFT_70670, partial [Aureococcus anophagefferens]		Sulfur oxidation protein SoxY
Unigene31685_All	993	-8.04563	5.3606e-29	2.66292e-28
CL1138.Contig10_All	3600	-8.0257	1.12653e-28	5.55344e-28				Herpesvirus glycoprotein D/GG/GX domain
Unigene30581_All	3088	-7.9886	1.90334e-54	1.48587e-53		hypothetical protein AURANDRAFT_70520 [Aureococcus anophagefferens] >EGB12618.1 hypothetical protein AURANDRAFT_70520 [Aureococcus anophagefferens]		Schizosaccharomyces pombe repeat of unknown function (DUF963)				GO:0005509//calcium ion binding
CL257.Contig2_All	2545	-7.98394	5.20415e-28	2.52393e-27		protein FAR1-RELATED SEQUENCE 5-like [Spinacia oleracea]
CL1880.Contig2_All	1418	-7.97815	4.0458e-54	3.14312e-53	K01674//carbonic anhydrase [EC:4.2.1.1]+ko00910//Nitrogen metabolism;K14651//transcription initiation factor TFIID subunit 15+ko03022//Basal transcription factors;K11593//eukaryotic translation initiation factor 2C	similar to hedgehog protein [Cyanidioschyzon merolae strain 10D] >BAM79537.1 similar to hedgehog protein [Cyanidioschyzon merolae strain 10D]	[J] KOG1041 Translation initiation factor 2C (eIF-2C) and related proteins	Lectin C-type domain	Protein argonaute 3 OS=Arabidopsis thaliana GN=AGO3 PE=3 SV=1		XM_001693996.1 Chlamydomonas reinhardtii 88 kDa extracellular polypeptide (ECP88), mRNA	GO:0016539//intein-mediated protein splicing;GO:0008233//peptidase activity;GO:0016021//integral component of membrane
Unigene25036_All	1318	-7.95327	1.56687e-27	7.51403e-27
CL323.Contig2_All	2277	-7.93708	2.78273e-27	1.3249e-26	K19600//tubby-related protein 1;K19600//tubby-related protein 1;K19600//tubby-related protein 1	conserved unknown protein [Ectocarpus siliculosus]	[R] KOG2502 Tub family proteins	Tub family	Tubby-like F-box protein 11 OS=Oryza sativa subsp. japonica GN=TULP11 PE=2 SV=1	TUB
CL490.Contig3_All	1596	-7.91993	6.62373e-20	2.55002e-19	K15188//cyclin T;K15188//cyclin T;K15188//cyclin T;K15188//cyclin T;K15188//cyclin T	Cycline T [Ectocarpus siliculosus]	[D] KOG0834 CDK9 kinase-activating protein cyclin T	Cyclin, N-terminal domain	Cyclin-T1-3 OS=Oryza sativa subsp. japonica GN=CYCT1-3 PE=3 SV=2
Unigene25149_All	1793	-7.91705	5.62581e-27	2.66221e-26		uncharacterized protein LOC100382025 [Zea mays] >ACN27627.1 unknown [Zea mays]
CL1752.Contig10_All	1865	-7.91705	5.62581e-27	2.66221e-26				Bacterial extracellular solute-binding protein
Unigene24387_All	978	-7.90477	8.62825e-27	4.06328e-26				Prokaryotic cytochrome b561
Unigene13946_All	726	-7.90095	2.96164e-54	2.30589e-53
Unigene6514_All	1130	-7.89986	1.61675e-235	3.80976e-234				POU domain, class 2, associating factor 1
CL1121.Contig17_All	2611	-7.89723	1.12045e-26	5.26356e-26	K18660//malonyl-CoA/methylmalonyl-CoA synthetase [EC:6.2.1.-]+ko00280//Valine, leucine and isoleucine degradation;K01897//long-chain acyl-CoA synthetase [EC:6.2.1.3]+ko04146//Peroxisome+ko01100//Metabolic pathways+ko00061//Fatty acid biosynthesis+ko01212//Fatty acid metabolism+ko00071//Fatty acid degradation;K01897//long-chain acyl-CoA synthetase [EC:6.2.1.3]+ko04146//Peroxisome+ko01100//Metaboli…	long chain acyl-coA synthetase [Ectocarpus siliculosus]	[I] KOG1256 Long-chain acyl-CoA synthetases (AMP-forming)	AMP-binding enzyme				GO:0008152//metabolic process;GO:0003824//catalytic activity
Unigene60449_All	1004	-7.86729	3.1278e-26	1.45491e-25				Bacterial regulatory helix-turn-helix protein, lysR family
CL5675.Contig4_All	358	-7.85701	4.43407e-26	2.05493e-25
Unigene33507_All	3841	-7.83331	0	0	K13172//serine/arginine repetitive matrix protein 2;K22020//mucin-19;K13171//serine/arginine repetitive matrix protein 1+ko03015//mRNA surveillance pathway+ko03013//RNA transport;K13171//serine/arginine repetitive matrix protein 1+ko03015//mRNA surveillance pathway+ko03013//RNA transport;K13171//serine/arginine repetitive matrix protein 1+ko03015//mRNA surveillance pathway+ko03013//RNA transport	hypothetical protein AK812_SmicGene48944, partial [Symbiodinium microadriaticum]	[AR] KOG2146 Splicing coactivator SRm160/300, subunit SRm160 (contains PWI domain)	Tripartite tricarboxylate transporter TctA family
Unigene27522_All	1333	-7.82882	1.14229e-25	5.23265e-25
Unigene7765_All	232	-7.79596	3.38129e-25	1.5324e-24
CL8212.Contig3_All	1855	-7.78929	4.20364e-25	1.89834e-24	K04077//chaperonin GroEL+ko03018//RNA degradation;K04077//chaperonin GroEL+ko03018//RNA degradation;K04077//chaperonin GroEL+ko03018//RNA degradation;K04077//chaperonin GroEL+ko03018//RNA degradation	chaperonin CPN60-1, mitochondrial precursor [Blastocystis sp. ATCC 50177/Nand II]	[O] KOG0356 Mitochondrial chaperonin, Cpn60/Hsp60p	Amidohydrolase	60 kDa chaperonin, chloroplastic OS=Cyanidium caldarium GN=groL PE=3 SV=1			GO:0005524//ATP binding;GO:0042026//protein refolding;GO:0005737//cytoplasm;GO:0009507//chloroplast
CL9389.Contig1_All	1492	-7.76306	7.77797e-53	5.95145e-52		conserved unknown protein [Ectocarpus siliculosus]		Plasma-membrane choline transporter
Unigene27286_All	1769	-7.76233	1.00634e-24	4.49882e-24	K00799//glutathione S-transferase [EC:2.5.1.18]+ko00480//Glutathione metabolism;K00799//glutathione S-transferase [EC:2.5.1.18]+ko00480//Glutathione metabolism;K00799//glutathione S-transferase [EC:2.5.1.18]+ko00480//Glutathione metabolism;K00799//glutathione S-transferase [EC:2.5.1.18]+ko00480//Glutathione metabolism	hypothetical protein F511_16196 [Dorcoceras hygrometricum]	[O] KOG0867 Glutathione S-transferase	Protein of unknown function (DUF1428)	Glutathione S-transferase 4 OS=Zea mays GN=GST4 PE=1 SV=2			GO:0005840//ribosome;GO:0006412//translation;GO:0003735//structural constituent of ribosome
CL5343.Contig2_All	1271	-7.75919	1.11287e-24	4.97057e-24	K01051//pectinesterase [EC:3.1.1.11]+ko00040//Pentose and glucuronate interconversions+ko01100//Metabolic pathways	hypothetical protein AURANDRAFT_11765, partial [Aureococcus anophagefferens] >EGB11229.1 hypothetical protein AURANDRAFT_11765, partial [Aureococcus anophagefferens]	[TZ] KOG3671 Actin regulatory protein (Wiskott-Aldrich syndrome protein)	HI0933-like protein	Formin-like protein 14 OS=Oryza sativa subsp. japonica GN=FH14 PE=2 SV=1
Unigene38788_All	892	-7.74865	1.55913e-24	6.93452e-24	K10260//F-box and WD-40 domain protein 7+ko04120//Ubiquitin mediated proteolysis;K14963//COMPASS component SWD3	hypothetical protein AURANDRAFT_34671, partial [Aureococcus anophagefferens] >EGB02983.1 hypothetical protein AURANDRAFT_34671, partial [Aureococcus anophagefferens]	[S] KOG0281 Beta-TrCP (transducin repeats containing)/Slimb proteins	WD domain, G-beta repeat	Transcription initiation factor TFIID subunit 5 OS=Arabidopsis thaliana GN=TAF5 PE=1 SV=1			GO:0004842//ubiquitin-protein transferase activity
Unigene7213_All	2973	-7.71684	4.26357e-24	1.87317e-23	K01648//ATP citrate (pro-S)-lyase [EC:2.3.3.8]+ko00020//Citrate cycle (TCA cycle)+ko01100//Metabolic pathways+ko01110//Biosynthesis of secondary metabolites;K01648//ATP citrate (pro-S)-lyase [EC:2.3.3.8]+ko00020//Citrate cycle (TCA cycle)+ko01100//Metabolic pathways+ko01110//Biosynthesis of secondary metabolites;K01648//ATP citrate (pro-S)-lyase [EC:2.3.3.8]+ko00020//Citrate cycle (TCA cycle)+ko0…	atp-citrate synthase [Phaeodactylum tricornutum CCAP 1055/1] >EEC48223.1 atp-citrate synthase [Phaeodactylum tricornutum CCAP 1055/1]	[C] KOG1254 ATP-citrate lyase	Citrate synthase, C-terminal domain	ATP-citrate synthase beta chain protein 2 OS=Arabidopsis thaliana GN=ACLB-2 PE=1 SV=1		XM_008608685.1 Saprolegnia diclina VS20 ATP-citrate synthase mRNA	GO:0006101//citrate metabolic process;GO:0006085//acetyl-CoA biosynthetic process;GO:0003878//ATP citrate synthase activity;GO:0046872//metal ion binding;GO:0005524//ATP binding;GO:0048037//cofactor binding;GO:0005737//cytoplasm;GO:0006629//lipid metabolic process
CL3428.Contig1_All	1010	-7.70919	3.54682e-135	5.35367e-134
CL8575.Contig1_All	1163	-7.69381	3.34873e-62	2.87566e-61		unnamed protein product [Albugo candida]		bZIP transcription factor
CL10391.Contig1_All	1998	-7.69133	9.43291e-24	4.10368e-23	K00088//IMP dehydrogenase [EC:1.1.1.205]+ko00230//Purine metabolism+ko01100//Metabolic pathways+ko01110//Biosynthesis of secondary metabolites;K00088//IMP dehydrogenase [EC:1.1.1.205]+ko00230//Purine metabolism+ko01100//Metabolic pathways+ko01110//Biosynthesis of secondary metabolites;K00088//IMP dehydrogenase [EC:1.1.1.205]+ko00230//Purine metabolism+ko01100//Metabolic pathways+ko01110//Biosynth…	GMP reductase [Phytophthora parasitica INRA-310] >ETK94641.1 GMP reductase [Phytophthora parasitica] >ETL48042.1 GMP reductase [Phytophthora parasitica] >ETN15066.1 GMP reductase [Phytophthora parasitica INRA-310] >ETO83549.1 GMP reductase [Phytophthora parasitica P1976] >ETP24622.1 GMP reductase [Phytophthora parasitica CJ01A1] >ETP52583.1 GMP reductase [Phytophthora parasitica P10297] >KUF79709…	[F] KOG2550 IMP dehydrogenase/GMP reductase	IMP dehydrogenase / GMP reductase domain	GMP reductase OS=Phytophthora infestans PE=2 SV=1		XM_005792096.1 Emiliania huxleyi CCMP1516 guanosine monophosphate reductase partial mRNA	GO:0046872//metal ion binding;GO:1902560//GMP reductase complex;GO:0003920//GMP reductase activity;GO:0006164//purine nucleotide biosynthetic process;GO:0006144//purine nucleobase metabolic process;GO:0003938//IMP dehydrogenase activity;GO:0006163//purine nucleotide metabolic process
Unigene7503_All	1198	-7.66376	4.32919e-45	2.9608e-44				Myb-like DNA-binding domain		MYB
CL2864.Contig2_All	1113	-7.65748	2.66043e-23	1.14398e-22		expressed unknown protein [Ectocarpus siliculosus]
Unigene27975_All	1185	-7.63833	4.74354e-23	2.02361e-22				PLAC8 family
CL9106.Contig2_All	1048	-7.63432	5.35e-23	2.27861e-22		hypothetical protein CEUSTIGMA_g7282.t1 [Chlamydomonas eustigma]		NMT1-like family
CL10333.Contig2_All	1569	-7.62836	6.39469e-23	2.71657e-22	K02520//translation initiation factor IF-3;K02520//translation initiation factor IF-3;K02520//translation initiation factor IF-3;K02520//translation initiation factor IF-3	hypothetical protein F511_09458 [Dorcoceras hygrometricum]	[J] KOG4707 Mitochondrial/chloroplast ribosomal protein L20	Ribosomal protein L20	Translation initiation factor IF-3, chloroplastic OS=Gracilaria tenuistipitata var. liui GN=infC PE=3 SV=1			GO:0003743//translation initiation factor activity;GO:0009536//plastid
CL4905.Contig5_All	1400	-7.61214	9.47004e-44	6.33382e-43				Myb-like DNA-binding domain		MYB
Unigene9296_All	1453	-7.6068	0	0
Unigene17673_All	1429	-7.60426	2.79787e-85	3.03605e-84	K00297//methylenetetrahydrofolate reductase (NADPH) [EC:1.5.1.20]+ko00670//One carbon pool by folate+ko01100//Metabolic pathways+ko01200//Carbon metabolism;K00297//methylenetetrahydrofolate reductase (NADPH) [EC:1.5.1.20]+ko00670//One carbon pool by folate+ko01100//Metabolic pathways+ko01200//Carbon metabolism;K00297//methylenetetrahydrofolate reductase (NADPH) [EC:1.5.1.20]+ko00670//One carbon p…	5,10-methylenetetrahydrofolate reductase [Ostreococcus tauri]	[E] KOG0564 5,10-methylenetetrahydrofolate reductase	Methylenetetrahydrofolate reductase	Methylenetetrahydrofolate reductase 1 OS=Arabidopsis thaliana GN=MTHFR1 PE=1 SV=1			GO:0005829//cytosol;GO:0004489//methylenetetrahydrofolate reductase (NAD(P)H) activity;GO:0035999//tetrahydrofolate interconversion;GO:0009086//methionine biosynthetic process
Unigene18015_All	1313	-7.60046	3.0846e-24	1.36098e-23
CL5523.Contig3_All	1401	-7.55797	5.0308e-22	2.07977e-21	K13171//serine/arginine repetitive matrix protein 1+ko03015//mRNA surveillance pathway+ko03013//RNA transport;K10990//RecQ-mediated genome instability protein 1	hypothetical protein BU14_0249s0003 [Porphyra umbilicalis]		NMT1-like family				GO:0004252//serine-type endopeptidase activity
Unigene21500_All	3328	-7.55797	2.198e-42	1.43476e-41	K01534//Cd2+/Zn2+-exporting ATPase [EC:3.6.3.3 3.6.3.5];K01534//Cd2+/Zn2+-exporting ATPase [EC:3.6.3.3 3.6.3.5]	heavy metal translocating P-type ATPase [Ostreococcus tauri]	[P] KOG0207 Cation transport ATPase	E1-E2 ATPase	Cadmium/zinc-transporting ATPase HMA2 OS=Arabidopsis thaliana GN=HMA2 PE=2 SV=1			GO:0046872//metal ion binding;GO:0000166//nucleotide binding;GO:0019829//cation-transporting ATPase activity;GO:0016021//integral component of membrane;GO:0030001//metal ion transport
Unigene8046_All	2041	-7.54753	0	0	K01404//leishmanolysin [EC:3.4.24.36];K01404//leishmanolysin [EC:3.4.24.36];K01404//leishmanolysin [EC:3.4.24.36];K01404//leishmanolysin [EC:3.4.24.36]	conserved unknown protein [Ectocarpus siliculosus]	[TW] KOG1225 Teneurin-1 and related extracellular matrix proteins, contain EGF-like repeats	EGF-like domain			XM_012347478.1 Saprolegnia parasitica CBS 223.65 hypothetical protein partial mRNA	GO:0016021//integral component of membrane
CL3175.Contig1_All	1354	-7.54663	6.96138e-22	2.86289e-21
CL3517.Contig4_All	1040	-7.54292	6.10335e-15	1.92858e-14				Protein of unknown function (DUF2533)
Unigene16568_All	1198	-7.5422	7.89976e-22	3.24183e-21
Unigene16436_All	1367	-7.5422	7.89976e-22	3.24183e-21	K10807//ribonucleoside-diphosphate reductase subunit M1 [EC:1.17.4.1]+ko00230//Purine metabolism+ko01100//Metabolic pathways+ko00240//Pyrimidine metabolism+ko00480//Glutathione metabolism;K10807//ribonucleoside-diphosphate reductase subunit M1 [EC:1.17.4.1]+ko00230//Purine metabolism+ko01100//Metabolic pathways+ko00240//Pyrimidine metabolism+ko00480//Glutathione metabolism;K10807//ribonucleoside-…	ribonucleoside-diphosphate reductase large subunit [Dendrobium catenatum]	[F] KOG1112 Ribonucleotide reductase, alpha subunit	Ribonucleotide reductase, barrel domain	Ribonucleoside-diphosphate reductase large subunit OS=Arabidopsis thaliana GN=RNR1 PE=1 SV=1
CL1333.Contig2_All	1351	-7.53815	6.78458e-42	4.39178e-41		hypothetical protein FisN_16Hu024 [Fistulifera solaris]	[W] TWOG0102 Thrombospondin/Oligomeric matrix protein precursor (COMP)	OmpA family
CL777.Contig3_All	2484	-7.5353	2.00635e-41	1.28835e-40	K12875//apoptotic chromatin condensation inducer in the nucleus+ko03040//Spliceosome+ko03015//mRNA surveillance pathway+ko03013//RNA transport;K08819//cyclin-dependent kinase 12/13 [EC:2.7.11.22 2.7.11.23];K10990//RecQ-mediated genome instability protein 1;K13171//serine/arginine repetitive matrix protein 1+ko03015//mRNA surveillance pathway+ko03013//RNA transport	hypothetical protein H310_03146 [Aphanomyces invadans] >ETW07074.1 hypothetical protein H310_03146 [Aphanomyces invadans]	[WV] KOG1216 von Willebrand factor and related coagulation proteins	Lectin C-type domain	Myrosinase-binding protein 2 OS=Arabidopsis thaliana GN=MBP2 PE=2 SV=1			GO:0004252//serine-type endopeptidase activity;GO:0016021//integral component of membrane
Unigene44092_All	1037	-7.52626	1.24177e-21	5.06827e-21	K09566//peptidyl-prolyl isomerase G (cyclophilin G) [EC:5.2.1.8];K09566//peptidyl-prolyl isomerase G (cyclophilin G) [EC:5.2.1.8];K09566//peptidyl-prolyl isomerase G (cyclophilin G) [EC:5.2.1.8];K09566//peptidyl-prolyl isomerase G (cyclophilin G) [EC:5.2.1.8]	hypothetical protein AURANDRAFT_70670, partial [Aureococcus anophagefferens] >EGB11868.1 hypothetical protein AURANDRAFT_70670, partial [Aureococcus anophagefferens]		Bacterial extracellular solute-binding protein, family 7
CL8756.Contig2_All	1564	-7.52241	1.38437e-21	5.64149e-21	K00253//isovaleryl-CoA dehydrogenase [EC:1.3.8.4]+ko00280//Valine, leucine and isoleucine degradation+ko01100//Metabolic pathways;K00253//isovaleryl-CoA dehydrogenase [EC:1.3.8.4]+ko00280//Valine, leucine and isoleucine degradation+ko01100//Metabolic pathways;K00253//isovaleryl-CoA dehydrogenase [EC:1.3.8.4]+ko00280//Valine, leucine and isoleucine degradation+ko01100//Metabolic pathways;K00253//i…	Isovaleryl-CoA dehydrogenase [Klebsormidium nitens]	[EI] KOG0141 Isovaleryl-CoA dehydrogenase	Acyl-CoA dehydrogenase, C-terminal domain	Isovaleryl-CoA dehydrogenase, mitochondrial OS=Arabidopsis thaliana GN=IVD PE=1 SV=2			GO:0050660//flavin adenine dinucleotide binding;GO:0003995//acyl-CoA dehydrogenase activity
CL5398.Contig3_All	1146	-7.51224	1.84207e-21	7.47665e-21	K15100//solute carrier family 25 (mitochondrial citrate transporter), member 1;K15100//solute carrier family 25 (mitochondrial citrate transporter), member 1;K15100//solute carrier family 25 (mitochondrial citrate transporter), member 1;K15100//solute carrier family 25 (mitochondrial citrate transporter), member 1;K15100//solute carrier family 25 (mitochondrial citrate transporter), member 1	conserved unknown protein [Ectocarpus siliculosus]	[C] KOG0756 Mitochondrial tricarboxylate/dicarboxylate carrier proteins	Mitochondrial carrier protein	Mitochondrial succinate-fumarate transporter 1 OS=Arabidopsis thaliana GN=SFC1 PE=2 SV=1			GO:0055085//transmembrane transport;GO:0016021//integral component of membrane
Unigene60498_All	393	-7.51062	1.92759e-21	7.81545e-21
Unigene6536_All	632	-7.49384	3.07805e-21	1.24031e-20
Unigene32728_All	687	-7.49384	3.07805e-21	1.24031e-20			[M] KOG4701 Chitinase	Gram-negative bacterial TonB protein C-terminal
CL3185.Contig2_All	1206	-7.49384	3.07805e-21	1.24031e-20	K13171//serine/arginine repetitive matrix protein 1+ko03015//mRNA surveillance pathway+ko03013//RNA transport;K09566//peptidyl-prolyl isomerase G (cyclophilin G) [EC:5.2.1.8];K09566//peptidyl-prolyl isomerase G (cyclophilin G) [EC:5.2.1.8];K13171//serine/arginine repetitive matrix protein 1+ko03015//mRNA surveillance pathway+ko03013//RNA transport;K13171//serine/arginine repetitive matrix protein…	hypothetical protein EMIHUDRAFT_424661, partial [Emiliania huxleyi CCMP1516] >EOD21505.1 hypothetical protein EMIHUDRAFT_424661, partial [Emiliania huxleyi CCMP1516]	[A] KOG1869 Splicing coactivator SRm160/300, subunit SRm300	Periplasmic binding protein				GO:0006397//mRNA processing
Unigene42901_All	1183	-7.47735	4.85389e-21	1.94002e-20		expressed protein, partial [Aureococcus anophagefferens] >EGB02058.1 expressed protein, partial [Aureococcus anophagefferens]		Transposase, Mutator family
Unigene73289_All	1433	-7.47735	4.85389e-21	1.94002e-20	K22314//glucosinolate gamma-glutamyl hydrolase [EC:3.4.19.16];K22314//glucosinolate gamma-glutamyl hydrolase [EC:3.4.19.16];K22314//glucosinolate gamma-glutamyl hydrolase [EC:3.4.19.16]	hypothetical protein AURANDRAFT_71898, partial [Aureococcus anophagefferens] >EGB07050.1 hypothetical protein AURANDRAFT_71898, partial [Aureococcus anophagefferens]	[R] KOG0118 FOG: RRM domain	Glutamine amidotransferase class-I	Serine/arginine-rich splicing factor SR45 OS=Arabidopsis thaliana GN=SR45 PE=1 SV=1
Unigene48221_All	1490	-7.47735	4.85389e-21	1.94002e-20	K14306//nuclear pore complex protein Nup62+ko03013//RNA transport;K14306//nuclear pore complex protein Nup62+ko03013//RNA transport;K14306//nuclear pore complex protein Nup62+ko03013//RNA transport;K14306//nuclear pore complex protein Nup62+ko03013//RNA transport;K14306//nuclear pore complex protein Nup62+ko03013//RNA transport	uncharacterized protein DDB_G0271670, partial [Zea mays]	[GO] KOG4157 beta-1,6-N-acetylglucosaminyltransferase, contains WSC domain	Protein of unknown function (DUF2497)	Nuclear pore complex protein NUP62 OS=Arabidopsis thaliana GN=NUP62 PE=1 SV=1
Unigene43376_All	997	-7.47735	4.85389e-21	1.94002e-20
Unigene43558_All	1349	-7.46903	3.14512e-40	1.97396e-39	K00297//methylenetetrahydrofolate reductase (NADPH) [EC:1.5.1.20]+ko00670//One carbon pool by folate+ko01100//Metabolic pathways+ko01200//Carbon metabolism;K00297//methylenetetrahydrofolate reductase (NADPH) [EC:1.5.1.20]+ko00670//One carbon pool by folate+ko01100//Metabolic pathways+ko01200//Carbon metabolism;K00297//methylenetetrahydrofolate reductase (NADPH) [EC:1.5.1.20]+ko00670//One carbon p…	5,10-methylenetetrahydrofolate reductase [Ostreococcus tauri]	[E] KOG0564 5,10-methylenetetrahydrofolate reductase	Methylenetetrahydrofolate reductase	Methylenetetrahydrofolate reductase 1 OS=Arabidopsis thaliana GN=MTHFR1 PE=1 SV=1
Unigene76733_All	1797	-7.46837	6.2102e-21	2.47277e-20	K13171//serine/arginine repetitive matrix protein 1+ko03015//mRNA surveillance pathway+ko03013//RNA transport;K13171//serine/arginine repetitive matrix protein 1+ko03015//mRNA surveillance pathway+ko03013//RNA transport;K13171//serine/arginine repetitive matrix protein 1+ko03015//mRNA surveillance pathway+ko03013//RNA transport;K14325//RNA-binding protein with serine-rich domain 1+ko03015//mRNA s…	M6 metalloprotease, partial [Fragilariopsis cylindrus CCMP1102]	[K] LSE0096 H SON DNA-binding protein/negative regulatory element-binding protein	EF hand				GO:0008237//metallopeptidase activity
Unigene48195_All	963	-7.46067	7.66262e-21	3.04329e-20				2-keto-3-deoxy-galactonokinase
CL5198.Contig2_All	526	-7.45949	7.91179e-21	3.141e-20
CL6049.Contig1_All	1321	-7.4558	8.74922e-21	3.46875e-20		conserved hypothetical protein [Phytophthora infestans T30-4] >EEY57715.1 conserved hypothetical protein [Phytophthora infestans T30-4]
CL1066.Contig3_All	1656	-7.44475	7.72763e-86	8.4167e-85
Unigene74714_All	1513	-7.4438	1.211e-20	4.77527e-20	K00031//isocitrate dehydrogenase [EC:1.1.1.42]+ko04146//Peroxisome+ko00020//Citrate cycle (TCA cycle)+ko01230//Biosynthesis of amino acids+ko01100//Metabolic pathways+ko01110//Biosynthesis of secondary metabolites+ko01210//2-Oxocarboxylic acid metabolism+ko01200//Carbon metabolism+ko00480//Glutathione metabolism;K00031//isocitrate dehydrogenase [EC:1.1.1.42]+ko04146//Peroxisome+ko00020//Citrate c…	predicted protein [Hordeum vulgare subsp. vulgare]	[C] KOG1526 NADP-dependent isocitrate dehydrogenase	Isocitrate/isopropylmalate dehydrogenase	Isocitrate dehydrogenase [NADP] OS=Glycine max GN=IDH1 PE=2 SV=2		XM_011401993.1 Auxenochlorella protothecoides Isocitrate dehydrogenase [NADP], chloroplastic partial mRNA	GO:0006099//tricarboxylic acid cycle;GO:0000287//magnesium ion binding;GO:0004450//isocitrate dehydrogenase (NADP+) activity;GO:0006102//isocitrate metabolic process;GO:0051287//NAD binding
Unigene43042_All	1992	-7.4438	1.211e-20	4.77527e-20		hypothetical protein MNEG_13680 [Monoraphidium neglectum] >KIY94282.1 hypothetical protein MNEG_13680 [Monoraphidium neglectum]		Cellulose binding domain				GO:0008237//metallopeptidase activity
CL5879.Contig1_All	1715	-7.44006	1.33948e-20	5.2748e-20
Unigene24190_All	591	-7.42672	1.91598e-20	7.51529e-20				Domain of unknown function (DUF4167)
Unigene43205_All	1719	-7.42672	1.91598e-20	7.51529e-20	K22020//mucin-19;K14007//protein transport protein SEC24+ko04141//Protein processing in endoplasmic reticulum;K02184//formin 2;K14325//RNA-binding protein with serine-rich domain 1+ko03015//mRNA surveillance pathway+ko03013//RNA transport;K14325//RNA-binding protein with serine-rich domain 1+ko03015//mRNA surveillance pathway+ko03013//RNA transport	hypothetical protein BU14_0066s0031 [Porphyra umbilicalis]	[W] KOG3544 Collagens (type IV and type XIII), and related proteins	Phage integrase family	Formin-like protein 14 OS=Arabidopsis thaliana GN=FH14 PE=3 SV=3			GO:0015074//DNA integration;GO:0003677//DNA binding;GO:0006310//DNA recombination
CL10834.Contig4_All	3234	-7.3988	4.0199e-20	1.56064e-19	K22020//mucin-19;K02184//formin 2;K02184//formin 2	plus agglutinin, partial [Chlamydomonas incerta]	[M] LSE0601 A Pollen extensin-like protein (Pex)	WW domain	Proline-rich receptor-like protein kinase PERK9 OS=Arabidopsis thaliana GN=PERK9 PE=1 SV=1		XM_005758518.1 Emiliania huxleyi CCMP1516 hypothetical protein partial mRNA
CL2620.Contig1_All	4312	-7.39714	1.46043e-38	8.88672e-38	K00284//glutamate synthase (ferredoxin) [EC:1.4.7.1]+ko00910//Nitrogen metabolism+ko00630//Glyoxylate and dicarboxylate metabolism;K00284//glutamate synthase (ferredoxin) [EC:1.4.7.1]+ko00910//Nitrogen metabolism+ko00630//Glyoxylate and dicarboxylate metabolism;K00284//glutamate synthase (ferredoxin) [EC:1.4.7.1]+ko00910//Nitrogen metabolism+ko00630//Glyoxylate and dicarboxylate metabolism;K00284…	PREDICTED: ferredoxin-dependent glutamate synthase, chloroplastic [Brachypodium distachyon] >KQK14861.1 hypothetical protein BRADI_1g19080 [Brachypodium distachyon]	[E] KOG0399 Glutamate synthase	Glutamine amidotransferases class-II	Ferredoxin-dependent glutamate synthase, chloroplastic OS=Spinacia oleracea GN=FdGOGAT PE=1 SV=3			GO:0015930//glutamate synthase activity;GO:0006537//glutamate biosynthetic process;GO:0019676//ammonia assimilation cycle;GO:0005737//cytoplasm
Unigene14471_All	1480	-7.39652	4.26832e-20	1.65502e-19				Double zinc ribbon
Unigene48151_All	1671	-7.39196	1.91449e-38	1.16184e-37	K13172//serine/arginine repetitive matrix protein 2;K00430//peroxidase [EC:1.11.1.7]+ko01100//Metabolic pathways+ko01110//Biosynthesis of secondary metabolites+ko00940//Phenylpropanoid biosynthesis;K00430//peroxidase [EC:1.11.1.7]+ko01100//Metabolic pathways+ko01110//Biosynthesis of secondary metabolites+ko00940//Phenylpropanoid biosynthesis;K18626//trichohyalin;K22020//mucin-19	basic proline-rich protein-like [Helianthus annuus] >OTG10782.1 putative root cap [Helianthus annuus]	[Z] KOG3592 Microtubule-associated proteins	Periplasmic binding protein domain	Splicing factor U2af large subunit A OS=Triticum aestivum GN=U2AF65A PE=2 SV=1
CL4905.Contig2_All	1419	-7.38868	1.92949e-184	3.74602e-183				Myb-like DNA-binding domain		MYB
Unigene28905_All	1023	-7.37692	7.12787e-20	2.7422e-19	K14325//RNA-binding protein with serine-rich domain 1+ko03015//mRNA surveillance pathway+ko03013//RNA transport;K14325//RNA-binding protein with serine-rich domain 1+ko03015//mRNA surveillance pathway+ko03013//RNA transport;K14325//RNA-binding protein with serine-rich domain 1+ko03015//mRNA surveillance pathway+ko03013//RNA transport;K14325//RNA-binding protein with serine-rich domain 1+ko03015//…	Pre mRNA processing protein [Phytophthora megakarya]	[A] KOG1869 Splicing coactivator SRm160/300, subunit SRm300
CL6253.Contig4_All	2419	-7.36622	9.41021e-20	3.60491e-19	K01897//long-chain acyl-CoA synthetase [EC:6.2.1.3]+ko04146//Peroxisome+ko01100//Metabolic pathways+ko00061//Fatty acid biosynthesis+ko01212//Fatty acid metabolism+ko00071//Fatty acid degradation;K01897//long-chain acyl-CoA synthetase [EC:6.2.1.3]+ko04146//Peroxisome+ko01100//Metabolic pathways+ko00061//Fatty acid biosynthesis+ko01212//Fatty acid metabolism+ko00071//Fatty acid degradation;K01897/…	probable long-chain fatty acid coenzyme A ligase [Cyanidioschyzon merolae strain 10D] >BAM80796.1 probable long-chain fatty acid coenzyme A ligase [Cyanidioschyzon merolae strain 10D]	[I] KOG1256 Long-chain acyl-CoA synthetases (AMP-forming)	AMP-binding enzyme	Long chain acyl-CoA synthetase 7, peroxisomal OS=Arabidopsis thaliana GN=LACS7 PE=1 SV=2			GO:0008152//metabolic process;GO:0004467//long-chain fatty acid-CoA ligase activity;GO:0003824//catalytic activity;GO:0102391//decanoate--CoA ligase activity;GO:0016874//ligase activity
Unigene57129_All	1033	-7.36173	1.05662e-19	4.04122e-19				Domain of unknown function (DUF1772)			XM_020377933.1 PREDICTED: Cajanus cajan uncharacterized LOC109813693 (LOC109813693), transcript variant X1, mRNA
Unigene61243_All	1248	-7.35633	1.21436e-19	4.63488e-19	K14325//RNA-binding protein with serine-rich domain 1+ko03015//mRNA surveillance pathway+ko03013//RNA transport			Transcription elongation factor, N-terminal
Unigene16920_All	1988	-7.35633	1.21436e-19	4.63488e-19		hypothetical protein AK812_SmicGene14967 [Symbiodinium microadriaticum]	[A] KOG1869 Splicing coactivator SRm160/300, subunit SRm300	Domain of unknown function (DUF4611)
CL7159.Contig1_All	2209	-7.34801	1.50346e-19	5.72162e-19	K05389//potassium channel subfamily K, other eukaryote;K02184//formin 2;K05389//potassium channel subfamily K, other eukaryote;K05389//potassium channel subfamily K, other eukaryote;K05389//potassium channel subfamily K, other eukaryote	two-pore potassium channel 5-like [Spinacia oleracea] >KNA20622.1 hypothetical protein SOVF_050620 [Spinacia oleracea]	[W] KOG3544 Collagens (type IV and type XIII), and related proteins	Ion channel	Formin-like protein 18 OS=Oryza sativa subsp. japonica GN=FH18 PE=2 SV=1
CL8671.Contig1_All	1404	-7.34293	1.71238e-19	6.50373e-19	K01897//long-chain acyl-CoA synthetase [EC:6.2.1.3]+ko04146//Peroxisome+ko01100//Metabolic pathways+ko00061//Fatty acid biosynthesis+ko01212//Fatty acid metabolism+ko00071//Fatty acid degradation;K01897//long-chain acyl-CoA synthetase [EC:6.2.1.3]+ko04146//Peroxisome+ko01100//Metabolic pathways+ko00061//Fatty acid biosynthesis+ko01212//Fatty acid metabolism+ko00071//Fatty acid degradation;K01897/…	long-chain acyl-CoA synthetase [Galdieria sulphuraria] >EME32573.1 long-chain acyl-CoA synthetase [Galdieria sulphuraria]	[I] KOG1256 Long-chain acyl-CoA synthetases (AMP-forming)	AMP-binding enzyme	Long chain acyl-CoA synthetase 7, peroxisomal OS=Arabidopsis thaliana GN=LACS7 PE=1 SV=2			GO:0008152//metabolic process;GO:0004467//long-chain fatty acid-CoA ligase activity;GO:0003824//catalytic activity;GO:0102391//decanoate--CoA ligase activity;GO:0016874//ligase activity
Unigene25014_All	641	-7.33819	1.93244e-19	7.31775e-19				Protein of unknown function (DUF2852)
CL3790.Contig2_All	617	-7.33453	2.1209e-19	8.0192e-19	K00599//methyltransferase-like protein 6 [EC:2.1.1.-];K00599//methyltransferase-like protein 6 [EC:2.1.1.-];K00599//methyltransferase-like protein 6 [EC:2.1.1.-];K00599//methyltransferase-like protein 6 [EC:2.1.1.-];K00599//methyltransferase-like protein 6 [EC:2.1.1.-]	methyltransferase like 8, partial [Nannochloropsis gaditana CCMP526] >EKU21434.1 methyltransferase like 8, partial [Nannochloropsis gaditana CCMP526]	[R] KOG2361 Predicted methyltransferase				HG975451.1 Solanum pennellii chromosome ch12, complete genome	GO:0008168//methyltransferase activity
CL1066.Contig4_All	2996	-7.32319	3.15513e-150	5.16205e-149
Unigene48261_All	797	-7.31981	3.07884e-19	1.1576e-18		hypothetical protein BVRB_026820, partial [Beta vulgaris subsp. vulgaris]	[A] KOG1869 Splicing coactivator SRm160/300, subunit SRm300	CarD-like/TRCF domain
Unigene57148_All	1519	-7.3096	3.97983e-19	1.48927e-18	K13171//serine/arginine repetitive matrix protein 1+ko03015//mRNA surveillance pathway+ko03013//RNA transport;K13171//serine/arginine repetitive matrix protein 1+ko03015//mRNA surveillance pathway+ko03013//RNA transport;K13171//serine/arginine repetitive matrix protein 1+ko03015//mRNA surveillance pathway+ko03013//RNA transport;K14325//RNA-binding protein with serine-rich domain 1+ko03015//mRNA s…	M6 metalloprotease, partial [Fragilariopsis cylindrus CCMP1102]	[K] LSE0096 H SON DNA-binding protein/negative regulatory element-binding protein	Immune inhibitor A peptidase M6				GO:0008237//metallopeptidase activity
CL9989.Contig2_All	1217	-7.3068	4.2687e-19	1.59509e-18	K02184//formin 2;K02184//formin 2;K19984//exocyst complex component 5;K02184//formin 2;K14325//RNA-binding protein with serine-rich domain 1+ko03015//mRNA surveillance pathway+ko03013//RNA transport	hypothetical protein PPTG_15675 [Phytophthora parasitica INRA-310] >ETI38022.1 hypothetical protein F443_16123 [Phytophthora parasitica P1569] >ETK78236.1 hypothetical protein L915_15669 [Phytophthora parasitica] >ETL31671.1 hypothetical protein L916_15564 [Phytophthora parasitica] >ETL84901.1 hypothetical protein L917_15387 [Phytophthora parasitica] >ETM38084.1 hypothetical protein L914_15519 [P…	[A] KOG0115 RNA-binding protein p54nrb (RRM superfamily)		Formin-like protein 3 OS=Oryza sativa subsp. japonica GN=FH3 PE=2 SV=2
CL4259.Contig1_All	1562	-7.30319	6.47425e-245	1.57487e-243				Protein of unknown function (DUF1997)
Unigene72681_All	744	-7.30119	4.91127e-19	1.83038e-18		hypothetical protein F511_08501 [Dorcoceras hygrometricum]		Protein of unknown function (DUF1049)	DNA-binding protein HU homolog OS=Guillardia theta GN=hup PE=3 SV=1
Unigene21367_All	848	-7.30119	4.91127e-19	1.83038e-18
CL5425.Contig3_All	795	-7.28991	6.50332e-19	2.41359e-18	K02184//formin 2				Formin-like protein 18 OS=Oryza sativa subsp. japonica GN=FH18 PE=2 SV=1
Unigene21802_All	829	-7.27071	1.04434e-18	3.84972e-18	K00254//dihydroorotate dehydrogenase [EC:1.3.5.2]+ko01100//Metabolic pathways+ko00240//Pyrimidine metabolism;K00254//dihydroorotate dehydrogenase [EC:1.3.5.2]+ko01100//Metabolic pathways+ko00240//Pyrimidine metabolism;K00254//dihydroorotate dehydrogenase [EC:1.3.5.2]+ko01100//Metabolic pathways+ko00240//Pyrimidine metabolism;K00254//dihydroorotate dehydrogenase [EC:1.3.5.2]+ko01100//Metabolic pat…	dihydroorotate dehydrogenase [Euglena gracilis]	[F] KOG1436 Dihydroorotate dehydrogenase	Dihydroorotate dehydrogenase	Dihydroorotate dehydrogenase (quinone), mitochondrial OS=Oryza sativa subsp. japonica GN=PYRD PE=2 SV=1			GO:0004152//dihydroorotate dehydrogenase activity;GO:0044205//'de novo' UMP biosynthetic process;GO:0005743//mitochondrial inner membrane;GO:0006207//'de novo' pyrimidine nucleobase biosynthetic process
CL777.Contig2_All	922	-7.27042	1.86791e-205	3.97234e-204				Lectin C-type domain
Unigene72138_All	1318	-7.26322	1.25435e-18	4.6133e-18	K00253//isovaleryl-CoA dehydrogenase [EC:1.3.8.4]+ko00280//Valine, leucine and isoleucine degradation+ko01100//Metabolic pathways;K00253//isovaleryl-CoA dehydrogenase [EC:1.3.8.4]+ko00280//Valine, leucine and isoleucine degradation+ko01100//Metabolic pathways;K00253//isovaleryl-CoA dehydrogenase [EC:1.3.8.4]+ko00280//Valine, leucine and isoleucine degradation+ko01100//Metabolic pathways;K00253//i…	Isobutyryl-CoA dehydrogenase, mitochondrial [Auxenochlorella protothecoides] >KFM25371.1 Isobutyryl-CoA dehydrogenase, mitochondrial [Auxenochlorella protothecoides]	[I] KOG0140 Medium-chain acyl-CoA dehydrogenase	Acyl-CoA dehydrogenase, C-terminal domain	Isovaleryl-CoA dehydrogenase, mitochondrial OS=Oryza sativa subsp. japonica GN=Os05g0125500 PE=2 SV=2			GO:0050660//flavin adenine dinucleotide binding;GO:0003995//acyl-CoA dehydrogenase activity
CL9666.Contig1_All	865	-7.26079	2.14963e-250	5.33603e-249							AC247229.7 Solanum lycopersicum strain Heinz 1706 chromosome 5 clone sle-17g4 map 5, complete sequence
CL6102.Contig2_All	2657	-7.2543	1.36807e-86	1.49926e-85	K00430//peroxidase [EC:1.11.1.7]+ko01100//Metabolic pathways+ko01110//Biosynthesis of secondary metabolites+ko00940//Phenylpropanoid biosynthesis;K00430//peroxidase [EC:1.11.1.7]+ko01100//Metabolic pathways+ko01110//Biosynthesis of secondary metabolites+ko00940//Phenylpropanoid biosynthesis;K12875//apoptotic chromatin condensation inducer in the nucleus+ko03040//Spliceosome+ko03015//mRNA surveill…	hypothetical protein Naga_101468g1, partial [Nannochloropsis gaditana]	[J] KOG2975 Translation initiation factor 3, subunit f (eIF-3f)	PT repeat	Probable pectinesterase/pectinesterase inhibitor 47 OS=Arabidopsis thaliana GN=PME47 PE=2 SV=1			GO:0016021//integral component of membrane
Unigene39125_All	1126	-7.24386	2.00841e-18	7.33396e-18	K06182//23S rRNA pseudouridine2604 synthase [EC:5.4.99.21];K06182//23S rRNA pseudouridine2604 synthase [EC:5.4.99.21]	ribosomal large subunit pseudouridine synthase B [Galdieria sulphuraria] >EME27528.1 ribosomal large subunit pseudouridine synthase B [Galdieria sulphuraria]		RNA pseudouridylate synthase	Putative ribosomal large subunit pseudouridine synthase SVR1, chloroplastic OS=Arabidopsis thaliana GN=SVR1 PE=1 SV=1			GO:0003723//RNA binding;GO:0001522//pseudouridine synthesis;GO:0009982//pseudouridine synthase activity
Unigene76636_All	1944	-7.24132	2.13535e-18	7.79064e-18	K19984//exocyst complex component 5;K02184//formin 2	hypothetical protein BU14_0147s0014 [Porphyra umbilicalis]			Formin-like protein 5 OS=Oryza sativa subsp. japonica GN=FH5 PE=2 SV=2
Unigene40337_All	1033	-7.23408	5.09753e-35	2.88276e-34		primosomal protein N' (replication factor Y) (chromatophore) [Paulinella chromatophora] >ACB43270.1 primosomal protein N' (replication factor Y) (chromatophore) [Paulinella chromatophora]		Pre-toxin domain with VENN motif				GO:0003677//DNA binding;GO:0005524//ATP binding;GO:0006260//DNA replication;GO:0009536//plastid;GO:0004003//ATP-dependent DNA helicase activity
Unigene60875_All	521	-7.23291	5.52447e-41	3.52018e-40				Zinc finger C-x8-C-x5-C-x3-H type (and similar)
Unigene60914_All	1143	-7.22423	3.21989e-18	1.16526e-17	K22314//glucosinolate gamma-glutamyl hydrolase [EC:3.4.19.16]	hypothetical protein AURANDRAFT_71614 [Aureococcus anophagefferens] >EGB08142.1 hypothetical protein AURANDRAFT_71614 [Aureococcus anophagefferens]		META domain				GO:0016021//integral component of membrane
Unigene27270_All	1251	-7.22423	3.21989e-18	1.16526e-17		PREDICTED: alpha-keto acid-binding periplasmic protein TakP-like [Ziziphus jujuba]		Bacterial extracellular solute-binding protein, family 7
CL2989.Contig3_All	2038	-7.20733	4.81419e-18	1.73051e-17				Uncharacterized protein conserved in bacteria (DUF2312)
Unigene32761_All	2457	-7.19931	7.63264e-67	6.90375e-66	K00548//5-methyltetrahydrofolate--homocysteine methyltransferase [EC:2.1.1.13]+ko00670//One carbon pool by folate+ko01230//Biosynthesis of amino acids+ko00450//Selenocompound metabolism+ko01100//Metabolic pathways+ko01110//Biosynthesis of secondary metabolites+ko00270//Cysteine and methionine metabolism;K00548//5-methyltetrahydrofolate--homocysteine methyltransferase [EC:2.1.1.13]+ko00670//One ca…	methionine synthase [Ostreococcus tauri]	[AR] KOG2146 Splicing coactivator SRm160/300, subunit SRm160 (contains PWI domain)	Homocysteine S-methyltransferase	Selenocysteine methyltransferase OS=Astragalus bisulcatus GN=SMTA PE=1 SV=1			GO:0008705//methionine synthase activity;GO:0031419//cobalamin binding;GO:0008270//zinc ion binding;GO:0016021//integral component of membrane;GO:0042558//pteridine-containing compound metabolic process
Unigene77079_All	1647	-7.19861	1.00284e-29	5.06674e-29	K21440//ankyrin repeat domain-containing protein 50	hypothetical protein AM587_10016144 [Phytophthora nicotianae]		Ankyrin repeats (many copies)
Unigene36506_All	603	-7.19609	6.27818e-18	2.24507e-17		FOG: Ankyrin repeat [Plasmopara halstedii]		Ankyrin repeats (many copies)
Unigene3496_All	760	-7.18415	8.30837e-18	2.95301e-17	K10406//kinesin family member C2/C3;K10406//kinesin family member C2/C3;K06636//structural maintenance of chromosome 1;K06675//structural maintenance of chromosome 4	hypothetical protein COLO4_00749 [Corchorus olitorius]	[Z] KOG0516 Dystonin, GAS (Growth-arrest-specific protein), and related proteins	C4-type zinc ribbon domain	Protein CROWDED NUCLEI 3 OS=Arabidopsis thaliana GN=CRWN3 PE=1 SV=1
CL4818.Contig1_All	1835	-7.18415	8.30837e-18	2.95301e-17				Bacterial extracellular solute-binding protein
Unigene20201_All	612	-7.18415	5.36199e-34	2.9685e-33	K02184//formin 2;K20547//basic endochitinase B [EC:3.2.1.14]+ko04016//MAPK signaling pathway - plant+ko00520//Amino sugar and nucleotide sugar metabolism+ko01100//Metabolic pathways;K02184//formin 2;K02184//formin 2	PREDICTED: proline-rich extensin-like protein EPR1 [Capsicum annuum]	[S] KOG4805 Uncharacterized conserved protein	Lysosome-associated membrane glycoprotein (Lamp)	Anther-specific proline-rich protein APG OS=Arabidopsis thaliana GN=APG PE=2 SV=2
Unigene43321_All	2258	-7.1678	4.7424e-161	8.25034e-160	K00030//isocitrate dehydrogenase (NAD+) [EC:1.1.1.41]+ko00020//Citrate cycle (TCA cycle)+ko01230//Biosynthesis of amino acids+ko01100//Metabolic pathways+ko01110//Biosynthesis of secondary metabolites+ko01210//2-Oxocarboxylic acid metabolism+ko01200//Carbon metabolism;K00030//isocitrate dehydrogenase (NAD+) [EC:1.1.1.41]+ko00020//Citrate cycle (TCA cycle)+ko01230//Biosynthesis of amino acids+ko01…	Isocitrate dehydrogenase [NAD] catalytic subunit 5, mitochondrial [Triticum urartu]	[E] KOG0785 Isocitrate dehydrogenase, alpha subunit	Isocitrate/isopropylmalate dehydrogenase	Isocitrate dehydrogenase [NAD] catalytic subunit 6, mitochondrial OS=Arabidopsis thaliana GN=IDH6 PE=1 SV=2			GO:0006099//tricarboxylic acid cycle;GO:0000287//magnesium ion binding;GO:0004449//isocitrate dehydrogenase (NAD+) activity;GO:0051287//NAD binding;GO:0005739//mitochondrion
CL9935.Contig3_All	1864	-7.1641	1.32458e-17	4.67085e-17
Unigene60173_All	5753	-7.16369	2.06075e-65	1.83986e-64	K01968//3-methylcrotonyl-CoA carboxylase alpha subunit [EC:6.4.1.4]+ko00280//Valine, leucine and isoleucine degradation+ko01100//Metabolic pathways;K01968//3-methylcrotonyl-CoA carboxylase alpha subunit [EC:6.4.1.4]+ko00280//Valine, leucine and isoleucine degradation+ko01100//Metabolic pathways;K01968//3-methylcrotonyl-CoA carboxylase alpha subunit [EC:6.4.1.4]+ko00280//Valine, leucine and isoleu…	hypothetical protein F511_02381 [Dorcoceras hygrometricum]	[EI] KOG0540 3-Methylcrotonyl-CoA carboxylase, non-biotin containing subunit/Acetyl-CoA carboxylase carboxyl transferase, subunit beta	Carboxyl transferase domain	Methylcrotonoyl-CoA carboxylase subunit alpha, mitochondrial OS=Oryza sativa subsp. japonica GN=MCCA PE=2 SV=2
Unigene17809_All	1430	-7.16369	1.33727e-17	4.71391e-17	K03086//RNA polymerase primary sigma factor;K03086//RNA polymerase primary sigma factor;K03086//RNA polymerase primary sigma factor;K03086//RNA polymerase primary sigma factor	sigma subunit for chloroplast RNA polymerase [Cyanidioschyzon merolae strain 10D] >BAM82413.1 sigma subunit for chloroplast RNA polymerase [Cyanidioschyzon merolae strain 10D]	[K] LSE1296 A Plastidial RNA polymerase sigma-subunit	Sigma-70 region 2	RNA polymerase sigma factor sigA OS=Arabidopsis thaliana GN=SIGA PE=1 SV=1			GO:0003677//DNA binding;GO:0003700//DNA binding transcription factor activity;GO:0016987//sigma factor activity;GO:0006352//DNA-templated transcription, initiation
Unigene35267_All	1405	-7.16039	1.44326e-17	5.08286e-17
Unigene27829_All	2214	-7.14424	1.05343e-252	2.63334e-251	K01638//malate synthase [EC:2.3.3.9]+ko01100//Metabolic pathways+ko01110//Biosynthesis of secondary metabolites+ko00620//Pyruvate metabolism+ko01200//Carbon metabolism+ko00630//Glyoxylate and dicarboxylate metabolism;K01638//malate synthase [EC:2.3.3.9]+ko01100//Metabolic pathways+ko01110//Biosynthesis of secondary metabolites+ko00620//Pyruvate metabolism+ko01200//Carbon metabolism+ko00630//Glyox…	malate synthase A, partial [Phytophthora parasitica P10297]	[C] KOG1261 Malate synthase	Malate synthase	Malate synthase, glyoxysomal OS=Zea mays GN=LIP PE=2 SV=1		XM_001695580.1 Chlamydomonas reinhardtii malate synthase (MAS1), mRNA	GO:0006099//tricarboxylic acid cycle;GO:0006097//glyoxylate cycle;GO:0004474//malate synthase activity
Unigene43545_All	1014	-7.14293	2.15531e-17	7.52391e-17		PREDICTED: phoH-like protein [Gossypium hirsutum]		OmpA family
Unigene47968_All	951	-7.13334	5.44208e-38	3.27226e-37		hypothetical protein BU14_0159s0008 [Porphyra umbilicalis]
Unigene20749_All	1149	-7.12187	3.47853e-17	1.20568e-16	K08675//ATP-dependent Lon protease [EC:3.4.21.53];K08675//ATP-dependent Lon protease [EC:3.4.21.53];K01338//ATP-dependent Lon protease [EC:3.4.21.53]	bacterial type ATP-dependent Lon protease [Ostreococcus tauri]	[O] KOG2004 Mitochondrial ATP-dependent protease PIM1/LON	Lon protease (S16) C-terminal proteolytic domain	Lon protease homolog 2, peroxisomal OS=Arabidopsis thaliana GN=LON2 PE=2 SV=1			GO:0004252//serine-type endopeptidase activity;GO:0005524//ATP binding;GO:0004176//ATP-dependent peptidase activity;GO:0030163//protein catabolic process
CL6385.Contig1_All	1262	-7.12187	3.47853e-17	1.20568e-16	K22020//mucin-19	hypothetical protein F511_09450 [Dorcoceras hygrometricum]		EPSP synthase (3-phosphoshikimate 1-carboxyvinyltransferase)				GO:0019277//UDP-N-acetylgalactosamine biosynthetic process;GO:0008760//UDP-N-acetylglucosamine 1-carboxyvinyltransferase activity;GO:0009536//plastid
CL5823.Contig2_All	1912	-7.10673	4.89059e-17	1.68535e-16	K03596//GTP-binding protein LepA;K21594//translation factor GUF1, mitochondrial [EC:3.6.5.-];K21594//translation factor GUF1, mitochondrial [EC:3.6.5.-];K21594//translation factor GUF1, mitochondrial [EC:3.6.5.-];K21594//translation factor GUF1, mitochondrial [EC:3.6.5.-]	PREDICTED: translation factor GUF1 homolog, chloroplastic [Camelina sativa]	[J] KOG0462 Elongation factor-type GTP-binding protein	Elongation factor Tu GTP binding domain	Translation factor GUF1 homolog, chloroplastic OS=Arabidopsis thaliana GN=At5g08650 PE=1 SV=2		XM_002507800.1 Micromonas commoda protein-synthesizing GTPase (LEPA), partial mRNA	GO:0006412//translation;GO:0005525//GTP binding;GO:0003924//GTPase activity;GO:0009507//chloroplast
Unigene16612_All	1651	-7.10587	3.77687e-63	3.28473e-62	K07304//peptide-methionine (S)-S-oxide reductase [EC:1.8.4.11];K07305//peptide-methionine (R)-S-oxide reductase [EC:1.8.4.12];K07304//peptide-methionine (S)-S-oxide reductase [EC:1.8.4.11];K07304//peptide-methionine (S)-S-oxide reductase [EC:1.8.4.11];K07304//peptide-methionine (S)-S-oxide reductase [EC:1.8.4.11]	PREDICTED: uncharacterized protein LOC109505286 [Elaeis guineensis]	[O] KOG1635 Peptide methionine sulfoxide reductase	Peptide methionine sulfoxide reductase	Peptide methionine sulfoxide reductase (Fragment) OS=Solanum lycopersicum GN=E4 PE=3 SV=1		XM_019847743.1 PREDICTED: Elaeis guineensis peptide methionine sulfoxide reductase MsrA 3-like (LOC109505286), mRNA	GO:0008113//peptide-methionine (S)-S-oxide reductase activity
CL2136.Contig1_All	1611	-7.10049	5.62194e-17	1.93283e-16		PREDICTED: phenylacetate-coenzyme A ligase-like [Ziziphus jujuba]		AMP-binding enzyme
CL4754.Contig2_All	1402	-7.08509	2.86611e-76	2.85867e-75				HemY protein N-terminus
CL3062.Contig2_All	1377	-7.08229	8.42348e-17	2.87513e-16	K01054//acylglycerol lipase [EC:3.1.1.23]+ko01100//Metabolic pathways+ko00561//Glycerolipid metabolism;K01054//acylglycerol lipase [EC:3.1.1.23]+ko01100//Metabolic pathways+ko00561//Glycerolipid metabolism;K01054//acylglycerol lipase [EC:3.1.1.23]+ko01100//Metabolic pathways+ko00561//Glycerolipid metabolism;K01054//acylglycerol lipase [EC:3.1.1.23]+ko01100//Metabolic pathways+ko00561//Glycerolipi…	hydrolase family protein [Populus trichocarpa] >EEE95933.2 hydrolase family protein [Populus trichocarpa]	[I] KOG1455 Lysophospholipase	Serine aminopeptidase, S33	Caffeoylshikimate esterase OS=Arabidopsis thaliana GN=CSE PE=1 SV=1			GO:0016020//membrane;GO:0016298//lipase activity;GO:0016021//integral component of membrane;GO:0006629//lipid metabolic process
Unigene70185_All	1087	-7.0788	9.09892e-17	3.10184e-16	K22909//zinc finger CCCH domain-containing protein 13	Drug/Metabolite transporter superfamily [Micromonas commoda] >ACO68964.1 Drug/Metabolite transporter superfamily [Micromonas commoda]	[A] KOG1869 Splicing coactivator SRm160/300, subunit SRm300	EamA-like transporter family				GO:0016021//integral component of membrane
Unigene75878_All	1064	-7.0788	9.09892e-17	3.10184e-16	K13171//serine/arginine repetitive matrix protein 1+ko03015//mRNA surveillance pathway+ko03013//RNA transport;K13171//serine/arginine repetitive matrix protein 1+ko03015//mRNA surveillance pathway+ko03013//RNA transport;K14325//RNA-binding protein with serine-rich domain 1+ko03015//mRNA surveillance pathway+ko03013//RNA transport;K14325//RNA-binding protein with serine-rich domain 1+ko03015//mRNA…	aminotransferase, DegT/DnrJ/EryC1/StrS family protein [Bathycoccus prasinos] >CCO15814.1 aminotransferase, DegT/DnrJ/EryC1/StrS family protein [Bathycoccus prasinos]	[R] KOG0118 FOG: RRM domain	DegT/DnrJ/EryC1/StrS aminotransferase family	Serine/arginine-rich splicing factor SR45 OS=Arabidopsis thaliana GN=SR45 PE=1 SV=1			GO:0008483//transaminase activity;GO:0003824//catalytic activity
CL7015.Contig2_All	1390	-7.06562	1.21549e-16	4.12214e-16	K01772//protoporphyrin/coproporphyrin ferrochelatase [EC:4.99.1.1 4.99.1.9]+ko00860//Porphyrin and chlorophyll metabolism+ko01100//Metabolic pathways+ko01110//Biosynthesis of secondary metabolites;K01772//protoporphyrin/coproporphyrin ferrochelatase [EC:4.99.1.1 4.99.1.9]+ko00860//Porphyrin and chlorophyll metabolism+ko01100//Metabolic pathways+ko01110//Biosynthesis of secondary metabolites;K0177…	ferrochelatase, putative, partial [Ricinus communis]	[H] KOG1321 Protoheme ferro-lyase (ferrochelatase)	Ferrochelatase	Ferrochelatase-2, chloroplastic OS=Oryza sativa subsp. japonica GN=Os05g0361200 PE=2 SV=1			GO:0005739//mitochondrion;GO:0004325//ferrochelatase activity;GO:0006783//heme biosynthetic process
Unigene39525_All	719	-7.05677	1.47474e-16	4.98336e-16
Unigene82792_All	659	-7.05677	1.47474e-16	4.98336e-16
Unigene17508_All	1107	-7.05677	1.47474e-16	4.98336e-16	K11717//cysteine desulfurase / selenocysteine lyase [EC:2.8.1.7 4.4.1.16]+ko00450//Selenocompound metabolism+ko01100//Metabolic pathways;K11717//cysteine desulfurase / selenocysteine lyase [EC:2.8.1.7 4.4.1.16]+ko00450//Selenocompound metabolism+ko01100//Metabolic pathways;K11717//cysteine desulfurase / selenocysteine lyase [EC:2.8.1.7 4.4.1.16]+ko00450//Selenocompound metabolism+ko01100//Metabol…	unknown [Picea sitchensis]	[E] KOG1549 Cysteine desulfurase NFS1	Aminotransferase class-V	Cysteine desulfurase 1, chloroplastic OS=Arabidopsis thaliana GN=NFS2 PE=1 SV=1			GO:0006534//cysteine metabolic process;GO:0030170//pyridoxal phosphate binding;GO:0031071//cysteine desulfurase activity
Unigene72088_All	1741	-7.05677	1.47474e-16	4.98336e-16	K14689//solute carrier family 30 (zinc transporter), member 2;K14689//solute carrier family 30 (zinc transporter), member 2;K14689//solute carrier family 30 (zinc transporter), member 2;K14689//solute carrier family 30 (zinc transporter), member 2	hypothetical protein AURANDRAFT_18887 [Aureococcus anophagefferens] >EGB12842.1 hypothetical protein AURANDRAFT_18887 [Aureococcus anophagefferens]	[P] KOG1482 Zn2+ transporter	Cation efflux family	Metal tolerance protein 1 OS=Oryza sativa subsp. japonica GN=MTP1 PE=2 SV=1			GO:0016021//integral component of membrane;GO:0008324//cation transmembrane transporter activity
Unigene3495_All	934	-7.05677	1.47474e-16	4.98336e-16		predicted protein [Physcomitrella patens] >EDQ48553.1 predicted protein, partial [Physcomitrella patens]		Bacterial extracellular solute-binding proteins, family 3				GO:0003949//1-(5-phosphoribosyl)-5-[(5-phosphoribosylamino)methylideneamino]imidazole-4-carboxamide isomerase activity;GO:0000105//histidine biosynthetic process;GO:0016021//integral component of membrane;GO:0000162//tryptophan biosynthetic process;GO:0005737//cytoplasm;GO:0005215//transporter activity
CL5524.Contig1_All	1954	-7.04563	2.62898e-31	1.37652e-30	K00088//IMP dehydrogenase [EC:1.1.1.205]+ko00230//Purine metabolism+ko01100//Metabolic pathways+ko01110//Biosynthesis of secondary metabolites;K00088//IMP dehydrogenase [EC:1.1.1.205]+ko00230//Purine metabolism+ko01100//Metabolic pathways+ko01110//Biosynthesis of secondary metabolites;K00088//IMP dehydrogenase [EC:1.1.1.205]+ko00230//Purine metabolism+ko01100//Metabolic pathways+ko01110//Biosynth…	Inosine-5'-monophosphate dehydrogenase [Dorcoceras hygrometricum]	[F] KOG2550 IMP dehydrogenase/GMP reductase	IMP dehydrogenase / GMP reductase domain	GMP reductase OS=Phytophthora infestans PE=2 SV=1			GO:0046872//metal ion binding;GO:0006177//GMP biosynthetic process;GO:0000166//nucleotide binding;GO:0003938//IMP dehydrogenase activity;GO:0005737//cytoplasm
CL7084.Contig2_All	1115	-7.04407	1.94331e-16	6.54049e-16	K12819//pre-mRNA-processing factor SLU7+ko03040//Spliceosome;K12819//pre-mRNA-processing factor SLU7+ko03040//Spliceosome;K12819//pre-mRNA-processing factor SLU7+ko03040//Spliceosome;K12819//pre-mRNA-processing factor SLU7+ko03040//Spliceosome;K12819//pre-mRNA-processing factor SLU7+ko03040//Spliceosome	conserved unknown protein [Ectocarpus siliculosus]	[A] KOG2560 RNA splicing factor - Slu7p	Pre-mRNA splicing Prp18-interacting factor	Pre-mRNA-splicing factor SLU7 OS=Oryza sativa subsp. japonica GN=Os08g0127700 PE=2 SV=1		XM_009827130.1 Aphanomyces astaci hypothetical protein mRNA
CL348.Contig3_All	1185	-7.04182	2.03979e-16	6.85917e-16	K10664//E3 ubiquitin-protein ligase ATL6/9/15/31/42/55 [EC:2.3.2.27];K11982//E3 ubiquitin-protein ligase RNF115/126 [EC:2.3.2.27];K10664//E3 ubiquitin-protein ligase ATL6/9/15/31/42/55 [EC:2.3.2.27];K10664//E3 ubiquitin-protein ligase ATL6/9/15/31/42/55 [EC:2.3.2.27];K10664//E3 ubiquitin-protein ligase ATL6/9/15/31/42/55 [EC:2.3.2.27]	PREDICTED: RING-H2 finger protein ATL66-like [Ipomoea nil]	[O] KOG0800 FOG: Predicted E3 ubiquitin ligase	Ring finger domain	RING-H2 finger protein ATL66 OS=Arabidopsis thaliana GN=ATL66 PE=2 SV=1
Unigene3478_All	1013	-7.0344	4.25433e-31	2.21843e-30	K00384//thioredoxin reductase (NADPH) [EC:1.8.1.9]+ko00450//Selenocompound metabolism;K00384//thioredoxin reductase (NADPH) [EC:1.8.1.9]+ko00450//Selenocompound metabolism;K00384//thioredoxin reductase (NADPH) [EC:1.8.1.9]+ko00450//Selenocompound metabolism;K00384//thioredoxin reductase (NADPH) [EC:1.8.1.9]+ko00450//Selenocompound metabolism	disulfide oxidoreductase [Dorcoceras hygrometricum]	[O] KOG0404 Thioredoxin reductase	Pyridine nucleotide-disulphide oxidoreductase	Thioredoxin reductase NTRB OS=Oryza sativa subsp. japonica GN=NTRB PE=2 SV=1		FR826594.1 Albugo laibachii Nc14, genomic contig CONTIG_3761_NC14_v4_315_62
Unigene29062_All	1749	-7.0344	2.39373e-16	8.02546e-16				Hint domain
CL2620.Contig3_All	7316	-7.01646	4.22927e-139	6.51028e-138	K00264//glutamate synthase (NADH) [EC:1.4.1.14]+ko00250//Alanine, aspartate and glutamate metabolism+ko00910//Nitrogen metabolism+ko01230//Biosynthesis of amino acids+ko01100//Metabolic pathways+ko01110//Biosynthesis of secondary metabolites;K00284//glutamate synthase (ferredoxin) [EC:1.4.7.1]+ko00910//Nitrogen metabolism+ko00630//Glyoxylate and dicarboxylate metabolism;K00264//glutamate synthase…	glutamate synthase (plastid) [Bangia fuscopurpurea]	[E] KOG0399 Glutamate synthase	Glutamine amidotransferases class-II	Ferredoxin-dependent glutamate synthase OS=Porphyra purpurea GN=gltB PE=3 SV=1		XM_005789630.1 Emiliania huxleyi CCMP1516 hypothetical protein partial mRNA	GO:0097054//L-glutamate biosynthetic process;GO:0006537//glutamate biosynthetic process;GO:0016041//glutamate synthase (ferredoxin) activity;GO:0006541//glutamine metabolic process;GO:0046872//metal ion binding;GO:0015930//glutamate synthase activity;GO:0009570//chloroplast stroma;GO:0009507//chloroplast;GO:0051538//3 iron, 4 sulfur cluster binding
CL209.Contig13_All	1387	-7.01603	3.5476e-16	1.18184e-15	K19219//jumonji domain-containing protein 7;K19219//jumonji domain-containing protein 7	hypothetical protein ACHHYP_01804 [Achlya hypogyna]	[I] KOG2508 Predicted phospholipase	Cupin-like domain
Unigene35446_All	1002	-7.01397	3.70635e-16	1.23348e-15		hypothetical protein Naga_100226g11 [Nannochloropsis gaditana]
CL77.Contig6_All	1922	-7.01352	3.74258e-16	1.24512e-15	K01674//carbonic anhydrase [EC:4.2.1.1]+ko00910//Nitrogen metabolism;K18749//protein LSM14;K11855//ubiquitin carboxyl-terminal hydrolase 36/42 [EC:3.4.19.12];K00430//peroxidase [EC:1.11.1.7]+ko01100//Metabolic pathways+ko01110//Biosynthesis of secondary metabolites+ko00940//Phenylpropanoid biosynthesis;K00430//peroxidase [EC:1.11.1.7]+ko01100//Metabolic pathways+ko01110//Biosynthesis of secondary…	protein arginine N-methyltransferase [Achlya hypogyna]	[C] KOG0559 Dihydrolipoamide succinyltransferase (2-oxoglutarate dehydrogenase, E2 subunit)	Domain of unknown function DUF120	Classical arabinogalactan protein 7 OS=Arabidopsis thaliana GN=AGP7 PE=1 SV=2			GO:0004252//serine-type endopeptidase activity;GO:0046872//metal ion binding;GO:0006508//proteolysis;GO:0005576//extracellular region;GO:0016491//oxidoreductase activity
Unigene58014_All	2519	-7.01054	3.98696e-16	1.32518e-15	K21440//ankyrin repeat domain-containing protein 50	hypothetical protein L915_02900 [Phytophthora parasitica]		Ankyrin repeats (many copies)
Unigene44000_All	1019	-6.99417	5.63469e-16	1.86277e-15				PLAC8 family
Unigene21321_All	436	-6.9886	6.33471e-16	2.08891e-15		beta-ig-h3 fasciclin, partial [Chrysochromulina sp. CCMP291]	[MW] KOG1437 Fasciclin and related adhesion glycoproteins	Fasciclin domain
Unigene32555_All	735	-6.9886	6.33471e-16	2.08891e-15	K09250//cellular nucleic acid-binding protein;K09250//cellular nucleic acid-binding protein;K09250//cellular nucleic acid-binding protein;K09250//cellular nucleic acid-binding protein;K09250//cellular nucleic acid-binding protein	hypothetical protein SOVF_183150 [Spinacia oleracea]	[J] KOG3070 Predicted RNA-binding protein containing PIN domain and invovled in translation or RNA processing	LysR substrate binding domain	Glycine-rich protein 2 OS=Nicotiana sylvestris GN=GRP-2 PE=2 SV=1			GO:0003677//DNA binding;GO:0006355//regulation of transcription, DNA-templated
Unigene44225_All	476	-6.9886	6.33471e-16	2.08891e-15
Unigene43362_All	560	-6.9886	6.33471e-16	2.08891e-15	K11323//histone arginine demethylase JMJD6 [EC:1.14.11.-]	uncharacterized protein DDB_G0271670, partial [Zea mays]	[GO] KOG4157 beta-1,6-N-acetylglucosaminyltransferase, contains WSC domain	MgtE intracellular N domain
Unigene2408_All	880	-6.9886	6.33471e-16	2.08891e-15	K07304//peptide-methionine (S)-S-oxide reductase [EC:1.8.4.11];K09565//peptidyl-prolyl isomerase F (cyclophilin D) [EC:5.2.1.8];K07304//peptide-methionine (S)-S-oxide reductase [EC:1.8.4.11];K07304//peptide-methionine (S)-S-oxide reductase [EC:1.8.4.11]	cyclophilin-type peptidyl-prolyl cis-trans isomerase [Micromonas pusilla CCMP1545] >EEH57047.1 cyclophilin-type peptidyl-prolyl cis-trans isomerase [Micromonas pusilla CCMP1545]	[O] KOG0549 FKBP-type peptidyl-prolyl cis-trans isomerase	FKBP-type peptidyl-prolyl cis-trans isomerase	Peptidyl-prolyl cis-trans isomerase FKBP15-2 OS=Arabidopsis thaliana GN=FKBP15-2 PE=2 SV=2			GO:0006457//protein folding;GO:0003755//peptidyl-prolyl cis-trans isomerase activity;GO:0008113//peptide-methionine (S)-S-oxide reductase activity
Unigene28821_All	905	-6.9886	2.9384e-30	1.50401e-29	K02984//small subunit ribosomal protein S3Ae+ko03010//Ribosome;K02984//small subunit ribosomal protein S3Ae+ko03010//Ribosome;K02984//small subunit ribosomal protein S3Ae+ko03010//Ribosome;K02984//small subunit ribosomal protein S3Ae+ko03010//Ribosome;K02984//small subunit ribosomal protein S3Ae+ko03010//Ribosome	40S ribosomal protein S3a [Phytophthora parasitica INRA-310] >ETI53941.1 40S ribosomal protein S3a [Phytophthora parasitica P1569] >ETK93801.1 40S ribosomal protein S3a [Phytophthora parasitica] >ETL47195.1 40S ribosomal protein S3a [Phytophthora parasitica] >ETM00294.1 40S ribosomal protein S3a [Phytophthora parasitica] >ETM53497.1 40S ribosomal protein S3a [Phytophthora parasitica] >ETN14096.1 …	[J] KOG1628 40S ribosomal protein S3A	Ribosomal S3Ae family	40S ribosomal protein S3a-1 OS=Arabidopsis thaliana GN=RPS3AA PE=1 SV=3			GO:0005829//cytosol;GO:0002181//cytoplasmic translation;GO:0006412//translation;GO:0003735//structural constituent of ribosome;GO:0022627//cytosolic small ribosomal subunit
Unigene1410_All	2164	-6.97887	1.84292e-171	3.36754e-170	K02184//formin 2;K02184//formin 2;K02184//formin 2;K19984//exocyst complex component 5;K02184//formin 2	hydroxyproline-rich glycoprotein DZ-HRGP [Volvox carteri f. nagariensis]	[T] KOG0507 CASK-interacting adaptor protein (caskin) and related proteins with ankyrin repeats and SAM domain	Glutamate-cysteine ligase family 2(GCS2)	Formin-like protein 5 OS=Oryza sativa subsp. japonica GN=FH5 PE=2 SV=2
CL5020.Contig1_All	3391	-6.97683	1.34517e-110	1.76331e-109	K10990//RecQ-mediated genome instability protein 1;K12875//apoptotic chromatin condensation inducer in the nucleus+ko03040//Spliceosome+ko03015//mRNA surveillance pathway+ko03013//RNA transport;K00430//peroxidase [EC:1.11.1.7]+ko01100//Metabolic pathways+ko01110//Biosynthesis of secondary metabolites+ko00940//Phenylpropanoid biosynthesis;K00430//peroxidase [EC:1.11.1.7]+ko01100//Metabolic pathway…	hypothetical protein SDRG_15585 [Saprolegnia diclina VS20] >EQC26647.1 hypothetical protein SDRG_15585 [Saprolegnia diclina VS20]	[T] KOG4743 Cyclin-dependent kinase inhibitor	Concanavalin A-like lectin/glucanases superfamily	Protein TIC 214 OS=Cucumis sativus GN=TIC214 PE=3 SV=2			GO:0004252//serine-type endopeptidase activity;GO:0005576//extracellular region;GO:0016021//integral component of membrane
Unigene35418_All	1304	-6.96514	6.11831e-58	4.98617e-57
Unigene48149_All	634	-6.95327	1.26154e-29	6.3615e-29				Protein of unknown function (DUF3035)
Unigene47927_All	1463	-6.95052	1.41102e-29	7.10737e-29	K12133//MYB-related transcription factor LHY+ko04712//Circadian rhythm - plant;K12133//MYB-related transcription factor LHY+ko04712//Circadian rhythm - plant;K12133//MYB-related transcription factor LHY+ko04712//Circadian rhythm - plant	Transcription factor MYB1R1-like protein [Glycine soja]	[O] KOG0724 Zuotin and related molecular chaperones (DnaJ superfamily), contains DNA-binding domains		Transcription factor MYB1R1 OS=Solanum tuberosum PE=2 SV=1			GO:0003677//DNA binding;GO:0005634//nucleus;GO:0006355//regulation of transcription, DNA-templated;GO:0008270//zinc ion binding;GO:0006351//transcription, DNA-templated
Unigene72923_All	978	-6.9413	1.68665e-15	5.46718e-15				Protein of unknown function (DUF1523)
CL9856.Contig1_All	1312	-6.9336	0	0	K19045//E3 ubiquitin-protein ligase BIG BROTHER and related proteins [EC:2.3.2.27];K19045//E3 ubiquitin-protein ligase BIG BROTHER and related proteins [EC:2.3.2.27];K19045//E3 ubiquitin-protein ligase BIG BROTHER and related proteins [EC:2.3.2.27];K22753//E3 ubiquitin-protein ligase RNF6 [EC:2.3.2.27];K15692//E3 ubiquitin-protein ligase RNF13 [EC:2.3.2.27]	E3 ubiquitin-protein ligase RNF167-like [Zea mays]	[O] KOG0800 FOG: Predicted E3 ubiquitin ligase	Ring finger domain	RING-H2 finger protein ATL33 OS=Arabidopsis thaliana GN=ATL33 PE=2 SV=2
CL10054.Contig2_All	924	-6.92825	2.19948e-15	7.09389e-15				O-antigen ligase like membrane protein
CL1066.Contig11_All	400	-6.92574	2.04418e-29	1.02571e-28
Unigene4546_All	2335	-6.9212	2.537e-15	8.16025e-15				EH_Signature domain
CL2565.Contig1_All	2428	-6.92044	0	0	K01836//phosphoacetylglucosamine mutase [EC:5.4.2.3]+ko00520//Amino sugar and nucleotide sugar metabolism+ko01100//Metabolic pathways;K01836//phosphoacetylglucosamine mutase [EC:5.4.2.3]+ko00520//Amino sugar and nucleotide sugar metabolism+ko01100//Metabolic pathways;K01836//phosphoacetylglucosamine mutase [EC:5.4.2.3]+ko00520//Amino sugar and nucleotide sugar metabolism+ko01100//Metabolic pathwa…	Phosphoacetylglucosamine mutase [Phytophthora megakarya]	[G] KOG2537 Phosphoglucomutase/phosphomannomutase	Phosphoglucomutase/phosphomannomutase, alpha/beta/alpha domain I	Formin-like protein 5 OS=Oryza sativa subsp. japonica GN=FH5 PE=2 SV=2		XM_005843651.1 Chlorella variabilis hypothetical protein (CHLNCDRAFT_140006) mRNA, complete cds	GO:0046872//metal ion binding;GO:0006048//UDP-N-acetylglucosamine biosynthetic process;GO:0005975//carbohydrate metabolic process;GO:0004610//phosphoacetylglucosamine mutase activity
Unigene76128_All	499	-6.91876	2.6651e-15	8.56286e-15
Unigene46750_All	1098	-6.91705	5.45274e-29	2.70788e-28				Z1 domain
Unigene43986_All	1038	-6.91705	2.75863e-15	8.85077e-15	K04773//protease IV [EC:3.4.21.-];K04773//protease IV [EC:3.4.21.-];K04773//protease IV [EC:3.4.21.-];K04773//protease IV [EC:3.4.21.-];K04773//protease IV [EC:3.4.21.-]	hypothetical protein TSUD_281660, partial [Trifolium subterraneum]		Peptidase family S49	Serine protease SPPA, chloroplastic OS=Arabidopsis thaliana GN=SPPA PE=2 SV=1			GO:0008233//peptidase activity;GO:0016021//integral component of membrane;GO:0006465//signal peptide processing
Unigene60483_All	521	-6.89239	4.51913e-15	1.4374e-14	K07766//diphosphoinositol-polyphosphate diphosphatase [EC:3.6.1.52];K07766//diphosphoinositol-polyphosphate diphosphatase [EC:3.6.1.52];K07766//diphosphoinositol-polyphosphate diphosphatase [EC:3.6.1.52];K07766//diphosphoinositol-polyphosphate diphosphatase [EC:3.6.1.52]	hypothetical protein CHLNCDRAFT_33911 [Chlorella variabilis] >EFN59479.1 hypothetical protein CHLNCDRAFT_33911 [Chlorella variabilis]	[T] KOG2839 Diadenosine and diphosphoinositol polyphosphate phosphohydrolase	NUDIX domain				GO:0016787//hydrolase activity
Unigene74647_All	889	-6.89239	4.51913e-15	1.4374e-14		conserved hypothetical protein [Ricinus communis]		SmpA / OmlA family
Unigene17109_All	1422	-6.89239	4.51913e-15	1.4374e-14	K06180//23S rRNA pseudouridine1911/1915/1917 synthase [EC:5.4.99.23];K06180//23S rRNA pseudouridine1911/1915/1917 synthase [EC:5.4.99.23];K06180//23S rRNA pseudouridine1911/1915/1917 synthase [EC:5.4.99.23];K06180//23S rRNA pseudouridine1911/1915/1917 synthase [EC:5.4.99.23]	ribosomal large subunit pseudouridine synthase C [Galdieria sulphuraria] >EME32055.1 ribosomal large subunit pseudouridine synthase C [Galdieria sulphuraria]	[A] KOG1919 RNA pseudouridylate synthases	RNA pseudouridylate synthase	RNA pseudouridine synthase 3, mitochondrial OS=Arabidopsis thaliana GN=At1g78910 PE=2 SV=1			GO:0003723//RNA binding;GO:0001522//pseudouridine synthesis;GO:0009982//pseudouridine synthase activity
Unigene46907_All	2083	-6.89239	1.45239e-28	7.13504e-28				Adenylate and Guanylate cyclase catalytic domain
Unigene8261_All	2751	-6.88872	6.904e-108	8.87005e-107	K01648//ATP citrate (pro-S)-lyase [EC:2.3.3.8]+ko00020//Citrate cycle (TCA cycle)+ko01100//Metabolic pathways+ko01110//Biosynthesis of secondary metabolites;K01648//ATP citrate (pro-S)-lyase [EC:2.3.3.8]+ko00020//Citrate cycle (TCA cycle)+ko01100//Metabolic pathways+ko01110//Biosynthesis of secondary metabolites;K01648//ATP citrate (pro-S)-lyase [EC:2.3.3.8]+ko00020//Citrate cycle (TCA cycle)+ko0…	atp-citrate synthase [Phaeodactylum tricornutum CCAP 1055/1] >EEC48223.1 atp-citrate synthase [Phaeodactylum tricornutum CCAP 1055/1]	[C] KOG1254 ATP-citrate lyase	Citrate synthase, C-terminal domain	ATP-citrate synthase beta chain protein 2 OS=Arabidopsis thaliana GN=ACLB-2 PE=1 SV=1		XM_008608685.1 Saprolegnia diclina VS20 ATP-citrate synthase mRNA	GO:0006101//citrate metabolic process;GO:0006085//acetyl-CoA biosynthetic process;GO:0003878//ATP citrate synthase activity;GO:0046872//metal ion binding;GO:0005524//ATP binding;GO:0048037//cofactor binding;GO:0005737//cytoplasm;GO:0006629//lipid metabolic process
CL2565.Contig2_All	437	-6.88565	4.17682e-135	6.29506e-134
Unigene43098_All	1536	-6.87989	2.37314e-28	1.16079e-27	K13172//serine/arginine repetitive matrix protein 2;K09566//peptidyl-prolyl isomerase G (cyclophilin G) [EC:5.2.1.8];K13171//serine/arginine repetitive matrix protein 1+ko03015//mRNA surveillance pathway+ko03013//RNA transport;K09566//peptidyl-prolyl isomerase G (cyclophilin G) [EC:5.2.1.8];K13171//serine/arginine repetitive matrix protein 1+ko03015//mRNA surveillance pathway+ko03013//RNA transpo…	serine/arginine repetitive matrix protein 1-like isoform X1 [Helianthus annuus]	[K] LSE0096 H SON DNA-binding protein/negative regulatory element-binding protein	Bacterial extracellular solute-binding protein
Unigene28231_All	1053	-6.87361	9.1019e-55	7.13579e-54		PREDICTED: putative SOS response-associated peptidase YoqW [Ziziphus jujuba]	[S] KOG2618 Uncharacterized conserved protein	SOS response associated peptidase (SRAP)
CL9186.Contig2_All	836	-6.87134	6.84958e-15	2.15903e-14	K02184//formin 2	LOW QUALITY PROTEIN: hypothetical protein BU14_0522s0005 [Porphyra umbilicalis]	[H] KOG3754 Gamma-glutamylcysteine synthetase	Glutamate-cysteine ligase			XM_005777446.1 Emiliania huxleyi CCMP1516 hypothetical protein partial mRNA
CL4687.Contig4_All	1101	-6.87008	7.02151e-15	2.21196e-14	K02184//formin 2	hypothetical protein BU14_0312s0014 [Porphyra umbilicalis]	[W] KOG3544 Collagens (type IV and type XIII), and related proteins		CASP-like protein 4A2 OS=Oryza sativa subsp. japonica GN=Os02g0134500 PE=2 SV=2
Unigene46885_All	885	-6.86729	7.4152e-15	2.33332e-14	K08081//tropinone reductase I [EC:1.1.1.206]+ko00960//Tropane, piperidine and pyridine alkaloid biosynthesis+ko01100//Metabolic pathways+ko01110//Biosynthesis of secondary metabolites;K08081//tropinone reductase I [EC:1.1.1.206]+ko00960//Tropane, piperidine and pyridine alkaloid biosynthesis+ko01100//Metabolic pathways+ko01110//Biosynthesis of secondary metabolites;K08081//tropinone reductase I […	predicted protein [Chlamydomonas reinhardtii] >EDP07053.1 predicted protein [Chlamydomonas reinhardtii]	[R] KOG0725 Reductases with broad range of substrate specificities	Enoyl-(Acyl carrier protein) reductase	Zerumbone synthase OS=Zingiber zerumbet GN=ZSD1 PE=1 SV=1			GO:0016491//oxidoreductase activity
Unigene39675_All	1250	-6.86729	3.88064e-28	1.88794e-27	K22020//mucin-19	phosphoglucomutase, putative [Ricinus communis]	[G] KOG1220 Phosphoglucomutase/phosphomannomutase	Phosphoglucomutase/phosphomannomutase, alpha/beta/alpha domain III				GO:0000287//magnesium ion binding;GO:0005975//carbohydrate metabolic process;GO:0016740//transferase activity;GO:0008966//phosphoglucosamine mutase activity;GO:0009536//plastid
CL2615.Contig2_All	1042	-6.86729	7.4152e-15	2.33332e-14	K01259//proline iminopeptidase [EC:3.4.11.5]+ko00330//Arginine and proline metabolism;K01259//proline iminopeptidase [EC:3.4.11.5]+ko00330//Arginine and proline metabolism;K01259//proline iminopeptidase [EC:3.4.11.5]+ko00330//Arginine and proline metabolism;K01259//proline iminopeptidase [EC:3.4.11.5]+ko00330//Arginine and proline metabolism;K01259//proline iminopeptidase [EC:3.4.11.5]+ko00330//A…	hypothetical protein SOVF_199050 [Spinacia oleracea]	[AR] KOG2146 Splicing coactivator SRm160/300, subunit SRm160 (contains PWI domain)	alpha/beta hydrolase fold	Proline iminopeptidase OS=Arabidopsis thaliana GN=PIP PE=2 SV=3
Unigene27803_All	720	-6.86729	3.88064e-28	1.88794e-27		conserved unknown protein [Ectocarpus siliculosus]
Unigene20742_All	1386	-6.86729	7.4152e-15	2.33332e-14		predicted protein [Thalassiosira pseudonana CCMP1335] >EED86352.1 predicted protein [Thalassiosira pseudonana CCMP1335]		Pregnancy-associated plasma protein-A				GO:0008237//metallopeptidase activity
Unigene20620_All	1186	-6.86729	7.4152e-15	2.33332e-14				TonB dependent receptor
CL307.Contig4_All	1547	-6.85968	8.60563e-15	2.70005e-14	K02895//large subunit ribosomal protein L24+ko03010//Ribosome;K02895//large subunit ribosomal protein L24+ko03010//Ribosome	conserved unknown protein [Ectocarpus siliculosus]	[J] KOG1708 Mitochondrial/chloroplast ribosomal protein L24	KOW motif				GO:0005840//ribosome;GO:0006412//translation;GO:0003735//structural constituent of ribosome
Unigene5021_All	2204	-6.85968	8.60563e-15	2.70005e-14	K01191//alpha-mannosidase [EC:3.2.1.24]+ko00511//Other glycan degradation;K01191//alpha-mannosidase [EC:3.2.1.24]+ko00511//Other glycan degradation;K01191//alpha-mannosidase [EC:3.2.1.24]+ko00511//Other glycan degradation;K01191//alpha-mannosidase [EC:3.2.1.24]+ko00511//Other glycan degradation	hypothetical protein CEUSTIGMA_g4048.t1 [Chlamydomonas eustigma]	[G] KOG4342 Alpha-mannosidase	Glycosyl hydrolases family 38 C-terminal domain				GO:0006013//mannose metabolic process;GO:0046872//metal ion binding;GO:0030246//carbohydrate binding;GO:0006517//protein deglycosylation;GO:0004559//alpha-mannosidase activity;GO:0005773//vacuole
Unigene64335_All	2035	-6.85458	6.35078e-28	3.07224e-27	K01958//pyruvate carboxylase [EC:6.4.1.1]+ko00020//Citrate cycle (TCA cycle)+ko01230//Biosynthesis of amino acids+ko01100//Metabolic pathways+ko00620//Pyruvate metabolism+ko01200//Carbon metabolism;K01958//pyruvate carboxylase [EC:6.4.1.1]+ko00020//Citrate cycle (TCA cycle)+ko01230//Biosynthesis of amino acids+ko01100//Metabolic pathways+ko00620//Pyruvate metabolism+ko01200//Carbon metabolism;K01…	pyruvate carboxylase [Volvox carteri f. nagariensis] >EFJ53086.1 pyruvate carboxylase [Volvox carteri f. nagariensis]	[C] KOG0369 Pyruvate carboxylase	Carbamoyl-phosphate synthase L chain, ATP binding domain	Biotin carboxylase, chloroplastic OS=Arabidopsis thaliana GN=CAC2 PE=1 SV=1		JX612965.1 Gossypium hirsutum clone NBRI_GE55724 microsatellite sequence	GO:0004736//pyruvate carboxylase activity;GO:0046872//metal ion binding;GO:0004075//biotin carboxylase activity;GO:0006090//pyruvate metabolic process;GO:0005524//ATP binding;GO:0006094//gluconeogenesis;GO:0009374//biotin binding
Unigene60566_All	954	-6.84176	1.21873e-14	3.79841e-14	K14424//methylsterol monooxygenase 2+ko01100//Metabolic pathways+ko01110//Biosynthesis of secondary metabolites+ko00100//Steroid biosynthesis	hypothetical protein CHLNCDRAFT_142325 [Chlorella variabilis] >EFN58063.1 hypothetical protein CHLNCDRAFT_142325 [Chlorella variabilis]		Fatty acid hydroxylase superfamily				GO:0005506//iron ion binding;GO:0016021//integral component of membrane;GO:0008610//lipid biosynthetic process;GO:0016491//oxidoreductase activity
Unigene24490_All	667	-6.84176	1.21873e-14	3.79841e-14				GH3 auxin-responsive promoter
Unigene24262_All	1671	-6.84176	1.04015e-27	5.01425e-27		extensin-like protein [Zea mays] >prf||2111476A extensin-like domain		Sulphur transport
Unigene38764_All	1771	-6.84176	1.05895e-53	8.19353e-53				SusD family
Unigene39314_All	2076	-6.82882	1.70496e-27	8.16684e-27	K08081//tropinone reductase I [EC:1.1.1.206]+ko00960//Tropane, piperidine and pyridine alkaloid biosynthesis+ko01100//Metabolic pathways+ko01110//Biosynthesis of secondary metabolites;K08081//tropinone reductase I [EC:1.1.1.206]+ko00960//Tropane, piperidine and pyridine alkaloid biosynthesis+ko01100//Metabolic pathways+ko01110//Biosynthesis of secondary metabolites;K08081//tropinone reductase I […	hypothetical protein PAHAL_H00270 [Panicum hallii]	[R] KOG0725 Reductases with broad range of substrate specificities	Enoyl-(Acyl carrier protein) reductase	Tropinone reductase 1 OS=Datura stramonium GN=TR1 PE=1 SV=1			GO:0016491//oxidoreductase activity
Unigene28248_All	548	-6.82882	1.70496e-27	8.16684e-27				Hexapeptide repeat of succinyl-transferase
CL5701.Contig3_All	1760	-6.81786	1.92786e-14	5.95701e-14	K03257//translation initiation factor 4A+ko03013//RNA transport;K03257//translation initiation factor 4A+ko03013//RNA transport;K03257//translation initiation factor 4A+ko03013//RNA transport	ATP-dependent RNA helicase eIF4A [Aphanomyces astaci] >ETV85527.1 ATP-dependent RNA helicase eIF4A [Aphanomyces astaci]	[J] KOG0327 Translation initiation factor 4F, helicase subunit (eIF-4A) and related helicases	DEAD/DEAH box helicase	Eukaryotic initiation factor 4A-2 OS=Arabidopsis thaliana GN=TIF4A-2 PE=1 SV=1		BT031665.1 Phytophthora capsici clone CBOT53-I08 mRNA sequence	GO:0010468//regulation of gene expression;GO:0005524//ATP binding;GO:0004386//helicase activity;GO:0005737//cytoplasm;GO:0003676//nucleic acid binding;GO:0006413//translational initiation;GO:0005730//nucleolus;GO:0004004//ATP-dependent RNA helicase activity;GO:0010501//RNA secondary structure unwinding
Unigene67835_All	998	-6.81576	2.00643e-14	6.19671e-14	K07588//LAO/AO transport system kinase [EC:2.7.-.-];K02184//formin 2;K04733//interleukin-1 receptor-associated kinase 4 [EC:2.7.11.1];K18749//protein LSM14	hypothetical protein PHYSODRAFT_315055 [Phytophthora sojae] >EGZ17908.1 hypothetical protein PHYSODRAFT_315055 [Phytophthora sojae]	[S] TWOG0055 Uncharacterized conserved protein	ArgK protein	Formin-like protein 5 OS=Oryza sativa subsp. japonica GN=FH5 PE=2 SV=2			GO:0005525//GTP binding;GO:0003924//GTPase activity
Unigene32917_All	405	-6.81576	2.00643e-14	6.19671e-14
Unigene64818_All	626	-6.81576	2.00643e-14	6.19671e-14
Unigene63846_All	1289	-6.81576	2.00643e-14	6.19671e-14	K17987//next to BRCA1 gene 1 protein	hypothetical protein Csa_3G236560 [Cucumis sativus]	[GO] KOG4157 beta-1,6-N-acetylglucosaminyltransferase, contains WSC domain	SurA N-terminal domain
Unigene38872_All	1190	-6.81576	2.00643e-14	6.19671e-14		PREDICTED: uncharacterized protein LOC107408079 [Ziziphus jujuba]		3-demethylubiquinone-9 3-methyltransferase
Unigene22352_All	828	-6.81518	0	0
CL4378.Contig1_All	1153	-6.81346	0	0				CoA-binding domain
Unigene36622_All	1128	-6.80919	1.24416e-52	9.4965e-52				Hint domain
Unigene43051_All	1491	-6.80919	2.10776e-103	2.61867e-102				Autoinducer synthase
CL10983.Contig6_All	1408	-6.79649	2.89033e-14	8.86819e-14	K09419//heat shock transcription factor, other eukaryote;K09419//heat shock transcription factor, other eukaryote;K09419//heat shock transcription factor, other eukaryote;K09419//heat shock transcription factor, other eukaryote;K09419//heat shock transcription factor, other eukaryote	hypothetical protein, variant 3 [Phytophthora parasitica] >ETP36496.1 hypothetical protein, variant 3 [Phytophthora parasitica P10297]	[K] KOG0627 Heat shock transcription factor	HSF-type DNA-binding	Heat stress transcription factor B-1 OS=Arabidopsis thaliana GN=HSFB1 PE=2 SV=2	HSF		GO:0005634//nucleus;GO:0043565//sequence-specific DNA binding;GO:0003824//catalytic activity;GO:0003700//DNA binding transcription factor activity
CL1066.Contig10_All	1808	-6.7943	0	0
Unigene36989_All	962	-6.78949	1.71581e-51	1.28849e-50	K08907//light-harvesting complex I chlorophyll a/b binding protein 1+ko00196//Photosynthesis - antenna proteins;K08907//light-harvesting complex I chlorophyll a/b binding protein 1+ko00196//Photosynthesis - antenna proteins;K08907//light-harvesting complex I chlorophyll a/b binding protein 1+ko00196//Photosynthesis - antenna proteins;K08907//light-harvesting complex I chlorophyll a/b binding prot…	protein fucoxanthin chlorophyll a/c protein [Phaeodactylum tricornutum CCAP 1055/1] >EEC46516.1 protein fucoxanthin chlorophyll a/c protein [Phaeodactylum tricornutum CCAP 1055/1]	[C] LSE0391 A Chlorophyll A/B binding protein	Chlorophyll A-B binding protein	Chlorophyll a-b binding protein CP26, chloroplastic OS=Arabidopsis thaliana GN=LHCB5 PE=1 SV=1			GO:0009765//photosynthesis, light harvesting;GO:0009535//chloroplast thylakoid membrane;GO:0016021//integral component of membrane;GO:0016168//chlorophyll binding;GO:0018298//protein-chromophore linkage
Unigene68558_All	998	-6.78929	3.30888e-14	1.01218e-13	K00323//H+-translocating NAD(P) transhydrogenase [EC:1.6.1.2 7.1.1.1]+ko01100//Metabolic pathways+ko00760//Nicotinate and nicotinamide metabolism;K00323//H+-translocating NAD(P) transhydrogenase [EC:1.6.1.2 7.1.1.1]+ko01100//Metabolic pathways+ko00760//Nicotinate and nicotinamide metabolism	hypothetical protein AURANDRAFT_51957 [Aureococcus anophagefferens] >EGB13130.1 hypothetical protein AURANDRAFT_51957 [Aureococcus anophagefferens]	[AR] KOG2146 Splicing coactivator SRm160/300, subunit SRm160 (contains PWI domain)	NAD(P) transhydrogenase beta subunit	Extensin OS=Nicotiana tabacum GN=HRGPNT3 PE=2 SV=1			GO:0006740//NADPH regeneration;GO:0051287//NAD binding;GO:0050661//NADP binding;GO:0016021//integral component of membrane;GO:0005743//mitochondrial inner membrane;GO:0008746//NAD(P)+ transhydrogenase activity;GO:0015992//proton transport;GO:0008750//NAD(P)+ transhydrogenase (AB-specific) activity
Unigene39746_All	864	-6.78929	3.30888e-14	1.01218e-13	K00106//xanthine dehydrogenase/oxidase [EC:1.17.1.4 1.17.3.2]+ko04146//Peroxisome+ko00232//Caffeine metabolism+ko00230//Purine metabolism+ko01100//Metabolic pathways+ko01110//Biosynthesis of secondary metabolites;K00106//xanthine dehydrogenase/oxidase [EC:1.17.1.4 1.17.3.2]+ko04146//Peroxisome+ko00232//Caffeine metabolism+ko00230//Purine metabolism+ko01100//Metabolic pathways+ko01110//Biosynthesi…	xanthine dehydrogenase/oxidase [Amborella trichopoda] >ERN04671.1 hypothetical protein AMTR_s00076p00114100 [Amborella trichopoda]	[F] KOG0430 Xanthine dehydrogenase	[2Fe-2S] binding domain	Xanthine dehydrogenase 1 OS=Arabidopsis thaliana GN=XDH1 PE=1 SV=1			GO:0016614//oxidoreductase activity, acting on CH-OH group of donors;GO:0009055//electron transfer activity;GO:0051537//2 iron, 2 sulfur cluster binding;GO:0005506//iron ion binding;GO:0050660//flavin adenine dinucleotide binding;GO:0004854//xanthine dehydrogenase activity;GO:0016903//oxidoreductase activity, acting on the aldehyde or oxo group of donors;GO:0005829//cytosol;GO:0009115//xanthine c…
CL555.Contig1_All	1215	-6.78929	3.30888e-14	1.01218e-13	K01739//cystathionine gamma-synthase [EC:2.5.1.48]+ko00920//Sulfur metabolism+ko01230//Biosynthesis of amino acids+ko00450//Selenocompound metabolism+ko01100//Metabolic pathways+ko01110//Biosynthesis of secondary metabolites+ko00270//Cysteine and methionine metabolism;K01739//cystathionine gamma-synthase [EC:2.5.1.48]+ko00920//Sulfur metabolism+ko01230//Biosynthesis of amino acids+ko00450//Seleno…	PREDICTED: cystathionine gamma-synthase 1, chloroplastic-like [Camelina sativa]	[E] KOG0053 Cystathionine beta-lyases/cystathionine gamma-synthases	Cys/Met metabolism PLP-dependent enzyme	Probable cystathionine gamma-synthase 2 OS=Arabidopsis thaliana GN=CGS2 PE=3 SV=1			GO:0003824//catalytic activity;GO:0030170//pyridoxal phosphate binding
Unigene58575_All	1545	-6.78929	3.30888e-14	1.01218e-13	K02046//sulfate transport system permease protein+ko00920//Sulfur metabolism+ko02010//ABC transporters;K02046//sulfate transport system permease protein+ko00920//Sulfur metabolism+ko02010//ABC transporters;K02047//sulfate transport system permease protein+ko00920//Sulfur metabolism+ko02010//ABC transporters	hypothetical protein COLO4_01723, partial [Corchorus olitorius]		Binding-protein-dependent transport system inner membrane component	Probable sulfate transport system permease protein cysT OS=Anthoceros formosae GN=cysT PE=2 SV=1			GO:0016021//integral component of membrane;GO:0015419//ATPase-coupled sulfate transmembrane transporter activity;GO:0009507//chloroplast
Unigene31954_All	1292	-6.78929	3.30888e-14	1.01218e-13		hypothetical protein AURANDRAFT_72421, partial [Aureococcus anophagefferens] >EGB04866.1 hypothetical protein AURANDRAFT_72421, partial [Aureococcus anophagefferens]		Radical SAM superfamily
Unigene28282_All	712	-6.78929	7.54557e-27	3.55915e-26				Outer membrane efflux protein
Unigene28328_All	704	-6.78929	3.30888e-14	1.01218e-13	K14325//RNA-binding protein with serine-rich domain 1+ko03015//mRNA surveillance pathway+ko03013//RNA transport;K14325//RNA-binding protein with serine-rich domain 1+ko03015//mRNA surveillance pathway+ko03013//RNA transport;K14325//RNA-binding protein with serine-rich domain 1+ko03015//mRNA surveillance pathway+ko03013//RNA transport;K14325//RNA-binding protein with serine-rich domain 1+ko03015//…	PREDICTED: cytosine deaminase-like [Gossypium hirsutum]		Amidohydrolase family				GO:0003723//RNA binding
Unigene34942_All	1353	-6.78929	3.30888e-14	1.01218e-13	K05607//methylglutaconyl-CoA hydratase [EC:4.2.1.18]+ko00280//Valine, leucine and isoleucine degradation+ko01100//Metabolic pathways;K05607//methylglutaconyl-CoA hydratase [EC:4.2.1.18]+ko00280//Valine, leucine and isoleucine degradation+ko01100//Metabolic pathways;K05607//methylglutaconyl-CoA hydratase [EC:4.2.1.18]+ko00280//Valine, leucine and isoleucine degradation+ko01100//Metabolic pathways;…	hypothetical protein OsI_38843 [Oryza sativa Indica Group]	[I] KOG1679 Enoyl-CoA hydratase	Enoyl-CoA hydratase/isomerase	Peroxisomal fatty acid beta-oxidation multifunctional protein MFP2 OS=Arabidopsis thaliana GN=MFP2 PE=1 SV=1
CL11385.Contig2_All	953	-6.78876	3.34222e-14	1.02212e-13				CheW-like domain
Unigene4278_All	450	-6.7783	4.0642e-14	1.23744e-13
CL11075.Contig7_All	2662	-6.77101	4.65423e-14	1.41346e-13	K12309//beta-galactosidase [EC:3.2.1.23]+ko00600//Sphingolipid metabolism+ko00604//Glycosphingolipid biosynthesis - ganglio series+ko00531//Glycosaminoglycan degradation+ko00511//Other glycan degradation+ko01100//Metabolic pathways+ko00052//Galactose metabolism;K12309//beta-galactosidase [EC:3.2.1.23]+ko00600//Sphingolipid metabolism+ko00604//Glycosphingolipid biosynthesis - ganglio series+ko0053…	PREDICTED: beta-galactosidase 17 [Vitis vinifera] >CBI35958.3 unnamed protein product, partial [Vitis vinifera]	[G] KOG0496 Beta-galactosidase	Glycosyl hydrolases family 35	Beta-galactosidase 17 OS=Arabidopsis thaliana GN=BGAL17 PE=2 SV=1			GO:0004565//beta-galactosidase activity;GO:0005975//carbohydrate metabolic process;GO:0016021//integral component of membrane;GO:0005773//vacuole
Unigene44040_All	585	-6.76233	5.46632e-14	1.65503e-13
CL4428.Contig1_All	825	-6.76233	5.46632e-14	1.65503e-13	K06890//uncharacterized protein;K06890//uncharacterized protein;K06890//uncharacterized protein	Protein lifeguard 1 [Symbiodinium microadriaticum]	[T] KOG2322 N-methyl-D-aspartate receptor glutamate-binding subunit	Inhibitor of apoptosis-promoting Bax1				GO:0016021//integral component of membrane
Unigene36610_All	824	-6.76233	5.46632e-14	1.65503e-13				Xylose isomerase-like TIM barrel
Unigene59293_All	1088	-6.76233	5.46632e-14	1.65503e-13		PREDICTED: outer membrane protein assembly factor BamD [Ricinus communis]		Outer membrane lipoprotein
Unigene72159_All	1059	-6.76233	5.46632e-14	1.65503e-13		Glycine cleavage system transcriptional activator, putative [Ricinus communis]		LysR substrate binding domain				GO:0003677//DNA binding;GO:0006351//transcription, DNA-templated;GO:0003700//DNA binding transcription factor activity
CL1552.Contig1_All	1308	-6.76233	5.46632e-14	1.65503e-13	K09458//3-oxoacyl-[acyl-carrier-protein] synthase II [EC:2.3.1.179]+ko01100//Metabolic pathways+ko00061//Fatty acid biosynthesis+ko01212//Fatty acid metabolism+ko00780//Biotin metabolism;K09458//3-oxoacyl-[acyl-carrier-protein] synthase II [EC:2.3.1.179]+ko01100//Metabolic pathways+ko00061//Fatty acid biosynthesis+ko01212//Fatty acid metabolism+ko00780//Biotin metabolism;K09458//3-oxoacyl-[acyl-c…	3-oxoacyl [Dorcoceras hygrometricum]	[IQ] KOG1394 3-oxoacyl-(acyl-carrier-protein) synthase (I and II)	Beta-ketoacyl synthase, N-terminal domain	3-oxoacyl-[acyl-carrier-protein] synthase II, chloroplastic OS=Arabidopsis thaliana GN=KAS2 PE=1 SV=1			GO:0008152//metabolic process;GO:0016740//transferase activity
Unigene71944_All	1107	-6.73484	9.04644e-14	2.70993e-13	K06911//uncharacterized protein;K06911//uncharacterized protein;K06911//uncharacterized protein;K06911//uncharacterized protein	hypothetical protein F511_04333 [Dorcoceras hygrometricum]	[T] TWOG0254 Pirin	Pirin	Pirin-1 OS=Arabidopsis thaliana GN=PRN1 PE=1 SV=1
Unigene62419_All	922	-6.73484	9.04644e-14	2.70993e-13
Unigene38132_All	980	-6.73484	9.04644e-14	2.70993e-13	K02878//large subunit ribosomal protein L16+ko03010//Ribosome;K02878//large subunit ribosomal protein L16+ko03010//Ribosome;K02878//large subunit ribosomal protein L16+ko03010//Ribosome;K02878//large subunit ribosomal protein L16+ko03010//Ribosome;K02878//large subunit ribosomal protein L16+ko03010//Ribosome	ribosomal protein, partial [Phaeodactylum tricornutum]	[J] KOG3422 Mitochondrial ribosomal protein L16	Ribosomal protein L16p/L10e	50S ribosomal protein L16, chloroplastic OS=Spirogyra maxima GN=rpl16 PE=3 SV=1			GO:0005840//ribosome;GO:0006412//translation;GO:0003735//structural constituent of ribosome;GO:0019843//rRNA binding;GO:0009507//chloroplast
Unigene27635_All	1645	-6.73484	9.04644e-14	2.70993e-13				Immunoglobulin domain
Unigene31986_All	1313	-6.72091	9.15317e-26	4.20572e-25	K02083//allantoate deiminase [EC:3.5.3.9]+ko00230//Purine metabolism;K02083//allantoate deiminase [EC:3.5.3.9]+ko00230//Purine metabolism;K02083//allantoate deiminase [EC:3.5.3.9]+ko00230//Purine metabolism;K02083//allantoate deiminase [EC:3.5.3.9]+ko00230//Purine metabolism;K02083//allantoate deiminase [EC:3.5.3.9]+ko00230//Purine metabolism	PREDICTED: allantoate deiminase [Tarenaya hassleriana]		Peptidase family M20/M25/M40	Allantoate deiminase 2 OS=Glycine max GN=AAH2 PE=1 SV=1			GO:0008152//metabolic process;GO:0016787//hydrolase activity
Unigene36005_All	665	-6.71473	1.14129e-25	5.22858e-25
Unigene6332_All	1050	-6.71417	1.31486e-13	3.91167e-13				PHAX RNA-binding domain
Unigene11923_All	835	-6.71239	1.83096e-09	4.27963e-09	K02184//formin 2;K02184//formin 2;K03006//DNA-directed RNA polymerase II subunit RPB1 [EC:2.7.7.6]+ko03020//RNA polymerase	formin-like protein 5 isoform X2 [Zea mays] >XP_008670539.1 formin-like protein 5 isoform X2 [Zea mays]		Aldehyde dehydrogenase family	Formin-like protein 5 OS=Oryza sativa subsp. japonica GN=FH5 PE=2 SV=2
Unigene39268_All	1190	-6.70683	1.49983e-13	4.45103e-13	K00234//succinate dehydrogenase (ubiquinone) flavoprotein subunit [EC:1.3.5.1]+ko00020//Citrate cycle (TCA cycle)+ko01100//Metabolic pathways+ko00190//Oxidative phosphorylation+ko01110//Biosynthesis of secondary metabolites+ko01200//Carbon metabolism;K00234//succinate dehydrogenase (ubiquinone) flavoprotein subunit [EC:1.3.5.1]+ko00020//Citrate cycle (TCA cycle)+ko01100//Metabolic pathways+ko0019…	hypothetical protein OsI_32585 [Oryza sativa Indica Group]	[C] KOG2403 Succinate dehydrogenase, flavoprotein subunit	FAD binding domain	Succinate dehydrogenase [ubiquinone] flavoprotein subunit 1, mitochondrial OS=Arabidopsis thaliana GN=SDH1-1 PE=1 SV=1			GO:0006099//tricarboxylic acid cycle;GO:0022900//electron transport chain;GO:0050660//flavin adenine dinucleotide binding;GO:0005743//mitochondrial inner membrane;GO:0008177//succinate dehydrogenase (ubiquinone) activity
Unigene10716_All	2360	-6.70235	1.5725e-53	1.215e-52				Regulator of chromosome condensation (RCC1) repeat
Unigene67416_All	2120	-6.69262	2.49881e-25	1.13577e-24	K14325//RNA-binding protein with serine-rich domain 1+ko03015//mRNA surveillance pathway+ko03013//RNA transport;K14325//RNA-binding protein with serine-rich domain 1+ko03015//mRNA surveillance pathway+ko03013//RNA transport;K22020//mucin-19;K14325//RNA-binding protein with serine-rich domain 1+ko03015//mRNA surveillance pathway+ko03013//RNA transport	malate synthase g [Chrysochromulina sp. CCMP291]	[AR] KOG2146 Splicing coactivator SRm160/300, subunit SRm160 (contains PWI domain)	Malate synthase				GO:0006097//glyoxylate cycle;GO:0003723//RNA binding;GO:0004474//malate synthase activity
CL10646.Contig2_All	793	-6.68861	2.07483e-13	6.11583e-13				Septum formation initiator
CL6102.Contig1_All	2815	-6.68787	5.93003e-154	9.88085e-153	K11855//ubiquitin carboxyl-terminal hydrolase 36/42 [EC:3.4.19.12];K00430//peroxidase [EC:1.11.1.7]+ko01100//Metabolic pathways+ko01110//Biosynthesis of secondary metabolites+ko00940//Phenylpropanoid biosynthesis;K03006//DNA-directed RNA polymerase II subunit RPB1 [EC:2.7.7.6]+ko03020//RNA polymerase	hypothetical protein FisN_10Hu218 [Fistulifera solaris]	[J] KOG2975 Translation initiation factor 3, subunit f (eIF-3f)	PT repeat	Non-classical arabinogalactan protein 30 OS=Arabidopsis thaliana GN=AGP30 PE=2 SV=1
CL10319.Contig1_All	1371	-6.68546	2.19402e-13	6.46217e-13	K00948//ribose-phosphate pyrophosphokinase [EC:2.7.6.1]+ko00230//Purine metabolism+ko00030//Pentose phosphate pathway+ko01230//Biosynthesis of amino acids+ko01100//Metabolic pathways+ko01110//Biosynthesis of secondary metabolites+ko01200//Carbon metabolism;K00948//ribose-phosphate pyrophosphokinase [EC:2.7.6.1]+ko00230//Purine metabolism+ko00030//Pentose phosphate pathway+ko01230//Biosynthesis of…	ribose-phosphate pyrophosphokinase [Galdieria sulphuraria] >EME31504.1 ribose-phosphate pyrophosphokinase [Galdieria sulphuraria]	[FE] KOG1448 Ribose-phosphate pyrophosphokinase	N-terminal domain of ribose phosphate pyrophosphokinase	Ribose-phosphate pyrophosphokinase 2, chloroplastic OS=Spinacia oleracea GN=PRS2 PE=2 SV=1			GO:0000287//magnesium ion binding;GO:0004749//ribose phosphate diphosphokinase activity;GO:0009116//nucleoside metabolic process;GO:0009165//nucleotide biosynthetic process;GO:0016301//kinase activity
Unigene74917_All	1209	-6.67826	2.49119e-13	7.31448e-13		catalase/peroxidase [Dorcoceras hygrometricum]		Peroxidase				GO:0006979//response to oxidative stress;GO:0046872//metal ion binding;GO:0020037//heme binding;GO:0004096//catalase activity;GO:0042744//hydrogen peroxide catabolic process
CL6347.Contig3_All	897	-6.67826	2.49119e-13	7.31448e-13	K00573//protein-L-isoaspartate(D-aspartate) O-methyltransferase [EC:2.1.1.77];K00573//protein-L-isoaspartate(D-aspartate) O-methyltransferase [EC:2.1.1.77];K00573//protein-L-isoaspartate(D-aspartate) O-methyltransferase [EC:2.1.1.77];K00573//protein-L-isoaspartate(D-aspartate) O-methyltransferase [EC:2.1.1.77];K00573//protein-L-isoaspartate(D-aspartate) O-methyltransferase [EC:2.1.1.77]	hypothetical protein EMIHUDRAFT_438067 [Emiliania huxleyi CCMP1516] >EOD09850.1 hypothetical protein EMIHUDRAFT_438067 [Emiliania huxleyi CCMP1516]	[O] KOG1661 Protein-L-isoaspartate(D-aspartate) O-methyltransferase	Protein-L-isoaspartate(D-aspartate) O-methyltransferase (PCMT)				GO:0004719//protein-L-isoaspartate (D-aspartate) O-methyltransferase activity;GO:0016021//integral component of membrane
CL7822.Contig3_All	1623	-6.67595	2.5946e-13	7.60912e-13	K01904//4-coumarate--CoA ligase [EC:6.2.1.12]+ko00130//Ubiquinone and other terpenoid-quinone biosynthesis+ko01100//Metabolic pathways+ko01110//Biosynthesis of secondary metabolites+ko00940//Phenylpropanoid biosynthesis+ko00360//Phenylalanine metabolism;K01904//4-coumarate--CoA ligase [EC:6.2.1.12]+ko00130//Ubiquinone and other terpenoid-quinone biosynthesis+ko01100//Metabolic pathways+ko01110//B…	4-coumarate-coa ligase, partial [Thalassiosira pseudonana CCMP1335] >EED93473.1 4-coumarate-coa ligase, partial [Thalassiosira pseudonana CCMP1335]	[I] KOG1176 Acyl-CoA synthetase	AMP-binding enzyme	4-coumarate--CoA ligase 2 OS=Nicotiana tabacum GN=4CL2 PE=1 SV=1		EU971099.1 Zea mays clone 357469 mRNA sequence	GO:0016207//4-coumarate-CoA ligase activity;GO:0008152//metabolic process;GO:0003824//catalytic activity
Unigene12521_All	1247	-6.65788	2.6482e-18	9.61939e-18				Ankyrin repeat
Unigene16559_All	565	-6.64911	1.13463e-24	5.06505e-24				Domain of unknown function (DUF4864)
Unigene36440_All	640	-6.64911	4.14556e-13	1.20467e-12				RAM signalling pathway protein
Unigene66976_All	1528	-6.64911	1.18626e-47	8.3995e-47	K09250//cellular nucleic acid-binding protein;K09250//cellular nucleic acid-binding protein;K14491//two-component response regulator ARR-B family+ko04075//Plant hormone signal transduction;K09250//cellular nucleic acid-binding protein;K09250//cellular nucleic acid-binding protein	hypothetical protein SOVF_183150 [Spinacia oleracea]	[J] KOG3070 Predicted RNA-binding protein containing PIN domain and invovled in translation or RNA processing	Response regulator receiver domain	Glycine-rich protein 2 OS=Nicotiana sylvestris GN=GRP-2 PE=2 SV=1			GO:0000155//phosphorelay sensor kinase activity;GO:0016849//phosphorus-oxygen lyase activity;GO:0005216//ion channel activity;GO:0009190//cyclic nucleotide biosynthetic process;GO:0005622//intracellular;GO:0016021//integral component of membrane
Unigene64545_All	1247	-6.64911	4.14556e-13	1.20467e-12	K22020//mucin-19;K13171//serine/arginine repetitive matrix protein 1+ko03015//mRNA surveillance pathway+ko03013//RNA transport;K12900//FUS-interacting serine-arginine-rich protein 1+ko03040//Spliceosome;K13171//serine/arginine repetitive matrix protein 1+ko03015//mRNA surveillance pathway+ko03013//RNA transport	hypothetical protein AURANDRAFT_71291, partial [Aureococcus anophagefferens] >EGB09872.1 hypothetical protein AURANDRAFT_71291, partial [Aureococcus anophagefferens]	[A] KOG1869 Splicing coactivator SRm160/300, subunit SRm300	Periplasmic binding protein domain
Unigene62438_All	1259	-6.64911	4.14556e-13	1.20467e-12				Transposase, Mutator family
CL2298.Contig3_All	723	-6.6467	1.07938e-29	5.45124e-29	K02184//formin 2;K02184//formin 2;K02184//formin 2;K14325//RNA-binding protein with serine-rich domain 1+ko03015//mRNA surveillance pathway+ko03013//RNA transport;K14325//RNA-binding protein with serine-rich domain 1+ko03015//mRNA surveillance pathway+ko03013//RNA transport	predicted protein [Micromonas commoda] >ACO61894.1 predicted protein [Micromonas commoda]	[E] KOG2455 Delta-1-pyrroline-5-carboxylate dehydrogenase		Formin-like protein 8 OS=Oryza sativa subsp. japonica GN=FH8 PE=2 SV=1			GO:0004657//proline dehydrogenase activity;GO:0016021//integral component of membrane;GO:0010133//proline catabolic process to glutamate;GO:0003700//DNA binding transcription factor activity;GO:0003842//1-pyrroline-5-carboxylate dehydrogenase activity
CL23.Contig1_All	2957	-6.6441	4.52132e-13	1.31088e-12				CHASE4 domain
Unigene36823_All	2178	-6.63729	1.78874e-115	2.42799e-114	K06041//arabinose-5-phosphate isomerase [EC:5.3.1.13]+ko01100//Metabolic pathways;K06041//arabinose-5-phosphate isomerase [EC:5.3.1.13]+ko01100//Metabolic pathways;K06041//arabinose-5-phosphate isomerase [EC:5.3.1.13]+ko01100//Metabolic pathways	hypothetical protein SELMODRAFT_75684 [Selaginella moellendorffii] >EFJ37869.1 hypothetical protein SELMODRAFT_75684 [Selaginella moellendorffii]		SIS domain	Probable arabinose 5-phosphate isomerase OS=Arabidopsis thaliana GN=SETH3 PE=2 SV=1			GO:1901135//carbohydrate derivative metabolic process;GO:0097367//carbohydrate derivative binding;GO:0016853//isomerase activity;GO:0005975//carbohydrate metabolic process
Unigene76572_All	1709	-6.63462	5.32428e-13	1.53803e-12	K04733//interleukin-1 receptor-associated kinase 4 [EC:2.7.11.1];K04733//interleukin-1 receptor-associated kinase 4 [EC:2.7.11.1];K04733//interleukin-1 receptor-associated kinase 4 [EC:2.7.11.1];K04733//interleukin-1 receptor-associated kinase 4 [EC:2.7.11.1];K04733//interleukin-1 receptor-associated kinase 4 [EC:2.7.11.1]	predicted protein [Bathycoccus prasinos] >CCO19721.1 predicted protein [Bathycoccus prasinos]	[PT] KOG2353 L-type voltage-dependent Ca2+ channel, alpha2/delta subunit	von Willebrand factor type A domain				GO:0005524//ATP binding;GO:0004672//protein kinase activity;GO:0016021//integral component of membrane
CL5104.Contig2_All	830	-6.63164	5.60356e-13	1.61711e-12		conserved hypothetical protein [Ricinus communis]		Bacterial flagellin N-terminal helical region
CL10778.Contig4_All	2136	-6.63134	1.13325e-10	2.86484e-10	K02132//F-type H+-transporting ATPase subunit alpha+ko01100//Metabolic pathways+ko00190//Oxidative phosphorylation;K02132//F-type H+-transporting ATPase subunit alpha+ko01100//Metabolic pathways+ko00190//Oxidative phosphorylation;K02132//F-type H+-transporting ATPase subunit alpha+ko01100//Metabolic pathways+ko00190//Oxidative phosphorylation;K02132//F-type H+-transporting ATPase subunit alpha+ko…	PREDICTED: uncharacterized protein LOC101255871 [Solanum lycopersicum]	[C] KOG1353 F0F1-type ATP synthase, alpha subunit	ATP synthase alpha/beta family, nucleotide-binding domain	ATP synthase subunit alpha, mitochondrial OS=Glycine max GN=ATPA PE=3 SV=1		XM_004253314.1 PREDICTED: Solanum lycopersicum ATP synthase subunit alpha (LOC101255871), mRNA	GO:0015986//ATP synthesis coupled proton transport;GO:0045261//proton-transporting ATP synthase complex, catalytic core F(1);GO:0005524//ATP binding;GO:0005739//mitochondrion;GO:0046933//proton-transporting ATP synthase activity, rotational mechanism
Unigene24075_All	2070	-6.6259	3.23399e-116	4.40658e-115	K14007//protein transport protein SEC24+ko04141//Protein processing in endoplasmic reticulum;K13171//serine/arginine repetitive matrix protein 1+ko03015//mRNA surveillance pathway+ko03013//RNA transport;K00430//peroxidase [EC:1.11.1.7]+ko01100//Metabolic pathways+ko01110//Biosynthesis of secondary metabolites+ko00940//Phenylpropanoid biosynthesis;K14325//RNA-binding protein with serine-rich domai…	predicted protein [Phaeodactylum tricornutum CCAP 1055/1] >EEC48235.1 predicted protein [Phaeodactylum tricornutum CCAP 1055/1]	[W] KOG3544 Collagens (type IV and type XIII), and related proteins	Ornithine cyclodeaminase/mu-crystallin family				GO:0016639//oxidoreductase activity, acting on the CH-NH2 group of donors, NAD or NADP as acceptor;GO:0005737//cytoplasm;GO:0008473//ornithine cyclodeaminase activity
Unigene28342_All	299	-6.61937	6.91174e-13	1.98404e-12
Unigene58399_All	734	-6.61937	6.91174e-13	1.98404e-12		ATP synthase subunits region ORF, putative [Ricinus communis]		L,D-transpeptidase catalytic domain
Unigene28783_All	635	-6.61937	6.91174e-13	1.98404e-12				gag-polyprotein putative aspartyl protease
CL8756.Contig1_All	981	-6.61937	6.91174e-13	1.98404e-12	K00253//isovaleryl-CoA dehydrogenase [EC:1.3.8.4]+ko00280//Valine, leucine and isoleucine degradation+ko01100//Metabolic pathways;K00253//isovaleryl-CoA dehydrogenase [EC:1.3.8.4]+ko00280//Valine, leucine and isoleucine degradation+ko01100//Metabolic pathways;K00253//isovaleryl-CoA dehydrogenase [EC:1.3.8.4]+ko00280//Valine, leucine and isoleucine degradation+ko01100//Metabolic pathways;K00253//i…	hypothetical protein PAHAL_C01178 [Panicum hallii]	[EI] KOG0141 Isovaleryl-CoA dehydrogenase	Acyl-CoA dehydrogenase, N-terminal domain	Isovaleryl-CoA dehydrogenase, mitochondrial OS=Oryza sativa subsp. japonica GN=Os05g0125500 PE=2 SV=2			GO:0005759//mitochondrial matrix;GO:0006552//leucine catabolic process;GO:0005524//ATP binding;GO:0050660//flavin adenine dinucleotide binding;GO:0008470//isovaleryl-CoA dehydrogenase activity
Unigene47263_All	767	-6.61937	6.91174e-13	1.98404e-12	K01955//carbamoyl-phosphate synthase large subunit [EC:6.3.5.5]+ko00250//Alanine, aspartate and glutamate metabolism+ko01100//Metabolic pathways+ko00240//Pyrimidine metabolism;K01955//carbamoyl-phosphate synthase large subunit [EC:6.3.5.5]+ko00250//Alanine, aspartate and glutamate metabolism+ko01100//Metabolic pathways+ko00240//Pyrimidine metabolism;K01955//carbamoyl-phosphate synthase large subu…	ADP-forming, carbamate-phosphorylating [Medicago sativa]	[R] KOG0370 Multifunctional pyrimidine synthesis protein CAD (includes carbamoyl-phophate synthetase, aspartate transcarbamylase, and glutamine amidotransferase)	Carbamoyl-phosphate synthase L chain, ATP binding domain	Carbamoyl-phosphate synthase large chain, chloroplastic OS=Arabidopsis thaliana GN=CARB PE=1 SV=1		XM_010694055.2 PREDICTED: Beta vulgaris subsp. vulgaris carbamoyl-phosphate synthase large chain, chloroplastic (LOC104905490), mRNA	GO:0006807//nitrogen compound metabolic process;GO:0046872//metal ion binding;GO:0005524//ATP binding
Unigene47847_All	1088	-6.61937	6.91174e-13	1.98404e-12		hypothetical protein BU14_0249s0013 [Porphyra umbilicalis]		Bacterial signalling protein N terminal repeat
Unigene20713_All	733	-6.61937	6.91174e-13	1.98404e-12	K20715//phototropin [EC:2.7.11.1];K20715//phototropin [EC:2.7.11.1];K20715//phototropin [EC:2.7.11.1];K20715//phototropin [EC:2.7.11.1]	putative LOV domain-containing protein [Cannabis sativa]		PAS domain	Protein TWIN LOV 1 OS=Arabidopsis thaliana GN=TLP1 PE=1 SV=2			GO:0000155//phosphorelay sensor kinase activity;GO:0005622//intracellular
Unigene17548_All	1478	-6.61334	7.65753e-13	2.19318e-12	K11490//condensin-2 complex subunit H2;K11490//condensin-2 complex subunit H2;K11490//condensin-2 complex subunit H2	condensin-2 complex subunit H2, putative [Phytophthora infestans T30-4] >EEY67220.1 condensin-2 complex subunit H2, putative [Phytophthora infestans T30-4]	[S] KOG2359 Uncharacterized conserved protein	Condensin II complex subunit CAP-H2 or CNDH2, C-term	Formin-like protein 5 OS=Oryza sativa subsp. japonica GN=FH5 PE=2 SV=2			GO:0030261//chromosome condensation
CL1066.Contig5_All	2554	-6.60991	1.48444e-172	2.72654e-171
Unigene32744_All	1263	-6.60426	5.19415e-24	2.27719e-23	K00639//glycine C-acetyltransferase [EC:2.3.1.29]+ko00260//Glycine, serine and threonine metabolism;K00652//8-amino-7-oxononanoate synthase [EC:2.3.1.47]+ko01100//Metabolic pathways+ko00780//Biotin metabolism;K00639//glycine C-acetyltransferase [EC:2.3.1.29]+ko00260//Glycine, serine and threonine metabolism;K00654//serine palmitoyltransferase [EC:2.3.1.50]+ko00600//Sphingolipid metabolism+ko01100…	hypothetical protein PHYSODRAFT_260433 [Phytophthora sojae] >EGZ28560.1 hypothetical protein PHYSODRAFT_260433 [Phytophthora sojae]	[E] KOG1359 Glycine C-acetyltransferase/2-amino-3-ketobutyrate-CoA ligase	Aminotransferase class I and II	Long chain base biosynthesis protein 1 OS=Arabidopsis thaliana GN=LCB1 PE=1 SV=1			GO:0009058//biosynthetic process;GO:0016746//transferase activity, transferring acyl groups;GO:0003824//catalytic activity;GO:0006567//threonine catabolic process;GO:0008890//glycine C-acetyltransferase activity;GO:0030170//pyridoxal phosphate binding;GO:0016874//ligase activity
Unigene72458_All	1939	-6.60426	5.19415e-24	2.27719e-23	K03934//NADH dehydrogenase (ubiquinone) Fe-S protein 1 [EC:7.1.1.2 1.6.99.3]+ko01100//Metabolic pathways+ko00190//Oxidative phosphorylation;K03934//NADH dehydrogenase (ubiquinone) Fe-S protein 1 [EC:7.1.1.2 1.6.99.3]+ko01100//Metabolic pathways+ko00190//Oxidative phosphorylation	PREDICTED: putative formate dehydrogenase YrhE, partial [Ricinus communis] >EEF26352.1 formate dehydrogenase, putative, partial [Ricinus communis]	[C] KOG2282 NADH-ubiquinone oxidoreductase, NDUFS1/75 kDa subunit	Molybdopterin oxidoreductase	NADH dehydrogenase [ubiquinone] flavoprotein 1, mitochondrial OS=Arabidopsis thaliana GN=At5g08530 PE=1 SV=1			GO:0015942//formate metabolic process;GO:0009055//electron transfer activity;GO:0042773//ATP synthesis coupled electron transport;GO:0051536//iron-sulfur cluster binding;GO:0006979//response to oxidative stress;GO:0005747//mitochondrial respiratory chain complex I;GO:0008863//formate dehydrogenase (NAD+) activity;GO:0008137//NADH dehydrogenase (ubiquinone) activity;GO:0009507//chloroplast
CL5819.Contig2_All	1029	-6.59726	1.00504e-12	2.8599e-12	K02184//formin 2;K19984//exocyst complex component 5;K02184//formin 2;K05747//Wiskott-Aldrich syndrome protein+ko04144//Endocytosis;K04733//interleukin-1 receptor-associated kinase 4 [EC:2.7.11.1]	hypothetical protein BU14_0377s0005 [Porphyra umbilicalis]	[TZ] KOG3671 Actin regulatory protein (Wiskott-Aldrich syndrome protein)	Autophagy-related protein 11	Vegetative cell wall protein gp1 OS=Chlamydomonas reinhardtii GN=GP1 PE=1 SV=1
CL5783.Contig7_All	1233	-6.59573	1.03118e-12	2.93262e-12		conserved unknown protein [Ectocarpus siliculosus]		Ubiquitin family
CL4011.Contig3_All	1080	-6.58991	1.13694e-12	3.22601e-12	K08857//NIMA (never in mitosis gene a)-related kinase 1/4/5 [EC:2.7.11.1];K08857//NIMA (never in mitosis gene a)-related kinase 1/4/5 [EC:2.7.11.1];K08857//NIMA (never in mitosis gene a)-related kinase 1/4/5 [EC:2.7.11.1];K08857//NIMA (never in mitosis gene a)-related kinase 1/4/5 [EC:2.7.11.1]	NEK protein kinase [Saprolegnia parasitica CBS 223.65] >KDO34413.1 NEK protein kinase [Saprolegnia parasitica CBS 223.65]	[D] KOG0591 NIMA (never in mitosis)-related G2-specific serine/threonine protein kinase	Protein kinase domain	Serine/threonine-protein kinase RUNKEL OS=Arabidopsis thaliana GN=RUK PE=1 SV=1			GO:0004674//protein serine/threonine kinase activity;GO:0005524//ATP binding;GO:0004672//protein kinase activity
Unigene74336_All	907	-6.58899	1.15461e-12	3.27223e-12	K07513//acetyl-CoA acyltransferase 1 [EC:2.3.1.16]+ko04146//Peroxisome+ko00280//Valine, leucine and isoleucine degradation+ko00592//alpha-Linolenic acid metabolism+ko01100//Metabolic pathways+ko01110//Biosynthesis of secondary metabolites+ko01212//Fatty acid metabolism+ko01040//Biosynthesis of unsaturated fatty acids+ko00071//Fatty acid degradation;K07513//acetyl-CoA acyltransferase 1 [EC:2.3.1.1…	predicted protein [Phaeodactylum tricornutum CCAP 1055/1] >EEC48497.1 predicted protein [Phaeodactylum tricornutum CCAP 1055/1]	[I] KOG1391 Acetyl-CoA acetyltransferase	Thiolase, N-terminal domain	3-ketoacyl-CoA thiolase 2, peroxisomal OS=Arabidopsis thaliana GN=PED1 PE=1 SV=2			GO:0008152//metabolic process;GO:0016747//transferase activity, transferring acyl groups other than amino-acyl groups
Unigene67495_All	921	-6.58899	1.15461e-12	3.27223e-12
Unigene9775_All	508	-6.58899	1.15461e-12	3.27223e-12	K13118//protein DGCR14;K21440//ankyrin repeat domain-containing protein 50;K21440//ankyrin repeat domain-containing protein 50	hypothetical protein GPECTOR_13g662 [Gonium pectorale]	[M] KOG4177 Ankyrin	Ankyrin repeats (3 copies)	Probable E3 ubiquitin-protein ligase XBOS36 OS=Oryza sativa subsp. japonica GN=XBOS36 PE=2 SV=1			GO:0031514//motile cilium
Unigene28331_All	701	-6.58899	1.15461e-12	3.27223e-12		lytic transglycosylase, putative [Ricinus communis]		Transglycosylase SLT domain
Unigene3399_All	937	-6.58899	1.15461e-12	3.27223e-12		hypothetical protein FisN_12Lh136 [Fistulifera solaris]		Sulfotransferase family
Unigene47329_All	1079	-6.58899	1.15461e-12	3.27223e-12	K16871//4-aminobutyrate---pyruvate transaminase [EC:2.6.1.96]+ko00250//Alanine, aspartate and glutamate metabolism+ko01100//Metabolic pathways+ko00650//Butanoate metabolism;K16871//4-aminobutyrate---pyruvate transaminase [EC:2.6.1.96]+ko00250//Alanine, aspartate and glutamate metabolism+ko01100//Metabolic pathways+ko00650//Butanoate metabolism;K16871//4-aminobutyrate---pyruvate transaminase [EC:2…	aminotransferase-like protein [Arabidopsis thaliana]	[E] KOG1404 Alanine-glyoxylate aminotransferase AGT2	Aminotransferase class-III	Gamma-aminobutyrate transaminase POP2, mitochondrial OS=Arabidopsis thaliana GN=POP2 PE=1 SV=1			GO:0006105//succinate metabolic process;GO:0010154//fruit development;GO:0009865//pollen tube adhesion;GO:0009860//pollen tube growth;GO:0006020//inositol metabolic process;GO:0102351//gamma-aminobutyrate transaminase (glyoxylate dependent) activity;GO:0006541//glutamine metabolic process;GO:0010033//response to organic substance;GO:0009651//response to salt stress;GO:0008270//zinc ion binding;GO…
Unigene16838_All	651	-6.58899	1.15461e-12	3.27223e-12
CL9317.Contig1_All	507	-6.58899	1.15461e-12	3.27223e-12
CL10592.Contig5_All	911	-6.58838	1.16655e-12	3.30511e-12
CL1752.Contig4_All	2800	-6.58759	0	0	K13172//serine/arginine repetitive matrix protein 2;K13171//serine/arginine repetitive matrix protein 1+ko03015//mRNA surveillance pathway+ko03013//RNA transport	hypothetical protein AXX17_ATUG03430 [Arabidopsis thaliana]	[AR] KOG2146 Splicing coactivator SRm160/300, subunit SRm160 (contains PWI domain)	Bacterial extracellular solute-binding protein	Formin-like protein 6 OS=Oryza sativa subsp. japonica GN=FH6 PE=2 SV=2
Unigene32057_All	910	-6.57356	1.43869e-23	6.22996e-23	K00297//methylenetetrahydrofolate reductase (NADPH) [EC:1.5.1.20]+ko00670//One carbon pool by folate+ko01100//Metabolic pathways+ko01200//Carbon metabolism;K00297//methylenetetrahydrofolate reductase (NADPH) [EC:1.5.1.20]+ko00670//One carbon pool by folate+ko01100//Metabolic pathways+ko01200//Carbon metabolism;K00297//methylenetetrahydrofolate reductase (NADPH) [EC:1.5.1.20]+ko00670//One carbon p…	5,10-methylenetetrahydrofolate reductase [Ostreococcus tauri]	[K] KOG0260 RNA polymerase II, large subunit	Methylenetetrahydrofolate reductase	Methylenetetrahydrofolate reductase 1 OS=Arabidopsis thaliana GN=MTHFR1 PE=1 SV=1			GO:0005829//cytosol;GO:0004489//methylenetetrahydrofolate reductase (NAD(P)H) activity;GO:0035999//tetrahydrofolate interconversion;GO:0009086//methionine biosynthetic process
CL5078.Contig2_All	1208	-6.5717	1.5403e-12	4.33294e-12	K02045//sulfate transport system ATP-binding protein [EC:3.6.3.25]+ko00920//Sulfur metabolism+ko02010//ABC transporters;K02045//sulfate transport system ATP-binding protein [EC:3.6.3.25]+ko00920//Sulfur metabolism+ko02010//ABC transporters;K02045//sulfate transport system ATP-binding protein [EC:3.6.3.25]+ko00920//Sulfur metabolism+ko02010//ABC transporters	hypothetical protein AXX17_ATUG04510 [Arabidopsis thaliana]	[Q] KOG0055 Multidrug/pheromone exporter, ABC superfamily	ABC transporter	Protein TRIGALACTOSYLDIACYLGLYCEROL 3, chloroplastic OS=Arabidopsis thaliana GN=TGD3 PE=1 SV=1			GO:0005524//ATP binding;GO:0015833//peptide transport;GO:0016887//ATPase activity
Unigene35563_All	1572	-6.57162	5.66661e-176	1.05682e-174	K03320//ammonium transporter, Amt family;K03320//ammonium transporter, Amt family;K03320//ammonium transporter, Amt family;K03320//ammonium transporter, Amt family;K03320//ammonium transporter, Amt family	Ammonium transporter [Ectocarpus siliculosus]	[P] KOG0682 Ammonia permease	Ammonium Transporter Family	Ammonium transporter 1 member 2 OS=Arabidopsis thaliana GN=AMT1-2 PE=1 SV=1			GO:0008519//ammonium transmembrane transporter activity;GO:0016021//integral component of membrane
Unigene7545_All	894	-6.56547	1.70756e-12	4.79206e-12
Unigene47204_All	637	-6.55797	1.93262e-12	5.40595e-12		hypothetical protein THAOC_00073 [Thalassiosira oceanica]		LsmAD domain				GO:0016021//integral component of membrane
Unigene32644_All	715	-6.55797	1.93262e-12	5.40595e-12		hypothetical protein OsI_23297 [Oryza sativa Indica Group]		Histidine kinase				GO:0000155//phosphorelay sensor kinase activity;GO:0005622//intracellular;GO:0016021//integral component of membrane
Unigene73467_All	1013	-6.55797	1.93262e-12	5.40595e-12	K04733//interleukin-1 receptor-associated kinase 4 [EC:2.7.11.1];K01180//endo-1,3(4)-beta-glucanase [EC:3.2.1.6];K04733//interleukin-1 receptor-associated kinase 4 [EC:2.7.11.1];K04733//interleukin-1 receptor-associated kinase 4 [EC:2.7.11.1];K04733//interleukin-1 receptor-associated kinase 4 [EC:2.7.11.1]	hypothetical protein BRADI_1g20032 [Brachypodium distachyon]	[M] LSE0120 A Extensin and related proteins	Hint domain	Proline-rich receptor-like protein kinase PERK8 OS=Arabidopsis thaliana GN=PERK8 PE=1 SV=1
CL4905.Contig1_All	1549	-6.55668	1.10857e-109	1.44327e-108				Myb-like DNA-binding domain		MYB
CL257.Contig3_All	5409	-6.54999	2.80303e-104	3.50523e-103				FAR1 DNA-binding domain
Unigene31930_All	524	-6.5422	4.00004e-23	1.70936e-22
Unigene31556_All	1344	-6.5422	1.14022e-108	1.47215e-107				Transposase IS200 like
Unigene36_All	1436	-6.53986	2.06032e-52	1.56732e-51		hypothetical protein NGA_2110200 [Nannochloropsis gaditana CCMP526] >EKU21188.1 hypothetical protein NGA_2110200 [Nannochloropsis gaditana CCMP526] >EWM24000.1 hypothetical protein Naga_100040g24 [Nannochloropsis gaditana]
Unigene16494_All	1749	-6.53566	0	0		hypothetical protein AURANDRAFT_72910, partial [Aureococcus anophagefferens] >EGB01714.1 hypothetical protein AURANDRAFT_72910, partial [Aureococcus anophagefferens]		PAS fold				GO:0005509//calcium ion binding
Unigene43248_All	1304	-6.53425	7.02802e-87	7.72237e-86
Unigene11797_All	853	-6.53361	2.8774e-12	7.97914e-12		EsV-1-7 [Ectocarpus siliculosus]		AN1-like Zinc finger
Unigene59529_All	594	-6.52626	3.24141e-12	8.96855e-12	K14325//RNA-binding protein with serine-rich domain 1+ko03015//mRNA surveillance pathway+ko03013//RNA transport;K12896//splicing factor, arginine/serine-rich 7+ko03040//Spliceosome;K13171//serine/arginine repetitive matrix protein 1+ko03015//mRNA surveillance pathway+ko03013//RNA transport;K10523//speckle-type POZ protein	hypothetical protein SOVF_212010, partial [Spinacia oleracea]	[T] KOG1187 Serine/threonine protein kinase	Bacterial extracellular solute-binding protein, family 7	Proline-rich receptor-like protein kinase PERK9 OS=Arabidopsis thaliana GN=PERK9 PE=1 SV=1			GO:0005199//structural constituent of cell wall;GO:0004674//protein serine/threonine kinase activity;GO:0005524//ATP binding;GO:0016021//integral component of membrane
Unigene20705_All	414	-6.52626	3.24141e-12	8.96855e-12
Unigene60751_All	835	-6.52626	3.24141e-12	8.96855e-12		PREDICTED: ABC transporter arginine-binding protein 1-like [Gossypium hirsutum]		Bacterial extracellular solute-binding proteins, family 3				GO:0003949//1-(5-phosphoribosyl)-5-[(5-phosphoribosylamino)methylideneamino]imidazole-4-carboxamide isomerase activity;GO:0000105//histidine biosynthetic process;GO:0000162//tryptophan biosynthetic process;GO:0005737//cytoplasm;GO:0005215//transporter activity
Unigene33241_All	6597	-6.52626	2.61035e-255	6.56159e-254	K00106//xanthine dehydrogenase/oxidase [EC:1.17.1.4 1.17.3.2]+ko04146//Peroxisome+ko00232//Caffeine metabolism+ko00230//Purine metabolism+ko01100//Metabolic pathways+ko01110//Biosynthesis of secondary metabolites;K00106//xanthine dehydrogenase/oxidase [EC:1.17.1.4 1.17.3.2]+ko04146//Peroxisome+ko00232//Caffeine metabolism+ko00230//Purine metabolism+ko01100//Metabolic pathways+ko01110//Biosynthesi…	hypothetical protein GPECTOR_7g1209 [Gonium pectorale]	[F] KOG0430 Xanthine dehydrogenase	Molybdopterin-binding domain of aldehyde dehydrogenase	Indole-3-acetaldehyde oxidase OS=Arabidopsis thaliana GN=AAO1 PE=1 SV=2			GO:0016614//oxidoreductase activity, acting on CH-OH group of donors;GO:0009055//electron transfer activity;GO:0051537//2 iron, 2 sulfur cluster binding;GO:0004855//xanthine oxidase activity;GO:0005506//iron ion binding;GO:0050660//flavin adenine dinucleotide binding;GO:0004854//xanthine dehydrogenase activity
Unigene61477_All	1232	-6.52626	6.67944e-23	2.83511e-22	K00457//4-hydroxyphenylpyruvate dioxygenase [EC:1.13.11.27]+ko00130//Ubiquinone and other terpenoid-quinone biosynthesis+ko00350//Tyrosine metabolism+ko01100//Metabolic pathways+ko00360//Phenylalanine metabolism;K00457//4-hydroxyphenylpyruvate dioxygenase [EC:1.13.11.27]+ko00130//Ubiquinone and other terpenoid-quinone biosynthesis+ko00350//Tyrosine metabolism+ko01100//Metabolic pathways+ko00360//…	4-hydroxyphenylpyruvate dioxygenase, 4HPPD [Dorcoceras hygrometricum]	[E] KOG0638 4-hydroxyphenylpyruvate dioxygenase	Hydroxyphenylpyruvate dioxygenase, HPPD, N-terminal	4-hydroxyphenylpyruvate dioxygenase OS=Plectranthus scutellarioides PE=2 SV=1			GO:0009072//aromatic amino acid family metabolic process;GO:0046872//metal ion binding;GO:0003868//4-hydroxyphenylpyruvate dioxygenase activity
Unigene2883_All	1163	-6.52626	3.24141e-12	8.96855e-12		hypothetical protein AURANDRAFT_70520 [Aureococcus anophagefferens] >EGB12618.1 hypothetical protein AURANDRAFT_70520 [Aureococcus anophagefferens]		Anaphase-promoting complex subunit 4 WD40 domain				GO:0005509//calcium ion binding
CL2055.Contig2_All	1882	-6.52417	4.51607e-44	3.03599e-43	K13172//serine/arginine repetitive matrix protein 2;K13171//serine/arginine repetitive matrix protein 1+ko03015//mRNA surveillance pathway+ko03013//RNA transport;K13171//serine/arginine repetitive matrix protein 1+ko03015//mRNA surveillance pathway+ko03013//RNA transport;K09566//peptidyl-prolyl isomerase G (cyclophilin G) [EC:5.2.1.8]	flocculation protein FLO11-like [Spinacia oleracea]	[GO] KOG4157 beta-1,6-N-acetylglucosaminyltransferase, contains WSC domain	Bacterial extracellular solute-binding protein	Protein TIC 214 OS=Cucumis sativus GN=TIC214 PE=3 SV=2
CL2261.Contig9_All	848	-6.52015	3.5769e-12	9.87263e-12	K14944//RNA-binding protein Nova;K14944//RNA-binding protein Nova;K14944//RNA-binding protein Nova;K14944//RNA-binding protein Nova	hypothetical protein H257_05978 [Aphanomyces astaci] >ETV81460.1 hypothetical protein H257_05978 [Aphanomyces astaci]	[A] KOG1676 K-homology type RNA binding proteins		Protein BTR1 OS=Arabidopsis thaliana GN=BTR1 PE=1 SV=1			GO:0003723//RNA binding
CL5408.Contig2_All	1574	-6.50608	0	0		PREDICTED: formin-like protein 20 isoform X1 [Fragaria vesca subsp. vesca]		PX domain
CL2685.Contig2_All	1807	-6.50559	4.51794e-12	1.24135e-11	K00253//isovaleryl-CoA dehydrogenase [EC:1.3.8.4]+ko00280//Valine, leucine and isoleucine degradation+ko01100//Metabolic pathways;K00253//isovaleryl-CoA dehydrogenase [EC:1.3.8.4]+ko00280//Valine, leucine and isoleucine degradation+ko01100//Metabolic pathways;K00253//isovaleryl-CoA dehydrogenase [EC:1.3.8.4]+ko00280//Valine, leucine and isoleucine degradation+ko01100//Metabolic pathways;K00253//i…	uncharacterized protein LOC109794584, partial [Cajanus cajan]	[I] KOG0139 Short-chain acyl-CoA dehydrogenase	Acetyl-CoA dehydrogenase C-terminal like	Isovaleryl-CoA dehydrogenase, mitochondrial OS=Solanum tuberosum GN=IVD PE=1 SV=2			GO:0016627//oxidoreductase activity, acting on the CH-CH group of donors;GO:0050660//flavin adenine dinucleotide binding
Unigene59385_All	885	-6.49384	5.44778e-12	1.48942e-11	K18588//coenzyme Q-binding protein COQ10;K18588//coenzyme Q-binding protein COQ10	hypothetical protein, variant 1 [Phytophthora parasitica P1569] >ETL81600.1 hypothetical protein, variant 1 [Phytophthora parasitica] >ETM34812.1 hypothetical protein, variant 1 [Phytophthora parasitica] >ETP32610.1 hypothetical protein, variant 1 [Phytophthora parasitica P10297]	[I] KOG3177 Oligoketide cyclase/lipid transport protein	Polyketide cyclase / dehydrase and lipid transport				GO:0005509//calcium ion binding
Unigene38993_All	1861	-6.49384	1.86795e-22	7.82636e-22	K14325//RNA-binding protein with serine-rich domain 1+ko03015//mRNA surveillance pathway+ko03013//RNA transport	Nucleotide-binding, alpha-beta plait [Cynara cardunculus var. scolymus]	[R] KOG0118 FOG: RRM domain		Serine/arginine-rich splicing factor SR45 OS=Arabidopsis thaliana GN=SR45 PE=1 SV=1
Unigene63254_All	1252	-6.49384	5.44778e-12	1.48942e-11	K02469//DNA gyrase subunit A [EC:5.99.1.3];K02469//DNA gyrase subunit A [EC:5.99.1.3];K02469//DNA gyrase subunit A [EC:5.99.1.3]	putative DNA gyrase subunit A, chloroplastic/mitochondrial [Dorcoceras hygrometricum]	[B] KOG0355 DNA topoisomerase type II	DNA gyrase C-terminal domain, beta-propeller	DNA gyrase subunit A, chloroplastic/mitochondrial OS=Nicotiana benthamiana GN=GYRA PE=2 SV=1			GO:0003677//DNA binding;GO:0005524//ATP binding;GO:0003918//DNA topoisomerase type II (ATP-hydrolyzing) activity;GO:0009536//plastid;GO:0005694//chromosome;GO:0006265//DNA topological change
Unigene35235_All	1553	-6.49384	1.86795e-22	7.82636e-22	K13303//serum/glucocorticoid-regulated kinase 2 [EC:2.7.11.1];K04688//ribosomal protein S6 kinase beta [EC:2.7.11.1]	conserved unknown protein [Ectocarpus siliculosus]	[RT] KOG0598 Ribosomal protein S6 kinase and related proteins	Protein kinase domain	CBL-interacting serine/threonine-protein kinase 8 OS=Arabidopsis thaliana GN=CIPK8 PE=1 SV=1			GO:0004674//protein serine/threonine kinase activity;GO:0005524//ATP binding
CL9489.Contig1_All	1577	-6.49384	5.44778e-12	1.48942e-11	K00326//cytochrome-b5 reductase [EC:1.6.2.2]+ko00520//Amino sugar and nucleotide sugar metabolism;K00326//cytochrome-b5 reductase [EC:1.6.2.2]+ko00520//Amino sugar and nucleotide sugar metabolism;K00326//cytochrome-b5 reductase [EC:1.6.2.2]+ko00520//Amino sugar and nucleotide sugar metabolism;K00326//cytochrome-b5 reductase [EC:1.6.2.2]+ko00520//Amino sugar and nucleotide sugar metabolism;K00326/…	PREDICTED: NADH--cytochrome b5 reductase 1 [Eucalyptus grandis]	[HC] KOG0534 NADH-cytochrome b-5 reductase	Phenylacetic acid catabolic protein	Nitrate reductase [NADH] OS=Lotus japonicus GN=NIA PE=3 SV=1			GO:0046872//metal ion binding;GO:0020037//heme binding;GO:0016021//integral component of membrane;GO:0005344//oxygen carrier activity;GO:0051213//dioxygenase activity;GO:0004128//cytochrome-b5 reductase activity, acting on NAD(P)H;GO:0016491//oxidoreductase activity
Unigene72690_All	1559	-6.49384	1.86795e-22	7.82636e-22	K01756//adenylosuccinate lyase [EC:4.3.2.2]+ko00250//Alanine, aspartate and glutamate metabolism+ko00230//Purine metabolism+ko01100//Metabolic pathways+ko01110//Biosynthesis of secondary metabolites;K01756//adenylosuccinate lyase [EC:4.3.2.2]+ko00250//Alanine, aspartate and glutamate metabolism+ko00230//Purine metabolism+ko01100//Metabolic pathways+ko01110//Biosynthesis of secondary metabolites;K…	predicted protein [Physcomitrella patens] >EDQ48162.1 predicted protein, partial [Physcomitrella patens]	[F] KOG2700 Adenylosuccinate lyase	Lyase	Proline-rich receptor-like protein kinase PERK9 OS=Arabidopsis thaliana GN=PERK9 PE=1 SV=1			GO:0070626//(S)-2-(5-amino-1-(5-phospho-D-ribosyl)imidazole-4-carboxamido)succinate AMP-lyase (fumarate-forming) activity;GO:0044208//'de novo' AMP biosynthetic process;GO:0004018//N6-(1,2-dicarboxyethyl)AMP AMP-lyase (fumarate-forming) activity;GO:0006189//'de novo' IMP biosynthetic process
CL9503.Contig1_All	1079	-6.4899	5.79881e-12	1.58244e-11		late embryogenesis abundant (LEA)-like protein [Medicago truncatula] >KEH37067.1 late embryogenesis abundant (LEA)-like protein [Medicago truncatula]	[A] KOG1869 Splicing coactivator SRm160/300, subunit SRm300	Transposase DDE domain
CL1524.Contig2_All	2332	-6.48287	1.6074e-63	1.40434e-62	K13171//serine/arginine repetitive matrix protein 1+ko03015//mRNA surveillance pathway+ko03013//RNA transport;K13171//serine/arginine repetitive matrix protein 1+ko03015//mRNA surveillance pathway+ko03013//RNA transport;K13171//serine/arginine repetitive matrix protein 1+ko03015//mRNA surveillance pathway+ko03013//RNA transport;K13171//serine/arginine repetitive matrix protein 1+ko03015//mRNA sur…	flocculation protein FLO11-like [Spinacia oleracea]	[P] KOG2349 Na+:iodide/myo-inositol/multivitamin symporters	Sodium:solute symporter family				GO:0006397//mRNA processing
CL3230.Contig5_All	1109	-6.48	6.77946e-12	1.84397e-11		hypothetical protein BU14_0249s0013 [Porphyra umbilicalis]		Integral peroxisomal membrane peroxin
Unigene66021_All	1625	-6.47735	3.1284e-22	1.30207e-21	K00010//myo-inositol 2-dehydrogenase / D-chiro-inositol 1-dehydrogenase [EC:1.1.1.18 1.1.1.369]+ko01100//Metabolic pathways+ko00562//Inositol phosphate metabolism;K13171//serine/arginine repetitive matrix protein 1+ko03015//mRNA surveillance pathway+ko03013//RNA transport;K00010//myo-inositol 2-dehydrogenase / D-chiro-inositol 1-dehydrogenase [EC:1.1.1.18 1.1.1.369]+ko01100//Metabolic pathways+ko…	oxidoreductase, putative [Ricinus communis]	[GQ] KOG2741 Dimeric dihydrodiol dehydrogenase	Oxidoreductase family, NAD-binding Rossmann fold	Uncharacterized oxidoreductase At4g09670 OS=Arabidopsis thaliana GN=At4g09670 PE=1 SV=1			GO:0016491//oxidoreductase activity
CL4170.Contig3_All	853	-6.4727	7.60342e-12	2.0611e-11
CL9204.Contig1_All	3060	-6.47195	1.73922e-83	1.86368e-82	K01687//dihydroxy-acid dehydratase [EC:4.2.1.9]+ko00290//Valine, leucine and isoleucine biosynthesis+ko00770//Pantothenate and CoA biosynthesis+ko01230//Biosynthesis of amino acids+ko01100//Metabolic pathways+ko01110//Biosynthesis of secondary metabolites+ko01210//2-Oxocarboxylic acid metabolism;K01687//dihydroxy-acid dehydratase [EC:4.2.1.9]+ko00290//Valine, leucine and isoleucine biosynthesis+k…	dihydroxy-acid dehydratase, mitochondrial-like [Dorcoceras hygrometricum]	[E] KOG0628 Aromatic-L-amino-acid/L-histidine decarboxylase	Dehydratase family	Tyrosine decarboxylase 1 OS=Arabidopsis thaliana GN=ELI5 PE=2 SV=1			GO:0004160//dihydroxy-acid dehydratase activity;GO:0009082//branched-chain amino acid biosynthetic process
CL4408.Contig2_All	1842	-6.46903	2.48994e-83	2.66526e-82	K00873//pyruvate kinase [EC:2.7.1.40]+ko00010//Glycolysis / Gluconeogenesis+ko00230//Purine metabolism+ko01230//Biosynthesis of amino acids+ko01100//Metabolic pathways+ko01110//Biosynthesis of secondary metabolites+ko00620//Pyruvate metabolism+ko01200//Carbon metabolism;K00873//pyruvate kinase [EC:2.7.1.40]+ko00010//Glycolysis / Gluconeogenesis+ko00230//Purine metabolism+ko01230//Biosynthesis of …	pyruvate kinase [Nannochloropsis gaditana]	[G] KOG2323 Pyruvate kinase	Pyruvate kinase, barrel domain	Pyruvate kinase, cytosolic isozyme OS=Glycine max PE=2 SV=1			GO:0030955//potassium ion binding;GO:0000287//magnesium ion binding;GO:0004743//pyruvate kinase activity;GO:0016301//kinase activity
CL11132.Contig6_All	1687	-6.4687	8.09467e-12	2.19032e-11	K15430//tRNA (guanine10-N2)-methyltransferase [EC:2.1.1.214];K15430//tRNA (guanine10-N2)-methyltransferase [EC:2.1.1.214];K15430//tRNA (guanine10-N2)-methyltransferase [EC:2.1.1.214];K15430//tRNA (guanine10-N2)-methyltransferase [EC:2.1.1.214];K15430//tRNA (guanine10-N2)-methyltransferase [EC:2.1.1.214]	Putative RNA methyltransferase [Klebsormidium nitens]	[L] KOG2671 Putative RNA methylase	SAP domain
Unigene74852_All	636	-6.46067	5.24463e-22	2.16691e-21		Ectoine dioxygenase [Symbiodinium microadriaticum]		Acetyltransferase (GNAT) family
Unigene62494_All	557	-6.46067	9.17529e-12	2.47424e-11
Unigene58422_All	888	-6.46067	9.17529e-12	2.47424e-11	K01958//pyruvate carboxylase [EC:6.4.1.1]+ko00020//Citrate cycle (TCA cycle)+ko01230//Biosynthesis of amino acids+ko01100//Metabolic pathways+ko00620//Pyruvate metabolism+ko01200//Carbon metabolism;K01958//pyruvate carboxylase [EC:6.4.1.1]+ko00020//Citrate cycle (TCA cycle)+ko01230//Biosynthesis of amino acids+ko01100//Metabolic pathways+ko00620//Pyruvate metabolism+ko01200//Carbon metabolism;K01…	pyruvate carboxylase [Emiliania huxleyi CCMP1516] >EOD09666.1 pyruvate carboxylase [Emiliania huxleyi CCMP1516]	[C] KOG0369 Pyruvate carboxylase	Conserved carboxylase domain				GO:0004736//pyruvate carboxylase activity;GO:0046872//metal ion binding;GO:0004075//biotin carboxylase activity;GO:0006090//pyruvate metabolic process;GO:0005524//ATP binding;GO:0006094//gluconeogenesis;GO:0009374//biotin binding
Unigene16122_All	2343	-6.46067	2.38779e-42	1.55783e-41		hypothetical protein FisN_17Lh188 [Fistulifera solaris]		Carboxypeptidase regulatory-like domain
Unigene60754_All	888	-6.46067	9.17529e-12	2.47424e-11				Microsomal signal peptidase 12 kDa subunit (SPC12)
Unigene18277_All	3387	-6.45731	6.64984e-103	8.23291e-102		hypothetical protein COLO4_00976 [Corchorus olitorius]		TonB-dependent Receptor Plug Domain
Unigene75142_All	1882	-6.4438	8.80132e-22	3.60764e-21	K00889//1-phosphatidylinositol-4-phosphate 5-kinase [EC:2.7.1.68]+ko04144//Endocytosis+ko01100//Metabolic pathways+ko04070//Phosphatidylinositol signaling system+ko00562//Inositol phosphate metabolism;K00889//1-phosphatidylinositol-4-phosphate 5-kinase [EC:2.7.1.68]+ko04144//Endocytosis+ko01100//Metabolic pathways+ko04070//Phosphatidylinositol signaling system+ko00562//Inositol phosphate metaboli…	Radial spoke head protein [Phytophthora megakarya]	[T] KOG0229 Phosphatidylinositol-4-phosphate 5-kinase	MORN repeat	Phosphatidylinositol 4-phosphate 5-kinase 7 OS=Arabidopsis thaliana GN=PIP5K7 PE=1 SV=1
Unigene20629_All	1661	-6.4438	8.80132e-22	3.60764e-21	K02045//sulfate transport system ATP-binding protein [EC:3.6.3.25]+ko00920//Sulfur metabolism+ko02010//ABC transporters;K02045//sulfate transport system ATP-binding protein [EC:3.6.3.25]+ko00920//Sulfur metabolism+ko02010//ABC transporters;K02045//sulfate transport system ATP-binding protein [EC:3.6.3.25]+ko00920//Sulfur metabolism+ko02010//ABC transporters;K02045//sulfate transport system ATP-bi…	abc transporter, putative, partial [Ricinus communis]	[Q] KOG0055 Multidrug/pheromone exporter, ABC superfamily	Substrate binding domain of ABC-type glycine betaine transport system	Probable sulfate/thiosulfate import ATP-binding protein CysA OS=Chlorella vulgaris GN=cysA PE=3 SV=1			GO:0006810//transport;GO:0005524//ATP binding;GO:0016021//integral component of membrane;GO:0005886//plasma membrane;GO:0016887//ATPase activity
CL11001.Contig7_All	2145	-6.44074	1.2492e-11	3.34669e-11	K12890//splicing factor, arginine/serine-rich 1+ko03040//Spliceosome;K12890//splicing factor, arginine/serine-rich 1+ko03040//Spliceosome;K12890//splicing factor, arginine/serine-rich 1+ko03040//Spliceosome;K12890//splicing factor, arginine/serine-rich 1+ko03040//Spliceosome;K12890//splicing factor, arginine/serine-rich 1+ko03040//Spliceosome	serine/arginine-rich-splicing factor SR34-like isoform X2 [Momordica charantia]	[A] KOG0106 Alternative splicing factor SRp55/B52/SRp75 (RRM superfamily)	RNA recognition motif. (a.k.a. RRM, RBD, or RNP domain)	Serine/arginine-rich-splicing factor SR34 OS=Arabidopsis thaliana GN=SR34 PE=1 SV=1		XM_002459174.2 PREDICTED: Sorghum bicolor serine/arginine-rich splicing factor 4 (LOC8081599), mRNA	GO:0003723//RNA binding
Unigene70233_All	724	-6.43665	1.33024e-11	3.55785e-11
CL4288.Contig2_All	526	-6.4305	1.46185e-11	3.89914e-11				Spc97 / Spc98 family
Unigene28994_All	375	-6.42672	1.54866e-11	4.11986e-11	K22066//BolA-like protein 1;K22066//BolA-like protein 1;K22066//BolA-like protein 1;K22066//BolA-like protein 1;K22066//BolA-like protein 1	BolA domain-containing protein/SufE domain-containing protein, partial [Cephalotus follicularis]		Fe-S metabolism associated domain	Quinolinate synthase, chloroplastic OS=Oryza sativa subsp. japonica GN=Os12g0290150 PE=3 SV=2			GO:0005739//mitochondrion;GO:0008047//enzyme activator activity;GO:0009570//chloroplast stroma
Unigene32291_All	636	-6.42672	1.54866e-11	4.11986e-11				Methyltransferase domain
CL2778.Contig3_All	525	-6.42672	1.54866e-11	4.11986e-11
Unigene75784_All	859	-6.42672	1.54866e-11	4.11986e-11	K00626//acetyl-CoA C-acetyltransferase [EC:2.3.1.9]+ko00310//Lysine degradation+ko00380//Tryptophan metabolism+ko00900//Terpenoid backbone biosynthesis+ko00280//Valine, leucine and isoleucine degradation+ko00640//Propanoate metabolism+ko01100//Metabolic pathways+ko00650//Butanoate metabolism+ko01110//Biosynthesis of secondary metabolites+ko01212//Fatty acid metabolism+ko00071//Fatty acid degradat…	acetyl-CoA acyltransferase 2 [Saprolegnia diclina VS20] >EQC40076.1 acetyl-CoA acyltransferase 2 [Saprolegnia diclina VS20]	[I] KOG1391 Acetyl-CoA acetyltransferase	Thiolase, N-terminal domain	3-ketoacyl-CoA thiolase 1, peroxisomal OS=Arabidopsis thaliana GN=KAT1 PE=2 SV=2			GO:0008152//metabolic process;GO:0016747//transferase activity, transferring acyl groups other than amino-acyl groups
Unigene2808_All	464	-6.42672	1.47851e-21	6.0187e-21
Unigene3469_All	598	-6.42672	1.54866e-11	4.11986e-11				Dehydrogenase E1 component
Unigene57383_All	1190	-6.42672	1.54866e-11	4.11986e-11		phenylacetic acid degradation protein, partial [Pfiesteria piscicida]		Phenylacetic acid catabolic protein
Unigene32043_All	451	-6.42672	1.54866e-11	4.11986e-11	K03521//electron transfer flavoprotein beta subunit;K03521//electron transfer flavoprotein beta subunit;K03521//electron transfer flavoprotein beta subunit;K03521//electron transfer flavoprotein beta subunit;K03521//electron transfer flavoprotein beta subunit	Electron transfer flavoprotein subunit beta [Triticum urartu]	[C] KOG3180 Electron transfer flavoprotein, beta subunit	Electron transfer flavoprotein domain	Electron transfer flavoprotein subunit beta, mitochondrial OS=Oryza sativa subsp. japonica GN=ETFB PE=2 SV=1			GO:0009055//electron transfer activity
Unigene36633_All	1140	-6.42672	1.54866e-11	4.11986e-11		hypothetical protein GUITHDRAFT_119564 [Guillardia theta CCMP2712] >EKX34274.1 hypothetical protein GUITHDRAFT_119564 [Guillardia theta CCMP2712]		ABC transporter transmembrane region
Unigene63052_All	1228	-6.42672	1.54866e-11	4.11986e-11
Unigene47140_All	555	-6.42672	1.47851e-21	6.0187e-21	K11275//histone H1/5;K11275//histone H1/5	Peroxidase 44, partial [Dichanthelium oligosanthes]	[M] LSE0601 A Pollen extensin-like protein (Pex)	Type I restriction enzyme R protein N terminus (HSDR_N)	Leucine-rich repeat extensin-like protein 2 OS=Arabidopsis thaliana GN=LRX2 PE=2 SV=1
Unigene8301_All	760	-6.42432	1.60659e-11	4.271e-11		F-box domain containing protein [Ectocarpus siliculosus]		WD domain, G-beta repeat
Unigene25078_All	1007	-6.40944	2.48628e-21	1.00479e-20	K14492//two-component response regulator ARR-A family+ko04075//Plant hormone signal transduction;K14489//arabidopsis histidine kinase 2/3/4 (cytokinin receptor) [EC:2.7.13.3]+ko04075//Plant hormone signal transduction;K14492//two-component response regulator ARR-A family+ko04075//Plant hormone signal transduction;K14492//two-component response regulator ARR-A family+ko04075//Plant hormone signal …	Ycf27 (chloroplast) [Guillardia theta] >O78428.1 RecName: Full=Probable transcriptional regulator ycf27; AltName: Full=OmpR-like protein >AAC35613.1 ompR homolog (chloroplast) [Guillardia theta]		Response regulator receiver domain	Probable transcriptional regulator ycf27 OS=Guillardia theta GN=ycf27 PE=3 SV=1			GO:0003677//DNA binding;GO:0000160//phosphorelay signal transduction system;GO:0006355//regulation of transcription, DNA-templated;GO:0006351//transcription, DNA-templated;GO:0009536//plastid;GO:0009507//chloroplast
CL9605.Contig1_All	547	-6.40944	2.48628e-21	1.00479e-20	K00605//aminomethyltransferase [EC:2.1.2.10]+ko00670//One carbon pool by folate+ko01100//Metabolic pathways+ko01110//Biosynthesis of secondary metabolites+ko00260//Glycine, serine and threonine metabolism+ko01200//Carbon metabolism+ko00630//Glyoxylate and dicarboxylate metabolism;K00605//aminomethyltransferase [EC:2.1.2.10]+ko00670//One carbon pool by folate+ko01100//Metabolic pathways+ko01110//B…	hypothetical protein PHYSODRAFT_559209 [Phytophthora sojae] >EGZ18211.1 hypothetical protein PHYSODRAFT_559209 [Phytophthora sojae]	[E] KOG2770 Aminomethyl transferase	Aminomethyltransferase folate-binding domain	Aminomethyltransferase, mitochondrial OS=Arabidopsis thaliana GN=GDCST PE=2 SV=1			GO:0006546//glycine catabolic process;GO:0008483//transaminase activity;GO:0004047//aminomethyltransferase activity;GO:0005739//mitochondrion
CL8677.Contig4_All	2947	-6.3997	0	0	K02184//formin 2;K02184//formin 2;K02184//formin 2;K02184//formin 2;K02184//formin 2	hypothetical protein BU14_0180s0014, partial [Porphyra umbilicalis]	[A] KOG0115 RNA-binding protein p54nrb (RRM superfamily)		Vegetative cell wall protein gp1 OS=Chlamydomonas reinhardtii GN=GP1 PE=1 SV=1
CL10095.Contig7_All	436	-6.39652	2.44632e-11	6.43694e-11
Unigene47187_All	252	-6.39196	2.61967e-11	6.87415e-11
Unigene2749_All	543	-6.39196	2.61967e-11	6.87415e-11	K00573//protein-L-isoaspartate(D-aspartate) O-methyltransferase [EC:2.1.1.77];K10592//E3 ubiquitin-protein ligase HUWE1 [EC:2.3.2.26]+ko04120//Ubiquitin mediated proteolysis;K00573//protein-L-isoaspartate(D-aspartate) O-methyltransferase [EC:2.1.1.77];K00573//protein-L-isoaspartate(D-aspartate) O-methyltransferase [EC:2.1.1.77]	hypothetical protein ACHHYP_07402 [Achlya hypogyna]	[O] KOG1661 Protein-L-isoaspartate(D-aspartate) O-methyltransferase	Protein-L-isoaspartate(D-aspartate) O-methyltransferase (PCMT)				GO:0004719//protein-L-isoaspartate (D-aspartate) O-methyltransferase activity
Unigene72110_All	869	-6.39196	2.61967e-11	6.87415e-11		Drug/Metabolite transporter superfamily [Micromonas pusilla CCMP1545] >EEH59559.1 Drug/Metabolite transporter superfamily [Micromonas pusilla CCMP1545]	[R] KOG4510 Permease of the drug/metabolite transporter (DMT) superfamily	EamA-like transporter family				GO:0016021//integral component of membrane
Unigene40574_All	842	-6.39196	2.61967e-11	6.87415e-11	K13171//serine/arginine repetitive matrix protein 1+ko03015//mRNA surveillance pathway+ko03013//RNA transport;K13171//serine/arginine repetitive matrix protein 1+ko03015//mRNA surveillance pathway+ko03013//RNA transport;K09566//peptidyl-prolyl isomerase G (cyclophilin G) [EC:5.2.1.8]	hypothetical protein BVRB_020900, partial [Beta vulgaris subsp. vulgaris]		Bacterial extracellular solute-binding protein, family 7	Peptidyl-prolyl cis-trans isomerase CYP95 OS=Arabidopsis thaliana GN=CYP95 PE=1 SV=2			GO:0004252//serine-type endopeptidase activity
Unigene36161_All	944	-6.39196	2.61967e-11	6.87415e-11	K00626//acetyl-CoA C-acetyltransferase [EC:2.3.1.9]+ko00310//Lysine degradation+ko00380//Tryptophan metabolism+ko00900//Terpenoid backbone biosynthesis+ko00280//Valine, leucine and isoleucine degradation+ko00640//Propanoate metabolism+ko01100//Metabolic pathways+ko00650//Butanoate metabolism+ko01110//Biosynthesis of secondary metabolites+ko01212//Fatty acid metabolism+ko00071//Fatty acid degradat…	hypothetical protein PPTG_04240 [Phytophthora parasitica INRA-310] >ETI35867.1 hypothetical protein F443_17850 [Phytophthora parasitica P1569] >ETK76130.1 hypothetical protein L915_17373 [Phytophthora parasitica] >ETL29576.1 hypothetical protein L916_17265 [Phytophthora parasitica] >ETL82773.1 hypothetical protein L917_17098 [Phytophthora parasitica] >ETM36028.1 hypothetical protein L914_17168 [P…	[I] KOG1391 Acetyl-CoA acetyltransferase	Thiolase, N-terminal domain	3-ketoacyl-CoA thiolase 5, peroxisomal OS=Arabidopsis thaliana GN=KAT5 PE=2 SV=2			GO:0006635//fatty acid beta-oxidation;GO:0008152//metabolic process;GO:0003988//acetyl-CoA C-acyltransferase activity;GO:0016747//transferase activity, transferring acyl groups other than amino-acyl groups;GO:0005739//mitochondrion
Unigene43153_All	927	-6.39196	2.61967e-11	6.87415e-11		hypothetical protein GUITHDRAFT_149820 [Guillardia theta CCMP2712] >EKX55556.1 hypothetical protein GUITHDRAFT_149820 [Guillardia theta CCMP2712]	[S] KOG3299 Uncharacterized conserved protein	Protein of unknown function, DUF393				GO:0043231//intracellular membrane-bounded organelle;GO:0051537//2 iron, 2 sulfur cluster binding
Unigene35836_All	1032	-6.39196	2.61967e-11	6.87415e-11		Cystine-binding periplasmic protein precursor, putative [Ricinus communis]		Bacterial extracellular solute-binding proteins, family 3				GO:0005215//transporter activity
Unigene17581_All	1279	-6.39196	2.61967e-11	6.87415e-11		hypothetical protein BU14_0364s0009 [Porphyra umbilicalis]		Phenylacetic acid catabolic protein
Unigene31517_All	915	-6.39196	2.61967e-11	6.87415e-11		conserved hypothetical protein [Ricinus communis]
Unigene58469_All	1245	-6.39196	2.61967e-11	6.87415e-11		hypothetical protein CHLNCDRAFT_135134 [Chlorella variabilis] >EFN54616.1 hypothetical protein CHLNCDRAFT_135134 [Chlorella variabilis]	[WV] KOG1216 von Willebrand factor and related coagulation proteins	LCCL domain				GO:0031012//extracellular matrix;GO:0045089//positive regulation of innate immune response;GO:0042742//defense response to bacterium
Unigene24123_All	719	-6.39196	2.61967e-11	6.87415e-11				NolX protein
Unigene27613_All	656	-6.39196	4.18533e-21	1.67698e-20	K12815//pre-mRNA-splicing factor ATP-dependent RNA helicase DHX38/PRP16 [EC:3.6.4.13]+ko03040//Spliceosome	hypothetical protein VIGAN_04365000 [Vigna angularis var. angularis]	[MW] KOG1437 Fasciclin and related adhesion glycoproteins				KY440192.1 Saccharina japonica clone 4 5S ribosomal RNA gene region	GO:0016021//integral component of membrane
CL10368.Contig2_All	1347	-6.38065	5.84418e-21	2.32945e-20
Unigene28573_All	1483	-6.37425	7.05287e-21	2.80538e-20		hypothetical protein BU14_1759s0002 [Porphyra umbilicalis]		Bacterial extracellular solute-binding protein, family 7
Unigene46891_All	1246	-6.37425	7.05287e-21	2.80538e-20		vegetative cell wall protein gp1-like [Spinacia oleracea]
Unigene36710_All	993	-6.36837	8.38026e-21	3.32459e-20	K13171//serine/arginine repetitive matrix protein 1+ko03015//mRNA surveillance pathway+ko03013//RNA transport;K14325//RNA-binding protein with serine-rich domain 1+ko03015//mRNA surveillance pathway+ko03013//RNA transport;K14325//RNA-binding protein with serine-rich domain 1+ko03015//mRNA surveillance pathway+ko03013//RNA transport;K00430//peroxidase [EC:1.11.1.7]+ko01100//Metabolic pathways+ko01…	PREDICTED: pollen-specific leucine-rich repeat extensin-like protein 3 [Citrus sinensis]	[AR] KOG2146 Splicing coactivator SRm160/300, subunit SRm160 (contains PWI domain)	Peptidase family M48	Classical arabinogalactan protein 9 OS=Arabidopsis thaliana GN=AGP9 PE=1 SV=2
Unigene29849_All	3213	-6.36148	1.23867e-134	1.86403e-133		hypothetical protein COLO4_00976 [Corchorus olitorius]		TonB dependent receptor
Unigene21280_All	466	-6.35633	4.44134e-11	1.14864e-10
Unigene64384_All	615	-6.35633	4.44134e-11	1.14864e-10				Hint domain
Unigene67807_All	851	-6.35633	4.44134e-11	1.14864e-10
Unigene17592_All	890	-6.35633	4.44134e-11	1.14864e-10	K08675//ATP-dependent Lon protease [EC:3.4.21.53];K08675//ATP-dependent Lon protease [EC:3.4.21.53];K01338//ATP-dependent Lon protease [EC:3.4.21.53];K01338//ATP-dependent Lon protease [EC:3.4.21.53]	Diaminopimelate decarboxylase [Phytophthora nicotianae]	[GO] KOG4157 beta-1,6-N-acetylglucosaminyltransferase, contains WSC domain	ATP-dependent protease La (LON) substrate-binding domain	Lon protease homolog, mitochondrial OS=Ostreococcus tauri GN=Ot13g03040 PE=3 SV=2			GO:0004252//serine-type endopeptidase activity;GO:0005524//ATP binding;GO:0016485//protein processing;GO:0005782//peroxisomal matrix;GO:0006625//protein targeting to peroxisome;GO:0004176//ATP-dependent peptidase activity;GO:0030163//protein catabolic process
Unigene73747_All	1034	-6.35633	4.44134e-11	1.14864e-10		PREDICTED: transcriptional regulatory protein ros-like [Gossypium hirsutum]		ROS/MUCR transcriptional regulator protein				GO:0003677//DNA binding;GO:0006355//regulation of transcription, DNA-templated;GO:0008270//zinc ion binding
Unigene3791_All	961	-6.35633	4.44134e-11	1.14864e-10				AhpC/TSA family
CL9274.Contig1_All	1168	-6.3491	4.93726e-11	1.27372e-10	K00083//cinnamyl-alcohol dehydrogenase [EC:1.1.1.195]+ko01100//Metabolic pathways+ko01110//Biosynthesis of secondary metabolites+ko00940//Phenylpropanoid biosynthesis;K00083//cinnamyl-alcohol dehydrogenase [EC:1.1.1.195]+ko01100//Metabolic pathways+ko01110//Biosynthesis of secondary metabolites+ko00940//Phenylpropanoid biosynthesis;K00083//cinnamyl-alcohol dehydrogenase [EC:1.1.1.195]+ko01100//Me…	alcohol dehydrogenase [Phaeodactylum tricornutum CCAP 1055/1] >EEC46746.1 alcohol dehydrogenase [Phaeodactylum tricornutum CCAP 1055/1]	[Q] KOG0023 Alcohol dehydrogenase, class V	Alcohol dehydrogenase GroES-like domain	Probable cinnamyl alcohol dehydrogenase 8C OS=Oryza sativa subsp. japonica GN=CAD8C PE=2 SV=2			GO:0004022//alcohol dehydrogenase (NAD) activity;GO:0008270//zinc ion binding
Unigene85498_All	321	-6.34801	5.01632e-11	1.29364e-10
Unigene24386_All	644	-6.33819	2.00924e-20	7.87425e-20				SNARE associated Golgi protein
CL7542.Contig1_All	650	-6.33086	6.43567e-11	1.64975e-10				Tellurite resistance protein TerB
Unigene65348_All	508	-6.31981	7.5471e-11	1.92592e-10				O-Antigen ligase
Unigene61857_All	597	-6.31981	7.5471e-11	1.92592e-10		partitioning protein-like protein [Ostreococcus tauri]
Unigene35744_All	621	-6.31981	7.5471e-11	1.92592e-10
CL3721.Contig1_All	2674	-6.31981	9.5758e-39	5.84476e-38	K02045//sulfate transport system ATP-binding protein [EC:3.6.3.25]+ko00920//Sulfur metabolism+ko02010//ABC transporters;K02045//sulfate transport system ATP-binding protein [EC:3.6.3.25]+ko00920//Sulfur metabolism+ko02010//ABC transporters;K02045//sulfate transport system ATP-binding protein [EC:3.6.3.25]+ko00920//Sulfur metabolism+ko02010//ABC transporters;K02045//sulfate transport system ATP-bi…	hypothetical protein OsI_07285 [Oryza sativa Indica Group]	[Q] KOG0055 Multidrug/pheromone exporter, ABC superfamily	Substrate binding domain of ABC-type glycine betaine transport system	Sulfate/thiosulfate import ATP-binding protein cysA OS=Cucumis sativus GN=CYSA PE=3 SV=1			GO:0005524//ATP binding;GO:0016887//ATPase activity
Unigene21145_All	777	-6.31981	7.5471e-11	1.92592e-10		hypothetical protein EMIHUDRAFT_111295 [Emiliania huxleyi CCMP1516] >EOD34460.1 hypothetical protein EMIHUDRAFT_111295 [Emiliania huxleyi CCMP1516]		Lamin Tail Domain				GO:0016021//integral component of membrane
Unigene20590_All	870	-6.31981	7.5471e-11	1.92592e-10	K15634//probable phosphoglycerate mutase [EC:5.4.2.12]+ko00010//Glycolysis / Gluconeogenesis+ko01230//Biosynthesis of amino acids+ko01100//Metabolic pathways+ko01110//Biosynthesis of secondary metabolites+ko00260//Glycine, serine and threonine metabolism+ko01200//Carbon metabolism;K15634//probable phosphoglycerate mutase [EC:5.4.2.12]+ko00010//Glycolysis / Gluconeogenesis+ko01230//Biosynthesis of…	PREDICTED: phosphoglycerate mutase-like protein 4 [Tarenaya hassleriana]	[G] KOG0235 Phosphoglycerate mutase	Histidine phosphatase superfamily (branch 1)	Phosphoglycerate mutase-like protein 4 OS=Arabidopsis thaliana GN=At3g50520 PE=2 SV=1
Unigene57897_All	976	-6.31981	7.5471e-11	1.92592e-10	K02045//sulfate transport system ATP-binding protein [EC:3.6.3.25]+ko00920//Sulfur metabolism+ko02010//ABC transporters;K02045//sulfate transport system ATP-binding protein [EC:3.6.3.25]+ko00920//Sulfur metabolism+ko02010//ABC transporters;K02045//sulfate transport system ATP-binding protein [EC:3.6.3.25]+ko00920//Sulfur metabolism+ko02010//ABC transporters	hypothetical protein SOVF_192450 [Spinacia oleracea]	[Q] KOG0055 Multidrug/pheromone exporter, ABC superfamily	ABC transporter	Probable sulfate/thiosulfate import ATP-binding protein CysA OS=Chlorella vulgaris GN=cysA PE=3 SV=1			GO:0016020//membrane;GO:0005524//ATP binding;GO:0102025//ATPase-coupled thiosulfate transmembrane transporter activity;GO:0015419//ATPase-coupled sulfate transmembrane transporter activity;GO:0043190//ATP-binding cassette (ABC) transporter complex;GO:0015417//polyamine-transporting ATPase activity;GO:0009507//chloroplast
Unigene58953_All	1082	-6.31981	7.5471e-11	1.92592e-10		serine/arginine repetitive matrix protein 1-like [Zea mays]		Bacterial extracellular solute-binding protein, family 7
Unigene67488_All	1171	-6.31981	7.5471e-11	1.92592e-10		hypothetical protein Csa_6G108530 [Cucumis sativus]		Caspase domain
Unigene25162_All	606	-6.31981	7.5471e-11	1.92592e-10		hypersensitive induced reaction protein 2 [Triticum aestivum]	[C] KOG2620 Prohibitins and stomatins of the PID superfamily	SPFH domain / Band 7 family	Hypersensitive-induced response protein-like protein 2 OS=Oryza sativa subsp. japonica GN=HIRL2 PE=3 SV=1
Unigene28929_All	771	-6.31981	7.5471e-11	1.92592e-10				2Fe-2S iron-sulfur cluster binding domain
Unigene72459_All	1701	-6.31981	3.39681e-20	1.32205e-19	K03942//NADH dehydrogenase (ubiquinone) flavoprotein 1 [EC:7.1.1.2 1.6.99.3]+ko01100//Metabolic pathways+ko00190//Oxidative phosphorylation;K03942//NADH dehydrogenase (ubiquinone) flavoprotein 1 [EC:7.1.1.2 1.6.99.3]+ko01100//Metabolic pathways+ko00190//Oxidative phosphorylation;K03942//NADH dehydrogenase (ubiquinone) flavoprotein 1 [EC:7.1.1.2 1.6.99.3]+ko01100//Metabolic pathways+ko00190//Oxida…	hypothetical protein THAPSDRAFT_29850 [Thalassiosira pseudonana CCMP1335] >EED89316.1 hypothetical protein THAPSDRAFT_29850 [Thalassiosira pseudonana CCMP1335]	[C] KOG2658 NADH:ubiquinone oxidoreductase, NDUFV1/51kDa subunit	Respiratory-chain NADH dehydrogenase 51 Kd subunit	NADH dehydrogenase [ubiquinone] flavoprotein 1, mitochondrial OS=Arabidopsis thaliana GN=At5g08530 PE=1 SV=1			GO:0046872//metal ion binding;GO:0010181//FMN binding;GO:0051539//4 iron, 4 sulfur cluster binding;GO:0005743//mitochondrial inner membrane;GO:0051287//NAD binding;GO:0070469//respiratory chain;GO:0008137//NADH dehydrogenase (ubiquinone) activity
Unigene4332_All	5029	-6.31708	6.98361e-178	1.31726e-176	K00434//L-ascorbate peroxidase [EC:1.11.1.11]+ko00053//Ascorbate and aldarate metabolism+ko00480//Glutathione metabolism;K00434//L-ascorbate peroxidase [EC:1.11.1.11]+ko00053//Ascorbate and aldarate metabolism+ko00480//Glutathione metabolism;K00434//L-ascorbate peroxidase [EC:1.11.1.11]+ko00053//Ascorbate and aldarate metabolism+ko00480//Glutathione metabolism;K00428//cytochrome c peroxidase [EC:…	hypothetical protein Naga_101468g1, partial [Nannochloropsis gaditana]	[R] TWOG0189 Peroxidase	Peroxidase	L-ascorbate peroxidase 3 OS=Arabidopsis thaliana GN=APX3 PE=1 SV=1
Unigene68292_All	1701	-6.30119	5.74894e-20	2.22012e-19		hypothetical protein F511_09450 [Dorcoceras hygrometricum]		EPSP synthase (3-phosphoshikimate 1-carboxyvinyltransferase)				GO:0019277//UDP-N-acetylgalactosamine biosynthetic process;GO:0008760//UDP-N-acetylglucosamine 1-carboxyvinyltransferase activity;GO:0009536//plastid
Unigene22823_All	2268	-6.29179	4.6045e-38	2.77132e-37	K05658//ATP-binding cassette, subfamily B (MDR/TAP), member 1 [EC:7.6.2.2]+ko02010//ABC transporters;K05658//ATP-binding cassette, subfamily B (MDR/TAP), member 1 [EC:7.6.2.2]+ko02010//ABC transporters;K05658//ATP-binding cassette, subfamily B (MDR/TAP), member 1 [EC:7.6.2.2]+ko02010//ABC transporters;K05658//ATP-binding cassette, subfamily B (MDR/TAP), member 1 [EC:7.6.2.2]+ko02010//ABC transpor…	ABC transporter B family member 21-like [Phalaenopsis equestris] >XP_020573476.1 ABC transporter B family member 21-like [Phalaenopsis equestris] >XP_020573478.1 ABC transporter B family member 21-like [Phalaenopsis equestris] >XP_020573479.1 ABC transporter B family member 21-like [Phalaenopsis equestris]	[Q] KOG0055 Multidrug/pheromone exporter, ABC superfamily	HlyD family secretion protein	ABC transporter B family member 9 OS=Arabidopsis thaliana GN=ABCB9 PE=3 SV=2
Unigene19316_All	965	-6.29012	0	0		hypothetical protein NGA_0606400 [Nannochloropsis gaditana CCMP526] >EKU20642.1 hypothetical protein NGA_0606400 [Nannochloropsis gaditana CCMP526]		Tetratricopeptide repeat
Unigene36869_All	677	-6.28233	1.28549e-10	3.23736e-10				Protein of unknown function (DUF1326)
Unigene21245_All	565	-6.28233	1.28549e-10	3.23736e-10	K04688//ribosomal protein S6 kinase beta [EC:2.7.11.1];K13303//serum/glucocorticoid-regulated kinase 2 [EC:2.7.11.1];K04688//ribosomal protein S6 kinase beta [EC:2.7.11.1];K04688//ribosomal protein S6 kinase beta [EC:2.7.11.1]	RAC family serine/threonine-protein kinase [Phytophthora infestans T30-4] >EEY53149.1 RAC family serine/threonine-protein kinase [Phytophthora infestans T30-4]	[T] KOG0603 Ribosomal protein S6 kinase		Serine/threonine-protein kinase AtPK2/AtPK19 OS=Arabidopsis thaliana GN=ATPK2 PE=1 SV=2			GO:0046872//metal ion binding;GO:0005634//nucleus;GO:0004674//protein serine/threonine kinase activity;GO:0005524//ATP binding;GO:0035556//intracellular signal transduction;GO:0005737//cytoplasm
Unigene40106_All	824	-6.28233	1.28549e-10	3.23736e-10	K17987//next to BRCA1 gene 1 protein;K14439//SWI/SNF-related matrix-associated actin-dependent regulator of chromatin subfamily A containing DEAD/H box 1 [EC:3.6.4.12];K14306//nuclear pore complex protein Nup62+ko03013//RNA transport	hypothetical protein EMIHUDRAFT_123584, partial [Emiliania huxleyi CCMP1516] >EOD24909.1 hypothetical protein EMIHUDRAFT_123584, partial [Emiliania huxleyi CCMP1516]	[K] KOG1878 Nuclear receptor coregulator SMRT/SMRTER, contains Myb-like domains	WH1 domain	Flagellar radial spoke protein 2 OS=Chlamydomonas reinhardtii GN=RSP2 PE=1 SV=1			GO:0016021//integral component of membrane
Unigene43795_All	861	-6.28233	1.28549e-10	3.23736e-10	K01081//5'-nucleotidase [EC:3.1.3.5]+ko00230//Purine metabolism+ko01100//Metabolic pathways+ko00760//Nicotinate and nicotinamide metabolism+ko01110//Biosynthesis of secondary metabolites+ko00240//Pyrimidine metabolism;K01081//5'-nucleotidase [EC:3.1.3.5]+ko00230//Purine metabolism+ko01100//Metabolic pathways+ko00760//Nicotinate and nicotinamide metabolism+ko01110//Biosynthesis of secondary metabo…	unnamed protein product [Chondrus crispus] >CDF36024.1 unnamed protein product [Chondrus crispus]	[F] KOG4419 5' nucleotidase	5'-nucleotidase, C-terminal domain				GO:0016787//hydrolase activity;GO:0000166//nucleotide binding;GO:0009166//nucleotide catabolic process
Unigene75219_All	1101	-6.28233	1.28549e-10	3.23736e-10		hypothetical protein SDRG_08321 [Saprolegnia diclina VS20] >EQC34112.1 hypothetical protein SDRG_08321 [Saprolegnia diclina VS20]		Predicted permease
Unigene58946_All	932	-6.28233	1.28549e-10	3.23736e-10				Outer membrane efflux protein
Unigene68042_All	1245	-6.28233	1.28549e-10	3.23736e-10	K01952//phosphoribosylformylglycinamidine synthase [EC:6.3.5.3]+ko00230//Purine metabolism+ko01100//Metabolic pathways+ko01110//Biosynthesis of secondary metabolites;K01952//phosphoribosylformylglycinamidine synthase [EC:6.3.5.3]+ko00230//Purine metabolism+ko01100//Metabolic pathways+ko01110//Biosynthesis of secondary metabolites;K01952//phosphoribosylformylglycinamidine synthase [EC:6.3.5.3]+ko0…	phosphoribosylformylglycinamidine synthase (plastid) [Paulinella micropora] >AQX44697.1 phosphoribosylformylglycinamidine synthase (plastid) [Paulinella micropora]	[F] KOG1907 Phosphoribosylformylglycinamidine synthase	CobB/CobQ-like glutamine amidotransferase domain				GO:0004642//phosphoribosylformylglycinamidine synthase activity;GO:0006189//'de novo' IMP biosynthetic process
Unigene63055_All	1265	-6.28233	1.28549e-10	3.23736e-10	K20478//golgin subfamily B member 1;K10406//kinesin family member C2/C3;K10406//kinesin family member C2/C3;K20478//golgin subfamily B member 1;K06674//structural maintenance of chromosome 2	Carbohydrate binding module family 20 [Ostreococcus tauri]	[D] TWOG0657 Centrosomal protein	Hyaluronan mediated motility receptor N-terminal	Myosin-7 OS=Arabidopsis thaliana GN=XI-A PE=3 SV=1
Unigene16172_All	997	-6.28233	9.74061e-20	3.72832e-19	K13171//serine/arginine repetitive matrix protein 1+ko03015//mRNA surveillance pathway+ko03013//RNA transport;K13171//serine/arginine repetitive matrix protein 1+ko03015//mRNA surveillance pathway+ko03013//RNA transport;K13171//serine/arginine repetitive matrix protein 1+ko03015//mRNA surveillance pathway+ko03013//RNA transport;K13171//serine/arginine repetitive matrix protein 1+ko03015//mRNA sur…	splicing factor PWI domain-containing protein [Arabidopsis thaliana] >ANM62172.1 splicing factor PWI domain-containing protein [Arabidopsis thaliana]	[AR] KOG2146 Splicing coactivator SRm160/300, subunit SRm160 (contains PWI domain)	B12 binding domain				GO:0006397//mRNA processing
Unigene27802_All	1238	-6.28233	9.74061e-20	3.72832e-19				4Fe-4S dicluster domain
CL5866.Contig4_All	2108	-6.27772	2.52916e-57	2.04607e-56
Unigene47212_All	720	-6.26322	1.65224e-19	6.27915e-19		30S ribosomal protein S20 (chloroplast) [Fistulifera solaris] >BAK18933.1 30S ribosomal protein S20 (chloroplast) [Fistulifera solaris]			30S ribosomal protein S20, chloroplastic OS=Odontella sinensis GN=rps20 PE=3 SV=1			GO:0005840//ribosome;GO:0006412//translation;GO:0003735//structural constituent of ribosome;GO:0019843//rRNA binding;GO:0009507//chloroplast
CL3047.Contig2_All	869	-6.25783	1.80984e-10	4.51579e-10
Unigene5018_All	822	-6.25512	1.87895e-10	4.68261e-10	K09699//2-oxoisovalerate dehydrogenase E2 component (dihydrolipoyl transacylase) [EC:2.3.1.168]+ko00280//Valine, leucine and isoleucine degradation+ko00640//Propanoate metabolism+ko01100//Metabolic pathways+ko01110//Biosynthesis of secondary metabolites;K09699//2-oxoisovalerate dehydrogenase E2 component (dihydrolipoyl transacylase) [EC:2.3.1.168]+ko00280//Valine, leucine and isoleucine degradati…	Lipoamide acyltransferase component of branched-chain alpha-keto acid dehydrogenase complex [Phytophthora megakarya]	[C] KOG0558 Dihydrolipoamide transacylase (alpha-keto acid dehydrogenase E2 subunit)	Biotin-requiring enzyme	Lipoamide acyltransferase component of branched-chain alpha-keto acid dehydrogenase complex, mitochondrial OS=Arabidopsis thaliana GN=BCE2 PE=1 SV=1			GO:0008152//metabolic process;GO:0016746//transferase activity, transferring acyl groups
Unigene63247_All	512	-6.24386	2.19484e-10	5.4469e-10				Pentapeptide repeats (9 copies)
Unigene75027_All	829	-6.24386	2.19484e-10	5.4469e-10	K17987//next to BRCA1 gene 1 protein;K14325//RNA-binding protein with serine-rich domain 1+ko03015//mRNA surveillance pathway+ko03013//RNA transport;K14306//nuclear pore complex protein Nup62+ko03013//RNA transport	PREDICTED: LOW QUALITY PROTEIN: uncharacterized transmembrane protein DDB_G0289901 [Tarenaya hassleriana]	[S] LSE0099 A Uncharacterized protein
Unigene35656_All	658	-6.24386	2.19484e-10	5.4469e-10	K13171//serine/arginine repetitive matrix protein 1+ko03015//mRNA surveillance pathway+ko03013//RNA transport	PREDICTED: hornerin-like, partial [Ipomoea nil]		ChrR Cupin-like domain
Unigene73093_All	872	-6.24386	2.19484e-10	5.4469e-10	K22073//transferase CAF17, mitochondrial [EC:2.1.-.-]	predicted protein [Ostreococcus lucimarinus CCE9901] >ABP00696.1 predicted protein [Ostreococcus lucimarinus CCE9901]	[K] KOG2929 Transcription factor, component of CCR4 transcriptional complex	Glycine cleavage T-protein C-terminal barrel domain	Putative transferase At4g12130, mitochondrial OS=Arabidopsis thaliana GN=At4g12130 PE=1 SV=1			GO:0016740//transferase activity
Unigene73243_All	955	-6.24386	2.19484e-10	5.4469e-10	K00948//ribose-phosphate pyrophosphokinase [EC:2.7.6.1]+ko00230//Purine metabolism+ko00030//Pentose phosphate pathway+ko01230//Biosynthesis of amino acids+ko01100//Metabolic pathways+ko01110//Biosynthesis of secondary metabolites+ko01200//Carbon metabolism;K00948//ribose-phosphate pyrophosphokinase [EC:2.7.6.1]+ko00230//Purine metabolism+ko00030//Pentose phosphate pathway+ko01230//Biosynthesis of…	ribose-phosphate pyrophosphokinase 1 isoform X1 [Amborella trichopoda]	[FE] KOG1448 Ribose-phosphate pyrophosphokinase	N-terminal domain of ribose phosphate pyrophosphokinase	Ribose-phosphate pyrophosphokinase 1, chloroplastic OS=Oryza sativa subsp. japonica GN=Os02g0127700 PE=2 SV=2			GO:0000287//magnesium ion binding;GO:0004749//ribose phosphate diphosphokinase activity;GO:0009116//nucleoside metabolic process;GO:0009165//nucleotide biosynthetic process;GO:0016301//kinase activity;GO:0009156//ribonucleoside monophosphate biosynthetic process
Unigene36900_All	991	-6.24386	2.19484e-10	5.4469e-10	K13171//serine/arginine repetitive matrix protein 1+ko03015//mRNA surveillance pathway+ko03013//RNA transport	hypothetical protein AURANDRAFT_66700 [Aureococcus anophagefferens] >EGB05060.1 hypothetical protein AURANDRAFT_66700 [Aureococcus anophagefferens]		Metallo-beta-lactamase superfamily
Unigene20861_All	1138	-6.24386	2.19484e-10	5.4469e-10				Protein of unknown function, DUF488
CL3919.Contig1_All	871	-6.24347	2.20664e-10	5.47509e-10	K06627//cyclin-A;K14306//nuclear pore complex protein Nup62+ko03013//RNA transport	phenylalanyl-tRNA synthetase beta chain, putative [Ricinus communis]		Ferredoxin-fold anticodon binding domain	Phenylalanine--tRNA ligase beta subunit, chloroplastic OS=Pyropia yezoensis GN=pheT PE=3 SV=1			GO:0000287//magnesium ion binding;GO:0006432//phenylalanyl-tRNA aminoacylation;GO:0004826//phenylalanine-tRNA ligase activity;GO:0005524//ATP binding;GO:0000049//tRNA binding;GO:0009536//plastid
Unigene16945_All	690	-6.23734	2.82019e-54	2.19645e-53	K02184//formin 2;K00430//peroxidase [EC:1.11.1.7]+ko01100//Metabolic pathways+ko01110//Biosynthesis of secondary metabolites+ko00940//Phenylpropanoid biosynthesis;K00430//peroxidase [EC:1.11.1.7]+ko01100//Metabolic pathways+ko01110//Biosynthesis of secondary metabolites+ko00940//Phenylpropanoid biosynthesis;K19720//collagen, type III, alpha+ko04933//AGE-RAGE signaling pathway in diabetic complica…	hypothetical protein BU14_0180s0014, partial [Porphyra umbilicalis]	[R] LSE0105 H Scavenger receptor with C-type lectin	Lectin C-type domain	Proline-rich receptor-like protein kinase PERK2 OS=Arabidopsis thaliana GN=PERK2 PE=2 SV=3			GO:0009055//electron transfer activity
Unigene17559_All	1317	-6.23408	1.08025e-36	6.34355e-36	K14306//nuclear pore complex protein Nup62+ko03013//RNA transport;K14306//nuclear pore complex protein Nup62+ko03013//RNA transport;K14306//nuclear pore complex protein Nup62+ko03013//RNA transport;K14306//nuclear pore complex protein Nup62+ko03013//RNA transport;K14306//nuclear pore complex protein Nup62+ko03013//RNA transport	PREDICTED: angiomotin-like [Gossypium hirsutum]	[T] LSE0513 C 7-transmembrane receptor	Porin subfamily	Nuclear pore complex protein NUP62 OS=Arabidopsis thaliana GN=NUP62 PE=1 SV=1
Unigene39722_All	497	-6.22423	4.77011e-19	1.77884e-18
Unigene31598_All	1041	-6.22423	1.83126e-36	1.07019e-35	K22020//mucin-19;K02184//formin 2;K02184//formin 2;K02184//formin 2;K16628//collagen, type VII, alpha	hypothetical protein BU14_0357s0005 [Porphyra umbilicalis]	[T] KOG3575 FOG: Hormone receptors		Formin-like protein 3 OS=Oryza sativa subsp. japonica GN=FH3 PE=2 SV=2
Unigene20250_All	821	-6.22423	4.77011e-19	1.77884e-18		abhydrolase [Emiliania huxleyi CCMP1516] >EOD37177.1 abhydrolase [Emiliania huxleyi CCMP1516]	[R] KOG2382 Predicted alpha/beta hydrolase	Low temperature viability protein				GO:0016787//hydrolase activity
Unigene37233_All	970	-6.22225	2.94877e-10	7.27075e-10				Domain of unknown function (DUF4983)
CL7989.Contig2_All	667	-6.21789	3.12844e-10	7.69697e-10		NLI interacting factor-like phosphatase [Medicago truncatula] >AES92123.2 NLI interacting factor-like phosphatase [Medicago truncatula]		5' nucleotidase, deoxy (Pyrimidine), cytosolic type C protein (NT5C)				GO:0008253//5'-nucleotidase activity;GO:0009264//deoxyribonucleotide catabolic process
Unigene45190_All	2173	-6.21431	3.10611e-36	1.80544e-35	K03797//carboxyl-terminal processing protease [EC:3.4.21.102];K03797//carboxyl-terminal processing protease [EC:3.4.21.102];K03797//carboxyl-terminal processing protease [EC:3.4.21.102];K03797//carboxyl-terminal processing protease [EC:3.4.21.102]	Peptidase_S41-domain-containing protein [Fragilariopsis cylindrus CCMP1102]		Peptidase family S41	Carboxyl-terminal-processing peptidase 3, chloroplastic OS=Arabidopsis thaliana GN=CTPA3 PE=3 SV=1			GO:0016021//integral component of membrane;GO:0008236//serine-type peptidase activity
Unigene74209_All	558	-6.20433	3.75671e-10	9.19448e-10
Unigene68927_All	692	-6.20433	3.75671e-10	9.19448e-10	K01166//ribonuclease T2 [EC:3.1.27.1];K01166//ribonuclease T2 [EC:3.1.27.1];K01166//ribonuclease T2 [EC:3.1.27.1];K01166//ribonuclease T2 [EC:3.1.27.1];K01166//ribonuclease T2 [EC:3.1.27.1]	ribonuclease 2-like isoform X2 [Helianthus annuus]	[A] KOG1869 Splicing coactivator SRm160/300, subunit SRm300	Ribonuclease T2 family	Intracellular ribonuclease LX OS=Solanum lycopersicum GN=RNALX PE=1 SV=2			GO:0003723//RNA binding;GO:0016021//integral component of membrane;GO:0033897//ribonuclease T2 activity
Unigene60862_All	700	-6.20433	3.75671e-10	9.19448e-10				HemY protein N-terminus
Unigene28808_All	563	-6.20433	3.75671e-10	9.19448e-10	K11352//NADH dehydrogenase (ubiquinone) 1 alpha subcomplex subunit 12+ko01100//Metabolic pathways+ko00190//Oxidative phosphorylation;K11352//NADH dehydrogenase (ubiquinone) 1 alpha subcomplex subunit 12+ko01100//Metabolic pathways+ko00190//Oxidative phosphorylation;K11352//NADH dehydrogenase (ubiquinone) 1 alpha subcomplex subunit 12+ko01100//Metabolic pathways+ko00190//Oxidative phosphorylation;…	NADH dehydrogenase (ubiquinone) 1 alpha subcomplex 12 [Klebsormidium nitens]	[C] KOG3382 NADH:ubiquinone oxidoreductase, B17.2 subunit	NADH ubiquinone oxidoreductase subunit NDUFA12	Probable NADH dehydrogenase [ubiquinone] 1 alpha subcomplex subunit 12 OS=Arabidopsis thaliana GN=At3g03100 PE=1 SV=1			GO:0009055//electron transfer activity;GO:0050897//cobalt ion binding;GO:0006979//response to oxidative stress;GO:0005747//mitochondrial respiratory chain complex I;GO:0005743//mitochondrial inner membrane;GO:0009735//response to cytokinin;GO:0070469//respiratory chain;GO:0008137//NADH dehydrogenase (ubiquinone) activity
Unigene72918_All	1092	-6.20433	3.75671e-10	9.19448e-10	K13171//serine/arginine repetitive matrix protein 1+ko03015//mRNA surveillance pathway+ko03013//RNA transport;K13171//serine/arginine repetitive matrix protein 1+ko03015//mRNA surveillance pathway+ko03013//RNA transport;K13171//serine/arginine repetitive matrix protein 1+ko03015//mRNA surveillance pathway+ko03013//RNA transport;K14325//RNA-binding protein with serine-rich domain 1+ko03015//mRNA s…	Succinyl-diaminopimelate desuccinylase, partial [Cajanus cajan]	[E] KOG2275 Aminoacylase ACY1 and related metalloexopeptidases	Peptidase family M20/M25/M40				GO:0008237//metallopeptidase activity;GO:0005509//calcium ion binding
Unigene64276_All	1176	-6.20433	3.75671e-10	9.19448e-10		hypothetical protein AURANDRAFT_71291, partial [Aureococcus anophagefferens] >EGB09872.1 hypothetical protein AURANDRAFT_71291, partial [Aureococcus anophagefferens]		Predicted permease YjgP/YjgQ family
Unigene43084_All	1050	-6.20433	5.27141e-36	3.04587e-35	K13171//serine/arginine repetitive matrix protein 1+ko03015//mRNA surveillance pathway+ko03013//RNA transport	PREDICTED: nitrate/nitrite response regulator protein NarL-like [Ziziphus jujuba]		Response regulator receiver domain
Unigene61230_All	1387	-6.20433	8.11913e-19	3.00251e-18	K00457//4-hydroxyphenylpyruvate dioxygenase [EC:1.13.11.27]+ko00130//Ubiquinone and other terpenoid-quinone biosynthesis+ko00350//Tyrosine metabolism+ko01100//Metabolic pathways+ko00360//Phenylalanine metabolism;K00457//4-hydroxyphenylpyruvate dioxygenase [EC:1.13.11.27]+ko00130//Ubiquinone and other terpenoid-quinone biosynthesis+ko00350//Tyrosine metabolism+ko01100//Metabolic pathways+ko00360//…	4-hydroxyphenylpyruvate dioxygenase, 4HPPD [Dorcoceras hygrometricum]	[E] KOG0638 4-hydroxyphenylpyruvate dioxygenase	Hydroxyphenylpyruvate dioxygenase, HPPD, N-terminal	4-hydroxyphenylpyruvate dioxygenase OS=Plectranthus scutellarioides PE=2 SV=1			GO:0009072//aromatic amino acid family metabolic process;GO:0046872//metal ion binding;GO:0003868//4-hydroxyphenylpyruvate dioxygenase activity
Unigene61228_All	2163	-6.20433	8.11913e-19	3.00251e-18	K22020//mucin-19	mannose-1-phosphate guanylyltransferase, putative, partial [Ricinus communis]		Mannose-6-phosphate isomerase				GO:0016779//nucleotidyltransferase activity;GO:0000271//polysaccharide biosynthetic process;GO:0009536//plastid
Unigene31599_All	720	-6.18415	1.92246e-52	1.46357e-51				FG-GAP repeat
Unigene71455_All	1943	-6.18415	1.38356e-18	5.08212e-18	K20530//type IV secretion system protein TrbE	conjugal transfer protein TraB [Ostreococcus tauri]		Type II/IV secretion system protein				GO:0006810//transport;GO:0030255//protein secretion by the type IV secretion system;GO:0005524//ATP binding;GO:0016021//integral component of membrane;GO:0009405//pathogenesis;GO:0005737//cytoplasm
Unigene73476_All	2032	-6.18415	1.38356e-18	5.08212e-18		LOW QUALITY PROTEIN: hypothetical protein BU14_0066s0027 [Porphyra umbilicalis]	[A] KOG1869 Splicing coactivator SRm160/300, subunit SRm300	Tetratricopeptide repeat
Unigene31268_All	1230	-6.18415	1.38356e-18	5.08212e-18				TonB dependent receptor
Unigene41209_All	2363	-6.17736	3.2642e-52	2.47632e-51				MotA/TolQ/ExbB proton channel family
Unigene23519_All	1427	-6.17396	2.58538e-35	1.47112e-34	K00253//isovaleryl-CoA dehydrogenase [EC:1.3.8.4]+ko00280//Valine, leucine and isoleucine degradation+ko01100//Metabolic pathways;K00253//isovaleryl-CoA dehydrogenase [EC:1.3.8.4]+ko00280//Valine, leucine and isoleucine degradation+ko01100//Metabolic pathways;K00253//isovaleryl-CoA dehydrogenase [EC:1.3.8.4]+ko00280//Valine, leucine and isoleucine degradation+ko01100//Metabolic pathways;K00253//i…	unnamed protein product [Albugo candida]	[EI] KOG0141 Isovaleryl-CoA dehydrogenase	Acyl-CoA dehydrogenase, N-terminal domain	Isovaleryl-CoA dehydrogenase, mitochondrial OS=Arabidopsis thaliana GN=IVD PE=1 SV=2			GO:0016627//oxidoreductase activity, acting on the CH-CH group of donors;GO:0050660//flavin adenine dinucleotide binding;GO:0003995//acyl-CoA dehydrogenase activity
Unigene3491_All	1051	-6.17293	1.85583e-18	6.78378e-18
Unigene36566_All	1143	-6.17012	5.06413e-29	2.51741e-28		predicted protein, partial [Phaeodactylum tricornutum CCAP 1055/1] >EEC47019.1 predicted protein, partial [Phaeodactylum tricornutum CCAP 1055/1]	[S] KOG3864 Uncharacterized conserved protein	Leucine Rich repeats (2 copies)
Unigene59317_All	530	-6.16369	6.44632e-10	1.55416e-09	K00759//adenine phosphoribosyltransferase [EC:2.4.2.7]+ko00230//Purine metabolism+ko01100//Metabolic pathways;K00759//adenine phosphoribosyltransferase [EC:2.4.2.7]+ko00230//Purine metabolism+ko01100//Metabolic pathways;K00759//adenine phosphoribosyltransferase [EC:2.4.2.7]+ko00230//Purine metabolism+ko01100//Metabolic pathways;K00759//adenine phosphoribosyltransferase [EC:2.4.2.7]+ko00230//Purin…	adenine phosphoribosyltransferase [Coccomyxa subellipsoidea C-169] >EIE25769.1 adenine phosphoribosyltransferase [Coccomyxa subellipsoidea C-169]	[F] KOG1712 Adenine phosphoribosyl transferases	Phosphoribosyl transferase domain	Adenine phosphoribosyltransferase 1 OS=Triticum aestivum GN=APT1 PE=2 SV=1			GO:0003999//adenine phosphoribosyltransferase activity;GO:0009116//nucleoside metabolic process;GO:0006168//adenine salvage;GO:0005737//cytoplasm
Unigene58955_All	621	-6.16369	6.44632e-10	1.55416e-09	K14325//RNA-binding protein with serine-rich domain 1+ko03015//mRNA surveillance pathway+ko03013//RNA transport;K14325//RNA-binding protein with serine-rich domain 1+ko03015//mRNA surveillance pathway+ko03013//RNA transport	serine/arginine-rich splicing factor SR45 isoform X2 [Helianthus annuus]		Bacterial extracellular solute-binding protein, family 7
Unigene66723_All	758	-6.16369	6.44632e-10	1.55416e-09	K09566//peptidyl-prolyl isomerase G (cyclophilin G) [EC:5.2.1.8]	conserved hypothetical protein, partial [Ricinus communis]		Bacterial transcriptional regulator				GO:0003677//DNA binding;GO:0008152//metabolic process;GO:0006355//regulation of transcription, DNA-templated;GO:0016874//ligase activity
Unigene28241_All	637	-6.16369	6.44632e-10	1.55416e-09	K00456//cysteine dioxygenase [EC:1.13.11.20]+ko00430//Taurine and hypotaurine metabolism+ko01100//Metabolic pathways+ko00270//Cysteine and methionine metabolism;K00456//cysteine dioxygenase [EC:1.13.11.20]+ko00430//Taurine and hypotaurine metabolism+ko01100//Metabolic pathways+ko00270//Cysteine and methionine metabolism;K00456//cysteine dioxygenase [EC:1.13.11.20]+ko00430//Taurine and hypotaurine…	hypothetical protein H310_09211 [Aphanomyces invadans] >ETV97889.1 hypothetical protein H310_09211 [Aphanomyces invadans]		Cysteine dioxygenase type I				GO:0016702//oxidoreductase activity, acting on single donors with incorporation of molecular oxygen, incorporation of two atoms of oxygen;GO:0005506//iron ion binding
Unigene71296_All	863	-6.16369	6.44632e-10	1.55416e-09	K13171//serine/arginine repetitive matrix protein 1+ko03015//mRNA surveillance pathway+ko03013//RNA transport;K13171//serine/arginine repetitive matrix protein 1+ko03015//mRNA surveillance pathway+ko03013//RNA transport;K14325//RNA-binding protein with serine-rich domain 1+ko03015//mRNA surveillance pathway+ko03013//RNA transport	PREDICTED: serine/arginine repetitive matrix protein 1 [Ricinus communis]	[A] KOG1869 Splicing coactivator SRm160/300, subunit SRm300	Bacterial conjugation TrbI-like protein
Unigene3790_All	1661	-6.16369	2.3605e-18	8.59677e-18		hypothetical protein AURANDRAFT_71291, partial [Aureococcus anophagefferens] >EGB09872.1 hypothetical protein AURANDRAFT_71291, partial [Aureococcus anophagefferens]
Unigene68942_All	1207	-6.16369	6.44632e-10	1.55416e-09	K00254//dihydroorotate dehydrogenase [EC:1.3.5.2]+ko01100//Metabolic pathways+ko00240//Pyrimidine metabolism;K00254//dihydroorotate dehydrogenase [EC:1.3.5.2]+ko01100//Metabolic pathways+ko00240//Pyrimidine metabolism;K00254//dihydroorotate dehydrogenase [EC:1.3.5.2]+ko01100//Metabolic pathways+ko00240//Pyrimidine metabolism;K00254//dihydroorotate dehydrogenase [EC:1.3.5.2]+ko01100//Metabolic pat…	dihydroorotate oxidase [Saprolegnia diclina VS20] >EQC33802.1 dihydroorotate oxidase [Saprolegnia diclina VS20]	[F] KOG1436 Dihydroorotate dehydrogenase	Dihydroorotate dehydrogenase	Dihydroorotate dehydrogenase (quinone), mitochondrial OS=Arabidopsis thaliana GN=PYRD PE=1 SV=2			GO:0004152//dihydroorotate dehydrogenase activity;GO:0044205//'de novo' UMP biosynthetic process;GO:0005743//mitochondrial inner membrane;GO:0006207//'de novo' pyrimidine nucleobase biosynthetic process
Unigene20626_All	674	-6.16369	6.44632e-10	1.55416e-09				'Cold-shock' DNA-binding domain		CSD
Unigene72400_All	1200	-6.16369	6.44632e-10	1.55416e-09	K00817//histidinol-phosphate aminotransferase [EC:2.6.1.9]+ko01230//Biosynthesis of amino acids+ko00960//Tropane, piperidine and pyridine alkaloid biosynthesis+ko00350//Tyrosine metabolism+ko01100//Metabolic pathways+ko00340//Histidine metabolism+ko01110//Biosynthesis of secondary metabolites+ko00400//Phenylalanine, tyrosine and tryptophan biosynthesis+ko00360//Phenylalanine metabolism;K00817//hi…	histidinol-phosphate aminotransferase [Ostreococcus tauri]	[E] KOG0257 Kynurenine aminotransferase, glutamine transaminase K	Aminotransferase class I and II	Anther-specific proline-rich protein APG OS=Arabidopsis thaliana GN=APG PE=2 SV=2			GO:0000105//histidine biosynthetic process;GO:0004400//histidinol-phosphate transaminase activity;GO:0030170//pyridoxal phosphate binding
Unigene73345_All	1072	-6.16369	6.44632e-10	1.55416e-09				Bacterial extracellular solute-binding protein, family 7
CL7524.Contig1_All	2145	-6.16369	4.39762e-35	2.49205e-34		unnamed protein product [Chondrus crispus] >CDF40885.1 unnamed protein product [Chondrus crispus]		Putative transmembrane protein (Alph_Pro_TM)	Sulfite exporter TauE/SafE family protein 3 OS=Arabidopsis thaliana GN=At2g25737 PE=2 SV=1			GO:0016021//integral component of membrane
Unigene47862_All	472	-6.16369	2.3605e-18	8.59677e-18				Type III flagellar switch regulator (C-ring) FliN C-term
CL3526.Contig1_All	1153	-6.15749	6.99172e-10	1.68198e-09	K00574//cyclopropane-fatty-acyl-phospholipid synthase [EC:2.1.1.79];K00574//cyclopropane-fatty-acyl-phospholipid synthase [EC:2.1.1.79];K00574//cyclopropane-fatty-acyl-phospholipid synthase [EC:2.1.1.79];K00574//cyclopropane-fatty-acyl-phospholipid synthase [EC:2.1.1.79];K00574//cyclopropane-fatty-acyl-phospholipid synthase [EC:2.1.1.79]	putative cyclopropane-fatty-acyl-phospholipid synthase [Ostreococcus tauri]	[R] TWOG0003 Methyltransferases	Mycolic acid cyclopropane synthetase	Probable tocopherol O-methyltransferase, chloroplastic OS=Oryza sativa subsp. japonica GN=VTE4 PE=2 SV=1			GO:0008610//lipid biosynthetic process
Unigene77625_All	678	-6.14585	8.13754e-10	1.94942e-09				MmoB/DmpM family
CL8072.Contig1_All	1339	-6.1446	8.27104e-10	1.98064e-09	K08653//membrane-bound transcription factor site-1 protease [EC:3.4.21.112]+ko04141//Protein processing in endoplasmic reticulum;K08653//membrane-bound transcription factor site-1 protease [EC:3.4.21.112]+ko04141//Protein processing in endoplasmic reticulum;K08653//membrane-bound transcription factor site-1 protease [EC:3.4.21.112]+ko04141//Protein processing in endoplasmic reticulum;K08653//memb…	Thermitase [Symbiodinium microadriaticum]	[O] KOG1153 Subtilisin-related protease/Vacuolar protease B	Subtilase family	Subtilisin-like protease SBT4.12 OS=Arabidopsis thaliana GN=SBT4.12 PE=2 SV=1
CL1661.Contig4_All	514	-6.14312	4.13895e-20	1.60623e-19
Unigene61952_All	626	-6.14167	8.59119e-10	2.05454e-09
CL2908.Contig1_All	661	-6.14105	4.2314e-18	1.52466e-17
CL9330.Contig1_All	1153	-6.1358	9.26952e-10	2.21165e-09	K08145//MFS transporter, SP family, solute carrier family 2 (facilitated glucose transporter), member 8	hypothetical protein EMIHUDRAFT_310007 [Emiliania huxleyi CCMP1516] >EOD27147.1 hypothetical protein EMIHUDRAFT_310007 [Emiliania huxleyi CCMP1516]	[R] KOG2615 Permease of the major facilitator superfamily	Major Facilitator Superfamily				GO:0055085//transmembrane transport;GO:0016021//integral component of membrane;GO:0005215//transporter activity
Unigene20463_All	1181	-6.12892	1.34215e-50	9.94526e-50	K08081//tropinone reductase I [EC:1.1.1.206]+ko00960//Tropane, piperidine and pyridine alkaloid biosynthesis+ko01100//Metabolic pathways+ko01110//Biosynthesis of secondary metabolites;K08081//tropinone reductase I [EC:1.1.1.206]+ko00960//Tropane, piperidine and pyridine alkaloid biosynthesis+ko01100//Metabolic pathways+ko01110//Biosynthesis of secondary metabolites;K08081//tropinone reductase I […	short chain dehydrogenase [Chrysochromulina sp. CCMP291]	[R] KOG0725 Reductases with broad range of substrate specificities	Enoyl-(Acyl carrier protein) reductase	Tropinone reductase homolog At2g29310 OS=Arabidopsis thaliana GN=At2g29310 PE=2 SV=1
CL10963.Contig2_All	1873	-6.12483	1.0676e-09	2.53774e-09	K07466//replication factor A1+ko03420//Nucleotide excision repair+ko03030//DNA replication+ko03440//Homologous recombination+ko03430//Mismatch repair;K07466//replication factor A1+ko03420//Nucleotide excision repair+ko03030//DNA replication+ko03440//Homologous recombination+ko03430//Mismatch repair;K07466//replication factor A1+ko03420//Nucleotide excision repair+ko03030//DNA replication+ko03440/…	replication protein a 70 kda dna-binding subunit [Nannochloropsis gaditana]	[L] KOG0851 Single-stranded DNA-binding replication protein A (RPA), large (70 kD) subunit and related ssDNA-binding proteins	Replication factor-A C terminal domain	Replication protein A 70 kDa DNA-binding subunit D OS=Arabidopsis thaliana GN=RPA1D PE=2 SV=1			GO:0003677//DNA binding;GO:0005634//nucleus;GO:0006281//DNA repair;GO:0006260//DNA replication;GO:0006310//DNA recombination
Unigene75465_All	749	-6.12187	6.89578e-18	2.46167e-17	K14492//two-component response regulator ARR-A family+ko04075//Plant hormone signal transduction;K01213//galacturan 1,4-alpha-galacturonidase [EC:3.2.1.67]+ko00040//Pentose and glucuronate interconversions+ko01100//Metabolic pathways;K12418//acyl-lipid (7-3)-desaturase (Delta-4 desaturase) [EC:1.14.19.31]	hypothetical protein GPECTOR_7g1006 [Gonium pectorale]	[S] LSE0402 A Uncharacterized protein	Protein of unknown function (DUF1777)	Early nodulin-20 OS=Medicago truncatula GN=ENOD20 PE=3 SV=1		XM_014046390.1 Monoraphidium neglectum hypothetical protein mRNA	GO:0016021//integral component of membrane
Unigene27864_All	458	-6.12187	1.10903e-09	2.63066e-09				Bacterial aa3 type cytochrome c oxidase subunit IV
Unigene68968_All	831	-6.12187	1.10903e-09	2.63066e-09				Protein of unknown function (DUF1523)
Unigene40354_All	632	-6.12187	1.10903e-09	2.63066e-09	K00826//branched-chain amino acid aminotransferase [EC:2.6.1.42]+ko00290//Valine, leucine and isoleucine biosynthesis+ko00280//Valine, leucine and isoleucine degradation+ko00770//Pantothenate and CoA biosynthesis+ko01230//Biosynthesis of amino acids+ko01100//Metabolic pathways+ko01110//Biosynthesis of secondary metabolites+ko01210//2-Oxocarboxylic acid metabolism+ko00270//Cysteine and methionine …	hypothetical protein GUITHDRAFT_86282 [Guillardia theta CCMP2712] >EKX47543.1 hypothetical protein GUITHDRAFT_86282 [Guillardia theta CCMP2712]	[E] KOG0975 Branched chain aminotransferase BCAT1, pyridoxal phosphate enzymes type IV superfamily	Amino-transferase class IV	Branched-chain-amino-acid aminotransferase 2, chloroplastic OS=Arabidopsis thaliana GN=BCAT2 PE=1 SV=1			GO:0052654//L-leucine transaminase activity;GO:0052656//L-isoleucine transaminase activity;GO:0052655//L-valine transaminase activity;GO:0009082//branched-chain amino acid biosynthetic process
Unigene59237_All	1033	-6.12187	1.10903e-09	2.63066e-09				Saccharopine dehydrogenase C-terminal domain
Unigene61704_All	801	-6.12187	1.10903e-09	2.63066e-09		hypothetical protein CEUSTIGMA_g4585.t1 [Chlamydomonas eustigma]	[WV] KOG1216 von Willebrand factor and related coagulation proteins	NMT1-like family
Unigene59414_All	1022	-6.12187	1.10903e-09	2.63066e-09	K13172//serine/arginine repetitive matrix protein 2	PREDICTED: outer membrane protein TolC [Ricinus communis]		Outer membrane efflux protein
Unigene62006_All	1038	-6.12187	1.10903e-09	2.63066e-09				PAP2 superfamily
Unigene59881_All	1127	-6.12187	1.10903e-09	2.63066e-09	K10765//alkylated DNA repair protein alkB homolog 1 [EC:1.14.11.51 4.2.99.18 1.14.11.-];K10765//alkylated DNA repair protein alkB homolog 1 [EC:1.14.11.51 4.2.99.18 1.14.11.-];K10765//alkylated DNA repair protein alkB homolog 1 [EC:1.14.11.51 4.2.99.18 1.14.11.-];K10765//alkylated DNA repair protein alkB homolog 1 [EC:1.14.11.51 4.2.99.18 1.14.11.-];K10765//alkylated DNA repair protein alkB homol…	uncharacterized protein LOC110880228 [Helianthus annuus]	[A] KOG2731 DNA alkylation damage repair protein	2OG-Fe(II) oxygenase superfamily	Alpha-ketoglutarate-dependent dioxygenase alkB OS=Arabidopsis thaliana GN=At1g11780 PE=2 SV=2
CL5352.Contig1_All	1173	-6.12187	1.10903e-09	2.63066e-09				Molybdopterin oxidoreductase
Unigene70467_All	1345	-6.12187	1.10903e-09	2.63066e-09	K19719//collagen, type II, alpha;K14325//RNA-binding protein with serine-rich domain 1+ko03015//mRNA surveillance pathway+ko03013//RNA transport;K13171//serine/arginine repetitive matrix protein 1+ko03015//mRNA surveillance pathway+ko03013//RNA transport;K22020//mucin-19;K14325//RNA-binding protein with serine-rich domain 1+ko03015//mRNA surveillance pathway+ko03013//RNA transport	hypothetical protein BU14_0694s0004 [Porphyra umbilicalis]	[Z] KOG4462 WASP-interacting protein VRP1/WIP, contains WH2 domain	HAMP domain
Unigene24450_All	1060	-6.12187	1.10903e-09	2.63066e-09	K19788//obg-like ATPase 1;K19788//obg-like ATPase 1;K19788//obg-like ATPase 1;K19788//obg-like ATPase 1	PREDICTED: ribosome-binding ATPase YchF-like [Gossypium hirsutum]	[R] KOG1491 Predicted GTP-binding protein (ODN superfamily)	Protein of unknown function (DUF933)	GTP-binding protein OBGC, chloroplastic OS=Arabidopsis thaliana GN=OBGL PE=2 SV=1			GO:0043022//ribosome binding;GO:0005524//ATP binding;GO:0043023//ribosomal large subunit binding;GO:0005525//GTP binding;GO:0005737//cytoplasm;GO:0016887//ATPase activity
Unigene27562_All	808	-6.12187	1.10903e-09	2.63066e-09
CL6086.Contig3_All	643	-6.11804	7.59608e-18	2.70565e-17		LOW QUALITY PROTEIN: hypothetical protein BU14_0032s0068 [Porphyra umbilicalis]
CL9226.Contig2_All	642	-6.10479	1.37884e-09	3.24868e-09				ELMO/CED-12 family
Unigene39738_All	517	-6.10049	1.18078e-17	4.17234e-17
Unigene27716_All	825	-6.10049	1.18078e-17	4.17234e-17	K00060//threonine 3-dehydrogenase [EC:1.1.1.103]+ko00260//Glycine, serine and threonine metabolism;K00083//cinnamyl-alcohol dehydrogenase [EC:1.1.1.195]+ko01100//Metabolic pathways+ko01110//Biosynthesis of secondary metabolites+ko00940//Phenylpropanoid biosynthesis;K00083//cinnamyl-alcohol dehydrogenase [EC:1.1.1.195]+ko01100//Metabolic pathways+ko01110//Biosynthesis of secondary metabolites+ko00…	l-threonine 3-dehydrogenase [Chrysochromulina sp. CCMP291]	[Q] KOG0022 Alcohol dehydrogenase, class III	Alcohol dehydrogenase GroES-like domain	Probable cinnamyl alcohol dehydrogenase 8D OS=Oryza sativa subsp. japonica GN=CAD8D PE=2 SV=1			GO:0004022//alcohol dehydrogenase (NAD) activity
Unigene46732_All	2629	-6.10049	1.25876e-65	1.12585e-64	K17987//next to BRCA1 gene 1 protein;K14325//RNA-binding protein with serine-rich domain 1+ko03015//mRNA surveillance pathway+ko03013//RNA transport;K14325//RNA-binding protein with serine-rich domain 1+ko03015//mRNA surveillance pathway+ko03013//RNA transport;K14325//RNA-binding protein with serine-rich domain 1+ko03015//mRNA surveillance pathway+ko03013//RNA transport;K08653//membrane-bound tra…	hypothetical protein BU14_0415s0013 [Porphyra umbilicalis]	[O] KOG1153 Subtilisin-related protease/Vacuolar protease B	Subtilase family				GO:0004252//serine-type endopeptidase activity
Unigene21371_All	547	-6.10049	1.18078e-17	4.17234e-17
CL3251.Contig17_All	1516	-6.09949	2.01653e-243	4.87898e-242		PREDICTED: auxin response factor 7-like [Lupinus angustifolius] >XP_019443458.1 PREDICTED: auxin response factor 7-like [Lupinus angustifolius] >OIW19343.1 hypothetical protein TanjilG_03477 [Lupinus angustifolius]		Archaea-specific editing domain of threonyl-tRNA synthetase
Unigene64348_All	1223	-6.09748	1.51274e-09	3.55556e-09				Peptidase family M1
Unigene71239_All	4196	-6.09385	5.53151e-208	1.18343e-206	K01810//glucose-6-phosphate isomerase [EC:5.3.1.9]+ko00010//Glycolysis / Gluconeogenesis+ko00030//Pentose phosphate pathway+ko00520//Amino sugar and nucleotide sugar metabolism+ko01100//Metabolic pathways+ko00500//Starch and sucrose metabolism+ko01110//Biosynthesis of secondary metabolites+ko01200//Carbon metabolism;K01810//glucose-6-phosphate isomerase [EC:5.3.1.9]+ko00010//Glycolysis / Gluconeo…	cytosolic glucose-6-phosphate isomerase [Pavlova lutheri]	[G] KOG2446 Glucose-6-phosphate isomerase	Phosphoglucose isomerase	Glucose-6-phosphate isomerase, cytosolic OS=Spinacia oleracea GN=PGIC PE=2 SV=2		KY085906.1 Piper auritum plastid, complete genome	GO:0004347//glucose-6-phosphate isomerase activity;GO:0006094//gluconeogenesis;GO:0006096//glycolytic process
CL4137.Contig1_All	799	-6.08969	1.66886e-09	3.91123e-09				Domain of unknown function (DUF4167)
Unigene47896_All	2128	-6.0788	8.39286e-112	1.10954e-110	K02045//sulfate transport system ATP-binding protein [EC:3.6.3.25]+ko00920//Sulfur metabolism+ko02010//ABC transporters;K02045//sulfate transport system ATP-binding protein [EC:3.6.3.25]+ko00920//Sulfur metabolism+ko02010//ABC transporters;K02045//sulfate transport system ATP-binding protein [EC:3.6.3.25]+ko00920//Sulfur metabolism+ko02010//ABC transporters	PREDICTED: glycine betaine transport ATP-binding protein OpuAA-like [Gossypium hirsutum]	[Q] KOG0055 Multidrug/pheromone exporter, ABC superfamily	Substrate binding domain of ABC-type glycine betaine transport system	Probable sulfate/thiosulfate import ATP-binding protein CysA OS=Chlorella vulgaris GN=cysA PE=3 SV=1			GO:0016020//membrane;GO:0005524//ATP binding;GO:0042626//ATPase activity, coupled to transmembrane movement of substances;GO:0016887//ATPase activity;GO:0009507//chloroplast
Unigene69794_All	375	-6.0788	1.91305e-09	4.46521e-09	K00012//UDPglucose 6-dehydrogenase [EC:1.1.1.22]+ko00520//Amino sugar and nucleotide sugar metabolism+ko00040//Pentose and glucuronate interconversions+ko01100//Metabolic pathways+ko00053//Ascorbate and aldarate metabolism;K00012//UDPglucose 6-dehydrogenase [EC:1.1.1.22]+ko00520//Amino sugar and nucleotide sugar metabolism+ko00040//Pentose and glucuronate interconversions+ko01100//Metabolic pathw…	UDP-glucose dehydrogenase [Ostreococcus tauri]	[GT] KOG2666 UDP-glucose/GDP-mannose dehydrogenase	UDP-glucose/GDP-mannose dehydrogenase family, NAD binding domain	UDP-glucose 6-dehydrogenase 1 OS=Oryza sativa subsp. japonica GN=UGD1 PE=3 SV=1			GO:0016616//oxidoreductase activity, acting on the CH-OH group of donors, NAD or NADP as acceptor;GO:0003979//UDP-glucose 6-dehydrogenase activity;GO:0000271//polysaccharide biosynthetic process;GO:0051287//NAD binding
Unigene73335_All	537	-6.0788	1.91305e-09	4.46521e-09				Bacteriophage HK97-gp10, putative tail-component
Unigene57672_All	1159	-6.0788	2.02439e-17	7.07533e-17	K03283//heat shock 70kDa protein 1/2/6/8+ko03040//Spliceosome+ko04144//Endocytosis+ko04141//Protein processing in endoplasmic reticulum;K22020//mucin-19;K03283//heat shock 70kDa protein 1/2/6/8+ko03040//Spliceosome+ko04144//Endocytosis+ko04141//Protein processing in endoplasmic reticulum	Rod shape determining protein (chromatophore) [Paulinella chromatophora] >ACB42894.1 Rod shape determining protein (chromatophore) [Paulinella chromatophora]	[O] KOG0101 Molecular chaperones HSP70/HSC70, HSP70 superfamily	MreB/Mbl protein	Chaperone protein dnaK OS=Diacronema lutheri GN=dnaK PE=3 SV=1			GO:0000902//cell morphogenesis;GO:0009536//plastid
Unigene32079_All	529	-6.0788	1.91305e-09	4.46521e-09		hypothetical protein BVRB_035530, partial [Beta vulgaris subsp. vulgaris]		Sigma-54 interaction domain				GO:0005524//ATP binding;GO:0006355//regulation of transcription, DNA-templated;GO:0043565//sequence-specific DNA binding;GO:0008134//transcription factor binding
Unigene40587_All	799	-6.0788	1.91305e-09	4.46521e-09	K02184//formin 2;K14325//RNA-binding protein with serine-rich domain 1+ko03015//mRNA surveillance pathway+ko03013//RNA transport;K14325//RNA-binding protein with serine-rich domain 1+ko03015//mRNA surveillance pathway+ko03013//RNA transport	conserved unknown protein [Ectocarpus siliculosus]	[AR] KOG2146 Splicing coactivator SRm160/300, subunit SRm160 (contains PWI domain)	Uracil DNA glycosylase superfamily	Protein IQ-DOMAIN 14 OS=Arabidopsis thaliana GN=IQD14 PE=1 SV=1			GO:0005509//calcium ion binding;GO:0009536//plastid
Unigene32620_All	800	-6.0788	1.91305e-09	4.46521e-09	K04718//sphingosine kinase [EC:2.7.1.91]+ko00600//Sphingolipid metabolism+ko01100//Metabolic pathways	PREDICTED: sphingoid long-chain bases kinase 2, mitochondrial-like [Gossypium hirsutum]	[IT] KOG1116 Sphingosine kinase, involved in sphingolipid metabolism	Diacylglycerol kinase catalytic domain	Sphingoid long-chain bases kinase 2, mitochondrial OS=Arabidopsis thaliana GN=LCKB2 PE=2 SV=1			GO:0003951//NAD+ kinase activity
Unigene64678_All	941	-6.0788	1.91305e-09	4.46521e-09	K00297//methylenetetrahydrofolate reductase (NADPH) [EC:1.5.1.20]+ko00670//One carbon pool by folate+ko01100//Metabolic pathways+ko01200//Carbon metabolism;K00297//methylenetetrahydrofolate reductase (NADPH) [EC:1.5.1.20]+ko00670//One carbon pool by folate+ko01100//Metabolic pathways+ko01200//Carbon metabolism;K00297//methylenetetrahydrofolate reductase (NADPH) [EC:1.5.1.20]+ko00670//One carbon p…	5,10-methylenetetrahydrofolate reductase [Ostreococcus tauri]	[E] KOG0564 5,10-methylenetetrahydrofolate reductase	Methylenetetrahydrofolate reductase	Methylenetetrahydrofolate reductase 1 OS=Arabidopsis thaliana GN=MTHFR1 PE=1 SV=1			GO:0005829//cytosol;GO:0004489//methylenetetrahydrofolate reductase (NAD(P)H) activity;GO:0035999//tetrahydrofolate interconversion;GO:0009086//methionine biosynthetic process
Unigene67578_All	1086	-6.0788	1.91305e-09	4.46521e-09	K07513//acetyl-CoA acyltransferase 1 [EC:2.3.1.16]+ko04146//Peroxisome+ko00280//Valine, leucine and isoleucine degradation+ko00592//alpha-Linolenic acid metabolism+ko01100//Metabolic pathways+ko01110//Biosynthesis of secondary metabolites+ko01212//Fatty acid metabolism+ko01040//Biosynthesis of unsaturated fatty acids+ko00071//Fatty acid degradation;K07513//acetyl-CoA acyltransferase 1 [EC:2.3.1.1…	hypothetical protein F511_08504 [Dorcoceras hygrometricum]	[I] KOG1391 Acetyl-CoA acetyltransferase	Thiolase, N-terminal domain	3-ketoacyl-CoA thiolase 5, peroxisomal OS=Arabidopsis thaliana GN=KAT5 PE=2 SV=2			GO:0008152//metabolic process;GO:0016747//transferase activity, transferring acyl groups other than amino-acyl groups
Unigene35682_All	919	-6.0788	1.91305e-09	4.46521e-09	K01462//peptide deformylase [EC:3.5.1.88];K01462//peptide deformylase [EC:3.5.1.88];K01462//peptide deformylase [EC:3.5.1.88];K01462//peptide deformylase [EC:3.5.1.88]	peptide deformylase [Micromonas pusilla CCMP1545] >EEH60577.1 peptide deformylase [Micromonas pusilla CCMP1545]	[J] KOG3137 Peptide deformylase	Polypeptide deformylase	Peptide deformylase 1A, chloroplastic/mitochondrial OS=Arabidopsis thaliana GN=PDF1A PE=1 SV=3			GO:0043686//co-translational protein modification;GO:0031365//N-terminal protein amino acid modification;GO:0009505//plant-type cell wall;GO:0046872//metal ion binding;GO:0042586//peptide deformylase activity;GO:0006412//translation;GO:0005739//mitochondrion;GO:0009507//chloroplast;GO:0009570//chloroplast stroma;GO:0018206//peptidyl-methionine modification
Unigene58924_All	1277	-6.0788	1.91305e-09	4.46521e-09	K13171//serine/arginine repetitive matrix protein 1+ko03015//mRNA surveillance pathway+ko03013//RNA transport;K22020//mucin-19;K13171//serine/arginine repetitive matrix protein 1+ko03015//mRNA surveillance pathway+ko03013//RNA transport	scarecrow-like transcription factor PAT1 [Herrania umbratica]	[AR] KOG2146 Splicing coactivator SRm160/300, subunit SRm160 (contains PWI domain)
Unigene67190_All	1135	-6.0788	2.02439e-17	7.07533e-17	K03100//signal peptidase I [EC:3.4.21.89]+ko03060//Protein export;K03100//signal peptidase I [EC:3.4.21.89]+ko03060//Protein export;K03100//signal peptidase I [EC:3.4.21.89]+ko03060//Protein export;K03100//signal peptidase I [EC:3.4.21.89]+ko03060//Protein export	signal peptidase I [Bathycoccus prasinos] >CCO17115.1 signal peptidase I [Bathycoccus prasinos]	[O] KOG0171 Mitochondrial inner membrane protease, subunit IMP1	Peptidase S24-like	Endoribonuclease Dicer homolog 3a OS=Oryza sativa subsp. japonica GN=DCL3A PE=2 SV=1			GO:0016021//integral component of membrane;GO:0008236//serine-type peptidase activity
Unigene6023_All	2569	-6.07749	1.94468e-09	4.53669e-09	K01180//endo-1,3(4)-beta-glucanase [EC:3.2.1.6];K20547//basic endochitinase B [EC:3.2.1.14]+ko04016//MAPK signaling pathway - plant+ko00520//Amino sugar and nucleotide sugar metabolism+ko01100//Metabolic pathways;K04733//interleukin-1 receptor-associated kinase 4 [EC:2.7.11.1];K04733//interleukin-1 receptor-associated kinase 4 [EC:2.7.11.1]	minus agglutinin [Chlamydomonas incerta]	[T] KOG1187 Serine/threonine protein kinase	Reverse transcriptase-like	Formin-like protein 16 OS=Oryza sativa subsp. japonica GN=FH16 PE=2 SV=1
CL1331.Contig2_All	967	-6.07661	1.96606e-09	4.58527e-09	K03046//DNA-directed RNA polymerase subunit beta' [EC:2.7.7.6]+ko03020//RNA polymerase;K03046//DNA-directed RNA polymerase subunit beta' [EC:2.7.7.6]+ko03020//RNA polymerase;K03046//DNA-directed RNA polymerase subunit beta' [EC:2.7.7.6]+ko03020//RNA polymerase;K03046//DNA-directed RNA polymerase subunit beta' [EC:2.7.7.6]+ko03020//RNA polymerase;K03046//DNA-directed RNA polymerase subunit beta' […	RNA polymerase beta-subbunit (chloroplast) [Galaxaura rugosa] >SCW21757.1 RNA polymerase beta-subbunit (chloroplast) [Galaxaura rugosa]	[K] KOG0261 RNA polymerase III, large subunit	RNA polymerase Rpb1, domain 2	DNA-directed RNA polymerase subunit beta' OS=Porphyra purpurea GN=rpoC1 PE=3 SV=1			GO:0003899//DNA-directed 5'-3' RNA polymerase activity;GO:0003677//DNA binding;GO:0006351//transcription, DNA-templated;GO:0009536//plastid;GO:0009507//chloroplast
CL6560.Contig2_All	1127	-6.07442	2.02055e-09	4.70816e-09	K00677//UDP-N-acetylglucosamine acyltransferase [EC:2.3.1.129]+ko01100//Metabolic pathways;K00677//UDP-N-acetylglucosamine acyltransferase [EC:2.3.1.129]+ko01100//Metabolic pathways;K00677//UDP-N-acetylglucosamine acyltransferase [EC:2.3.1.129]+ko01100//Metabolic pathways;K00677//UDP-N-acetylglucosamine acyltransferase [EC:2.3.1.129]+ko01100//Metabolic pathways;K00677//UDP-N-acetylglucosamine acy…	acyl-[acyl-carrier-protein]-UDP-N-acetylglucosamine O-acyltransferase [Aphanomyces invadans] >ETW05098.1 acyl-[acyl-carrier-protein]-UDP-N-acetylglucosamine O-acyltransferase [Aphanomyces invadans]	[I] LSE0254 A Hydroxyacyl-ACP dehydrase	FabA-like domain	Probable acyl-[acyl-carrier-protein]--UDP-N-acetylglucosamine O-acyltransferase, mitochondrial OS=Arabidopsis thaliana GN=LPXA PE=1 SV=1			GO:0008780//acyl-[acyl-carrier-protein]-UDP-N-acetylglucosamine O-acyltransferase activity;GO:0008610//lipid biosynthetic process
Unigene12166_All	1667	-6.07415	2.14001e-42	1.39709e-41	K12823//ATP-dependent RNA helicase DDX5/DBP2 [EC:3.6.4.13]+ko03040//Spliceosome;K12823//ATP-dependent RNA helicase DDX5/DBP2 [EC:3.6.4.13]+ko03040//Spliceosome;K12823//ATP-dependent RNA helicase DDX5/DBP2 [EC:3.6.4.13]+ko03040//Spliceosome;K12823//ATP-dependent RNA helicase DDX5/DBP2 [EC:3.6.4.13]+ko03040//Spliceosome;K12823//ATP-dependent RNA helicase DDX5/DBP2 [EC:3.6.4.13]+ko03040//Spliceosome	DEAD box helicase [Ectocarpus siliculosus]	[A] KOG0331 ATP-dependent RNA helicase	Helicase conserved C-terminal domain	DEAD-box ATP-dependent RNA helicase 30 OS=Arabidopsis thaliana GN=RH30 PE=1 SV=2		XM_001689970.1 Chlamydomonas reinhardtii DEAD-box RNA helicase (DBP2), partial mRNA	GO:0004004//ATP-dependent RNA helicase activity;GO:0005524//ATP binding;GO:0005730//nucleolus;GO:0010501//RNA secondary structure unwinding;GO:0004386//helicase activity;GO:0005737//cytoplasm;GO:0003676//nucleic acid binding
Unigene35902_All	564	-6.07332	1.81694e-64	1.60689e-63
CL5663.Contig2_All	891	-6.07267	2.06524e-09	4.80936e-09
CL1066.Contig6_All	2277	-6.06654	8.60147e-252	2.14478e-250
CL11123.Contig3_All	3199	-6.06617	3.21969e-94	3.75609e-93	K00434//L-ascorbate peroxidase [EC:1.11.1.11]+ko00053//Ascorbate and aldarate metabolism+ko00480//Glutathione metabolism;K00434//L-ascorbate peroxidase [EC:1.11.1.11]+ko00053//Ascorbate and aldarate metabolism+ko00480//Glutathione metabolism;K00434//L-ascorbate peroxidase [EC:1.11.1.11]+ko00053//Ascorbate and aldarate metabolism+ko00480//Glutathione metabolism;K00428//cytochrome c peroxidase [EC:…	hypothetical protein Naga_101468g1, partial [Nannochloropsis gaditana]	[R] TWOG0189 Peroxidase	Peroxidase	L-ascorbate peroxidase 3 OS=Arabidopsis thaliana GN=APX3 PE=1 SV=1
CL5866.Contig2_All	1885	-6.0638	1.64969e-69	1.54035e-68	K09250//cellular nucleic acid-binding protein	putative NIN-like transcription factor [Vaucheria litorea]	[R] LSE0422 A Homolog of regulator controlling development of symbiotic root nodules, contains Phox and Bem1p domain, and RWP-RK domain	RWP-RK domain	Protein NLP7 OS=Arabidopsis thaliana GN=NLP7 PE=1 SV=2
Unigene62054_All	1859	-6.05677	3.47507e-17	1.20473e-16	K01897//long-chain acyl-CoA synthetase [EC:6.2.1.3]+ko04146//Peroxisome+ko01100//Metabolic pathways+ko00061//Fatty acid biosynthesis+ko01212//Fatty acid metabolism+ko00071//Fatty acid degradation;K01897//long-chain acyl-CoA synthetase [EC:6.2.1.3]+ko04146//Peroxisome+ko01100//Metabolic pathways+ko00061//Fatty acid biosynthesis+ko01212//Fatty acid metabolism+ko00071//Fatty acid degradation;K01897/…	long-chain acyl-CoA synthetase [Galdieria sulphuraria] >EME32573.1 long-chain acyl-CoA synthetase [Galdieria sulphuraria]	[I] KOG1256 Long-chain acyl-CoA synthetases (AMP-forming)	AMP-binding enzyme	Long chain acyl-CoA synthetase 6, peroxisomal OS=Arabidopsis thaliana GN=LACS6 PE=1 SV=1			GO:0008152//metabolic process;GO:0004467//long-chain fatty acid-CoA ligase activity;GO:0102391//decanoate--CoA ligase activity;GO:0016874//ligase activity
Unigene2268_All	972	-6.05677	3.47507e-17	1.20473e-16							HG975520.1 Solanum lycopersicum chromosome ch08, complete genome
CL4754.Contig1_All	1248	-6.05453	1.36326e-272	3.62472e-271				HemY protein N-terminus
Unigene66073_All	2338	-6.04003	4.51667e-63	3.92401e-62	K01689//enolase [EC:4.2.1.11]+ko00010//Glycolysis / Gluconeogenesis+ko01230//Biosynthesis of amino acids+ko03018//RNA degradation+ko01100//Metabolic pathways+ko01110//Biosynthesis of secondary metabolites+ko01200//Carbon metabolism;K01689//enolase [EC:4.2.1.11]+ko00010//Glycolysis / Gluconeogenesis+ko01230//Biosynthesis of amino acids+ko03018//RNA degradation+ko01100//Metabolic pathways+ko01110//…	enolase (plastid) [Paulinella micropora]	[G] KOG2670 Enolase	Enolase, C-terminal TIM barrel domain	Enolase OS=Oryza sativa subsp. japonica GN=ENO1 PE=1 SV=2			GO:0000287//magnesium ion binding;GO:0004634//phosphopyruvate hydratase activity;GO:0006096//glycolytic process;GO:0000015//phosphopyruvate hydratase complex;GO:0009536//plastid
CL11436.Contig2_All	594	-6.04003	5.21589e-17	1.79584e-16
Unigene60680_All	656	-6.0344	3.30899e-09	7.59615e-09
Unigene59343_All	670	-6.0344	3.30899e-09	7.59615e-09
Unigene67957_All	774	-6.0344	3.30899e-09	7.59615e-09	K00059//3-oxoacyl-[acyl-carrier protein] reductase [EC:1.1.1.100]+ko01100//Metabolic pathways+ko00061//Fatty acid biosynthesis+ko01212//Fatty acid metabolism+ko00780//Biotin metabolism;K00059//3-oxoacyl-[acyl-carrier protein] reductase [EC:1.1.1.100]+ko01100//Metabolic pathways+ko00061//Fatty acid biosynthesis+ko01212//Fatty acid metabolism+ko00780//Biotin metabolism;K00059//3-oxoacyl-[acyl-carri…	hydroxyacyl dehydrogenase, putative [Ricinus communis]	[Q] KOG1199 Short-chain alcohol dehydrogenase/3-hydroxyacyl-CoA dehydrogenase	short chain dehydrogenase	3-oxoacyl-[acyl-carrier-protein] reductase, chloroplastic OS=Cuphea lanceolata GN=CLKR27 PE=2 SV=1			GO:0016491//oxidoreductase activity
Unigene63638_All	905	-6.0344	3.30899e-09	7.59615e-09	K22020//mucin-19	hypothetical protein AURANDRAFT_71743, partial [Aureococcus anophagefferens] >EGB07534.1 hypothetical protein AURANDRAFT_71743, partial [Aureococcus anophagefferens]		PEP-utilising enzyme, N-terminal
Unigene48170_All	692	-6.0344	3.30899e-09	7.59615e-09	K11717//cysteine desulfurase / selenocysteine lyase [EC:2.8.1.7 4.4.1.16]+ko00450//Selenocompound metabolism+ko01100//Metabolic pathways;K14325//RNA-binding protein with serine-rich domain 1+ko03015//mRNA surveillance pathway+ko03013//RNA transport;K13171//serine/arginine repetitive matrix protein 1+ko03015//mRNA surveillance pathway+ko03013//RNA transport	hypothetical protein ACHHYP_00577 [Achlya hypogyna]	[A] KOG1869 Splicing coactivator SRm160/300, subunit SRm300	Aminotransferase class-V				GO:0003824//catalytic activity
Unigene66175_All	884	-6.0344	3.30899e-09	7.59615e-09	K00384//thioredoxin reductase (NADPH) [EC:1.8.1.9]+ko00450//Selenocompound metabolism;K00384//thioredoxin reductase (NADPH) [EC:1.8.1.9]+ko00450//Selenocompound metabolism;K00384//thioredoxin reductase (NADPH) [EC:1.8.1.9]+ko00450//Selenocompound metabolism;K00384//thioredoxin reductase (NADPH) [EC:1.8.1.9]+ko00450//Selenocompound metabolism;K00384//thioredoxin reductase (NADPH) [EC:1.8.1.9]+ko00…	PREDICTED: thioredoxin reductase NTRB [Brachypodium distachyon] >KQK01001.1 hypothetical protein BRADI_3g53200 [Brachypodium distachyon]	[O] KOG0404 Thioredoxin reductase	Bacterial extracellular solute-binding proteins, family 3	Thioredoxin reductase NTRA OS=Oryza sativa subsp. japonica GN=Os06g0327300 PE=3 SV=2			GO:0019430//removal of superoxide radicals;GO:0005623//cell;GO:0005737//cytoplasm;GO:0045454//cell redox homeostasis;GO:0016491//oxidoreductase activity;GO:0004791//thioredoxin-disulfide reductase activity
Unigene60759_All	1048	-6.0344	3.30899e-09	7.59615e-09	K01626//3-deoxy-7-phosphoheptulonate synthase [EC:2.5.1.54]+ko01230//Biosynthesis of amino acids+ko01100//Metabolic pathways+ko01110//Biosynthesis of secondary metabolites+ko00400//Phenylalanine, tyrosine and tryptophan biosynthesis;K01626//3-deoxy-7-phosphoheptulonate synthase [EC:2.5.1.54]+ko01230//Biosynthesis of amino acids+ko01100//Metabolic pathways+ko01110//Biosynthesis of secondary metabo…	PREDICTED: phospho-2-dehydro-3-deoxyheptonate aldolase 2, chloroplastic [Cucumis sativus] >KGN48736.1 3-deoxy-D-arabino-heptulosonate-7-phosphate synthase [Cucumis sativus]		Class-II DAHP synthetase family	Phospho-2-dehydro-3-deoxyheptonate aldolase 2, chloroplastic OS=Arabidopsis thaliana GN=DHS2 PE=2 SV=2			GO:0009423//chorismate biosynthetic process;GO:0003849//3-deoxy-7-phosphoheptulonate synthase activity;GO:0009073//aromatic amino acid family biosynthetic process;GO:0009507//chloroplast
Unigene74019_All	1064	-6.0344	3.30899e-09	7.59615e-09		RecR protein (chromatophore) [Paulinella chromatophora] >ACB43212.1 RecR protein (chromatophore) [Paulinella chromatophora]		YbaB/EbfC DNA-binding family				GO:0003677//DNA binding;GO:0006281//DNA repair;GO:0009536//plastid;GO:0006310//DNA recombination
Unigene60144_All	1035	-6.0344	3.30899e-09	7.59615e-09		Fructose-bisphosphate aldolase [Triticum urartu]	[R] KOG0409 Predicted dehydrogenase	Fructose-bisphosphate aldolase class-II				GO:0005634//nucleus;GO:0004616//phosphogluconate dehydrogenase (decarboxylating) activity;GO:0005975//carbohydrate metabolic process;GO:0008270//zinc ion binding;GO:0016832//aldehyde-lyase activity;GO:0051287//NAD binding
Unigene60609_All	784	-6.0344	3.30899e-09	7.59615e-09	K01887//arginyl-tRNA synthetase [EC:6.1.1.19]+ko00970//Aminoacyl-tRNA biosynthesis;K01887//arginyl-tRNA synthetase [EC:6.1.1.19]+ko00970//Aminoacyl-tRNA biosynthesis;K01887//arginyl-tRNA synthetase [EC:6.1.1.19]+ko00970//Aminoacyl-tRNA biosynthesis;K01887//arginyl-tRNA synthetase [EC:6.1.1.19]+ko00970//Aminoacyl-tRNA biosynthesis;K01887//arginyl-tRNA synthetase [EC:6.1.1.19]+ko00970//Aminoacyl-tR…	putative arginine--tRNA ligase, cytoplasmic, partial [Dorcoceras hygrometricum]	[J] KOG1195 Arginyl-tRNA synthetase	DALR anticodon binding domain				GO:0004814//arginine-tRNA ligase activity;GO:0005524//ATP binding;GO:0006420//arginyl-tRNA aminoacylation;GO:0005737//cytoplasm
Unigene65104_All	1100	-6.0344	3.30899e-09	7.59615e-09	K04077//chaperonin GroEL+ko03018//RNA degradation;K04077//chaperonin GroEL+ko03018//RNA degradation;K04077//chaperonin GroEL+ko03018//RNA degradation;K04077//chaperonin GroEL+ko03018//RNA degradation	chaperonin GroEL (plastid) [Cryptomonas curvata] >ASO75713.1 chaperonin GroEL (plastid) [Cryptomonas curvata]	[O] KOG0356 Mitochondrial chaperonin, Cpn60/Hsp60p	TCP-1/cpn60 chaperonin family	60 kDa chaperonin, chloroplastic OS=Guillardia theta GN=groL PE=3 SV=1			GO:0005524//ATP binding;GO:0042026//protein refolding;GO:0005737//cytoplasm
Unigene43016_All	1464	-6.0344	4.38972e-78	4.47436e-77		EsV-1-7 [Ectocarpus siliculosus]
CL2499.Contig1_All	645	-6.0344	3.30899e-09	7.59615e-09
Unigene31606_All	1003	-6.0344	3.30899e-09	7.59615e-09
Unigene67554_All	983	-6.0344	5.97291e-17	2.05094e-16		hypothetical protein OsI_13390 [Oryza sativa Indica Group]		ATP-dependent Clp protease adaptor protein ClpS
Unigene3314_All	663	-6.0344	5.97291e-17	2.05094e-16	K00430//peroxidase [EC:1.11.1.7]+ko01100//Metabolic pathways+ko01110//Biosynthesis of secondary metabolites+ko00940//Phenylpropanoid biosynthesis;K13339//peroxin-6+ko04146//Peroxisome;K01102//pyruvate dehydrogenase phosphatase [EC:3.1.3.43];K17987//next to BRCA1 gene 1 protein	PREDICTED: glycine-rich cell wall structural protein-like [Ricinus communis]	[S] LSE0373 A Uncharacterized		Dirigent protein 10 OS=Arabidopsis thaliana GN=DIR10 PE=2 SV=1
Unigene16492_All	1158	-6.02309	4.62814e-32	2.45848e-31		hypothetical protein COLO4_01703, partial [Corchorus olitorius]		Bacterial dnaA protein				GO:0003688//DNA replication origin binding;GO:0005524//ATP binding;GO:0006275//regulation of DNA replication;GO:0006270//DNA replication initiation;GO:0009536//plastid
CL9373.Contig2_All	1130	-6.02309	4.62814e-32	2.45848e-31	K03639//GTP 3',8-cyclase [EC:4.1.99.22]+ko04122//Sulfur relay system+ko01100//Metabolic pathways+ko00790//Folate biosynthesis;K03639//GTP 3',8-cyclase [EC:4.1.99.22]+ko04122//Sulfur relay system+ko01100//Metabolic pathways+ko00790//Folate biosynthesis;K03639//GTP 3',8-cyclase [EC:4.1.99.22]+ko04122//Sulfur relay system+ko01100//Metabolic pathways+ko00790//Folate biosynthesis;K03639//GTP 3',8-cycl…	molybdenum cofactor biosynthesis protein 1 [Chrysochromulina sp. CCMP291]	[H] KOG2876 Molybdenum cofactor biosynthesis pathway protein	Molybdenum Cofactor Synthesis C	GTP 3',8-cyclase, mitochondrial OS=Arabidopsis thaliana GN=CNX2 PE=1 SV=1			GO:0006777//Mo-molybdopterin cofactor biosynthetic process;GO:0046872//metal ion binding;GO:0051539//4 iron, 4 sulfur cluster binding;GO:0003824//catalytic activity;GO:0005739//mitochondrion;GO:0019008//molybdopterin synthase complex
CL5211.Contig2_All	249	-6.02241	7.96306e-17	2.72078e-16
CL10081.Contig3_All	1206	-6.01534	4.16874e-09	9.51662e-09	K01358//ATP-dependent Clp protease, protease subunit [EC:3.4.21.92];K01358//ATP-dependent Clp protease, protease subunit [EC:3.4.21.92];K01358//ATP-dependent Clp protease, protease subunit [EC:3.4.21.92];K01358//ATP-dependent Clp protease, protease subunit [EC:3.4.21.92];K01358//ATP-dependent Clp protease, protease subunit [EC:3.4.21.92]	ATP-dependent Clp protease, protease subunit [Nannochloropsis gaditana CCMP526] >EKU20189.1 ATP-dependent Clp protease, protease subunit [Nannochloropsis gaditana CCMP526]	[O] KOG0840 ATP-dependent Clp protease, proteolytic subunit	Clp protease	ATP-dependent Clp protease proteolytic subunit 2, mitochondrial OS=Arabidopsis thaliana GN=CLPP2 PE=1 SV=1		NM_001147783.2 Zea mays ATP-dependent Clp protease proteolytic subunit (pco133717), mRNA	GO:0004252//serine-type endopeptidase activity
CL10073.Contig1_All	2818	-6.01364	0	0	K10990//RecQ-mediated genome instability protein 1;K10990//RecQ-mediated genome instability protein 1;K12875//apoptotic chromatin condensation inducer in the nucleus+ko03040//Spliceosome+ko03015//mRNA surveillance pathway+ko03013//RNA transport;K00430//peroxidase [EC:1.11.1.7]+ko01100//Metabolic pathways+ko01110//Biosynthesis of secondary metabolites+ko00940//Phenylpropanoid biosynthesis;K00430//…	hypothetical protein H257_16126 [Aphanomyces astaci] >ETV67768.1 hypothetical protein H257_16126 [Aphanomyces astaci]	[T] KOG4743 Cyclin-dependent kinase inhibitor	YMGG-like Gly-zipper	Non-classical arabinogalactan protein 31 OS=Arabidopsis thaliana GN=AGP31 PE=1 SV=1			GO:0004252//serine-type endopeptidase activity;GO:0006508//proteolysis;GO:0005576//extracellular region;GO:0016021//integral component of membrane
Unigene21430_All	346	-6.01168	1.02794e-16	3.49468e-16
Unigene68194_All	731	-6.01168	1.02794e-16	3.49468e-16	K14325//RNA-binding protein with serine-rich domain 1+ko03015//mRNA surveillance pathway+ko03013//RNA transport;K14325//RNA-binding protein with serine-rich domain 1+ko03015//mRNA surveillance pathway+ko03013//RNA transport;K14325//RNA-binding protein with serine-rich domain 1+ko03015//mRNA surveillance pathway+ko03013//RNA transport;K14325//RNA-binding protein with serine-rich domain 1+ko03015//…	PREDICTED: serine/arginine-rich splicing factor SR45 [Cucumis sativus] >KGN54928.1 hypothetical protein Csa_4G607050 [Cucumis sativus]		Phasin protein
Unigene32144_All	1072	-6.01168	1.02794e-16	3.49468e-16	K05747//Wiskott-Aldrich syndrome protein+ko04144//Endocytosis;K10799//tankyrase [EC:2.4.2.30];K03006//DNA-directed RNA polymerase II subunit RPB1 [EC:2.7.7.6]+ko03020//RNA polymerase	hypothetical protein AXX17_ATUG04880 [Arabidopsis thaliana]	[WV] KOG1216 von Willebrand factor and related coagulation proteins	DHHA2 domain	Splicing factor U2af large subunit A OS=Triticum aestivum GN=U2AF65A PE=2 SV=1			GO:0016462//pyrophosphatase activity;GO:0005737//cytoplasm
Unigene39672_All	971	-6.01168	1.02794e-16	3.49468e-16				Domain of unknown function (DUF1835)
Unigene29674_All	2205	-6.00114	0	0	K01637//isocitrate lyase [EC:4.1.3.1]+ko01100//Metabolic pathways+ko01110//Biosynthesis of secondary metabolites+ko01200//Carbon metabolism+ko00630//Glyoxylate and dicarboxylate metabolism;K01637//isocitrate lyase [EC:4.1.3.1]+ko01100//Metabolic pathways+ko01110//Biosynthesis of secondary metabolites+ko01200//Carbon metabolism+ko00630//Glyoxylate and dicarboxylate metabolism;K01637//isocitrate ly…	Isocitrate lyase (Isocitrase) (Isocitratase) (ICL) [Ectocarpus siliculosus]	[C] KOG1260 Isocitrate lyase	Isocitrate lyase family	Isocitrate lyase OS=Oryza sativa subsp. japonica GN=ICL PE=1 SV=1		XM_009846266.1 Aphanomyces astaci isocitrate lyase mRNA	GO:0019752//carboxylic acid metabolic process;GO:0004451//isocitrate lyase activity
CL9917.Contig2_All	2023	-5.99616	0	0		hypothetical protein BE221DRAFT_216044 [Ostreococcus tauri]		FG-GAP repeat
Unigene50392_All	964	-5.99325	5.43137e-09	1.22946e-08
CL9297.Contig1_All	1248	-5.99199	2.81184e-94	3.28184e-93				Cyclin, N-terminal domain
Unigene73376_All	414	-5.9886	5.73963e-09	1.29629e-08		polyunsaturated fatty acid synthase 3 [Schizochytrium sp. ATCC PTA-9695]		FabA-like domain
Unigene28280_All	376	-5.9886	5.73963e-09	1.29629e-08
CL3297.Contig2_All	711	-5.9886	5.73963e-09	1.29629e-08	K03521//electron transfer flavoprotein beta subunit;K03521//electron transfer flavoprotein beta subunit;K03521//electron transfer flavoprotein beta subunit;K03521//electron transfer flavoprotein beta subunit	electron transfer flavoprotein beta [Arabidopsis thaliana] >Q9LSW8.1 RecName: Full=Electron transfer flavoprotein subunit beta, mitochondrial; Short=Beta-ETF; Flags: Precursor >AAL38600.1 AT5g43430/MWF20_14 [Arabidopsis thaliana] >BAA97422.1 electron transfer flavoprotein beta-subunit-like [Arabidopsis thaliana] >AAK74015.1 AT5g43430/MWF20_14 [Arabidopsis thaliana] >AED94960.1 electron transfer f…	[C] KOG3180 Electron transfer flavoprotein, beta subunit	Electron transfer flavoprotein domain	Electron transfer flavoprotein subunit beta, mitochondrial OS=Arabidopsis thaliana GN=ETFB PE=1 SV=1			GO:0009055//electron transfer activity;GO:0005759//mitochondrial matrix;GO:0006552//leucine catabolic process;GO:0005829//cytosol;GO:0015996//chlorophyll catabolic process;GO:0005739//mitochondrion;GO:0055114//oxidation-reduction process
Unigene74234_All	632	-5.9886	5.73963e-09	1.29629e-08		hypothetical protein BU14_0645s0005 [Porphyra umbilicalis]		Putative modulator of DNA gyrase
Unigene58576_All	813	-5.9886	5.73963e-09	1.29629e-08		conserved hypothetical protein [Ricinus communis]		Domain of unknown function DUF59
Unigene65105_All	802	-5.9886	5.73963e-09	1.29629e-08	K04077//chaperonin GroEL+ko03018//RNA degradation;K04077//chaperonin GroEL+ko03018//RNA degradation;K04077//chaperonin GroEL+ko03018//RNA degradation;K04077//chaperonin GroEL+ko03018//RNA degradation;K04077//chaperonin GroEL+ko03018//RNA degradation	chaperonin GroEL [Dorcoceras hygrometricum]	[O] KOG0356 Mitochondrial chaperonin, Cpn60/Hsp60p	TCP-1/cpn60 chaperonin family	60 kDa chaperonin, cyanelle OS=Cyanophora paradoxa GN=groL-A PE=3 SV=1			GO:0005524//ATP binding;GO:0051082//unfolded protein binding;GO:0009536//plastid;GO:0042026//protein refolding
Unigene40456_All	693	-5.9886	5.73963e-09	1.29629e-08	K00074//3-hydroxybutyryl-CoA dehydrogenase [EC:1.1.1.157]+ko01100//Metabolic pathways+ko00650//Butanoate metabolism+ko00360//Phenylalanine metabolism;K00074//3-hydroxybutyryl-CoA dehydrogenase [EC:1.1.1.157]+ko01100//Metabolic pathways+ko00650//Butanoate metabolism+ko00360//Phenylalanine metabolism;K00074//3-hydroxybutyryl-CoA dehydrogenase [EC:1.1.1.157]+ko01100//Metabolic pathways+ko00650//Buta…	3-hydroxyacyl-CoA dehydrogenase [Fistulifera solaris]	[I] KOG2304 3-hydroxyacyl-CoA dehydrogenase	3-hydroxyacyl-CoA dehydrogenase, NAD binding domain	Glyoxysomal fatty acid beta-oxidation multifunctional protein MFP-a OS=Cucumis sativus PE=1 SV=1			GO:0070403//NAD+ binding;GO:0006631//fatty acid metabolic process;GO:0003857//3-hydroxyacyl-CoA dehydrogenase activity
Unigene24110_All	784	-5.9886	5.73963e-09	1.29629e-08				AefR-like transcriptional repressor, C-terminal region
Unigene76342_All	509	-5.9886	5.73963e-09	1.29629e-08
Unigene64063_All	993	-5.9886	5.73963e-09	1.29629e-08		Glycerol-3-phosphate-binding periplasmic protein precursor, putative, partial [Ricinus communis]		Bacterial extracellular solute-binding protein
Unigene66596_All	994	-5.9886	5.73963e-09	1.29629e-08	K00140//malonate-semialdehyde dehydrogenase (acetylating) / methylmalonate-semialdehyde dehydrogenase [EC:1.2.1.18 1.2.1.27]+ko00410//beta-Alanine metabolism+ko00280//Valine, leucine and isoleucine degradation+ko00640//Propanoate metabolism+ko01100//Metabolic pathways+ko01200//Carbon metabolism+ko00562//Inositol phosphate metabolism;K00140//malonate-semialdehyde dehydrogenase (acetylating) / meth…	hypothetical protein AXG93_4625s1120 [Marchantia polymorpha subsp. ruderalis]	[EG] KOG2449 Methylmalonate semialdehyde dehydrogenase	Aldehyde dehydrogenase family	Methylmalonate-semialdehyde dehydrogenase [acylating], mitochondrial OS=Arabidopsis thaliana GN=ALDH6B2 PE=1 SV=2			GO:0004491//methylmalonate-semialdehyde dehydrogenase (acylating) activity
Unigene65668_All	1115	-5.9886	5.73963e-09	1.29629e-08		conserved hypothetical protein [Ricinus communis]		Protein of unknown function, DUF
Unigene62271_All	1196	-5.9886	5.73963e-09	1.29629e-08		hypothetical protein FisN_2Hh003 [Fistulifera solaris]	[O] KOG4597 Serine proteinase inhibitor (KU family) with thrombospondin repeats	Haemolysin-type calcium-binding repeat (2 copies)
Unigene40399_All	894	-5.9886	5.73963e-09	1.29629e-08	K06185//ATP-binding cassette, subfamily F, member 2;K06158//ATP-binding cassette, subfamily F, member 3;K06158//ATP-binding cassette, subfamily F, member 3;K06158//ATP-binding cassette, subfamily F, member 3;K06158//ATP-binding cassette, subfamily F, member 3	hypothetical protein AURANDRAFT_28694 [Aureococcus anophagefferens] >EGB06701.1 hypothetical protein AURANDRAFT_28694 [Aureococcus anophagefferens]	[EJ] KOG0062 ATPase component of ABC transporters with duplicated ATPase domains/Translation elongation factor EF-3b	ABC transporter	ABC transporter F family member 5 OS=Arabidopsis thaliana GN=ABCF5 PE=2 SV=1			GO:0005524//ATP binding;GO:0016887//ATPase activity
Unigene2836_All	1096	-5.9886	1.77138e-16	5.96992e-16
Unigene36003_All	1137	-5.9886	5.73963e-09	1.29629e-08	K02931//large subunit ribosomal protein L5+ko03010//Ribosome;K02931//large subunit ribosomal protein L5+ko03010//Ribosome;K02931//large subunit ribosomal protein L5+ko03010//Ribosome;K02931//large subunit ribosomal protein L5+ko03010//Ribosome;K02931//large subunit ribosomal protein L5+ko03010//Ribosome	50S ribosomal protein L5, partial [Cajanus cajan]	[J] KOG0398 Mitochondrial/chloroplast ribosomal protein L5/L7	Ribosomal protein S8	50S ribosomal protein L5, cyanelle OS=Cyanophora paradoxa GN=rpl5 PE=3 SV=2
Unigene43432_All	810	-5.9886	1.77138e-16	5.96992e-16				RES domain
CL6945.Contig1_All	976	-5.97692	4.02025e-31	2.09703e-30	K00121//S-(hydroxymethyl)glutathione dehydrogenase / alcohol dehydrogenase [EC:1.1.1.284 1.1.1.1]+ko00010//Glycolysis / Gluconeogenesis+ko00350//Tyrosine metabolism+ko01100//Metabolic pathways+ko01110//Biosynthesis of secondary metabolites+ko00071//Fatty acid degradation+ko01200//Carbon metabolism;K00121//S-(hydroxymethyl)glutathione dehydrogenase / alcohol dehydrogenase [EC:1.1.1.284 1.1.1.1]+ko…	hypothetical protein F511_29957 [Dorcoceras hygrometricum]	[Q] KOG0022 Alcohol dehydrogenase, class III	Alcohol dehydrogenase GroES-like domain	Alcohol dehydrogenase class-3 OS=Oryza sativa subsp. indica GN=ADHIII PE=3 SV=1			GO:0006069//ethanol oxidation;GO:0008270//zinc ion binding;GO:0051903//S-(hydroxymethyl)glutathione dehydrogenase activity
Unigene50408_All	1473	-5.97457	6.77459e-09	1.52105e-08		lipid droplet surface protein [Nannochloropsis sp. CCMP1779]		Phosphoinositide-interacting protein family	Formin-like protein 5 OS=Oryza sativa subsp. japonica GN=FH5 PE=2 SV=2
CL10611.Contig1_All	4786	-5.97451	2.37531e-202	4.9832e-201	K03883//NADH-ubiquinone oxidoreductase chain 5 [EC:7.1.1.2]+ko01100//Metabolic pathways+ko00190//Oxidative phosphorylation;K05577//NAD(P)H-quinone oxidoreductase subunit 5 [EC:7.1.1.2]+ko01100//Metabolic pathways+ko00190//Oxidative phosphorylation;K05577//NAD(P)H-quinone oxidoreductase subunit 5 [EC:7.1.1.2]+ko01100//Metabolic pathways+ko00190//Oxidative phosphorylation;K03883//NADH-ubiquinone ox…	NADH dehydrogenase subunit 5 [Thalassiosira pseudonana] >AAZ99393.1 NADH dehydrogenase subunit 5 (mitochondrion) [Thalassiosira pseudonana]	[C] KOG4668 NADH dehydrogenase subunits 2, 5, and related proteins	Uncharacterized protein conserved in bacteria (DUF2309)	NAD(P)H-quinone oxidoreductase subunit 5, chloroplastic OS=Nymphaea alba GN=ndhF PE=3 SV=1			GO:0005743//mitochondrial inner membrane;GO:0016021//integral component of membrane;GO:0042773//ATP synthesis coupled electron transport;GO:0070469//respiratory chain;GO:0008137//NADH dehydrogenase (ubiquinone) activity
CL8456.Contig1_All	1497	-5.96738	3.40991e-71	3.23802e-70	K11865//protein MYSM1;K12133//MYB-related transcription factor LHY+ko04712//Circadian rhythm - plant;K12133//MYB-related transcription factor LHY+ko04712//Circadian rhythm - plant	hypothetical protein L916_19037 [Phytophthora parasitica]	[O] KOG0724 Zuotin and related molecular chaperones (DnaJ superfamily), contains DNA-binding domains	Myb-like DNA-binding domain	Transcription factor SRM1 OS=Arabidopsis thaliana GN=SRM1 PE=1 SV=1	MYB
Unigene75720_All	713	-5.96514	3.05655e-16	1.02023e-15				Uncharacterized protein conserved in archaea (DUF2099)
Unigene19529_All	995	-5.96514	1.79677e-45	1.23615e-44	K13171//serine/arginine repetitive matrix protein 1+ko03015//mRNA surveillance pathway+ko03013//RNA transport;K13171//serine/arginine repetitive matrix protein 1+ko03015//mRNA surveillance pathway+ko03013//RNA transport;K13171//serine/arginine repetitive matrix protein 1+ko03015//mRNA surveillance pathway+ko03013//RNA transport;K02184//formin 2	serine/arginine repetitive matrix protein 2 isoform X3 [Sorghum bicolor]	[R] KOG0382 Carbonic anhydrase		Alpha carbonic anhydrase 8 OS=Arabidopsis thaliana GN=ACA8 PE=3 SV=3		CP018157.1 Oryza sativa Indica Group cultivar Shuhui498 chromosome 1 sequence
Unigene60923_All	1292	-5.96514	3.05655e-16	1.02023e-15		hypothetical protein COLO4_00993 [Corchorus olitorius]		L,D-transpeptidase catalytic domain
Unigene20697_All	346	-5.96514	3.05655e-16	1.02023e-15
CL975.Contig2_All	1033	-5.9623	7.82301e-09	1.74965e-08	K13171//serine/arginine repetitive matrix protein 1+ko03015//mRNA surveillance pathway+ko03013//RNA transport	phenylacetic acid degradation protein, partial [Pfiesteria piscicida]	[A] KOG1869 Splicing coactivator SRm160/300, subunit SRm300	Phenylacetic acid catabolic protein
Unigene59390_All	1319	-5.95724	3.08703e-45	2.11826e-44	K05298//glyceraldehyde-3-phosphate dehydrogenase (NADP+) (phosphorylating) [EC:1.2.1.13]+ko01100//Metabolic pathways+ko00710//Carbon fixation in photosynthetic organisms+ko01200//Carbon metabolism;K05298//glyceraldehyde-3-phosphate dehydrogenase (NADP+) (phosphorylating) [EC:1.2.1.13]+ko01100//Metabolic pathways+ko00710//Carbon fixation in photosynthetic organisms+ko01200//Carbon metabolism;K0529…	plastid glyceraldehyde 3-phosphate dehydrogenase, partial [Trachelomonas ellipsoidalis]	[G] KOG0657 Glyceraldehyde 3-phosphate dehydrogenase	Glyceraldehyde 3-phosphate dehydrogenase, C-terminal domain	Glyceraldehyde-3-phosphate dehydrogenase B, chloroplastic (Fragment) OS=Nicotiana tabacum GN=GAPB PE=2 SV=1			GO:0006006//glucose metabolic process;GO:0016620//oxidoreductase activity, acting on the aldehyde or oxo group of donors, NAD or NADP as acceptor;GO:0050661//NADP binding;GO:0051287//NAD binding
Unigene19902_All	1511	-5.95088	7.1133e-74	6.93213e-73	K12133//MYB-related transcription factor LHY+ko04712//Circadian rhythm - plant;K12133//MYB-related transcription factor LHY+ko04712//Circadian rhythm - plant;K12133//MYB-related transcription factor LHY+ko04712//Circadian rhythm - plant	hypothetical protein ACHHYP_07251 [Achlya hypogyna]	[K] LSE0160 A Myb family transcription factor	Myb-like DNA-binding domain	Transcription factor MYBS1 OS=Oryza sativa subsp. japonica GN=MYBS1 PE=1 SV=1	MYB		GO:0003677//DNA binding;GO:0005634//nucleus;GO:0006355//regulation of transcription, DNA-templated;GO:0006351//transcription, DNA-templated
Unigene76637_All	1768	-5.94434	1.2842e-93	1.49081e-92	K19984//exocyst complex component 5;K02184//formin 2	hypothetical protein Ccrd_002805 [Cynara cardunculus var. scolymus]			Formin-like protein 5 OS=Oryza sativa subsp. japonica GN=FH5 PE=2 SV=2
Unigene25348_All	540	-5.9413	9.98444e-09	2.21266e-08
Unigene66325_All	543	-5.9413	9.98444e-09	2.21266e-08				Response regulator receiver domain
Unigene43509_All	767	-5.9413	5.28115e-16	1.74728e-15				Viral A-type inclusion protein repeat
Unigene70958_All	686	-5.9413	9.98444e-09	2.21266e-08		hypothetical protein BE221DRAFT_83832 [Ostreococcus tauri]		Protein of unknown function (DUF502)	Protein CONTINUOUS VASCULAR RING 1 OS=Arabidopsis thaliana GN=COV1 PE=1 SV=2			GO:0016021//integral component of membrane;GO:0009536//plastid
Unigene32161_All	584	-5.9413	9.98444e-09	2.21266e-08	K01897//long-chain acyl-CoA synthetase [EC:6.2.1.3]+ko04146//Peroxisome+ko01100//Metabolic pathways+ko00061//Fatty acid biosynthesis+ko01212//Fatty acid metabolism+ko00071//Fatty acid degradation;K01904//4-coumarate--CoA ligase [EC:6.2.1.12]+ko00130//Ubiquinone and other terpenoid-quinone biosynthesis+ko01100//Metabolic pathways+ko01110//Biosynthesis of secondary metabolites+ko00940//Phenylpropan…	hypothetical protein H257_06740 [Aphanomyces astaci] >ETV80469.1 hypothetical protein H257_06740 [Aphanomyces astaci]	[AR] KOG2146 Splicing coactivator SRm160/300, subunit SRm160 (contains PWI domain)	AMP-binding enzyme
Unigene67586_All	723	-5.9413	9.98444e-09	2.21266e-08	K10990//RecQ-mediated genome instability protein 1	classical arabinogalactan protein 9-like [Zea mays]		Methyltransferase domain
Unigene68845_All	763	-5.9413	9.98444e-09	2.21266e-08	K02864//large subunit ribosomal protein L10+ko03010//Ribosome;K02864//large subunit ribosomal protein L10+ko03010//Ribosome;K02864//large subunit ribosomal protein L10+ko03010//Ribosome;K02864//large subunit ribosomal protein L10+ko03010//Ribosome;K02864//large subunit ribosomal protein L10+ko03010//Ribosome	large subunit ribosomal protein L10 [Fistulifera solaris]		Ribosomal protein L10	50S ribosomal protein L10, chloroplastic OS=Spinacia oleracea GN=RPL10 PE=1 SV=2			GO:0005840//ribosome;GO:0042254//ribosome biogenesis;GO:0005622//intracellular;GO:0009536//plastid
Unigene63881_All	718	-5.9413	9.98444e-09	2.21266e-08		PREDICTED: invasion protein B homolog BruAb1_0366-like [Gossypium hirsutum]		Invasion associated locus B (IalB) protein
Unigene43465_All	731	-5.9413	9.98444e-09	2.21266e-08	K05641//ATP-binding cassette, subfamily A (ABC1), member 1+ko02010//ABC transporters;K05641//ATP-binding cassette, subfamily A (ABC1), member 1+ko02010//ABC transporters;K05643//ATP-binding cassette, subfamily A (ABC1), member 3+ko02010//ABC transporters;K05643//ATP-binding cassette, subfamily A (ABC1), member 3+ko02010//ABC transporters	Polysialic acid transport ATP-binding protein KpsT [Symbiodinium microadriaticum]	[IR] KOG0059 Lipid exporter ABCA1 and related proteins, ABC superfamily	ABC transporter	ABC transporter F family member 5 OS=Arabidopsis thaliana GN=ABCF5 PE=2 SV=1			GO:0005524//ATP binding;GO:0016021//integral component of membrane;GO:0005215//transporter activity;GO:0016887//ATPase activity
Unigene70842_All	778	-5.9413	9.98444e-09	2.21266e-08	K11093//U1 small nuclear ribonucleoprotein 70kDa+ko03040//Spliceosome	uncharacterized protein DDB_G0283697 isoform X1 [Prunus persica] >XP_020425726.1 uncharacterized protein DDB_G0283697 isoform X1 [Prunus persica] >ONH92069.1 hypothetical protein PRUPE_8G152300 [Prunus persica]	[A] KOG0334 RNA helicase	Tripartite tricarboxylate transporter TctA family	DEAD-box ATP-dependent RNA helicase 42 OS=Arabidopsis thaliana GN=RH42 PE=1 SV=2
Unigene32109_All	580	-5.9413	9.98444e-09	2.21266e-08		glyceraldehyde-3-phosphate dehydrogenase, type I [Aphanomyces astaci] >ETV88732.1 glyceraldehyde-3-phosphate dehydrogenase, type I [Aphanomyces astaci]		Glyceraldehyde 3-phosphate dehydrogenase, NAD binding domain				GO:0016620//oxidoreductase activity, acting on the aldehyde or oxo group of donors, NAD or NADP as acceptor
Unigene39593_All	506	-5.9413	9.98444e-09	2.21266e-08		secreted protein [Nannochloropsis gaditana]		Beta-propeller repeat
Unigene44443_All	765	-5.9413	9.98444e-09	2.21266e-08				Domain of unknown function (DUF3329)
Unigene72699_All	1067	-5.9413	9.98444e-09	2.21266e-08	K10527//enoyl-CoA hydratase/3-hydroxyacyl-CoA dehydrogenase [EC:4.2.1.17 1.1.1.35 1.1.1.211]+ko00592//alpha-Linolenic acid metabolism+ko01100//Metabolic pathways+ko01110//Biosynthesis of secondary metabolites+ko01212//Fatty acid metabolism+ko00071//Fatty acid degradation;K10527//enoyl-CoA hydratase/3-hydroxyacyl-CoA dehydrogenase [EC:4.2.1.17 1.1.1.35 1.1.1.211]+ko00592//alpha-Linolenic acid meta…	fatty acid oxidation complex alpha subunit, putative, partial [Ricinus communis]	[I] KOG1683 Hydroxyacyl-CoA dehydrogenase/enoyl-CoA hydratase	3-hydroxyacyl-CoA dehydrogenase, NAD binding domain	Peroxisomal fatty acid beta-oxidation multifunctional protein AIM1 OS=Arabidopsis thaliana GN=AIM1 PE=1 SV=1			GO:0006631//fatty acid metabolic process;GO:0003857//3-hydroxyacyl-CoA dehydrogenase activity
Unigene64094_All	1089	-5.9413	9.98444e-09	2.21266e-08	K01259//proline iminopeptidase [EC:3.4.11.5]+ko00330//Arginine and proline metabolism;K01259//proline iminopeptidase [EC:3.4.11.5]+ko00330//Arginine and proline metabolism	PREDICTED: glutathione-binding protein GsiB-like [Ziziphus jujuba]		Bacterial extracellular solute-binding proteins, family 5 Middle	Proline iminopeptidase OS=Arabidopsis thaliana GN=PIP PE=2 SV=3
Unigene68933_All	1021	-5.9413	9.98444e-09	2.21266e-08				Dodecin
Unigene74076_All	1180	-5.9413	9.98444e-09	2.21266e-08	K14026//SEL1 protein+ko04141//Protein processing in endoplasmic reticulum;K14325//RNA-binding protein with serine-rich domain 1+ko03015//mRNA surveillance pathway+ko03013//RNA transport;K14325//RNA-binding protein with serine-rich domain 1+ko03015//mRNA surveillance pathway+ko03013//RNA transport;K14026//SEL1 protein+ko04141//Protein processing in endoplasmic reticulum	sel1 domain protein repeat-containing protein [Chrysochromulina sp. CCMP291]	[MOT] KOG1550 Extracellular protein SEL-1 and related proteins	Sel1 repeat	ERAD-associated E3 ubiquitin-protein ligase component HRD3 OS=Oryza sativa subsp. japonica GN=HRD3 PE=2 SV=1
CL3382.Contig1_All	775	-5.9413	9.98444e-09	2.21266e-08				WG containing repeat
Unigene70157_All	1307	-5.9413	5.28115e-16	1.74728e-15		hypothetical protein AURANDRAFT_70670, partial [Aureococcus anophagefferens] >EGB11868.1 hypothetical protein AURANDRAFT_70670, partial [Aureococcus anophagefferens]		Pyridoxal phosphate biosynthetic protein PdxA
Unigene31487_All	2128	-5.92922	1.27303e-58	1.04431e-57	K13171//serine/arginine repetitive matrix protein 1+ko03015//mRNA surveillance pathway+ko03013//RNA transport;K13171//serine/arginine repetitive matrix protein 1+ko03015//mRNA surveillance pathway+ko03013//RNA transport;K13171//serine/arginine repetitive matrix protein 1+ko03015//mRNA surveillance pathway+ko03013//RNA transport;K13171//serine/arginine repetitive matrix protein 1+ko03015//mRNA sur…	Glycerol-3-phosphate-binding periplasmic protein precursor, putative, partial [Ricinus communis]	[WV] KOG1216 von Willebrand factor and related coagulation proteins	Bacterial extracellular solute-binding protein				GO:0006397//mRNA processing
Unigene65614_All	1268	-5.92922	3.52754e-30	1.80277e-29		PREDICTED: uncharacterized protein LOC109505391 [Elaeis guineensis]		Sigma-70 region 2				GO:0003677//DNA binding;GO:0016021//integral component of membrane;GO:0003700//DNA binding transcription factor activity;GO:0016987//sigma factor activity;GO:0005886//plasma membrane;GO:0006352//DNA-templated transcription, initiation
CL1985.Contig3_All	958	-5.919	1.28931e-08	2.835e-08	K02184//formin 2;K02184//formin 2	Bifunctional inhibitor/lipid-transfer protein/seed storage 2S albumin superfamily protein [Arabidopsis thaliana] >AEE84611.1 Bifunctional inhibitor/lipid-transfer protein/seed storage 2S albumin superfamily protein [Arabidopsis thaliana]	[Z] KOG2418 Microtubule-associated protein TAU	Procyclic acidic repetitive protein (PARP)	Pollen-specific leucine-rich repeat extensin-like protein 4 OS=Arabidopsis thaliana GN=PEX4 PE=2 SV=1
Unigene25038_All	1665	-5.91705	6.08095e-30	3.08992e-29		polyphosphate kinase 2-domain-containing protein [Ostreococcus tauri]		Polyphosphate kinase 2 (PPK2)				GO:0008976//polyphosphate kinase activity
Unigene16763_All	1146	-5.91705	9.13718e-16	2.99062e-15	K13171//serine/arginine repetitive matrix protein 1+ko03015//mRNA surveillance pathway+ko03013//RNA transport;K13171//serine/arginine repetitive matrix protein 1+ko03015//mRNA surveillance pathway+ko03013//RNA transport	splicing factor PWI domain-containing protein [Zea mays]		Hint domain
Unigene21594_All	925	-5.91705	9.13718e-16	2.99062e-15		conserved hypothetical protein, partial [Ricinus communis]		TonB-dependent Receptor Plug Domain
CL5690.Contig1_All	2861	-5.91092	6.48469e-58	5.28215e-57	K02045//sulfate transport system ATP-binding protein [EC:3.6.3.25]+ko00920//Sulfur metabolism+ko02010//ABC transporters;K02045//sulfate transport system ATP-binding protein [EC:3.6.3.25]+ko00920//Sulfur metabolism+ko02010//ABC transporters;K02045//sulfate transport system ATP-binding protein [EC:3.6.3.25]+ko00920//Sulfur metabolism+ko02010//ABC transporters;K02045//sulfate transport system ATP-bi…	hypothetical protein OsI_14862 [Oryza sativa Indica Group]	[Q] KOG0055 Multidrug/pheromone exporter, ABC superfamily	Periplasmic binding protein	Protein STAR1 OS=Oryza sativa subsp. japonica GN=STAR1 PE=1 SV=1			GO:0055085//transmembrane transport;GO:0005524//ATP binding;GO:0009536//plastid;GO:0043190//ATP-binding cassette (ABC) transporter complex;GO:0016887//ATPase activity
CL5108.Contig2_All	3136	-5.90644	8.46174e-281	2.32958e-279	K14306//nuclear pore complex protein Nup62+ko03013//RNA transport;K14306//nuclear pore complex protein Nup62+ko03013//RNA transport;K14306//nuclear pore complex protein Nup62+ko03013//RNA transport;K14306//nuclear pore complex protein Nup62+ko03013//RNA transport;K14306//nuclear pore complex protein Nup62+ko03013//RNA transport	hypothetical protein LR48_Vigan02g018600 [Vigna angularis]	[GO] KOG4157 beta-1,6-N-acetylglucosaminyltransferase, contains WSC domain	YHS domain	Protein Ycf2 (Fragment) OS=Oenothera villaricae GN=ycf2 PE=3 SV=1			GO:0005643//nuclear pore;GO:0017056//structural constituent of nuclear pore
Unigene57965_All	1201	-5.90232	3.00326e-297	8.59665e-296
CL9708.Contig1_All	548	-5.89933	1.61113e-08	3.52209e-08	K05692//actin beta/gamma 1+ko04145//Phagosome;K10355//actin, other eukaryote;K10355//actin, other eukaryote;K05692//actin beta/gamma 1+ko04145//Phagosome;K10355//actin, other eukaryote	actin, partial [Cosmarium botrytis]	[Z] KOG0676 Actin and related proteins	Actin	Actin OS=Mesostigma viride PE=3 SV=1			GO:0005524//ATP binding
CL1788.Contig9_All	2173	-5.89537	1.68466e-08	3.67684e-08	K03320//ammonium transporter, Amt family;K03320//ammonium transporter, Amt family;K03320//ammonium transporter, Amt family;K03320//ammonium transporter, Amt family	ammonium transporter [Bathycoccus prasinos] >CCO19599.1 ammonium transporter [Bathycoccus prasinos]	[P] KOG0682 Ammonia permease	Ammonium Transporter Family	Ammonium transporter 1 member 3 OS=Oryza sativa subsp. japonica GN=AMT1-3 PE=2 SV=1			GO:0008519//ammonium transmembrane transporter activity;GO:0016021//integral component of membrane
Unigene59130_All	325	-5.89239	1.74201e-08	3.7937e-08
Unigene24233_All	724	-5.89239	1.58303e-15	5.13801e-15				Protein of unknown function (DUF1465)
Unigene16552_All	897	-5.89239	1.81057e-29	9.09778e-29	K14325//RNA-binding protein with serine-rich domain 1+ko03015//mRNA surveillance pathway+ko03013//RNA transport;K14325//RNA-binding protein with serine-rich domain 1+ko03015//mRNA surveillance pathway+ko03013//RNA transport;K14325//RNA-binding protein with serine-rich domain 1+ko03015//mRNA surveillance pathway+ko03013//RNA transport	hypothetical protein AURANDRAFT_71291, partial [Aureococcus anophagefferens] >EGB09872.1 hypothetical protein AURANDRAFT_71291, partial [Aureococcus anophagefferens]	[A] KOG1869 Splicing coactivator SRm160/300, subunit SRm300	Protein of unknown function (DUF1285)
Unigene43894_All	759	-5.89239	1.58303e-15	5.13801e-15	K14306//nuclear pore complex protein Nup62+ko03013//RNA transport;K14306//nuclear pore complex protein Nup62+ko03013//RNA transport;K17987//next to BRCA1 gene 1 protein;K14306//nuclear pore complex protein Nup62+ko03013//RNA transport	PREDICTED: nuclear pore complex protein NUP62 [Tarenaya hassleriana]	[O] KOG2285 E3 ubiquitin ligase, Cullin 1 component	Pathogenicity locus
CL11008.Contig2_All	1407	-5.89239	1.81057e-29	9.09778e-29	K01961//acetyl-CoA carboxylase, biotin carboxylase subunit [EC:6.4.1.2 6.3.4.14]+ko00640//Propanoate metabolism+ko01100//Metabolic pathways+ko01110//Biosynthesis of secondary metabolites+ko00061//Fatty acid biosynthesis+ko01212//Fatty acid metabolism+ko00620//Pyruvate metabolism+ko01200//Carbon metabolism;K01961//acetyl-CoA carboxylase, biotin carboxylase subunit [EC:6.4.1.2 6.3.4.14]+ko00640//Pr…	acetyl-CoA carboxylase, biotin carboxylase subunit [Nannochloropsis gaditana CCMP526] >EKU20196.1 acetyl-CoA carboxylase, biotin carboxylase subunit [Nannochloropsis gaditana CCMP526]	[IE] KOG0238 3-Methylcrotonyl-CoA carboxylase, biotin-containing subunit/Propionyl-CoA carboxylase, alpha chain/Acetyl-CoA carboxylase, biotin carboxylase subunit	Carbamoyl-phosphate synthase L chain, ATP binding domain	Biotin carboxylase, chloroplastic OS=Arabidopsis thaliana GN=CAC2 PE=1 SV=1		XM_005856113.1 Nannochloropsis gaditana CCMP526 acetyl-CoA carboxylase, biotin carboxylase subunit (ACCC), partial mRNA	GO:0003989//acetyl-CoA carboxylase activity;GO:0046872//metal ion binding;GO:0004075//biotin carboxylase activity;GO:0005524//ATP binding;GO:0006633//fatty acid biosynthetic process;GO:0009941//chloroplast envelope;GO:0009570//chloroplast stroma
CL1412.Contig3_All	409	-5.89239	1.74201e-08	3.7937e-08	K02867//large subunit ribosomal protein L11+ko03010//Ribosome;K02867//large subunit ribosomal protein L11+ko03010//Ribosome;K02867//large subunit ribosomal protein L11+ko03010//Ribosome;K02867//large subunit ribosomal protein L11+ko03010//Ribosome;K02867//large subunit ribosomal protein L11+ko03010//Ribosome	PREDICTED: 50S ribosomal protein L11, chloroplastic [Capsicum annuum]	[J] KOG3257 Mitochondrial/chloroplast ribosomal protein L11	Ribosomal protein L11, N-terminal domain	50S ribosomal protein L11, chloroplastic OS=Spinacia oleracea GN=rpl11 PE=1 SV=1			GO:0005840//ribosome;GO:0006412//translation;GO:0000027//ribosomal large subunit assembly;GO:0022625//cytosolic large ribosomal subunit;GO:0003735//structural constituent of ribosome;GO:0019843//rRNA binding
Unigene3695_All	384	-5.89239	1.74201e-08	3.7937e-08	K01259//proline iminopeptidase [EC:3.4.11.5]+ko00330//Arginine and proline metabolism;K01259//proline iminopeptidase [EC:3.4.11.5]+ko00330//Arginine and proline metabolism;K01259//proline iminopeptidase [EC:3.4.11.5]+ko00330//Arginine and proline metabolism;K01259//proline iminopeptidase [EC:3.4.11.5]+ko00330//Arginine and proline metabolism	proline iminopeptidase [Thraustotheca clavata]		alpha/beta hydrolase fold	Proline iminopeptidase OS=Arabidopsis thaliana GN=PIP PE=2 SV=3			GO:0004177//aminopeptidase activity;GO:0005737//cytoplasm
Unigene40643_All	839	-5.89239	1.58303e-15	5.13801e-15				Outer membrane protein beta-barrel domain
Unigene40180_All	732	-5.89239	1.58303e-15	5.13801e-15				Photosystem I protein M (PsaM)
Unigene36702_All	395	-5.89239	1.74201e-08	3.7937e-08	K06041//arabinose-5-phosphate isomerase [EC:5.3.1.13]+ko01100//Metabolic pathways	PREDICTED: CBS domain-containing protein CBSX3, mitochondrial [Gossypium raimondii] >XP_012464429.1 PREDICTED: CBS domain-containing protein CBSX3, mitochondrial [Gossypium raimondii] >XP_012464430.1 PREDICTED: CBS domain-containing protein CBSX3, mitochondrial [Gossypium raimondii] >KJB83955.1 hypothetical protein B456_013G145100 [Gossypium raimondii] >KJB83956.1 hypothetical protein B456_013G14…		CBS domain	CBS domain-containing protein CBSCBSPB2 OS=Arabidopsis thaliana GN=CBSCBSPB2 PE=2 SV=1
Unigene69294_All	711	-5.89239	1.74201e-08	3.7937e-08				Methyltransferase domain
Unigene29057_All	564	-5.89239	1.74201e-08	3.7937e-08				Phasin protein
Unigene66836_All	684	-5.89239	1.74201e-08	3.7937e-08				Penicillin-binding protein 5, C-terminal domain
CL3010.Contig1_All	2440	-5.89239	1.81057e-29	9.09778e-29	K02836//peptide chain release factor 2;K02836//peptide chain release factor 2;K02836//peptide chain release factor 2;K02836//peptide chain release factor 2;K02836//peptide chain release factor 2	hypothetical protein AXG93_1175s1190 [Marchantia polymorpha subsp. ruderalis]	[J] KOG2726 Mitochondrial polypeptide chain release factor	PCRF domain	Peptide chain release factor PrfB2, chloroplastic OS=Arabidopsis thaliana GN=PRFB2 PE=3 SV=1			GO:0016149//translation release factor activity, codon specific;GO:0005737//cytoplasm
Unigene24992_All	394	-5.89239	1.74201e-08	3.7937e-08				Bacterial regulatory proteins, gntR family
CL9352.Contig2_All	709	-5.89239	1.74201e-08	3.7937e-08		PREDICTED: phoH-like protein [Gossypium hirsutum]		PhoH-like protein			XM_016877465.1 PREDICTED: Gossypium hirsutum phoH-like protein (LOC107943679), mRNA	GO:0005524//ATP binding;GO:0009536//plastid
Unigene69023_All	650	-5.89239	1.74201e-08	3.7937e-08				Putative Actinobacterial Holin-X, holin superfamily III
Unigene27924_All	660	-5.89239	1.74201e-08	3.7937e-08				Carboxypeptidase regulatory-like domain
Unigene31957_All	500	-5.89239	1.74201e-08	3.7937e-08				Protein of unknown function (DUF4050)
Unigene68838_All	685	-5.89239	1.74201e-08	3.7937e-08	K22020//mucin-19	uncharacterized protein LOC110926720, partial [Helianthus annuus]		DSBA-like thioredoxin domain
Unigene64069_All	951	-5.89239	1.74201e-08	3.7937e-08	K07277//outer membrane protein insertion porin family;K07277//outer membrane protein insertion porin family;K07277//outer membrane protein insertion porin family	surface antigen-domain-containing protein [Ostreococcus tauri]	[R] KOG2602 Predicted cell surface protein homologous to bacterial outer membrane proteins	Surface antigen				GO:0019867//outer membrane
Unigene32002_All	742	-5.89239	1.74201e-08	3.7937e-08		conserved hypothetical protein [Ricinus communis]		Peptidase family S51				GO:0008236//serine-type peptidase activity
Unigene64736_All	1005	-5.89239	1.74201e-08	3.7937e-08	K10956//protein transport protein SEC61 subunit alpha+ko04145//Phagosome+ko04141//Protein processing in endoplasmic reticulum+ko03060//Protein export	PREDICTED: cell wall protein DAN4-like [Solanum tuberosum]		Sulfotransferase family
Unigene66086_All	909	-5.89239	1.74201e-08	3.7937e-08				PAS fold
Unigene72483_All	964	-5.89239	1.74201e-08	3.7937e-08	K00030//isocitrate dehydrogenase (NAD+) [EC:1.1.1.41]+ko00020//Citrate cycle (TCA cycle)+ko01230//Biosynthesis of amino acids+ko01100//Metabolic pathways+ko01110//Biosynthesis of secondary metabolites+ko01210//2-Oxocarboxylic acid metabolism+ko01200//Carbon metabolism;K00030//isocitrate dehydrogenase (NAD+) [EC:1.1.1.41]+ko00020//Citrate cycle (TCA cycle)+ko01230//Biosynthesis of amino acids+ko01…	hypothetical protein PAHAL_E03340 [Panicum hallii]	[E] KOG0785 Isocitrate dehydrogenase, alpha subunit	Isocitrate/isopropylmalate dehydrogenase	Isocitrate dehydrogenase [NAD] catalytic subunit 5, mitochondrial OS=Arabidopsis thaliana GN=IDH5 PE=1 SV=1			GO:0006099//tricarboxylic acid cycle;GO:0000287//magnesium ion binding;GO:0004449//isocitrate dehydrogenase (NAD+) activity;GO:0051287//NAD binding;GO:0005739//mitochondrion
Unigene43366_All	855	-5.89239	1.74201e-08	3.7937e-08
Unigene58787_All	1007	-5.89239	1.74201e-08	3.7937e-08	K14325//RNA-binding protein with serine-rich domain 1+ko03015//mRNA surveillance pathway+ko03013//RNA transport	hypothetical protein AURANDRAFT_71909 [Aureococcus anophagefferens] >EGB07034.1 hypothetical protein AURANDRAFT_71909 [Aureococcus anophagefferens]		Prokaryotic cytochrome b561
Unigene36630_All	847	-5.89239	1.74201e-08	3.7937e-08	K09458//3-oxoacyl-[acyl-carrier-protein] synthase II [EC:2.3.1.179]+ko01100//Metabolic pathways+ko00061//Fatty acid biosynthesis+ko01212//Fatty acid metabolism+ko00780//Biotin metabolism;K09458//3-oxoacyl-[acyl-carrier-protein] synthase II [EC:2.3.1.179]+ko01100//Metabolic pathways+ko00061//Fatty acid biosynthesis+ko01212//Fatty acid metabolism+ko00780//Biotin metabolism;K09458//3-oxoacyl-[acyl-c…	predicted protein [Ostreococcus lucimarinus CCE9901] >ABO94762.1 predicted protein [Ostreococcus lucimarinus CCE9901]	[IQ] KOG1394 3-oxoacyl-(acyl-carrier-protein) synthase (I and II)	Beta-ketoacyl synthase, N-terminal domain	3-oxoacyl-[acyl-carrier-protein] synthase I, chloroplastic OS=Arabidopsis thaliana GN=KAS1 PE=1 SV=2			GO:0016020//membrane;GO:0009735//response to cytokinin;GO:0006633//fatty acid biosynthetic process;GO:0016747//transferase activity, transferring acyl groups other than amino-acyl groups;GO:0009941//chloroplast envelope;GO:0010020//chloroplast fission;GO:0009570//chloroplast stroma
Unigene45274_All	1202	-5.89239	1.58303e-15	5.13801e-15				Na(+)-translocating NADH-quinone reductase subunit A (NQRA)
Unigene28283_All	333	-5.89239	1.58303e-15	5.13801e-15
CL4510.Contig2_All	1208	-5.8884	1.82157e-08	3.96089e-08	K00794//6,7-dimethyl-8-ribityllumazine synthase [EC:2.5.1.78]+ko00740//Riboflavin metabolism+ko01100//Metabolic pathways+ko01110//Biosynthesis of secondary metabolites;K00794//6,7-dimethyl-8-ribityllumazine synthase [EC:2.5.1.78]+ko00740//Riboflavin metabolism+ko01100//Metabolic pathways+ko01110//Biosynthesis of secondary metabolites;K00794//6,7-dimethyl-8-ribityllumazine synthase [EC:2.5.1.78]+k…	6,7-dimethyl-8-ribityllumazine synthase [Ostreococcus tauri]	[H] KOG3243 6,7-dimethyl-8-ribityllumazine synthase	6,7-dimethyl-8-ribityllumazine synthase	6,7-dimethyl-8-ribityllumazine synthase, chloroplastic OS=Arabidopsis thaliana GN=At2g44050 PE=2 SV=1
CL5364.Contig1_All	807	-5.8884	1.82157e-08	3.96089e-08				Double zinc ribbon
CL2494.Contig7_All	1967	-5.88832	7.75966e-29	3.8401e-28		conserved unknown protein [Ectocarpus siliculosus]		START domain				GO:0008289//lipid binding;GO:0015485//cholesterol binding
CL5108.Contig5_All	4118	-5.88798	4.96794e-303	1.45556e-301	K14306//nuclear pore complex protein Nup62+ko03013//RNA transport;K14306//nuclear pore complex protein Nup62+ko03013//RNA transport;K14306//nuclear pore complex protein Nup62+ko03013//RNA transport;K14306//nuclear pore complex protein Nup62+ko03013//RNA transport	PREDICTED: platelet binding protein GspB-like [Capsicum annuum]	[GO] KOG4157 beta-1,6-N-acetylglucosaminyltransferase, contains WSC domain	YHS domain	Nuclear pore complex protein NUP62 OS=Arabidopsis thaliana GN=NUP62 PE=1 SV=1
Unigene24162_All	768	-5.87989	9.8411e-57	7.89584e-56
CL11296.Contig2_All	2093	-5.87477	1.09913e-75	1.09015e-74		predicted protein [Thalassiosira pseudonana CCMP1335] >EED93289.1 predicted protein [Thalassiosira pseudonana CCMP1335]	[S] KOG2592 Tumor differentially expressed (TDE) protein	Serine incorporator (Serinc)				GO:0016021//integral component of membrane;GO:0015194//L-serine transmembrane transporter activity
CL9896.Contig1_All	661	-5.87285	2.16612e-08	4.68305e-08	K03880//NADH-ubiquinone oxidoreductase chain 3 [EC:7.1.1.2]+ko01100//Metabolic pathways+ko00190//Oxidative phosphorylation;K03880//NADH-ubiquinone oxidoreductase chain 3 [EC:7.1.1.2]+ko01100//Metabolic pathways+ko00190//Oxidative phosphorylation;K03880//NADH-ubiquinone oxidoreductase chain 3 [EC:7.1.1.2]+ko01100//Metabolic pathways+ko00190//Oxidative phosphorylation;K03880//NADH-ubiquinone oxidor…	RecName: Full=NADH-ubiquinone oxidoreductase chain 3; AltName: Full=NADH dehydrogenase subunit 3 >CAA87750.1 NADH dehydrogenase subunit 3 (mitochondrion) [Tetraselmis subcordiformis]	[C] KOG4662 NADH dehydrogenase subunit 3 and related proteins	NADH-ubiquinone/plastoquinone oxidoreductase, chain 3	NADH-ubiquinone oxidoreductase chain 3 OS=Tetraselmis subcordiformis GN=ND3 PE=3 SV=1		XM_017574328.1 PREDICTED: Vigna angularis NADH-quinone oxidoreductase subunit B 1-like (LOC108337746), mRNA	GO:0016021//integral component of membrane;GO:0005739//mitochondrion;GO:0008137//NADH dehydrogenase (ubiquinone) activity
CL1172.Contig1_All	527	-5.86729	2.74643e-15	8.81392e-15	K02871//large subunit ribosomal protein L13+ko03010//Ribosome;K02871//large subunit ribosomal protein L13+ko03010//Ribosome;K02871//large subunit ribosomal protein L13+ko03010//Ribosome;K02871//large subunit ribosomal protein L13+ko03010//Ribosome;K02871//large subunit ribosomal protein L13+ko03010//Ribosome	PREDICTED: 50S ribosomal protein L13, chloroplastic-like [Populus euphratica]	[J] KOG3203 Mitochondrial/chloroplast ribosomal protein L13	Ribosomal protein L13	50S ribosomal protein L13, chloroplastic OS=Spinacia oleracea GN=RPL13 PE=1 SV=1			GO:0005840//ribosome;GO:0003729//mRNA binding;GO:0006412//translation;GO:0003735//structural constituent of ribosome
Unigene60801_All	1340	-5.86729	2.74643e-15	8.81392e-15	K00873//pyruvate kinase [EC:2.7.1.40]+ko00010//Glycolysis / Gluconeogenesis+ko00230//Purine metabolism+ko01230//Biosynthesis of amino acids+ko01100//Metabolic pathways+ko01110//Biosynthesis of secondary metabolites+ko00620//Pyruvate metabolism+ko01200//Carbon metabolism;K00873//pyruvate kinase [EC:2.7.1.40]+ko00010//Glycolysis / Gluconeogenesis+ko00230//Purine metabolism+ko01230//Biosynthesis of …	pyruvate kinase [Dictyopteris undulata]	[G] KOG2323 Pyruvate kinase	Pyruvate kinase, barrel domain	Pyruvate kinase, cytosolic isozyme OS=Nicotiana tabacum PE=2 SV=1			GO:0030955//potassium ion binding;GO:0000287//magnesium ion binding;GO:0004743//pyruvate kinase activity;GO:0016301//kinase activity
CL9358.Contig2_All	1476	-5.86729	2.74643e-15	8.81392e-15	K03531//cell division protein FtsZ;K03531//cell division protein FtsZ;K03531//cell division protein FtsZ;K03531//cell division protein FtsZ;K03531//cell division protein FtsZ	mitochondrial division protein FtsZ1-1 [Cyanidioschyzon merolae strain 10D] >BAA85115.1 organelle division protein FtsZ [Cyanidioschyzon merolae] >BAC87805.1 mitochondrial division protein cmFtsZ1-1 [Cyanidioschyzon merolae] >BAM82940.1 mitochondrial division protein FtsZ1-1 [Cyanidioschyzon merolae strain 10D]	[A] KOG1869 Splicing coactivator SRm160/300, subunit SRm300	FtsZ family, C-terminal domain	Cell division protein FtsZ homolog 2-2, chloroplastic OS=Arabidopsis thaliana GN=FTSZ2-2 PE=1 SV=1			GO:0005525//GTP binding;GO:0005737//cytoplasm;GO:0003924//GTPase activity
CL10737.Contig1_All	1556	-5.86729	2.74643e-15	8.81392e-15	K02256//cytochrome c oxidase subunit 1 [EC:1.9.3.1]+ko01100//Metabolic pathways+ko00190//Oxidative phosphorylation;K02256//cytochrome c oxidase subunit 1 [EC:1.9.3.1]+ko01100//Metabolic pathways+ko00190//Oxidative phosphorylation;K02256//cytochrome c oxidase subunit 1 [EC:1.9.3.1]+ko01100//Metabolic pathways+ko00190//Oxidative phosphorylation;K02256//cytochrome c oxidase subunit 1 [EC:1.9.3.1]+ko…	cytochrome c oxidase subunit 1, partial (mitochondrion) (mitochondrion) [Botryococcus braunii Showa]	[C] KOG4769 Cytochrome c oxidase, subunit I	Cytochrome C and Quinol oxidase polypeptide I	Cytochrome c oxidase subunit 1 OS=Arabidopsis thaliana GN=COX1 PE=3 SV=1		KJ671753.1 Thalassiosira sp. 24 LG-2014 cytochrome oxidase subunit 1 gene, partial cds; mitochondrial	GO:0020037//heme binding;GO:0005506//iron ion binding;GO:0004129//cytochrome-c oxidase activity;GO:0045277//respiratory chain complex IV;GO:0009060//aerobic respiration;GO:0006119//oxidative phosphorylation;GO:0022900//electron transport chain;GO:0005507//copper ion binding;GO:0016021//integral component of membrane;GO:0005743//mitochondrial inner membrane;GO:0005886//plasma membrane
Unigene36837_All	1059	-5.86729	2.74643e-15	8.81392e-15	K14491//two-component response regulator ARR-B family+ko04075//Plant hormone signal transduction;K14491//two-component response regulator ARR-B family+ko04075//Plant hormone signal transduction;K14491//two-component response regulator ARR-B family+ko04075//Plant hormone signal transduction;K14491//two-component response regulator ARR-B family+ko04075//Plant hormone signal transduction;K14491//two…	hypothetical protein AXX17_ATUG04150 [Arabidopsis thaliana]	[K] KOG1601 GATA-4/5/6 transcription factors	Response regulator receiver domain	Probable transcriptional regulator ycf27 OS=Porphyra purpurea GN=ycf27 PE=3 SV=1			GO:0003677//DNA binding;GO:0005634//nucleus;GO:0000160//phosphorelay signal transduction system;GO:0006351//transcription, DNA-templated;GO:0003700//DNA binding transcription factor activity
CL4590.Contig3_All	1193	-5.86476	2.369e-08	5.10767e-08
CL1795.Contig1_All	1354	-5.8575	7.48829e-133	1.11641e-131
CL4905.Contig3_All	1249	-5.85566	2.5227e-69	2.35196e-68				Myb-like DNA-binding domain		MYB
Unigene2709_All	599	-5.85458	9.34793e-29	4.61783e-28
Unigene24335_All	1248	-5.8491	7.12323e-96	8.40862e-95	K13171//serine/arginine repetitive matrix protein 1+ko03015//mRNA surveillance pathway+ko03013//RNA transport;K13171//serine/arginine repetitive matrix protein 1+ko03015//mRNA surveillance pathway+ko03013//RNA transport;K22020//mucin-19;K02184//formin 2;K13115//coiled-coil domain-containing protein 130	hypothetical protein THAOC_16653 [Thalassiosira oceanica]	[ZR] LSE0118 A Protein possibly involved in cytoskeleton rearrangements, contains FH domain	SPRY domain	Formin-like protein 20 OS=Arabidopsis thaliana GN=FH20 PE=2 SV=3		XM_014042948.1 Monoraphidium neglectum hypothetical protein mRNA
CL6038.Contig1_All	1426	-5.8433	2.99774e-08	6.41321e-08
Unigene59348_All	533	-5.84176	4.77152e-15	1.51593e-14				MarR family
Unigene75732_All	905	-5.84176	4.77152e-15	1.51593e-14	K07511//enoyl-CoA hydratase [EC:4.2.1.17]+ko00410//beta-Alanine metabolism+ko00310//Lysine degradation+ko00380//Tryptophan metabolism+ko00280//Valine, leucine and isoleucine degradation+ko00640//Propanoate metabolism+ko01100//Metabolic pathways+ko00650//Butanoate metabolism+ko01110//Biosynthesis of secondary metabolites+ko00062//Fatty acid elongation+ko01212//Fatty acid metabolism+ko00071//Fatty …	hydratase enyol-coa hydratase [Phaeodactylum tricornutum CCAP 1055/1] >EEC43232.1 hydratase enyol-coa hydratase [Phaeodactylum tricornutum CCAP 1055/1]	[I] KOG1680 Enoyl-CoA hydratase	Enoyl-CoA hydratase/isomerase	Glyoxysomal fatty acid beta-oxidation multifunctional protein MFP-a OS=Cucumis sativus PE=1 SV=1			GO:0006635//fatty acid beta-oxidation;GO:0008152//metabolic process;GO:0005739//mitochondrion;GO:0004300//enoyl-CoA hydratase activity
Unigene74864_All	989	-5.84176	4.77152e-15	1.51593e-14	K22020//mucin-19;K13171//serine/arginine repetitive matrix protein 1+ko03015//mRNA surveillance pathway+ko03013//RNA transport;K00430//peroxidase [EC:1.11.1.7]+ko01100//Metabolic pathways+ko01110//Biosynthesis of secondary metabolites+ko00940//Phenylpropanoid biosynthesis	stomatin [Thraustotheca clavata]	[C] KOG2620 Prohibitins and stomatins of the PID superfamily	SPFH domain / Band 7 family	Hypersensitive-induced response protein 3 OS=Arabidopsis thaliana GN=HIR3 PE=1 SV=1			GO:0016020//membrane
Unigene69836_All	588	-5.84176	3.04863e-08	6.50864e-08	K18162//NADH dehydrogenase [ubiquinone] 1 alpha subcomplex assembly factor 5 [EC:2.1.1.-]	putative methyltransferase At1g22800 [Herrania umbratica]	[R] KOG2940 Predicted methyltransferase	Methyltransferase domain	Putative methyltransferase At1g22800, mitochondrial OS=Arabidopsis thaliana GN=At1g22800 PE=1 SV=2
Unigene65440_All	580	-5.84176	3.04863e-08	6.50864e-08	K00639//glycine C-acetyltransferase [EC:2.3.1.29]+ko00260//Glycine, serine and threonine metabolism;K00639//glycine C-acetyltransferase [EC:2.3.1.29]+ko00260//Glycine, serine and threonine metabolism;K00639//glycine C-acetyltransferase [EC:2.3.1.29]+ko00260//Glycine, serine and threonine metabolism;K00639//glycine C-acetyltransferase [EC:2.3.1.29]+ko00260//Glycine, serine and threonine metabolism…	2-amino-3-ketobutyrate coenzyme A ligase [Klebsormidium nitens]	[E] KOG1359 Glycine C-acetyltransferase/2-amino-3-ketobutyrate-CoA ligase	Aminotransferase class I and II	8-amino-7-oxononanoate synthase OS=Arabidopsis thaliana GN=BIOF PE=1 SV=2			GO:0009058//biosynthetic process;GO:0006567//threonine catabolic process;GO:0030170//pyridoxal phosphate binding;GO:0008890//glycine C-acetyltransferase activity;GO:0016874//ligase activity
Unigene62431_All	605	-5.84176	3.04863e-08	6.50864e-08	K06889//uncharacterized protein;K06889//uncharacterized protein;K06889//uncharacterized protein;K06889//uncharacterized protein	mycophenolic acid acyl-glucuronide esterase, mitochondrial-like [Chenopodium quinoa]	[I] KOG4667 Predicted esterase	Serine aminopeptidase, S33
Unigene60366_All	610	-5.84176	3.04863e-08	6.50864e-08		uncharacterized protein LOC110428888 [Herrania umbratica]		Dehydroquinase class II
Unigene61667_All	673	-5.84176	3.04863e-08	6.50864e-08	K01897//long-chain acyl-CoA synthetase [EC:6.2.1.3]+ko04146//Peroxisome+ko01100//Metabolic pathways+ko00061//Fatty acid biosynthesis+ko01212//Fatty acid metabolism+ko00071//Fatty acid degradation;K01897//long-chain acyl-CoA synthetase [EC:6.2.1.3]+ko04146//Peroxisome+ko01100//Metabolic pathways+ko00061//Fatty acid biosynthesis+ko01212//Fatty acid metabolism+ko00071//Fatty acid degradation;K01897/…	probable long-chain fatty acid coenzyme A ligase [Cyanidioschyzon merolae strain 10D] >BAM80796.1 probable long-chain fatty acid coenzyme A ligase [Cyanidioschyzon merolae strain 10D]	[I] KOG1256 Long-chain acyl-CoA synthetases (AMP-forming)	AMP-binding enzyme	Long chain acyl-CoA synthetase 6, peroxisomal OS=Arabidopsis thaliana GN=LACS6 PE=1 SV=1			GO:0008152//metabolic process;GO:0004467//long-chain fatty acid-CoA ligase activity;GO:0102391//decanoate--CoA ligase activity;GO:0003824//catalytic activity;GO:0016874//ligase activity
Unigene75589_All	695	-5.84176	3.04863e-08	6.50864e-08				Sel1 repeat
Unigene60588_All	726	-5.84176	3.04863e-08	6.50864e-08		hypothetical protein AURANDRAFT_71291, partial [Aureococcus anophagefferens] >EGB09872.1 hypothetical protein AURANDRAFT_71291, partial [Aureococcus anophagefferens]		PHB/PHA accumulation regulator DNA-binding domain
Unigene59097_All	809	-5.84176	3.04863e-08	6.50864e-08		hypothetical protein BU14_0014s0018 [Porphyra umbilicalis]		Alpha/beta hydrolase of unknown function (DUF900)
Unigene36685_All	656	-5.84176	3.04863e-08	6.50864e-08		hypothetical protein AURANDRAFT_71898, partial [Aureococcus anophagefferens] >EGB07050.1 hypothetical protein AURANDRAFT_71898, partial [Aureococcus anophagefferens]		B12 binding domain
Unigene75726_All	812	-5.84176	3.04863e-08	6.50864e-08				Peptidase family M20/M25/M40
Unigene44046_All	661	-5.84176	3.04863e-08	6.50864e-08				Oxidoreductase molybdopterin binding domain
Unigene75524_All	1008	-5.84176	3.04863e-08	6.50864e-08				AcrB/AcrD/AcrF family
Unigene63546_All	901	-5.84176	3.04863e-08	6.50864e-08				Lipase (class 3)
Unigene62061_All	977	-5.84176	3.04863e-08	6.50864e-08	K14325//RNA-binding protein with serine-rich domain 1+ko03015//mRNA surveillance pathway+ko03013//RNA transport;K14325//RNA-binding protein with serine-rich domain 1+ko03015//mRNA surveillance pathway+ko03013//RNA transport;K14325//RNA-binding protein with serine-rich domain 1+ko03015//mRNA surveillance pathway+ko03013//RNA transport;K14325//RNA-binding protein with serine-rich domain 1+ko03015//…	PREDICTED: serine/arginine-rich splicing factor SR45 [Beta vulgaris subsp. vulgaris] >KMS95775.1 hypothetical protein BVRB_005190 [Beta vulgaris subsp. vulgaris]	[AR] KOG2146 Splicing coactivator SRm160/300, subunit SRm160 (contains PWI domain)	BadF/BadG/BcrA/BcrD ATPase family				GO:0003723//RNA binding;GO:0005509//calcium ion binding
Unigene29112_All	883	-5.84176	3.04863e-08	6.50864e-08		hypothetical protein AXX17_ATUG03440, partial [Arabidopsis thaliana]		Binding-protein-dependent transport system inner membrane component				GO:0006810//transport;GO:0016021//integral component of membrane;GO:0005886//plasma membrane
Unigene68953_All	933	-5.84176	3.04863e-08	6.50864e-08		predicted protein, partial [Chlamydomonas reinhardtii] >EDO95696.1 predicted protein, partial [Chlamydomonas reinhardtii]		PIN domain				GO:0003723//RNA binding;GO:0008168//methyltransferase activity
Unigene61652_All	956	-5.84176	3.04863e-08	6.50864e-08	K03667//ATP-dependent HslUV protease ATP-binding subunit HslU;K03667//ATP-dependent HslUV protease ATP-binding subunit HslU;K03667//ATP-dependent HslUV protease ATP-binding subunit HslU;K03667//ATP-dependent HslUV protease ATP-binding subunit HslU	hypothetical protein CHLNCDRAFT_56057 [Chlorella variabilis] >EFN57346.1 hypothetical protein CHLNCDRAFT_56057 [Chlorella variabilis]	[O] KOG0745 Putative ATP-dependent Clp-type protease (AAA+ ATPase superfamily)	AAA domain (Cdc48 subfamily)	CLP protease regulatory subunit CLPX2, mitochondrial OS=Arabidopsis thaliana GN=CLPX2 PE=3 SV=1		XM_001694972.2 Chlamydomonas reinhardtii ATP-dependent subunit of mitochondrial HslUV protease (HSLU2), partial mRNA	GO:0070011//peptidase activity, acting on L-amino acid peptides;GO:0005524//ATP binding;GO:0009376//HslUV protease complex;GO:0016887//ATPase activity
Unigene70014_All	956	-5.84176	3.04863e-08	6.50864e-08	K03665//GTPase;K03665//GTPase;K03665//GTPase;K03665//GTPase	PREDICTED: GTPase HflX-like [Gossypium hirsutum]	[R] KOG0410 Predicted GTP binding protein	GTP-binding GTPase Middle Region	GTP-binding protein At3g49725, chloroplastic OS=Arabidopsis thaliana GN=At3g49725 PE=2 SV=2			GO:0043022//ribosome binding;GO:0005525//GTP binding;GO:0005737//cytoplasm;GO:0009507//chloroplast
Unigene25197_All	887	-5.84176	3.04863e-08	6.50864e-08				Protein of unknown function (DUF2927)
Unigene75013_All	909	-5.84176	3.04863e-08	6.50864e-08	K01889//phenylalanyl-tRNA synthetase alpha chain [EC:6.1.1.20]+ko00970//Aminoacyl-tRNA biosynthesis;K01889//phenylalanyl-tRNA synthetase alpha chain [EC:6.1.1.20]+ko00970//Aminoacyl-tRNA biosynthesis;K01889//phenylalanyl-tRNA synthetase alpha chain [EC:6.1.1.20]+ko00970//Aminoacyl-tRNA biosynthesis	phenylalanyl-tRNA synthetase alpha subunit (plastid) [Paulinella micropora]	[J] KOG2783 Phenylalanyl-tRNA synthetase	tRNA synthetases class II core domain (F)	Phenylalanine--tRNA ligase, chloroplastic/mitochondrial OS=Arabidopsis thaliana GN=At3g58140 PE=1 SV=1			GO:0006432//phenylalanyl-tRNA aminoacylation;GO:0004826//phenylalanine-tRNA ligase activity;GO:0005524//ATP binding;GO:0000049//tRNA binding;GO:0009536//plastid;GO:0005737//cytoplasm
Unigene35242_All	748	-5.84176	3.04863e-08	6.50864e-08	K00278//L-aspartate oxidase [EC:1.4.3.16]+ko00250//Alanine, aspartate and glutamate metabolism+ko01100//Metabolic pathways+ko00760//Nicotinate and nicotinamide metabolism	hypothetical protein PHYSODRAFT_327550 [Phytophthora sojae] >EGZ19248.1 hypothetical protein PHYSODRAFT_327550 [Phytophthora sojae]		Fumarate reductase flavoprotein C-term				GO:0008734//L-aspartate oxidase activity;GO:0005737//cytoplasm;GO:0009435//NAD biosynthetic process
Unigene47271_All	906	-5.84176	3.04863e-08	6.50864e-08	K00658//2-oxoglutarate dehydrogenase E2 component (dihydrolipoamide succinyltransferase) [EC:2.3.1.61]+ko00310//Lysine degradation+ko00020//Citrate cycle (TCA cycle)+ko01100//Metabolic pathways+ko01110//Biosynthesis of secondary metabolites+ko01200//Carbon metabolism;K00658//2-oxoglutarate dehydrogenase E2 component (dihydrolipoamide succinyltransferase) [EC:2.3.1.61]+ko00310//Lysine degradation+…	PREDICTED: dihydrolipoyllysine-residue succinyltransferase component of 2-oxoglutarate dehydrogenase complex 2, mitochondrial-like isoform X3 [Musa acuminata subsp. malaccensis]	[C] KOG0559 Dihydrolipoamide succinyltransferase (2-oxoglutarate dehydrogenase, E2 subunit)	2-oxoacid dehydrogenases acyltransferase (catalytic domain)	Dihydrolipoyllysine-residue acetyltransferase component 3 of pyruvate dehydrogenase complex, mitochondrial OS=Arabidopsis thaliana GN=At1g54220 PE=1 SV=1			GO:0006099//tricarboxylic acid cycle;GO:0045252//oxoglutarate dehydrogenase complex;GO:0004149//dihydrolipoyllysine-residue succinyltransferase activity
Unigene85220_All	1212	-5.84147	9.91772e-109	1.28148e-107	K09419//heat shock transcription factor, other eukaryote;K09419//heat shock transcription factor, other eukaryote;K09419//heat shock transcription factor, other eukaryote;K09419//heat shock transcription factor, other eukaryote;K09419//heat shock transcription factor, other eukaryote	predicted protein [Phaeodactylum tricornutum CCAP 1055/1] >EEC44465.1 predicted protein [Phaeodactylum tricornutum CCAP 1055/1]	[K] KOG0627 Heat shock transcription factor	HSF-type DNA-binding		HSF		GO:0005634//nucleus;GO:0043565//sequence-specific DNA binding;GO:0003700//DNA binding transcription factor activity
CL3842.Contig1_All	922	-5.82877	7.65308e-111	1.00612e-109		hypothetical protein SPRG_16639 [Saprolegnia parasitica CBS 223.65] >KDO17851.1 hypothetical protein SPRG_16639 [Saprolegnia parasitica CBS 223.65]						GO:0015074//DNA integration;GO:0003677//DNA binding;GO:0006310//DNA recombination
CL10588.Contig2_All	809	-5.81715	0	0
Unigene2885_All	1329	-5.81695	2.06732e-135	3.12236e-134
CL6669.Contig8_All	2492	-5.81671	0	0				EH_Signature domain
CL621.Contig5_All	638	-5.81629	4.01511e-08	8.50084e-08	K03086//RNA polymerase primary sigma factor;K03086//RNA polymerase primary sigma factor;K03086//RNA polymerase primary sigma factor;K03086//RNA polymerase primary sigma factor;K03086//RNA polymerase primary sigma factor	hypothetical protein SOVF_214240, partial [Spinacia oleracea]	[K] LSE1296 A Plastidial RNA polymerase sigma-subunit	Sigma-70 region 2	RNA polymerase sigma factor sigD, chloroplastic OS=Arabidopsis thaliana GN=SIGD PE=2 SV=1
Unigene71561_All	514	-5.81576	8.30159e-15	2.60679e-14		cytochrome c-type biogenesis protein CcmE [Galdieria sulphuraria] >EME30063.1 cytochrome c-type biogenesis protein CcmE [Galdieria sulphuraria]		CcmE				GO:0017003//protein-heme linkage;GO:0017004//cytochrome complex assembly;GO:0016021//integral component of membrane;GO:0005886//plasma membrane
Unigene67368_All	846	-5.81576	8.30159e-15	2.60679e-14	K01462//peptide deformylase [EC:3.5.1.88];K01462//peptide deformylase [EC:3.5.1.88];K01462//peptide deformylase [EC:3.5.1.88];K01462//peptide deformylase [EC:3.5.1.88]	peptide deformylase (plastid) [Paulinella micropora]	[J] KOG3137 Peptide deformylase	Polypeptide deformylase	Peptide deformylase 1A, chloroplastic OS=Solanum lycopersicum GN=PDF1A PE=2 SV=1			GO:0042586//peptide deformylase activity;GO:0046872//metal ion binding;GO:0006412//translation;GO:0009536//plastid;GO:0009507//chloroplast
Unigene42630_All	1357	-5.81051	2.94913e-67	2.68018e-66		hypothetical protein F511_19580 [Dorcoceras hygrometricum]		Outer membrane lipoprotein carrier protein LolA
Unigene43073_All	2583	-5.81051	2.94913e-67	2.68018e-66				Starch-binding associating with outer membrane
Unigene24241_All	1303	-5.80699	5.64806e-41	3.59847e-40				Myc target protein 1
CL777.Contig7_All	2806	-5.80262	1.76957e-221	3.98479e-220	K20547//basic endochitinase B [EC:3.2.1.14]+ko04016//MAPK signaling pathway - plant+ko00520//Amino sugar and nucleotide sugar metabolism+ko01100//Metabolic pathways;K02184//formin 2;K11593//eukaryotic translation initiation factor 2C	carbohydrate-binding protein [Thraustotheca clavata]	[Y] KOG2992 Nucleolar GTPase/ATPase p130	Lectin C-type domain	Sulfated surface glycoprotein 185 OS=Volvox carteri PE=1 SV=1
CL1880.Contig1_All	1350	-5.79766	9.85648e-38	5.90445e-37	K01674//carbonic anhydrase [EC:4.2.1.1]+ko00910//Nitrogen metabolism;K14651//transcription initiation factor TFIID subunit 15+ko03022//Basal transcription factors	similar to hedgehog protein [Cyanidioschyzon merolae strain 10D] >BAM79537.1 similar to hedgehog protein [Cyanidioschyzon merolae strain 10D]	[J] KOG1041 Translation initiation factor 2C (eIF-2C) and related proteins	Lectin C-type domain	Protein argonaute 3 OS=Arabidopsis thaliana GN=AGO3 PE=3 SV=1		XM_001693996.1 Chlamydomonas reinhardtii 88 kDa extracellular polypeptide (ECP88), mRNA	GO:0016539//intein-mediated protein splicing;GO:0008233//peptidase activity;GO:0016021//integral component of membrane
Unigene27849_All	1621	-5.79596	7.68117e-209	1.65115e-207							XM_010470720.2 PREDICTED: Camelina sativa uncharacterized LOC104749139 (LOC104749139), mRNA
Unigene44026_All	978	-5.79089	5.26226e-08	1.10416e-07	K17987//next to BRCA1 gene 1 protein	hypothetical protein BU14_0249s0003 [Porphyra umbilicalis]		FG-GAP repeat
Unigene59882_All	372	-5.78929	5.35211e-08	1.12117e-07
Unigene62777_All	575	-5.78929	5.35211e-08	1.12117e-07		UPF0061 protein [Auxenochlorella protothecoides] >KFM23558.1 UPF0061 protein [Auxenochlorella protothecoides]	[S] KOG2542 Uncharacterized conserved protein (YdiU family)	Uncharacterized ACR, YdiU/UPF0061 family
Unigene72421_All	567	-5.78929	5.35211e-08	1.12117e-07	K22949//FAD synthetase [EC:2.7.7.2]+ko00740//Riboflavin metabolism+ko01100//Metabolic pathways+ko01110//Biosynthesis of secondary metabolites;K22949//FAD synthetase [EC:2.7.7.2]+ko00740//Riboflavin metabolism+ko01100//Metabolic pathways+ko01110//Biosynthesis of secondary metabolites;K22949//FAD synthetase [EC:2.7.7.2]+ko00740//Riboflavin metabolism+ko01100//Metabolic pathways+ko01110//Biosynthesi…	Riboflavin kinase, partial [Zostera marina]		FAD synthetase				GO:0003919//FMN adenylyltransferase activity;GO:0009231//riboflavin biosynthetic process;GO:0008531//riboflavin kinase activity;GO:0009536//plastid
Unigene17509_All	557	-5.78929	5.35211e-08	1.12117e-07				PEP-CTERM motif
Unigene61329_All	718	-5.78929	5.35211e-08	1.12117e-07				Radical SAM superfamily
Unigene29022_All	1283	-5.78929	1.44641e-14	4.49449e-14	K11323//histone arginine demethylase JMJD6 [EC:1.14.11.-]	uncharacterized protein DDB_G0271670, partial [Zea mays]	[A] KOG1869 Splicing coactivator SRm160/300, subunit SRm300	Domain of unknown function (DUF4175)
Unigene40224_All	473	-5.78929	5.35211e-08	1.12117e-07				Protein of unknown function (DUF2853)
Unigene28797_All	645	-5.78929	5.35211e-08	1.12117e-07	K15376//gephyrin [EC:2.10.1.1 2.7.7.75]+ko01100//Metabolic pathways+ko00790//Folate biosynthesis;K15376//gephyrin [EC:2.10.1.1 2.7.7.75]+ko01100//Metabolic pathways+ko00790//Folate biosynthesis;K15376//gephyrin [EC:2.10.1.1 2.7.7.75]+ko01100//Metabolic pathways+ko00790//Folate biosynthesis;K15376//gephyrin [EC:2.10.1.1 2.7.7.75]+ko01100//Metabolic pathways+ko00790//Folate biosynthesis	molybdopterin biosynthesis protein, putative, partial [Ricinus communis]	[H] KOG2371 Molybdopterin biosynthesis protein	Probable molybdopterin binding domain	Molybdopterin biosynthesis protein CNX1 OS=Arabidopsis thaliana GN=CNX1 PE=1 SV=2			GO:0006777//Mo-molybdopterin cofactor biosynthetic process;GO:0032324//molybdopterin cofactor biosynthetic process
Unigene62243_All	812	-5.78929	5.35211e-08	1.12117e-07	K21027//tRNA-5-taurinomethyluridine 2-sulfurtransferase [EC:2.8.1.14];K21027//tRNA-5-taurinomethyluridine 2-sulfurtransferase [EC:2.8.1.14];K21027//tRNA-5-taurinomethyluridine 2-sulfurtransferase [EC:2.8.1.14];K21027//tRNA-5-taurinomethyluridine 2-sulfurtransferase [EC:2.8.1.14]	tRNA (5-methylaminomethyl-2-thiouridylate)- methyltransferase (chromatophore) [Paulinella chromatophora] >ACB42580.1 tRNA (5-methylaminomethyl-2-thiouridylate)- methyltransferase (chromatophore) [Paulinella chromatophora]	[J] KOG2805 tRNA (5-methylaminomethyl-2-thiouridylate)-methyltransferase	tRNA methyl transferase				GO:0008168//methyltransferase activity;GO:0016783//sulfurtransferase activity;GO:0009536//plastid;GO:0008033//tRNA processing
Unigene57769_All	935	-5.78929	5.35211e-08	1.12117e-07	K01868//threonyl-tRNA synthetase [EC:6.1.1.3]+ko00970//Aminoacyl-tRNA biosynthesis;K01868//threonyl-tRNA synthetase [EC:6.1.1.3]+ko00970//Aminoacyl-tRNA biosynthesis;K01868//threonyl-tRNA synthetase [EC:6.1.1.3]+ko00970//Aminoacyl-tRNA biosynthesis;K01868//threonyl-tRNA synthetase [EC:6.1.1.3]+ko00970//Aminoacyl-tRNA biosynthesis;K01868//threonyl-tRNA synthetase [EC:6.1.1.3]+ko00970//Aminoacyl-tR…	threonyl-tRNA synthetase [Nannochloropsis gaditana CCMP526] >EKU20192.1 threonyl-tRNA synthetase [Nannochloropsis gaditana CCMP526]	[J] KOG1637 Threonyl-tRNA synthetase	TGS domain	Threonine--tRNA ligase, chloroplastic/mitochondrial 2 OS=Arabidopsis thaliana GN=EMB2761 PE=2 SV=1		XM_005856109.1 Nannochloropsis gaditana CCMP526 threonyl-tRNA synthetase (TARS), partial mRNA	GO:0004829//threonine-tRNA ligase activity;GO:0005524//ATP binding;GO:0005739//mitochondrion;GO:0006435//threonyl-tRNA aminoacylation;GO:0005737//cytoplasm;GO:0009570//chloroplast stroma
Unigene73733_All	851	-5.78929	5.35211e-08	1.12117e-07		protein disulfide oxidoreductase, putative [Ricinus communis]		DSBA-like thioredoxin domain				GO:0015035//protein disulfide oxidoreductase activity
Unigene47858_All	617	-5.78929	5.35211e-08	1.12117e-07				GDSL-like Lipase/Acylhydrolase family
Unigene23787_All	743	-5.78929	5.35211e-08	1.12117e-07	K13171//serine/arginine repetitive matrix protein 1+ko03015//mRNA surveillance pathway+ko03013//RNA transport;K13171//serine/arginine repetitive matrix protein 1+ko03015//mRNA surveillance pathway+ko03013//RNA transport	PREDICTED: serine/arginine repetitive matrix protein 1-like [Lupinus angustifolius]	[AR] KOG2146 Splicing coactivator SRm160/300, subunit SRm160 (contains PWI domain)	Hint domain
Unigene67155_All	1186	-5.78929	5.35211e-08	1.12117e-07		protein ssnA [Dorcoceras hygrometricum]	[FQ] KOG3968 Atrazine chlorohydrolase/guanine deaminase	Amidohydrolase family				GO:0016812//hydrolase activity, acting on carbon-nitrogen (but not peptide) bonds, in cyclic amides;GO:0008237//metallopeptidase activity;GO:0005737//cytoplasm;GO:0019556//histidine catabolic process to glutamate and formamide
Unigene3335_All	742	-5.78929	5.35211e-08	1.12117e-07		PREDICTED: alpha-keto acid-binding periplasmic protein TakP-like [Ziziphus jujuba]		Bacterial extracellular solute-binding protein, family 7
Unigene35622_All	1519	-5.78929	4.4919e-92	5.14726e-91
CL7545.Contig1_All	528	-5.78715	5.47433e-08	1.14584e-07
Unigene18641_All	2237	-5.78632	3.88422e-233	9.08399e-232				CarboxypepD_reg-like domain
Unigene44130_All	1834	-5.78036	2.93933e-40	1.84666e-39	K01817//phosphoribosylanthranilate isomerase [EC:5.3.1.24]+ko01230//Biosynthesis of amino acids+ko01100//Metabolic pathways+ko01110//Biosynthesis of secondary metabolites+ko00400//Phenylalanine, tyrosine and tryptophan biosynthesis;K01817//phosphoribosylanthranilate isomerase [EC:5.3.1.24]+ko01230//Biosynthesis of amino acids+ko01100//Metabolic pathways+ko01110//Biosynthesis of secondary metaboli…	hypothetical protein F511_08501 [Dorcoceras hygrometricum]	[E] KOG4202 Phosphoribosylanthranilate isomerase	N-(5'phosphoribosyl)anthranilate (PRA) isomerase	DNA-binding protein HU homolog OS=Guillardia theta GN=hup PE=3 SV=1			GO:0004640//phosphoribosylanthranilate isomerase activity;GO:0006568//tryptophan metabolic process
Unigene35961_All	817	-5.78036	2.93933e-40	1.84666e-39		Macrolide-specific efflux protein macA precursor, putative, partial [Ricinus communis]		Barrel-sandwich domain of CusB or HlyD membrane-fusion
CL8530.Contig2_All	791	-5.78017	8.61359e-20	3.30381e-19				Vascular protein family Vasculin-like 1
CL5020.Contig2_All	3678	-5.77903	2.01274e-74	1.97114e-73	K10990//RecQ-mediated genome instability protein 1;K12875//apoptotic chromatin condensation inducer in the nucleus+ko03040//Spliceosome+ko03015//mRNA surveillance pathway+ko03013//RNA transport;K00430//peroxidase [EC:1.11.1.7]+ko01100//Metabolic pathways+ko01110//Biosynthesis of secondary metabolites+ko00940//Phenylpropanoid biosynthesis;K00430//peroxidase [EC:1.11.1.7]+ko01100//Metabolic pathway…	hypothetical protein SDRG_15585 [Saprolegnia diclina VS20] >EQC26647.1 hypothetical protein SDRG_15585 [Saprolegnia diclina VS20]	[T] KOG4743 Cyclin-dependent kinase inhibitor	Concanavalin A-like lectin/glucanases superfamily	Protein TIC 214 OS=Cucumis sativus GN=TIC214 PE=3 SV=2			GO:0004252//serine-type endopeptidase activity;GO:0005576//extracellular region;GO:0016021//integral component of membrane
CL8374.Contig2_All	654	-5.76306	1.80474e-20	7.08678e-20
Unigene62371_All	766	-5.76233	2.5238e-14	7.75985e-14	K02535//UDP-3-O-[3-hydroxymyristoyl] N-acetylglucosamine deacetylase [EC:3.5.1.108]+ko01100//Metabolic pathways;K02535//UDP-3-O-[3-hydroxymyristoyl] N-acetylglucosamine deacetylase [EC:3.5.1.108]+ko01100//Metabolic pathways;K02535//UDP-3-O-[3-hydroxymyristoyl] N-acetylglucosamine deacetylase [EC:3.5.1.108]+ko01100//Metabolic pathways;K02535//UDP-3-O-[3-hydroxymyristoyl] N-acetylglucosamine deacet…	UDP-3-O-[3-hydroxymyristoyl] N-acetylglucosamine deacetylase [Aphanomyces astaci] >ETV70085.1 UDP-3-O-[3-hydroxymyristoyl] N-acetylglucosamine deacetylase [Aphanomyces astaci]	[R] LSE0004 A F-box domain	UDP-3-O-acyl N-acetylglycosamine deacetylase	Probable UDP-3-O-acyl-N-acetylglucosamine deacetylase 1, mitochondrial OS=Arabidopsis thaliana GN=LPXC1 PE=1 SV=2			GO:0008759//UDP-3-O-[3-hydroxymyristoyl] N-acetylglucosamine deacetylase activity;GO:0009245//lipid A biosynthetic process
Unigene58057_All	937	-5.76233	2.5238e-14	7.75985e-14	K01653//acetolactate synthase I/III small subunit [EC:2.2.1.6]+ko00290//Valine, leucine and isoleucine biosynthesis+ko00770//Pantothenate and CoA biosynthesis+ko01230//Biosynthesis of amino acids+ko01100//Metabolic pathways+ko00650//Butanoate metabolism+ko01110//Biosynthesis of secondary metabolites+ko01210//2-Oxocarboxylic acid metabolism+ko00660//C5-Branched dibasic acid metabolism;K01653//acet…	acetolactate synthase small subunit (chloroplast) [Boldia erythrosiphon] >ARO90509.1 acetolactate synthase small subunit (chloroplast) [Boldia erythrosiphon]	[E] KOG2663 Acetolactate synthase, small subunit	Small subunit of acetolactate synthase	Acetolactate synthase small subunit OS=Galdieria sulphuraria GN=ilvH PE=3 SV=1			GO:0009536//plastid;GO:0009082//branched-chain amino acid biosynthetic process;GO:0003984//acetolactate synthase activity
Unigene25263_All	1042	-5.76233	2.5238e-14	7.75985e-14	K18754//protein lin-28;K18754//protein lin-28;K09250//cellular nucleic acid-binding protein	Cold-shock conserved site-containing protein [Cynara cardunculus var. scolymus]	[J] KOG3070 Predicted RNA-binding protein containing PIN domain and invovled in translation or RNA processing	Uncharacterized ACR, COG1430	Glycine-rich protein 2 OS=Nicotiana sylvestris GN=GRP-2 PE=2 SV=1			GO:0003677//DNA binding;GO:0006355//regulation of transcription, DNA-templated
Unigene35899_All	696	-5.76233	8.84677e-40	5.51488e-39
Unigene45049_All	1825	-5.76233	8.84677e-40	5.51488e-39	K13171//serine/arginine repetitive matrix protein 1+ko03015//mRNA surveillance pathway+ko03013//RNA transport;K09566//peptidyl-prolyl isomerase G (cyclophilin G) [EC:5.2.1.8];K22020//mucin-19;K13171//serine/arginine repetitive matrix protein 1+ko03015//mRNA surveillance pathway+ko03013//RNA transport;K13171//serine/arginine repetitive matrix protein 1+ko03015//mRNA surveillance pathway+ko03013//R…	flocculation protein FLO11-like [Spinacia oleracea]	[K] LSE0096 H SON DNA-binding protein/negative regulatory element-binding protein	Bacterial extracellular solute-binding proteins, family 5 Middle
CL209.Contig8_All	1787	-5.76069	7.22164e-08	1.4986e-07	K19219//jumonji domain-containing protein 7;K19219//jumonji domain-containing protein 7	hypothetical protein H310_04570 [Aphanomyces invadans] >ETW04234.1 hypothetical protein H310_04570 [Aphanomyces invadans]	[I] KOG2508 Predicted phospholipase	Cupin-like domain
Unigene3307_All	1428	-5.74865	7.66695e-27	3.61503e-26		hypothetical protein Csa_1G024150 [Cucumis sativus]
Unigene66407_All	671	-5.74865	8.18016e-08	1.6889e-07		putative: flagellar/basal body protein, PACRG (parkin co-regulated gene)-like protein [Ectocarpus siliculosus]	[S] KOG3961 Uncharacterized conserved protein	Parkin co-regulated protein
CL8186.Contig2_All	455	-5.74783	3.39194e-14	1.03695e-13
CL257.Contig9_All	5735	-5.74758	2.78398e-146	4.4537e-145				OTU-like cysteine protease
CL9160.Contig2_All	669	-5.7448	8.51134e-08	1.75393e-07
Unigene1948_All	1134	-5.74406	2.66751e-39	1.64901e-38	K03671//thioredoxin 1;K03671//thioredoxin 1;K03671//thioredoxin 1;K03671//thioredoxin 1;K03671//thioredoxin 1	PREDICTED: thioredoxin M-type, chloroplastic-like [Musa acuminata subsp. malaccensis]	[O] KOG0910 Thioredoxin-like protein	Thioredoxin	Thioredoxin OS=Cyanidium caldarium GN=trxA PE=3 SV=1			GO:0009657//plastid organization;GO:0015035//protein disulfide oxidoreductase activity;GO:0045454//cell redox homeostasis;GO:0006662//glycerol ether metabolic process;GO:0016671//oxidoreductase activity, acting on a sulfur group of donors, disulfide as acceptor;GO:0005623//cell;GO:0042744//hydrogen peroxide catabolic process;GO:0009507//chloroplast
CL3228.Contig2_All	557	-5.74204	8.75617e-08	1.80192e-07	K10260//F-box and WD-40 domain protein 7+ko04120//Ubiquitin mediated proteolysis;K14963//COMPASS component SWD3	hypothetical protein BU14_0048s0031 [Porphyra umbilicalis]	[R] KOG0274 Cdc4 and related F-box and WD-40 proteins	WD domain, G-beta repeat	Lissencephaly-1 homolog OS=Phaeodactylum tricornutum (strain CCAP 1055/1) GN=PHATRDRAFT_17300 PE=3 SV=1
CL8575.Contig3_All	1382	-5.7409	3.6652e-213	8.00333e-212		hypothetical protein AM588_10010869 [Phytophthora nicotianae]		Basic region leucine zipper				GO:0003700//DNA binding transcription factor activity
Unigene85756_All	748	-5.73595	9.32014e-08	1.91425e-07		hypothetical protein AXX17_ATUG03440, partial [Arabidopsis thaliana]		Binding-protein-dependent transport system inner membrane component
Unigene61525_All	388	-5.73484	9.42656e-08	1.93371e-07	K02899//large subunit ribosomal protein L27+ko03010//Ribosome;K02899//large subunit ribosomal protein L27+ko03010//Ribosome;K02899//large subunit ribosomal protein L27+ko03010//Ribosome;K02899//large subunit ribosomal protein L27+ko03010//Ribosome;K02899//large subunit ribosomal protein L27+ko03010//Ribosome	50S ribosomal protein L27 [Phytophthora megakarya]	[J] KOG4600 Mitochondrial ribosomal protein MRP7 (L2)		50S ribosomal protein L27, chloroplastic OS=Phaeodactylum tricornutum (strain CCAP 1055/1) GN=rpl27 PE=3 SV=1			GO:0005840//ribosome;GO:0006412//translation;GO:0003735//structural constituent of ribosome;GO:0009536//plastid;GO:0009507//chloroplast
Unigene47306_All	1113	-5.73484	1.33415e-26	6.25386e-26	K00059//3-oxoacyl-[acyl-carrier protein] reductase [EC:1.1.1.100]+ko01100//Metabolic pathways+ko00061//Fatty acid biosynthesis+ko01212//Fatty acid metabolism+ko00780//Biotin metabolism;K15095//(+)-neomenthol dehydrogenase [EC:1.1.1.208]+ko00902//Monoterpenoid biosynthesis+ko01110//Biosynthesis of secondary metabolites;K15095//(+)-neomenthol dehydrogenase [EC:1.1.1.208]+ko00902//Monoterpenoid bios…	hypothetical protein SPRG_04628 [Saprolegnia parasitica CBS 223.65] >KDO30727.1 hypothetical protein SPRG_04628 [Saprolegnia parasitica CBS 223.65]	[R] KOG1611 Predicted short chain-type dehydrogenase	Protein of unknown function (DUF1178)	Salutaridine reductase OS=Papaver somniferum GN=SALR PE=1 SV=1
Unigene21412_All	784	-5.73484	4.4102e-14	1.34033e-13	K08675//ATP-dependent Lon protease [EC:3.4.21.53];K08675//ATP-dependent Lon protease [EC:3.4.21.53];K08675//ATP-dependent Lon protease [EC:3.4.21.53];K08675//ATP-dependent Lon protease [EC:3.4.21.53]	hypothetical protein F511_08077 [Dorcoceras hygrometricum]	[O] KOG2004 Mitochondrial ATP-dependent protease PIM1/LON	ATP-dependent protease La (LON) substrate-binding domain	Lon protease homolog, mitochondrial OS=Ostreococcus lucimarinus (strain CCE9901) GN=OSTLU_41620 PE=3 SV=1			GO:0004252//serine-type endopeptidase activity;GO:0005524//ATP binding;GO:0004176//ATP-dependent peptidase activity;GO:0030163//protein catabolic process
Unigene70195_All	547	-5.73484	9.42656e-08	1.93371e-07		6-aminohexanoate-dimer hydrolase [Auxenochlorella protothecoides] >KFM27019.1 6-aminohexanoate-dimer hydrolase [Auxenochlorella protothecoides]		Beta-lactamase				GO:0016787//hydrolase activity
Unigene72988_All	542	-5.73484	9.42656e-08	1.93371e-07
Unigene72388_All	471	-5.73484	9.42656e-08	1.93371e-07
Unigene24937_All	582	-5.73484	9.42656e-08	1.93371e-07		predicted protein, partial [Physcomitrella patens]		Branched-chain amino acid transport system / permease component
Unigene67584_All	731	-5.73484	9.42656e-08	1.93371e-07			[A] KOG1869 Splicing coactivator SRm160/300, subunit SRm300	Excalibur calcium-binding domain
Unigene59430_All	789	-5.73484	9.42656e-08	1.93371e-07	K12196//vacuolar protein-sorting-associated protein 4+ko04144//Endocytosis;K22766//fidgetin-like protein 1 [EC:3.6.4.-];K08955//ATP-dependent metalloprotease [EC:3.4.24.-];K08955//ATP-dependent metalloprotease [EC:3.4.24.-];K22766//fidgetin-like protein 1 [EC:3.6.4.-]	PREDICTED: uncharacterized AAA family ATPase y4kL [Ricinus communis]	[O] KOG0730 AAA+-type ATPase	ATPase family associated with various cellular activities (AAA)	Probable inactive ATP-dependent zinc metalloprotease FTSHI 3, chloroplastic OS=Arabidopsis thaliana GN=FTSHI3 PE=1 SV=1			GO:0005634//nucleus;GO:0005524//ATP binding
Unigene60605_All	796	-5.73484	9.42656e-08	1.93371e-07				Bacterial extracellular solute-binding protein
CL2426.Contig2_All	1614	-5.73484	4.4102e-14	1.34033e-13	K00430//peroxidase [EC:1.11.1.7]+ko01100//Metabolic pathways+ko01110//Biosynthesis of secondary metabolites+ko00940//Phenylpropanoid biosynthesis;K00430//peroxidase [EC:1.11.1.7]+ko01100//Metabolic pathways+ko01110//Biosynthesis of secondary metabolites+ko00940//Phenylpropanoid biosynthesis;K04733//interleukin-1 receptor-associated kinase 4 [EC:2.7.11.1]	similar to hedgehog protein [Cyanidioschyzon merolae strain 10D] >BAM79537.1 similar to hedgehog protein [Cyanidioschyzon merolae strain 10D]	[WV] KOG1216 von Willebrand factor and related coagulation proteins	Bacterial extracellular solute-binding proteins, family 5 Middle				GO:0016539//intein-mediated protein splicing;GO:0008233//peptidase activity;GO:0016021//integral component of membrane
Unigene66672_All	901	-5.73484	9.42656e-08	1.93371e-07	K03657//DNA helicase II / ATP-dependent DNA helicase PcrA [EC:3.6.4.12]+ko03420//Nucleotide excision repair+ko03430//Mismatch repair;K03657//DNA helicase II / ATP-dependent DNA helicase PcrA [EC:3.6.4.12]+ko03420//Nucleotide excision repair+ko03430//Mismatch repair;K03657//DNA helicase II / ATP-dependent DNA helicase PcrA [EC:3.6.4.12]+ko03420//Nucleotide excision repair+ko03430//Mismatch repair;…	unnamed protein product [Chondrus crispus] >CDF35935.1 unnamed protein product [Chondrus crispus]	[L] KOG2108 3'-5' DNA helicase	UvrD/REP helicase N-terminal domain	ATP-dependent DNA helicase SRS2-like protein At4g25120 OS=Arabidopsis thaliana GN=SRS2 PE=1 SV=1			GO:0003677//DNA binding;GO:0005524//ATP binding;GO:0004003//ATP-dependent DNA helicase activity
Unigene66365_All	845	-5.73484	9.42656e-08	1.93371e-07	K00208//enoyl-[acyl-carrier protein] reductase I [EC:1.3.1.9 1.3.1.10]+ko01100//Metabolic pathways+ko00061//Fatty acid biosynthesis+ko01212//Fatty acid metabolism+ko00780//Biotin metabolism;K00208//enoyl-[acyl-carrier protein] reductase I [EC:1.3.1.9 1.3.1.10]+ko01100//Metabolic pathways+ko00061//Fatty acid biosynthesis+ko01212//Fatty acid metabolism+ko00780//Biotin metabolism;K00208//enoyl-[acyl…	enoyl-(acyl-carrier-protein) reductase (NADH) (plastid) [Paulinella micropora]	[R] KOG0725 Reductases with broad range of substrate specificities	Enoyl-(Acyl carrier protein) reductase	Enoyl-[acyl-carrier-protein] reductase [NADH], chloroplastic OS=Arabidopsis thaliana GN=MOD1 PE=1 SV=1			GO:0004318//enoyl-[acyl-carrier-protein] reductase (NADH) activity;GO:0006633//fatty acid biosynthetic process;GO:0009536//plastid
Unigene71861_All	894	-5.73484	9.42656e-08	1.93371e-07				Putative bacterial sensory transduction regulator
Unigene24435_All	1140	-5.73484	1.33415e-26	6.25386e-26		hypothetical protein BU14_0081s0035 [Porphyra umbilicalis]		HTH DNA binding domain
Unigene73776_All	1043	-5.73484	9.42656e-08	1.93371e-07		Histidine utilization repressor, putative [Ricinus communis]		UTRA domain
Unigene60157_All	837	-5.73484	9.42656e-08	1.93371e-07		PREDICTED: uncharacterized protein LOC109505404 [Elaeis guineensis]	[R] KOG2840 Uncharacterized conserved protein with similarity to predicted ATPase of the PP-loop superfamily	Major Facilitator Superfamily				GO:0003824//catalytic activity
Unigene73662_All	1085	-5.73484	9.42656e-08	1.93371e-07	K15849//bifunctional aspartate aminotransferase and glutamate/aspartate-prephenate aminotransferase [EC:2.6.1.1 2.6.1.78 2.6.1.79]+ko01230//Biosynthesis of amino acids+ko00960//Tropane, piperidine and pyridine alkaloid biosynthesis+ko00350//Tyrosine metabolism+ko01100//Metabolic pathways+ko00950//Isoquinoline alkaloid biosynthesis+ko01110//Biosynthesis of secondary metabolites+ko00400//Phenylalan…	aspartate aminotransferase [Galdieria sulphuraria] >EME28574.1 aspartate aminotransferase [Galdieria sulphuraria]	[E] KOG0257 Kynurenine aminotransferase, glutamine transaminase K	Aminotransferase class I and II	Nicotianamine aminotransferase A OS=Hordeum vulgare GN=naat-A PE=1 SV=2			GO:0009058//biosynthetic process;GO:0080130//L-phenylalanine:2-oxoglutarate aminotransferase activity;GO:0008483//transaminase activity;GO:0004069//L-aspartate:2-oxoglutarate aminotransferase activity;GO:0003824//catalytic activity;GO:0030170//pyridoxal phosphate binding
Unigene20556_All	1493	-5.73484	1.70564e-51	1.28143e-50	K22133//oxalate---CoA ligase [EC:6.2.1.8]+ko01100//Metabolic pathways+ko00630//Glyoxylate and dicarboxylate metabolism;K22133//oxalate---CoA ligase [EC:6.2.1.8]+ko01100//Metabolic pathways+ko00630//Glyoxylate and dicarboxylate metabolism;K22133//oxalate---CoA ligase [EC:6.2.1.8]+ko01100//Metabolic pathways+ko00630//Glyoxylate and dicarboxylate metabolism;K22133//oxalate---CoA ligase [EC:6.2.1.8]+…	oxalate--CoA ligase-like [Cajanus cajan] >KYP74797.1 Putative peroxisomal-coenzyme A synthetase [Cajanus cajan]	[I] KOG1176 Acyl-CoA synthetase	AMP-binding enzyme	4-coumarate--CoA ligase 2 OS=Solanum tuberosum GN=4CL2 PE=3 SV=1
Unigene40199_All	687	-5.73484	4.4102e-14	1.34033e-13				Saccharopine dehydrogenase NADP binding domain
Unigene27178_All	886	-5.73151	4.71618e-14	1.43175e-13				Timeless protein C terminal region
CL9350.Contig5_All	2517	-5.72886	7.91237e-254	1.9819e-252	K02184//formin 2;K04733//interleukin-1 receptor-associated kinase 4 [EC:2.7.11.1];K02184//formin 2	minus agglutinin [Chlamydomonas reinhardtii]	[I] LSE3870 A Pollen-surface oleosin		Formin-like protein 5 OS=Oryza sativa subsp. japonica GN=FH5 PE=2 SV=2
Unigene26137_All	814	-5.7252	0	0
Unigene14158_All	2384	-5.72094	0	0	K02184//formin 2;K20547//basic endochitinase B [EC:3.2.1.14]+ko04016//MAPK signaling pathway - plant+ko00520//Amino sugar and nucleotide sugar metabolism+ko01100//Metabolic pathways;K02184//formin 2	predicted protein [Micromonas pusilla CCMP1545] >EEH54654.1 predicted protein [Micromonas pusilla CCMP1545]	[K] KOG1474 Transcription initiation factor TFIID, subunit BDF1 and related bromodomain proteins	RNA recognition motif 2	Vegetative cell wall protein gp1 OS=Chlamydomonas reinhardtii GN=GP1 PE=1 SV=1
Unigene4542_All	1304	-5.71887	1.61241e-30	8.30173e-30
CL777.Contig1_All	850	-5.71473	6.59769e-14	1.99054e-13							HG975519.1 Solanum lycopersicum chromosome ch07, complete genome
Unigene38859_All	1933	-5.71442	0	0	K14963//COMPASS component SWD3	F-box domain containing protein [Ectocarpus siliculosus]	[I] KOG1933 Cholesterol transport protein (Niemann-Pick C disease protein)	WD domain, G-beta repeat	Ribosome biogenesis protein WDR12 homolog OS=Chlamydomonas reinhardtii GN=CHLREDRAFT_128420 PE=3 SV=2
Unigene20396_All	311	-5.70683	7.71815e-14	2.32112e-13
Unigene73087_All	1203	-5.70683	7.71815e-14	2.32112e-13		hypothetical protein BU14_0249s0013 [Porphyra umbilicalis]		MotA/TolQ/ExbB proton channel family
CL7427.Contig3_All	759	-5.70683	7.71815e-14	2.32112e-13				Protein of unknown function (DUF2593)
Unigene2514_All	764	-5.70683	1.55567e-50	1.15154e-49	K02184//formin 2;K10956//protein transport protein SEC61 subunit alpha+ko04145//Phagosome+ko04141//Protein processing in endoplasmic reticulum+ko03060//Protein export;K00430//peroxidase [EC:1.11.1.7]+ko01100//Metabolic pathways+ko01110//Biosynthesis of secondary metabolites+ko00940//Phenylpropanoid biosynthesis;K00430//peroxidase [EC:1.11.1.7]+ko01100//Metabolic pathways+ko01110//Biosynthesis of …	hypothetical protein BU14_0130s0023 [Porphyra umbilicalis]	[K] KOG2341 TATA box binding protein (TBP)-associated factor, RNA polymerase II		Formin-like protein 16 OS=Oryza sativa subsp. japonica GN=FH16 PE=2 SV=1
Unigene29087_All	559	-5.70683	7.71815e-14	2.32112e-13	K07766//diphosphoinositol-polyphosphate diphosphatase [EC:3.6.1.52];K07766//diphosphoinositol-polyphosphate diphosphatase [EC:3.6.1.52];K07766//diphosphoinositol-polyphosphate diphosphatase [EC:3.6.1.52];K07766//diphosphoinositol-polyphosphate diphosphatase [EC:3.6.1.52]	hypothetical protein SETIT_031295mg [Setaria italica]	[T] KOG2839 Diadenosine and diphosphoinositol polyphosphate phosphohydrolase	NUDIX domain	Nudix hydrolase 12, mitochondrial OS=Arabidopsis thaliana GN=NUDT12 PE=2 SV=1			GO:0016787//hydrolase activity
Unigene63466_All	1102	-5.70683	7.71815e-14	2.32112e-13		hypothetical protein BVRB_031910, partial [Beta vulgaris subsp. vulgaris]	[A] KOG1869 Splicing coactivator SRm160/300, subunit SRm300	Bacterial extracellular solute-binding protein
Unigene40512_All	528	-5.70683	7.71815e-14	2.32112e-13		unnamed protein product [Chondrus crispus] >CDF34481.1 unnamed protein product [Chondrus crispus]		DDE domain				GO:0003676//nucleic acid binding
Unigene23664_All	1702	-5.70426	1.90326e-135	2.87545e-134				alpha/beta hydrolase fold
CL611.Contig1_All	1706	-5.7023	8.44234e-14	2.53339e-13				Polysulphide reductase, NrfD
Unigene36040_All	622	-5.70059	1.33358e-07	2.70252e-07		hypothetical protein CCACVL1_07788 [Corchorus capsularis]		Bacterial extracellular solute-binding protein
Unigene39384_All	851	-5.6942	2.03893e-110	2.66922e-109		hypothetical protein AURANDRAFT_70670, partial [Aureococcus anophagefferens] >EGB11868.1 hypothetical protein AURANDRAFT_70670, partial [Aureococcus anophagefferens]		Glycosyl hydrolases family 8
Unigene16691_All	1301	-5.69262	7.05967e-26	3.25311e-25	K14491//two-component response regulator ARR-B family+ko04075//Plant hormone signal transduction;K14491//two-component response regulator ARR-B family+ko04075//Plant hormone signal transduction;K14492//two-component response regulator ARR-A family+ko04075//Plant hormone signal transduction;K14491//two-component response regulator ARR-B family+ko04075//Plant hormone signal transduction;K14492//two…	hypothetical protein CEUSTIGMA_g11542.t1 [Chlamydomonas eustigma]	[K] KOG1601 GATA-4/5/6 transcription factors	Response regulator receiver domain	Two-component response regulator ORR13 OS=Oryza sativa subsp. japonica GN=RR13 PE=2 SV=1
Unigene43395_All	1481	-5.69262	7.05967e-26	3.25311e-25	K00128//aldehyde dehydrogenase (NAD+) [EC:1.2.1.3]+ko00410//beta-Alanine metabolism+ko00310//Lysine degradation+ko00010//Glycolysis / Gluconeogenesis+ko00903//Limonene and pinene degradation+ko00380//Tryptophan metabolism+ko00330//Arginine and proline metabolism+ko00280//Valine, leucine and isoleucine degradation+ko01100//Metabolic pathways+ko00053//Ascorbate and aldarate metabolism+ko00340//Hist…	aldehyde dehydrogenase (NAD+) [Galdieria sulphuraria] >EME26154.1 aldehyde dehydrogenase (NAD+) [Galdieria sulphuraria]	[C] KOG2450 Aldehyde dehydrogenase	Aldehyde dehydrogenase family	Aldehyde dehydrogenase family 2 member B4, mitochondrial OS=Arabidopsis thaliana GN=ALDH2B4 PE=1 SV=1			GO:0004029//aldehyde dehydrogenase (NAD) activity;GO:0016491//oxidoreductase activity
CL1977.Contig4_All	1779	-5.69087	7.78915e-279	2.12325e-277	K13098//RNA-binding protein FUS;K13098//RNA-binding protein FUS;K15174//RNA polymerase II-associated factor 1;K13098//RNA-binding protein FUS	PREDICTED: formin-like protein 5 [Tarenaya hassleriana]	[I] LSE3870 A Pollen-surface oleosin	gag-polypeptide of LTR copia-type	ENHANCER OF AG-4 protein 2 OS=Arabidopsis thaliana GN=HUA2 PE=2 SV=1
Unigene57273_All	845	-5.69027	4.71035e-23	2.00979e-22
Unigene67015_All	228	-5.67826	1.66585e-07	3.34695e-07
Unigene61778_All	305	-5.67826	1.66585e-07	3.34695e-07	K22072//iron-sulfur cluster assembly 2;K22072//iron-sulfur cluster assembly 2;K22072//iron-sulfur cluster assembly 2;K22072//iron-sulfur cluster assembly 2	iron-sulfur cluster assembly accessory protein [Ostreococcus tauri]	[CU] KOG1119 Mitochondrial Fe-S cluster biosynthesis protein ISA2 (contains a HesB-like domain)	Iron-sulphur cluster biosynthesis	Iron-sulfur assembly protein IscA-like 2, mitochondrial OS=Arabidopsis thaliana GN=At5g03905 PE=1 SV=2			GO:0097428//protein maturation by iron-sulfur cluster transfer;GO:0005198//structural molecule activity;GO:0051536//iron-sulfur cluster binding
Unigene66177_All	566	-5.67826	1.66585e-07	3.34695e-07	K01755//argininosuccinate lyase [EC:4.3.2.1]+ko00250//Alanine, aspartate and glutamate metabolism+ko00220//Arginine biosynthesis+ko01230//Biosynthesis of amino acids+ko01100//Metabolic pathways+ko01110//Biosynthesis of secondary metabolites;K01755//argininosuccinate lyase [EC:4.3.2.1]+ko00250//Alanine, aspartate and glutamate metabolism+ko00220//Arginine biosynthesis+ko01230//Biosynthesis of amin…	hypothetical protein BU14_0060s0016 [Porphyra umbilicalis]	[E] KOG1316 Argininosuccinate lyase	Lecithin retinol acyltransferase	Argininosuccinate lyase, chloroplastic OS=Arabidopsis thaliana GN=At5g10920 PE=2 SV=1			GO:0004056//argininosuccinate lyase activity;GO:0042450//arginine biosynthetic process via ornithine;GO:0005737//cytoplasm
Unigene61070_All	600	-5.67826	1.66585e-07	3.34695e-07	K13171//serine/arginine repetitive matrix protein 1+ko03015//mRNA surveillance pathway+ko03013//RNA transport;K13171//serine/arginine repetitive matrix protein 1+ko03015//mRNA surveillance pathway+ko03013//RNA transport;K13171//serine/arginine repetitive matrix protein 1+ko03015//mRNA surveillance pathway+ko03013//RNA transport	hypothetical protein AURANDRAFT_71898, partial [Aureococcus anophagefferens] >EGB07050.1 hypothetical protein AURANDRAFT_71898, partial [Aureococcus anophagefferens]	[AR] KOG2146 Splicing coactivator SRm160/300, subunit SRm160 (contains PWI domain)	Tripartite tricarboxylate transporter family receptor
Unigene27584_All	1545	-5.67826	1.23195e-25	5.63872e-25				Transcriptional regulatory protein, C terminal
Unigene59814_All	536	-5.67826	1.66585e-07	3.34695e-07		predicted protein, partial [Physcomitrella patens]		D-ala D-ala ligase N-terminus				GO:0008716//D-alanine-D-alanine ligase activity;GO:0046872//metal ion binding;GO:0005524//ATP binding;GO:0009536//plastid;GO:0005737//cytoplasm
CL4618.Contig2_All	561	-5.67826	1.66585e-07	3.34695e-07		hypothetical protein F511_02365 [Dorcoceras hygrometricum]		ABC transporter
Unigene72643_All	565	-5.67826	1.66585e-07	3.34695e-07				Putative Actinobacterial Holin-X, holin superfamily III
Unigene72402_All	642	-5.67826	1.66585e-07	3.34695e-07	K00847//fructokinase [EC:2.7.1.4]+ko00520//Amino sugar and nucleotide sugar metabolism+ko01100//Metabolic pathways+ko00051//Fructose and mannose metabolism+ko00500//Starch and sucrose metabolism;K00847//fructokinase [EC:2.7.1.4]+ko00520//Amino sugar and nucleotide sugar metabolism+ko01100//Metabolic pathways+ko00051//Fructose and mannose metabolism+ko00500//Starch and sucrose metabolism;K00847//f…	fructokinase 1 [Oryza punctata]	[G] KOG2855 Ribokinase	pfkB family carbohydrate kinase	Fructokinase-1 OS=Oryza sativa subsp. japonica GN=FRK1 PE=1 SV=2			GO:0019252//starch biosynthetic process;GO:0005524//ATP binding;GO:0016301//kinase activity;GO:0016773//phosphotransferase activity, alcohol group as acceptor;GO:0008865//fructokinase activity
Unigene28245_All	890	-5.67826	1.35278e-13	4.02243e-13				Outer membrane protein beta-barrel domain
Unigene73905_All	762	-5.67826	1.66585e-07	3.34695e-07	K01759//lactoylglutathione lyase [EC:4.4.1.5]+ko00620//Pyruvate metabolism;K01759//lactoylglutathione lyase [EC:4.4.1.5]+ko00620//Pyruvate metabolism;K01759//lactoylglutathione lyase [EC:4.4.1.5]+ko00620//Pyruvate metabolism;K01759//lactoylglutathione lyase [EC:4.4.1.5]+ko00620//Pyruvate metabolism;K01759//lactoylglutathione lyase [EC:4.4.1.5]+ko00620//Pyruvate metabolism	Lactoylglutathione lyase [Chondrus crispus] >CDF41417.1 Lactoylglutathione lyase [Chondrus crispus]	[S] LSE0042 A Uncharacterized plastocyanin-like protein, probably non-copper-binding	Glyoxalase/Bleomycin resistance protein/Dioxygenase superfamily	Lactoylglutathione lyase OS=Cicer arietinum PE=2 SV=1			GO:0016829//lyase activity;GO:0051213//dioxygenase activity
Unigene68323_All	908	-5.67826	1.66585e-07	3.34695e-07	K13950//para-aminobenzoate synthetase [EC:2.6.1.85]+ko00790//Folate biosynthesis;K13950//para-aminobenzoate synthetase [EC:2.6.1.85]+ko00790//Folate biosynthesis;K13950//para-aminobenzoate synthetase [EC:2.6.1.85]+ko00790//Folate biosynthesis;K13950//para-aminobenzoate synthetase [EC:2.6.1.85]+ko00790//Folate biosynthesis;K13950//para-aminobenzoate synthetase [EC:2.6.1.85]+ko00790//Folate biosynt…	probable aminodeoxychorismate synthase, chloroplastic isoform X2 [Phalaenopsis equestris]	[E] KOG1223 Isochorismate synthase	chorismate binding enzyme	Probable aminodeoxychorismate synthase, chloroplastic OS=Oryza sativa subsp. japonica GN=ADCS PE=2 SV=1
CL7502.Contig1_All	1009	-5.67826	1.66585e-07	3.34695e-07	K02959//small subunit ribosomal protein S16+ko03010//Ribosome;K02959//small subunit ribosomal protein S16+ko03010//Ribosome;K02959//small subunit ribosomal protein S16+ko03010//Ribosome;K02959//small subunit ribosomal protein S16+ko03010//Ribosome;K02959//small subunit ribosomal protein S16+ko03010//Ribosome	hypothetical protein CISIN_1g030374mg [Citrus sinensis] >KDO64286.1 hypothetical protein CISIN_1g030374mg [Citrus sinensis]	[J] KOG3419 Mitochondrial/chloroplast ribosomal protein S16	Ribosomal protein S16	30S ribosomal protein S16-1, chloroplastic OS=Arabidopsis thaliana GN=RPS16-1 PE=2 SV=1			GO:0005840//ribosome;GO:0006412//translation;GO:0003735//structural constituent of ribosome
Unigene2584_All	1427	-5.67826	1.35278e-13	4.02243e-13	K08776//puromycin-sensitive aminopeptidase [EC:3.4.11.-];K08776//puromycin-sensitive aminopeptidase [EC:3.4.11.-];K08776//puromycin-sensitive aminopeptidase [EC:3.4.11.-];K08776//puromycin-sensitive aminopeptidase [EC:3.4.11.-]	hypothetical protein F511_24277 [Dorcoceras hygrometricum]	[EO] KOG1046 Puromycin-sensitive aminopeptidase and related aminopeptidases	Peptidase family M1	Aminopeptidase M1-A OS=Oryza sativa subsp. japonica GN=Os02g0218200 PE=2 SV=1			GO:0008237//metallopeptidase activity;GO:0008270//zinc ion binding
Unigene65930_All	885	-5.67826	1.66585e-07	3.34695e-07		hypothetical protein F441_22716, partial [Phytophthora parasitica CJ01A1]		Glycosyl transferases group 1
Unigene70114_All	925	-5.67826	1.66585e-07	3.34695e-07	K13171//serine/arginine repetitive matrix protein 1+ko03015//mRNA surveillance pathway+ko03013//RNA transport;K13171//serine/arginine repetitive matrix protein 1+ko03015//mRNA surveillance pathway+ko03013//RNA transport	predicted protein [Physcomitrella patens]	[AR] KOG2146 Splicing coactivator SRm160/300, subunit SRm160 (contains PWI domain)	Tripartite ATP-independent periplasmic transporter, DctM component				GO:0005509//calcium ion binding
Unigene57324_All	968	-5.67826	1.66585e-07	3.34695e-07	K00121//S-(hydroxymethyl)glutathione dehydrogenase / alcohol dehydrogenase [EC:1.1.1.284 1.1.1.1]+ko00010//Glycolysis / Gluconeogenesis+ko00350//Tyrosine metabolism+ko01100//Metabolic pathways+ko01110//Biosynthesis of secondary metabolites+ko00071//Fatty acid degradation+ko01200//Carbon metabolism;K00121//S-(hydroxymethyl)glutathione dehydrogenase / alcohol dehydrogenase [EC:1.1.1.284 1.1.1.1]+ko…	hypothetical protein F511_29957 [Dorcoceras hygrometricum]	[Q] KOG0022 Alcohol dehydrogenase, class III	Alcohol dehydrogenase GroES-like domain	Alcohol dehydrogenase class-3 OS=Zea mays GN=FDH PE=2 SV=1		XM_005648672.1 Coccomyxa subellipsoidea C-169 alcohol dehydrogenase partial mRNA	GO:0006069//ethanol oxidation;GO:0008270//zinc ion binding;GO:0051903//S-(hydroxymethyl)glutathione dehydrogenase activity
Unigene62045_All	914	-5.67826	1.66585e-07	3.34695e-07		hypothetical protein BU14_0546s0005 [Porphyra umbilicalis]
CL106.Contig27_All	1105	-5.67826	1.66585e-07	3.34695e-07		hypothetical protein BVRB_042430, partial [Beta vulgaris subsp. vulgaris]			Uncharacterized protein ORF91 OS=Phalaenopsis aphrodite subsp. formosana PE=4 SV=1		AK110485.1 Oryza sativa Japonica Group cDNA clone:002-167-B02, full insert sequence
Unigene31880_All	765	-5.67826	1.66585e-07	3.34695e-07
Unigene74084_All	1136	-5.67826	1.35278e-13	4.02243e-13	K13171//serine/arginine repetitive matrix protein 1+ko03015//mRNA surveillance pathway+ko03013//RNA transport;K13171//serine/arginine repetitive matrix protein 1+ko03015//mRNA surveillance pathway+ko03013//RNA transport;K13171//serine/arginine repetitive matrix protein 1+ko03015//mRNA surveillance pathway+ko03013//RNA transport;K02184//formin 2;K14325//RNA-binding protein with serine-rich domain …	PREDICTED: serine/arginine repetitive matrix protein 1 isoform X1 [Camelina sativa]	[T] KOG1187 Serine/threonine protein kinase	Putative glutamine amidotransferase	Anther-specific proline-rich protein APG (Fragment) OS=Brassica napus GN=APG PE=2 SV=1			GO:0005743//mitochondrial inner membrane;GO:0016021//integral component of membrane
Unigene20773_All	474	-5.67826	1.35278e-13	4.02243e-13
Unigene44582_All	963	-5.67168	5.13461e-31	2.67409e-30		conserved unknown protein [Ectocarpus siliculosus]		Protein of unknown function (DUF3326)				GO:0003824//catalytic activity
CL1023.Contig4_All	2418	-5.66511	0	0		predicted protein [Phaeodactylum tricornutum CCAP 1055/1] >EEC44429.1 predicted protein [Phaeodactylum tricornutum CCAP 1055/1]		Nucleopolyhedrovirus P10 protein				GO:0016021//integral component of membrane
Unigene31924_All	1830	-5.66376	2.15137e-25	9.79108e-25	K19719//collagen, type II, alpha;K13171//serine/arginine repetitive matrix protein 1+ko03015//mRNA surveillance pathway+ko03013//RNA transport;K22020//mucin-19;K11275//histone H1/5	uncharacterized protein DDB_G0271670, partial [Zea mays]	[AR] KOG2146 Splicing coactivator SRm160/300, subunit SRm160 (contains PWI domain)	Domain of unknown function (DUF4175)
Unigene20462_All	577	-5.66376	2.15137e-25	9.79108e-25
Unigene3492_All	2013	-5.66208	3.01571e-25	1.36821e-24
CL5197.Contig3_All	1358	-5.65323	2.13022e-07	4.2419e-07	K00809//deoxyhypusine synthase [EC:2.5.1.46];K00809//deoxyhypusine synthase [EC:2.5.1.46]	deoxyhypusine synthase [Aphanomyces invadans] >ETW05694.1 deoxyhypusine synthase [Aphanomyces invadans]	[O] KOG2924 Deoxyhypusine synthase	Deoxyhypusine synthase	Deoxyhypusine synthase OS=Arabidopsis thaliana GN=DHS PE=2 SV=1			GO:0008612//peptidyl-lysine modification to peptidyl-hypusine
Unigene60360_All	1233	-5.64911	2.3747e-13	6.9811e-13	K18626//trichohyalin;K18626//trichohyalin;K18626//trichohyalin	type VI secretion system Vgr family protein [Medicago truncatula] >KEH15984.1 type VI secretion system Vgr family protein [Medicago truncatula]		Uncharacterized protein conserved in bacteria (DUF2345)				GO:0016021//integral component of membrane;GO:0097264//self proteolysis
Unigene44028_All	1665	-5.64911	6.83393e-37	4.02829e-36	K14572//midasin+ko03008//Ribosome biogenesis in eukaryotes;K14572//midasin+ko03008//Ribosome biogenesis in eukaryotes;K14572//midasin+ko03008//Ribosome biogenesis in eukaryotes	midasin isoform X3 [Ananas comosus]		AAA domain (dynein-related subfamily)				GO:0005524//ATP binding;GO:0000027//ribosomal large subunit assembly;GO:0030687//preribosome, large subunit precursor;GO:0006364//rRNA processing;GO:0016887//ATPase activity
Unigene75112_All	858	-5.64911	2.3747e-13	6.9811e-13		PREDICTED: uncharacterized protein LOC105037655, partial [Elaeis guineensis]		LysR substrate binding domain	Probable RuBisCO transcriptional regulator OS=Phaeodactylum tricornutum (strain CCAP 1055/1) GN=rbcR PE=3 SV=1		XM_010913296.1 PREDICTED: Elaeis guineensis HTH-type transcriptional regulator EstR-like (LOC105037655), partial mRNA	GO:0003677//DNA binding;GO:0006351//transcription, DNA-templated;GO:0003700//DNA binding transcription factor activity;GO:0009507//chloroplast
CL8644.Contig2_All	1545	-5.64336	0	0	K00428//cytochrome c peroxidase [EC:1.11.1.5];K00428//cytochrome c peroxidase [EC:1.11.1.5]	cytochrome C peroxidase, partial [Thalassiosira pseudonana CCMP1335] >ACI64771.1 cytochrome C peroxidase, partial [Thalassiosira pseudonana CCMP1335]	[R] TWOG0189 Peroxidase	Peroxidase	L-ascorbate peroxidase 3 OS=Arabidopsis thaliana GN=APX3 PE=1 SV=1		XM_001419709.1 Ostreococcus lucimarinus CCE9901 predicted protein partial mRNA	GO:0006979//response to oxidative stress;GO:0020037//heme binding;GO:0034599//cellular response to oxidative stress;GO:0004601//peroxidase activity;GO:0005758//mitochondrial intermembrane space;GO:0042744//hydrogen peroxide catabolic process;GO:0004130//cytochrome-c peroxidase activity;GO:0000302//response to reactive oxygen species
Unigene23811_All	1686	-5.63927	1.193e-36	7.00066e-36				Cleft lip and palate transmembrane protein 1 (CLPTM1)
Unigene33774_All	1235	-5.63432	6.57508e-25	2.95611e-24				CarboxypepD_reg-like domain
Unigene28965_All	1080	-5.63256	5.66272e-43	3.73314e-42		hypothetical protein COCSUDRAFT_61303 [Coccomyxa subellipsoidea C-169] >EIE25059.1 hypothetical protein COCSUDRAFT_61303 [Coccomyxa subellipsoidea C-169]
Unigene33726_All	865	-5.6229	0	0				Fumarate reductase flavoprotein C-term
CL621.Contig1_All	960	-5.62072	1.09415e-24	4.88831e-24	K03086//RNA polymerase primary sigma factor;K03086//RNA polymerase primary sigma factor;K03086//RNA polymerase primary sigma factor;K03086//RNA polymerase primary sigma factor;K03086//RNA polymerase primary sigma factor	alternative sigma factor RpoH [Ostreococcus tauri]	[K] LSE1296 A Plastidial RNA polymerase sigma-subunit	Sigma-70 region 2	RNA polymerase sigma factor sigD, chloroplastic OS=Arabidopsis thaliana GN=SIGD PE=2 SV=1
Unigene71363_All	256	-5.61937	2.95406e-07	5.802e-07
Unigene59918_All	371	-5.61937	2.95406e-07	5.802e-07
Unigene66735_All	477	-5.61937	2.95406e-07	5.802e-07				Protein of unknown function (DUF2852)
Unigene35396_All	1659	-5.61937	3.6408e-36	2.11228e-35	K13171//serine/arginine repetitive matrix protein 1+ko03015//mRNA surveillance pathway+ko03013//RNA transport;K13171//serine/arginine repetitive matrix protein 1+ko03015//mRNA surveillance pathway+ko03013//RNA transport;K09566//peptidyl-prolyl isomerase G (cyclophilin G) [EC:5.2.1.8];K09566//peptidyl-prolyl isomerase G (cyclophilin G) [EC:5.2.1.8];K09566//peptidyl-prolyl isomerase G (cyclophilin …	flocculation protein FLO11-like [Spinacia oleracea]	[GO] KOG4157 beta-1,6-N-acetylglucosaminyltransferase, contains WSC domain	Bacterial extracellular solute-binding protein				GO:0004252//serine-type endopeptidase activity
Unigene70336_All	439	-5.61937	2.95406e-07	5.802e-07		aminotransferase [Achlya hypogyna]	[AR] KOG2146 Splicing coactivator SRm160/300, subunit SRm160 (contains PWI domain)	Aminotransferase class-V
Unigene61470_All	1038	-5.61937	4.1751e-13	1.21283e-12	K00384//thioredoxin reductase (NADPH) [EC:1.8.1.9]+ko00450//Selenocompound metabolism;K00384//thioredoxin reductase (NADPH) [EC:1.8.1.9]+ko00450//Selenocompound metabolism;K00384//thioredoxin reductase (NADPH) [EC:1.8.1.9]+ko00450//Selenocompound metabolism;K00384//thioredoxin reductase (NADPH) [EC:1.8.1.9]+ko00450//Selenocompound metabolism	disulfide oxidoreductase [Dorcoceras hygrometricum]	[O] KOG0404 Thioredoxin reductase	Pyridine nucleotide-disulphide oxidoreductase	Thioredoxin reductase 2 OS=Arabidopsis thaliana GN=NTR2 PE=2 SV=2			GO:0019430//removal of superoxide radicals;GO:0005737//cytoplasm;GO:0004791//thioredoxin-disulfide reductase activity
Unigene69027_All	614	-5.61937	2.95406e-07	5.802e-07	K01000//phospho-N-acetylmuramoyl-pentapeptide-transferase [EC:2.7.8.13]+ko01502//Vancomycin resistance+ko01100//Metabolic pathways;K01000//phospho-N-acetylmuramoyl-pentapeptide-transferase [EC:2.7.8.13]+ko01502//Vancomycin resistance+ko01100//Metabolic pathways;K01000//phospho-N-acetylmuramoyl-pentapeptide-transferase [EC:2.7.8.13]+ko01502//Vancomycin resistance+ko01100//Metabolic pathways;K01000…	Phospho-N-acetylmuramoyl-pentapeptide-transferase, partial [Cajanus cajan]		Glycosyl transferase family 4	Phospho-N-acetylmuramoyl-pentapeptide-transferase homolog OS=Arabidopsis thaliana GN=ATTRANS 11 PE=2 SV=3			GO:0016021//integral component of membrane;GO:0008963//phospho-N-acetylmuramoyl-pentapeptide-transferase activity
Unigene70935_All	518	-5.61937	2.95406e-07	5.802e-07	K14325//RNA-binding protein with serine-rich domain 1+ko03015//mRNA surveillance pathway+ko03013//RNA transport;K14325//RNA-binding protein with serine-rich domain 1+ko03015//mRNA surveillance pathway+ko03013//RNA transport;K14325//RNA-binding protein with serine-rich domain 1+ko03015//mRNA surveillance pathway+ko03013//RNA transport;K14325//RNA-binding protein with serine-rich domain 1+ko03015//…	P-loop containing nucleoside triphosphate hydrolase protein [Fragilariopsis cylindrus CCMP1102]		Cobinamide kinase / cobinamide phosphate guanyltransferase				GO:0051188//cofactor biosynthetic process;GO:0000166//nucleotide binding;GO:0043752//adenosylcobinamide kinase activity;GO:0009236//cobalamin biosynthetic process
Unigene60569_All	670	-5.61937	2.95406e-07	5.802e-07		PREDICTED: sec-independent protein translocase protein TATB, chloroplastic isoform X4 [Nicotiana attenuata]		Type III cell invasion protein SipB	Sec-independent protein translocase protein TATB, chloroplastic OS=Pisum sativum GN=TATB PE=1 SV=1
Unigene75252_All	643	-5.61937	2.95406e-07	5.802e-07		lytic transglycosylase, putative [Ricinus communis]		Transglycosylase SLT domain
Unigene72221_All	588	-5.61937	2.95406e-07	5.802e-07				DnaA N-terminal domain
Unigene67384_All	738	-5.61937	2.95406e-07	5.802e-07	K22020//mucin-19	PREDICTED: type I secretion system membrane fusion protein PrsE-like, partial [Ricinus communis]		Biotin-lipoyl like
CL1643.Contig1_All	742	-5.61937	2.95406e-07	5.802e-07		glucose-1-phosphate adenylyltransferase [Galdieria sulphuraria] >EME28443.1 glucose-1-phosphate adenylyltransferase [Galdieria sulphuraria]	[S] KOG2972 Uncharacterized conserved protein	Transcriptional regulator	Probable transcriptional regulatory protein At2g25830 OS=Arabidopsis thaliana GN=At2g25830 PE=2 SV=2			GO:0008878//glucose-1-phosphate adenylyltransferase activity
CL10296.Contig1_All	525	-5.61937	2.95406e-07	5.802e-07
Unigene68957_All	729	-5.61937	2.95406e-07	5.802e-07	K03883//NADH-ubiquinone oxidoreductase chain 5 [EC:7.1.1.2]+ko01100//Metabolic pathways+ko00190//Oxidative phosphorylation;K03883//NADH-ubiquinone oxidoreductase chain 5 [EC:7.1.1.2]+ko01100//Metabolic pathways+ko00190//Oxidative phosphorylation;K03883//NADH-ubiquinone oxidoreductase chain 5 [EC:7.1.1.2]+ko01100//Metabolic pathways+ko00190//Oxidative phosphorylation;K05577//NAD(P)H-quinone oxidor…	NdhF, partial (chloroplast) [Argemone albiflora]	[C] KOG4668 NADH dehydrogenase subunits 2, 5, and related proteins	Proton-conducting membrane transporter	NAD(P)H-quinone oxidoreductase subunit 5, chloroplastic OS=Ipomoea purpurea GN=ndhF PE=3 SV=1
Unigene61854_All	746	-5.61937	2.95406e-07	5.802e-07	K05642//ATP-binding cassette, subfamily A (ABC1), member 2+ko02010//ABC transporters	PREDICTED: lipopolysaccharide export system ATP-binding protein LptB, partial [Ricinus communis]	[IR] KOG0059 Lipid exporter ABCA1 and related proteins, ABC superfamily	OstA-like protein	ABC transporter F family member 5 OS=Arabidopsis thaliana GN=ABCF5 PE=2 SV=1			GO:0055085//transmembrane transport;GO:0005524//ATP binding;GO:0009536//plastid;GO:0043190//ATP-binding cassette (ABC) transporter complex;GO:0016887//ATPase activity
Unigene71833_All	755	-5.61937	2.95406e-07	5.802e-07				Hint domain
Unigene74442_All	838	-5.61937	2.95406e-07	5.802e-07	K02046//sulfate transport system permease protein+ko00920//Sulfur metabolism+ko02010//ABC transporters;K13171//serine/arginine repetitive matrix protein 1+ko03015//mRNA surveillance pathway+ko03013//RNA transport	sulfate transport protein [Coccomyxa subellipsoidea C-169] >ADV29836.1 sulfate transport protein (plastid) [Coccomyxa subellipsoidea C-169]		Binding-protein-dependent transport system inner membrane component	Probable sulfate transport system permease protein cysT OS=Chlorokybus atmophyticus GN=cysT PE=3 SV=1			GO:0016021//integral component of membrane;GO:0015419//ATPase-coupled sulfate transmembrane transporter activity;GO:0009536//plastid;GO:0009507//chloroplast;GO:0031969//chloroplast membrane
Unigene64640_All	893	-5.61937	2.95406e-07	5.802e-07				Flagella basal body rod protein
Unigene48169_All	616	-5.61937	2.95406e-07	5.802e-07				Domain of unknown function (DUF4270)
Unigene29241_All	546	-5.61937	2.95406e-07	5.802e-07	K09250//cellular nucleic acid-binding protein;K09250//cellular nucleic acid-binding protein;K09250//cellular nucleic acid-binding protein;K09250//cellular nucleic acid-binding protein;K09250//cellular nucleic acid-binding protein	hypothetical protein SOVF_183150 [Spinacia oleracea]	[J] KOG3070 Predicted RNA-binding protein containing PIN domain and invovled in translation or RNA processing		Glycine-rich protein 2 OS=Nicotiana sylvestris GN=GRP-2 PE=2 SV=1			GO:0003677//DNA binding;GO:0006355//regulation of transcription, DNA-templated;GO:0008270//zinc ion binding
Unigene2775_All	664	-5.61937	2.95406e-07	5.802e-07	K02358//elongation factor Tu;K02358//elongation factor Tu;K02358//elongation factor Tu;K02358//elongation factor Tu;K02358//elongation factor Tu	Translation elongation factor, mitochondrial [Ostreococcus lucimarinus CCE9901] >ABO96409.1 Translation elongation factor, mitochondrial [Ostreococcus lucimarinus CCE9901]	[J] KOG0460 Mitochondrial translation elongation factor Tu	Elongation factor Tu domain 2	Elongation factor Tu, chloroplastic OS=Gracilaria tenuistipitata var. liui GN=tufA PE=3 SV=1		KU646497.1 Klebsormidium sp. SAG 51.86 chloroplast, partial genome	GO:0009535//chloroplast thylakoid membrane;GO:0048046//apoplast;GO:0003746//translation elongation factor activity;GO:0003924//GTPase activity;GO:0005730//nucleolus;GO:0009941//chloroplast envelope;GO:0009295//nucleoid;GO:0005525//GTP binding;GO:0009570//chloroplast stroma
Unigene61112_All	967	-5.61937	2.95406e-07	5.802e-07		putative amino-acid ABC transporter permease protein YhdX, partial [Symbiodinium microadriaticum]		Binding-protein-dependent transport system inner membrane component
Unigene44359_All	642	-5.61937	2.95406e-07	5.802e-07
Unigene59536_All	800	-5.61937	1.15071e-24	5.13639e-24	K02888//large subunit ribosomal protein L21+ko03010//Ribosome;K02888//large subunit ribosomal protein L21+ko03010//Ribosome;K02888//large subunit ribosomal protein L21+ko03010//Ribosome;K02888//large subunit ribosomal protein L21+ko03010//Ribosome;K02888//large subunit ribosomal protein L21+ko03010//Ribosome	hypothetical protein BVRB_037680 [Beta vulgaris subsp. vulgaris]	[AR] KOG2146 Splicing coactivator SRm160/300, subunit SRm160 (contains PWI domain)	Ribosomal prokaryotic L21 protein	50S ribosomal protein L21, mitochondrial OS=Arabidopsis thaliana GN=RPL21M PE=2 SV=1			GO:0005840//ribosome;GO:0003723//RNA binding;GO:0006412//translation;GO:0003735//structural constituent of ribosome
Unigene62989_All	952	-5.61937	2.95406e-07	5.802e-07				B12 binding domain
Unigene57553_All	1026	-5.61937	2.95406e-07	5.802e-07	K00253//isovaleryl-CoA dehydrogenase [EC:1.3.8.4]+ko00280//Valine, leucine and isoleucine degradation+ko01100//Metabolic pathways;K00253//isovaleryl-CoA dehydrogenase [EC:1.3.8.4]+ko00280//Valine, leucine and isoleucine degradation+ko01100//Metabolic pathways;K00253//isovaleryl-CoA dehydrogenase [EC:1.3.8.4]+ko00280//Valine, leucine and isoleucine degradation+ko01100//Metabolic pathways	acyl-CoA dehydrogenase, putative, partial [Ricinus communis]	[EI] KOG0141 Isovaleryl-CoA dehydrogenase	Acyl-CoA dehydrogenase, C-terminal domain	2-methylacyl-CoA dehydrogenase, mitochondrial OS=Solanum tuberosum GN=2MBCD PE=1 SV=2			GO:0050660//flavin adenine dinucleotide binding;GO:0003995//acyl-CoA dehydrogenase activity
Unigene63173_All	1007	-5.61937	2.95406e-07	5.802e-07	K14325//RNA-binding protein with serine-rich domain 1+ko03015//mRNA surveillance pathway+ko03013//RNA transport;K14325//RNA-binding protein with serine-rich domain 1+ko03015//mRNA surveillance pathway+ko03013//RNA transport	hypothetical protein GUITHDRAFT_105160 [Guillardia theta CCMP2712] >EKX49076.1 hypothetical protein GUITHDRAFT_105160 [Guillardia theta CCMP2712]		FAM47 family				GO:0016021//integral component of membrane;GO:0030976//thiamine pyrophosphate binding;GO:0016491//oxidoreductase activity;GO:0016903//oxidoreductase activity, acting on the aldehyde or oxo group of donors
Unigene31718_All	779	-5.61937	2.95406e-07	5.802e-07
Unigene24150_All	698	-5.61937	2.95406e-07	5.802e-07
Unigene17517_All	872	-5.61937	2.95406e-07	5.802e-07		hypothetical protein AURANDRAFT_70520 [Aureococcus anophagefferens] >EGB12618.1 hypothetical protein AURANDRAFT_70520 [Aureococcus anophagefferens]	[WV] KOG1216 von Willebrand factor and related coagulation proteins	Substrate binding domain of ABC-type glycine betaine transport system				GO:0016021//integral component of membrane
Unigene61053_All	1078	-5.61937	4.1751e-13	1.21283e-12	K07198//5'-AMP-activated protein kinase, catalytic alpha subunit [EC:2.7.11.11];K07198//5'-AMP-activated protein kinase, catalytic alpha subunit [EC:2.7.11.11];K07198//5'-AMP-activated protein kinase, catalytic alpha subunit [EC:2.7.11.11];K07198//5'-AMP-activated protein kinase, catalytic alpha subunit [EC:2.7.11.11]	CBL-interacting serine/threonine-protein kinase 12 [Sesamum indicum]	[T] KOG0578 p21-activated serine/threonine protein kinase	Protein kinase domain	CBL-interacting protein kinase 26 OS=Oryza sativa subsp. japonica GN=CIPK26 PE=2 SV=1			GO:0007165//signal transduction;GO:0004674//protein serine/threonine kinase activity;GO:0005524//ATP binding;GO:0016021//integral component of membrane
Unigene47799_All	1379	-5.61937	4.1751e-13	1.21283e-12	K00106//xanthine dehydrogenase/oxidase [EC:1.17.1.4 1.17.3.2]+ko04146//Peroxisome+ko00232//Caffeine metabolism+ko00230//Purine metabolism+ko01100//Metabolic pathways+ko01110//Biosynthesis of secondary metabolites;K11817//indole-3-acetaldehyde oxidase [EC:1.2.3.7]+ko00380//Tryptophan metabolism;K09842//abscisic-aldehyde oxidase [EC:1.2.3.14]+ko00906//Carotenoid biosynthesis+ko01100//Metabolic path…	PREDICTED: putative xanthine dehydrogenase YagR molybdenum-binding subunit [Ricinus communis]	[F] KOG0430 Xanthine dehydrogenase	Molybdopterin-binding domain of aldehyde dehydrogenase	Abscisic-aldehyde oxidase OS=Arabidopsis thaliana GN=AAO3 PE=1 SV=1			GO:0016614//oxidoreductase activity, acting on CH-OH group of donors;GO:0009055//electron transfer activity;GO:0051537//2 iron, 2 sulfur cluster binding;GO:0005506//iron ion binding;GO:0050660//flavin adenine dinucleotide binding
CL6694.Contig1_All	297	-5.61937	4.1751e-13	1.21283e-12							KX839261.1 Vischeria sp. CAUP Q 202 chloroplast, complete genome
Unigene6766_All	2187	-5.61756	3.00543e-07	5.90079e-07	K17761//succinate-semialdehyde dehydrogenase, mitochondrial [EC:1.2.1.24]+ko00250//Alanine, aspartate and glutamate metabolism+ko01100//Metabolic pathways+ko00650//Butanoate metabolism;K17761//succinate-semialdehyde dehydrogenase, mitochondrial [EC:1.2.1.24]+ko00250//Alanine, aspartate and glutamate metabolism+ko01100//Metabolic pathways+ko00650//Butanoate metabolism;K17761//succinate-semialdehyd…	predicted protein [Micromonas commoda] >ACO61894.1 predicted protein [Micromonas commoda]	[C] KOG2451 Aldehyde dehydrogenase	Aldehyde dehydrogenase family	Succinate-semialdehyde dehydrogenase, mitochondrial OS=Oryza sativa subsp. japonica GN=ALDH5F1 PE=3 SV=1			GO:0009013//succinate-semialdehyde dehydrogenase [NAD(P)+] activity;GO:0004657//proline dehydrogenase activity;GO:0010133//proline catabolic process to glutamate;GO:0009450//gamma-aminobutyric acid catabolic process;GO:0003700//DNA binding transcription factor activity;GO:0003842//1-pyrroline-5-carboxylate dehydrogenase activity
CL4206.Contig1_All	1241	-5.61455	3.09306e-07	6.06829e-07	K03046//DNA-directed RNA polymerase subunit beta' [EC:2.7.7.6]+ko03020//RNA polymerase;K03046//DNA-directed RNA polymerase subunit beta' [EC:2.7.7.6]+ko03020//RNA polymerase;K03046//DNA-directed RNA polymerase subunit beta' [EC:2.7.7.6]+ko03020//RNA polymerase;K03046//DNA-directed RNA polymerase subunit beta' [EC:2.7.7.6]+ko03020//RNA polymerase;K03046//DNA-directed RNA polymerase subunit beta' […	RNA polymerase beta'' subunit (plastid) [Storeatula sp. CCMP1868]		RNA polymerase Rpb1, domain 5	DNA-directed RNA polymerase subunit beta'' OS=Rhodomonas salina GN=rpoC2 PE=3 SV=1			GO:0003899//DNA-directed 5'-3' RNA polymerase activity;GO:0003677//DNA binding;GO:0006351//transcription, DNA-templated;GO:0009536//plastid;GO:0009507//chloroplast
CL8815.Contig3_All	1268	-5.61451	7.869e-99	9.48028e-98		hypothetical protein THAOC_16311 [Thalassiosira oceanica]		Calcium/calmodulin dependent protein kinase II association domain
CL89.Contig4_All	1428	-5.60764	2.42142e-81	2.54426e-80	K12133//MYB-related transcription factor LHY+ko04712//Circadian rhythm - plant;K12134//circadian clock associated 1+ko04712//Circadian rhythm - plant;K12133//MYB-related transcription factor LHY+ko04712//Circadian rhythm - plant	Transcription factor MYB1R1-like protein [Glycine soja]	[O] KOG0724 Zuotin and related molecular chaperones (DnaJ superfamily), contains DNA-binding domains		Transcription factor MYB1R1 OS=Solanum tuberosum PE=2 SV=1			GO:0003677//DNA binding;GO:0005634//nucleus;GO:0006355//regulation of transcription, DNA-templated;GO:0008270//zinc ion binding;GO:0006351//transcription, DNA-templated
Unigene3690_All	700	-5.60426	2.01536e-24	8.9365e-24		PREDICTED: putative replication protein C [Ricinus communis] >EEF25044.1 conserved hypothetical protein [Ricinus communis]		Replication protein C N-terminal domain
Unigene1452_All	1982	-5.59145	3.70259e-282	1.02161e-280	K14325//RNA-binding protein with serine-rich domain 1+ko03015//mRNA surveillance pathway+ko03013//RNA transport;K14325//RNA-binding protein with serine-rich domain 1+ko03015//mRNA surveillance pathway+ko03013//RNA transport;K14325//RNA-binding protein with serine-rich domain 1+ko03015//mRNA surveillance pathway+ko03013//RNA transport;K14325//RNA-binding protein with serine-rich domain 1+ko03015//…	SAD1p [Chlamydomonas reinhardtii]			Proline-rich receptor-like protein kinase PERK8 OS=Arabidopsis thaliana GN=PERK8 PE=1 SV=1			GO:0005509//calcium ion binding
Unigene32907_All	1708	-5.58899	3.53232e-24	1.5552e-23	K05747//Wiskott-Aldrich syndrome protein+ko04144//Endocytosis;K22020//mucin-19	hypothetical protein EMIHUDRAFT_119073 [Emiliania huxleyi CCMP1516] >EOD16227.1 hypothetical protein EMIHUDRAFT_119073 [Emiliania huxleyi CCMP1516]		Caspase domain
Unigene46790_All	1030	-5.58899	3.53232e-24	1.5552e-23	K03086//RNA polymerase primary sigma factor;K03086//RNA polymerase primary sigma factor	RNA polymerase sigma factor [Guillardia theta]	[K] LSE1296 A Plastidial RNA polymerase sigma-subunit	Sigma-70 region 3	RNA polymerase sigma factor sigD, chloroplastic OS=Arabidopsis thaliana GN=SIGD PE=2 SV=1	Sigma70-like		GO:0003677//DNA binding;GO:0001053//plastid sigma factor activity;GO:0003700//DNA binding transcription factor activity;GO:0016987//sigma factor activity;GO:0006352//DNA-templated transcription, initiation;GO:0009507//chloroplast
Unigene21661_All	1090	-5.58899	3.53232e-24	1.5552e-23				Sulfotransferase family
CL9891.Contig3_All	1087	-5.58797	0	0		D-alanine--D-alanine ligase [Symbiodinium microadriaticum]		Drought induced 19 protein (Di19), zinc-binding
Unigene74041_All	1655	-5.57356	6.19567e-24	2.71077e-23	K13172//serine/arginine repetitive matrix protein 2	hypothetical protein GUITHDRAFT_65587 [Guillardia theta CCMP2712] >EKX51874.1 hypothetical protein GUITHDRAFT_65587 [Guillardia theta CCMP2712]	[C] KOG2258 Glycerophosphoryl diester phosphodiesterase	Glycerophosphoryl diester phosphodiesterase family	Glycerophosphodiester phosphodiesterase GDPD4 OS=Arabidopsis thaliana GN=GDPD4 PE=2 SV=1			GO:0046872//metal ion binding;GO:0003677//DNA binding;GO:0006281//DNA repair;GO:0140078//class I DNA-(apurinic or apyrimidinic site) lyase activity;GO:0016021//integral component of membrane;GO:0005622//intracellular;GO:0008889//glycerophosphodiester phosphodiesterase activity;GO:0004519//endonuclease activity;GO:0140080//class III/IV DNA-(apurinic or apyrimidinic site) lyase activity;GO:0006629/…
CL3787.Contig2_All	2866	-5.57106	9.83993e-276	2.64601e-274	K14325//RNA-binding protein with serine-rich domain 1+ko03015//mRNA surveillance pathway+ko03013//RNA transport;K14325//RNA-binding protein with serine-rich domain 1+ko03015//mRNA surveillance pathway+ko03013//RNA transport;K14325//RNA-binding protein with serine-rich domain 1+ko03015//mRNA surveillance pathway+ko03013//RNA transport;K14325//RNA-binding protein with serine-rich domain 1+ko03015//…	hypothetical protein AURANDRAFT_70520 [Aureococcus anophagefferens] >EGB12618.1 hypothetical protein AURANDRAFT_70520 [Aureococcus anophagefferens]	[S] LSE0125 A Uncharacterized protein	Peroxidase				GO:0005509//calcium ion binding
CL389.Contig3_All	2785	-5.56859	7.4173e-24	3.23871e-23	K01681//aconitate hydratase [EC:4.2.1.3]+ko00020//Citrate cycle (TCA cycle)+ko01230//Biosynthesis of amino acids+ko01100//Metabolic pathways+ko01110//Biosynthesis of secondary metabolites+ko01210//2-Oxocarboxylic acid metabolism+ko01200//Carbon metabolism+ko00630//Glyoxylate and dicarboxylate metabolism;K01681//aconitate hydratase [EC:4.2.1.3]+ko00020//Citrate cycle (TCA cycle)+ko01230//Biosynthe…	aconitate hydratase, cytoplasmic-like [Dorcoceras hygrometricum]	[AJ] KOG0452 RNA-binding translational regulator IRP (aconitase superfamily)	Aconitase family (aconitate hydratase)	Aconitate hydratase 1 OS=Arabidopsis thaliana GN=ACO1 PE=1 SV=2
Unigene8229_All	1997	-5.56423	4.96194e-07	9.56465e-07
CL5321.Contig3_All	474	-5.5636	4.9907e-07	9.61673e-07
CL2857.Contig4_All	1952	-5.5636	4.9907e-07	9.61673e-07	K14638//solute carrier family 15 (peptide/histidine transporter), member 3/4	hypothetical protein Ctob_008225 [Chrysochromulina sp. CCMP291]	[S] KOG3140 Predicted membrane protein	SNARE associated Golgi protein				GO:0016021//integral component of membrane
Unigene71266_All	381	-5.55797	5.25723e-07	1.0099e-06		periplasmic binding protein-like I [Ostreococcus tauri]		Bacterial regulatory proteins, lacI family
Unigene24714_All	394	-5.55797	5.25723e-07	1.0099e-06
Unigene44083_All	355	-5.55797	5.25723e-07	1.0099e-06				TT viral ORF2
Unigene67143_All	481	-5.55797	5.25723e-07	1.0099e-06	K07766//diphosphoinositol-polyphosphate diphosphatase [EC:3.6.1.52]	hypothetical protein CHLNCDRAFT_33911 [Chlorella variabilis] >EFN59479.1 hypothetical protein CHLNCDRAFT_33911 [Chlorella variabilis]	[T] KOG2839 Diadenosine and diphosphoinositol polyphosphate phosphohydrolase	NUDIX domain
Unigene60977_All	400	-5.55797	5.25723e-07	1.0099e-06	K13171//serine/arginine repetitive matrix protein 1+ko03015//mRNA surveillance pathway+ko03013//RNA transport			EamA-like transporter family
Unigene60423_All	524	-5.55797	5.25723e-07	1.0099e-06	K02952//small subunit ribosomal protein S13+ko03010//Ribosome;K02952//small subunit ribosomal protein S13+ko03010//Ribosome;K02952//small subunit ribosomal protein S13+ko03010//Ribosome;K02952//small subunit ribosomal protein S13+ko03010//Ribosome	ribosomal protein S13 (cyanelle) [Cyanophora paradoxa]	[J] KOG3311 Ribosomal protein S18	Ribosomal protein S13/S18	Cyanelle 30S ribosomal protein S13 OS=Cyanophora paradoxa GN=rps13 PE=3 SV=1			GO:0005840//ribosome;GO:0006412//translation;GO:0003735//structural constituent of ribosome;GO:0009842//cyanelle;GO:0019843//rRNA binding
Unigene17082_All	439	-5.55797	5.25723e-07	1.0099e-06
Unigene68941_All	534	-5.55797	5.25723e-07	1.0099e-06	K02184//formin 2;K00430//peroxidase [EC:1.11.1.7]+ko01100//Metabolic pathways+ko01110//Biosynthesis of secondary metabolites+ko00940//Phenylpropanoid biosynthesis	hypothetical protein EMIHUDRAFT_314476 [Emiliania huxleyi CCMP1516] >EOD30800.1 hypothetical protein EMIHUDRAFT_314476 [Emiliania huxleyi CCMP1516]		Alpha/beta hydrolase family	Formin-like protein 5 OS=Oryza sativa subsp. japonica GN=FH5 PE=2 SV=2
Unigene63048_All	482	-5.55797	5.25723e-07	1.0099e-06
Unigene68287_All	530	-5.55797	5.25723e-07	1.0099e-06	K02838//ribosome recycling factor;K02838//ribosome recycling factor;K02838//ribosome recycling factor	ribosome recycling factor [Ostreococcus tauri]	[J] KOG4759 Ribosome recycling factor	Ribosome recycling factor	Ribosome-recycling factor, chloroplastic OS=Arabidopsis thaliana GN=RRF PE=2 SV=2
Unigene68521_All	578	-5.55797	5.25723e-07	1.0099e-06		putative alpha subunit of photoactivated adenylyl cyclase [Euglena stellata]		Sensors of blue-light using FAD	Photoactivated adenylate cyclase subunit alpha OS=Euglena gracilis GN=pacA PE=1 SV=1
Unigene72002_All	606	-5.55797	5.25723e-07	1.0099e-06				Wax ester synthase-like Acyl-CoA acyltransferase domain
Unigene40639_All	434	-5.55797	5.25723e-07	1.0099e-06
Unigene59202_All	650	-5.55797	5.25723e-07	1.0099e-06		RNA polymerase sigma-E factor, putative, partial [Ricinus communis]		Sigma-70 region 2
Unigene63906_All	605	-5.55797	5.25723e-07	1.0099e-06				SnoaL-like domain
Unigene61673_All	1232	-5.55797	1.29674e-12	3.66396e-12	K14325//RNA-binding protein with serine-rich domain 1+ko03015//mRNA surveillance pathway+ko03013//RNA transport	hypothetical protein AURANDRAFT_71909 [Aureococcus anophagefferens] >EGB07034.1 hypothetical protein AURANDRAFT_71909 [Aureococcus anophagefferens]		Periplasmic binding protein				GO:0016539//intein-mediated protein splicing;GO:0008233//peptidase activity;GO:0016021//integral component of membrane
Unigene70569_All	1185	-5.55797	1.29674e-12	3.66396e-12		phenylacetic acid degradation protein, partial [Pfiesteria piscicida]		Phenylacetic acid catabolic protein
Unigene74557_All	1151	-5.55797	1.29674e-12	3.66396e-12	K13171//serine/arginine repetitive matrix protein 1+ko03015//mRNA surveillance pathway+ko03013//RNA transport	hypothetical protein SETIT_034248mg [Setaria italica] >KQK91582.1 hypothetical protein SETIT_034248mg [Setaria italica]	[IR] KOG0059 Lipid exporter ABCA1 and related proteins, ABC superfamily	Periplasmic binding protein	Probable sulfate/thiosulfate import ATP-binding protein CysA OS=Chlorella vulgaris GN=cysA PE=3 SV=1
Unigene58365_All	1738	-5.55797	1.04678e-34	5.88428e-34	K00864//glycerol kinase [EC:2.7.1.30]+ko04626//Plant-pathogen interaction+ko01100//Metabolic pathways+ko00561//Glycerolipid metabolism;K00864//glycerol kinase [EC:2.7.1.30]+ko04626//Plant-pathogen interaction+ko01100//Metabolic pathways+ko00561//Glycerolipid metabolism;K00864//glycerol kinase [EC:2.7.1.30]+ko04626//Plant-pathogen interaction+ko01100//Metabolic pathways+ko00561//Glycerolipid metab…	glycerol kinase [Amborella trichopoda]	[G] KOG2517 Ribulose kinase and related carbohydrate kinases	FGGY family of carbohydrate kinases, N-terminal domain	Glycerol kinase OS=Arabidopsis thaliana GN=GLPK PE=1 SV=1			GO:0010188//response to microbial phytotoxin;GO:0006072//glycerol-3-phosphate metabolic process;GO:0019563//glycerol catabolic process;GO:0080167//response to karrikin;GO:0004370//glycerol kinase activity;GO:0005829//cytosol;GO:0042742//defense response to bacterium;GO:0002237//response to molecule of bacterial origin
Unigene32307_All	547	-5.55797	5.25723e-07	1.0099e-06				PHB/PHA accumulation regulator DNA-binding domain
Unigene44327_All	612	-5.55797	5.25723e-07	1.0099e-06				Tryptophan halogenase
Unigene21254_All	471	-5.55797	5.25723e-07	1.0099e-06
Unigene3402_All	625	-5.55797	5.25723e-07	1.0099e-06				Protein of unknown function (DUF2452)
Unigene58539_All	724	-5.55797	5.25723e-07	1.0099e-06				Domain of unknown function (DUF4189)
Unigene60363_All	841	-5.55797	5.25723e-07	1.0099e-06		polysaccharide deacetylase, partial [Medicago truncatula] >KEH15145.1 polysaccharide deacetylase, partial [Medicago truncatula]		Polysaccharide deacetylase				GO:0005975//carbohydrate metabolic process;GO:0016810//hydrolase activity, acting on carbon-nitrogen (but not peptide) bonds
Unigene24682_All	572	-5.55797	5.25723e-07	1.0099e-06	K00893//deoxycitidine kinase [EC:2.7.1.74]+ko00230//Purine metabolism+ko01100//Metabolic pathways+ko00240//Pyrimidine metabolism	hypothetical protein GUITHDRAFT_57327, partial [Guillardia theta CCMP2712] >EKX35077.1 hypothetical protein GUITHDRAFT_57327, partial [Guillardia theta CCMP2712]	[F] KOG4235 Mitochondrial thymidine kinase 2/deoxyguanosine kinase	Deoxynucleoside kinase				GO:0005524//ATP binding;GO:0016301//kinase activity;GO:0019206//nucleoside kinase activity
Unigene72990_All	774	-5.55797	5.25723e-07	1.0099e-06	K03437//RNA methyltransferase, TrmH family;K03437//RNA methyltransferase, TrmH family;K03437//RNA methyltransferase, TrmH family;K03437//RNA methyltransferase, TrmH family	PREDICTED: LOW QUALITY PROTEIN: uncharacterized protein LOC103954159 [Pyrus x bretschneideri]	[J] KOG2506 SpoU rRNA Methylase family protein
Unigene64363_All	790	-5.55797	5.25723e-07	1.0099e-06		collagen alpha-1(II) chain-like [Helianthus annuus]		Dihydroneopterin aldolase
CL4866.Contig1_All	897	-5.55797	5.25723e-07	1.0099e-06	K00052//3-isopropylmalate dehydrogenase [EC:1.1.1.85]+ko00290//Valine, leucine and isoleucine biosynthesis+ko01230//Biosynthesis of amino acids+ko01100//Metabolic pathways+ko01110//Biosynthesis of secondary metabolites+ko01210//2-Oxocarboxylic acid metabolism+ko00660//C5-Branched dibasic acid metabolism;K00052//3-isopropylmalate dehydrogenase [EC:1.1.1.85]+ko00290//Valine, leucine and isoleucine …	3-isopropylmalate dehydrogenase [Nannochloropsis gaditana CCMP526] >EKU21552.1 3-isopropylmalate dehydrogenase [Nannochloropsis gaditana CCMP526]	[E] KOG0786 3-isopropylmalate dehydrogenase	Isocitrate/isopropylmalate dehydrogenase	3-isopropylmalate dehydrogenase, chloroplastic OS=Brassica napus PE=2 SV=1			GO:0009098//leucine biosynthetic process;GO:0000287//magnesium ion binding;GO:0003862//3-isopropylmalate dehydrogenase activity;GO:0051287//NAD binding;GO:0005737//cytoplasm
Unigene20936_All	750	-5.55797	5.25723e-07	1.0099e-06		predicted protein, partial [Micromonas pusilla CCMP1545] >EEH60988.1 predicted protein, partial [Micromonas pusilla CCMP1545]		GAF domain
Unigene16936_All	696	-5.55797	5.25723e-07	1.0099e-06		hypothetical protein BU14_0470s0007 [Porphyra umbilicalis]		FCD domain
Unigene72163_All	933	-5.55797	5.25723e-07	1.0099e-06		hypothetical protein FRACYDRAFT_187868 [Fragilariopsis cylindrus CCMP1102]		Nucleoside 2-deoxyribosyltransferase YtoQ
Unigene60962_All	733	-5.55797	5.25723e-07	1.0099e-06		LysR transcriptional regulator [Dorcoceras hygrometricum]		LysR substrate binding domain	Probable RuBisCO transcriptional regulator OS=Chlorokybus atmophyticus GN=rbcR PE=3 SV=1			GO:0003677//DNA binding;GO:0006351//transcription, DNA-templated;GO:0009536//plastid;GO:0003700//DNA binding transcription factor activity;GO:0009507//chloroplast
Unigene60325_All	1080	-5.55797	5.25723e-07	1.0099e-06				Sulphur transport
Unigene35536_All	907	-5.55797	5.25723e-07	1.0099e-06		hypothetical protein AXG93_465s1000 [Marchantia polymorpha subsp. ruderalis]		Methane/Phenol/Toluene Hydroxylase
Unigene67891_All	997	-5.55797	1.29674e-12	3.66396e-12		SCP-like extracellular [Monoraphidium neglectum] >KIZ00962.1 SCP-like extracellular [Monoraphidium neglectum]		L,D-transpeptidase catalytic domain
Unigene14631_All	1813	-5.55608	5.34923e-07	1.02698e-06		predicted protein, partial [Thalassiosira pseudonana CCMP1335] >EED88180.1 predicted protein, partial [Thalassiosira pseudonana CCMP1335]	[R] KOG3040 Predicted sugar phosphatase (HAD superfamily)	HAD-hyrolase-like				GO:0008152//metabolic process;GO:0016787//hydrolase activity;GO:0016311//dephosphorylation;GO:0016791//phosphatase activity
Unigene35580_All	2923	-5.55348	2.29429e-78	2.34381e-77	K01687//dihydroxy-acid dehydratase [EC:4.2.1.9]+ko00290//Valine, leucine and isoleucine biosynthesis+ko00770//Pantothenate and CoA biosynthesis+ko01230//Biosynthesis of amino acids+ko01100//Metabolic pathways+ko01110//Biosynthesis of secondary metabolites+ko01210//2-Oxocarboxylic acid metabolism;K01687//dihydroxy-acid dehydratase [EC:4.2.1.9]+ko00290//Valine, leucine and isoleucine biosynthesis+k…	dihydroxy-acid dehydratase, mitochondrial-like [Dorcoceras hygrometricum]	[E] KOG2448 Dihydroxy-acid dehydratase	Dehydratase family	Dihydroxy-acid dehydratase, chloroplastic OS=Arabidopsis thaliana GN=DHAD PE=1 SV=1
CL4941.Contig1_All	806	-5.55294	5.50621e-07	1.05561e-06		XRE family transcriptional regulator [Medicago truncatula] >KEH15186.1 XRE family transcriptional regulator [Medicago truncatula]		Helix-turn-helix				GO:0043565//sequence-specific DNA binding
Unigene16629_All	1207	-5.55273	2.10848e-67	1.92005e-66
CL4902.Contig3_All	1513	-5.55115	1.06469e-52	8.13541e-52	K14325//RNA-binding protein with serine-rich domain 1+ko03015//mRNA surveillance pathway+ko03013//RNA transport;K22020//mucin-19;K05747//Wiskott-Aldrich syndrome protein+ko04144//Endocytosis;K14325//RNA-binding protein with serine-rich domain 1+ko03015//mRNA surveillance pathway+ko03013//RNA transport	stress protein [Chrysochromulina sp. CCMP291]	[W] KOG3544 Collagens (type IV and type XIII), and related proteins	TerD domain	Pistil-specific extensin-like protein OS=Nicotiana tabacum PE=2 SV=1			GO:0004252//serine-type endopeptidase activity;GO:0046872//metal ion binding;GO:0006950//response to stress
Unigene16707_All	1999	-5.54742	1.58614e-23	6.86009e-23	K00344//NADPH2:quinone reductase [EC:1.6.5.5];K10133//tumor protein p53-inducible protein 3 [EC:1.-.-.-];K00344//NADPH2:quinone reductase [EC:1.6.5.5];K10133//tumor protein p53-inducible protein 3 [EC:1.-.-.-]	hypothetical protein SPRG_11220 [Saprolegnia parasitica CBS 223.65] >KDO23790.1 hypothetical protein SPRG_11220 [Saprolegnia parasitica CBS 223.65]	[CR] KOG1198 Zinc-binding oxidoreductase	COQ9	2-methylene-furan-3-one reductase OS=Fragaria vesca GN=EO PE=2 SV=2			GO:0016491//oxidoreductase activity
CL2686.Contig3_All	2021	-5.54473	5.9365e-07	1.1353e-06	K02184//formin 2	conserved unknown protein [Ectocarpus siliculosus]	[W] KOG3544 Collagens (type IV and type XIII), and related proteins	Armadillo/beta-catenin-like repeat
CL10605.Contig1_All	2556	-5.54242	3.47798e-56	2.77038e-55				Calcineurin-like phosphoesterase
CL2298.Contig2_All	3723	-5.53448	1.51362e-179	2.87684e-178	K17761//succinate-semialdehyde dehydrogenase, mitochondrial [EC:1.2.1.24]+ko00250//Alanine, aspartate and glutamate metabolism+ko01100//Metabolic pathways+ko00650//Butanoate metabolism;K17761//succinate-semialdehyde dehydrogenase, mitochondrial [EC:1.2.1.24]+ko00250//Alanine, aspartate and glutamate metabolism+ko01100//Metabolic pathways+ko00650//Butanoate metabolism;K17761//succinate-semialdehyd…	predicted protein [Micromonas commoda] >ACO61894.1 predicted protein [Micromonas commoda]	[C] KOG2451 Aldehyde dehydrogenase	Aldehyde dehydrogenase family	Succinate-semialdehyde dehydrogenase, mitochondrial OS=Arabidopsis thaliana GN=ALDH5F1 PE=1 SV=2			GO:0009013//succinate-semialdehyde dehydrogenase [NAD(P)+] activity;GO:0004657//proline dehydrogenase activity;GO:0004777//succinate-semialdehyde dehydrogenase (NAD+) activity;GO:0051287//NAD binding;GO:0006540//glutamate decarboxylation to succinate;GO:0010133//proline catabolic process to glutamate;GO:0005739//mitochondrion;GO:0009450//gamma-aminobutyric acid catabolic process;GO:0003700//DNA b…
CL2006.Contig1_All	1042	-5.53053	4.51121e-34	2.50195e-33
Unigene87395_All	653	-5.52754	1.21401e-09	2.86997e-09
CL832.Contig2_All	353	-5.52626	5.64971e-34	3.12674e-33
Unigene36629_All	1307	-5.52626	3.35837e-23	1.43762e-22	K01251//adenosylhomocysteinase [EC:3.3.1.1]+ko01100//Metabolic pathways+ko00270//Cysteine and methionine metabolism;K01251//adenosylhomocysteinase [EC:3.3.1.1]+ko01100//Metabolic pathways+ko00270//Cysteine and methionine metabolism;K01251//adenosylhomocysteinase [EC:3.3.1.1]+ko01100//Metabolic pathways+ko00270//Cysteine and methionine metabolism;K01251//adenosylhomocysteinase [EC:3.3.1.1]+ko01100…	unknown [Lotus japonicus]	[H] KOG1370 S-adenosylhomocysteine hydrolase	S-adenosyl-L-homocysteine hydrolase	Adenosylhomocysteinase OS=Nicotiana sylvestris GN=SAHH PE=2 SV=1			GO:0004013//adenosylhomocysteinase activity;GO:0019510//S-adenosylhomocysteine catabolic process;GO:0006730//one-carbon metabolic process;GO:0051287//NAD binding
Unigene44234_All	602	-5.52626	3.35837e-23	1.43762e-22
Unigene74208_All	947	-5.52626	3.35837e-23	1.43762e-22		conserved hypothetical protein, partial [Ricinus communis]		Cell Wall Hydrolase
Unigene59387_All	1202	-5.52626	2.29087e-12	6.38578e-12	K03977//GTPase;K03977//GTPase	hypothetical protein SDRG_01896 [Saprolegnia diclina VS20] >EQC40829.1 hypothetical protein SDRG_01896 [Saprolegnia diclina VS20]	[J] KOG1191 Mitochondrial GTPase	50S ribosome-binding GTPase	GTPase ERA-like, chloroplastic OS=Oryza sativa subsp. japonica GN=Os05g0567300 PE=2 SV=1			GO:0005525//GTP binding
Unigene65917_All	734	-5.52626	2.29087e-12	6.38578e-12	K00799//glutathione S-transferase [EC:2.5.1.18]+ko00480//Glutathione metabolism;K00799//glutathione S-transferase [EC:2.5.1.18]+ko00480//Glutathione metabolism	hypothetical protein CHLNCDRAFT_137523 [Chlorella variabilis] >EFN53025.1 hypothetical protein CHLNCDRAFT_137523 [Chlorella variabilis]	[O] KOG0867 Glutathione S-transferase	Glutathione S-transferase, C-terminal domain				GO:0004364//glutathione transferase activity;GO:0016740//transferase activity
Unigene63889_All	775	-5.52626	2.29087e-12	6.38578e-12				CobQ/CobB/MinD/ParA nucleotide binding domain
Unigene4274_All	899	-5.52241	7.27185e-07	1.38111e-06				Tho complex subunit 7
Unigene76304_All	679	-5.51919	7.48598e-07	1.42037e-06				SGF29 tudor-like domain
Unigene85289_All	1495	-5.51916	7.98047e-181	1.52262e-179		expressed unknown protein [Ectocarpus siliculosus]		Protein of unknown function (DUF3729)
CL7520.Contig3_All	1054	-5.51778	2.20279e-13	6.48761e-13
CL3015.Contig1_All	3307	-5.51484	3.21263e-205	6.82331e-204	K02045//sulfate transport system ATP-binding protein [EC:3.6.3.25]+ko00920//Sulfur metabolism+ko02010//ABC transporters;K02045//sulfate transport system ATP-binding protein [EC:3.6.3.25]+ko00920//Sulfur metabolism+ko02010//ABC transporters;K02045//sulfate transport system ATP-binding protein [EC:3.6.3.25]+ko00920//Sulfur metabolism+ko02010//ABC transporters	ABC transporter (ATP-binding protein), putative [Medicago truncatula] >KEH15262.1 ABC transporter (ATP-binding protein), putative [Medicago truncatula]	[Q] KOG0055 Multidrug/pheromone exporter, ABC superfamily	Bacterial extracellular solute-binding protein	Sulfate/thiosulfate import ATP-binding protein CysA OS=Nephroselmis olivacea GN=cysA PE=3 SV=1			GO:0006810//transport;GO:0005524//ATP binding;GO:0016021//integral component of membrane;GO:0043190//ATP-binding cassette (ABC) transporter complex;GO:0015417//polyamine-transporting ATPase activity;GO:0005886//plasma membrane;GO:0016887//ATPase activity
Unigene18883_All	1475	-5.51464	0	0	K13993//HSP20 family protein+ko04141//Protein processing in endoplasmic reticulum;K13993//HSP20 family protein+ko04141//Protein processing in endoplasmic reticulum;K08744//cardiolipin synthase (CMP-forming) [EC:2.7.8.41]+ko01100//Metabolic pathways+ko00564//Glycerophospholipid metabolism;K13993//HSP20 family protein+ko04141//Protein processing in endoplasmic reticulum;K13993//HSP20 family protein…	PREDICTED: 17.1 kDa class II heat shock protein-like [Nelumbo nucifera]	[O] KOG0710 Molecular chaperone (small heat-shock protein Hsp26/Hsp42)	Hsp20/alpha crystallin family	17.1 kDa class II heat shock protein OS=Pisum sativum GN=HSP17.7 PE=1 SV=1
Unigene42985_All	1277	-5.51419	6.82214e-87	7.49947e-86				RNA polymerase II transcription factor SIII (Elongin) subunit A
Unigene17400_All	640	-5.50949	3.08176e-12	8.53726e-12	K08819//cyclin-dependent kinase 12/13 [EC:2.7.11.22 2.7.11.23];K10990//RecQ-mediated genome instability protein 1	hypothetical protein Naga_101468g1, partial [Nannochloropsis gaditana]	[WV] KOG1216 von Willebrand factor and related coagulation proteins	PT repeat	Classical arabinogalactan protein 6 OS=Arabidopsis thaliana GN=AGP6 PE=2 SV=1			GO:0004252//serine-type endopeptidase activity;GO:0046872//metal ion binding;GO:0005576//extracellular region;GO:0016021//integral component of membrane;GO:0016491//oxidoreductase activity
[truncated: 17,439 more rows]
